# Supplementary material for: Economic impact of medication non-adherence by disease groups: a systematic review
Source: PubMed Central journal article supplement — BMJ Open. 2018 Jan 21;8(1):e016982. doi: 10.1136/bmjopen-2017-016982 (PMC5780689; doi:10.1136/bmjopen-2017-016982), 2018-01-21
Supplement: bmjopen-2017-016982.draft_revisions.pdf [file bmjopen-2017-016982.draft_revisions.pdf]

# BMJ Open

BMJ Open is committed to open peer review. As part of this commitment we make the peer review history of every article we publish publicly available.

When an article is published we post the peer reviewers' comments and the authors' responses online. We also post the versions of the paper that were used during peer review. These are the versions that the peer review comments apply to.

The versions of the paper that follow are the versions that were submitted during the peer review process. They are not the versions of record or the final published versions. They should not be cited or distributed as the published version of this manuscript.

BMJ Open is an open access journal and the full, final, typeset and author-corrected version of record of the manuscript is available on our site with no access controls, subscription charges or pay-per-view fees (<http://bmjopen.bmj.com>).

If you have any questions on BMJ Open's open peer review process please email [editorial.bmjopen@bmj.com](mailto:editorial.bmjopen@bmj.com)

# BMJ Open

## Economic impact of medication nonadherence by disease groups: a systematic review

|                                 |                                                                                                                                                                                                                                                                                                                                                                                                                                                                                                             |
|---------------------------------|-------------------------------------------------------------------------------------------------------------------------------------------------------------------------------------------------------------------------------------------------------------------------------------------------------------------------------------------------------------------------------------------------------------------------------------------------------------------------------------------------------------|
| Journal:                        | <i>BMJ Open</i>                                                                                                                                                                                                                                                                                                                                                                                                                                                                                             |
| Manuscript ID                   | bmjopen-2017-016982                                                                                                                                                                                                                                                                                                                                                                                                                                                                                         |
| Article Type:                   | Research                                                                                                                                                                                                                                                                                                                                                                                                                                                                                                    |
| Date Submitted by the Author:   | 03-Apr-2017                                                                                                                                                                                                                                                                                                                                                                                                                                                                                                 |
| Complete List of Authors:       | Cutler, Rachele; University of Technology, Sydney, Australia, Graduate School of Health; Pharmacy<br>Fernandez-Llimos, Fernando; Universidade de Lisboa Instituto de Investigacao do Medicamento, Social Pharmacy<br>Frommer, Michael; University of Sydney Sydney Medical School, Sydney Medical School<br>Benrimoj, Charlie; University of Technology, Sydney, graduate school of healthth<br>Garcia Cardenas, Victoria; University of Technology, Sydney, Australia, Graduate School of Health; Pharmacy |
| <b>Primary Subject Heading</b>: | Health services research                                                                                                                                                                                                                                                                                                                                                                                                                                                                                    |
| Secondary Subject Heading:      | Global health, Health economics, Health policy, Public health                                                                                                                                                                                                                                                                                                                                                                                                                                               |
| Keywords:                       | Health economics < HEALTH SERVICES ADMINISTRATION & MANAGEMENT, Health policy < HEALTH SERVICES ADMINISTRATION & MANAGEMENT, Quality in health care < HEALTH SERVICES ADMINISTRATION & MANAGEMENT, HEALTH ECONOMICS, PUBLIC HEALTH                                                                                                                                                                                                                                                                          |
|                                 |                                                                                                                                                                                                                                                                                                                                                                                                                                                                                                             |

SCHOLARONE™  
Manuscripts

**Title Page**

**Title:** Economic impact of medication nonadherence by disease groups: a systematic review

**Authors:**

Rachelle L Cutler  
Graduate School of Health  
University of Technology Sydney, Sydney  
Australia

Fernando Fernandez-Llimos  
Research Institute for Medicines (iMed.Ulisboa), Department of Social Pharmacy  
Faculty of Pharmacy, University of Lisbon, Lisbon  
Portugal

Michael Frommer  
Sydney Medical School  
The University of Sydney  
Australia

Shalom I Benrimoj  
Graduate School of Health  
University of Technology Sydney, Sydney  
Australia

Victoria Garcia-Cardenas  
Graduate School of Health  
University of Technology Sydney, Sydney  
Australia

**Corresponding Author:**

Rachelle L Cutler  
Graduate School of Health  
University of Technology Sydney  
City Campus, Broadway, Building 7, Lvl 4, Room 04.02182  
PO Box 123, Broadway NSW 2007 Australia  
rachelle.cutler@uts.edu.au  
+61 2 95147187

**Word Count:**

5014

## Abstract

**Objective:** To determine the economic impact of medication nonadherence across multiple disease groups.

**Design:** Systematic review.

**Evidence Review:** A literature search was conducted in PubMed and Scopus in March 2017 where neither publication date nor language restriction filters were used. Seventy four individual studies assessing the cost of medication nonadherence were included. Relevant information was extracted and quality assessed using the Drummond checklist.

**Results:** Individual studies reported a wide range of costs, calculated using different methods. Disease groups assessed were cardiovascular disease, mental health, diabetes mellitus, osteoporosis, respiratory disease, gastrointestinal disease, epilepsy, HIV/AIDS, Parkinson's disease, musculoskeletal conditions, cancer, addiction, metabolic conditions and blood related conditions. Medication possession ratio was the metric most utilized to calculate patient adherence, but the cut-off points chosen to define nonadherence varied. The main indicators used to measure the cost of nonadherence were total cost or total healthcare cost (81% of studies), pharmacy costs (72%), inpatient costs (51%), outpatient costs (51%), emergency department visit costs (30%), medical costs (27%) and hospitalization costs (18%). Lower levels of adherence were generally associated with higher total costs. The annual adjusted disease state specific economic cost of nonadherence per person ranged from \$949-\$53,504 (in 2015 US dollars). Costs attributed to "all causes" nonadherence ranged from \$5,271 to \$52,341.

**Conclusion:** Medication nonadherence places a significant cost burden on healthcare systems. However, current research assessing the economic impact of medication nonadherence is limited and of varying quality, failing to provide adaptable data to influence health policy and change due to significant variations in costs and their economic implications. Differences in methods make the comparison amongst studies challenging and make an accurate estimation of true magnitude of the cost impossible. Standardization of the metric measures used to estimate medication nonadherence and development of a streamlined approach to quantify costs is required.

**Registration:** CRD42015027338

**Strengths and Limitations of this study:**

- This is the first systematic review assessing the economic impact of medication nonadherence across all disease groups.
- The findings of this review build on current literature and present the first comprehensive analysis of the cost ranges of medication nonadherence within and amongst disease groups whilst simultaneously analyzing the range of outcomes used to estimate costs.
- A large proportion of studies provided insufficient statistical data and considerable heterogeneity to perform a meta-analysis according to outcome/indicators.
- Owing to heterogeneous research design, examination of the economic impact of medication nonadherence was restricted due to the lack of full economic evaluations available.

## 1 Introduction

Nearly half of all adults and approximately 8% of children (aged 5-17 years) worldwide have a chronic condition[1]. This, together with ageing populations, is increasing the demand on healthcare resources. [2]. Medications are a cost-effective treatment modality, but intentional and unintentional inappropriate medication use by patients is common, mostly through differing degrees of adherence termed medication nonadherence. Medication adherence is defined as ‘the extent to which the patients’ behavior matches agreed recommendations from the prescriber’, emphasising the importance on the patients’ decisions and highlighting the modifiable aspect of nonadherence[3].

With estimates of 50% nonadherence to long term therapy for chronic illnesses[4], efforts to improve medication adherence represent an opportunity to improve health outcomes and health system efficiency. The clinical, economic and human consequences of medication nonadherence pose significant burdens. Estimates of the costs range from US\$100-\$290 billion[5] in the United States, €1.25 billion[6] in Europe and approximately A\$7 billion[7 8] in Australia. As well as substantially increasing healthcare costs, nonadherence compromises the effective use of medicines, can decrease patients’ quality of life, increases the risk of medication misadventures, can lead to poor health outcomes, and can result in preventable hospitalizations[9]. Nonadherence is thus a critical clinical and economic problem [4].

An understanding of the economic impact of medication nonadherence on the healthcare system can influence health policy. While the cost of nonadherence for some disease groups has already been analyzed with varying findings, no systematic reviews provide a holistic and comparative picture across disease groups. The objective of this systematic review was, first, to determine the economic impact of medication nonadherence across multiple disease groups, and second, to review and critically appraise the literature to identify the main methodological issues that may explain the differences among reports in the cost calculation and classification of nonadherence.

## 2 Methods

The protocol for this systematic review was registered on the PROSPERO: International prospective register of systematic reviews database (CRD42015027338) and can be accessed at [http://www.crd.york.ac.uk/PROSPERO/display\\_record.asp?ID=CRD42015027338](http://www.crd.york.ac.uk/PROSPERO/display_record.asp?ID=CRD42015027338). The systematic review was undertaken in accordance with PRISMA guidelines[10].

### 2.1 Search strategy and selection criteria

A literature search was conducted in March 2017. Studies reporting the cost of medication nonadherence for any disease state were included. Searches were conducted in PubMed and Scopus. Neither publication date nor language restriction filters were used. The search used in PubMed was: (non-adherence[TIAB]) OR (“Patient Compliance”[MH] AND (“Drug Therapy”[MH]) OR medication[TIAB])) OR “Medication adherence”[MH] AND (costs[TIAB] OR “Costs and Cost Analysis”[MH] OR burden[TIAB]). This was adapted for other databases. Duplicate records were removed.

To identify relevant articles, an initial title and abstract screening was conducted by the lead reviewer (RC) to identify studies appropriate to the study question. This process was over-inclusive. In the second phase appraisal, potentially relevant full text papers were read and excluded based on the following criteria: i) papers not reporting the cost of medication nonadherence, ii) systematic reviews, iii) papers not reporting a baseline cost of medication nonadherence prior to the provision of an intervention and iv) papers not reporting original data. Any uncertainty was discussed amongst two adherence experts (RC and VGC) and resolved via consensus.

### 2.2 Extracted information

A data extraction form was developed based on the Cochrane Handbook for systematic reviews[11] and piloted on a sample of included studies. The extracted information included the source (study identification, citation and title), eligibility (confirmation of inclusion criteria), objective, methods (study design, study groups, year data extracted, follow up period, comparison, adherence measure, adherence data source and adherence definition), population (sample size, setting, country, disease state/drug studied, inclusion/exclusion criteria and perspective), impact/outcome indicators (indicators measured, indicator data source, indicator definitions and characteristics of the method of assessment), results (costs reported, standardized costs, type of costs, non-cost findings, sub-

1  
2  
3 group analysis and statistical significance), conclusions and miscellaneous (funding source,  
4 references to other relevant studies, limitations and reviewers comments).  
5  
6

7 All costs were converted to US dollars (2015 values) using the Cochrane Economics Methods Group -  
8 Evidence for Policy and Practice Information and Coordinating -Centre Cost Converter tool [12],  
9 allowing meaningful comparisons between nonadherence cost data. This online tool uses a two  
10 stage computation process to adjust estimates of costs for currency and/or price year utilizing a  
11 Gross Domestic Product deflator index and Purchasing Power Parities for Gross Domestic  
12 Product[12]. The PPP values given by the International Monetary Fund were chosen. If details of the  
13 original price year could not be ascertained from a study the mid-point year of the study period was  
14 used for calculations. The mean cost was calculated and reported where studies separated out costs  
15 for different confounding factors within the one outcome measure in a disease state. Annual costs  
16 were extrapolated from the original study data if results were not presented in this manner.  
17  
18  
19  
20  
21  
22

23  
24 The cost analysis of studies (figures 2 and 3) reported annual medication nonadherence costs  
25 incurred by the patient from a healthcare provider perspective. The definition of medication  
26 nonadherence was derived from the included studies; with nonadherence referring to differing  
27 degrees of adherence based on the studies metric of estimation. The most utilized methods were  
28 medication possession ratio (MPR) and proportion of days covered (PDC). Multiple nonadherence  
29 costs from individual studies may have been included where further sub-classification of  
30 nonadherence levels was defined. The analysis assessed nonadherence costs within disease groups,  
31 with disease group and cost classification derived from the study. Total healthcare costs included  
32 direct costs to the healthcare system while total costs incorporated direct and indirect costs.  
33  
34  
35  
36  
37  
38

### 39 **2.3 Quality criteria and economic evaluation classification**

40  
41 Economic evaluation requires a comparison of two or more alternative courses of action, while  
42 considering both the inputs and outputs associated with each [13]. All studies were classified in  
43 accordance with Drummond's distinguishing characteristics of healthcare evaluations as either  
44 partial evaluations (outcome description, cost description, cost-outcome description, efficacy or  
45 effectiveness evaluation, cost analysis) or full economic evaluations (cost benefit analysis, cost utility  
46 analysis, cost effectiveness analysis, cost minimization analysis).  
47  
48  
49  
50  
51

52 The Drummond checklist [14] for economic evaluation was used to assess the quality of studies. The  
53 original checklist was modified to remove inapplicable items (4, 5, 12, 14, 15, 30 and 31) as no full  
54 economic evaluation met all inclusion criteria. A score of 1 was assigned if the study included the  
55 required item and zero if it did not with a maximum potential score of 28. The study was classified as  
56  
57  
58  
59  
60



1  
2  
3 high quality if at least 75% of Drummond's criteria were satisfied, medium quality if 51-74% were  
4 satisfied and low quality if 50% of the criteria or less were satisfied.  
5  
6  
7  
8

#### 9 **2.4 Meta-Analysis**

10  
11 Outcome/indicator costs were independently extracted utilising predesigned data extraction forms  
12 (total healthcare costs, total costs, inpatient costs, outpatient costs, pharmacy costs, medical costs,  
13 emergency department costs, and hospitalisation costs) for the purpose of integrating the findings  
14 on the cost of medication nonadherence to pool data and increase the power of analysis.  
15  
16  
17  
18  
19  
20  
21  
22  
23  
24  
25  
26  
27  
28  
29  
30  
31  
32  
33  
34  
35  
36  
37  
38  
39  
40  
41  
42  
43  
44  
45  
46  
47  
48  
49  
50  
51  
52  
53  
54  
55  
56  
57  
58  
59  
60

### 3 Results

#### 3.1 Study Selection

Search strategies retrieved 2691 potential articles after duplicates were removed. Two hundred and sixty six articles were selected for full text review. Seventy four studies were included in the review (Figure 1).

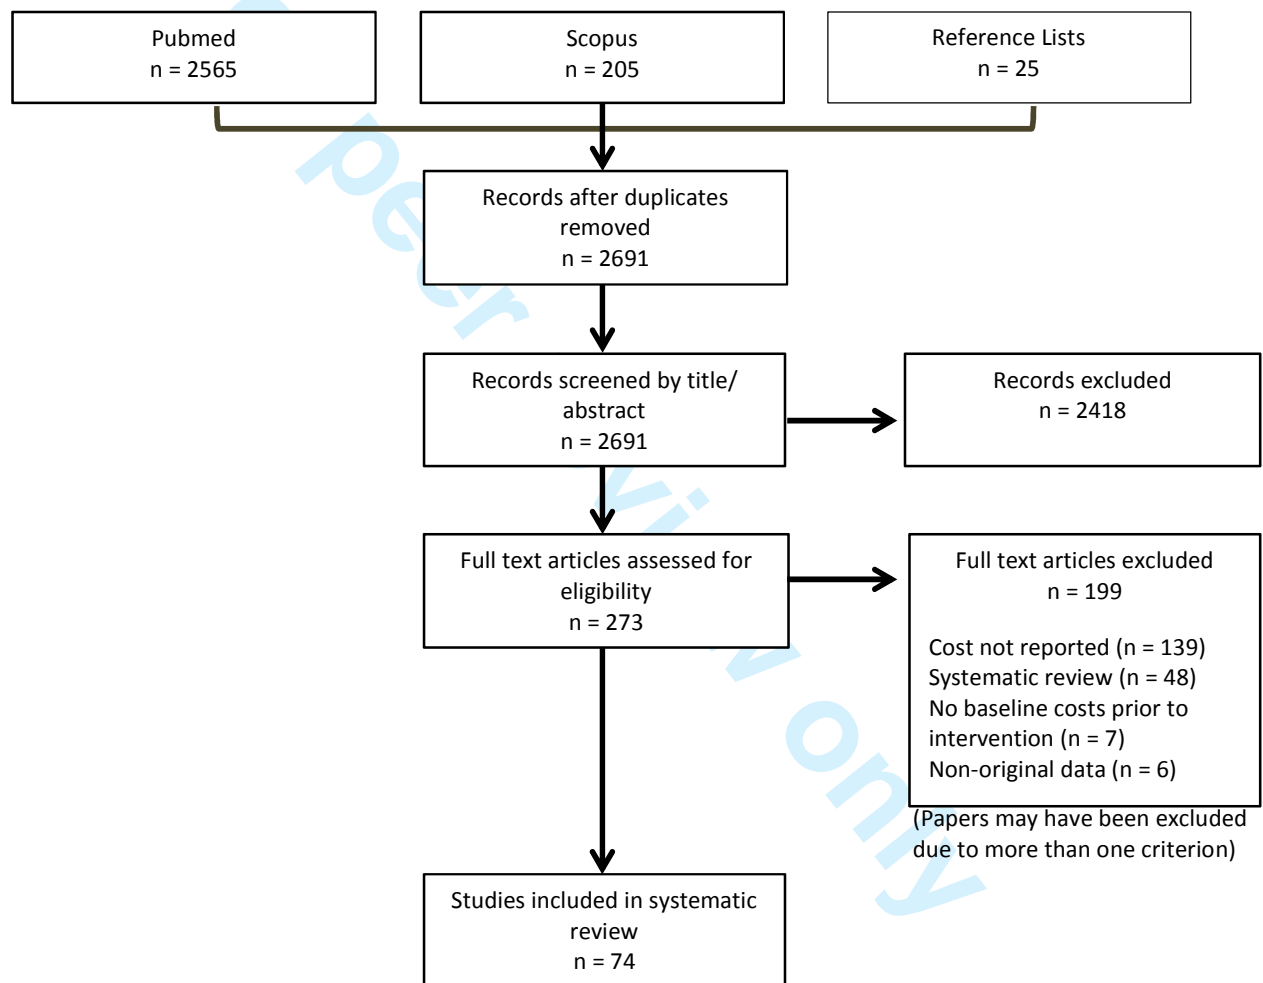

Figure 1: Flow diagram of references identified, retrieved and included in the systematic review

### 3.2 Characteristics of individual studies

Sixty-one studies (82%) were conducted in the United States[15-75], four in Europe[76-79], four in Asia[80-83], three in Canada[84-86], one in the United Kingdom[87] and one across multiple countries throughout Europe and the United Kingdom[88]. Publication years ranged from 1997 to 2016. Individual studies reported a large variety of costs, calculated by varying means. Forty-one studies (55%) reported unadjusted costs[15 19 20 23 25-29 31-36 39 41-43 45-49 51 56-59 61 62 66 69 75 77-79 81-83 88], 19 (25%) adjusted costs[16-18 22 24 37 44 50 52-54 60 65 67 70-72 76 80], 11 a combination of adjusted and unadjusted[21 30 38 40 55 63 64 68 73 74 86], two unadjusted and predicted[84 85] and one predicted costs[87]. The method of determining nonadherence ranged significantly between studies with majority of papers utilizing pharmacy claims data (87%)[15-22 24-45 48 50 52-77 81-86]. Some studies utilized a combination of surveys or questionnaires, observational assessment, previous study data, disease state specific recommended guidelines and health claims data. Medication possession ratio (MPR) was the most utilized method to calculate patient nonadherence with 48 studies (64%) reporting nonadherence based on this measure[17 18 21 22 25-29 33-37 39 40 42-44 48 50 51 53-57 61-72 75-77 81-86]; however, the cut-off points to define medication nonadherence differed with some studies classifying nonadherence as less than 80% medication possession and others through sub-classification of percentage ranges (e.g. 0-20%, 20-40%, 40-60%, 60-80%, 80-100%). The proportion of days covered (PDC) was the next most common measure of nonadherence (9%)[24 30 38 41 45 73 74], with all other studies utilizing an array of measures including self-report[87], urine testing[49], observational assessment[88], time to discontinuation[52], cumulative possession ratio[16], disease specific medication management guidelines[59 78], Morisky 4-Item scale[46], medication gaps[31], prescription refill rates[15 20] and medication supplies[60]. The main characteristics of the included studies are summarised in eTable 1.

### 3.3 Quality assessment and classification of economic evaluations

The quality assessment of economic evaluations yielded 10 studies of high [26 30 33 43 44 50 65 69 76 82], 55 of medium [15-19 21-25 27-29 31 32 34-41 46-49 51 52 54-57 59-61 63 64 66 67 70-75 77 78 80 83-88] and nine of low quality [20 42 53 58 62 68 79 81]. Scores ranged from 26.1% to 87.5% (mean 62.9%). Only one study identified the form of economic evaluation used and justified it in relation to the questions that were being addressed [65]. The item 'the choice of discount rate is stated and justified' was applicable only to studies covering a time period of more than one year; all studies that cover more than one year failed to identify or explain why costs had not been discounted. Details of the analysis and interpretation of results were lacking in the majority of studies resulting in medium or low quality scores.

Through utilisation of Drummond's distinguishing characteristics of healthcare evaluations criteria [13] it is apparent that no full economic evaluation was conducted in any of the included studies. All studies performed partial economic evaluations of varying extents. The classification of economic evaluations resulted in 54 cost description studies (72% of those included), 15 cost outcome descriptions and five cost analysis studies (eTable 1).

### 3.4 Medication nonadherence and costs

The adjusted total cost of nonadherence across all disease groups ranged from \$949 to \$53,504, while the unadjusted total cost ranged from \$669 to \$162,699. Figures 2 and 3 highlight the minimum, maximum and interquartile range of annual costs incurred by patients across disease groups where three or more studies were included for review. All cause costs encompass nonadherence costs incurred in mixed disease state studies, taking into account other confounding factors such as comorbidities.

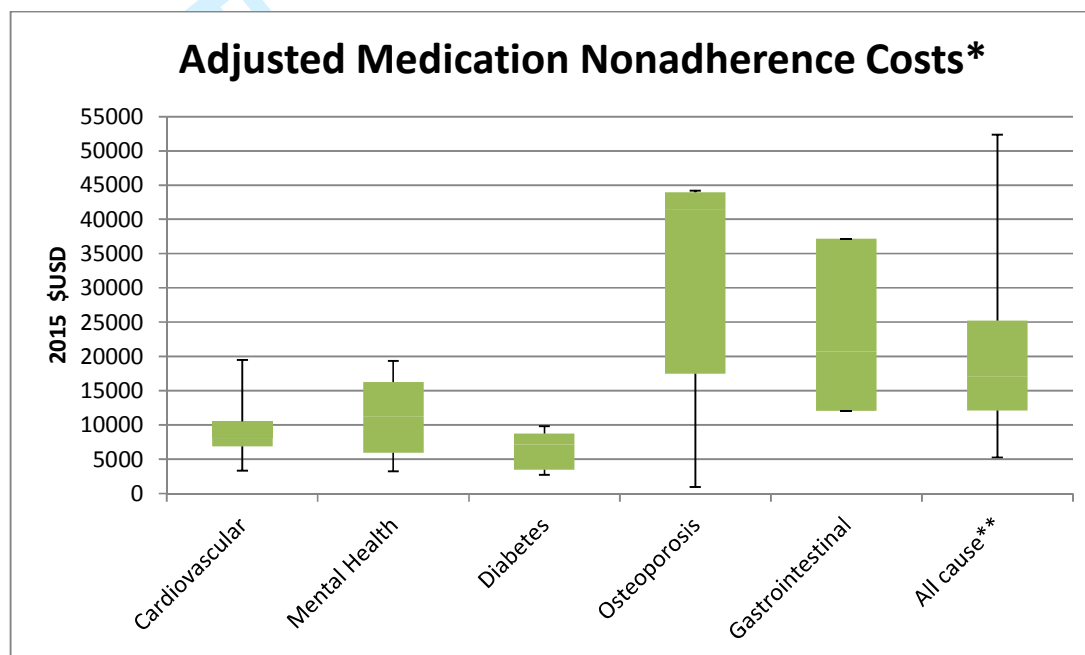

**Figure 2: Annual Adjusted Medication Nonadherence Costs**

\*Disease groups with three or more studies were included. Gastrointestinal only included three studies limiting the range of costs.

\*\* All cause costs: mixed disease state studies

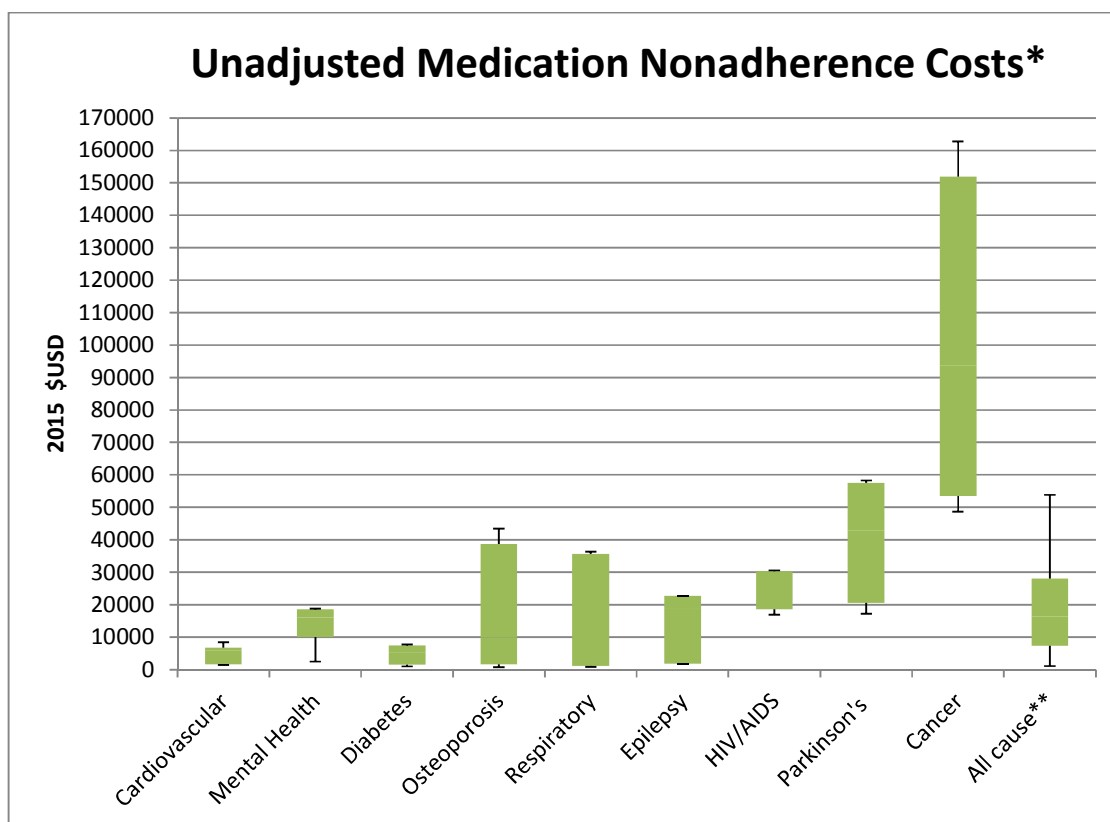

**Figure 3: Annual Unadjusted Medication Nonadherence Costs**

\*Disease groups with three or more studies were included. Epilepsy only included three studies limiting the range of costs.

\*\* All cause costs: mixed disease state studies

Many different indicators were used to estimate medication nonadherence costs. The main ones were total cost or total healthcare cost (83%), pharmacy costs (70%), outpatient costs (50%), inpatient costs (47%), , medical costs (29%) , emergency department costs (28%), and hospitalization costs (18%) (eTable 1).

Lower levels of adherence across all measures (*e.g.* MPR, PDC) were generally associated with higher total costs. From those that reported total or total healthcare costs, 37 studies (50%) reported nonadherence costs to be greater than adherence costs[17 18 20 22 24 25 27 30-32 35 36 40 42 43 48 49 51 54-58 64-72 76 85-88] and 11 studies (15%) reported nonadherence costs to be less than adherence costs[16 19 29 37 52 56 59 75 81 83 84]. Four reported fluctuating findings based on varying nonadherence cost subcategories[26 41 61 82] and two studies reported conflicting findings between adjusted and unadjusted costs [73 74]. Sunyecz et al[62], Eisenberg et al[34] and Joe et al[80] reported all cause total nonadherence costs to be higher (\$28,395 vs. \$24,134, \$7,551 vs. \$7,051 and \$5,271 vs. \$4,375)) but disease group specific nonadherence costs to be lower (\$1923 vs. \$3273, \$703 vs. \$1012 and \$3,252 vs. \$4,151) whereas Hansen et al[40] reported all cause total

1  
2  
3 nonadherence costs to be lower (\$18540 vs. \$52302) but disease group specific nonadherence total  
4 costs to be higher (\$3,879 vs. \$2,954).  
5  
6

7 The association between nonadherence and cost was determined through use of a variety of scaling  
8 systems. The most utilized methods were MPR and PDC. These measures could then further be sub-  
9 categorized based on the percentage of adherence/nonadherence. The 80-100% category was  
10 classified as the most adherent group across both scales, with the most common definition of  
11 nonadherence being <80% MPR or PDC.  
12  
13  
14

### 15 **Cardiovascular Disease**

16  
17  
18 Twelve studies measured the economic impact of medication nonadherence in cardiovascular  
19 disease [17 24 54 55 58 60 61 70 75 82 84 85]. Six studies reported adjusted costs [17 24 54 55 60  
20 70] with annual costs being extrapolated for two of these[24 54]. Total healthcare costs and/or total  
21 costs were assessed in all of the studies with the major indicators measured including pharmacy  
22 costs<sup>16,20,21,23,25</sup>, medical costs<sup>15,16,20, 23,25</sup> and outpatient costs<sup>16, 21</sup>. The annual economic cost of  
23 nonadherence ranged from \$3,347 to \$19,472. Sokol et al[60] evaluated the economic impact of  
24 medication nonadherence across three cardiovascular conditions; hypertension,  
25 hypercholesterolemia and chronic heart failure. For all three cardiovascular conditions examined,  
26 pharmacy costs were higher for the 80-100% adherent group than for the less adherent groups.  
27 Total costs and medical costs were lower for the adherent groups of hypertension and  
28 hypercholesterolemia patients. However, for chronic heart failure patients, total costs and medical  
29 costs were lower for the 1-19% and 20-39% adherent groups than for the 80-100% adherent groups.  
30  
31  
32  
33  
34  
35  
36  
37  
38  
39

40 Unadjusted costs were measured in six studies with the annual total healthcare costs and/or total  
41 costs of nonadherence ranging from \$1,433 to \$8,377 [58 61 75 82 84 85]. Rizzo et al[58] reported  
42 cost findings through subgroup analysis of five conditions. For all conditions the total healthcare  
43 costs were higher for nonadherent groups compared with adherent. While Zhao et al[75],  
44 categorized participants into adherence subgroups; finding that total healthcare costs were lower  
45 for the nonadherent population. The remaining studies used five key indicators to determine the  
46 economic impact: inpatient costs[61 82], outpatient costs[61 82], pharmacy costs[61 84 85], medical  
47 costs[84 85] and hospitalization costs[84 85].  
48  
49  
50  
51  
52

### 53 **Mental Health**

54  
55  
56 The analyses used to report the economic impact of medication nonadherence in mental health  
57 varied widely. Ten of 13 studies provided a total nonadherence cost estimate in mental health[16 18  
58  
59  
60

1  
2  
3 20 45 52 59 67 80 87 88], with annual cost data being extrapolated for three of these[20 59 88]. Six  
4 studies used adjusted costs, finding that the total annual cost of nonadherence per patient ranged  
5 from \$3,252 to \$19,363 [16 18 52 53 67 80]. Bagalman et al[18] focused primarily on the indirect  
6 costs associated with nonadherence – short-term disability, workers compensation and paid time off  
7 costs – while all other studies addressed direct costs. The main indicators used to measure the direct  
8 economic impact of medication nonadherence were pharmacy costs[16 32 45 52 53 59 67 88],  
9 inpatient costs[32 53 59 87 88], outpatient costs[16 32 52 59 88] and hospitalization costs[15 16 52  
10 88].

11  
12  
13  
14  
15  
16  
17 The total unadjusted cost for medication nonadherence ranged from \$2,512 to \$18,811 as reported  
18 in three studies[45 59 88]. Becker et al[20] used a subgroup analysis to classify patients based on  
19 their adherence level. For every 25% decrement in the rate of adherence (75-100%, 50-74%, 25-49%,  
20 <25%), nonadherence total costs increased. The negligible adherence group (<25%) incurred annual  
21 costs that were \$3,018 more than those of the maximal adherence group (75-100%).

22  
23  
24  
25  
26 Knapp et al[87] outlined the predicted cost of nonadherence with reference to relative impact and  
27 other factors associated with resource use and costs in patients with schizophrenia. Total costs  
28 (\$116,434) were substantially higher than the other two indicators, which were inpatient costs  
29 (\$13,577) and external services costs (\$3,241).

### 30 31 32 33 **Diabetes mellitus:**

34  
35  
36  
37  
38  
39  
40  
41  
42  
43  
44  
45  
46  
47  
48  
49  
50  
51  
52  
53  
54  
55  
56  
57  
58  
59  
60  
Nine studies reported some cost measurement of the impact of medication nonadherence with  
reference to the health system and the individual[33 38 40 44 68 70 81 83 86]. One study estimated  
that the total US cost attributable to nonadherence in diabetes was slightly over \$5 billion[44]. Five  
studies reported the adjusted total healthcare costs and/or total costs with annual costs per patient  
ranging from \$2,741 to \$9,819 [40 44 68 70 86]. One study reported total costs in relation to  
subgroup analysis based on MPR level[68], and another reported total healthcare costs through  
subgroup analysis of commercially insured and Medicare supplemental patients[70].

A further three studies reported unadjusted cost findings[33 81 83] and four studies reported  
unadjusted costs in addition to adjusted values[38 40 68 86]. Unadjusted total healthcare costs  
and/or total costs ranged from \$1,142 to \$7,951. Extrapolated annual costs were determined for  
two studies based on cost data presented [33 83].

The most prominent indicators used to determine costs were pharmacy costs[33 38 40 68 70 86],  
outpatient costs[33 40 70 83 86], inpatient costs[40 70 86] and hospitalization costs[44 81 83]. All  
studies assessed the direct costs associated with medication nonadherence. One study evaluated



1  
2  
3 the relationship between nonadherence and short term disability costs in addition to assessing  
4 direct costs[38].  
5  
6

### 7 **Osteoporosis:**

8  
9 The cost of medication nonadherence in relation to osteoporosis was predominately examined  
10 through analysis of the direct costs associated with nonadherence using total healthcare costs  
11 and/or total costs, inpatient costs, outpatient costs, pharmacy costs and emergency department  
12 costs. Two studies further assessed the economic impact of nonadherence through evaluation of  
13 fracture related costs [41 77]. Four out of 11 studies reported the adjusted cost of medication  
14 nonadherence in addition to reporting unadjusted costs [21 73 74 76]. Three studies further  
15 classified nonadherence through subgroup analysis, with Briesacher et al[21] using MPR 20% interval  
16 increases and the two studies conducted by Zhao et al[73 74] using PDC, with ≥80% classified as high  
17 adherence, 50-79% medium adherence and <50% low adherence . In the studies conducted by Zhao  
18 et al[73 74], total healthcare costs were highest for the medium adherence group (\$41,402 and  
19 \$44,190) followed by the highest adherence group (\$37,553 and \$43,863), and lowest for the low  
20 adherence group (\$34,019 and \$43,771). These annual costs were extrapolated from study data. In  
21 contrast, Briesacher et al[21] modelled the subgroup analyses against the lowest adherence group  
22 (<20% MPR), finding that costs decreased as adherence increased.  
23  
24  
25  
26  
27  
28  
29  
30  
31  
32

33 Overall, the unadjusted total healthcare costs and/or total costs of nonadherence ranged from \$669  
34 to \$43,404. Studies that further classified patients based on subgroups had the wider cost ranges. In  
35 the three studies that reported the lowest level of nonadherence to be PDC <50%, the cost of this  
36 category ranged from \$16,938 to \$43,404 [41 73 74].  
37  
38  
39

40 One study examined only the medical costs of nonadherence through MPR subgroup analysis in  
41 commercial and Medicare supplemental populations. The findings were that, for all levels of  
42 nonadherence, costs of nonadherence were higher for Medicare supplemental patients [39].  
43  
44  
45

### 46 **Respiratory Disease:**

47  
48 All five studies reported the unadjusted cost of medication nonadherence. The methods of  
49 classifying adherence levels varied greatly among them[29 31 46 57 78]. Two studies used MPR[29  
50 57], one the Morisky 4-Item scale[46], one the Global Initiative for Chronic Obstructive Lung Disease  
51 (GOLD) 2007 Guidelines[78] and one a 37 day gap in claims data[31]. Joshi et al[46] reported on the  
52 indirect costs of medication nonadherence through consideration of losses in total productivity  
53 costs, absenteeism costs and presenteeism costs, while all remaining studies examined direct costs.  
54  
55 Delea et al[29] reported a direct relationship between decreases in medication nonadherence level  
56  
57  
58  
59  
60

1  
2  
3 and total costs, whereas Quittner et al[57] reported an inverse relationship between decreases in  
4 medication nonadherence level and total healthcare cost. The total expenses associated with the  
5 lowest subgroup of adherence across all measures ranged from \$804 to \$36,259.  
6  
7

#### 8 **Gastrointestinal Disease:**

9  
10 Three of five studies reported the adjusted annual cost of medication nonadherence per patient  
11 utilizing the MPR method [37 50 65]. Of these, two reported the total cost (\$12,085 and \$37,151)[37  
12 65] with the main contributors to the overall total cost being inpatient costs (22% and 37%),  
13 outpatient costs (57% and 17%) and pharmacy costs (20% and 45%).  
14  
15

16 The remaining two studies utilized infusion rates to assess nonadherence with neither reporting the  
17 total cost nor total healthcare costs[23 47]. Carter et al[23] reported hospitalization costs to be  
18 \$42,854 while Kane et al[47] reported a significantly lower cost at \$5,566 in addition to other direct  
19 cost contributors.  
20  
21

#### 22 **Epilepsy:**

23  
24 Three studies reported the economic impact of medication nonadherence in epilepsy. They all  
25 reported unadjusted costs using an MPR cut off of <80%[28 35 36]. The main economic indicators  
26 used to assess total costs were inpatient costs (\$2,289 to \$6,874), emergency department visit costs  
27 (\$331 to \$669) and pharmacy costs (\$442 to \$1,067). Davis et al[28] modelled the costs of the  
28 nonadherent group against the adherent group. The annual costs reported by Faught et al[36] were  
29 extrapolated from original cost data. The total cost of nonadherence in epilepsy ranged from \$1,866  
30 to \$22,673.  
31  
32

#### 33 **HIV/AIDS:**

34  
35 The economic impact of medication nonadherence for HIV and AIDS patients reported amongst all  
36 three studies was similar [19 25 56]. Two of the three studies examined the costs only for HIV[19  
37 25], while Pruitt et al[56] assessed the cost in AIDS as well as HIV. The total unadjusted costs for  
38 nonadherent HIV patients ranged from \$16,957 to \$30,068 with one study further categorizing  
39 patients with HIV as having either a high viral load or low viral load[19]. The total cost of  
40 nonadherence in AIDS was \$30,523[56]. All studies used comparable indicators (total cost, inpatient  
41 cost, outpatient cost, pharmacy cost) to determine the cost of nonadherence.  
42  
43  
44  
45  
46  
47  
48  
49  
50  
51  
52  
53  
54  
55  
56  
57  
58  
59  
60

**Parkinson's Disease:**

The direct costs associated with Parkinson's disease were assessed in all three studies. The unadjusted total cost ranged from \$10,988 to \$52,023 [27 30 66]. Wei et al[66] further sub-grouped patients into MPR adherence percentage categories, and found that costs increased on all economic indicators (inpatient costs and outpatient costs) as adherence decreased, except for pharmacy costs which decreased with nonadherence. One study additionally reported the adjusted cost, estimating that \$10,290 could be attributed to medication nonadherence annually[30].

**Musculoskeletal Conditions:**

Differing subgroup analyses was used to measure the impact of medication nonadherence on the annual cost incurred by patients. One study assessed both the direct and indirect costs of nonadherence[43], one assessed only the medical costs[63] and one examined the direct costs in commercial and Medicare supplemental patient populations[72]. Zhao et al[72] reported the adjusted annual cost in the commercial population to be \$22,609, and in the Medicare supplemental group, \$28,126. Ivanova et al[43] reported only unadjusted costs and the annual total cost of \$3,408. This figure was extrapolated from study data provided. The main indicators used to evaluate the economic impact of nonadherence were inpatient costs, outpatient costs, pharmacy costs and medical costs. Outpatient costs made the largest contribution to the overall total.

**Cancer:**

Two studies evaluated the effects of medication nonadherence in cancer[26 69]. One study reported total annual costs of \$119,416[69], while the other gave a subgroup analysis based on classified adherence levels[26]. In general the lowest two adherence subgroups (<50% and 50-90%) reported the highest total healthcare costs (\$162,699 and \$67,838). This trend followed for inpatient costs, outpatient costs and other costs, but the reverse relationship was found for pharmacy costs.

**Addiction:**

The adjusted annual total healthcare cost of medication nonadherence was reported as \$53,504[49] while the unadjusted cost ranged from \$29,406 to \$52,213 [49 64]. Leider et al[49] reported the main contributors to this cost to be outpatient costs (\$10,829) and pharmacy costs (\$8,855), whereas Tkacz et al[64] reported them to be inpatient costs (\$28,873 and \$28,407) and outpatient costs (\$15,893 and \$15,460).

**Metabolic conditions other than diabetes mellitus:**

One study measured the influence of medication nonadherence on direct healthcare costs in metabolic conditions, reporting an unadjusted attributable total cost of \$138,525[48]. The economic indicators used to derive this cost were inpatient costs (\$16,192), outpatient costs (\$111,100), emergency department visit costs (\$801) and pharmacy costs (\$3,538).

**Blood conditions:**

Only Candrilli et al[22] reported cost findings on the relationship between nonadherence and healthcare costs, giving an adjusted total cost estimate of \$13,458 for nonadherence classified as MPR <80%.

**All causes:**

In addition to disease-specific studies of the economic impact of medication nonadherence, 28 studies reported the all-causes costs, encompassing cost drivers such as comorbidities. In seven of these studies, annual costs were extrapolated from the original data[24 40 43 54 57 59 88]. Ten studies reported on economic indicators without giving total cost or total healthcare cost[15 38 39 47 48 50 53 75 79 88], and one study reported on costs per episode of nonadherence[79] .

The adjusted cost of medication nonadherence was reported in 10 studies with an estimated range of \$7,808 to \$52,341 [22 24 30 40 52 54 60 65 70 71]. Sokol et al[60] reported the all-cause cost of nonadherence through subgroup analysis of disease states and MPR levels, while Pittman et al[54] reported only using MPR level breakdown.

Fourteen studies reported the unadjusted economic impact of medication nonadherence with an estimated range of \$1,037 to \$53,793 [15 34 39 43 47 48 51 57-59 62 75 79 88]. A further four studies reported adjusted and unadjusted costs[30 38 40 86]. The most frequent indicators used to measure the economic impact were total healthcare costs and/or total costs (71%), pharmacy costs (75%), inpatient costs (46%), outpatient costs (46%), medical costs (28%) and emergency department visit costs (25%).

### 3.5 Meta-Analysis

Statistical analysis was attempted to collate the large collection of results from individual studies for the purpose of integrating the findings on the cost of medication nonadherence. However, the criterion for a meta-analysis could not be met due to the heterogeneity in study design and lack of required statistical parameters in particular standard deviation[89]. Combining studies that differ substantially in design and other factors would have yielded meaningless summary results.

For peer review only

#### 4 Discussion

To our knowledge, this is the first systematic review analyzing the economic impact of medication nonadherence across different disease groups. Medication nonadherence was generally associated with higher healthcare costs. A large variety of outcomes were used to measure the economic impact including total cost or total healthcare cost, pharmacy costs, inpatient costs, outpatient costs, Emergency department costs, medical costs and hospitalization costs.

The costs reported reflect the annual economic impact to the health system per patient. None of the studies estimated broader economic implications such as avoidable costs arising from higher disease prevalence. The majority of studies took the patient or healthcare provider perspective, estimating additional costs associated with nonadherence when compared with adherence. Current literature identifies and quantifies key disease groups that contribute to the economic burden of nonadherence, but no research has attempted to synthesise costs across disease states within major healthcare systems. Comparisons across disease groups would benefit the development of health planning and policy yet prove problematic to interpret due to the varying scope of their inclusion (e.g. mental health vs. parkinsons disease). Similarly there is substantial variation in the differential cost of adherence amongst disease groups with certain diseases requiring greater cost inputs (e.g. cancer and supportive care costs). Further exploration of nonadherence behavior and associated costs is required to adequately quantify the overall cost of nonadherence to healthcare systems as the available data are subject to considerable uncertainty.

Significant differences existed in the range of costs reported within and amongst disease groups. No consistent approach to the estimation of costs or levels of adherence has been established. Many different cost indicators were used, so it is not surprising that cost estimates spanned wide ranges. Prioritization of healthcare interventions to address medication nonadherence is required to address the varying economic impact across disease groups. Determining the range of costs associated with medication nonadherence facilitates the extrapolation of annual national cost estimates attributable to medication nonadherence thus enabling greater planning in terms of health policy to help counteract costs.

The metric of adherence estimation varied substantially within and across disease groups; likely affecting the comparisons between studies. However, Hess et al [90], who compared six key adherence measures on the same study participants, found that the measures produced similar adherence values for all participants, although PDC and continuous measure of medication gaps produced slightly lower values. While this highlights the comparability of the measures of

1  
2  
3 medication nonadherence, it further justifies the need to agree on consistent methods for  
4 estimating nonadherence through use of pharmacy claims data.  
5  
6

7 MPR was the most commonly used measure to estimate medication nonadherence. MPR was used  
8 in 64% of studies, followed by PDC, which was used in 9%. These percentages were consistent with  
9 those found recently by Sattler et al [91]. Even though the measures of medication nonadherence  
10 may be comparable, the definition of MPR and the cut-off points to define nonadherence differed  
11 significantly. Dragomir et al[84] defined MPR as the total days' supply of medication dispensed in the  
12 period, divided by the follow up period, with the assumption of 100% adherence during  
13 hospitalization; Wu et al[70] removed the number of hospitalized days from the calculation; and  
14 Pittman et al[54] calculated the total number of days between the dates of the last filling of a  
15 prescription in the first six months in a given year and the first filling of a prescription in the 365 days  
16 before the last filling. Nonadherence could also be further classified into subcategories within MPR  
17 and PDC based on percentages. Twenty-eight studies defined nonadherence as MPR < 80%, and 19  
18 studies categorized nonadherence into varying percentage subgroups. While Karve et al[92]  
19 validated the empirical basis for selecting 80% as a reasonable cut-off point based on predicting  
20 subsequent hospitalizations in patients across a broad array of chronic diseases, 71 of the 74 studies  
21 included in this review examined more than just hospitalization costs as an indicator metric. Further  
22 research is required to identify and standardise nonadherence thresholds using other outcomes such  
23 as laboratory, productivity and pharmacy measures.  
24  
25  
26  
27  
28  
29  
30  
31  
32  
33  
34

35 Within the 74 studies covered, 30 different indicators were used to measure the cost of  
36 nonadherence and 19 reporting styles were identified. Because of the resultant heterogeneity, a  
37 meta-analysis was impossible. It is imperative that a standardized approach be established to  
38 measure and report the economic impact of medication nonadherence. The core outcome set must  
39 take into consideration the perspective of the intended audience and the proportion of  
40 nonadherence cost that is attributable to each outcome to determine an appropriate model[93]. The  
41 critical indicators based on the findings of this review include total costs, pharmacy costs, inpatient  
42 costs, outpatient costs, emergency department visit costs, medical costs and hospitalization costs for  
43 analysis based on direct costs. For indirect analysis the core outcomes include short term disability  
44 costs, workers compensation costs, paid time off costs, absenteeism costs and productivity costs.  
45 We suggest that further analysis of the contribution of each outcome to the overall cost of  
46 nonadherence be undertaken to help develop a tool that can be utilized for future research.  
47  
48  
49  
50  
51  
52  
53  
54

55 Many studies have examined the relationship between nonadherence and economic outcomes using  
56 a cross-sectional analysis[44]. The implications of this are that potentially crucial confounders such  
57  
58  
59  
60

1  
2  
3 as baseline status are ignored. In addition, a cross-sectional analysis may obscure temporality: for  
4 example, did greater adherence result in reduced costs and improved health outcomes, or was the  
5 patient healthier initially and more capable of being adherent? A longitudinal design is needed to  
6 overcome this limitation.  
7  
8

9  
10 None of the studies included a full economic evaluation. An economic evaluation requires a  
11 comparison of two or more alternative courses of action, while considering both the inputs and  
12 outputs associated with each[13]. While none of the studies taken separately could inform a choice  
13 between alternative courses of action, they did provide key evidence for decision makers about  
14 costs associated with medication nonadherence. Pharmacy claims data were utilized by the majority  
15 of studies to model cost estimates. Three-quarters of the studies were classified as cost  
16 descriptions, providing a cost or outcome overview of the health consequences associated with  
17 nonadherence. Ten studies garnered a high quality classification, potentially limiting the overall  
18 conclusions that are able to be drawn and emphasised the need for future study design to  
19 incorporate elements allowing full economic evaluations to be conducted. Hughes et al[94]  
20 highlighted the need for more information on the consequences of nonadherence, so that economic  
21 evaluations could reflect the potential long-term effect of this growing problem.  
22  
23  
24  
25  
26  
27  
28  
29

30 Due to the advances in technology available to record and assess medication nonadherence, the  
31 inclusion of studies undertaken in the late 1990s and early 2000s may have affected the  
32 comparability of results, despite the fact that these studies met the inclusion criteria[15 16 58 67 68  
33 87]. The quality of data presents a limitation. Information on disease groups with fewer included  
34 studies may be less reliable than information on those with more. However, our findings affirm the  
35 pattern of association between nonadherence and increasing healthcare costs.  
36  
37  
38  
39  
40  
41  
42  
43  
44  
45  
46  
47  
48  
49  
50  
51  
52  
53  
54  
55  
56  
57  
58  
59  
60



## 5 Conclusion

Medication nonadherence places a significant cost burden on healthcare systems. However differences in methodological strategies make the comparison amongst studies challenging and reduce the ability for the true economic magnitude of the problem to be expressed in a meaningful manner. Further research is required to develop a streamlined approach to classify patient adherence. An economic model that adequately depicts the current landscape of the nonadherence problem using key economic indicators could help to stratify costs and inform key policy and decision makers. Utilisation of existing data could help to better define costs and provide valuable input into the development of an economic model to standardise the economic impact of medication nonadherence.

## 6 Footnotes

**Contributors:** RC, VGC, SB, FFL and MF conceived the paper. RC and VGC performed all the data extraction and quality assessment. RC drafted the initial form and all revisions of this manuscript. All other authors (RC, VGC, SB, FFL, MF) made significant contributions to the manuscript and read and modified the drafts. All authors read and approved the final manuscript.

**Funding:** This research received no specific grant from any funding agency in the public, commercial or not-for-profit sectors.

**Competing interests:** None declared

**Data sharing statement:** All data from systematic review available in paper and supplementary material.

**Acknowledgement:** RC research is supported by an Australian Government Research Training Program Scholarship.

1. Centres for Disease Control and Prevention. Chronic Disease Prevention and Health Promotion. Available from: <http://www.cdc.gov/chronicdisease/overview> Accessed June 24, 2016. .
2. World Health Organisation, National Institute of Aging, National Institute of Health and US Department of Health and Human Services. Global Health and Ageing. Published October 2011. Available from: [http://www.who.int/ageing/publications/global\\_health.pdf](http://www.who.int/ageing/publications/global_health.pdf) Accessed June 24, 2016.
3. Horne R WJ, Barber N, Elliot R, Morgan M. Concordance, adherence and compliance in medicine taking. Report for the National Coordinating Centre for NHS Service Delivery and Organization R & D (NCCSDO). 2005
4. World Health Organisation. Adherence to Long Term Therapies; Evidence for Action. Published 2003. Available from: [http://www.who.int/chp/knowledge/publications/adherence\\_full\\_report.pdf?ua=1](http://www.who.int/chp/knowledge/publications/adherence_full_report.pdf?ua=1). Accessed November 6, 2015.
5. New England Healthcare Institute. Thinking outside the pillbox: a system-wide approach to improving patient medication adherence for chronic disease. Published August 2009. Available from: [http://www.nehi.net/publications/44/thinking\\_outside\\_the\\_pillbox\\_a\\_systemwide\\_approach\\_to\\_improving\\_patient\\_medication\\_adherence\\_for\\_chronic\\_disease](http://www.nehi.net/publications/44/thinking_outside_the_pillbox_a_systemwide_approach_to_improving_patient_medication_adherence_for_chronic_disease). Accessed June 24, 2016.
6. Pharmaceutical Group of the European Union. Targeting adherence. Improving patient outcomes in Europe through community pharmacists' intervention. Published May 2008. Available from: <http://www.pgeu.eu/policy/5-adherence.html>. Accessed January 28, 2016..
7. IMS Institute for Healthcare Informatics. Advancing the responsible use of medicines; applying levers for change. Published October 2012. Available from: <http://pharmanalyses.fr/wp-content/uploads/2012/10/Advancing-Responsible-Use-of-Meds-Report-01-10-12.pdf>. Accessed March 10, 2016. .
8. AIHW 2016. Health expenditure Australia 2014–15. Health and welfare expenditure series no. 57. Cat. no. HWE 67. Canberra: AIHW.
9. Australian Department of Health and Ageing. PriceWaterhouseCoopers. Evaluation of the DAA/PMP Programs. Published June 2010. Available from: [https://www.health.gov.au/internet/main/publishing.nsf/Content/F520A0D5EDEA0172CA257BF0001D7B4D/\\$File/DAA%20PMP%20Report.pdf](https://www.health.gov.au/internet/main/publishing.nsf/Content/F520A0D5EDEA0172CA257BF0001D7B4D/$File/DAA%20PMP%20Report.pdf) Accessed June 24, 2016.
10. Moher D, Liberati A, Tetzlaff J, et al. Preferred reporting items for systematic reviews and meta-analyses: the PRISMA statement. *Annals of internal medicine* 2009;**151**(4):264-9, w64
11. Higgins JPT, Green S (editors). *Cochrane Handbook for Systematic Reviews of Interventions* Version 5.1.0 [updated March 2011]. The Cochrane Collaboration, 2011. [www.cochrane-handbook.org](http://www.cochrane-handbook.org).
12. Shemilt I, Thomas J, Morciano M. A web-based tool for adjusting costs to a specific target currency and price year. *Evidence & Policy: A Journal of Research, Debate and Practice* 2010;**6**(1):51-59
13. Drummond MF, Sculpher MJ, Claxton K, et al. *Methods for the economic evaluation of health care programmes*: Oxford university press, 2015.
14. Drummond MF, Jefferson TO. Guidelines for authors and peer reviewers of economic submissions to the BMJ. The BMJ Economic Evaluation Working Party. *Bmj* 1996;**313**(7052):275-83
15. Svarstad BL, Shireman TI, Sweeney JK. Using drug claims data to assess the relationship of medication adherence with hospitalization and costs. *Psychiatric services (Washington, DC)* 2001;**52**:805-11
16. Gilmer TP, Dolder CR, Lacro JP, et al. Adherence to treatment with antipsychotic medication and health care costs among Medicaid beneficiaries with schizophrenia. *The American journal of psychiatry* 2004;**161**:692-9

17. Aubert RE, Yao J, Xia F, et al. Is there a relationship between early statin compliance and a reduction in healthcare utilization? *The American journal of managed care* 2010;**16**:459-66
18. Bagalman E, Yu-Isenberg KS, Durden E, et al. Indirect costs associated with nonadherence to treatment for bipolar disorder. *Journal of occupational and environmental medicine / American College of Occupational and Environmental Medicine* 2010;**52**:478-85 doi: 10.1097/JOM.0b013e3181db811d.
19. Barnett PG, Chow A, Joyce VR, et al. Determinants of the Cost of Health Services Used by Veterans With HIV. *Medical care* 2011;**49**:848-56 doi: 10.1097/MLR.0b013e31821b34c0.
20. Becker MA, Young MS, Ochshorn E, et al. The relationship of antipsychotic medication class and adherence with treatment outcomes and costs for Florida Medicaid beneficiaries with schizophrenia. *Administration and policy in mental health* 2007;**34**:307-14 doi: 10.1007/s10488-006-0108-5.
21. Briesacher BA, Andrade SE, Yood RA, et al. Consequences of poor compliance with bisphosphonates. *Bone* 2007;**41**:882-7 doi: 10.1016/j.bone.2007.07.009.
22. Candrilli SD, O'Brien SH, Ware RE, et al. Hydroxyurea adherence and associated outcomes among Medicaid enrollees with sickle cell disease. *American journal of hematology* 2011;**86**:273-7 doi: 10.1002/ajh.21968.
23. Carter CT, Waters HC, Smith DB. Impact of infliximab adherence on Crohn's disease-related healthcare utilization and inpatient costs. *Advances in therapy* 2011;**28**:671-83 doi: 10.1007/s12325-011-0048-7.
24. Casciano JP, Dotiwala ZJ, Martin BC, et al. The costs of warfarin underuse and nonadherence in patients with atrial fibrillation: a commercial insurer perspective. *Journal of managed care pharmacy : JMCP* 2013;**19**:302-16
25. Cooke CE, Lee HY, Xing S. Adherence to antiretroviral therapy in managed care members in the United States: a retrospective claims analysis. *Journal of managed care pharmacy : JMCP* 2014;**20**:86-92
26. Darkow T, Henk HJ, Thomas SK, et al. Treatment interruptions and non-adherence with imatinib and associated healthcare costs: a retrospective analysis among managed care patients with chronic myelogenous leukaemia. *PharmacoEconomics* 2007;**25**:481-96
27. Davis KL, Edin HM, Allen JK. Prevalence and cost of medication nonadherence in Parkinson's disease: evidence from administrative claims data. *Movement disorders : official journal of the Movement Disorder Society* 2010;**25**(4):474-80 doi: 10.1002/mds.22999.
28. Davis KLC, S. D.; Edin, H. M. Prevalence and cost of nonadherence with antiepileptic drugs in an adult managed care population. *Epilepsia* 2008;**49**(3):446-54 doi: 10.1111/j.1528-1167.2007.01414.x.
29. Delea TE, Stanford RH, Hagiwara M, et al. Association between adherence with fixed dose combination fluticasone propionate/salmeterol on asthma outcomes and costs\*. *Current medical research and opinion* 2008;**24**:3435-42 doi: 10.1185/03007990802557344.
30. Delea TE, Thomas SK, Hagiwara M. The association between adherence to levodopa/carbidopa/entacapone therapy and healthcare utilization and costs among patients with Parkinson's disease: a retrospective claims-based analysis. *CNS drugs* 2011;**25**:53-66 doi: 10.2165/11538970-000000000-00000.
31. Diehl JL, Daw JR, Coley KC, et al. Medical utilization associated with palivizumab compliance in a commercial and managed medicaid health plan. *Journal of managed care pharmacy : JMCP* 2010;**16**:23-31
32. Eaddy M, Grogg A, Locklear J. Assessment of compliance with antipsychotic treatment and resource utilization in a Medicaid population. *Clinical therapeutics* 2005;**27**:263-72 doi: 10.1016/j.clinthera.2005.02.003.
33. Egede LE, Gebregziabher M, Dismuke CE, et al. Medication Nonadherence in Diabetes: Longitudinal effects on costs and potential cost savings from improvement. *Diabetes care* 2012;**35**:2533-39 doi: 10.2337/dc12-0572.

- 1  
2  
3 34. Eisenberg DF, Placzek H, Gu T, et al. Cost and consequences of noncompliance to oral  
4 bisphosphonate treatment. *Journal of managed care & specialty pharmacy* 2015;**21**(1):56-65  
5 doi: 10.18553/jmcp.2015.21.1.56.
- 6 35. Ettinger AB, Manjunath R, Candrilli SD, et al. Prevalence and cost of nonadherence to  
7 antiepileptic drugs in elderly patients with epilepsy. *Epilepsy & behavior : E&B* 2009;**14**:324-  
8 9 doi: 10.1016/j.yebeh.2008.10.021.
- 10 36. Fought RE, Weiner JR, Guérin A, et al. Impact of nonadherence to antiepileptic drugs on health  
11 care utilization and costs: findings from the RANSOM study. *Epilepsia* 2009;**50**:501-9 doi:  
12 10.1111/j.1528-1167.2008.01794.x.
- 13 37. Gosselin A, Luo R, Lohoues H, et al. The impact of proton pump inhibitor compliance on health-  
14 care resource utilization and costs in patients with gastroesophageal reflux disease. *Value in*  
15 *health : the journal of the International Society for Pharmacoeconomics and Outcomes*  
16 *Research* 2009;**12**:34-9 doi: 10.1111/j.1524-4733.2008.00399.x.
- 17 38. Hagen SE, Wright DW, Finch R, et al. Impact of compliance to oral hypoglycemic agents on short-  
18 term disability costs in an employer population. *Population health management* 2014;**17**:35-  
19 41 doi: 10.1089/pop.2013.0009.
- 20 39. Halpern R, Becker L, Iqbal SU, et al. The association of adherence to osteoporosis therapies with  
21 fracture, all-cause medical costs, and all-cause hospitalizations: a retrospective claims  
22 analysis of female health plan enrollees with osteoporosis. *Journal of managed care*  
23 *pharmacy : JMCP* 2011;**17**:25-39
- 24 40. Hansen RA, Farley JF, Droege M, et al. A retrospective cohort study of economic outcomes and  
25 adherence to monotherapy with metformin, pioglitazone, or a sulfonylurea among patients  
26 with type 2 diabetes mellitus in the United States from 2003 to 2005. *Clinical therapeutics*  
27 2010;**32**:1308-19 doi: 10.1016/j.clinthera.2010.07.011.
- 28 41. Hazel-Fernandez L, Louder AM, Foster SA, et al. Association of teriparatide adherence and  
29 persistence with clinical and economic outcomes in Medicare Part D recipients: a  
30 retrospective cohort study. *BMC musculoskeletal disorders* 2013;**14**:4 doi: 10.1186/1471-  
31 2474-14-4.
- 32 42. Huybrechts KF, Ishak KJ, Caro JJ. Assessment of compliance with osteoporosis treatment and its  
33 consequences in a managed care population. *Bone* 2006;**38**:922-8 doi:  
34 10.1016/j.bone.2005.10.022.
- 35 43. Ivanova JI, Bergman RE, Birnbaum HG, et al. Impact of medication adherence to disease-  
36 modifying drugs on severe relapse, and direct and indirect costs among employees with  
37 multiple sclerosis in the US. *Journal of medical economics* 2012;**15**:601-9 doi:  
38 10.3111/13696998.2012.667027.
- 39 44. Jha AK, Aubert RE, Yao J, et al. Greater adherence to diabetes drugs is linked to less hospital use  
40 and could save nearly \$5 billion annually. *Health affairs (Project Hope)* 2012;**31**:1836-46 doi:  
41 10.1377/hlthaff.2011.1198.
- 42 45. Jiang Y, Ni W. Estimating the Impact of Adherence to and Persistence with Atypical Antipsychotic  
43 Therapy on Health Care Costs and Risk of Hospitalization. *Pharmacotherapy* 2015;**35**(9):813-  
44 22 doi: 10.1002/phar.1634.
- 45 46. Joshi AV, Madhavan SS, Ambegaonkar A, et al. Association of medication adherence with  
46 workplace productivity and health-related quality of life in patients with asthma. *The Journal*  
47 *of asthma : official journal of the Association for the Care of Asthma* 2006;**43**:521-6 doi:  
48 10.1080/02770900600857010.
- 49 47. Kane SV, Chao J, Mulani PM. Adherence to infliximab maintenance therapy and health care  
50 utilization and costs by Crohn's disease patients. *Advances in therapy* 2009;**26**:936-46 doi:  
51 10.1007/s12325-009-0069-7.
- 52 48. Lee A, Song X, Khan I, et al. Association of cinacalcet adherence and costs in patients on dialysis.  
53 *Journal of medical economics* 2011;**14**:798-804 doi: 10.3111/13696998.2011.627404.
- 54  
55  
56  
57  
58  
59  
60

- 1
- 2
- 3 49. Leider HL, Dhaliwal J, Davis EJ, et al. Healthcare costs and nonadherence among chronic opioid
- 4 users. *The American journal of managed care* 2011;**17**:32-40
- 5 50. Mitra D, Hodgkins P, Yen L, et al. Association between oral 5-ASA adherence and health care
- 6 utilization and costs among patients with active ulcerative colitis. *BMC gastroenterology*
- 7 2012;**12**:132 doi: 10.1186/1471-230X-12-132.
- 8 51. Modi A, Siris ES, Tang J, et al. Cost and consequences of noncompliance with osteoporosis
- 9 treatment among women initiating therapy. *Current medical research and opinion*
- 10 2015;**31**(4):757-65 doi: 10.1185/03007995.2015.1016605.
- 11 52. Offord S, Lin J, Mirski D, et al. Impact of early nonadherence to oral antipsychotics on clinical and
- 12 economic outcomes among patients with schizophrenia. *Advances in therapy* 2013;**30**:286-
- 13 97 doi: 10.1007/s12325-013-0016-5.
- 14 53. Offord S, Lin J, Wong B, et al. Impact of oral antipsychotic medication adherence on healthcare
- 15 resource utilization among schizophrenia patients with Medicare coverage. *Community*
- 16 *mental health journal* 2013;**49**:625-9 doi: 10.1007/s10597-013-9638-y.
- 17 54. Pittman DG, Chen W, Bowlin SJ, et al. Adherence to statins, subsequent healthcare costs, and
- 18 cardiovascular hospitalizations. *The American journal of cardiology* 2011;**107**:1662-6 doi:
- 19 10.1016/j.amjcard.2011.01.052.
- 20 55. Pittman DG, Tao Z, Chen W, et al. Antihypertensive medication adherence and subsequent
- 21 healthcare utilization and costs. *The American journal of managed care* 2010;**16**:568-76
- 22 56. Pruitt Z, Robst J, Langland-Orban B, et al. Healthcare costs associated with antiretroviral
- 23 adherence among medicaid patients. *Applied health economics and health policy*
- 24 2015;**13**:69-80 doi: 10.1007/s40258-014-0138-1.
- 25 57. Quittner AL, Zhang J, Marynchenko M, et al. Pulmonary medication adherence and health-care
- 26 use in cystic fibrosis. *Chest* 2014;**146**:142-51 doi: 10.1378/chest.13-1926
- 27 58. Rizzo JAS, W. R. Variations in compliance among hypertensive patients by drug class: implications
- 28 for health care costs. *Clinical therapeutics* 1997;**19**(6):1446-57; discussion 24-5
- 29 59. Robinson RL, Long SR, Chang S, et al. Higher costs and therapeutic factors associated with
- 30 adherence to NCQA HEDIS antidepressant medication management measures: analysis of
- 31 administrative claims. *Journal of managed care pharmacy : JMCP* 2006;**12**:43-54
- 32 60. Sokol MC, McGuigan KA, Verbrugge RR, et al. Impact of medication adherence on hospitalization
- 33 risk and healthcare cost. *Medical care* 2005;**43**:521-30
- 34 61. Stroupe KT, Teal EY, Tu W, et al. Association of Refill Adherence and Health Care Use Among
- 35 Adults with Hypertension in an Urban Health Care System. *Pharmacotherapy* 2006;**26**:779-
- 36 89 doi: 10.1592/phco.26.6.779.
- 37 62. Sunycz JA, Mucha L, Baser O, et al. Impact of compliance and persistence with bisphosphonate
- 38 therapy on health care costs and utilization. *Osteoporosis international : a journal*
- 39 *established as result of cooperation between the European Foundation for Osteoporosis and*
- 40 *the National Osteoporosis Foundation of the USA* 2008;**19**:1421-9 doi: 10.1007/s00198-008-
- 41 0586-2.
- 42 63. Tan H, Cai Q, Agarwal S, et al. Impact of adherence to disease-modifying therapies on clinical and
- 43 economic outcomes among patients with multiple sclerosis. *Advances in therapy*
- 44 2011;**28**:51-61 doi: 10.1007/s12325-010-0093-7.
- 45 64. Tkacz J, Volpicelli J, Un H, et al. Relationship between buprenorphine adherence and health
- 46 service utilization and costs among opioid dependent patients. *Journal of substance abuse*
- 47 *treatment* 2014;**46**:456-62 doi: 10.1016/j.jsat.2013.10.014.
- 48 65. Wan GJ, Kozma CM, Slaton TL, et al. Inflammatory bowel disease: healthcare costs for patients
- 49 who are adherent or non-adherent with infliximab therapy. *Journal of medical economics*
- 50 2014;**17**:384-93 doi: 10.3111/13696998.2014.909436.
- 51 66. Wei Y-J, Palumbo FB, Simoni-Wastila L, et al. Antiparkinson drug adherence and its association
- 52 with health care utilization and economic outcomes in a Medicare Part D population. *Value*
- 53
- 54
- 55
- 56
- 57
- 58
- 59
- 60

- 1  
2  
3 in health : the journal of the International Society for Pharmacoeconomics and Outcomes  
4 Research 2014;**17**:196-204 doi: 10.1016/j.jval.2013.12.003.
- 5 67. White TJV, Ann; Ory, Caron; Dezii, Christopher M.; Chang, Eunice. Economic Impact of Patient  
6 Adherence with Antidepressant Therapy Within a Managed Care Organization. Disease  
7 Management & Health Outcomes 2003;**11**(12):817-22 doi: 10.2165/00115677-200311120-  
8 00006.
- 9 68. White TJV, Ann; Chang, Eunice; Dezii, Christopher M.; Abrams, Geoffrey D. The Costs of Non-  
10 Adherence to Oral Antihyperglycemic Medication in Individuals with Diabetes Mellitus and  
11 Concomitant Diabetes Mellitus and Cardiovascular Disease in a Managed Care Environment.  
12 Disease Management & Health Outcomes 2004;**12**(3):181-88 doi: 10.2165/00115677-  
13 200412030-00004.
- 14 69. Wu EQ, Johnson S, Beaulieu N, et al. Healthcare resource utilization and costs associated with  
15 non-adherence to imatinib treatment in chronic myeloid leukemia patients. Current medical  
16 research and opinion 2010;**26**:61-69 doi: 10.1185/03007990903396469.
- 17 70. Wu J, Seiber E, Lacombe VA, et al. Medical utilization and costs associated with statin adherence  
18 in Medicaid enrollees with type 2 diabetes. The Annals of pharmacotherapy 2011;**45**:342-9  
19 doi: 10.1345/aph.1P539.
- 20 71. Wu N, Chen S, Boulanger L, et al. Duloxetine compliance and its association with healthcare costs  
21 among patients with diabetic peripheral neuropathic pain. Journal of medical economics  
22 2009;**12**:192-202 doi: 10.3111/13696990903240559.
- 23 72. Zhao Y, Chen S-Y, Wu N, et al. Medication Adherence and Healthcare Costs among Fibromyalgia  
24 Patients Treated with Duloxetine. Pain Practice 2011;**11**:381-91 doi: 10.1111/j.1533-  
25 2500.2010.00431.x.
- 26 73. Zhao Y, Johnston SS, Smith DM, et al. Association between teriparatide adherence and  
27 healthcare utilization and costs among hip fracture patients in the United States. Bone  
28 2014;**60**:221-6 doi: 10.1016/j.bone.2013.12.016.
- 29 74. Zhao Y, Johnston SS, Smith DM, et al. Association between teriparatide adherence and  
30 healthcare utilization and costs in real-world US kyphoplasty/vertebroplasty patients.  
31 Osteoporosis International 2013;**24**:2525-33 doi: 10.1007/s00198-013-2324-7.
- 32 75. Zhao Y, Zabriski S, Bertram C. Associations between statin adherence level, health care costs, and  
33 utilization. Journal of managed care & specialty pharmacy 2014;**20**:703-13
- 34 76. Kjellberg J, Jorgensen AD, Vestergaard P, et al. Cost and health care resource use associated with  
35 noncompliance with oral bisphosphonate therapy: an analysis using Danish health registries.  
36 Osteoporosis International 2016;**27**(12):3535-41 doi: 10.1007/s00198-016-3683-7.
- 37 77. Olsen KR, Hansen C, Abrahamsen B. Association between refill compliance to oral  
38 bisphosphonate treatment, incident fractures, and health care costs--an analysis using  
39 national health databases. Osteoporosis international : a journal established as result of  
40 cooperation between the European Foundation for Osteoporosis and the National  
41 Osteoporosis Foundation of the USA 2013;**24**:2639-47 doi: 10.1007/s00198-013-2365-y.
- 42 78. Miravittles M, Sicras A, Crespo C, et al. Costs of chronic obstructive pulmonary disease in relation  
43 to compliance with guidelines: a study in the primary care setting. Therapeutic advances in  
44 respiratory disease 2013;**7**:139-50 doi: 10.1177/1753465813484080.
- 45 79. Alvarez Payero M, Martinez Lopez de Castro N, Ucha Samartin M, et al. Medication non-  
46 adherence as a cause of hospital admissions. Farmacia hospitalaria : organo oficial de  
47 expresion cientifica de la Sociedad Espanola de Farmacia Hospitalaria 2014;**38**(4):328-33 doi:  
48 10.7399/fh.2014.38.4.7660.
- 49 80. Joe S, Lee JS. Association between non-compliance with psychiatric treatment and non-  
50 psychiatric service utilization and costs in patients with schizophrenia and related disorders.  
51 BMC psychiatry 2016;**16**(1):444 doi: 10.1186/s12888-016-1156-3.
- 52 81. Hong JS, Kang HC. Relationship between oral antihyperglycemic medication adherence and  
53 hospitalization, mortality, and healthcare costs in adult ambulatory care patients with type 2  
54  
55  
56  
57  
58  
59  
60

- 1  
2  
3 diabetes in South Korea. *Medical care* 2011;**49**:378-84 doi:  
4 10.1097/MLR.0b013e31820292d1.
- 5 82. Dilokthornsakul P, Chaiyakunapruk N, Nimpitakpong P, et al. The Effects of Medication Supply on  
6 Hospitalizations and Health-Care Costs in Patients with Chronic Heart Failure. *Value in Health*  
7 2012;**15**:S9-S14 doi: 10.1016/j.jval.2011.11.019.
- 8 83. An S-Y, Kim HJ, Chun KH, et al. Clinical and economic outcomes in medication-adherent and -  
9 nonadherent patients with type 2 diabetes mellitus in the Republic of Korea. *Clinical*  
10 *therapeutics* 2014;**36**:245-54 doi: 10.1016/j.clinthera.2013.12.012.
- 11 84. Dragomir A, Cote R, White M, et al. Relationship between adherence level to statins, clinical  
12 issues and health-care costs in real-life clinical setting. *Value in health : the journal of the*  
13 *International Society for Pharmacoeconomics and Outcomes Research* 2010;**13**(1):87-94 doi:  
14 10.1111/j.1524-4733.2009.00583.x.
- 15 85. Dragomir A, Côté R, Roy L, et al. Impact of adherence to antihypertensive agents on clinical  
16 outcomes and hospitalization costs. *Medical care* 2010;**48**:418-25 doi:  
17 10.1097/MLR.0b013e3181d567bd.
- 18 86. Gentil L, Vasiliadis HM, Preville M, et al. Adherence to Oral Antihyperglycemic Agents Among  
19 Older Adults With Mental Disorders and Its Effect on Health Care Costs, Quebec, Canada,  
20 2005-2008. *Preventing chronic disease* 2015;**12**:E230 doi: 10.5888/pcd12.150412.
- 21 87. Knapp M, King D, Pugner K, et al. Non-adherence to antipsychotic medication regimens:  
22 associations with resource use and costs. *The British journal of psychiatry : the journal of*  
23 *mental science* 2004;**184**:509-16
- 24 88. Hong J, Reed C, Novick D, et al. Clinical and economic consequences of medication non-  
25 adherence in the treatment of patients with a manic/mixed episode of bipolar disorder:  
26 results from the European Mania in Bipolar Longitudinal Evaluation of Medication (EMBLEM)  
27 study. *Psychiatry research* 2011;**190**:110-4 doi: 10.1016/j.psychres.2011.04.016.
- 28 89. Deeks JJ, Higgins JPT, Altman DG (editors). *Cochrane Handbook for Systematic Reviews of*  
29 *Interventions Version 5.1.0 [updated March 2011]. The Cochrane Collaboration, 2011.*  
30 [www.cochrane-handbook.org](http://www.cochrane-handbook.org).
- 31 90. Hess LM, Raebel MA, Conner DA, et al. Measurement of adherence in pharmacy administrative  
32 databases: a proposal for standard definitions and preferred measures. *The Annals of*  
33 *pharmacotherapy* 2006;**40**(7-8):1280-88 doi: 10.1345/aph.1H018.
- 34 91. Sattler EL, Lee JS, Perri M, 3rd. Medication (re)fill adherence measures derived from pharmacy  
35 claims data in older Americans: a review of the literature. *Drugs & aging* 2013;**30**(6):383-99  
36 doi: 10.1007/s40266-013-0074-z.
- 37 92. Karve S, Cleves MA, Helm M, et al. An empirical basis for standardizing adherence measures  
38 derived from administrative claims data among diabetic patients. *Medical care*  
39 2008;**46**(11):1125-33 doi: 10.1097/MLR.0b013e31817924d2.
- 40 93. Gargon E, Williamson PR, Altman DG, et al. The COMET Initiative database: progress and  
41 activities from 2011 to 2013. *Trials* 2014;**15**:279 doi: 10.1186/1745-6215-15-279.
- 42 94. Hughes DA, Bagust A, Haycox A, et al. Accounting for noncompliance in pharmacoeconomic  
43 evaluations. *Pharmacoeconomics* 2001;**19**(12):1185-97
- 44  
45  
46  
47  
48  
49  
50  
51  
52  
53  
54  
55  
56  
57  
58  
59  
60



Table 1: Studies identified with costs reported by adherence level and disease state

| Author, Year, Country                                | Objective                                                                                                                                                                             | Study Characteristics                                                                                                                                       | Adherence (as reported in paper)                                                                                                                      | Outcomes/ Indicators                                                                  | Results (USD, 2015)                                                                                                                                                                                                                                                   | Quality                                                           |
|------------------------------------------------------|---------------------------------------------------------------------------------------------------------------------------------------------------------------------------------------|-------------------------------------------------------------------------------------------------------------------------------------------------------------|-------------------------------------------------------------------------------------------------------------------------------------------------------|---------------------------------------------------------------------------------------|-----------------------------------------------------------------------------------------------------------------------------------------------------------------------------------------------------------------------------------------------------------------------|-------------------------------------------------------------------|
| <b>Cardiovascular Disease</b>                        |                                                                                                                                                                                       |                                                                                                                                                             |                                                                                                                                                       |                                                                                       |                                                                                                                                                                                                                                                                       |                                                                   |
| <i>Aubert et al</i> [1]<br>2010<br>US                | To investigate whether compliance during the first 2 years of statin therapy is associated with reduced hospitalization rates and direct medical costs during year 3.                 | <u>Design:</u> Retrospective cohort study<br><u>Follow Up:</u> 3 years<br><u>Sample Size:</u> 10227 (A:3512, NA:6715)                                       | <u>Measure:</u> MPR<br><u>Classification:</u> MPR < 80 = non-compliant<br><u>Method of Assessment:</u> pharmacy claims data                           | Total Healthcare costs<br>Medical Costs                                               | <u>Type of Costs:</u> adjusted<br><u>Classification:</u> disease state specific<br><u>Currency Year:</u> USD, 2002<br><u>Cost of Nonadherence:</u> THC:\$5289.61 (\$6865.90), MC:\$4908.09 (\$6370.60)                                                                | <u>Quality:</u> medium<br><u>Classification:</u> cost description |
| <i>Casciano et al</i> [2]<br>2013<br>US              | To assess the economic burden of underuse and nonadherence of warfarin therapy among patients with non-valvular atrial fibrillation in a commercially insured population.             | <u>Design:</u> Retrospective, observational, quasi-experimental study<br><u>Follow Up:</u> 18months<br><u>Sample Size:</u> 13289 (A:2852, NA:4184, NE:6253) | <u>Measure:</u> PDC<br><u>Classification:</u> PDC <80 = low adherence , 0 = no warfarin exposure<br><u>Method of Assessment:</u> pharmacy claims data | Total Costs<br>Inpatient Costs<br>Outpatient Costs<br>Pharmacy Costs<br>Medical Costs | <u>Type of Costs:</u> adjusted<br><u>Classification:</u> all cause<br><u>Currency Year:</u> USD, 2005<br><u>Cost of Nonadherence*:</u> TC:\$16612.44(\$19936.70), IC:\$9382.56 (\$11260.10), OC:\$8605.92 (\$10328), PC:\$2388.24 (\$2866.20), MC:\$15235.80(\$18285) | <u>Quality:</u> medium<br><u>Classification:</u> cost description |
| <i>Dilokthornsakul et al</i> [3]<br>2012<br>Thailand | To determine the effects of medication supplies on healthcare costs and hospitalizations in patients with chronic heart failure receiving angiotensin converting enzyme inhibitors or | <u>Design:</u> Retrospective cohort study<br><u>Follow Up:</u> 1 year<br><u>Sample Size:</u> 393 (A:168, NA:219, OA:6)                                      | <u>Measure:</u> MPR<br><u>Classification:</u> MPR < 80 = undersupply, MPR >120 = oversupply<br><u>Method of Assessment:</u> pharmacy claims data      | Total Healthcare Costs<br>Inpatient Costs<br>Outpatient Costs                         | <u>Type of Costs:</u> unadjusted<br><u>Classification:</u> disease state specific<br><u>Currency Year:</u> USD, 2004<br><u>Cost of Nonadherence:</u> THC:\$1157 (\$1433.06), IC:\$1019 (\$1262.13), OC:\$138 (\$170.93)                                               | <u>Quality:</u> high<br><u>Classification:</u> cost description   |

angiotensin receptor blockers.

*Dragomir et al*[4]  
2010  
Canada

To evaluate the impact of low adherence to antihypertensive agents on cardiovascular outcomes and hospitalization costs.

Design: Retrospective cohort study  
Follow Up: 3 years  
Sample Size: 56896 (A:38217, NA:18679)

Measure: MPR  
Classification: MPR≥80 = adherent, MPR < 80 = nonadherent  
Method of Assessment: pharmacy claims data

Total Healthcare Costs  
Pharmacy Costs  
Medical Costs  
Hospitalization Costs

Type of Costs: unadjusted and predicted  
Classification: disease state specific and hospitalised patients  
Currency Year: CAD, 2006  
Cost of Nonadherence: Unadjusted Disease state specific: THC:\$7165 (\$6900.87), PC: \$1800 (\$1733.64), MC: \$1370 (\$1319.50), HC: \$3995 (\$3847.73)

Quality: medium  
Classification: cost description

Unadjusted Hospitalised patients:  
THC: \$17397 (\$16755.67), PC:\$2685 (\$2586.02), MC:\$2608 (\$2511.86), HC: \$12104 (\$11657.79)  
Predicted disease state specific:  
HC:\$3877 (\$3734.08)  
Predicted hospitalised patient:  
HC:\$11715 (\$11283.13)

*Dragomir et al*[5]  
2010  
Canada

To evaluate the impact of low adherence to statins on clinical issues and direct healthcare costs.

Design: Retrospective cohort study  
Follow Up: 3 years  
Sample Size: 55134 (A:28549, NA:26585)

Measure: MPR  
Classification: MPR≥80 = adherent, MPR < 80 = nonadherent  
Method of Assessment: pharmacy claims data

Total Healthcare Costs  
Pharmacy Costs  
Medical Costs  
Hospitalization Costs

Type of Costs: unadjusted and predicted  
Classification: disease state specific and hospitalised patients  
Currency Year: CAD, 2005  
Cost of Nonadherence: Unadjusted Disease state specific:  
THC:\$6243 (\$6175.76), PC:\$2506 (\$2479.01), MC:\$1241 (\$1227.63), HC:\$2496 (\$2469.12)

Quality: medium  
Classification: cost description

Unadjusted Hospitalised patients:  
THC:\$14725 (\$14566.40), PC:\$3374 (\$3337.66), MC:\$2475 (\$2448.34), HC:\$8876 (\$8780.40)  
Predicted disease state specific:

|    |                          |                       |                              |                        |                                          |                                               |                             |
|----|--------------------------|-----------------------|------------------------------|------------------------|------------------------------------------|-----------------------------------------------|-----------------------------|
| 1  |                          |                       |                              |                        |                                          |                                               |                             |
| 2  |                          |                       |                              |                        |                                          |                                               |                             |
| 3  |                          |                       |                              |                        |                                          |                                               |                             |
| 4  |                          |                       |                              |                        |                                          |                                               |                             |
| 5  |                          |                       |                              |                        |                                          |                                               |                             |
| 6  |                          |                       |                              |                        | HC:\$2669 (\$2640.25)                    |                                               |                             |
| 7  |                          |                       |                              |                        | Predicted hospitalised patient: HC\$9214 |                                               |                             |
| 8  |                          |                       |                              |                        | (\$9114.76)                              |                                               |                             |
| 9  | <i>Pittman et al</i> [6] | To examine the        | <u>Design:</u> Retrospective | <u>Measure:</u> MPR    | Total                                    | <u>Type of Costs:</u> adjusted                | <u>Quality:</u> medium      |
| 10 | 2011                     | relation among statin | cohort study                 | <u>Classification:</u> | Healthcare                               | <u>Classification:</u> all cause and disease  | <u>Classification:</u> cost |
| 11 | US                       | adherence, subsequent | <u>Follow Up:</u> 18 months  | MPR ≥ 80 =             | Costs                                    | state specific                                | description                 |
| 12 |                          | hospitalizations and  | <u>Sample Size:</u> 381422   | >60<79% =              | Pharmacy                                 | <u>Currency Year:</u> USD, 2009               |                             |
| 13 |                          | healthcare costs.     | (A:258013, MA:65795,         | moderate               | Costs                                    | <u>Cost of Nonadherence</u> *: all cause:     |                             |
| 14 |                          |                       | LA:57614)                    | adherence, MPR         | Medical Costs                            | THC(>80):\$6798.67 (\$7505.66),               |                             |
| 15 |                          |                       |                              | <59 =low               |                                          | THC(60-79):\$7072.67 (\$7808.16),             |                             |
| 16 |                          |                       |                              | adherence              |                                          | THC(<59):\$7401.33 (\$8170.99),               |                             |
| 17 |                          |                       |                              | <u>Method of</u>       |                                          | PC(>80):\$1767.33 (\$1951.11),                |                             |
| 18 |                          |                       |                              | <u>Assessment:</u>     |                                          | PC(60-79):\$1789.33 (\$1975.40),              |                             |
| 19 |                          |                       |                              | pharmacy claims        |                                          | PC(<59):\$1937.33 (\$2138.79),                |                             |
| 20 |                          |                       |                              | data                   |                                          | MC(>80):\$4472.67 (\$4937.78),                |                             |
| 21 |                          |                       |                              |                        |                                          | MC(60-79):\$4840.67 (\$5344.05),              |                             |
| 22 |                          |                       |                              |                        |                                          | MC(<59):\$5138.67 (\$5673.04)                 |                             |
| 23 |                          |                       |                              |                        |                                          | Disease state specific:                       |                             |
| 24 |                          |                       |                              |                        |                                          | PC(>80):\$558.67 (\$616.77),                  |                             |
| 25 |                          |                       |                              |                        |                                          | PC(60-79):\$442.67 (\$488.70),                |                             |
| 26 |                          |                       |                              |                        |                                          | PC(<59):\$325.33 (\$359.16),                  |                             |
| 27 |                          |                       |                              |                        |                                          | MC(>80):\$1596.67 (\$1762.71),                |                             |
| 28 |                          |                       |                              |                        |                                          | MC(60-79):\$1722 (\$1901.07),                 |                             |
| 29 |                          |                       |                              |                        |                                          | MC(<59):\$1792.67 (\$1979.09)                 |                             |
| 30 |                          |                       |                              |                        |                                          |                                               |                             |
| 31 | <i>Pittman et al</i> [7] | To evaluate the       | <u>Design:</u> Retrospective | <u>Measure:</u> MPR    | Total                                    | <u>Type of Costs:</u> adjusted and unadjusted | <u>Quality:</u> medium      |
| 32 | 2010                     | relationship between  | cohort study                 | <u>Classification:</u> | Healthcare                               | <u>Classification:</u> disease state specific | <u>Classification:</u> cost |
| 33 | US                       | adherence to          | <u>Follow Up:</u> 2 years    | MPR ≥ 80 =             | Costs                                    | <u>Currency Year:</u> USD, 2008               | description                 |
| 34 |                          | antihypertensive      | <u>Sample Size:</u>          | >60<79% =              | Outpatient                               | <u>Cost of Nonadherence:</u> Adjusted:        |                             |
| 35 |                          | medications and       | 625620(A:467006,             | moderate               | Costs                                    | THC(>80):\$7261 (\$8077.79),                  |                             |
| 36 |                          | subsequent            | MA:96226, LA:62388)          | adherence, MPR         | ED Costs                                 | THC(60-79):\$7530 (\$8377.05),                |                             |
| 37 |                          | hospitalizations,     |                              | <59 =low               | Pharmacy                                 | THC(<59):\$7370 (\$8199.05),                  |                             |
| 38 |                          | emergency             |                              | adherence              | Costs                                    | OC(>80):\$3390 (\$3771.34),                   |                             |
| 39 |                          | department visits and |                              |                        | Hospitalization                          | OC(60-79):\$3705 (\$4121.77),                 |                             |
| 40 |                          |                       |                              |                        |                                          |                                               |                             |
| 41 |                          |                       |                              |                        |                                          |                                               |                             |
| 42 |                          |                       |                              |                        |                                          |                                               |                             |
| 43 |                          |                       |                              |                        |                                          |                                               |                             |
| 44 |                          |                       |                              |                        |                                          |                                               |                             |
| 45 |                          |                       |                              |                        |                                          |                                               |                             |
| 46 |                          |                       |                              |                        |                                          |                                               |                             |
| 47 |                          |                       |                              |                        |                                          |                                               |                             |
| 48 |                          |                       |                              |                        |                                          |                                               |                             |
| 49 |                          |                       |                              |                        |                                          |                                               |                             |

costs of care.

Method of Assessment:  
pharmacy claims data

Costs

OC(<59):\$3776 (\$4200.76),  
EDC(>80):\$101 (\$112.36),  
EDC(60-79):\$134 (\$149.07),  
EDC(<59):\$172 (\$191.35),  
PC(>80):\$2383 (\$2651.06),  
PC(60-79):\$1932 (\$2149.33),  
PC(<59):\$1509 (\$1678.75),  
HC(>80):\$1386 (\$1541.91),  
HC(60-79):\$1759 (\$1956.87),  
HC(<59):\$1913 (\$2128.19)  
Unadjusted:  
THC(>80):\$7182 (\$7989.90),  
THC(60-79):\$7560 (\$8410.42),  
THC(<59):\$7995 (\$8894.35),  
OC(>80):\$3396 (\$3778.01),  
OC(60-79):\$3635 (\$4043.90),  
OC(<59):\$3887 (\$4324.25),  
EDC(>80):\$102 (\$113.47),  
EDC(60-79):\$131 (\$145.74),  
EDC(<59):\$172 (\$191.35),  
PC(>80):\$2317 (\$2577.64),  
PC(60-79):\$2034 (\$2262.80),  
PC(<59):\$1880 (\$2091.48),  
HC(>80):\$1366 (\$1519.66),  
HC(60-79):\$1759 (\$1956.87),  
HC(<59):\$2057 (\$2288.39)

For peer review

Rizzo et al[8]  
1997  
US

To investigate variations in compliance with four classes of antihypertensive agents- diuretics, ACEIs, CCBs and  $\beta$ -

Design: Retrospective cohort study  
Follow Up: 12 months  
Sample Size: 7211(P:2668, NC:3101, NP:649, T:793)

Measure: ordinary least square regression analysis  
Classification: >80% = persistent,  $\geq$ 30<80% = non-compliance, <30%

Total Healthcare Costs

Type of Costs: unadjusted  
Classification: all cause and disease state specific  
Currency Year: USD, 1994  
Cost of Nonadherence: All cause:  
THC(>80):\$341 (\$509.66),  
THC(30-80):\$694 (\$1037.26),

Quality: low  
Classification: cost description

1  
2  
3  
4  
5  
6  
7  
8  
9  
10  
11  
12  
13  
14  
15  
16  
17  
18  
19  
20  
21  
22  
23  
24  
25  
26  
27  
28  
29  
30  
31  
32  
33  
34  
35  
36  
37  
38  
39  
40  
41  
42  
43  
44  
45  
46  
47  
48  
49

blockers and the health care costs associated with various degrees of compliance.

= non-persistence  
Method of Assessment:  
pharmacy claims data

THC(<30):\$735 (\$1098.53)  
Disease state specific:  
Renal:  
THC(>80):\$2135 (\$3190.98),  
THC(30-80):\$2488 (\$3718.58),  
THC(<30):\$2529 (\$3779.86),  
Acute MI:  
THC(>80):\$1358 (\$2029.67),  
THC(30-80):\$1711 (\$2557.27),  
THC(<30):\$1752 (\$2618.55), Diabetes:  
THC(>80):\$770 (\$1150.85),  
THC(30-80):\$1123 (\$1678.44),  
THC(<30):\$1164 (\$1739.72),  
CHF:  
THC(>80):\$698 (\$1043.23),  
THC(30-80):\$1051 (\$1570.83),  
THC(<30):\$1092 (\$1632.11),  
Angina:  
THC(>80):\$702 (\$1049.21),  
THC(30-80):\$1055 (\$1576.81),  
THC(<30):\$1096 (\$1638.09)

For peer review

Sokol et al[9]  
2005  
US

To evaluate the impact of medication adherence on healthcare utilisation and cost for 4 chronic conditions that are major drivers of drug spending: diabetes, hypertension, hypercholesterolemia, and congestive heart failure.

Design: Retrospective cohort observational study  
Follow Up: 12 months  
Sample Size: 137277  
Diabetes:(≥80: 1801, 60-79: 599, 40-59: 419, 20-39: 259, <19: 182)  
Hypertension:(≥80: 5804, 60-79: 921, 40-59: 562, 20-39: 344, <19: 350)

Measure:  
medication supply  
Classification: 1-19%, 20-39%, 40-59%, 60-79%, 80-100%  
Method of Assessment:  
pharmacy claims data

Total Costs  
Pharmacy Costs  
Medical Costs

Type of Costs: adjusted  
Classification: all cause and disease state specific  
Currency Year: USD, 1998  
Cost of Nonadherence: All cause:  
Diabetes:  
TC(1-19):\$16498 (\$23071.58),  
TC(20-39):\$13077 (\$18287.49),  
TC(40-59):\$12978 (\$18149.05),  
TC(60-79):\$11484 (\$16059.77),  
TC(80-100):\$8886 (\$12426.60),  
PC(1-19):\$1312 (\$1834.76),

Quality: medium  
Classification: cost description

Hypercholesterolemia:  
(≥80: 1754, 60-79: 520,  
40-59: 324, 20-39: 216,  
<19: 167)

CHF: (≥80: 518, 60-79:  
107, 40-59: 82, 20-39:  
70, <19: 86)

PC(20-39):\$1877 (\$2624.89),  
PC(40-59):\$1970 (\$2754.94),  
PC(60-79):\$2121 (\$2966.11),  
PC(80-100):\$2510 (\$3510.10),  
MC(1-19):\$15186 (\$21236.82),  
MC(20-39):\$11200 (\$15662.61),  
MC(40-59):\$11008 (\$15394.10),  
MC(60-79):\$9363 (\$13093.66),  
MC(80-100):\$6377 (\$8917.90),

Hypertension:

TC(1-19):\$9747 (\$13630.66),  
TC(20-39):\$11238 (\$15715.75),  
TC(40-59):\$9491 (\$13272.66),  
TC(60-79):\$8929 (\$12486.73),  
TC(80-100):\$8386 (\$11272.38),  
PC(1-19):\$916 (\$1280.98),  
PC(20-39):\$952 (\$1331.32),  
PC(40-59):\$1123 (\$1570.46),  
PC(60-79):\$1271 (\$1777.43),  
PC(80-100):\$1817 (\$2540.98),  
MC(1-19):\$8831 (\$12349.69),  
MC(20-39):\$10286 (\$14384.43),  
MC(40-59):\$8368 (\$11702.20),  
MC(60-79):\$7658 (\$10709.31),  
MC(80-100):\$6570 (\$9187.80),

Hypercholesterolemia:

TC(1-19):\$10916 (\$15265.45),  
TC(20-39):\$7982 (\$11162.40),  
TC(40-59):\$6756 (\$9447.91),  
TC(60-79):\$8412 (\$11763.74),  
TC(80-100):\$6752 (\$9442.31),  
PC(1-19):\$1067 (\$1492.14),  
PC(20-39):\$1152 (\$1611.01),

1  
2  
3  
4  
5  
6  
7  
8  
9  
10  
11  
12  
13  
14  
15  
16  
17  
18  
19  
20  
21  
22  
23  
24  
25  
26  
27  
28  
29  
30  
31  
32  
33  
34  
35  
36  
37  
38  
39  
40  
41  
42  
43  
44  
45  
46  
47  
48  
49

PC(40-59):\$1247 (\$1743.86),  
PC(60-79):\$1736 (\$2427.70),  
PC(80-100):\$1972 (\$2757.74),  
MC(1-19):\$9849(\$13773.30),  
MC(20-39):\$6830 (\$9551.39),  
MC(40-59):\$5509 (\$7704.04),  
MC(60-79):\$6676 (\$9336.03),  
MC(80-100):\$4780 (\$6684.58),  
CHF:  
TC(1-19):\$23964 (\$33512.38),  
TC(20-39):\$19188 (\$26833.40),  
TC(40-59):\$26311 (\$36794.54),  
TC(60-79):\$29785 (\$41652.74),  
TC(80-100):\$22164 (\$30995.18),  
PC(1-19):\$1961 (\$2742.35),  
PC(20-39):\$2055 (\$2873.81),  
PC(40-59):\$2208 (\$3087.77),  
PC(60-79):\$3412 (\$4771.50),  
PC(80-100):\$3107 (\$4344.97),  
MC(1-19):\$22003 (\$30770.03),  
MC(20-39):\$17133 (\$23959.59),  
MC(40-59):\$24103 (\$33706.77),  
MC(60-79):\$26373 (\$36881.24),  
MC(80-100):\$19056 (\$26648.81)  
Disease state specific: Diabetes:  
TC(1-19):\$8867 (\$12400.03),  
TC(20-39):\$4124 (\$5767.20),  
TC(40-59):\$6522 (\$9120.67),  
TC(60-79):\$6291 (\$8797.63),  
TC(80-100):\$4570 (\$6390.90),  
PC(1-19):\$55 (\$76.91),  
PC(20-39):\$165 (\$230.74),  
PC(40-59):\$285 (\$398.56),

1  
2  
3  
4  
5  
6  
7  
8  
9  
10  
11  
12  
13  
14  
15  
16  
17  
18  
19  
20  
21  
22  
23  
24  
25  
26  
27  
28  
29  
30  
31  
32  
33  
34  
35  
36  
37  
38  
39  
40  
41  
42  
43  
44  
45  
46  
47  
48  
49

PC(60-79):\$404 (\$564.97),  
PC(80-100):\$763 (\$1067.02),  
MC(1-19):\$8812 (\$12323.11),  
MC(20-39):\$6959 (\$9731.79),  
MC(40-59):\$6237 (\$8722.11),  
MC(60-79):\$5887 (\$8232.66),  
MC(80-100):\$3808 (\$5325.29),  
Hypertension:  
TC(1-19):\$4878 (\$6821.62),  
TC(20-39):\$6062 (\$8477.39),  
TC(40-59):\$5297 (\$7407.57),  
TC(60-79):\$5262 (\$7358.63),  
TC(80-100):\$4871 (\$6811.84),  
PC(1-19):\$31 (\$43.35),  
PC(20-39):\$89(\$124.46),  
PC(40-59):\$184 (\$257.31),  
PC(60-79):\$285 (\$398.56),  
PC(80-100):\$489 (\$683.84),  
MC(1-19):\$4847 (\$6778.27),  
MC(20-39):\$5973 (\$8352.92),  
MC(40-59):\$5113 (\$7150.26),  
MC(60-79):\$4977 (\$6960.07),  
MC(80-100):\$4383 (\$6129.39),  
Hypercholesterolemia:  
TC(1-19):\$6888 (\$9632.50),  
TC(20-39):\$4999 (\$6990.84),  
TC(40-59):\$3825 (\$5349.06),  
TC(60-79):\$5541 (\$7748.79),  
TC(80-100):\$3924(\$5487.51),  
PC(1-19):\$78 (\$109.08),  
PC(20-39):\$213 (\$297.87),  
PC(40-59):\$373 (\$521.62),  
PC(60-79):\$603 (\$843.26),



1  
2  
3  
4  
5  
6  
7  
8  
9  
10  
11  
12  
13  
14  
15  
16  
17  
18  
19  
20  
21  
22  
23  
24  
25  
26  
27  
28  
29  
30  
31  
32  
33  
34  
35  
36  
37  
38  
39  
40  
41  
42  
43  
44  
45  
46  
47  
48  
49

For peer review

PC(80-100):\$801 (\$1120.16),  
MC(1-19):\$6810 (\$9523.42),  
MC(20-39):\$4786 (\$6692.97),  
MC(40-59):\$3452 (\$4827.44),  
MC(60-79):\$4938 (\$6905.53),  
MC(80-100):\$3124 (\$4368.75),  
CHF:  
TC(1-19):\$9841 (\$13762.12),  
TC(20-39):\$7733 (\$10814.19),  
TC(40-59):\$11378 (\$15911.53),  
TC(60-79):\$13924 (\$19471.98),  
TC(80-100):\$12698 (\$17787.48),  
PC(1-19):\$15 (\$20.98),  
PC(20-39):\$90 (\$125.86),  
PC(40-59):\$134 (\$187.39),  
PC(60-79):\$158 (\$220.95),  
PC(80-100):\$437 (\$611.12),  
MC(1-19):\$9826 (\$13741.14),  
MC(20-39):\$7643 (\$10688.33),  
MC(40-59):\$11244 (\$15724.14),  
MC(60-79):\$13766 (\$19251.02),  
MC(80-100):\$12261 (\$17146.36)

*Stroupe et al[10]*  
2006  
US

To determine the rates of undersupply, appropriate supply, and oversupply of antihypertensive drugs as measured by refill adherence, among patient with complicated and uncomplicated hypertension and to

Design: Retrospective cohort study  
Follow Up: 3.3 years  
Sample Size: 15206 (not specified)

Measure: MPR  
Classification:  
MPR<80 = undersupply, MPR >120 = oversupply  
Method of Assessment:  
pharmacy claims data

Total Healthcare Costs  
Inpatient Costs  
Outpatient Costs  
Pharmacy Costs

Type of Costs: unadjusted  
Classification: disease state specific  
Currency Year: USD, 2002  
Cost of Nonadherence\*\*: THC:\$6032.5 (\$7830.11), IC:\$2067 (\$2682.94), OC:\$3965 (\$5146.52), PC:\$130 (\$1683.74)

Quality: medium  
Classification: cost description

1  
2  
3  
4  
5  
6  
7  
8  
9  
10  
11  
12  
13  
14  
15  
16  
17  
18  
19  
20  
21  
22  
23  
24  
25  
26  
27  
28  
29  
30  
31  
32  
33  
34  
35  
36  
37  
38  
39  
40  
41  
42  
43  
44  
45  
46  
47  
48  
49

examine the association of refill adherence with hospitalization and healthcare costs among these patients.

Wu et al[11]  
2011  
US

To study statin adherence and assess associated medical utilisation and healthcare costs in patients with type 2 diabetes, based on national Medicaid database.

Design: Retrospective cohort study  
Follow Up: 1 year  
Sample Size: 1705 (A:624, NA:1081)

Measure: MPR  
Classification: MPR≥80 = adherent, MPR <80 = nonadherent  
Method of Assessment: pharmacy claims data

Total Healthcare Costs  
Pharmacy Costs  
Medical Costs

Type of Costs: adjusted  
Classification: all cause and disease state specific  
Currency Year: USD, 2005  
Cost of Nonadherence: all cause: THC:\$17807 (\$21370.30), PC:\$4915 (\$5898.52) MC:\$12892 (\$15471.77)  
Disease state specific: THC:\$2789 (\$3347.10), PC:\$489(\$586.85) MC:\$2300 (\$2760.25)

Quality: medium  
Classification: cost description

Zhao et al[12]  
2014  
US

To evaluate the associations between statin adherence level, healthcare costs, hospital admissions and emergency room visits after statin therapy is taken for 1 year.

Design: Retrospective cohort study  
Follow Up: 1 year  
Sample Size: 10312 (96-100: 2453, 90-95: 1496, 85-89: 584, 80-84: 768, 70-79: 960, 60-69: 777, 40-59: 1687, <40:1587)

Measure: MPR  
Classification: <40%, 40-59%, 60-69%, 70-79%, 80-84%, 85-89%, 90-95%, 96-100%  
Method of Assessment: pharmacy claims data, census data

Total Healthcare Costs  
Pharmacy Costs  
Medical Costs

Type of Costs: unadjusted  
Classification: all cause and disease state specific  
Currency Year: USD, 2010  
Cost of Nonadherence: all cause: PC(96-100):\$2976.80 (\$3247.04), PC(90-95):\$2826.99 (\$3083.63), PC(85-89):\$2795.39 (\$3049.16), PC(80-84):\$2690.89 (\$2935.17), PC(70-79):\$2192.83 (\$2391.90), PC(60-69):\$2323.27 (\$2534.18), PC(40-59):\$2153.93 (\$2349.47), PC(<40):\$1749.18 (\$1907.97)  
Disease state specific: THC(96-100):\$6536.05 (\$7129.40), THC(90-95):\$6493.80 (\$7083.31),

Quality: medium  
Classification: cost description

1  
2  
3  
4  
5  
6  
7  
8  
9  
10  
11  
12  
13  
14  
15  
16  
17  
18  
19  
20  
21  
22  
23  
24  
25  
26  
27  
28  
29  
30  
31  
32  
33  
34  
35  
36  
37  
38  
39  
40  
41  
42  
43  
44  
45  
46  
47  
48  
49

For peer review only

THC(85-89):\$6459.40 (\$7045.79),  
THC(80-84):\$6227.47 (\$6792.80),  
THC(70-79):\$5713.47 (\$6232.14),  
THC(60-69):\$5875.26 (\$6408.62),  
THC(40-59):\$5817.58 (\$6345.70),  
THC(<40):\$5249.12 (\$5725.64),  
PC(96-100):\$449.86 (\$490.70), PC(90-95):\$439.74 (\$479.66),  
PC(85-89):\$458.83 (\$500.48),  
PC(80-84):\$423.15 (\$461.56),  
PC(70-79):\$356.74 (\$389.13),  
PC(60-69):\$371.30 (\$405.01),  
PC(40-59):\$279.21 (\$304.56),  
PC(<40):\$133.92 (\$146.08),  
MC(96-100):\$3559.25 (\$3882.36),  
MC(90-95):\$3666.81 (\$3999.69),  
MC(85-89):\$3664 (\$3996.62), MC(80-84):\$3586.58 (\$3912.17), MC(70-79):\$3520.64 (\$3840.25), MC(60-69):\$3551.99 (\$3874.44), MC(40-59):\$3663.65 (\$3996.24),  
MC(<40):\$3499.95 (\$3817.68)

**Mental Health**

*Bagalman et al*[13]  
2010  
US

To examine the association between treatment adherence and indirect productivity costs within a cohort of commercially insured employees with bipolar disorder.

Design: Retrospective cohort study  
Follow Up: 1 year  
Sample Size: 1258 (A:444, NA:814)

Measure: MPR  
Classification: MPR≥80 = adherent, MPR <80 = nonadherent  
Method of Assessment: pharmacy claims data

Total Costs  
Short term disability cost  
Workers compensation cost  
Paid time off cost

Type of Costs: adjusted  
Classification: disease state specific  
Currency Year: USD, 2005  
Cost of Nonadherence: TC:\$6894 (\$8273.53), STDC:\$2134 (\$2561.03), WCC:\$762 (\$914.48), PTOC:\$3998 (\$4798.03)

Quality: medium  
Classification: cost description

|                                                                                                                                                                                                                                                                                           |                                                |                                                                                                                                                                                           |                                                                                                                                                                    |                                                                                                                                                                                                                                                           |                                                                                                                                   |                                                                                                                                                                                                                                                                                                                              |                                                                           |
|-------------------------------------------------------------------------------------------------------------------------------------------------------------------------------------------------------------------------------------------------------------------------------------------|------------------------------------------------|-------------------------------------------------------------------------------------------------------------------------------------------------------------------------------------------|--------------------------------------------------------------------------------------------------------------------------------------------------------------------|-----------------------------------------------------------------------------------------------------------------------------------------------------------------------------------------------------------------------------------------------------------|-----------------------------------------------------------------------------------------------------------------------------------|------------------------------------------------------------------------------------------------------------------------------------------------------------------------------------------------------------------------------------------------------------------------------------------------------------------------------|---------------------------------------------------------------------------|
| 1<br>2<br>3<br>4<br>5<br>6<br>7<br>8<br>9<br>10<br>11<br>12<br>13<br>14<br>15<br>16<br>17<br>18<br>19<br>20<br>21<br>22<br>23<br>24<br>25<br>26<br>27<br>28<br>29<br>30<br>31<br>32<br>33<br>34<br>35<br>36<br>37<br>38<br>39<br>40<br>41<br>42<br>43<br>44<br>45<br>46<br>47<br>48<br>49 | <p><i>Becker et al</i>[14]<br/>2007<br/>US</p> | <p>Examine treatment outcomes and costs associated with adherence rates by antipsychotic medication class for Medicaid beneficiaries.</p>                                                 | <p><u>Design:</u> Retrospective cohort study<br/><u>Follow Up:</u> 2 years<br/><u>Sample Size:</u> 10330 (&gt;75%:6609, 50-74%:1276, 25-49%:1940, &lt;25%:505)</p> | <p><u>Measure:</u> prescription refill rate<br/><u>Classification:</u> 75-100% = maximal adherence, 50-74.9% = moderate adherence, 25-49.9% = minimal adherence, &lt;25% = negligible adherence<br/><u>Method of Assessment:</u> pharmacy claims data</p> | <p>Total Costs</p>                                                                                                                | <p><u>Type of Costs:</u> unadjusted<br/><u>Classification:</u> disease state specific<br/><u>Currency Year:</u> USD, 2006<br/><u>Cost of Nonadherence*:</u><br/>TC(75-100):\$13564 (\$15792.91),<br/>TC(50-74):\$13772 (\$16035.09),<br/>TC(25-49):\$15792 (\$18387.03),<br/>TC(&lt;25):\$16156 (\$18810.84)</p>             | <p><u>Quality:</u> low<br/><u>Classification:</u> cost description</p>    |
|                                                                                                                                                                                                                                                                                           | <p><i>Eaddy et al</i>[15]<br/>2005<br/>US</p>  | <p>To evaluate the effect of partial compliance of patients with prescribed oral atypical and conventional antipsychotic agents and the corresponding impact on resource utilisation.</p> | <p><u>Design:</u> Retrospective database analysis<br/><u>Follow Up:</u> 1 year<br/><u>Sample Size:</u> 7864 (&lt;80%:2655, 80-125%:5065, &gt;125%:144)</p>         | <p><u>Measure:</u> continuous multiple interval medications available<br/><u>Classification:</u> &lt;80% = partially compliant, 80-125% = compliant, &gt;125% = overly compliant<br/><u>Method of Assessment:</u> pharmacy claims data</p>                | <p>Inpatient costs<br/>Outpatient costs<br/>Pharmacy costs<br/>Medical costs<br/>Physician office visit costs<br/>Other costs</p> | <p><u>Type of Costs:</u> unadjusted<br/><u>Classification:</u> disease state specific<br/><u>Currency Year:</u> USD, 2002<br/><u>Cost of Nonadherence*:</u><br/>IC:\$37380 (\$4906.39),<br/>OC:\$504 (\$654.19),<br/>PC:\$1872 (\$2429.83),<br/>MC:\$6228 (\$8083.86),<br/>POC:\$1944 (\$2523.29)<br/>OtC:\$12 (\$15.58)</p> | <p><u>Quality:</u> medium<br/><u>Classification:</u> cost description</p> |
|                                                                                                                                                                                                                                                                                           | <p><i>Gilmer et al</i>[16]<br/>2004</p>        | <p>To evaluate the relationship between</p>                                                                                                                                               | <p><u>Design:</u> Retrospective database analysis</p>                                                                                                              | <p><u>Measure:</u> cumulative</p>                                                                                                                                                                                                                         | <p>Total costs<br/>Outpatient</p>                                                                                                 | <p><u>Type of Costs:</u> adjusted<br/><u>Classification:</u> disease state specific</p>                                                                                                                                                                                                                                      | <p><u>Quality:</u> medium<br/><u>Classification:</u> cost</p>             |

1  
2  
3  
4  
5  
6  
7  
8  
9  
10  
11  
12  
13  
14  
15  
16  
17  
18  
19  
20  
21  
22  
23  
24  
25  
26  
27  
28  
29  
30  
31  
32  
33  
34  
35  
36  
37  
38  
39  
40  
41  
42  
43  
44  
45  
46  
47  
48  
49

|                         |                                                                                                                                                              |                                                                                                                           |                                                                                                                                                                                                     |                                                                                               |                                                                                                                                                                                                                                                                                                                                                        |                                                                   |
|-------------------------|--------------------------------------------------------------------------------------------------------------------------------------------------------------|---------------------------------------------------------------------------------------------------------------------------|-----------------------------------------------------------------------------------------------------------------------------------------------------------------------------------------------------|-----------------------------------------------------------------------------------------------|--------------------------------------------------------------------------------------------------------------------------------------------------------------------------------------------------------------------------------------------------------------------------------------------------------------------------------------------------------|-------------------------------------------------------------------|
| US                      | adherence to treatment with antipsychotic medication and health expenditures. Secondary objective was to identify risk factors predictive of non-adherence.  | <u>Follow Up:</u> 1 year<br><u>Sample Size:</u> 1619 (<49%:388, 50-79%:259, 80-100%:664, >110%:308)                       | <u>possession ratio Classification:</u> <49% = nonadherent, 50-79% = partially adherent, 80-100% = adherent, >110% = excess medication fillers<br><u>Method of Assessment:</u> pharmacy claims data | costs<br>Pharmacy costs<br>Hospitalization costs                                              | <u>Currency Year:</u> USD, 1999<br><u>Cost of Nonadherence:</u> TC:\$8168 (\$11261.74), OC:\$3464 (\$4776.04), PC:\$1542 (\$2126.05), HC:\$3413 (\$4705.72)                                                                                                                                                                                            | description                                                       |
| Hong et al[17] 2011 UK  | To investigate clinical and economic consequences of medication non-adherence in the treatment of bipolar disorder following a manic or mixed episode.       | <u>Design:</u> Prospective observational study<br><u>Follow Up:</u> 21 months<br><u>Sample Size:</u> 1341(A:1024, NA:317) | <u>Measure:</u> assessed by treating psychiatrist<br><u>Classification:</u> adherent vs. nonadherent<br><u>Method of Assessment:</u> observational assessment                                       | Total costs<br>Inpatient costs<br>Outpatient costs<br>Pharmacy costs<br>Hospitalization costs | <u>Type of Costs:</u> unadjusted<br><u>Classification:</u> all cause and disease state specific<br><u>Currency Year:</u> GBP, 2008<br><u>Cost of Nonadherence*:</u> all cause: PC:£55.43 (\$94.47)<br>Disease state specific: TC:£5846.29 (\$9964.10) IC:£2740.57 (\$4670.88), OC:£1082.86 (\$1845.57), PC:£1630.29 (\$2778.58), HC:£337.14 (\$574.60) | <u>Quality:</u> medium<br><u>Classification:</u> cost description |
| Jiang et al[18] 2015 US | To estimate the impact of adherence to and persistence with atypical antipsychotics on healthcare costs and risk of hospitalization by controlling potential | <u>Design:</u> Retrospective cohort study<br><u>Follow Up:</u> 2 years<br><u>Sample Size:</u> 32374 (A:11642, NA:20732)   | <u>Measure:</u> PDC<br><u>Classification:</u> (PDC>80% = adherent, PDC<80% = nonadherent)<br><u>Method of Assessment:</u>                                                                           | Total costs<br>Pharmacy costs<br>Medical services costs                                       | <u>Type of Costs:</u> unadjusted<br><u>Classification:</u> disease state specific<br><u>Currency Year:</u> USD, 2011<br><u>Cost of Nonadherence:</u> Disease state specific: TC:\$14141 (\$14517.37) PC:\$3971 (\$4076.69), MSC:\$10170 (\$10440.68)                                                                                                   | <u>Quality:</u> low<br><u>Classification:</u> cost description    |

|    |                         |                         |                              |                        |                 |                                               |
|----|-------------------------|-------------------------|------------------------------|------------------------|-----------------|-----------------------------------------------|
| 1  |                         |                         |                              |                        |                 |                                               |
| 2  |                         |                         |                              |                        |                 |                                               |
| 3  |                         |                         |                              |                        |                 |                                               |
| 4  |                         |                         |                              |                        |                 |                                               |
| 5  |                         | sources of endogeneity  |                              | medical and            |                 |                                               |
| 6  |                         |                         |                              | pharmacy claims        |                 |                                               |
| 7  |                         |                         |                              | data                   |                 |                                               |
| 8  | <i>Joe et al</i> [19]   | To investigate the      | <u>Design:</u> Retrospective | <u>Measure:</u>        | Total costs     | <u>Type of Costs:</u> adjusted                |
| 9  | 2016                    | association between     | cohort study                 | percentage of          |                 | <u>Classification:</u> all cause and disease  |
| 10 | South Korea             | psychiatric medication  | <u>Follow Up:</u> 1 year     | days of psychiatric    |                 | state specific                                |
| 11 |                         | non-compliance and      | <u>Sample Size:</u> 7848     | prescription (PDP)     |                 | <u>Currency Year:</u> USD, 2011               |
| 12 |                         | psychiatric and non-    | (A:2774, NA:2774,            | <u>Classification:</u> |                 | <u>Cost of Nonadherence:</u> all cause:       |
| 13 |                         | psychiatric service     | P:1956, NP:1956)             | PDP≥80% =              |                 | TC:\$4961 (\$5271.40)                         |
| 14 |                         | utilisation and costs.  |                              | adherent,              |                 | Disease state specific:                       |
| 15 |                         |                         |                              | PDP<80% =              |                 | TC:\$3061 (\$3252.50)                         |
| 16 |                         |                         |                              | nonadherent;           |                 |                                               |
| 17 |                         |                         |                              | persistent =           |                 |                                               |
| 18 |                         |                         |                              | continued              |                 |                                               |
| 19 |                         |                         |                              | medication             |                 |                                               |
| 20 |                         |                         |                              | without                |                 |                                               |
| 21 |                         |                         |                              | interruption ≥ 56      |                 |                                               |
| 22 |                         |                         |                              | day, non-              |                 |                                               |
| 23 |                         |                         |                              | persistent = at        |                 |                                               |
| 24 |                         |                         |                              | least one              |                 |                                               |
| 25 |                         |                         |                              | medication             |                 |                                               |
| 26 |                         |                         |                              | interruption > 56      |                 |                                               |
| 27 |                         |                         |                              | days                   |                 |                                               |
| 28 |                         |                         |                              | <u>Method of</u>       |                 |                                               |
| 29 |                         |                         |                              | <u>Assessment:</u>     |                 |                                               |
| 30 |                         |                         |                              | health insurance       |                 |                                               |
| 31 |                         |                         |                              | data                   |                 |                                               |
| 32 |                         |                         |                              |                        |                 |                                               |
| 33 |                         |                         |                              |                        |                 |                                               |
| 34 | <i>Knapp et al</i> [20] | To assess the relative  | <u>Design:</u> Retrospective | <u>Measure:</u> self-  | Total costs     | <u>Type of Costs:</u> predicted               |
| 35 | 2004                    | impact of non-          | cohort study                 | report                 | Inpatient costs | <u>Classification:</u> disease state specific |
| 36 | UK                      | adherence and other     | <u>Follow Up:</u> 1 year     | <u>Classification:</u> | External        | <u>Currency Year:</u> GBP, 2001               |
| 37 |                         | factors associated with | <u>Sample Size:</u> 658      | adherent vs.           | services costs  | <u>Cost of Nonadherence:</u>                  |
| 38 |                         | resource use and costs  | (A:549, NA:109)              | nonadherent            |                 | TC:£57580 (\$116434.12)                       |
| 39 |                         | incurred by people      |                              | <u>Method of</u>       |                 | IC:£6714 (\$13576.57),                        |
| 40 |                         |                         |                              |                        |                 |                                               |
| 41 |                         |                         |                              |                        |                 |                                               |
| 42 |                         |                         |                              |                        |                 |                                               |
| 43 |                         |                         |                              |                        |                 |                                               |
| 44 |                         |                         |                              |                        |                 |                                               |
| 45 |                         |                         |                              |                        |                 |                                               |
| 46 |                         |                         |                              |                        |                 |                                               |
| 47 |                         |                         |                              |                        |                 |                                               |
| 48 |                         |                         |                              |                        |                 |                                               |
| 49 |                         |                         |                              |                        |                 |                                               |

|    |                            |                         |                              |                         |                       |                                              |
|----|----------------------------|-------------------------|------------------------------|-------------------------|-----------------------|----------------------------------------------|
| 1  |                            |                         |                              |                         |                       |                                              |
| 2  |                            |                         |                              |                         |                       |                                              |
| 3  |                            |                         |                              |                         |                       |                                              |
| 4  |                            |                         |                              |                         |                       |                                              |
| 5  |                            | with schizophrenia.     | <u>Assessment:</u>           |                         | ESC:£1603 (\$3241.47) |                                              |
| 6  |                            |                         | survey                       |                         |                       |                                              |
| 7  | <i>Offord et al</i> [21]   | To quantify early       | <u>Design:</u> Retrospective | <u>Measure:</u> time to | Total costs           | <u>Type of Costs:</u> adjusted               |
| 8  | 2013                       | nonadherence to         | cohort study                 | discontinuation         | Outpatient            | <u>Classification:</u> all cause and disease |
| 9  | US                         | antipsychotic           | <u>Follow Up:</u> 1 year     | <u>Classification:</u>  | costs                 | state specific                               |
| 10 |                            | medications in patients | <u>Sample Size:</u> 1462     | adherent vs.            | Pharmacy              | <u>Currency Year:</u> USD, 2008              |
| 11 |                            | with schizophrenia and  | (A:589, NA:873)              | nonadherent             | costs                 | <u>Cost of Nonadherence:</u> all cause:      |
| 12 |                            | its impact on short-    |                              | <u>Method of</u>        | Hospitalization       | TC:\$15400 (\$17132.34)                      |
| 13 |                            | term antipsychotic      |                              | <u>Assessment:</u>      | costs                 | OC:\$5773 (\$6422.40),                       |
| 14 |                            | adherence, healthcare   |                              | pharmacy claims         |                       | PC:\$3777 (\$4201.87),                       |
| 15 |                            | utilisation and costs.  |                              | data                    |                       | HC:\$5850 (\$6508.06)                        |
| 16 |                            |                         |                              |                         |                       | Disease state specific:                      |
| 17 |                            |                         |                              |                         |                       | TC:\$5358 (\$5960.72)                        |
| 18 |                            |                         |                              |                         |                       | OC:\$858 (\$954.52),                         |
| 19 |                            |                         |                              |                         |                       | PC:\$1549 (\$1723.25),                       |
| 20 |                            |                         |                              |                         |                       | HC:\$2952 (\$3284.07)                        |
| 21 |                            |                         |                              |                         |                       |                                              |
| 22 | <i>Offord et al</i> [22]   | To examine the impact   | <u>Design:</u> Retrospective | <u>Measure:</u> MPR     | Inpatient             | <u>Type of Costs:</u> adjusted               |
| 23 | 2013                       | of medication           | cohort study                 | <u>Classification:</u>  | costs                 | <u>Classification:</u> all cause and disease |
| 24 | US                         | adherence on            | <u>Follow Up:</u> 1 year     | MPR ≥ 70= high          | Pharmacy              | state specific                               |
| 25 |                            | healthcare utilisation  | <u>Sample Size:</u> 354      | adherence, MPR <        | costs                 | <u>Currency Year:</u> USD, 2008              |
| 26 |                            | among Medicare          | (A:126, NA:228)              | 70 = low                |                       | <u>Cost of Nonadherence:</u> all cause:      |
| 27 |                            | insured schizophrenia   |                              | adherence               |                       | IC:\$9053 (\$10071.37),                      |
| 28 |                            | patients.               |                              | <u>Method of</u>        |                       | PC:\$4267 (\$4746.99),                       |
| 29 |                            |                         |                              | <u>Assessment:</u>      |                       | Disease state specific:                      |
| 30 |                            |                         |                              | pharmacy claims         |                       | IC:\$2468 (\$2745.62),                       |
| 31 |                            |                         |                              | data                    |                       | PC:\$1085 (\$1207.05)                        |
| 32 |                            |                         |                              |                         |                       |                                              |
| 33 | <i>Robinson et al</i> [23] | To determine if the     | <u>Design:</u> Retrospective | <u>Measure:</u>         | Total costs           | <u>Type of Costs:</u> unadjusted             |
| 34 | 2006                       | type of antidepressant  | claims analysis              | Antidepressant          | Inpatient             | <u>Classification:</u> all cause and disease |
| 35 | US                         | drug is related to      | <u>Follow Up:</u> 6 months   | medication              | costs                 | state specific                               |
| 36 |                            | adherence and assess    | <u>Sample Size:</u> 60386    | management              | Outpatient            | <u>Currency Year:</u> USD, 2004              |
| 37 |                            | the 6 month health      | (A:11526, NA:8860)           | measures                | costs                 | <u>Cost of Nonadherence</u> †: all cause:    |
| 38 |                            | care costs among        |                              | <u>Classification:</u>  | ED visit costs        | TC:\$12658 (\$15678.21)                      |
| 39 |                            | newly diagnosed         |                              | meeting less than       | Pharmacy              | IC:\$3006 (\$3723.24),                       |
| 40 |                            |                         |                              |                         |                       |                                              |
| 41 |                            |                         |                              |                         |                       |                                              |
| 42 |                            |                         |                              |                         |                       |                                              |
| 43 |                            |                         |                              |                         |                       |                                              |
| 44 |                            |                         |                              |                         |                       |                                              |
| 45 |                            |                         |                              |                         |                       |                                              |
| 46 |                            |                         |                              |                         |                       |                                              |
| 47 |                            |                         |                              |                         |                       |                                              |
| 48 |                            |                         |                              |                         |                       |                                              |
| 49 |                            |                         |                              |                         |                       |                                              |

patients.

<3 medication management measures = nonadherent

costs Physician office visit costs

OC:\$6118 (\$7577.76),  
EDC:\$334 (\$413.69)  
PC:\$3200 (\$3963.52),  
POC:\$178 (\$220.47)  
Disease state specific:  
TC:\$2028 (\$2511.88)  
IC:\$102 (\$126.34),  
OC:\$734 (\$909.13),  
EDC:\$18 (\$22.29)  
PC:\$1174 (\$1454.12),  
POC:\$120 (\$148.63)

Svarstad et al[24]  
2001  
US

To examine the relationship of medication non-adherence to hospital use and costs among severely mentally ill clients.

Design: Retrospective database analysis  
Follow Up: 1 year  
Sample Size: 619 (A:413, NA:206)

Measure: quarter pharmacy claims  
Classification: one or more quarters without a claim = nonadherent  
Method of Assessment: pharmacy claims data, previous study data

Hospitalization costs

Type of Costs: unadjusted  
Classification: all cause and disease state specific  
Currency Year: USD, 1990  
Cost of Nonadherence: all cause:  
HC:\$3992 (\$6593.06)  
Disease state specific:  
Schizophrenia/schizo affective disorder:  
HC:\$3421 (\$5650.01)  
Bipolar disorder:  
HC:\$9701 (\$16021.85),  
Other severe mental illness:  
HCD:\$3024 (\$4994.34)

Quality: medium  
Classification: cost description

White et al[25]  
2003  
US

To evaluate the economic impact of antidepressant treatment adherence among patients treated for depression

Design: Retrospective database analysis  
Follow Up: 6 months  
Sample Size: 14190 (A:5638, NA:8552)

Measure: MPR  
Classification: MPR≥70% = adherent, MPR<70% = nonadherent  
Method of Assessment: pharmacy claims

Total costs  
Pharmacy costs  
Medical costs

Type of Costs: adjusted  
Classification: disease state specific  
Currency Year: USD, 1999  
Cost of Nonadherence:  
TC:\$11815 (\$16290.09)  
PC:\$1123 (\$1548.35),  
MC:\$10692 (\$14741.74)

Quality: medium  
Classification: cost description



|    |                          |                          |                               |                        |                 |                                               |
|----|--------------------------|--------------------------|-------------------------------|------------------------|-----------------|-----------------------------------------------|
| 1  |                          |                          |                               |                        |                 |                                               |
| 2  |                          |                          |                               |                        |                 |                                               |
| 3  |                          |                          |                               |                        |                 |                                               |
| 4  |                          |                          |                               |                        |                 |                                               |
| 5  |                          |                          | data                          |                        |                 |                                               |
| 6  | <b>Diabetes</b>          |                          |                               |                        |                 |                                               |
| 7  | <i>An et al</i> [26]     | This study evaluated     | <u>Design:</u> Prospective    | <u>Measure:</u> MPR    | Total costs     | <u>Type of Costs:</u> unadjusted              |
| 8  | 2014                     | the association          | cohort study                  | <u>Classification:</u> | Outpatient      | <u>Classification:</u> disease state specific |
| 9  | Korea                    | between medication       | <u>Follow Up:</u> 3 years     | MPR≥90% =              | costs           | <u>Currency Year:</u> USD, 2007               |
| 10 |                          | adherence and            | <u>Sample Size:</u> 608       | adherent,              | Hospitalization | <u>Cost of Nonadherence*:</u>                 |
| 11 |                          | clinical/economic        | (A:472, NA:136)               | MPR<90% =              | costs           | TC:\$1657.11 (\$1884.14)                      |
| 12 |                          | outcomes in patients     |                               | nonadherent            |                 | OC: \$1413.99 (\$1608.20),                    |
| 13 |                          | with type II diabetes    |                               | <u>Method of</u>       |                 | HC: \$243.11 (\$276.12)                       |
| 14 |                          | mellitus in the republic |                               | <u>Assessment:</u>     |                 |                                               |
| 15 |                          | of Korea over 3 year     |                               | pharmacy claims        |                 |                                               |
| 16 |                          | period.                  |                               | data                   |                 |                                               |
| 17 |                          |                          |                               |                        |                 |                                               |
| 18 | <i>Egede et al</i> [27]  | To examine the           | <u>Design:</u> Retrospective  | <u>Measure:</u> MPR    | Inpatient costs | <u>Type of Costs:</u> unadjusted              |
| 19 | 2012                     | longitudinal effects of  | cohort study                  | <u>Classification:</u> | Outpatient      | <u>Classification:</u> disease state specific |
| 20 | US                       | medication               | <u>Follow Up:</u> 5 years     | MPR≥80% =              | costs           | <u>Currency Year:</u> USD, 2006               |
| 21 |                          | nonadherence on key      | <u>Sample Size:</u> 740195    | adherent,              | Pharmacy        | <u>Cost of Nonadherence*:</u>                 |
| 22 |                          | costs and estimate       | (A:427390, NA:312805)         | MPR<80% =              | costs           | IC:\$14515.24 (\$17886.40)                    |
| 23 |                          | potential savings from   |                               | nonadherent            |                 | OC: \$3599.27 (\$4434.16),                    |
| 24 |                          | increased adherence      |                               | <u>Method of</u>       |                 | PC: \$1073.12 (\$1322.42)                     |
| 25 |                          | using novel              |                               | <u>Assessment:</u>     |                 |                                               |
| 26 |                          | methodology that         |                               | pharmacy claims        |                 |                                               |
| 27 |                          | accounts for shared      |                               | data                   |                 |                                               |
| 28 |                          | correlation among cost   |                               |                        |                 |                                               |
| 29 |                          | categories.              |                               |                        |                 |                                               |
| 30 |                          |                          |                               |                        |                 |                                               |
| 31 | <i>Gentil et al</i> [28] | To examine healthcare    | <u>Design:</u> Retrospective, | <u>Measure:</u> MPR    | Total costs     | <u>Type of Costs:</u> adjusted and unadjusted |
| 32 | 2015                     | costs associated with    | observational cohort          | <u>Classification:</u> | Inpatient costs | <u>Classification:</u> all cause and disease  |
| 33 | Canada                   | adherence to oral        | analysis                      | MPR≥80% =              | Outpatient      | state specific                                |
| 34 |                          | antihyperglycemic        | <u>Follow Up:</u> 1 year      | adherent,              | costs           | <u>Currency Year:</u> CAD, 2010               |
| 35 |                          | agents and the effects   | <u>Sample Size:</u> 301       | MPR<80% =              | Pharmacy        | <u>Cost of Nonadherence:</u>                  |
| 36 |                          | of depression and        | (A:224, NA:77)                | nonadherent            | costs           | Adjusted all cause:                           |
| 37 |                          | anxiety disorders on     |                               | <u>Method of</u>       | Physician       | TC:\$11124 (\$9818.67),                       |
| 38 |                          | these in older adults    |                               | <u>Assessment:</u>     | office visit    | IC:\$7419 (\$6548.43)                         |
| 39 |                          | with type 2 diabetes     |                               | pharmacy claims        | costs           | OC: \$2687 (\$2371.70),                       |
| 40 |                          |                          |                               |                        |                 |                                               |
| 41 |                          |                          |                               |                        |                 |                                               |
| 42 |                          |                          |                               |                        |                 |                                               |
| 43 |                          |                          |                               |                        |                 |                                               |
| 44 |                          |                          |                               |                        |                 |                                               |
| 45 |                          |                          |                               |                        |                 |                                               |
| 46 |                          |                          |                               |                        |                 |                                               |
| 47 |                          |                          |                               |                        |                 |                                               |
| 48 |                          |                          |                               |                        |                 |                                               |
| 49 |                          |                          |                               |                        |                 |                                               |

1  
2  
3  
4  
5  
6  
7  
8  
9  
10  
11  
12  
13  
14  
15  
16  
17  
18  
19  
20  
21  
22  
23  
24  
25  
26  
27  
28  
29  
30  
31  
32  
33  
34  
35  
36  
37  
38  
39  
40  
41  
42  
43  
44  
45  
46  
47  
48  
49

For peer review

Hagen et al[29]  
2014  
US

To evaluate the relationships between compliance with oral hypoglycemic agents and healthcare/ short term disability costs

Design: Retrospective, observational cohort analysis  
Follow Up: 1 year  
Sample Size: 4978 (A:2820, NA:2158)

Measure: PDC  
Classification: PDC≥80% = compliant, PDC<80% = noncompliant  
Method of Assessment: pharmacy claims data

Healthcare costs  
Pharmacy costs  
Medical costs  
Short term disability costs

data  
PC: \$504 (\$444.86),  
POC:\$513 (\$452.80)  
Adjusted disease state specific:  
TC:\$4477 (\$3951.65),  
IC:\$2836 (\$2503.21)  
OC: \$1518 (\$1339.87),  
PC<sup>###</sup>: \$-444 (\$-391.90),  
POC:\$568 (\$517.24)  
Unadjusted all cause:  
TC:\$14979 (\$13221.30),  
IC:\$6351 (\$5605.75)  
OC: \$4058 (\$3581.82),  
PC: \$3503 (\$3091.94),  
POC:\$1066 (\$940.91)  
Unadjusted disease state specific:  
TC:\$9008 (\$7950.97),  
IC:\$2854 (\$2519.10)  
OC: \$2654 (\$2342.57),  
PC: \$2498 (\$2204.87),  
POC:\$1002 (\$884.42)  
Type of Costs: adjusted and unadjusted  
Classification: all cause and disease state specific  
Currency Year: USD, 2003  
Cost of Nonadherence: Adjusted all cause:  
PC: \$1668 (\$2065.99),  
Adjusted disease state specific:  
HC:\$7642 (\$9465.39), PC:\$614 (\$760.50), MC:\$5974 (\$7399.40),  
STDC:\$1840 (\$2279.03)  
Unadjusted all cause:  
PC:\$1727 (\$2139.06)

Quality: medium  
Classification: cost description

|    |                          |                         |                               |                        |                                    |                                                       |
|----|--------------------------|-------------------------|-------------------------------|------------------------|------------------------------------|-------------------------------------------------------|
| 1  |                          |                         |                               |                        |                                    |                                                       |
| 2  |                          |                         |                               |                        |                                    |                                                       |
| 3  |                          |                         |                               |                        |                                    |                                                       |
| 4  |                          |                         |                               |                        |                                    |                                                       |
| 5  |                          |                         |                               |                        |                                    |                                                       |
| 6  |                          |                         |                               |                        | Unadjusted disease state specific: |                                                       |
| 7  |                          |                         |                               |                        | HC:\$6919 (\$8569.88), PC:\$785    |                                                       |
| 8  |                          |                         |                               |                        | (\$972.30), MC:\$5192 (\$6430.82), |                                                       |
| 9  |                          |                         |                               |                        | STDC:\$1717 (\$2126.68)            |                                                       |
| 10 | <i>Hansen et al</i> [30] | To compare all cause    | <u>Design:</u> Retrospective, | <u>Measure:</u> MPR    | Total                              | <u>Type of Costs:</u> adjusted and unadjusted         |
| 11 | 2010                     | total health care costs | cohort study                  | <u>Classification:</u> | Healthcare                         | <u>Classification:</u> all cause and disease          |
| 12 | US                       | and diabetes mellitus   | <u>Follow Up:</u> 2 years     | MPR≥80% =              | costs                              | state specific                                        |
| 13 |                          | specific health care    | <u>Sample Size:</u> 108592    | adherent,              | Inpatient costs                    | <u>Currency Year:</u> USD, 2005                       |
| 14 |                          | costs between patients  | (A:63830, NA:44762)           | MPR<80% =              | Outpatient                         | <u>Cost of Nonadherence<sup>#</sup>:</u> Adjusted all |
| 15 |                          | who were adherent or    |                               | nonadherent            | costs                              | cause:                                                |
| 16 |                          | non-adherent to         |                               | <u>Method of</u>       | Pharmacy                           | THC:\$13258 (\$15911.01)                              |
| 17 |                          | monotherapy with        |                               | <u>Assessment:</u>     | costs                              | Adjusted disease state specific:                      |
| 18 |                          | metformin,              |                               | pharmacy claims        |                                    | THC:\$2284 (\$2741.04)                                |
| 19 |                          | pioglitazone or a       |                               | data                   |                                    | Unadjusted all cause:                                 |
| 20 |                          | sulfonylurea and to     |                               |                        |                                    | THC:\$15448.50 (\$18539.90),                          |
| 21 |                          | examine whether cost    |                               |                        |                                    | IC:\$4242.33 (\$5091.25),                             |
| 22 |                          | differences varied      |                               |                        |                                    | OC:\$ 7377.83, PC:\$3828 (\$4594.01)                  |
| 23 |                          | among patients using    |                               |                        |                                    | Unadjusted disease state specific:                    |
| 24 |                          | these oral antidiabetic |                               |                        |                                    | THC:\$3232.33 (\$3879.15), IC:\$873.50                |
| 25 |                          | drugs.                  |                               |                        |                                    | (\$1048.29), OC:\$1545.67(\$1854.96),                 |
| 26 |                          |                         |                               |                        |                                    | PC:\$812.67 (\$975.29)                                |
| 27 |                          |                         |                               |                        |                                    |                                                       |
| 28 | <i>Hong et al</i> [31]   | To assess the           | <u>Design:</u> Retrospective, | <u>Measure:</u> MPR    | Total costs                        | <u>Type of Costs:</u> unadjusted                      |
| 29 | 2011                     | relationship between    | cohort study                  | <u>Classification:</u> | Hospitalization                    | <u>Classification:</u> disease state specific         |
| 30 | South Korea              | initial adherence to    | <u>Follow Up:</u> 3 years     | MPR≥80% =              | costs                              | <u>Currency Year:</u> KRW, 2007                       |
| 31 |                          | oral antihyperglycemic  | <u>Sample Size:</u> 40082     | adherent,              |                                    | <u>Cost of Nonadherence:</u>                          |
| 32 |                          | medications and         | (A:11800, NA:28282)           | MPR<80% =              |                                    | TC:₩765453 (\$1142.31),                               |
| 33 |                          | subsequent health       |                               | nonadherent            |                                    | HC:₩397549 (\$593.28)                                 |
| 34 |                          | outcomes.               |                               | <u>Method of</u>       |                                    |                                                       |
| 35 |                          |                         |                               | <u>Assessment:</u>     |                                    |                                                       |
| 36 |                          |                         |                               | pharmacy claims        |                                    |                                                       |
| 37 |                          |                         |                               | data                   |                                    |                                                       |
| 38 |                          |                         |                               |                        |                                    |                                                       |
| 39 | <i>Jha et al</i> [32]    | How often do            | <u>Design:</u> Retrospective, | <u>Measure:</u> MPR    | Total costs                        | <u>Type of Costs:</u> adjusted                        |
| 40 | 2012                     | previously non-         | observational claims          | <u>Classification:</u> | ED costs                           | <u>Classification:</u> disease state specific         |
| 41 |                          |                         |                               |                        |                                    | <u>Quality:</u> high                                  |
| 42 |                          |                         |                               |                        |                                    | <u>Classification:</u> cost                           |
| 43 |                          |                         |                               |                        |                                    | description                                           |
| 44 |                          |                         |                               |                        |                                    |                                                       |
| 45 |                          |                         |                               |                        |                                    |                                                       |
| 46 |                          |                         |                               |                        |                                    |                                                       |
| 47 |                          |                         |                               |                        |                                    |                                                       |
| 48 |                          |                         |                               |                        |                                    |                                                       |
| 49 |                          |                         |                               |                        |                                    |                                                       |

|    |                 |                         |                               |                        |                 |                                               |                             |
|----|-----------------|-------------------------|-------------------------------|------------------------|-----------------|-----------------------------------------------|-----------------------------|
| 1  |                 |                         |                               |                        |                 |                                               |                             |
| 2  |                 |                         |                               |                        |                 |                                               |                             |
| 3  |                 |                         |                               |                        |                 |                                               |                             |
| 4  |                 |                         |                               |                        |                 |                                               |                             |
| 5  | US              | adherent patients       | analysis                      | MPR≥80% =              | Hospitalization | <u>Currency Year:</u> USD, 2011               | outcome                     |
| 6  |                 | become adherent and     | <u>Follow Up:</u> unclear     | adherent,              | costs           | <u>Cost of Nonadherence***:</u>               | description                 |
| 7  |                 | vice versa?             | <u>Sample Size:</u> 135639    | MPR<80% =              |                 | TC:\$4680000000 (\$5006563305.49),            |                             |
| 8  |                 | Are changes in          | (A:99976, NA:36553)           | nonadherent            |                 | EDC:\$735000000 (\$786287185.80),             |                             |
| 9  |                 | adherence associated    |                               | <u>Method of</u>       |                 | HC:\$3950000000 (\$4225625012.11)             |                             |
| 10 |                 | with increased or       |                               | <u>Assessment:</u>     |                 |                                               |                             |
| 11 |                 | decreased               |                               | pharmacy claims        |                 |                                               |                             |
| 12 |                 | hospitalizations or     |                               | data                   |                 |                                               |                             |
| 13 |                 | emergency               |                               |                        |                 |                                               |                             |
| 14 |                 | department visits?      |                               |                        |                 |                                               |                             |
| 15 |                 | Are there certain       |                               |                        |                 |                                               |                             |
| 16 |                 | subgroups of            |                               |                        |                 |                                               |                             |
| 17 |                 | populations that seem   |                               |                        |                 |                                               |                             |
| 18 |                 | to benefit more than    |                               |                        |                 |                                               |                             |
| 19 |                 | others when they        |                               |                        |                 |                                               |                             |
| 20 |                 | adhere to their         |                               |                        |                 |                                               |                             |
| 21 |                 | medication?             |                               |                        |                 |                                               |                             |
| 22 |                 | What are the financial  |                               |                        |                 |                                               |                             |
| 23 |                 | implications of changes |                               |                        |                 |                                               |                             |
| 24 |                 | in adherence for the    |                               |                        |                 |                                               |                             |
| 25 |                 | nation at large and for |                               |                        |                 |                                               |                             |
| 26 |                 | Medicare?               |                               |                        |                 |                                               |                             |
| 27 |                 |                         |                               |                        |                 |                                               |                             |
| 28 |                 |                         |                               |                        |                 |                                               |                             |
| 29 | White et al[33] | To assess the           | <u>Design:</u> Retrospective, | <u>Measure:</u> MPR    | Total costs     | <u>Type of Costs:</u> adjusted and unadjusted | <u>Quality:</u> low         |
| 30 | 2004            | relationship between    | database analysis             | <u>Classification:</u> | Pharmacy        | <u>Classification:</u> disease state specific | <u>Classification:</u> cost |
| 31 | US              | diabetic medication     | <u>Follow Up:</u> 1 year      | MPR≥95%,               | costs           | <u>Currency Year:</u> USD, 2000               | analysis                    |
| 32 |                 | adherence, total        | <u>Sample Size:</u> 67029     | MPR>75%<95%,           | Non-pharmacy    | <u>Cost of Nonadherence:</u> adjusted:        |                             |
| 33 |                 | healthcare costs and    | (>95:20170, 75-95:            | MPR<75%                | costs           | TC(≥95):\$4835 (\$6518.17),                   |                             |
| 34 |                 | utilisation with        | 14074, <75:16713)             | <u>Method of</u>       |                 | TC(75-95):\$5314 (\$7163.92),                 |                             |
| 35 |                 | patients with type 2    |                               | <u>Assessment:</u>     |                 | TC(<75):\$5706 (\$7692.38),                   |                             |
| 36 |                 | diabetes mellitus and   |                               | pharmacy claims        |                 | PC(≥95):\$1429 (\$1926.47),                   |                             |
| 37 |                 | concomitant diabetes    |                               | data                   |                 | PC(75-95):\$1157 (\$1559.78),                 |                             |
| 38 |                 | and cardiovascular      |                               |                        |                 | PC(<75):\$762 (\$1027.27),                    |                             |
| 39 |                 | disease.                |                               |                        |                 | NPC(≥95):\$3406 (\$4591.70),                  |                             |
| 40 |                 |                         |                               |                        |                 |                                               |                             |
| 41 |                 |                         |                               |                        |                 |                                               |                             |
| 42 |                 |                         |                               |                        |                 |                                               |                             |
| 43 |                 |                         |                               |                        |                 |                                               |                             |
| 44 |                 |                         |                               |                        |                 |                                               |                             |
| 45 |                 |                         |                               |                        |                 |                                               |                             |
| 46 |                 |                         |                               |                        |                 |                                               |                             |
| 47 |                 |                         |                               |                        |                 |                                               |                             |
| 48 |                 |                         |                               |                        |                 |                                               |                             |
| 49 |                 |                         |                               |                        |                 |                                               |                             |

1  
2  
3  
4  
5  
6  
7  
8  
9  
10  
11  
12  
13  
14  
15  
16  
17  
18  
19  
20  
21  
22  
23  
24  
25  
26  
27  
28  
29  
30  
31  
32  
33  
34  
35  
36  
37  
38  
39  
40  
41  
42  
43  
44  
45  
46  
47  
48  
49

For peer review only

Wu et al[34]  
2009  
US

To examine the predictors of duloxetine compliance and its association with healthcare costs among diabetic peripheral neuropathic pain (DPNP) patients.

Design: Retrospective, cohort study  
Follow Up: 1 year  
Sample Size: 2354 (A:830, NA:1524)

Measure: MPR  
Classification: MPR≥80%= high compliance, MPR<80% = low compliance  
Subgroup  
Analysis: commercial and Medicare supplemental  
Method of Assessment: pharmacy claims data

Total healthcare costs  
Inpatient costs  
Outpatient costs  
Pharmacy costs

NPC(75-95):\$4157 (\$5604.14),  
NPC(<75):\$4944 (\$6665.11)  
Unadjusted:  
TC(≥95):\$4809 (\$6483.12),  
TC(75-95):\$5333 (\$7189.53),  
TC(<75):\$5605 (\$7556.22),  
PC(≥95):\$1402 (\$1890.07),  
PC(75-95):\$1153 (\$1554.38),  
PC(<75):\$766 (\$1032.66),  
NPC(≥95):\$3407 (\$4593.05),  
NPC(75-95):\$4180 (\$5635.15),  
NPC(<75):\$4839 (\$6523.56)  
Type of Costs: adjusted  
Classification: all cause and disease state specific  
Currency Year: USD, 2006  
Cost of Nonadherence: adjusted all cause:  
THC(com):\$32407 (\$37732.29),  
THC(med):\$24622 (\$28668.02),  
IC(com):\$ 12851(\$14692.74),  
IC(med):\$ 6754 (\$7863.85),  
OC(com):\$11888 (\$13841.50),  
OC(med):\$10598 (\$12339.52),  
PC(com):\$7667 (\$8926.88),  
PC(med):\$7270 (\$8464.65)  
Adjusted disease state specific:  
Diabetes:  
THC(com):\$10024 (\$11671.20),  
THC(med):\$5015 (\$5839.09),  
IC(com):\$2232 (\$2598.77),  
IC(med):\$2606 (\$3034.23),  
OC(com):\$1989 (\$2315.84),

Quality: medium  
Classification: cost description

1  
2  
3  
4  
5  
6  
7  
8  
9  
10  
11  
12  
13  
14  
15  
16  
17  
18  
19  
20  
21  
22  
23  
24  
25  
26  
27  
28  
29  
30  
31  
32  
33  
34  
35  
36  
37  
38  
39  
40  
41  
42  
43  
44  
45  
46  
47  
48  
49

For peer review

OC(med):\$1231 (\$1433.28),  
PC(com):\$1451 (\$1689.44),  
PC(med):\$1179 (\$1372.74)  
DPNP:  
THC(com):\$3565 (\$4150.82),  
THC(med):\$2384 (\$2775.75),  
IC(com):\$1739 (\$2024.76),  
IC(med):\$1048 (\$1220.21),  
OC(com):\$362 (\$421.49),  
OC(med):\$181 (\$210.74),  
PC(com):\$1464 (\$1704.57)  
PC(med):\$1155 (\$1344.80)

**Osteoporosis**

|                                                    |                                                                                                                                                     |                                                                                                                               |                                                                                                                                                                                                                                     |                                                                                |                                                                                                                                                                                                                                                                                                                                                                                                                                                                                                                                                                                                                                                                                                                                                       |                                                                           |
|----------------------------------------------------|-----------------------------------------------------------------------------------------------------------------------------------------------------|-------------------------------------------------------------------------------------------------------------------------------|-------------------------------------------------------------------------------------------------------------------------------------------------------------------------------------------------------------------------------------|--------------------------------------------------------------------------------|-------------------------------------------------------------------------------------------------------------------------------------------------------------------------------------------------------------------------------------------------------------------------------------------------------------------------------------------------------------------------------------------------------------------------------------------------------------------------------------------------------------------------------------------------------------------------------------------------------------------------------------------------------------------------------------------------------------------------------------------------------|---------------------------------------------------------------------------|
| <p><i>Briesacher et al</i>[35]<br/>2007<br/>US</p> | <p>To assess rates of osteoporotic fractures and health care utilisation as a function of bisphosphonate compliance in usual clinical practice.</p> | <p><u>Design:</u> Retrospective, cohort study<br/><u>Follow Up:</u> 3 years<br/><u>Sample Size:</u> 17988 (not specified)</p> | <p><u>Measure:</u> MPR<br/><u>Classification:</u> 80-100% = adherent, 60-79% = moderate adherence, 40-59% = moderate adherence, 20-39% = nonadherent, 0-19% = nonadherent<br/><u>Method of Assessment:</u> pharmacy claims data</p> | <p>Total costs<br/>Inpatient costs<br/>Outpatient costs<br/>Pharmacy costs</p> | <p><u>Type of Costs:</u> adjusted and unadjusted<br/><u>Classification:</u> disease state specific<br/><u>Currency Year:</u> USD, 2004<br/><u>Cost of Nonadherence ****:</u> adjusted:<br/>TC(80-100):-\$859 (-\$1063.96),<br/>TC(60-79):-\$474 (-\$587.10),<br/>TC(40-59):-\$366 (-\$453.33),<br/>TC(20-39):\$151 (\$187.03),<br/>IC(80-100):-\$3233 (-\$4004.40),<br/>IC(60-79):-\$856(-\$1060.24),<br/>IC(40-59):-\$6221 (-\$7705.34),<br/>IC(20-39):-\$585 (-\$724.58),<br/>OC(80-100):-\$445 (-\$551.18),<br/>OC(60-79):-\$538 (-\$666.37),<br/>OC(40-59):-\$236 (-\$292.31),<br/>OC(20-39):\$60 (\$74.32),<br/>PC(80-100):\$997 (\$1234.89),<br/>PC(60-79):\$923 (\$1143.23),<br/>PC(40-59):\$402 (\$497.92),<br/>PC(20-39):\$160(\$198.18)</p> | <p><u>Quality:</u> medium<br/><u>Classification:</u> cost description</p> |
|----------------------------------------------------|-----------------------------------------------------------------------------------------------------------------------------------------------------|-------------------------------------------------------------------------------------------------------------------------------|-------------------------------------------------------------------------------------------------------------------------------------------------------------------------------------------------------------------------------------|--------------------------------------------------------------------------------|-------------------------------------------------------------------------------------------------------------------------------------------------------------------------------------------------------------------------------------------------------------------------------------------------------------------------------------------------------------------------------------------------------------------------------------------------------------------------------------------------------------------------------------------------------------------------------------------------------------------------------------------------------------------------------------------------------------------------------------------------------|---------------------------------------------------------------------------|

1  
2  
3  
4  
5  
6  
7  
8  
9  
10  
11  
12  
13  
14  
15  
16  
17  
18  
19  
20  
21  
22  
23  
24  
25  
26  
27  
28  
29  
30  
31  
32  
33  
34  
35  
36  
37  
38  
39  
40  
41  
42  
43  
44  
45  
46  
47  
48  
49

For peer review only

Eisenberg et al[36]  
2015  
US

To determine healthcare outcomes associated with compliance and noncompliance to bisphosphonate therapy in women diagnosed with osteoporosis

Design: Retrospective claims study  
Follow Up: 2 years  
Sample Size: 27905 (A:11368, NA:16537)

Measure: MPR  
Classification: (≥70% = compliant, <70% = noncompliant)  
Method of Assessment: pharmacy claims data

Total costs  
Inpatient costs  
Outpatient costs  
ED costs  
Pharmacy costs  
Physician office visit costs

Unadjusted:  
TC(80-100):-\$1273 (-\$1576.74),  
TC(60-79):-\$294 (-\$364.15),  
TC(40-59):-\$573 (-\$709.72),  
TC(20-39):\$101 (\$125.10),  
IC(80-100):-\$883 (-\$1093.68),  
IC(60-79):-\$384 (-\$475.62),  
IC(40-59):-\$597 (-\$739.44),  
IC(20-39):-\$93 (-\$115.19),  
OC(80-100):-\$774 (-\$958.68),  
OC(60-79):-\$193 (-\$239.05),  
OC(40-59):-\$145 (-\$179.60),  
OC(20-39):\$148 (\$183.31),  
PC(80-100):\$384 (\$475.62),  
PC(60-79):\$284 (\$351.76),  
PC(40-59):\$170 (\$210.56),  
PC(20-39):\$48 (\$59.45)

Type of Costs: unadjusted  
Classification: all cause and disease state specific  
Currency Year: USD, 2012  
Cost of Nonadherence: all cause:  
TC:\$7237 (\$7550.72),  
IC:\$1986 (\$2072.09),  
OC:\$2057 (\$2146.17),  
EDC:\$258 (\$269.18),  
PC:\$2197 (\$2292.24),  
POC:\$738 (\$769.99)  
Disease state specific:  
TC:\$674 (\$703.22),  
IC:\$334 (\$348.48),  
OC:\$77 (\$80.34),  
EDC:\$5 (\$5.22),

Quality: medium  
Classification: cost description

|    |                                   |                        |                              |                        |                      |                                                   |                             |
|----|-----------------------------------|------------------------|------------------------------|------------------------|----------------------|---------------------------------------------------|-----------------------------|
| 1  |                                   |                        |                              |                        |                      |                                                   |                             |
| 2  |                                   |                        |                              |                        |                      |                                                   |                             |
| 3  |                                   |                        |                              |                        |                      |                                                   |                             |
| 4  |                                   |                        |                              |                        |                      |                                                   |                             |
| 5  |                                   |                        |                              |                        |                      |                                                   |                             |
| 6  |                                   |                        |                              |                        | PC:\$213 (\$222.23), |                                                   |                             |
| 7  |                                   |                        |                              |                        | POC:\$44 (\$45.91)   |                                                   |                             |
| 8  | <i>Halpern et al</i> [37]         | To examine the         | <u>Design:</u> Retrospective | <u>Measure:</u> MPR    | Medical costs        | <u>Type of Costs:</u> unadjusted                  | <u>Quality:</u> medium      |
| 9  | 2011                              | associations of        | analysis                     | <u>Classification:</u> |                      | <u>Classification:</u> all cause                  | <u>Classification:</u> cost |
| 10 | US                                | adherence to           | <u>Follow Up:</u> 540 days   | (≥80% = high           |                      | <u>Currency Year:</u> USD, 2006                   | outcome                     |
| 11 |                                   | osteoporosis therapies | <u>Sample Size:</u> 21655    | adherence,             |                      | <u>Cost of Nonadherence:</u> commercial:          | description                 |
| 12 |                                   | with occurrence of     | (≥80%:8759,                  | ≥50<80% =              |                      | MC(≥80):\$4295 (\$5000.78),                       |                             |
| 13 |                                   | closed fracture, all   | ≥50<80%:5237,                | moderate               |                      | MC(50-80):\$4697 (\$5468.84),                     |                             |
| 14 |                                   | cause medical costs    | <50%:7659)                   | adherence, <50%        |                      | MC(<50):\$5596 (\$6515.56)                        |                             |
| 15 |                                   | and all cause          |                              | = low adherence        |                      | Medicare:                                         |                             |
| 16 |                                   | hospitalizations.      |                              | <u>Method of</u>       |                      | MC(≥80):\$4590 (\$5344.25),                       |                             |
| 17 |                                   |                        |                              | <u>Assessment:</u>     |                      | MC(50-80):\$5536 (\$6445.71),                     |                             |
| 18 |                                   |                        |                              | pharmacy claims        |                      | MC(<50):\$5801 (\$6754.25)                        |                             |
| 19 |                                   |                        |                              | data                   |                      |                                                   |                             |
| 20 | <i>Hazel-Fernandez et al</i> [38] | To evaluate the        | <u>Design:</u> Retrospective | <u>Measure:</u> PDC    | Total                | <u>Type of Costs:</u> unadjusted                  | <u>Quality:</u> medium      |
| 21 | 2013                              | healthcare utilisation | cohort study                 | <u>Classification:</u> | healthcare           | <u>Classification:</u> disease state specific and | <u>Classification:</u> cost |
| 22 | US                                | patterns of medicare   | <u>Follow Up:</u> 12 months  | (≥80% = high           | costs                | fracture related                                  | outcome                     |
| 23 |                                   | part D beneficiaries   | <u>Sample Size:</u> 761      | adherence,             | Inpatient costs      | <u>Currency Year:</u> USD, 2010                   | description                 |
| 24 |                                   | newly initiating       | (≥80%:163,                   | ≥50<80% =              | Outpatient           | <u>Cost of Nonadherence</u> *:                    |                             |
| 25 |                                   | teriparatide and to    | ≥50<80%:57,                  | moderate               | costs                | Disease state specific:                           |                             |
| 26 |                                   | assess the association | <50%:541)                    | adherence, <50%        | ED costs             | THC(≥80):\$21033 (\$22942.39),                    |                             |
| 27 |                                   | of medication          |                              | = low adherence        | Pharmacy             | THC(50-80):\$25574 (\$27895.62),                  |                             |
| 28 |                                   | adherence and          |                              | <u>Method of</u>       | costs                | THC(<50):\$15528 (\$16937.64),                    |                             |
| 29 |                                   | persistence with bone  |                              | <u>Assessment:</u>     |                      | IC(≥80):\$2198 (\$2397.54),                       |                             |
| 30 |                                   | fracture.              |                              | pharmacy claims        |                      | IC(50-80):\$8448 (\$9214.91),                     |                             |
| 31 |                                   |                        |                              | data                   |                      | IC(<50):\$4897 (\$5341.55),                       |                             |
| 32 |                                   |                        |                              |                        |                      | OC(≥80):\$5151 (\$5618.61),                       |                             |
| 33 |                                   |                        |                              |                        |                      | OC(50-80):\$6439 (\$7023.54),                     |                             |
| 34 |                                   |                        |                              |                        |                      | OC(<50):\$5806 (\$6333.07),                       |                             |
| 35 |                                   |                        |                              |                        |                      | EDC(≥80):\$211 (\$230.15),                        |                             |
| 36 |                                   |                        |                              |                        |                      | EDC(50-80):\$330 (\$359.96),                      |                             |
| 37 |                                   |                        |                              |                        |                      | EDC(<50):\$465 (\$507.21),                        |                             |
| 38 |                                   |                        |                              |                        |                      | PC(≥80):\$13472 (\$14695),                        |                             |
| 39 |                                   |                        |                              |                        |                      |                                                   |                             |
| 40 |                                   |                        |                              |                        |                      |                                                   |                             |
| 41 |                                   |                        |                              |                        |                      |                                                   |                             |
| 42 |                                   |                        |                              |                        |                      |                                                   |                             |
| 43 |                                   |                        |                              |                        |                      |                                                   |                             |
| 44 |                                   |                        |                              |                        |                      |                                                   |                             |
| 45 |                                   |                        |                              |                        |                      |                                                   |                             |
| 46 |                                   |                        |                              |                        |                      |                                                   |                             |
| 47 |                                   |                        |                              |                        |                      |                                                   |                             |
| 48 |                                   |                        |                              |                        |                      |                                                   |                             |
| 49 |                                   |                        |                              |                        |                      |                                                   |                             |



1  
2  
3  
4  
5  
6  
7  
8  
9  
10  
11  
12  
13  
14  
15  
16  
17  
18  
19  
20  
21  
22  
23  
24  
25  
26  
27  
28  
29  
30  
31  
32  
33  
34  
35  
36  
37  
38  
39  
40  
41  
42  
43  
44  
45  
46  
47  
48  
49

For peer review only

PC(50-80):\$10358 (\$11298.31),  
PC(<50):\$4361 (\$4756.89)  
Fracture related:  
THC(≥80):\$12670 (\$13820.19),  
THC(50-80):\$9292 (\$10135.53),  
THC(<50):\$4419 (\$4820.16),  
IC(≥80):\$366 (\$399.23),  
IC(50-80):\$830 (\$905.35),  
IC(<50):\$1325 (\$1445.28),  
OC(≥80):\$1048 (\$1143.14),  
OC(50-80):\$955 (\$1041.70),  
OC(<50):\$767 (\$836.63),  
EDC(≥80):\$6 (\$6.54),  
EDC(50-80):\$9 (\$9.82),  
EDC(<50):\$44 (\$47.99),  
PC(≥80):\$10810 (\$11791.34),  
PC(50-80):\$7420 (\$8093.59),  
PC(<50):\$2068 (\$2255.73)

|                                                       |                                                                                                                                                  |                                                                                                                                 |                                                                                                                                                        |                                                              |                                                                                                                                                                                                                                                   |                                                                                 |
|-------------------------------------------------------|--------------------------------------------------------------------------------------------------------------------------------------------------|---------------------------------------------------------------------------------------------------------------------------------|--------------------------------------------------------------------------------------------------------------------------------------------------------|--------------------------------------------------------------|---------------------------------------------------------------------------------------------------------------------------------------------------------------------------------------------------------------------------------------------------|---------------------------------------------------------------------------------|
| <p><i>Huybrechts et al[39]</i><br/>2006<br/>US</p>    | <p>To evaluate non-compliance with osteoporosis medications as well as its implications for health and economic outcomes in actual practice.</p> | <p><u>Design:</u> Retrospective cohort study<br/><u>Follow Up:</u> 5 years<br/><u>Sample Size:</u> 38120 (A:9530, NA:28590)</p> | <p><u>Measure:</u> MPR<br/><u>Classification:</u> (≥80% = compliant, &lt;50% = noncompliant)<br/><u>Method of Assessment:</u> pharmacy claims data</p> | <p>Total costs<br/>Medical costs<br/>Institutional costs</p> | <p><u>Type of Costs:</u> unadjusted<br/><u>Classification:</u> disease state specific<br/><u>Currency Year:</u> USD, 2000<br/><u>Cost of Nonadherence:</u><br/>TC:\$7200 (\$9706.44),<br/>MC:\$1476 (\$1989.84),<br/>InstC:\$5736 (\$7732.80)</p> | <p><u>Quality:</u> low<br/><u>Classification:</u> cost description</p>          |
| <p><i>Kjellberget al[40]</i><br/>2016<br/>Denmark</p> | <p>To estimate the rate of oral bisphosphonate compliance among Danish women and to examine the association of</p>                               | <p><u>Design:</u> Retrospective cohort study<br/><u>Follow Up:</u> 1 year<br/><u>Sample Size:</u> 38234 (A:26806, NA:11428)</p> | <p><u>Measure:</u> MPR<br/><u>Classification:</u> (≥70% = compliant, &lt;70% = noncompliant)<br/><u>Method of</u></p>                                  | <p>Total costs<br/>Medical costs</p>                         | <p><u>Type of Costs:</u> adjusted<br/><u>Classification:</u> all cause and disease state specific<br/><u>Currency Year:</u> Euro, 2011<br/><u>Cost of Nonadherence:</u> all cause:<br/>TC:€4933 (\$6209.58),</p>                                  | <p><u>Quality:</u> high<br/><u>Classification:</u> cost outcome description</p> |

1  
2  
3  
4  
5  
6  
7  
8  
9  
10  
11  
12  
13  
14  
15  
16  
17  
18  
19  
20  
21  
22  
23  
24  
25  
26  
27  
28  
29  
30  
31  
32  
33  
34  
35  
36  
37  
38  
39  
40  
41  
42  
43  
44  
45  
46  
47  
48  
49

|                                    |                                                                                                                                |                                                                                                                            |                                                                                                                                                                   |                                                                                                                  |                                                                                                                                                                                                                                                                                                                                                                                                                                                                                                                                                                                                                                             |                                                                           |
|------------------------------------|--------------------------------------------------------------------------------------------------------------------------------|----------------------------------------------------------------------------------------------------------------------------|-------------------------------------------------------------------------------------------------------------------------------------------------------------------|------------------------------------------------------------------------------------------------------------------|---------------------------------------------------------------------------------------------------------------------------------------------------------------------------------------------------------------------------------------------------------------------------------------------------------------------------------------------------------------------------------------------------------------------------------------------------------------------------------------------------------------------------------------------------------------------------------------------------------------------------------------------|---------------------------------------------------------------------------|
|                                    | noncompliance with health care resource use and cost.                                                                          |                                                                                                                            | <u>Assessment:</u><br>pharmacy claims data                                                                                                                        |                                                                                                                  | MC:€3471 (\$4369.20),<br>Disease state specific:<br>TC:€754 (\$949.12),<br>MC:€426 (\$536.24),<br><u>Type of Costs:</u> unadjusted<br><u>Classification:</u> all cause and disease state specific<br><u>Currency Year:</u> USD, 2011<br><u>Cost of Nonadherence:</u> all cause:<br>TC:\$11749 (\$12484.12),<br>IC:\$8768 (\$9316.60),<br>OC:\$3945 (\$4191.83),<br>EDC:\$104 (\$110.51),<br>PC:\$2981 (\$3167.52),<br>MC:\$8768 (\$9316.60),<br>OtC:\$997 (\$1059.38)<br>Disease state specific:<br>TC:\$630 (\$669.42),<br>IC:\$443 (\$470.72),<br>OC:\$158 (\$167.89),<br>EDC:\$3 (\$3.19),<br>PC:\$325 (\$345.33),<br>OtC:\$26 (\$27.63) | <u>Quality:</u> medium<br><u>Classification:</u> cost outcome description |
| Modi et al[41]<br>2015<br>US       | To evaluate compliance with osteoporosis treatments and determine fracture and healthcare burden associated with noncompliance | <u>Design:</u> Retrospective cohort study<br><u>Follow Up:</u> 1 year<br><u>Sample Size:</u> 27913 (A:23430, NA:34483)     | <u>Measure:</u> MPR<br><u>Classification:</u> (≥80% = compliant, <80% = noncompliant)<br><u>Method of Assessment:</u> healthcare claims data                      | Total costs<br>Inpatient costs<br>Outpatient costs<br>ED costs<br>Pharmacy costs<br>Medical costs<br>Other costs |                                                                                                                                                                                                                                                                                                                                                                                                                                                                                                                                                                                                                                             |                                                                           |
| Olsen et al[42]<br>2013<br>Denmark | To assess the association between refill compliance and all cause health care costs.                                           | <u>Design:</u> Retrospective observational study<br><u>Follow Up:</u> 2 years<br><u>Sample Size:</u> 47176 (not specified) | <u>Measure:</u> MPR<br><u>Classification:</u> (≥80% = optimal compliance, >50<80% = suboptimal compliance, <50% = low compliance)<br><u>Method of Assessment:</u> | Fracture costs                                                                                                   | <u>Type of Costs:</u> unadjusted<br><u>Classification:</u> fracture site specific<br><u>Currency Year:</u> DKK, 2010<br><u>Cost of Nonadherence:</u><br>Hip fracture:<br>FC(50-80):kr817575.50 (\$74531.41),<br>FC(<50):kr4454954 (\$549987.04)<br>Spine fracture:<br>FC(50-80):kr174700 (\$21568.12),<br>FC(<50):kr226472 (\$27959.14)                                                                                                                                                                                                                                                                                                     | <u>Quality:</u> medium<br><u>Classification:</u> cost analysis            |

1  
2  
3  
4  
5  
6  
7  
8  
9  
10  
11  
12  
13  
14  
15  
16  
17  
18  
19  
20  
21  
22  
23  
24  
25  
26  
27  
28  
29  
30  
31  
32  
33  
34  
35  
36  
37  
38  
39  
40  
41  
42  
43  
44  
45  
46  
47  
48  
49

|                                        |                                                                                                                                                                                                                           |                                                                                                                                   |                                                                                                                                               |                                                                                                                |                                                                                                                                                                                                                                                                                                                                                                                                                                                                                                                                          |                                                                     |
|----------------------------------------|---------------------------------------------------------------------------------------------------------------------------------------------------------------------------------------------------------------------------|-----------------------------------------------------------------------------------------------------------------------------------|-----------------------------------------------------------------------------------------------------------------------------------------------|----------------------------------------------------------------------------------------------------------------|------------------------------------------------------------------------------------------------------------------------------------------------------------------------------------------------------------------------------------------------------------------------------------------------------------------------------------------------------------------------------------------------------------------------------------------------------------------------------------------------------------------------------------------|---------------------------------------------------------------------|
|                                        |                                                                                                                                                                                                                           |                                                                                                                                   | pharmacy claims data                                                                                                                          |                                                                                                                | Humerus fracture:<br>FC(50-80):kr117776.50 (\$14540.12),<br>FC(<50):kr795217.50 (\$98173.70)<br>Forearm fracture:<br>FC(50-80):-kr463024 (-\$57162.70),<br>FC(<50):kr45072.50 (\$8665.81)<br>Other fracture:<br>FC(50-80):-kr19261.50 (-\$2377.93),<br>FC(<50):kr684067.50 (\$84451.66)                                                                                                                                                                                                                                                  |                                                                     |
| <i>Sunycz et al</i> [43]<br>2008<br>US | To examine the relationship between persistence and compliance with bisphosphonate therapy and total and osteoporosis related costs and healthcare resource utilisation in a cohort of female bisphosphonate naïve users. | <u>Design</u> : Retrospective observational study<br><u>Follow Up</u> : 3 years<br><u>Sample Size</u> : 32944 (A:12186, NA:20758) | <u>Measure</u> : MPR<br><u>Classification</u> : (≥80% = compliant, <80% = noncompliant)<br><u>Method of Assessment</u> : pharmacy claims data | Total healthcare costs<br>Inpatient costs<br>Outpatient costs<br>ED costs<br>Pharmacy costs<br>Radiology costs | <u>Type of Costs</u> : unadjusted<br><u>Classification</u> : all cause and disease state specific<br><u>Currency Year</u> : USD, 2005<br><u>Cost of Nonadherence</u> :<br>All cause:<br>THC:\$23660 (\$28394.52),<br>IC:\$18839 (\$22608.81),<br>OC:\$10061 (\$12074.27),<br>EDC:\$832 (\$988.49),<br>PC:\$6941 (\$8329.94),<br>RC:\$1079 (\$1294.91)<br>Disease state specific:<br>THC:\$1602 (\$1922.57),<br>IC:\$14074 (\$16890.30),<br>OC:\$501 (\$601.25),<br>EDC:\$452 (\$542.45),<br>PC:\$918 (\$1101.70),<br>RC:\$184 (\$220.82) | <u>Quality</u> : low<br><u>Classification</u> : cost description    |
| <i>Zhao et al</i> [44]<br>2014<br>US   | To examine the association between teriparatide adherence and healthcare utilisation and costs                                                                                                                            | <u>Design</u> : Retrospective cohort study<br><u>Follow Up</u> : 36 months<br><u>Sample Size</u> : 824 (≥80:362, 50-80%:219,      | <u>Measure</u> : PDC<br><u>Classification</u> : (≥80% = high, 50-80% = medium, <50% = low)                                                    | Total healthcare costs<br>Inpatient costs<br>Outpatient                                                        | <u>Type of Costs</u> : adjusted and unadjusted<br><u>Classification</u> : disease state specific<br><u>Currency Year</u> : USD, 2010<br><u>Cost of Nonadherence</u> :<br>Adjusted:                                                                                                                                                                                                                                                                                                                                                       | <u>Quality</u> : medium<br><u>Classification</u> : cost description |

among hip fracture patients. <50%:243)

Method of Assessment: pharmacy claims data

costs Pharmacy costs

THC(≥80):\$34428 (\$37553.4),  
 THC(50-80):\$37956 (\$41401.68),  
 THC(<50):\$31188 (\$34019.28),  
 IC(≥80):\$7548 (\$8233.20),  
 IC(50-80):\$11520 (\$1256.80),  
 IC(<50):\$11556 (\$12605.04),  
 OC(≥80):\$9312 (\$10157.40),  
 OC(50-80):\$12816 (\$13979.40),  
 OC(<50):\$13044 (\$14228.16),  
 PC(≥80):\$18864 (\$20576.52),  
 PC(50-80):\$13116 (\$14306.64),  
 PC(<50):\$7452 (\$8128.44)

Unadjusted:  
 THC(≥80):\$37464 (\$40865.04),  
 THC(50-80):\$35076 (\$38260.20),  
 THC(<50):\$29484 (\$32160.60),  
 IC(≥80):\$7092 (\$7735.80),  
 IC(50-80):\$11100 (\$12107.64),  
 IC(<50):\$10632 (\$11597.16),  
 OC(≥80):\$9900 (\$10798.68),  
 OC(50-80):\$11352 (\$12382.56),  
 OC(<50):\$11988 (\$13076.28),  
 PC(≥80):\$20484 (\$22343.52),  
 PC(50-80):\$12624 (\$13770),  
 PC(<50):\$6864 (\$7487.16)

Type of Costs: adjusted and unadjusted  
Classification: disease state specific  
Currency Year: USD, 2010

Quality: medium  
Classification: cost description

Cost of Nonadherence\*:  
 Adjusted:  
 THC(≥80):\$40212 (\$43862.52),  
 THC(50-80):\$40512 (\$44189.76),  
 THC(<50):\$40128 (\$43770.84),

Zhao et al[45]  
 2013  
 US

To examine the association between teriparatide (TPTD) adherence and healthcare utilisation and costs in real world US kyphoplasty/vertebroplasty

Design: Retrospective observational cohort study  
Follow Up: 36 months  
Sample Size: 1568 (≥80: 783, 50-80%: 382, <50%: 403)

Measure: PDC  
Classification: (≥80% = high, 50-80% = medium, <50% = low)  
Method of Assessment: pharmacy claims

Total healthcare costs  
 Inpatient costs  
 Outpatient costs  
 Pharmacy costs

1  
2  
3  
4  
5  
6  
7  
8  
9  
10  
11  
12  
13  
14  
15  
16  
17  
18  
19  
20  
21  
22  
23  
24  
25  
26  
27  
28  
29  
30  
31  
32  
33  
34  
35  
36  
37  
38  
39  
40  
41  
42  
43  
44  
45  
46  
47  
48  
49

lasty (KV) patients.

data

IC(≥80):\$8136 (\$8874.60),  
IC(50-80):\$12060 (\$13154.76),  
IC(<50):\$15444 (\$43404.36),  
OC(≥80):\$12924 (\$14097.24),  
OC(50-80):\$14928 (\$16283.16),  
OC(<50):\$17568 (\$19162.80),  
PC(≥80):\$19392 (\$21152.40),  
PC(50-80):\$13908 (\$15170.52),  
PC(<50):\$8700 (\$9843.24)  
Unadjusted:  
THC(≥80):\$42768 (\$46650.48),  
THC(50-80):\$36780 (\$40118.88),  
THC(<50):\$39792 (\$43404.36),  
IC(≥80):\$7620 (\$8311.80),  
IC(50-80):\$12228 (\$13338.12),  
IC(<50):\$15768 (\$17199.48),  
OC(≥80):\$14580 (\$15903.60),  
OC(50-80):\$12108 (\$13207.20),  
OC(<50):\$15324 (\$16715.16),  
PC(≥80):\$20568 (\$22435.20),  
PC(50-80):\$12444 (\$13573.68),  
PC(<50):\$8700 (\$9489.84)

For peer review only

**Respiratory Disease**

*Delea et al*[46]  
2008  
US

To assess the association between adherence with fluticasone propionate/salmeterol combination product in a single inhaler and asthma care utilisation and costs in asthma

Design: Retrospective longitudinal cohort study  
Follow Up: 24 months  
Sample Size: 12907 (≥75: 2612, 50-75%: 3608, 25-50%: 5035, <25%: 1652)

Measure: MPR  
Classification: (≥75, 50-75%, 25-50%, <25%)  
Method of Assessment: pharmacy claims data

Total costs  
Outpatient costs  
ED costs  
Other costs

Type of Costs: unadjusted  
Classification: disease state specific  
Currency Year: USD, 2003  
Cost of Nonadherence\*:  
TC(≥75):\$1564 (\$1990.27),  
TC(50-75):\$1128 (\$1435.44),  
TC(25-50):\$900 (\$1145.30),  
TC(<25):\$632 (\$804.25),  
OC(≥75):\$1272 (\$1618.69),

Quality: medium  
Classification: cost description

patients in typical US clinical practice

OC(50-75):\$852 (\$1084.21),  
 OC(25-50):\$600 (\$763.53),  
 OC(<25):\$388 (\$493.75),  
 EDC(≥75):\$32 (\$40.72),  
 EDC(50-75):\$36 (\$45.81),  
 EDC(25-50):\$60 (\$76.35),  
 EDC(<25):\$48 (\$61.08),  
 OtC(≥75):\$292 (\$371.59),  
 OtC(50-75):\$276 (\$351.22),  
 OtC(25-50):\$300 (\$381.77),  
 OtC(<25):\$240 (\$305.41)

17 *Diehl et al*[47]  
 18 2010  
 19 US

To evaluate respiratory-related medical outcomes and cost for infants who were prescribed and received palivizumab in accordance with the dosing schedule recommended by the American Academy of Paediatrics in 2006 versus those who did not.

Design: Retrospective claims analysis  
Follow Up: 7 months  
Sample Size: 245 (A:73, NA:172)

Measure: 37 day gap in claims  
Classification: (>37 day gap in claims = noncompliant)  
Method of Assessment: pharmacy claims data

Total costs  
 Pharmacy costs  
 Services costs

Type of Costs: unadjusted  
Classification: disease state specific  
Currency Year: USD, 2007  
Cost of Nonadherence:  
 TC:\$19093.46 (\$21656.12),  
 PC:\$7647.40 (\$8673.81),  
 SC\*\*:\$11604.03 (\$13161.45)

Quality: medium  
Classification: cost description

31 *Joshi et al*[48]  
 32 2006  
 33 US

Examine the association of medication adherence with workplace productivity and health related quality of life in asthma patients.

Design: quantitative analysis  
Follow Up:  
Sample Size: 385 (high:150, medium:73, low: 162)

Measure: Morisky scale  
Classification: (0= high adherence, 1-2 = medium adherence, >2 = low adherence)  
Method of Assessment:

Total productivity cost  
 Absenteeism costs  
 Presenteeism costs

Type of Costs: unadjusted  
Classification: disease state specific  
Currency Year: USD, 2002  
Cost of Nonadherence<sup>##</sup>:  
 TPC(0):\$1210.90 (\$1571.73),  
 TPC(1-2):\$1428.50 (\$1854.17),  
 TPC(>2):\$1073.10 (\$1392.87),  
 AbC(0):\$633.70 (\$822.53),  
 AbC(1-2):\$608.90 (\$790.34),

Quality: medium  
Classification: cost outcome description

|    |                           |                        |                               |                         |                                |                                     |
|----|---------------------------|------------------------|-------------------------------|-------------------------|--------------------------------|-------------------------------------|
| 1  |                           |                        |                               |                         |                                |                                     |
| 2  |                           |                        |                               |                         |                                |                                     |
| 3  |                           |                        |                               |                         |                                |                                     |
| 4  |                           |                        |                               |                         |                                |                                     |
| 5  |                           |                        |                               |                         |                                |                                     |
| 6  |                           |                        | questionnaire                 |                         | AbC(>2):\$474.80 (\$616.28),   |                                     |
| 7  |                           |                        |                               |                         | PrC(0):\$577.20 (\$749.20),    |                                     |
| 8  |                           |                        |                               |                         | PrC(1-2):\$819.60 (\$1063.83), |                                     |
| 9  |                           |                        |                               |                         | PrC(>2):\$598.30 (\$776.59)    |                                     |
| 10 | <i>Miravittles et</i>     | To analyse the         | <u>Design:</u> multicentre,   | <u>Measure:</u> GOLD    | ED costs                       | <u>Quality:</u> medium              |
| 11 | <i>al[49]</i>             | economic impact of     | retrospective,                | 2007 Guidelines         | Pharmacy                       | <u>Classification:</u> cost         |
| 12 | 2013                      | non-adherence to the   | observational study           | <u>Classification:</u>  | costs                          | <u>Classification:</u> cost         |
| 13 | Spain                     | global initiative for  | <u>Follow Up:</u> 18 months   | (adherent,              | Physician                      | <u>Cost of Nonadherence:</u>        |
| 14 |                           | obstructive lung       | <u>Sample Size:</u> 1365      | nonadherent)            | office visit                   | EDC:€40.83 (\$57.91),               |
| 15 |                           | disease (GOLD)         | (A:246, NA:1119)              | <u>Method of</u>        | costs                          | PC:€771.50 (\$1094.27),             |
| 16 |                           | guidelines in patients |                               | <u>Assessment:</u> GOLD | Hospitalization                | POC:€106.29 (\$150.76),             |
| 17 |                           | with chronic           |                               | guidelines              | costs                          | HC:€101.61 (\$144.12)               |
| 18 |                           | obstructive pulmonary  |                               |                         | Primary care                   | PCC:€123.84 (\$175.65),             |
| 19 |                           | disease (COPD).        |                               |                         | costs                          | IntC:€321.44 (\$455.92),            |
| 20 |                           |                        |                               |                         | Interdisciplinary              | MTC:€36.66 (\$51.99),               |
| 21 |                           |                        |                               |                         | y visit costs                  | RC:€24.24 (\$34.38),                |
| 22 |                           |                        |                               |                         | Medical test                   | LC:€17.35 (\$24.61)                 |
| 23 |                           |                        |                               |                         | costs                          |                                     |
| 24 |                           |                        |                               |                         | Radiology                      |                                     |
| 25 |                           |                        |                               |                         | costs                          |                                     |
| 26 |                           |                        |                               |                         | Laboratory                     |                                     |
| 27 |                           |                        |                               |                         | costs                          |                                     |
| 28 |                           |                        |                               |                         |                                |                                     |
| 29 |                           |                        |                               |                         |                                |                                     |
| 30 | <i>Quittner et al[50]</i> | To evaluate            | <u>Design:</u> retrospective, | <u>Measure:</u> MPR     | Total                          | <u>Quality:</u> medium              |
| 31 | 2014                      | associations of        | cohort study                  | <u>Classification:</u>  | healthcare                     | <u>Classification:</u> cost         |
| 32 | US                        | adherence to           | <u>Follow Up:</u> 2 years     | (≥80% = high            | costs                          | <u>Classification:</u> cost         |
| 33 |                           | pulmonary              | <u>Sample Size:</u> 3287      | adherence, 50-          |                                | <u>Cost of Nonadherence*:</u>       |
| 34 |                           | medications, age,      | (≥80%: 663, 50-80%:           | 80% = moderate          |                                | All cause:                          |
| 35 |                           | healthcare use and     | 949, <50%: 1675)              | adherence, <50%         |                                | THC(≥80):\$35749.50 (\$38244.05),   |
| 36 |                           | cost among cystic      |                               | = low adherence)        |                                | THC(50-80):\$45031.50 (\$48173.73), |
| 37 |                           | fibrosis patients.     |                               | <u>Method of</u>        |                                | THC(<50):\$50284.50 (\$53793.28)    |
| 38 |                           |                        |                               | <u>Assessment:</u>      |                                | Disease state specific:             |
| 39 |                           |                        |                               | pharmacy claims         |                                |                                     |
| 40 |                           |                        |                               |                         |                                |                                     |
| 41 |                           |                        |                               |                         |                                |                                     |
| 42 |                           |                        |                               |                         |                                |                                     |
| 43 |                           |                        |                               |                         |                                |                                     |
| 44 |                           |                        |                               |                         |                                |                                     |
| 45 |                           |                        |                               |                         |                                |                                     |
| 46 |                           |                        |                               |                         |                                |                                     |
| 47 |                           |                        |                               |                         |                                |                                     |
| 48 |                           |                        |                               |                         |                                |                                     |
| 49 |                           |                        |                               |                         |                                |                                     |

|    |                                 |                                                                                                                                                                                                                             |                                                                                                                                              |                                                                                                                                                                                            |                                                                                                        |                                                                                                                                                                                                                                                                       |                                                                           |
|----|---------------------------------|-----------------------------------------------------------------------------------------------------------------------------------------------------------------------------------------------------------------------------|----------------------------------------------------------------------------------------------------------------------------------------------|--------------------------------------------------------------------------------------------------------------------------------------------------------------------------------------------|--------------------------------------------------------------------------------------------------------|-----------------------------------------------------------------------------------------------------------------------------------------------------------------------------------------------------------------------------------------------------------------------|---------------------------------------------------------------------------|
|    |                                 |                                                                                                                                                                                                                             | data                                                                                                                                         |                                                                                                                                                                                            | THC(≥80):\$23764 (\$25422.22),<br>THC(50-80):\$33132.50 (\$35444.44),<br>THC(<50):\$33894 (\$36259.07) |                                                                                                                                                                                                                                                                       |                                                                           |
|    | <b>Gastrointestinal Disease</b> |                                                                                                                                                                                                                             |                                                                                                                                              |                                                                                                                                                                                            |                                                                                                        |                                                                                                                                                                                                                                                                       |                                                                           |
| 11 | <i>Carter et al</i> [51]        | To further evaluate the impact of adherence to infliximab on CD related utilisation and inpatient costs in the first year of treatment using a different definition of adherence and a larger more diverse claims database. | <u>Design:</u> retrospective, observational cohort claims analysis<br><u>Follow Up:</u> 12 months<br><u>Sample Size:</u> 638 (A:466, NA:172) | <u>Measure:</u> number of infusions in 12 month period<br><u>Classification:</u> (7-9 infusions = adherent, <7 infusions = nonadherent)<br><u>Method of Assessment:</u> health claims data | Hospitalization costs                                                                                  | <u>Type of Costs:</u> unadjusted<br><u>Classification:</u> disease state specific<br><u>Currency Year:</u> USD, 2007<br><u>Cost of Nonadherence:</u> HC:\$37783 (\$42854.12)                                                                                          | <u>Quality:</u> medium<br><u>Classification:</u> cost outcome description |
| 12 | 2011                            |                                                                                                                                                                                                                             |                                                                                                                                              |                                                                                                                                                                                            |                                                                                                        |                                                                                                                                                                                                                                                                       |                                                                           |
| 13 | US                              |                                                                                                                                                                                                                             |                                                                                                                                              |                                                                                                                                                                                            |                                                                                                        |                                                                                                                                                                                                                                                                       |                                                                           |
| 23 | <i>Gosselin et al</i> [52]      | To examine the effects of gastroesophageal reflux disease (GERD) patients compliance with PPI therapy on health care resource utilisation and costs.                                                                        | <u>Design:</u> retrospective cohort study<br><u>Follow Up:</u><br><u>Sample Size:</u> 41837 (A:28321, NA:13516)                              | <u>Measure:</u> MPR<br><u>Classification:</u> (≥80% = adherent, <80% = nonadherent)<br><u>Method of Assessment:</u> pharmacy claims data                                                   | Total costs<br>Inpatient costs<br>Outpatient costs<br>Pharmacy costs<br>Medical costs                  | <u>Type of Costs:</u> adjusted<br><u>Classification:</u> disease state specific<br><u>Currency Year:</u> USD, 2003<br><u>Cost of Nonadherence:</u> TC:\$9497 (\$12085.43), IC:\$2116 (\$2692.72), OC:\$5458 (\$6945.59), PC:\$1922 (\$2445.85), MC:\$7575 (\$9639.58) | <u>Quality:</u> medium<br><u>Classification:</u> cost description         |
| 24 | 2009                            |                                                                                                                                                                                                                             |                                                                                                                                              |                                                                                                                                                                                            |                                                                                                        |                                                                                                                                                                                                                                                                       |                                                                           |
| 25 | US                              |                                                                                                                                                                                                                             |                                                                                                                                              |                                                                                                                                                                                            |                                                                                                        |                                                                                                                                                                                                                                                                       |                                                                           |
| 34 | <i>Kane et al</i> [53]          | To evaluate adherence to infliximab maintenance therapy and the impact of medication adherence on healthcare utilisation and costs by                                                                                       | <u>Design:</u> retrospective cohort analysis<br><u>Follow Up:</u> 12 months<br><u>Sample Size:</u> 571 (A:375, NA:196)                       | <u>Measure:</u> number of infusions in 12 month period<br><u>Classification:</u> (≥8 infusions = adherent, <7 infusions =                                                                  | Outpatient costs<br>ED costs<br>Pharmacy costs<br>Medical costs<br>Hospitalization                     | <u>Type of Costs:</u> unadjusted<br><u>Classification:</u> all cause and disease state specific<br><u>Currency Year:</u> USD, 2004<br><u>Cost of Nonadherence:</u> All cause: OC:\$6679 (\$8272.62),                                                                  | <u>Quality:</u> medium<br><u>Classification:</u> cost outcome description |
| 35 | 2009                            |                                                                                                                                                                                                                             |                                                                                                                                              |                                                                                                                                                                                            |                                                                                                        |                                                                                                                                                                                                                                                                       |                                                                           |
| 36 | US                              |                                                                                                                                                                                                                             |                                                                                                                                              |                                                                                                                                                                                            |                                                                                                        |                                                                                                                                                                                                                                                                       |                                                                           |



1  
2  
3  
4  
5  
6  
7  
8  
9  
10  
11  
12  
13  
14  
15  
16  
17  
18  
19  
20  
21  
22  
23  
24  
25  
26  
27  
28  
29  
30  
31  
32  
33  
34  
35  
36  
37  
38  
39  
40  
41  
42  
43  
44  
45  
46  
47  
48  
49

|                 |                                                                                                                                                                                |                                                                                                                                      |                                                                                                         |                                                                                                            |                                                                                                                                                                                                                                                                                                                                                                                           |                                                                 |
|-----------------|--------------------------------------------------------------------------------------------------------------------------------------------------------------------------------|--------------------------------------------------------------------------------------------------------------------------------------|---------------------------------------------------------------------------------------------------------|------------------------------------------------------------------------------------------------------------|-------------------------------------------------------------------------------------------------------------------------------------------------------------------------------------------------------------------------------------------------------------------------------------------------------------------------------------------------------------------------------------------|-----------------------------------------------------------------|
|                 | patients.                                                                                                                                                                      |                                                                                                                                      | nonadherent)                                                                                            | costs                                                                                                      | EDC:\$314 (\$388.92),<br>MC:\$16129 (\$19977.40),<br>HC:\$6893 (\$8537.68)<br>Disease state specific:<br>OC:\$3931 (\$4868.94),<br>EDC:\$91 (\$112.71),<br>PC:\$18751 (\$23225.01),<br>MC:\$10243 (\$12686.99),<br>HC:\$4494 (\$5566.27)                                                                                                                                                  |                                                                 |
|                 |                                                                                                                                                                                |                                                                                                                                      | <u>Method of</u>                                                                                        |                                                                                                            |                                                                                                                                                                                                                                                                                                                                                                                           |                                                                 |
|                 |                                                                                                                                                                                |                                                                                                                                      | <u>Assessment:</u>                                                                                      |                                                                                                            |                                                                                                                                                                                                                                                                                                                                                                                           |                                                                 |
|                 |                                                                                                                                                                                |                                                                                                                                      | health claims data                                                                                      |                                                                                                            |                                                                                                                                                                                                                                                                                                                                                                                           |                                                                 |
| Mitra et al[54] | To assess the association between adherence to oral 5-aminosalicylates (5-ASAs) and all cause costs and health care utilisation among patients with active ulcerative colitis. | <u>Design:</u> retrospective, observational cohort study<br><u>Follow Up:</u> 12 months<br><u>Sample Size:</u> 1693 (A:476, NA:1216) | <u>Measure:</u> MPR<br><u>Classification:</u> (≥80% = adherent, <80% = nonadherent)<br><u>Method of</u> | Inpatient costs<br>Outpatient costs<br>ED costs<br>Pharmacy costs<br>Ancillary costs<br>Non-pharmacy costs | <u>Type of Costs:</u> adjusted<br><u>Classification:</u> all cause and disease state specific<br><u>Currency Year:</u> USD, 2010<br><u>Cost of Nonadherence:</u><br>All cause:<br>PC:\$1541.60 (\$1681.55)<br>Disease state specific:<br>IC:\$28726.65 (\$31334.47),<br>OC:\$1145.67 (\$1249.67),<br>EDC:\$635.95 (\$693.68),<br>AC:\$4923.29 (\$5370.23),<br>NPC:\$14226.32 (\$15517.79) | <u>Quality:</u> high<br><u>Classification:</u> cost description |
| Wan et al[55]   | To examine the effect of adherence versus non-adherence on healthcare costs in patients with inflammatory bowel disease.                                                       | <u>Design:</u> retrospective cohort analysis<br><u>Follow Up:</u> 360 days<br><u>Sample Size:</u> 1646 (A:674, NA:972)               | <u>Measure:</u> MPR<br><u>Classification:</u> (≥80% = adherent, <80% = nonadherent)<br><u>Method of</u> | Total costs<br>Total healthcare costs<br>Inpatient costs<br>Outpatient costs<br>ED costs<br>Pharmacy costs | <u>Type of Costs:</u> adjusted<br><u>Classification:</u> all cause and disease state specific<br><u>Currency Year:</u> USD, 2009<br><u>Cost of Nonadherence:</u><br>All cause:<br>TC:\$47411 (\$52341.27),<br>THC:\$32522 (\$35903.96),<br>IC:\$17634 (\$19467.76),<br>OC:\$10909 (\$12043.43),<br>EDC:\$458 (\$505.63),                                                                  | <u>Quality:</u> high<br><u>Classification:</u> cost description |
|                 |                                                                                                                                                                                |                                                                                                                                      | <u>Assessment:</u>                                                                                      |                                                                                                            |                                                                                                                                                                                                                                                                                                                                                                                           |                                                                 |
|                 |                                                                                                                                                                                |                                                                                                                                      | pharmacy claims data                                                                                    |                                                                                                            |                                                                                                                                                                                                                                                                                                                                                                                           |                                                                 |

1  
2  
3  
4  
5  
6  
7  
8  
9  
10  
11  
12  
13  
14  
15  
16  
17  
18  
19  
20  
21  
22  
23  
24  
25  
26  
27  
28  
29  
30  
31  
32  
33  
34  
35  
36  
37  
38  
39  
40  
41  
42  
43  
44  
45  
46  
47  
48  
49

|                            |                                                                                                                                                                                                                                                             |                                                                                                                            |                                                                                                                                          |                                                                                                                                         |                                                                                                                                                                                                                                                                                                                                              |                                                                           |
|----------------------------|-------------------------------------------------------------------------------------------------------------------------------------------------------------------------------------------------------------------------------------------------------------|----------------------------------------------------------------------------------------------------------------------------|------------------------------------------------------------------------------------------------------------------------------------------|-----------------------------------------------------------------------------------------------------------------------------------------|----------------------------------------------------------------------------------------------------------------------------------------------------------------------------------------------------------------------------------------------------------------------------------------------------------------------------------------------|---------------------------------------------------------------------------|
|                            |                                                                                                                                                                                                                                                             |                                                                                                                            |                                                                                                                                          |                                                                                                                                         | PC:\$18410 (\$20324.46)<br>Disease state specific:<br>TC:\$33652 (\$37151.47),<br>THC:\$18764 (\$20715.27),<br>IC:\$12564 (\$13870.53),<br>OC:\$5890 (\$6502.50),<br>EDC:\$48 (\$52.99),<br>PC:\$15150 (\$16725.45)                                                                                                                          |                                                                           |
| <b>Epilepsy</b>            |                                                                                                                                                                                                                                                             |                                                                                                                            |                                                                                                                                          |                                                                                                                                         |                                                                                                                                                                                                                                                                                                                                              |                                                                           |
| <i>Davis et al</i> [56]    | To assess the extent of refill non-adherence with antiepileptic drugs (AEDs) and the potential association between AED non-adherence and healthcare costs in an adult managed care population.                                                              | <u>Design:</u> retrospective claims analysis<br><u>Follow Up:</u> 12 months<br><u>Sample Size:</u> 10892 (A:6644, NA:4248) | <u>Measure:</u> MPR<br><u>Classification:</u> (≥80% = adherent, <80% = nonadherent)<br><u>Method of Assessment:</u> pharmacy claims data | Total costs<br>Inpatient costs<br>ED costs<br>Pharmacy costs<br>Other pharmacy costs                                                    | <u>Type of Costs:</u> unadjusted<br><u>Classification:</u> disease state specific<br><u>Currency Year:</u> USD, 2003<br><u>Cost of Nonadherence</u> <sup>###</sup> :<br>TC:\$1466 (\$1865.56),<br>IC:\$1799 (\$2289.32),<br>EDC:\$260 (\$330.86),<br>PC:-\$71 (-\$90.35),<br>OtPC:-\$358 (-\$455.57)                                         | <u>Quality:</u> medium<br><u>Classification:</u> cost description         |
| <i>Ettinger et al</i> [57] | To assess the extent to which elderly patients diagnosed with epilepsy are non-adherent to antiepileptic drugs (AEDs) and the potential association between AED non-adherence and seizure recurrence, resource utilisation and annual direct medical costs. | <u>Design:</u> retrospective claims analysis<br><u>Follow Up:</u> 12 months<br><u>Sample Size:</u> 1278 (A:758, NA:520)    | <u>Measure:</u> MPR<br><u>Classification:</u> (≥80% = adherent, <80% = nonadherent)<br><u>Method of Assessment:</u> pharmacy claims data | Total costs<br>Inpatient costs<br>ED costs<br>Pharmacy costs<br>Physician Office visit costs<br>Ancillary costs<br>Other pharmacy costs | <u>Type of Costs:</u> unadjusted<br><u>Classification:</u> disease state specific<br><u>Currency Year:</u> USD, 2003<br><u>Cost of Nonadherence:</u><br>TC:\$17817 (\$22673.06),<br>IC:\$2714 (\$3453.71),<br>EDC:\$526 (\$669.36),<br>PC:\$347 (\$441.58),<br>POC:\$3063 (\$3897.83),<br>AC:\$8344 (\$10618.18),<br>OtPC:\$2822 (\$3591.14) | <u>Quality:</u> medium<br><u>Classification:</u> cost outcome description |
| <i>Faught et al</i> [58]   | To study the impact of                                                                                                                                                                                                                                      | <u>Design:</u> retrospective                                                                                               | <u>Measure:</u> MPR                                                                                                                      | Total costs                                                                                                                             | <u>Type of Costs:</u> unadjusted                                                                                                                                                                                                                                                                                                             | <u>Quality:</u> medium                                                    |

|    |                           |                        |                              |                        |                 |                                                |
|----|---------------------------|------------------------|------------------------------|------------------------|-----------------|------------------------------------------------|
| 1  |                           |                        |                              |                        |                 |                                                |
| 2  |                           |                        |                              |                        |                 |                                                |
| 3  |                           |                        |                              |                        |                 |                                                |
| 4  |                           |                        |                              |                        |                 |                                                |
| 5  | 2009                      | non-adherence to       | observational open           | <u>Classification:</u> | Inpatient costs | <u>Classification:</u> disease state specific  |
| 6  | US                        | antiepileptic drugs    | cohort design                | (≥80% = adherent,      | Outpatient      | <u>Currency Year:</u> USD, 2002                |
| 7  |                           | (AEDs) on healthcare   | <u>Follow Up:</u> 4.65 years | <80% =                 | costs           | <u>Cost of Nonadherence</u> *:                 |
| 8  |                           | utilisation and direct | <u>Sample Size:</u> 33658    | nonadherent)           | ED costs        | TC:\$14417.64 (\$18713.91),                    |
| 9  |                           | medical costs in a     | (A:24907, NA:8751)           | <u>Method of</u>       | Pharmacy        | IC:\$6682.28 (\$6873.51),                      |
| 10 |                           | Medicaid population.   |                              | <u>Assessment:</u>     | costs           | OC:\$2172.40 (\$2819.75),                      |
| 11 |                           |                        |                              | pharmacy claims        | Other           | EDC:\$405.96 (\$526.93),                       |
| 12 |                           |                        |                              | data                   | pharmacy        | PC:\$822.40 (\$1067.46),                       |
| 13 |                           |                        |                              |                        | costs           | OtPC:\$4334.60 (\$5626.26)                     |
| 14 |                           |                        |                              |                        |                 |                                                |
| 15 | <b>HIV/AIDS</b>           |                        |                              |                        |                 |                                                |
| 16 | <i>Barnett et al</i> [59] | To characterise the    | <u>Design:</u> retrospective | <u>Measure:</u>        | Total costs     | <u>Type of Costs:</u> unadjusted               |
| 17 | 2011                      | cost of HIV care       | observational cohort         | antiretroviral         |                 | <u>Classification:</u> disease state specific; |
| 18 | US                        | including combination  | study                        | taking behaviour       |                 | viral load count                               |
| 19 |                           | antiretroviral         | <u>Follow Up:</u> 1 year     | <u>Classification:</u> |                 | <u>Currency Year:</u> USD, 2006                |
| 20 |                           | treatment.             | <u>Sample Size:</u> 1896     | (85% adherence         |                 | <u>Cost of Nonadherence</u> **:                |
| 21 |                           |                        | (not specified)              | with 3                 |                 | High viral load:                               |
| 22 |                           |                        |                              | antiretroviral         |                 | TC:\$25824 (\$30067.54)                        |
| 23 |                           |                        |                              | therapy regimen =      |                 | Low viral load:                                |
| 24 |                           |                        |                              | adherent, all other    |                 | TC:\$20509.67 (\$23879.92)                     |
| 25 |                           |                        |                              | use =                  |                 |                                                |
| 26 |                           |                        |                              | nonadherent)           |                 |                                                |
| 27 |                           |                        |                              | <u>Method of</u>       |                 |                                                |
| 28 |                           |                        |                              | <u>Assessment:</u>     |                 |                                                |
| 29 |                           |                        |                              | pharmacy claims        |                 |                                                |
| 30 |                           |                        |                              | data                   |                 |                                                |
| 31 |                           |                        |                              |                        |                 |                                                |
| 32 | <i>Cooke et al</i> [60]   | To measure adherence   | <u>Design:</u> retrospective | <u>Measure:</u> MPR    | Total           | <u>Type of Costs:</u> unadjusted               |
| 33 | 2014                      | to antiretroviral      | claims analysis              | <u>Classification:</u> | healthcare      | <u>Classification:</u> disease state specific  |
| 34 | US                        | therapy regimens in    | <u>Follow Up:</u> 1 year     | (≥90% = adherent,      | costs           | <u>Currency Year:</u> USD, 2011                |
| 35 |                           | commercially insured   | <u>Sample Size:</u> 3528     | <90% =                 | Inpatient costs | <u>Cost of Nonadherence:</u>                   |
| 36 |                           | patients with HIV      | (A:1737, NA:640)             | nonadherent)           | Outpatient      | THC:\$18868 (\$20184.58),                      |
| 37 |                           | infection and analyse  |                              | <u>Method of</u>       | costs           | IC:\$2700 (\$2888.40),                         |
| 38 |                           | the clinical and       |                              | <u>Assessment:</u>     | Pharmacy        | OC:\$915 (\$978.85),                           |
| 39 |                           | demographic factors    |                              | pharmacy claims        | costs           | PC:\$15253 (\$16317.33)                        |
| 40 |                           |                        |                              |                        |                 |                                                |
| 41 |                           |                        |                              |                        |                 |                                                |
| 42 |                           |                        |                              |                        |                 |                                                |
| 43 |                           |                        |                              |                        |                 |                                                |
| 44 |                           |                        |                              |                        |                 |                                                |
| 45 |                           |                        |                              |                        |                 |                                                |
| 46 |                           |                        |                              |                        |                 |                                                |
| 47 |                           |                        |                              |                        |                 |                                                |
| 48 |                           |                        |                              |                        |                 |                                                |
| 49 |                           |                        |                              |                        |                 |                                                |

|    |                          |                             |                                |                           |                 |                                               |
|----|--------------------------|-----------------------------|--------------------------------|---------------------------|-----------------|-----------------------------------------------|
| 1  |                          |                             |                                |                           |                 |                                               |
| 2  |                          |                             |                                |                           |                 |                                               |
| 3  |                          |                             |                                |                           |                 |                                               |
| 4  |                          |                             |                                |                           |                 |                                               |
| 5  |                          | associated with $\geq 90\%$ |                                | data                      |                 |                                               |
| 6  |                          | adherence.                  |                                |                           |                 |                                               |
| 7  |                          |                             |                                |                           |                 |                                               |
| 8  | <i>Pruitt et al</i> [61] | To examine Medicaid         | <u>Design:</u> retrospective   | <u>Measure:</u> MPR       | Total costs     | <u>Type of Costs:</u> unadjusted              |
| 9  | 2015                     | insured HIV positive        | cohort study                   | <u>Classification:</u>    | Inpatient costs | <u>Classification:</u> disease state specific |
| 10 | US                       | and AIDS diagnosed          | <u>Follow Up:</u> 2 years      | ( $\geq 90\%$ = adherent, | Outpatient      | <u>Currency Year:</u> USD, 2009               |
| 11 |                          | patient groups              | <u>Sample Size:</u> 502 (A:56, | <90% =                    | costs           | <u>Cost of Nonadherence</u> * :               |
| 12 |                          | separately to               | NA:176)                        | nonadherent)              | Pharmacy        | HIV:                                          |
| 13 |                          | determine association       |                                | <u>Method of</u>          | costs           | TC:\$15360 (\$16957.32),                      |
| 14 |                          | of ART adherence to         |                                | <u>Assessment:</u>        | Other           | IC:\$3864 (\$4265.76),                        |
| 15 |                          | mean monthly total          |                                | pharmacy claims           | pharmacy        | OC:\$3948 (\$4358.52),                        |
| 16 |                          | healthcare                  |                                | data                      | costs           | PC:\$4956 (\$5471.40),                        |
| 17 |                          | expenditures in the 24      |                                |                           | Behavioural     | OtPC:\$1764 (\$1947.48),                      |
| 18 |                          | month measurement           |                                |                           | health          | BHIC:\$840 (\$927.36)                         |
| 19 |                          | period.                     |                                |                           | inpatient costs | AIDS:                                         |
| 20 |                          |                             |                                |                           |                 | TC:\$27648 (\$30523.08),                      |
| 21 |                          |                             |                                |                           |                 | IC:\$13008 (\$14360.76),                      |
| 22 |                          |                             |                                |                           |                 | OC:\$5880 (\$6491.52),                        |
| 23 |                          |                             |                                |                           |                 | PC:\$5640 (\$6226.56),                        |
| 24 |                          |                             |                                |                           |                 | OtPC:\$2580 (\$2848.32),                      |
| 25 |                          |                             |                                |                           |                 | BHIC:\$528 (\$582.96)                         |
| 26 |                          |                             |                                |                           |                 |                                               |
| 27 | <b>Parkinson's</b>       |                             |                                |                           |                 |                                               |
| 28 | <b>Disease</b>           |                             |                                |                           |                 |                                               |
| 29 | <i>Davis et al</i> [62]  | To assess the extent to     | <u>Design:</u> retrospective   | <u>Measure:</u> MPR       | Total costs     | <u>Type of Costs:</u> unadjusted              |
| 30 | 2010                     | which patients              | administrative claims          | <u>Classification:</u>    | Pharmacy        | <u>Classification:</u> disease state specific |
| 31 | US                       | diagnosed with              | study                          | ( $\geq 80\%$ = adherent, | costs           | <u>Currency Year:</u> USD, 2001               |
| 32 |                          | Parkinson's disease are     | <u>Follow Up:</u> 12 months    | <80% =                    | Medical costs   | <u>Cost of Nonadherence:</u>                  |
| 33 |                          | non-adherent with           | <u>Sample Size:</u> 3119       | nonadherent)              |                 | TC:\$18511 (\$24262.36),                      |
| 34 |                          | antiparkinson therapy       | (A:1211, NA:1908)              | <u>Method of</u>          |                 | PC:\$2684 (\$3537.36),                        |
| 35 |                          | and the potential           |                                | <u>Assessment:</u>        |                 | MC:\$15827 (\$20859.12)                       |
| 36 |                          | association between         |                                | pharmacy claims           |                 |                                               |
| 37 |                          | non-adherence and all       |                                | data                      |                 |                                               |
| 38 |                          | cause medical costs.        |                                |                           |                 |                                               |
| 39 |                          |                             |                                |                           |                 |                                               |
| 40 | <i>Delea et al</i> [63]  | To assess the               | <u>Design:</u> retrospective   | <u>Measure:</u> PDC       | Total costs     | <u>Type of Costs:</u> adjusted and unadjusted |
| 41 |                          |                             |                                |                           |                 | <u>Quality:</u> high                          |
| 42 |                          |                             |                                |                           |                 |                                               |
| 43 |                          |                             |                                |                           |                 |                                               |
| 44 |                          |                             |                                |                           |                 |                                               |
| 45 |                          |                             |                                |                           |                 |                                               |
| 46 |                          |                             |                                |                           |                 |                                               |
| 47 |                          |                             |                                |                           |                 |                                               |
| 48 |                          |                             |                                |                           |                 |                                               |
| 49 |                          |                             |                                |                           |                 |                                               |

|    |                       |                        |                               |                        |                 |                                               |
|----|-----------------------|------------------------|-------------------------------|------------------------|-----------------|-----------------------------------------------|
| 1  |                       |                        |                               |                        |                 |                                               |
| 2  |                       |                        |                               |                        |                 |                                               |
| 3  |                       |                        |                               |                        |                 |                                               |
| 4  |                       |                        |                               |                        |                 |                                               |
| 5  | 2011                  | associations between   | historical cohort study       | <u>Classification:</u> | Inpatient costs | <u>Classification:</u> all cause and disease  |
| 6  | US                    | adherence to           | <u>Follow Up:</u> 12 months   | (≥80% =                | Pharmacy        | state specific                                |
| 7  |                       | levodopa/carbidopa/e   | <u>Sample Size:</u> 1215      | satisfactory, <80%     | costs           | <u>Currency Year:</u> USD, 2005               |
| 8  |                       | ntacapone therapy and  | (A:617, NA:598)               | = unsatisfactory)      | Other costs     | <u>Cost of Nonadherence:</u>                  |
| 9  |                       | healthcare utilisation |                               | <u>Method of</u>       |                 | Adjusted all cause:                           |
| 10 |                       | and costs.             |                               | <u>Assessment:</u>     |                 | TC:\$19686 (\$23625.30),                      |
| 11 |                       |                        |                               | pharmacy claims        |                 | IC:\$5954 (\$7145.43),                        |
| 12 |                       |                        |                               | data                   |                 | PC:\$6391 (\$7669.88),                        |
| 13 |                       |                        |                               |                        |                 | OC:\$8795 (\$10554.94)                        |
| 14 |                       |                        |                               |                        |                 | Adjusted disease state specific:              |
| 15 |                       |                        |                               |                        |                 | TC:\$8574 (\$10289.71),                       |
| 16 |                       |                        |                               |                        |                 | IC:\$3705 (\$4446.39),                        |
| 17 |                       |                        |                               |                        |                 | PC:\$3850 (\$4620.41),                        |
| 18 |                       |                        |                               |                        |                 | OC:\$1884 (\$2261)                            |
| 19 |                       |                        |                               |                        |                 | Unadjusted all cause:                         |
| 20 |                       |                        |                               |                        |                 | TC:\$19362 (\$23236.46),                      |
| 21 |                       |                        |                               |                        |                 | IC:\$5463 (\$6556.18),                        |
| 22 |                       |                        |                               |                        |                 | PC:\$6158 (\$7390.26),                        |
| 23 |                       |                        |                               |                        |                 | OC:\$7740 (\$9288.82)                         |
| 24 |                       |                        |                               |                        |                 | Unadjusted disease state specific:            |
| 25 |                       |                        |                               |                        |                 | TC:\$9156 (\$10988.18),                       |
| 26 |                       |                        |                               |                        |                 | IC:\$3238 (\$3885.94),                        |
| 27 |                       |                        |                               |                        |                 | PC:\$3789 (\$4547.20),                        |
| 28 |                       |                        |                               |                        |                 | OC:\$2129 (\$2555.03)                         |
| 29 |                       |                        |                               |                        |                 |                                               |
| 30 |                       |                        |                               |                        |                 |                                               |
| 31 | <i>Wei et al</i> [64] | To examine the         | <u>Design:</u> retrospective  | <u>Measure:</u> MPR    | Total costs     | <u>Type of Costs:</u> unadjusted              |
| 32 | 2014                  | associations of        | cross-sectional study         | <u>Classification:</u> | Inpatient costs | <u>Classification:</u> disease state specific |
| 33 | US                    | adherence to           | <u>Follow Up:</u> 19 months   | (>90<100% = high,      | Outpatient      | <u>Currency Year:</u> USD, 2007               |
| 34 |                       | antiparkinson drugs    | <u>Sample Size:</u> 7583 (90- | >80<89% =              | costs           | <u>Cost of Nonadherence:</u>                  |
| 35 |                       | with healthcare        | 100%:3948, 80-                | moderate, ≤79% =       | Pharmacy        | TC(90-100):\$36407 (\$41293.43),              |
| 36 |                       | utilisation and        | 89%:1456, ≤79%:2179)          | low)                   | costs           | TC(80-89):\$43417 (\$49244.29),               |
| 37 |                       | economic outcomes.     |                               | <u>Method of</u>       |                 | TC(≤79):\$45867 (\$52023.13),                 |
| 38 |                       |                        |                               | <u>Assessment:</u>     |                 | IC(90-100):\$15294 (\$17346.71),              |
| 39 |                       |                        |                               | pharmacy claims        |                 | IC(80-89):\$21603 (\$24502.49),               |
| 40 |                       |                        |                               |                        |                 |                                               |
| 41 |                       |                        |                               |                        |                 |                                               |
| 42 |                       |                        |                               |                        |                 |                                               |
| 43 |                       |                        |                               |                        |                 |                                               |
| 44 |                       |                        |                               |                        |                 |                                               |
| 45 |                       |                        |                               |                        |                 |                                               |
| 46 |                       |                        |                               |                        |                 |                                               |
| 47 |                       |                        |                               |                        |                 |                                               |
| 48 |                       |                        |                               |                        |                 |                                               |
| 49 |                       |                        |                               |                        |                 |                                               |

1  
2  
3  
4  
5  
6  
7  
8  
9  
10  
11  
12  
13  
14  
15  
16  
17  
18  
19  
20  
21  
22  
23  
24  
25  
26  
27  
28  
29  
30  
31  
32  
33  
34  
35  
36  
37  
38  
39  
40  
41  
42  
43  
44  
45  
46  
47  
48  
49

|                                         |                                                                                                                                                                                                   |                                                                                                                   |                                                                                                                                          |                                                                                                                                                                                |                                                                                                                                                                                                                                                                                                                                                                                                                                                                                                                                                                                                                                            |                                                                         |
|-----------------------------------------|---------------------------------------------------------------------------------------------------------------------------------------------------------------------------------------------------|-------------------------------------------------------------------------------------------------------------------|------------------------------------------------------------------------------------------------------------------------------------------|--------------------------------------------------------------------------------------------------------------------------------------------------------------------------------|--------------------------------------------------------------------------------------------------------------------------------------------------------------------------------------------------------------------------------------------------------------------------------------------------------------------------------------------------------------------------------------------------------------------------------------------------------------------------------------------------------------------------------------------------------------------------------------------------------------------------------------------|-------------------------------------------------------------------------|
|                                         |                                                                                                                                                                                                   |                                                                                                                   | data                                                                                                                                     |                                                                                                                                                                                | IC(≤79):\$24727 (\$28045.78),<br>OC(90-100):\$10155 (\$11517.97),<br>OC(80-89):\$11838 (\$13426.86),<br>OC(≤79):\$12889 (\$14618.92),<br>PC(90-100):\$10957 (\$12427.61),<br>PC(80-89):\$9976 (\$11314.95),<br>PC(≤79):\$8251 (\$9358.42)                                                                                                                                                                                                                                                                                                                                                                                                  |                                                                         |
| <b>Musculoskeletal</b>                  |                                                                                                                                                                                                   |                                                                                                                   |                                                                                                                                          |                                                                                                                                                                                |                                                                                                                                                                                                                                                                                                                                                                                                                                                                                                                                                                                                                                            |                                                                         |
| <i>Ivanova et al</i> [65]<br>2012<br>US | To compare the rates of severe relapse and total direct and indirect costs over a 2 year period between US based employees with MS who were adherent and non-adherent to disease modifying drugs. | <u>Design:</u> retrospective cohort study<br><u>Follow Up:</u> 2 years<br><u>Sample Size:</u> 648 (A:448, NA:200) | <u>Measure:</u> MPR<br><u>Classification:</u> (≥80% = adherent, <80% = nonadherent)<br><u>Method of Assessment:</u> pharmacy claims data | Total costs<br>Total healthcare costs<br>Inpatient costs<br>Outpatient costs<br>ED costs<br>Pharmacy costs<br>Medical costs<br>Short term disability costs<br>Absenteeism cost | <u>Type of Costs:</u> unadjusted<br><u>Classification:</u> all cause, disease state specific and indirect<br><u>Currency Year:</u> USD, 2007<br><u>Cost of Nonadherence</u> *:<br>All cause:<br>TC:\$8079 (\$9276.76),<br>THC:\$6022 (\$6830.25),<br>IC:\$1030.50 (\$1168.81),<br>OC:\$3231 (\$3664.65),<br>EDC:\$143.50 (\$162.76),<br>PC:\$1617 (\$1834.03),<br>MC:\$4405.50 (\$4996.79)<br>Disease state specific:<br>TC:\$3005 (\$3408.32),<br>IC:\$505 (\$572.78),<br>OC:\$1710 (\$1939.51),<br>EDC:\$37 (\$41.97),<br>PC:\$753 (\$854.07),<br>MC:\$2252 (\$2554.26)<br>Indirect:<br>STDC:\$1231 (\$1396.22),<br>AbC:\$826 (\$936.86) | <u>Quality:</u> high<br><u>Classification:</u> cost outcome description |
| <i>Tan et al</i> [66]<br>2011           | To assess the impact of treatment adherence                                                                                                                                                       | <u>Design:</u> retrospective cohort study                                                                         | <u>Measure:</u> MPR<br><u>Classification:</u>                                                                                            | Medical costs                                                                                                                                                                  | <u>Type of Costs:</u> adjusted and unadjusted<br><u>Classification:</u> disease state specific                                                                                                                                                                                                                                                                                                                                                                                                                                                                                                                                             | <u>Quality:</u> medium<br><u>Classification:</u> cost                   |

|    |                         |                          |                              |                        |                                               |                             |
|----|-------------------------|--------------------------|------------------------------|------------------------|-----------------------------------------------|-----------------------------|
| 1  |                         |                          |                              |                        |                                               |                             |
| 2  |                         |                          |                              |                        |                                               |                             |
| 3  |                         |                          |                              |                        |                                               |                             |
| 4  |                         |                          |                              |                        |                                               |                             |
| 5  | US                      | on MS related            | <u>Follow Up:</u> 12 months  | (≥80% = adherent,      | <u>Currency Year:</u> USD, 2007               | description                 |
| 6  |                         | hospitalizations         | <u>Sample Size:</u> 2446     | <80% =                 | <u>Cost of Nonadherence:</u>                  |                             |
| 7  |                         | (inpatient), ER visits,  | (A:1459, NA:987)             | nonadherent)           | Adjusted:                                     |                             |
| 8  |                         | MS relapses and          |                              | <u>Method of</u>       | MC:\$4348 (\$5062.49)                         |                             |
| 9  |                         | medical costs.           |                              | <u>Assessment:</u>     | Unadjusted:                                   |                             |
| 10 |                         |                          |                              | pharmacy claims        | MC:\$5179 (\$6030.04)                         |                             |
| 11 |                         |                          |                              | data                   |                                               |                             |
| 12 |                         |                          |                              |                        |                                               |                             |
| 13 | <i>Zhao et al[67]</i>   | To examine predictors    | <u>Design:</u> retrospective | <u>Measure:</u> MPR    | <u>Type of Costs:</u> adjusted                | <u>Quality:</u> medium      |
| 14 | 2011                    | associated with          | cohort analysis              | <u>Classification:</u> | <u>Classification:</u> disease state specific | <u>Classification:</u> cost |
| 15 | US                      | duloxetine adherence     | <u>Follow Up:</u> 12 months  | (≥80% = adherent,      | <u>Currency Year:</u> USD, 2008               | analysis                    |
| 16 |                         | and its association with | <u>Sample Size:</u> 5435     | <80% =                 | <u>Cost of Nonadherence:</u> commercial:      |                             |
| 17 |                         | healthcare costs         | (A:1744, NA:3691)            | nonadherent)           | TC:\$20323 (\$22609.12),                      |                             |
| 18 |                         | among fibromyalgia       |                              | <u>Method of</u>       | IC:\$4808 (\$5348.85),                        |                             |
| 19 |                         | patients.                |                              | <u>Assessment:</u>     | OC:\$9822 (\$10926.87),                       |                             |
| 20 |                         |                          |                              | pharmacy claims        | PC:\$5693 (\$6333.40)                         |                             |
| 21 |                         |                          |                              | data                   | <u>Medicare:</u>                              |                             |
| 22 |                         |                          |                              |                        | TC:\$25282 (\$28125.96),                      |                             |
| 23 |                         |                          |                              |                        | IC:\$8604 (\$9571.86),                        |                             |
| 24 |                         |                          |                              |                        | OC:\$10068 (\$11200.54),                      |                             |
| 25 |                         |                          |                              |                        | PC:\$6611 (\$7354.67)                         |                             |
| 26 |                         |                          |                              |                        |                                               |                             |
| 27 | <b>Cancer</b>           |                          |                              |                        |                                               |                             |
| 28 | <i>Darkow et al[68]</i> | Estimate the             | <u>Design:</u> retrospective | <u>Measure:</u> MPR    | <u>Type of Costs:</u> unadjusted              | <u>Quality:</u> high        |
| 29 | 2007                    | association between      | observational cohort         | <u>Classification:</u> | <u>Classification:</u> disease state specific | <u>Classification:</u> cost |
| 30 | US                      | treatment                | analysis                     | (≥95% = very high,     | <u>Currency Year:</u> USD, 2004               | description                 |
| 31 |                         | interruptions and non-   | <u>Follow Up:</u> 12 months  | >90<95% = high,        | <u>Cost of Nonadherence:</u>                  |                             |
| 32 |                         | adherence with           | <u>Sample Size:</u> 267      | >50<90% =              | THC(≥95):\$42250 (\$52330.90),                |                             |
| 33 |                         | imatinib and             | (≥95%:120, 90-95%:25,        | intermediate,          | THC(90-95):\$39236 (\$48597.76),              |                             |
| 34 |                         | healthcare costs for US  | 50-90%:69, <50%:53)          | <50% = low)            | THC(50-90):\$54770 (\$67838.19),              |                             |
| 35 |                         | managed care patients.   |                              | <u>Method of</u>       | THC(<50):\$131357 (\$162698.93),              |                             |
| 36 |                         |                          |                              | <u>Assessment:</u>     | IC(≥95):\$1156 (\$1431.82),                   |                             |
| 37 |                         |                          |                              | pharmacy claims        | IC(90-95):\$1362 (\$1686.97),                 |                             |
| 38 |                         |                          |                              | data                   | IC(50-90):\$19096 (\$23652.33),               |                             |
| 39 |                         |                          |                              |                        | IC(<50):\$81572 (\$101035.18),                |                             |
| 40 |                         |                          |                              |                        |                                               |                             |
| 41 |                         |                          |                              |                        |                                               |                             |
| 42 |                         |                          |                              |                        |                                               |                             |
| 43 |                         |                          |                              |                        |                                               |                             |
| 44 |                         |                          |                              |                        |                                               |                             |
| 45 |                         |                          |                              |                        |                                               |                             |
| 46 |                         |                          |                              |                        |                                               |                             |
| 47 |                         |                          |                              |                        |                                               |                             |
| 48 |                         |                          |                              |                        |                                               |                             |
| 49 |                         |                          |                              |                        |                                               |                             |

For peer review

costs  
 Other costs  
 OC(≥95):\$9299 (\$11517.75),  
 OC(90-95):\$11148 (\$13807.93),  
 OC(50-90):\$14631 (\$18121.97),  
 OC(<50):\$33956 (\$42057.94),  
 EDC(≥95):\$36 (\$44.59),  
 EDC(90-95):\$568 (\$703.53),  
 EDC(50-90):\$104 (\$128.81),  
 EDC(<50):\$183 (\$226.66),  
 PC(≥95):\$29056 (\$35988.80),  
 PC(90-95):\$23693 (\$29346.18),  
 PC(50-90):\$18330 (\$22703.56),  
 PC(<50):\$8733 (\$10816.70),  
 OtPC(≥95):\$2462 (\$3049.44),  
 OtPC(90-95):\$2091 (\$2589.92),  
 OtPC(50-90):\$2238 (\$2771.99),  
 OtPC(<50):\$5732 (\$7099.66),  
 OtC(≥95):\$241 (\$298.50),  
 OtC(90-95):\$374 (\$463.24),  
 OtC(50-90):\$371 (\$459.52),  
 OtC(<50):\$1181 (\$1462.79)

|    |                                              |                                                                                                                 |                                                                                                                                      |                                                                                                                                                   |                                                                                                          |                                                                                                                                                                                                                                                                                                                            |                                                                   |
|----|----------------------------------------------|-----------------------------------------------------------------------------------------------------------------|--------------------------------------------------------------------------------------------------------------------------------------|---------------------------------------------------------------------------------------------------------------------------------------------------|----------------------------------------------------------------------------------------------------------|----------------------------------------------------------------------------------------------------------------------------------------------------------------------------------------------------------------------------------------------------------------------------------------------------------------------------|-------------------------------------------------------------------|
| 27 | <i>Wu et al</i> [69]                         | To examine the association between adherence with imatinib and direct healthcare costs and resource utilisation | <u>Design:</u> retrospective observational cohort analysis<br><u>Follow Up:</u> 12 months<br><u>Sample Size:</u> 592 (A:350, NA:242) | <u>Measure:</u> MPR<br><u>Classification:</u> (≥85% = high adherence, <85% = low adherence )<br><u>Method of Assessment:</u> pharmacy claims data | Total costs<br>Inpatient costs<br>Outpatient costs<br>ED costs<br>Pharmacy costs<br>Other pharmacy costs | <u>Type of Costs:</u> unadjusted<br><u>Classification:</u> disease state specific<br><u>Currency Year:</u> USD, 2008<br><u>Cost of Nonadherence:</u><br>TC:\$107341 (\$119415.73),<br>IC:\$44498 (\$49503.55),<br>OC:\$34097 (\$37932.55),<br>EDC:\$248 (\$275.90),<br>PC:\$22846 (\$25415.93),<br>OtPC:\$5652 (\$6287.79) | <u>Quality:</u> medium<br><u>Classification:</u> cost description |
| 38 | <b>Addiction</b><br><i>Leider et al</i> [70] | To assess the economic burden of chronic                                                                        | <u>Design:</u> retrospective claims based analysis                                                                                   | <u>Measure:</u> urine testing                                                                                                                     | Total healthcare                                                                                         | <u>Type of Costs:</u> unadjusted<br><u>Classification:</u> disease state specific                                                                                                                                                                                                                                          | <u>Quality:</u> medium<br><u>Classification:</u> cost             |



|    |                         |                       |                              |                        |                 |                                               |                             |
|----|-------------------------|-----------------------|------------------------------|------------------------|-----------------|-----------------------------------------------|-----------------------------|
| 1  |                         |                       |                              |                        |                 |                                               |                             |
| 2  |                         |                       |                              |                        |                 |                                               |                             |
| 3  |                         |                       |                              |                        |                 |                                               |                             |
| 4  |                         |                       |                              |                        |                 |                                               |                             |
| 5  | US                      | opioid users and to   | <u>Follow Up:</u> 12 months  | <u>Classification:</u> | costs           | <u>Currency Year:</u> USD, 2008               | analysis                    |
| 6  |                         | determine whether     | <u>Sample Size:</u> 2100     | (positive test =       | Inpatient costs | <u>Cost of Nonadherence:</u>                  |                             |
| 7  |                         | opioid regimen non-   | (A:442, NA:1658)             | nonadherent,           | Outpatient      | THC:\$26433 (\$29406.43),                     |                             |
| 8  |                         | adherence contributes |                              | negative test =        | costs           | IC:\$6361 (\$7076.55),                        |                             |
| 9  |                         | to increased          |                              | adherent )             | ED costs        | OC:\$9734 (\$10828.97),                       |                             |
| 10 |                         | healthcare costs.     |                              | <u>Method of</u>       | Pharmacy        | EDC:\$421 (\$468.36),                         |                             |
| 11 |                         |                       |                              | <u>Assessment:</u>     | costs           | PC:\$7960 (\$8855.42),                        |                             |
| 12 |                         |                       |                              | health claims data     | Medical costs   | MC:\$1957 (\$2177.14)                         |                             |
| 13 |                         |                       |                              | <u>Measure:</u> MPR    | Total           | <u>Type of Costs:</u> adjusted and unadjusted | <u>Quality:</u> medium      |
| 14 | <i>Tkacz et al</i> [71] | To estimate the       | <u>Design:</u> retrospective | <u>Classification:</u> | healthcare      | <u>Classification:</u> disease state specific | <u>Classification:</u> cost |
| 15 | 2014                    | healthcare service    | cohort analysis              | (≥80% = adherent,      | costs           | <u>Currency Year:</u> USD, 2010               | description                 |
| 16 | US                      | utilisation and costs | <u>Follow Up:</u> 12 months  | <80% =                 | Inpatient costs | <u>Cost of Nonadherence:</u>                  |                             |
| 17 |                         | associated with       | <u>Sample Size:</u> 455      | nonadherent)           | Outpatient      | Adjusted:                                     |                             |
| 18 |                         | buprenorphine         | (A:146, NA:309)              | <u>Method of</u>       | costs           | THC:\$49051 (\$53503.88),                     |                             |
| 19 |                         | medication assisted   |                              | <u>Assessment:</u>     | ED costs        | IC:\$26470 (\$28872.96),                      |                             |
| 20 |                         | therapy adherence     |                              | pharmacy claims        | Pharmacy        | OC:\$14570 (\$15892.67),                      |                             |
| 21 |                         | among a sample of     |                              | data                   | costs           | EDC:\$4439 (\$4841.98),                       |                             |
| 22 |                         | opioid dependent      |                              |                        |                 | PC:\$3581 (\$3906.09)                         |                             |
| 23 |                         | members.              |                              |                        |                 | Unadjusted:                                   |                             |
| 24 |                         |                       |                              |                        |                 | THC:\$47868 (\$52213.49),                     |                             |
| 25 |                         |                       |                              |                        |                 | IC:\$26043 (\$28407.20),                      |                             |
| 26 |                         |                       |                              |                        |                 | OC:\$14173 (\$15459.63),                      |                             |
| 27 |                         |                       |                              |                        |                 | EDC:\$4058 (\$4426.39),                       |                             |
| 28 |                         |                       |                              |                        |                 | PC:\$3557 (\$3879.91)                         |                             |
| 29 |                         |                       |                              |                        |                 |                                               |                             |
| 30 |                         |                       |                              |                        |                 |                                               |                             |
| 31 | <b>Metabolic</b>        |                       |                              |                        |                 |                                               |                             |
| 32 | <b>conditions other</b> |                       |                              |                        |                 |                                               |                             |
| 33 | <b>than diabetes</b>    |                       |                              |                        |                 |                                               |                             |
| 34 | <b>mellitus</b>         |                       |                              |                        |                 |                                               |                             |
| 35 | <i>Lee et al</i> [72]   | To assess the         | <u>Design:</u> retrospective | <u>Measure:</u> MPR    | Total costs     | <u>Type of Costs:</u> unadjusted              | <u>Quality:</u> medium      |
| 36 | 2011                    | relationship between  | cohort study                 | <u>Classification:</u> | Inpatient costs | <u>Classification:</u> all cause and disease  | <u>Classification:</u> cost |
| 37 | US                      | medication adherence  | <u>Follow Up:</u> 12 months  | (≥80% = high           | Outpatient      | state specific                                | description                 |
| 38 |                         | and healthcare costs  | <u>Sample Size:</u> 4923     | adherent, <80% =       | costs           | <u>Currency Year:</u> USD, 2010               |                             |
| 39 |                         | among US patients on  | (A:1372, NA:1304)            | low adherent)          | ED costs        | <u>Cost of Nonadherence:</u>                  |                             |
| 40 |                         |                       |                              |                        |                 |                                               |                             |
| 41 |                         |                       |                              |                        |                 |                                               |                             |
| 42 |                         |                       |                              |                        |                 |                                               |                             |
| 43 |                         |                       |                              |                        |                 |                                               |                             |
| 44 |                         |                       |                              |                        |                 |                                               |                             |
| 45 |                         |                       |                              |                        |                 |                                               |                             |
| 46 |                         |                       |                              |                        |                 |                                               |                             |
| 47 |                         |                       |                              |                        |                 |                                               |                             |
| 48 |                         |                       |                              |                        |                 |                                               |                             |
| 49 |                         |                       |                              |                        |                 |                                               |                             |

dialysis given  
cinacalcet to manage  
secondary  
hypoparathyroidism.

Method of  
Assessment:  
pharmacy claims  
data

Pharmacy  
costs  
Other  
pharmacy  
costs

All cause:  
PC:\$5556 (\$6060.38)  
Disease state specific:  
TC:\$126996 (\$138524.78),  
IC:\$14844 (\$16191.55),  
OC:\$101854 (\$111100.37),  
EDC:\$734 (\$800.63),  
PC:\$3244 (\$3538.49),  
OtPC:\$9564 (\$10432.23)

**Blood**

*Candrilli et al*[73]  
2011  
US

To investigate the  
relationships among  
hydroxyurea  
adherence, healthcare  
utilisation and  
healthcare costs.

Design: retrospective  
longitudinal study  
Follow Up: 12 months  
Sample Size: 312  
(A:110, NA:202)

Measure: MPR  
Classification:  
(≥80% = adherent,  
<80% =  
nonadherent)  
Method of  
Assessment:  
pharmacy claims  
data

Total costs  
Inpatient costs  
ED costs  
Pharmacy  
costs  
Physician  
office visit  
costs  
Ancillary costs

Type of Costs: adjusted  
Classification: all cause and disease  
state specific  
Currency Year: USD, 2008  
Cost of Nonadherence:  
All cause:  
TC:\$ 20436 (\$22734.83),  
IC:\$9780 (\$10880.15),  
EDC:\$837 (\$931.15),  
PC:\$2579 (\$2869.11),  
POC:\$3483 (\$3874.80),  
AC:\$3911 (\$4350.95)  
Disease state specific:  
TC:\$12097 (\$13457.78),  
IC:\$7315 (\$8137.86),  
EDC:\$552 (\$614.09),  
PC:\$158 (\$175.77),  
POC:\$1865 (\$2074.79),  
AC:\$2466 (\$2743.40)

Quality: medium  
Classification: cost  
description

**All**

*Alvarez Payero et  
al*[74]  
2014

To determine the  
profile of patients who  
are admitted to

Design: retrospective  
observational study  
Follow Up: 1527 days

Measure:  
pharmacy records  
Classification:

Hospitalization  
costs

Type of Costs: unadjusted  
Classification: all cause  
Currency Year: EUR, 2012

Quality: low  
Classification: cost  
outcome

1  
2  
3  
4  
5  
6  
7  
8  
9  
10  
11  
12  
13  
14  
15  
16  
17  
18  
19  
20  
21  
22  
23  
24  
25  
26  
27  
28  
29  
30  
31  
32  
33  
34  
35  
36  
37  
38  
39  
40  
41  
42  
43  
44  
45  
46  
47  
48  
49

|       |                                                                                                          |                                      |                                                                                                            |                                                                                      |             |
|-------|----------------------------------------------------------------------------------------------------------|--------------------------------------|------------------------------------------------------------------------------------------------------------|--------------------------------------------------------------------------------------|-------------|
| Spain | hospital as a result of non-adherence and to obtain an estimate of the economic impact for the hospital. | <u>Sample Size:</u> 87 (A:21, NA:66) | (>75% = adherent, ≤75% = nonadherent)<br><u>Method of Assessment:</u><br>pharmacy and hospital claims data | <u>Cost of Nonadherence<sup>####</sup>:</u><br>All cause:<br>HC:€6275.80 (\$8893.94) | description |
|-------|----------------------------------------------------------------------------------------------------------|--------------------------------------|------------------------------------------------------------------------------------------------------------|--------------------------------------------------------------------------------------|-------------|

A: adherent, NA: nonadherent, MA: moderate adherence, LA: low adherence, NC: noncompliance, NP: nonpersistent, P: persistent, T: turbulent, NE: no exposure, CHF: chronic heart failure, THC: total healthcare costs, TC: total costs, IC: inpatient costs, OC: outpatient costs, EDC: emergency department visit costs, PC: pharmacy costs, MC: medical costs, HC: hospitalization costs, POC: physician office visit costs, NPC: non-pharmacy costs, AC: ancillary costs, OtPC: other pharmacy costs, RC: radiology costs, SC: services costs, InstC: institutional costs, ESC: external services costs, MSC: medical services costs, PCC: primary care costs, MTC: medical test costs, FC: fracture costs, LC: laboratory costs, IntC: interdisciplinary costs, BHIC: behavioural health inpatient costs, STDC: short term disability costs, WCC: workers compensation costs, PTOC: paid time off costs, TPC: total productivity costs, AbC: absenteeism costs, PrC: presenteeism costs, OtC: other costs, com: commercial patients, med: Medicare supplemental patients, USD: United States dollar, GBP: Great British Pound, EUR: Euro, DKK: Danish krone, CAD: Canadian dollar, KRW: South Korean won

\*: extrapolated annual cost; \*\*: subgroups averaged; \*\*\*: national estimate of cost; \*\*\*\*: negative value as costs modelled against lowest adherence group; #: extrapolated annual cost and subgroups averaged; ##: cost represents losses in workplace productivity; ###: negative value as costs modelled against adherent group; ####: cost per episode of nonadherence

1. Aubert RE, Yao J, Xia F, et al. Is there a relationship between early statin compliance and a reduction in healthcare utilization? *The American journal of managed care* 2010;**16**:459-66
2. Casciano JP, Dotiwala ZJ, Martin BC, et al. The costs of warfarin underuse and nonadherence in patients with atrial fibrillation: a commercial insurer perspective. *Journal of managed care pharmacy : JMCP* 2013;**19**:302-16
3. Dilokthornsakul P, Chaiyakunapruk N, Nimpitakpong P, et al. The Effects of Medication Supply on Hospitalizations and Health-Care Costs in Patients with Chronic Heart Failure. *Value in Health* 2012;**15**:S9-S14 doi: 10.1016/j.jval.2011.11.019.
4. Dragomir A, Côté R, Roy L, et al. Impact of adherence to antihypertensive agents on clinical outcomes and hospitalization costs. *Medical care* 2010;**48**:418-25 doi: 10.1097/MLR.0b013e3181d567bd.
5. Dragomir A, Cote R, White M, et al. Relationship between adherence level to statins, clinical issues and health-care costs in real-life clinical setting. *Value in health : the journal of the International Society for Pharmacoeconomics and Outcomes Research* 2010;**13**(1):87-94 doi: 10.1111/j.1524-4733.2009.00583.x.
6. Pittman DG, Chen W, Bowlin SJ, et al. Adherence to statins, subsequent healthcare costs, and cardiovascular hospitalizations. *The American journal of cardiology* 2011;**107**:1662-6 doi: 10.1016/j.amjcard.2011.01.052.
7. Pittman DG, Tao Z, Chen W, et al. Antihypertensive medication adherence and subsequent healthcare utilization and costs. *The American journal of managed care* 2010;**16**:568-76
8. Rizzo JAS, W. R. Variations in compliance among hypertensive patients by drug class: implications for health care costs. *Clinical therapeutics* 1997;**19**(6):1446-57; discussion 24-5
9. Sokol MC, McGuigan KA, Verbrugge RR, et al. Impact of medication adherence on hospitalization risk and healthcare cost. *Medical care* 2005;**43**:521-30
10. Stroupe KT, Teal EY, Tu W, et al. Association of Refill Adherence and Health Care Use Among Adults with Hypertension in an Urban Health Care System. *Pharmacotherapy* 2006;**26**:779-89 doi: 10.1592/phco.26.6.779.
11. Wu J, Seiber E, Lacombe VA, et al. Medical utilization and costs associated with statin adherence in Medicaid enrollees with type 2 diabetes. *The Annals of pharmacotherapy* 2011;**45**:342-9 doi: 10.1345/aph.1P539.
12. Zhao Y, Zabriski S, Bertram C. Associations between statin adherence level, health care costs, and utilization. *Journal of managed care & specialty pharmacy* 2014;**20**:703-13
13. Bagalman E, Yu-Isenberg KS, Durden E, et al. Indirect costs associated with nonadherence to treatment for bipolar disorder. *Journal of occupational and environmental medicine / American College of Occupational and Environmental Medicine* 2010;**52**:478-85 doi: 10.1097/JOM.0b013e3181db811d.
14. Becker MA, Young MS, Ochshorn E, et al. The relationship of antipsychotic medication class and adherence with treatment outcomes and costs for Florida Medicaid beneficiaries with schizophrenia. *Administration and policy in mental health* 2007;**34**:307-14 doi: 10.1007/s10488-006-0108-5.
15. Eaddy M, Grogg A, Locklear J. Assessment of compliance with antipsychotic treatment and resource utilization in a Medicaid population. *Clinical therapeutics* 2005;**27**:263-72 doi: 10.1016/j.clinthera.2005.02.003.
16. Gilmer TP, Dolder CR, Lacro JP, et al. Adherence to treatment with antipsychotic medication and health care costs among Medicaid beneficiaries with schizophrenia. *The American journal of psychiatry* 2004;**161**:692-9

17. Hong J, Reed C, Novick D, et al. Clinical and economic consequences of medication non-adherence in the treatment of patients with a manic/mixed episode of bipolar disorder: results from the European Mania in Bipolar Longitudinal Evaluation of Medication (EMBLEM) study. *Psychiatry research* 2011;**190**:110-4 doi: 10.1016/j.psychres.2011.04.016.
18. Jiang Y, Ni W. Estimating the Impact of Adherence to and Persistence with Atypical Antipsychotic Therapy on Health Care Costs and Risk of Hospitalization. *Pharmacotherapy* 2015;**35**(9):813-22 doi: 10.1002/phar.1634.
19. Joe S, Lee JS. Association between non-compliance with psychiatric treatment and non-psychiatric service utilization and costs in patients with schizophrenia and related disorders. *BMC psychiatry* 2016;**16**(1):444 doi: 10.1186/s12888-016-1156-3.
20. Knapp M, King D, Pugner K, et al. Non-adherence to antipsychotic medication regimens: associations with resource use and costs. *The British journal of psychiatry : the journal of mental science* 2004;**184**:509-16
21. Offord S, Lin J, Mirski D, et al. Impact of early nonadherence to oral antipsychotics on clinical and economic outcomes among patients with schizophrenia. *Advances in therapy* 2013;**30**:286-97 doi: 10.1007/s12325-013-0016-5.
22. Offord S, Lin J, Wong B, et al. Impact of oral antipsychotic medication adherence on healthcare resource utilization among schizophrenia patients with Medicare coverage. *Community mental health journal* 2013;**49**:625-9 doi: 10.1007/s10597-013-9638-y.
23. Robinson RL, Long SR, Chang S, et al. Higher costs and therapeutic factors associated with adherence to NCQA HEDIS antidepressant medication management measures: analysis of administrative claims. *Journal of managed care pharmacy : JMCP* 2006;**12**:43-54
24. Svarstad BL, Shireman TI, Sweeney JK. Using drug claims data to assess the relationship of medication adherence with hospitalization and costs. *Psychiatric services (Washington, DC)* 2001;**52**:805-11
25. White TJV, Ann; Ory, Caron; Dezii, Christopher M.; Chang, Eunice. Economic Impact of Patient Adherence with Antidepressant Therapy Within a Managed Care Organization. *Disease Management & Health Outcomes* 2003;**11**(12):817-22 doi: 10.2165/00115677-200311120-00006.
26. An S-Y, Kim HJ, Chun KH, et al. Clinical and economic outcomes in medication-adherent and -nonadherent patients with type 2 diabetes mellitus in the Republic of Korea. *Clinical therapeutics* 2014;**36**:245-54 doi: 10.1016/j.clinthera.2013.12.012.
27. Egede LE, Gebregziabher M, Dismuke CE, et al. Medication Nonadherence in Diabetes: Longitudinal effects on costs and potential cost savings from improvement. *Diabetes care* 2012;**35**:2533-39 doi: 10.2337/dc12-0572.
28. Gentil L, Vasiliadis HM, Preville M, et al. Adherence to Oral Antihyperglycemic Agents Among Older Adults With Mental Disorders and Its Effect on Health Care Costs, Quebec, Canada, 2005-2008. *Preventing chronic disease* 2015;**12**:E230 doi: 10.5888/pcd12.150412.
29. Hagen SE, Wright DW, Finch R, et al. Impact of compliance to oral hypoglycemic agents on short-term disability costs in an employer population. *Population health management* 2014;**17**:35-41 doi: 10.1089/pop.2013.0009.
30. Hansen RA, Farley JF, Droege M, et al. A retrospective cohort study of economic outcomes and adherence to monotherapy with metformin, pioglitazone, or a sulfonyleurea among patients with type 2 diabetes mellitus in the United States from 2003 to 2005. *Clinical therapeutics* 2010;**32**:1308-19 doi: 10.1016/j.clinthera.2010.07.011.
31. Hong JS, Kang HC. Relationship between oral antihyperglycemic medication adherence and hospitalization, mortality, and healthcare costs in adult ambulatory care patients with type 2 diabetes in South Korea. *Medical care* 2011;**49**:378-84 doi: 10.1097/MLR.0b013e31820292d1.

- 1  
2  
3  
4  
5  
6  
7  
8  
9  
10  
11  
12  
13  
14  
15  
16  
17  
18  
19  
20  
21  
22  
23  
24  
25  
26  
27  
28  
29  
30  
31  
32  
33  
34  
35  
36  
37  
38  
39  
40  
41  
42  
43  
44  
45  
46  
47  
48  
49
32. Jha AK, Aubert RE, Yao J, et al. Greater adherence to diabetes drugs is linked to less hospital use and could save nearly \$5 billion annually. *Health affairs (Project Hope)* 2012;**31**:1836-46 doi: 10.1377/hlthaff.2011.1198.
  33. White TJV, Ann; Chang, Eunice; Dezii, Christopher M.; Abrams, Geoffrey D. The Costs of Non-Adherence to Oral Antihyperglycemic Medication in Individuals with Diabetes Mellitus and Concomitant Diabetes Mellitus and Cardiovascular Disease in a Managed Care Environment. *Disease Management & Health Outcomes* 2004;**12**(3):181-88 doi: 10.2165/00115677-200412030-00004.
  34. Wu N, Chen S, Boulanger L, et al. Duloxetine compliance and its association with healthcare costs among patients with diabetic peripheral neuropathic pain. *Journal of medical economics* 2009;**12**:192-202 doi: 10.3111/13696990903240559.
  35. Briesacher BA, Andrade SE, Yood RA, et al. Consequences of poor compliance with bisphosphonates. *Bone* 2007;**41**:882-7 doi: 10.1016/j.bone.2007.07.009.
  36. Eisenberg DF, Placzek H, Gu T, et al. Cost and consequences of noncompliance to oral bisphosphonate treatment. *Journal of managed care & specialty pharmacy* 2015;**21**(1):56-65 doi: 10.18553/jmcp.2015.21.1.56.
  37. Halpern R, Becker L, Iqbal SU, et al. The association of adherence to osteoporosis therapies with fracture, all-cause medical costs, and all-cause hospitalizations: a retrospective claims analysis of female health plan enrollees with osteoporosis. *Journal of managed care pharmacy : JMCP* 2011;**17**:25-39
  38. Hazel-Fernandez L, Louder AM, Foster SA, et al. Association of teriparatide adherence and persistence with clinical and economic outcomes in Medicare Part D recipients: a retrospective cohort study. *BMC musculoskeletal disorders* 2013;**14**:4 doi: 10.1186/1471-2474-14-4.
  39. Huybrechts KF, Ishak KJ, Caro JJ. Assessment of compliance with osteoporosis treatment and its consequences in a managed care population. *Bone* 2006;**38**:922-8 doi: 10.1016/j.bone.2005.10.022.
  40. Kjellberg J, Jorgensen AD, Vestergaard P, et al. Cost and health care resource use associated with noncompliance with oral bisphosphonate therapy: an analysis using Danish health registries. *Osteoporosis International* 2016;**27**(12):3535-41 doi: 10.1007/s00198-016-3683-7.
  41. Modi A, Siris ES, Tang J, et al. Cost and consequences of noncompliance with osteoporosis treatment among women initiating therapy. *Current medical research and opinion* 2015;**31**(4):757-65 doi: 10.1185/03007995.2015.1016605.
  42. Olsen KR, Hansen C, Abrahamsen B. Association between refill compliance to oral bisphosphonate treatment, incident fractures, and health care costs--an analysis using national health databases. *Osteoporosis international : a journal established as result of cooperation between the European Foundation for Osteoporosis and the National Osteoporosis Foundation of the USA* 2013;**24**:2639-47 doi: 10.1007/s00198-013-2365-y.
  43. Sunyecz JA, Mucha L, Baser O, et al. Impact of compliance and persistence with bisphosphonate therapy on health care costs and utilization. *Osteoporosis international : a journal established as result of cooperation between the European Foundation for Osteoporosis and the National Osteoporosis Foundation of the USA* 2008;**19**:1421-9 doi: 10.1007/s00198-008-0586-2.
  44. Zhao Y, Johnston SS, Smith DM, et al. Association between teriparatide adherence and healthcare utilization and costs among hip fracture patients in the United States. *Bone* 2014;**60**:221-6 doi: 10.1016/j.bone.2013.12.016.
  45. Zhao Y, Johnston SS, Smith DM, et al. Association between teriparatide adherence and healthcare utilization and costs in real-world US kyphoplasty/vertebroplasty patients. *Osteoporosis International* 2013;**24**:2525-33 doi: 10.1007/s00198-013-2324-7.

- 1
- 2
- 3
- 4
- 5 46. Delea TE, Stanford RH, Hagiwara M, et al. Association between adherence with fixed dose combination fluticasone propionate/salmeterol on asthma
- 6 outcomes and costs\*. *Current medical research and opinion* 2008;**24**:3435-42 doi: 10.1185/03007990802557344[.
- 7
- 8 47. Diehl JL, Daw JR, Coley KC, et al. Medical utilization associated with palivizumab compliance in a commercial and managed medicaid health plan. *Journal*
- 9 *of managed care pharmacy* : JMCP 2010;**16**:23-31
- 10 48. Joshi AV, Madhavan SS, Ambegaonkar A, et al. Association of medication adherence with workplace productivity and health-related quality of life in
- 11 patients with asthma. *The Journal of asthma : official journal of the Association for the Care of Asthma* 2006;**43**:521-6 doi:
- 12 10.1080/02770900600857010.
- 13 49. Miravittles M, Sicras A, Crespo C, et al. Costs of chronic obstructive pulmonary disease in relation to compliance with guidelines: a study in the primary
- 14 care setting. *Therapeutic advances in respiratory disease* 2013;**7**:139-50 doi: 10.1177/1753465813484080.
- 15 50. Quittner AL, Zhang J, Marynchenko M, et al. Pulmonary medication adherence and health-care use in cystic fibrosis. *Chest* 2014;**146**:142-51 doi:
- 16 10.1378/chest.13-1926.
- 17 51. Carter CT, Waters HC, Smith DB. Impact of infliximab adherence on Crohn's disease-related healthcare utilization and inpatient costs. *Advances in*
- 18 *therapy* 2011;**28**:671-83 doi: 10.1007/s12325-011-0048-7.
- 19 52. Gosselin A, Luo R, Lohoues H, et al. The impact of proton pump inhibitor compliance on health-care resource utilization and costs in patients with
- 20 gastroesophageal reflux disease. *Value in health : the journal of the International Society for Pharmacoeconomics and Outcomes Research*
- 21 2009;**12**:34-9 doi: 10.1111/j.1524-4733.2008.00399.x.
- 22 53. Kane SV, Chao J, Mulani PM. Adherence to infliximab maintenance therapy and health care utilization and costs by Crohn's disease patients. *Advances in*
- 23 *therapy* 2009;**26**:936-46 doi: 10.1007/s12325-009-0069-7.
- 24 54. Mitra D, Hodgkins P, Yen L, et al. Association between oral 5-ASA adherence and health care utilization and costs among patients with active ulcerative
- 25 colitis. *BMC gastroenterology* 2012;**12**:132 doi: 10.1186/1471-230X-12-132.
- 26 55. Wan GJ, Kozma CM, Slaton TL, et al. Inflammatory bowel disease: healthcare costs for patients who are adherent or non-adherent with infliximab
- 27 therapy. *Journal of medical economics* 2014;**17**:384-93 doi: 10.3111/13696998.2014.909436.
- 28 56. Davis KLC, S. D.; Edin, H. M. Prevalence and cost of nonadherence with antiepileptic drugs in an adult managed care population. *Epilepsia*
- 29 2008;**49**(3):446-54 doi: 10.1111/j.1528-1167.2007.01414.x.
- 30 57. Ettinger AB, Manjunath R, Candrilli SD, et al. Prevalence and cost of nonadherence to antiepileptic drugs in elderly patients with epilepsy. *Epilepsy &*
- 31 *behavior* : E&B 2009;**14**:324-9 doi: 10.1016/j.yebeh.2008.10.021.
- 32 58. Faught RE, Weiner JR, Guérin A, et al. Impact of nonadherence to antiepileptic drugs on health care utilization and costs: findings from the RANSOM
- 33 study. *Epilepsia* 2009;**50**:501-9 doi: 10.1111/j.1528-1167.2008.01794.x.
- 34 59. Barnett PG, Chow A, Joyce VR, et al. Determinants of the Cost of Health Services Used by Veterans With HIV. *Medical care* 2011;**49**:848-56 doi:
- 35 10.1097/MLR.0b013e31821b34c0.
- 36 60. Cooke CE, Lee HY, Xing S. Adherence to antiretroviral therapy in managed care members in the United States: a retrospective claims analysis. *Journal of*
- 37 *managed care pharmacy* : JMCP 2014;**20**:86-92
- 38
- 39
- 40
- 41
- 42
- 43
- 44
- 45
- 46
- 47
- 48
- 49

- 1
- 2
- 3
- 4
- 5 61. Pruitt Z, Robst J, Languard-Orban B, et al. Healthcare costs associated with antiretroviral adherence among medicaid patients. *Applied health economics and health policy* 2015;**13**:69-80 doi: 10.1007/s40258-014-0138-1.
- 6
- 7 62. Davis KL, Edin HM, Allen JK. Prevalence and cost of medication nonadherence in Parkinson's disease: evidence from administrative claims data. *Movement disorders : official journal of the Movement Disorder Society* 2010;**25**(4):474-80 doi: 10.1002/mds.22999.
- 8
- 9 63. Delea TE, Thomas SK, Hagiwara M. The association between adherence to levodopa/carbidopa/entacapone therapy and healthcare utilization and costs among patients with Parkinson's disease: a retrospective claims-based analysis. *CNS drugs* 2011;**25**:53-66 doi: 10.2165/11538970-000000000-00000.
- 10
- 11 64. Wei Y-J, Palumbo FB, Simoni-Wastila L, et al. Antiparkinson drug adherence and its association with health care utilization and economic outcomes in a Medicare Part D population. *Value in health : the journal of the International Society for Pharmacoeconomics and Outcomes Research* 2014;**17**:196-204 doi: 10.1016/j.jval.2013.12.003.
- 12
- 13 65. Ivanova JI, Bergman RE, Birnbaum HG, et al. Impact of medication adherence to disease-modifying drugs on severe relapse, and direct and indirect costs among employees with multiple sclerosis in the US. *Journal of medical economics* 2012;**15**:601-9 doi: 10.3111/13696998.2012.667027.
- 14
- 15 66. Tan H, Cai Q, Agarwal S, et al. Impact of adherence to disease-modifying therapies on clinical and economic outcomes among patients with multiple sclerosis. *Advances in therapy* 2011;**28**:51-61 doi: 10.1007/s12325-010-0093-7.
- 16
- 17 67. Zhao Y, Chen S-Y, Wu N, et al. Medication Adherence and Healthcare Costs among Fibromyalgia Patients Treated with Duloxetine. *Pain Practice* 2011;**11**:381-91 doi: 10.1111/j.1533-2500.2010.00431.x.
- 18
- 19 68. Darkow T, Henk HJ, Thomas SK, et al. Treatment interruptions and non-adherence with imatinib and associated healthcare costs: a retrospective analysis among managed care patients with chronic myelogenous leukaemia. *PharmacoEconomics* 2007;**25**:481-96
- 20
- 21 69. Wu EQ, Johnson S, Beaulieu N, et al. Healthcare resource utilization and costs associated with non-adherence to imatinib treatment in chronic myeloid leukemia patients. *Current medical research and opinion* 2010;**26**:61-69 doi: 10.1185/03007990903396469.
- 22
- 23 70. Leider HL, Dhaliwal J, Davis EJ, et al. Healthcare costs and nonadherence among chronic opioid users. *The American journal of managed care* 2011;**17**:32-40
- 24
- 25 71. Tkacz J, Volpicelli J, Un H, et al. Relationship between buprenorphine adherence and health service utilization and costs among opioid dependent patients. *Journal of substance abuse treatment* 2014;**46**:456-62 doi: 10.1016/j.jsat.2013.10.014.
- 26
- 27 72. Lee A, Song X, Khan I, et al. Association of cinacalcet adherence and costs in patients on dialysis. *Journal of medical economics* 2011;**14**:798-804 doi: 10.3111/13696998.2011.627404.
- 28
- 29 73. Candrilli SD, O'Brien SH, Ware RE, et al. Hydroxyurea adherence and associated outcomes among Medicaid enrollees with sickle cell disease. *American journal of hematology* 2011;**86**:273-7 doi: 10.1002/ajh.21968.
- 30
- 31 74. Alvarez Payero M, Martinez Lopez de Castro N, Ucha Samartin M, et al. Medication non-adherence as a cause of hospital admissions. *Farmacia hospitalaria : organo oficial de expresion cientifica de la Sociedad Espanola de Farmacia Hospitalaria* 2014;**38**(4):328-33 doi: 10.7399/fh.2014.38.4.7660.
- 32
- 33
- 34
- 35
- 36
- 37
- 38
- 39
- 40
- 41
- 42
- 43
- 44
- 45
- 46
- 47
- 48
- 49



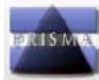

# PRISMA 2009 Checklist

| Section/topic                      | #  | Checklist item                                                                                                                                                                                                                                                                                              | Reported on page # |
|------------------------------------|----|-------------------------------------------------------------------------------------------------------------------------------------------------------------------------------------------------------------------------------------------------------------------------------------------------------------|--------------------|
| <b>TITLE</b>                       |    |                                                                                                                                                                                                                                                                                                             |                    |
| Title                              | 1  | Identify the report as a systematic review, meta-analysis, or both.                                                                                                                                                                                                                                         | 1                  |
| <b>ABSTRACT</b>                    |    |                                                                                                                                                                                                                                                                                                             |                    |
| Structured summary                 | 2  | Provide a structured summary including, as applicable: background; objectives; data sources; study eligibility criteria, participants, and interventions; study appraisal and synthesis methods; results; limitations; conclusions and implications of key findings; systematic review registration number. | 2                  |
| <b>INTRODUCTION</b>                |    |                                                                                                                                                                                                                                                                                                             |                    |
| Rationale                          | 3  | Describe the rationale for the review in the context of what is already known.                                                                                                                                                                                                                              | 4                  |
| Objectives                         | 4  | Provide an explicit statement of questions being addressed with reference to participants, interventions, comparisons, outcomes, and study design (PICOS).                                                                                                                                                  | 4                  |
| <b>METHODS</b>                     |    |                                                                                                                                                                                                                                                                                                             |                    |
| Protocol and registration          | 5  | Indicate if a review protocol exists, if and where it can be accessed (e.g., Web address), and, if available, provide registration information including registration number.                                                                                                                               | 5                  |
| Eligibility criteria               | 6  | Specify study characteristics (e.g., PICOS, length of follow-up) and report characteristics (e.g., years considered, language, publication status) used as criteria for eligibility, giving rationale.                                                                                                      | 5                  |
| Information sources                | 7  | Describe all information sources (e.g., databases with dates of coverage, contact with study authors to identify additional studies) in the search and date last searched.                                                                                                                                  | 5                  |
| Search                             | 8  | Present full electronic search strategy for at least one database, including any limits used, such that it could be repeated.                                                                                                                                                                               | 5                  |
| Study selection                    | 9  | State the process for selecting studies (i.e., screening, eligibility, included in systematic review, and, if applicable, included in the meta-analysis).                                                                                                                                                   | 5                  |
| Data collection process            | 10 | Describe method of data extraction from reports (e.g., piloted forms, independently, in duplicate) and any processes for obtaining and confirming data from investigators.                                                                                                                                  | 5-6                |
| Data items                         | 11 | List and define all variables for which data were sought (e.g., PICOS, funding sources) and any assumptions and simplifications made.                                                                                                                                                                       | 5-7                |
| Risk of bias in individual studies | 12 | Describe methods used for assessing risk of bias of individual studies (including specification of whether this was done at the study or outcome level), and how this information is to be used in any data synthesis.                                                                                      | 6-7                |
| Summary measures                   | 13 | State the principal summary measures (e.g., risk ratio, difference in means).                                                                                                                                                                                                                               | n/a                |
| Synthesis of results               | 14 | Describe the methods of handling data and combining results of studies, if done, including measures of consistency (e.g., $I^2$ ) for each meta-analysis.                                                                                                                                                   | 6-7                |

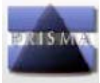

# PRISMA 2009 Checklist

| Section/topic                 | #  | Checklist item                                                                                                                                                                                           | Reported on page # |
|-------------------------------|----|----------------------------------------------------------------------------------------------------------------------------------------------------------------------------------------------------------|--------------------|
| Risk of bias across studies   | 15 | Specify any assessment of risk of bias that may affect the cumulative evidence (e.g., publication bias, selective reporting within studies).                                                             | 6-7                |
| Additional analyses           | 16 | Describe methods of additional analyses (e.g., sensitivity or subgroup analyses, meta-regression), if done, indicating which were pre-specified.                                                         | n/a                |
| <b>RESULTS</b>                |    |                                                                                                                                                                                                          |                    |
| Study selection               | 17 | Give numbers of studies screened, assessed for eligibility, and included in the review, with reasons for exclusions at each stage, ideally with a flow diagram.                                          | 8                  |
| Study characteristics         | 18 | For each study, present characteristics for which data were extracted (e.g., study size, PICOS, follow-up period) and provide the citations.                                                             | 9                  |
| Risk of bias within studies   | 19 | Present data on risk of bias of each study and, if available, any outcome level assessment (see item 12).                                                                                                | 10                 |
| Results of individual studies | 20 | For all outcomes considered (benefits or harms), present, for each study: (a) simple summary data for each intervention group (b) effect estimates and confidence intervals, ideally with a forest plot. | supp               |
| Synthesis of results          | 21 | Present results of each meta-analysis done, including confidence intervals and measures of consistency.                                                                                                  | 11-19              |
| Risk of bias across studies   | 22 | Present results of any assessment of risk of bias across studies (see Item 15).                                                                                                                          | supp               |
| Additional analysis           | 23 | Give results of additional analyses, if done (e.g., sensitivity or subgroup analyses, meta-regression [see Item 16]).                                                                                    | n/a                |
| <b>DISCUSSION</b>             |    |                                                                                                                                                                                                          |                    |
| Summary of evidence           | 24 | Summarize the main findings including the strength of evidence for each main outcome; consider their relevance to key groups (e.g., healthcare providers, users, and policy makers).                     | 20-22              |
| Limitations                   | 25 | Discuss limitations at study and outcome level (e.g., risk of bias), and at review-level (e.g., incomplete retrieval of identified research, reporting bias).                                            | 21-22              |
| Conclusions                   | 26 | Provide a general interpretation of the results in the context of other evidence, and implications for future research.                                                                                  | 23                 |
| <b>FUNDING</b>                |    |                                                                                                                                                                                                          |                    |
| Funding                       | 27 | Describe sources of funding for the systematic review and other support (e.g., supply of data); role of funders for the systematic review.                                                               | 24                 |

From: Moher D, Liberati A, Tetzlaff J, Altman DG, The PRISMA Group (2009). Preferred Reporting Items for Systematic Reviews and Meta-Analyses: The PRISMA Statement. PLoS Med 6(7): e1000097. doi:10.1371/journal.pmed1000097

For more information, visit: [www.prisma-statement.org](http://www.prisma-statement.org).

# BMJ Open

## Economic impact of medication nonadherence by disease groups: a systematic review

|                                 |                                                                                                                                                                                                                                                                                                                                                                                                                                                                                                            |
|---------------------------------|------------------------------------------------------------------------------------------------------------------------------------------------------------------------------------------------------------------------------------------------------------------------------------------------------------------------------------------------------------------------------------------------------------------------------------------------------------------------------------------------------------|
| Journal:                        | <i>BMJ Open</i>                                                                                                                                                                                                                                                                                                                                                                                                                                                                                            |
| Manuscript ID                   | bmjopen-2017-016982.R1                                                                                                                                                                                                                                                                                                                                                                                                                                                                                     |
| Article Type:                   | Research                                                                                                                                                                                                                                                                                                                                                                                                                                                                                                   |
| Date Submitted by the Author:   | 23-Aug-2017                                                                                                                                                                                                                                                                                                                                                                                                                                                                                                |
| Complete List of Authors:       | Cutler, Rachelle; University of Technology, Sydney, Australia, Graduate School of Health; Pharmacy<br>Fernandez-Llimos, Fernando; Universidade de Lisboa Instituto de Investigacao do Medicamento, Social Pharmacy<br>Frommer, Michael; University of Sydney Sydney Medical School, Sydney Medical School<br>Benrimoj, Charlie; University of Technology, Sydney, graduate school of health<br>Garcia Cardenas, Victoria; University of Technology, Sydney, Australia, Graduate School of Health; Pharmacy |
| <b>Primary Subject Heading</b>: | Health services research                                                                                                                                                                                                                                                                                                                                                                                                                                                                                   |
| Secondary Subject Heading:      | Global health, Health economics, Health policy, Public health                                                                                                                                                                                                                                                                                                                                                                                                                                              |
| Keywords:                       | Health economics < HEALTH SERVICES ADMINISTRATION & MANAGEMENT, Health policy < HEALTH SERVICES ADMINISTRATION & MANAGEMENT, Quality in health care < HEALTH SERVICES ADMINISTRATION & MANAGEMENT, HEALTH ECONOMICS, PUBLIC HEALTH                                                                                                                                                                                                                                                                         |
|                                 |                                                                                                                                                                                                                                                                                                                                                                                                                                                                                                            |

SCHOLARONE™  
Manuscripts

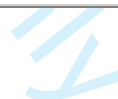

**Title Page**

**Title:** Economic impact of medication nonadherence by disease groups: a systematic review

**Authors:**

Rachelle L Cutler  
Graduate School of Health  
University of Technology Sydney, Sydney  
Australia

Fernando Fernandez-Llimos  
Research Institute for Medicines (iMed.Ulisboa), Department of Social Pharmacy  
Faculty of Pharmacy, University of Lisbon, Lisbon  
Portugal

Michael Frommer  
Sydney Medical School  
The University of Sydney  
Australia

Shalom I (Charlie) Benrimoj  
Graduate School of Health  
University of Technology Sydney, Sydney  
Australia

Victoria Garcia-Cardenas  
Graduate School of Health  
University of Technology Sydney, Sydney  
Australia

**Corresponding Author:**

Rachelle L Cutler  
Graduate School of Health  
University of Technology Sydney  
City Campus, Broadway, Building 7, Lvl 4, Room 04.02182  
PO Box 123, Broadway NSW 2007 Australia  
rachelle.cutler@uts.edu.au  
+61 2 95147187

**Word Count:**

5913

## Abstract

**Objective:** To determine the economic impact of medication nonadherence across multiple disease groups.

**Design:** Systematic review.

**Evidence Review:** A comprehensive literature search was conducted in PubMed and Scopus in March 2017. Studies quantifying the cost of medication nonadherence in relation to economic impact were included. Relevant information was extracted and quality assessed using the Drummond checklist.

**Results:** Seventy five individual studies assessing the cost of medication nonadherence across fourteen disease groups were included. Wide scoping cost variations were reported, with lower levels of adherence generally associated with higher total costs. The annual adjusted disease specific economic cost of nonadherence per person ranged from \$949-\$53,504 (in 2015 US dollars). Costs attributed to “all causes” nonadherence ranged from \$5,271 to \$52,341. Medication possession ratio was the metric most utilized to calculate patient adherence, with varying cut-off points defining nonadherence. The main indicators used to measure the cost of nonadherence were total cost or total healthcare cost (81% of studies), pharmacy costs (72%), inpatient costs (51%), outpatient costs (51%), emergency department visit costs (30%), medical costs (27%) and hospitalization costs (18%). Drummond quality assessment yielded 10 studies of high quality with all studies performing partial economic evaluations to varying extents.

**Conclusion:** Medication nonadherence places a significant cost burden on healthcare systems. Current research assessing the economic impact of medication nonadherence is limited and of varying quality, failing to provide adaptable data to influence health policy. The correlation between increased nonadherence and higher disease prevalence should be used to inform policy makers to help circumvent avoidable costs to the healthcare system. Differences in methods make the comparison amongst studies challenging and an accurate estimation of true magnitude of the cost impossible. Standardization of the metric measures used to estimate medication nonadherence and development of a streamlined approach to quantify costs is required.

**Registration:** CRD42015027338

**Strengths and Limitations of this study:**

- This is a novel attempt to use existing studies to broaden the scope of knowledge associated with the economic impact of medication nonadherence via quantifying the cost of medication nonadherence across different disease groups.
- A large comprehensive review – 2,692 citations identified, 75 studies included.
- Inability to perform a meaningful meta-analysis- insufficient statistical data and considerable heterogeneity according to outcome/indicators.
- Robust application of adapted Drummond checklist to evaluate the quality of economic evaluations.

## 1 Introduction

Nearly half of all adults and approximately 8% of children (aged 5-17 years) worldwide have a chronic condition[1]. This, together with ageing populations, is increasing the demand on healthcare resources. [2]. Medications are a cost-effective treatment modality[3], but intentional and unintentional inappropriate medication use by patients is common, mostly through differing degrees of adherence termed medication nonadherence. Medication adherence is defined as ‘the extent to which the patients’ behavior matches agreed recommendations from the prescriber’, emphasising the importance on the patients’ decisions and highlighting the modifiable aspect of nonadherence[4].

With estimates of 50% nonadherence to long term therapy for chronic illnesses[5], efforts to improve medication adherence represent an opportunity to improve health outcomes and health system efficiency. The clinical, economic and human consequences of medication nonadherence pose significant burdens. Estimates of the costs range from US\$100-\$290 billion[6] in the United States, €1.25 billion[7] in Europe and approximately A\$7 billion[8 9] in Australia. As well as substantially increasing healthcare costs, nonadherence compromises the effective use of medicines, can decrease patients’ quality of life, increases the risk of medication misadventures, can lead to poor health outcomes, and can result in preventable hospitalizations[10]. Ten percent of hospitalizations in older adults are attributed to medication nonadherence [11 12] with the typical nonadherent patient requiring three extra medical visits per year leading to \$2000 increased treatment costs per annum[13]. In diabetes the estimated costs savings associated with improving medication nonadherence range from \$661 million to \$1.16 billion [14]. Nonadherence is thus a critical clinical and economic problem[5] .

An understanding of the economic impact of medication nonadherence on the healthcare system can influence health policy. While the cost of nonadherence for some disease groups has already been analyzed with varying findings, no systematic reviews provide a holistic and comparative picture across disease groups. Policymakers have repeatedly relied on cost effectiveness analysis to help healthcare systems deal with the rising costs of care[15]. However there is still a budgetary problem that needs to be considered. Quantifying the cost of medication nonadherence is a necessary element to allow valuable correlation between healthcare resource use associated with higher disease prevalence and costs associated with medication nonadherence to be drawn. The objective of this systematic review was, first, to determine the economic impact of medication nonadherence across multiple disease groups, and second, to review and critically appraise the

1  
2  
3  
4  
5  
6  
7  
8  
9  
10  
11  
12  
13  
14  
15  
16  
17  
18  
19  
20  
21  
22  
23  
24  
25  
26  
27  
28  
29  
30  
31  
32  
33  
34  
35  
36  
37  
38  
39  
40  
41  
42  
43  
44  
45  
46  
47  
48  
49  
50  
51  
52  
53  
54  
55  
56  
57  
58  
59  
60

literature to identify the main methodological issues that may explain the differences among reports in the cost calculation and classification of nonadherence.

For peer review only



## 2 Methods

The protocol for this systematic review was registered on the PROSPERO: International prospective register of systematic reviews database (CRD42015027338) and can be accessed at [http://www.crd.york.ac.uk/PROSPERO/display\\_record.asp?ID=CRD42015027338](http://www.crd.york.ac.uk/PROSPERO/display_record.asp?ID=CRD42015027338). The systematic review was undertaken in accordance with PRISMA guidelines[16].

### 2.1 Search strategy and selection criteria

A literature search was conducted in March 2017. Studies reporting the cost of medication nonadherence for any disease state were included. Searches were conducted in PubMed and Scopus. Neither publication date nor language restriction filters were used. The search used in PubMed was: (non-adherence[TIAB]) OR (“Patient Compliance”[MH] AND (“Drug Therapy”[MH]) OR medication[TIAB])) OR “Medication adherence”[MH] AND (costs[TIAB] OR “Costs and Cost Analysis”[MH] OR burden[TIAB]). This was adapted for other databases (eTable 1). Duplicate records were removed.

To identify relevant articles, an initial title and abstract screening was conducted by the lead reviewer (RC) to identify studies appropriate to the study question. This process was over-inclusive. In the second phase appraisal, potentially relevant full text papers were read and excluded based on the following criteria: i) papers not reporting the cost of medication nonadherence, ii) systematic reviews, iii) papers not reporting a baseline cost of medication nonadherence prior to the provision of an intervention and iv) papers not reporting original data. Any uncertainty was discussed amongst two adherence experts (RC and VGC) and resolved via consensus.

### 2.2 Extracted information

A data extraction form was developed based on the Cochrane Handbook for systematic reviews[17] and piloted on a sample of included studies. The extracted information included the source (study identification, citation and title), eligibility (confirmation of inclusion criteria), objective, methods (study design, study groups, year data extracted, follow up period, comparison, adherence measure, adherence data source and adherence definition), population (sample size, setting, country, disease state/drug studied, inclusion/exclusion criteria and perspective), impact/outcome indicators (indicators measured, indicator data source, indicator definitions and characteristics of the method of assessment), results (costs reported, standardized costs, type of costs, non-cost findings, sub-

1  
2  
3 group analysis and statistical significance), conclusions and miscellaneous (funding source,  
4 references to other relevant studies, limitations and reviewers comments).  
5

6  
7 Costs were defined as any indicator associated with medication nonadherence that was quantified  
8 with a monetary value in the original study. This included direct costs (those costs borne by the  
9 healthcare system, community and patients' families in addressing the illness), indirect costs (mainly  
10 productivity losses to society caused by the health problem or disease) and avoidable costs (those  
11 costs incurred for patients suffering complications, resulting from suboptimal medicines use, and  
12 patients with the same disease who experienced no complications). The indicators were grouped for  
13 analysis based on the original studies classification of the cost. All costs were converted to US  
14 dollars (2015 values) using the Cochrane Economics Methods Group - Evidence for Policy and  
15 Practice Information and Coordinating -Centre Cost Converter tool [18], allowing meaningful  
16 comparisons between nonadherence cost data. This online tool uses a two stage computation  
17 process to adjust estimates of costs for currency and/or price year utilizing a Gross Domestic Product  
18 deflator index and Purchasing Power Parities for Gross Domestic Product[18]. The PPP values given  
19 by the International Monetary Fund were chosen. If details of the original price year could not be  
20 ascertained from a study the mid-point year of the study period was used for calculations. The mean  
21 cost was calculated and reported where studies separated out costs for different confounding  
22 factors within the one outcome measure in a disease state. Annual costs were extrapolated from the  
23 original study data if results were not presented in this manner.  
24  
25  
26  
27  
28  
29  
30  
31  
32  
33

34 The definition of medication nonadherence was derived from the included studies; with  
35 nonadherence referring to differing degrees of adherence based on the studies metric of estimation.  
36 Multiple nonadherence costs from individual studies may have been included where further sub-  
37 classification of nonadherence levels was defined. The analysis assessed nonadherence costs within  
38 disease groups, with disease group and cost classification derived from the study. Total healthcare  
39 costs included direct costs to the healthcare system while total costs incorporated direct and indirect  
40 costs.  
41  
42  
43  
44  
45  
46  
47  
48

### 49 **2.3 Quality criteria and economic evaluation classification**

50  
51 Economic evaluation requires a comparison of two or more alternative courses of action, while  
52 considering both the inputs and outputs associated with each [19]. All studies were classified in  
53 accordance with Drummond's distinguishing characteristics of healthcare evaluations as either  
54 partial evaluations (outcome description, cost description, cost-outcome description, efficacy or  
55  
56  
57  
58  
59  
60

1  
2  
3 effectiveness evaluation, cost analysis) or full economic evaluations (cost benefit analysis, cost utility  
4 analysis, cost effectiveness analysis, cost minimization analysis) by team consensus (RC and VGC).  
5

6  
7 The Drummond checklist [20] for economic evaluation was used to assess the quality of studies. The  
8 original checklist was modified to remove inapplicable items (4, 5, 12, 14, 15, 30 and 31) as no full  
9 economic evaluation met all inclusion criteria. A score of 1 was assigned if the study included the  
10 required item and zero if it did not with a maximum potential score of 28. The study was classified as  
11 high quality if at least 75% of Drummond's criteria were satisfied, medium quality if 51-74% were  
12 satisfied and low quality if 50% of the criteria or less were satisfied.  
13  
14  
15

#### 16 17 18 19 **2.4 Meta-Analysis**

20  
21 Outcome/indicator costs were independently extracted utilising predesigned data extraction forms  
22 (total healthcare costs, total costs, inpatient costs, outpatient costs, pharmacy costs, medical costs,  
23 emergency department costs, and hospitalisation costs) for the purpose of integrating the findings  
24 on the cost of medication nonadherence to pool data and increase the power of analysis.  
25  
26  
27  
28  
29  
30  
31  
32  
33  
34  
35  
36  
37  
38  
39  
40  
41  
42  
43  
44  
45  
46  
47  
48  
49  
50  
51  
52  
53  
54  
55  
56  
57  
58  
59  
60

### 3 Results

#### 3.1 Study Selection

Search strategies retrieved 2692 potential articles after duplicates were removed. Two hundred and seventy four articles were selected for full text review. Seventy five studies were included in the review (Figure 1).

#### 3.2 Characteristics of individual studies

Sixty-two studies (82%) were conducted in the United States[11 21-81], four in Europe[82-85], four in Asia[86-89], three in Canada[90-92], one in the United Kingdom[93] and one across multiple countries throughout Europe and the United Kingdom[94]. Publication years ranged from 1997 to 2016. Individual studies reported a large variety of costs, calculated by varying means. Forty-two studies (56%) reported unadjusted costs[21 25 26 29 31-35 37-42 45 47-49 51-55 57 62-67 71 74 80 81 83-85 87-89 94], 19 (25%) adjusted costs[11 22-24 28 30 43 50 56 58-60 70 72 75-77 82 86], 11 a combination of adjusted and unadjusted[27 36 44 46 61 68 69 73 78 79 92], two unadjusted and predicted[90 91] and one predicted costs[93]. The method of determining nonadherence ranged significantly between studies with majority of papers utilizing pharmacy claims data (87%)[11 21-28 30-51 54 56 58-83 87-92]. Some studies utilized a combination of surveys or questionnaires, observational assessment, previous study data, disease state specific recommended guidelines and health claims data. Medication possession ratio (MPR) was the most utilized method to calculate patient nonadherence with 49 studies (65%) reporting nonadherence based on this measure[23 24 27 28 31-35 39-43 45 46 48-50 54 56 57 59-63 66-77 80-83 87-92]; however, the cut-off points to define medication nonadherence differed with some studies classifying nonadherence as less than 80% medication possession and others through sub-classification of percentage ranges (e.g., 0-20%, 20-40%, 40-60%, 60-80%, 80-100%). The proportion of days covered (PDC) was the next most common measure of nonadherence (9%)[30 36 44 47 51 78 79], with all other studies utilizing an array of measures including self-report[93], urine testing[55], observational assessment[94], time to discontinuation[58], cumulative possession ratio[22], disease specific medication management guidelines[65 84], Morisky 4-Item scale[52], medication gaps[37], prescription refill rates[21 26] and medication supplies[11]. The main characteristics of the included studies are summarised in eTable 2.

### 3.3 Quality assessment and classification of economic evaluations

The quality assessment of economic evaluations yielded 10 studies of high[32 36 39 49 50 56 70 74 82 88], 56 of medium[11 21-25 27-31 33-35 37 38 40-47 52-55 57 58 60-63 65 66 68 69 71 72 75-81 83 84 86 89-94] and nine of low quality[26 48 59 64 67 73 85 87]. Scores ranged from 26.1% to 87.5% (mean 62.9%). Only one study identified the form of economic evaluation used and justified it in relation to the questions that were being addressed [70]. The item 'the choice of discount rate is stated and justified' was applicable only to studies covering a time period of more than one year; all studies that cover more than one year failed to identify or explain why costs had not been discounted. Details of the analysis and interpretation of results were lacking in the majority of studies resulting in medium or low quality scores.

Through utilisation of Drummond's distinguishing characteristics of healthcare evaluations criteria[19] it is apparent that no full economic evaluation was conducted in any of the included studies. All studies performed partial economic evaluations of varying extents. The classification of economic evaluations resulted in 55 cost description studies (73% of those included), 15 cost outcome descriptions and five cost analysis studies (eTable 2).

### 3.4 Medication nonadherence and costs

The cost analysis of studies (figure 2 and figure 3) reported annual medication nonadherence costs incurred by the patient per year. The adjusted total cost of nonadherence across all disease groups ranged from \$949 to \$53,504, while the unadjusted total cost ranged from \$669 to \$162,699. Figure 2 and figure 3 highlight the minimum, maximum and interquartile range of annual costs incurred by patients across disease groups where three or more studies were included for review. All cause costs encompass nonadherence costs incurred in mixed disease state studies, taking into account other confounding factors such as comorbidities.

Many different indicators were used to estimate medication nonadherence costs with no clear definition of what was incorporated in each cost component. The composition of included costs to estimate total cost or total healthcare cost varied significantly between studies thus indicators were grouped for analysis based on the original studies classification of the cost. The main ones were total cost or total healthcare cost (83%), pharmacy costs (70%), outpatient costs (50%), inpatient costs (47%), medical costs (29%), emergency department costs (28%), and hospitalization costs (18%) (eTable 2). Avoidable costs (e.g., unnecessary hospitalisations, physician office visits and healthcare resource utilization) were not well defined with majority of studies failing to quantify these costs.

1  
2  
3 Lower levels of adherence across all measures (*e.g.*, MPR, PDC) were generally associated with  
4 higher total costs. From those that reported total or total healthcare costs, 37 studies (50%)  
5 reported nonadherence costs to be greater than adherence costs[23 24 26 28 30 31 33 36-38 41 42  
6 46 48 49 54 55 57 60-64 69-77 82 91-94] and 11 studies (15%) reported nonadherence costs to be  
7 less than adherence costs[22 25 35 43 58 62 65 80 87 89 90]. Four reported fluctuating findings  
8 based on varying nonadherence cost subcategories[32 47 66 88] and two studies reported  
9 conflicting findings between adjusted and unadjusted costs [78 79]. Sunyecz et al[67], Eisenberg et  
10 al[40] and Joe et al[86] reported all cause total nonadherence costs to be higher (\$28,395 vs.  
11 \$24,134, \$7,551 vs. \$7,051 and \$5,271 vs. \$4,375)) but disease group specific nonadherence costs to  
12 be lower (\$1923 vs. \$3273, \$703 vs. \$1012 and \$3,252 vs. \$4,151) whereas Hansen et al[46]  
13 reported all cause total nonadherence costs to be lower (\$18540 vs. \$52302) but disease group  
14 specific nonadherence total costs to be higher (\$3,879 vs. \$2,954).

15  
16  
17  
18  
19  
20  
21  
22 The association between nonadherence and cost was determined through use of a variety of scaling  
23 systems. The most utilized methods were MPR and PDC. These measures could then further be sub-  
24 categorized based on the percentage of adherence/nonadherence. The 80-100% category was  
25 classified as the most adherent group across both scales, with the most common definition of  
26 nonadherence being <80% MPR or PDC.  
27  
28  
29  
30  
31  
32  
33

### 34 **3.5 Cost of medication nonadherence via disease group**

35  
36 Cancer exhibited more than double the cost variation of all other disease groups (\$114,101).  
37 Osteoporosis (\$43,240 vs. \$42,734), diabetes mellitus (\$7,077 vs. \$6,808) and mental health  
38 (\$16,110 vs. \$23,408) cost variations were similar between adjusted and unadjusted costs while  
39 cardiovascular disease adjusted costs were more than double unadjusted costs (\$16,124 vs. \$6,943).  
40 Inpatient costs represented the greatest proportion of costs contributing to total costs and/or total  
41 healthcare costs for cardiovascular disease, diabetes mellitus, osteoporosis, mental health, epilepsy  
42 and parkinson's disease. HIV/AIDS, cancer and gastrointestinal disease groups highest proportion of  
43 costs were attributed to pharmacy costs while outpatient costs were greatest in musculoskeletal  
44 conditions. Direct costs had greater economic bearing than indirect costs across all disease groups.  
45  
46  
47  
48  
49

#### 50 **3.5.1 Cardiovascular Disease**

51  
52  
53 Twelve studies measured the economic impact of medication nonadherence in cardiovascular  
54 disease [11 23 30 60 61 64 66 75 80 88 90 91]. Six studies reported adjusted costs [11 23 30 60 61  
55 75] with annual costs being extrapolated for two of these[30 60]. Total healthcare costs and/or total  
56  
57  
58  
59  
60

1  
2  
3 costs were assessed in all of the studies with the major indicators measured including pharmacy  
4 costs[11 30 60 61 75], medical costs[11 23 30 60 75] and outpatient costs[30 61]. The annual  
5 economic cost of nonadherence ranged from \$3,347 to \$19,472. Sokol et al[11] evaluated the  
6 economic impact of medication nonadherence across three cardiovascular conditions; hypertension,  
7 hypercholesterolemia and chronic heart failure. For all three cardiovascular conditions examined,  
8 pharmacy costs were higher for the 80-100% adherent group than for the less adherent groups.  
9 Total costs and medical costs were lower for the adherent groups of hypertension and  
10 hypercholesterolemia patients. However, for chronic heart failure patients, total costs and medical  
11 costs were lower for the 1-19% and 20-39% adherent groups than for the 80-100% adherent groups.

12  
13  
14  
15  
16  
17  
18 Unadjusted costs were measured in six studies with the annual total healthcare costs and/or total  
19 costs of nonadherence ranging from \$1,433 to \$8,377 [64 66 80 88 90 91]. Rizzo et al[64] reported  
20 cost findings through subgroup analysis of five conditions. For all conditions the total healthcare  
21 costs were higher for nonadherent groups compared with adherent. While Zhao et al[80],  
22 categorized participants into adherence subgroups; finding that total healthcare costs were lower  
23 for the nonadherent population. The remaining studies used five key indicators to determine the  
24 economic impact: inpatient costs[66 88], outpatient costs[66 88], pharmacy costs[66 90 91], medical  
25 costs[90 91] and hospitalization costs[90 91].

### 31 **3.5.2 Mental Health**

32  
33 The analyses used to report the economic impact of medication nonadherence in mental health  
34 varied widely. Eleven of 14 studies provided a total nonadherence cost estimate in mental health[22  
35 24 26 51 58 65 72 81 86 93 94], with annual cost data being extrapolated for four of these[26 65 81  
36 94]. Six studies used adjusted costs, finding that the total annual cost of nonadherence per patient  
37 ranged from \$3,252 to \$19,363 [22 24 58 59 72 86]. Bagalman et al[24] focused primarily on the  
38 indirect costs associated with nonadherence – short-term disability, workers compensation and paid  
39 time off costs while Robertson et al[81] highlighted the association between medication  
40 nonadherence and incarceration, with findings indicating incarceration and arrest costs are higher  
41 for worsening degrees of nonadherence. All other studies addressed direct costs. The main  
42 indicators used to measure the direct economic impact of medication nonadherence were pharmacy  
43 costs[22 38 51 58 59 65 72 94], inpatient costs[38 59 65 93 94], outpatient costs[22 38 58 65 94] and  
44 hospitalization costs[21 22 58 94].

45  
46  
47  
48  
49  
50  
51  
52  
53 The total unadjusted cost for medication nonadherence ranged from \$2,512 to \$25,920 as reported  
54 in four studies [51 65 81 94]. Becker et al[26] used a subgroup analysis to classify patients based on  
55 their adherence level. For every 25% decrement in the rate of adherence (75-100%, 50-74%, 25-49%,  
56  
57

1  
2  
3 <25%), nonadherence total costs increased. The negligible adherence group (<25%) incurred annual  
4 costs that were \$3,018 more than those of the maximal adherence group (75-100%).  
5

6  
7 Knapp et al[93] outlined the predicted cost of nonadherence with reference to relative impact and  
8 other factors associated with resource use and costs in patients with schizophrenia. Total costs  
9 (\$116,434) were substantially higher than the other two indicators, which were inpatient costs  
10 (\$13,577) and external services costs (\$3,241).  
11  
12

### 13 14 **3.5.3 Diabetes mellitus:**

15  
16 Nine studies reported some cost measurement of the impact of medication nonadherence with  
17 reference to the health system and the individual[39 44 46 50 73 75 87 89 92]. One study estimated  
18 that the total US cost attributable to nonadherence in diabetes was slightly over \$5 billion[50]. Five  
19 studies reported the adjusted total healthcare costs and/or total costs with annual costs per patient  
20 ranging from \$2,741 to \$9,819 [46 50 73 75 92]. One study reported total costs in relation to  
21 subgroup analysis based on MPR level[73], and another reported total healthcare costs through  
22 subgroup analysis of commercially insured and Medicare supplemental patients[75].  
23  
24

25  
26 A further three studies reported unadjusted cost findings[39 87 89] and four studies reported  
27 unadjusted costs in addition to adjusted values[44 46 73 92]. Unadjusted total healthcare costs  
28 and/or total costs ranged from \$1,142 to \$7,951. Extrapolated annual costs were determined for  
29 two studies based on cost data presented [39 89].  
30  
31

32  
33 The most prominent indicators used to determine costs were pharmacy costs[39 44 46 73 75 92],  
34 outpatient costs[39 46 75 89 92], inpatient costs[46 75 92] and hospitalization costs[50 87 89]. All  
35 studies assessed the direct costs associated with medication nonadherence. One study evaluated  
36 the relationship between nonadherence and short term disability costs in addition to assessing  
37 direct costs[44].  
38  
39

### 40 41 42 43 **3.5.4 Osteoporosis:**

44  
45 The cost of medication nonadherence in relation to osteoporosis was predominately examined  
46 through analysis of the direct costs associated with nonadherence using total healthcare costs  
47 and/or total costs, inpatient costs, outpatient costs, pharmacy costs and emergency department  
48 costs. Two studies further assessed the economic impact of nonadherence through evaluation of  
49 fracture related costs [47 83]. Four out of 11 studies reported the adjusted cost of medication  
50 nonadherence in addition to reporting unadjusted costs [27 78 79 82]. Three studies further  
51 classified nonadherence through subgroup analysis, with Briesacher et al[27] using MPR 20% interval  
52  
53  
54  
55  
56  
57



1  
2  
3 increases and the two studies conducted by Zhao et al[78 79] using PDC, with  $\geq 80\%$  classified as high  
4 adherence, 50-79% medium adherence and  $< 50\%$  low adherence . In the studies conducted by Zhao  
5 et al[78 79], total healthcare costs were highest for the medium adherence group (\$41,402 and  
6 \$44,190) followed by the highest adherence group (\$37,553 and \$43,863), and lowest for the low  
7 adherence group (\$34,019 and \$43,771). These annual costs were extrapolated from study data. In  
8 contrast, Briesacher et al[27] modelled the subgroup analyses against the lowest adherence group  
9 ( $< 20\%$  MPR), finding that costs decreased as adherence increased.  
10  
11  
12  
13

14 Overall, the unadjusted total healthcare costs and/or total costs of nonadherence ranged from \$669  
15 to \$43,404. Studies that further classified patients based on subgroups had the wider cost ranges. In  
16 the three studies that reported the lowest level of nonadherence to be PDC  $< 50\%$ , the cost of this  
17 category ranged from \$16,938 to \$43,404 [47 78 79].  
18  
19  
20  
21

22 One study examined only the medical costs of nonadherence through MPR subgroup analysis in  
23 commercial and Medicare supplemental populations. The findings were that, for all levels of  
24 nonadherence, costs of nonadherence were higher for Medicare supplemental patients [45].  
25  
26

### 27 **3.5.5 Respiratory Disease:**

28  
29 All five studies reported the unadjusted cost of medication nonadherence. The methods of  
30 classifying adherence levels varied greatly among them[35 37 52 63 84]. Two studies used MPR[35  
31 63], one the Morisky 4-Item scale[52], one the Global Initiative for Chronic Obstructive Lung Disease  
32 (GOLD) 2007 Guidelines[84] and one a 37 day gap in claims data[37]. Joshi et al[52] reported on the  
33 indirect costs of medication nonadherence through consideration of losses in total productivity  
34 costs, absenteeism costs and presenteeism costs, while all remaining studies examined direct costs.  
35 Delea et al[35] reported a direct relationship between decreases in medication nonadherence level  
36 and total costs, whereas Quittner et al[63] reported an inverse relationship between decreases in  
37 medication nonadherence level and total healthcare cost. The total expenses associated with the  
38 lowest subgroup of adherence across all measures ranged from \$804 to \$36,259.  
39  
40  
41  
42  
43  
44  
45

### 46 **3.5.6 Gastrointestinal Disease:**

47  
48 Three of five studies reported the adjusted annual cost of medication nonadherence per patient  
49 utilizing the MPR method [43 56 70]. Of these, two reported the total cost (\$12,085 and \$37,151)[43  
50 70] with the main contributors to the overall total cost being inpatient costs (22% and 37%),  
51 outpatient costs (57% and 17%) and pharmacy costs (20% and 45%).  
52  
53  
54  
55  
56  
57  
58  
59  
60

1  
2  
3 The remaining two studies utilized infusion rates to assess nonadherence with neither reporting the  
4 total cost nor total healthcare costs[29 53]. Carter et al[29] reported hospitalization costs to be  
5 \$42,854 while Kane et al[53] reported a significantly lower cost at \$5,566 in addition to other direct  
6 cost contributors.  
7  
8

### 9 10 **3.5.7 Epilepsy:**

11  
12 Three studies reported the economic impact of medication nonadherence in epilepsy. They all  
13 reported unadjusted costs using an MPR cut off of <80%[34 41 42]. The main economic indicators  
14 used to assess total costs were inpatient costs (\$2,289 to \$6,874), emergency department visit costs  
15 (\$331 to \$669) and pharmacy costs (\$442 to \$1,067). Davis et al[34] modelled the costs of the  
16 nonadherent group against the adherent group. The annual costs reported by Faught et al[42] were  
17 extrapolated from original cost data. The total cost of nonadherence in epilepsy ranged from \$1,866  
18 to \$22,673.  
19  
20  
21  
22

### 23 24 **3.5.8 HIV/AIDS:**

25  
26 The economic impact of medication nonadherence for HIV and AIDS patients reported amongst all  
27 three studies was similar [25 31 62]. Two of the three studies examined the costs only for HIV[25  
28 31], while Pruitt et al[62] assessed the cost in AIDS as well as HIV. The total unadjusted costs for  
29 nonadherent HIV patients ranged from \$16,957 to \$30,068 with one study further categorizing  
30 patients with HIV as having either a high viral load or low viral load[25]. The total cost of  
31 nonadherence in AIDS was \$30,523[62]. All studies used comparable indicators (total cost, inpatient  
32 cost, outpatient cost, pharmacy cost) to determine the cost of nonadherence.  
33  
34  
35  
36  
37

### 38 39 **3.5.9 Parkinson's Disease:**

40  
41 The direct costs associated with Parkinson's disease were assessed in all three studies. The  
42 unadjusted total cost ranged from \$10,988 to \$52,023 [33 36 71]. Wei et al[71] further sub-grouped  
43 patients into MPR adherence percentage categories, and found that costs increased on all economic  
44 indicators (inpatient costs and outpatient costs) as adherence decreased, except for pharmacy costs  
45 which decreased with nonadherence. One study additionally reported the adjusted cost, estimating  
46 that \$10,290 could be attributed to medication nonadherence annually[36].  
47  
48  
49

### 50 51 **3.5.10 Musculoskeletal Conditions:**

52  
53 Differing subgroup analyses was used to measure the impact of medication nonadherence on the  
54 annual cost incurred by patients. One study assessed both the direct and indirect costs of  
55 nonadherence[49], one assessed only the medical costs[68] and one examined the direct costs in  
56  
57  
58  
59

1  
2  
3 commercial and Medicare supplemental patient populations[77]. Zhao et al[77] reported the  
4 adjusted annual cost in the commercial population to be \$22,609, and in the Medicare supplemental  
5 group, \$28,126. Ivanova et al[49] reported only unadjusted costs and the annual total cost of  
6 \$3,408. This figure was extrapolated from study data provided. The main indicators used to evaluate  
7 the economic impact of nonadherence were inpatient costs, outpatient costs, pharmacy costs and  
8 medical costs. Outpatient costs made the largest contribution to the overall total.  
9  
10  
11

### 12 **3.5.11 Cancer:**

13  
14  
15 Two studies evaluated the effects of medication nonadherence in cancer[32 74]. One study reported  
16 total annual costs of \$119,416[74], while the other gave a subgroup analysis based on classified  
17 adherence levels[32]. In general the lowest two adherence subgroups (<50% and 50-90%) reported  
18 the highest total healthcare costs (\$162,699 and \$67,838). This trend followed for inpatient costs,  
19 outpatient costs and other costs, but the reverse relationship was found for pharmacy costs.  
20  
21  
22  
23

### 24 **3.5.12 Addiction:**

25  
26 The adjusted annual total healthcare cost of medication nonadherence was reported as \$53,504[55]  
27 while the unadjusted cost ranged from \$29,406 to \$52,213 [55 69]. Leider et al[55] reported the  
28 main contributors to this cost to be outpatient costs (\$10,829) and pharmacy costs (\$8,855),  
29 whereas Tkacz et al[69] reported them to be inpatient costs (\$28,873 and \$28,407) and outpatient  
30 costs (\$15,893 and \$15,460).  
31  
32  
33  
34

### 35 **3.5.13 Metabolic conditions other than diabetes mellitus:**

36  
37 One study measured the influence of medication nonadherence on direct healthcare costs in  
38 metabolic conditions, reporting an unadjusted attributable total cost of \$138,525[54]. The economic  
39 indicators used to derive this cost were inpatient costs (\$16,192), outpatient costs (\$111,100),  
40 emergency department visit costs (\$801) and pharmacy costs (\$3,538).  
41  
42  
43  
44

### 45 **3.5.14 Blood conditions:**

46  
47 Only Candrilli et al[28] reported cost findings on the relationship between nonadherence and  
48 healthcare costs, giving an adjusted total cost estimate of \$13,458 for nonadherence classified as  
49 MPR <80%.  
50  
51

### 52 **3.5.15 All causes:**

53  
54 In addition to disease-specific studies of the economic impact of medication nonadherence, 28  
55 studies reported the all-causes costs, encompassing cost drivers such as comorbidities. In seven of  
56  
57  
58  
59

1  
2  
3 these studies, annual costs were extrapolated from the original data[30 46 49 60 63 65 94]. Ten  
4 studies reported on economic indicators without giving total cost or total healthcare cost[21 44 45  
5 53 54 56 59 80 85 94], and one study reported on costs per episode of nonadherence[85] .  
6  
7

8 The adjusted cost of medication nonadherence was reported in 10 studies with an estimated range  
9 of \$7,808 to \$52,341 [11 28 30 36 46 58 60 70 75 76]. Sokol et al[11] reported the all-cause cost of  
10 nonadherence through subgroup analysis of disease states and MPR levels, while Pittman et al[60]  
11 reported only using MPR level breakdown.  
12  
13

14  
15 Fourteen studies reported the unadjusted economic impact of medication nonadherence with an  
16 estimated range of \$1,037 to \$53,793 [21 40 45 49 53 54 57 63-65 67 80 85 94]. A further four  
17 studies reported adjusted and unadjusted costs[36 44 46 92]. The most frequent indicators used to  
18 measure the economic impact were total healthcare costs and/or total costs (71%), pharmacy costs  
19 (75%), inpatient costs (46%), outpatient costs (46%), medical costs (28%) and emergency  
20 department visit costs (25%).  
21  
22  
23  
24  
25  
26  
27

### 28 **3.6 Meta-Analysis**

29  
30 Statistical analysis was attempted to collate the large collection of results from individual studies for  
31 the purpose of integrating the findings on the cost of medication nonadherence. However, the  
32 criterion for a meta-analysis could not be met due to the heterogeneity in study design and lack of  
33 required statistical parameters in particular standard deviation[95]. Combining studies that differ  
34 substantially in design and other factors would have yielded meaningless summary results.  
35  
36  
37  
38  
39  
40  
41  
42  
43  
44  
45  
46  
47  
48  
49  
50  
51  
52  
53  
54  
55  
56  
57  
58  
59  
60

#### 4 Discussion

This systemic review broadens the scope of knowledge associated with the economic impact of medication nonadherence across different disease groups while building upon previous reviews where greater focus was on targeting overall risk factors or conceptual issues associated with medication nonadherence. Medication nonadherence was generally associated with higher healthcare costs. A large variety of outcomes were used to measure the economic impact including total cost or total healthcare cost, pharmacy costs, inpatient costs, outpatient costs, Emergency department costs, medical costs and hospitalization costs.

The costs reported reflect the annual economic impact to the health system per patient. None of the studies estimated broader economic implications such as avoidable costs arising from higher disease prevalence with studies failing to quantify avoidable costs separately to direct and indirect costs possibly due to coding restraints in healthcare claims databases. The majority of studies took the patient or healthcare provider perspective, estimating additional costs associated with nonadherence when compared with adherence. Current literature identifies and quantifies key disease groups that contribute to the economic burden of nonadherence, but no research has attempted to synthesise costs across disease states within major healthcare systems. Comparisons across disease groups would benefit the development of health planning and policy yet prove problematic to interpret due to the varying scope of their inclusion (e.g., mental health vs. parkinsons disease). Similarly there is substantial variation in the differential cost of adherence amongst disease groups with certain diseases requiring greater cost inputs (e.g., cancer and supportive care costs). Further exploration of nonadherence behavior and associated costs is required to adequately quantify the overall cost of nonadherence to healthcare systems as the available data are subject to considerable uncertainty. Given the complexity of medication nonadherence in terms of varying study designs, methods of estimation and adherence definitions there is a limitation as to the ability to truly estimate costs attributed to nonadherence until further streamlined processes are defined.

Significant differences existed in the range of costs reported within and amongst disease groups. No consistent approach to the estimation of costs or levels of adherence has been established. Many different cost indicators were used, with few studies defining exactly what that cost category incorporated, so it is not surprising that cost estimates spanned wide ranges. Prioritization of healthcare interventions to address medication nonadherence is required to address the varying economic impact across disease groups. Determining the range of costs associated with medication nonadherence facilitates the extrapolation of annual national cost estimates attributable to

1  
2  
3 medication nonadherence thus enabling greater planning in terms of health policy to help  
4 counteract costs.  
5

6  
7 The economic, clinical and humanistic consequences of medication nonadherence will continue to  
8 grow as the burden of chronic diseases grows worldwide. Evolution of health systems must occur to  
9 adequately address the determinants of adherence through utilization of effective health  
10 interventions. Haynes et al [96] highlights that “increasing the effectiveness of adherence  
11 interventions may have a far greater impact on the health of the population than any improvement  
12 in specific medical treatments”. Improving medication adherence provides an opportunity for major  
13 cost savings to healthcare systems. Moving forward health policy needs to recognize the link  
14 between adherence and health system efficacy and the opportunity it presents to allocate health  
15 budget spending more appropriately. Predictions of population health outcomes through utilization  
16 of treatment efficacy data need to be used in conjunction with adherence rates to inform planning  
17 and project evaluation[5]. The correlation between increased nonadherence and higher disease  
18 prevalence should be used to inform policy makers to help circumvent avoidable costs to the  
19 healthcare system.  
20  
21  
22  
23  
24  
25  
26  
27

28 The metric of adherence estimation varied substantially within and across disease groups; likely  
29 affecting the comparisons between studies. However, Hess et al [97], who compared six key  
30 adherence measures on the same study participants, found that the measures produced similar  
31 adherence values for all participants, although PDC and continuous measure of medication gaps  
32 produced slightly lower values. While this highlights the comparability of the measures of  
33 medication nonadherence, it further justifies the need to agree on consistent methods for  
34 estimating nonadherence through use of pharmacy claims data.  
35  
36  
37  
38  
39

40 MPR was the most commonly used measure to estimate medication nonadherence. MPR was used  
41 in 65% of studies, followed by PDC, which was used in 9%. These percentages were consistent with  
42 those found recently by Sattler et al [98]. Even though the measures of medication nonadherence  
43 may be comparable, the definition of MPR and the cut-off points to define nonadherence differed  
44 significantly. Dragomir et al[90] defined MPR as the total days' supply of medication dispensed in the  
45 period, divided by the follow up period, with the assumption of 100% adherence during  
46 hospitalization; Wu et al[75] removed the number of hospitalized days from the calculation; and  
47 Pittman et al[60] calculated the total number of days between the dates of the last filling of a  
48 prescription in the first six months in a given year and the first filling of a prescription in the 365 days  
49 before the last filling. Nonadherence could also be further classified into subcategories within MPR  
50 and PDC based on percentages. Twenty-eight studies defined nonadherence as  $MPR < 80\%$ , and 19  
51  
52  
53  
54  
55  
56  
57  
58  
59  
60

1  
2  
3 studies categorized nonadherence into varying percentage subgroups. While Karve et al[99]  
4 validated the empirical basis for selecting 80% as a reasonable cut-off point based on predicting  
5 subsequent hospitalizations in patients across a broad array of chronic diseases, 72 of the 75 studies  
6 included in this review examined more than just hospitalization costs as an indicator metric. Further  
7 research is required to identify and standardise nonadherence thresholds using other outcomes such  
8 as laboratory, productivity and pharmacy measures.  
9  
10

11  
12  
13 Within the 75 studies covered, 34 different indicators were used to measure the cost of  
14 nonadherence and 19 reporting styles were identified. Because of the resultant heterogeneity, a  
15 meta-analysis was impossible. It is imperative that a standardized approach be established to  
16 measure and report the economic impact of medication nonadherence. The core outcome set must  
17 take into consideration the perspective of the intended audience and the proportion of  
18 nonadherence cost that is attributable to each outcome to determine an appropriate model[100].  
19 The critical indicators based on the findings of this review include total costs, pharmacy costs,  
20 inpatient costs, outpatient costs, emergency department visit costs, medical costs and  
21 hospitalization costs for analysis based on direct costs. For indirect analysis the core outcomes  
22 include short term disability costs, workers compensation costs, paid time off costs, absenteeism  
23 costs and productivity costs. We suggest that further analysis of the contribution of each outcome to  
24 the overall cost of nonadherence be undertaken to help develop a tool that can be utilized for future  
25 research.  
26  
27  
28  
29  
30  
31  
32  
33

34 Many studies have examined the relationship between nonadherence and economic outcomes using  
35 a cross-sectional analysis[50]. The implications of this are that potentially crucial confounders such  
36 as baseline status are ignored. In addition, a cross-sectional analysis may obscure temporality: for  
37 example, did greater adherence result in reduced costs and improved health outcomes, or was the  
38 patient healthier initially and more capable of being adherent? A longitudinal design is needed to  
39 overcome this limitation.  
40  
41  
42  
43

44 None of the studies included a full economic evaluation. An economic evaluation requires a  
45 comparison of two or more alternative courses of action, while considering both the inputs and  
46 outputs associated with each[19]. While none of the studies taken separately could inform a choice  
47 between alternative courses of action, they did provide key evidence for decision makers about  
48 costs associated with medication nonadherence. Pharmacy claims data were utilized by the majority  
49 of studies to model cost estimates. Three-quarters of the studies were classified as cost  
50 descriptions, providing a cost or outcome overview of the health consequences associated with  
51 nonadherence. Ten studies garnered a high quality classification, potentially limiting the overall  
52  
53  
54  
55  
56  
57  
58  
59

1  
2  
3 conclusions that are able to be drawn and emphasised the need for future study design to  
4 incorporate elements allowing full economic evaluations to be conducted. Hughes et al[101]  
5 highlighted the need for more information on the consequences of nonadherence, so that economic  
6 evaluations could reflect the potential long-term effect of this growing problem.  
7  
8

9  
10 Of the seventy five included studies, sixty two of the studies were conducted in the United States.  
11 Conversion of costs to a common currency (US dollars) facilitated the comparison of studies and  
12 disease states. Comparison of costs between healthcare systems is difficult as no two are the same  
13 and as healthcare is generally more expensive in the United States cost estimates may not reflect  
14 average values. Thus caution needs to be taken when interpreting results however findings help to  
15 represent the significance of the economic burden medication nonadherence plays. Analysis of  
16 studies not conducted in the United States support the finding that generally medication  
17 nonadherence incurs greater costs for all cost indicator outcomes other than pharmacy costs.  
18  
19  
20  
21  
22

23 Due to the advances in technology available to record and assess medication nonadherence, the  
24 inclusion of studies undertaken in the late 1990s and early 2000s may have affected the  
25 comparability of results, despite the fact that these studies met the inclusion criteria[21 22 64 72 73  
26 93]. The quality of data presents a limitation. Information on disease groups with fewer included  
27 studies may be less reliable than information on those with more. However, our findings affirm the  
28 pattern of association between nonadherence and increasing healthcare costs.  
29  
30  
31  
32  
33  
34  
35  
36  
37  
38  
39  
40  
41  
42  
43  
44  
45  
46  
47  
48  
49  
50  
51  
52  
53  
54  
55  
56  
57  
58  
59  
60



## 5 Conclusion

Medication nonadherence places a significant cost burden on healthcare systems. However differences in methodological strategies make the comparison amongst studies challenging and reduce the ability for the true economic magnitude of the problem to be expressed in a meaningful manner. Further research is required to develop a streamlined approach to classify patient adherence. An economic model that adequately depicts the current landscape of the nonadherence problem using key economic indicators could help to stratify costs and inform key policy and decision makers. Utilisation of existing data could help to better define costs and provide valuable input into the development of an economic model to standardise the economic impact of medication nonadherence.

## 6 Footnotes

**Contributors:** RC, VGC, SB, FFL and MF conceived the paper. RC and VGC performed all the data extraction and quality assessment. RC drafted the initial form and all revisions of this manuscript. All other authors (RC, VGC, SB, FFL, MF) made significant contributions to the manuscript and read and modified the drafts. All authors read and approved the final manuscript.

**Funding:** This research received no specific grant from any funding agency in the public, commercial or not-for-profit sectors.

**Competing interests:** None declared

**Data sharing statement:** All data from systematic review available in paper and supplementary material.

**Acknowledgement:** RC research is supported by an Australian Government Research Training Program Scholarship.

1. Centres for Disease Control and Prevention. Chronic Disease Prevention and Health Promotion. Available from: <http://www.cdc.gov/chronicdisease/overview> Accessed June 24, 2016
2. World Health Organisation, National Institute of Aging, National Institute of Health and US Department of Health and Human Services. Global Health and Ageing. Published October 2011. . Available from: [http://www.who.int/ageing/publications/global\\_health.pdf](http://www.who.int/ageing/publications/global_health.pdf) Accessed June 24, 2016
3. Congressional Budget Office . Offsetting effects of prescription drug use on medicare’s spending for medical services. Congressional Budget Office Report. Published November 2012. Available from: <http://www.cbo.gov/sites/default/files/cbofiles/attachments/43741-MedicalOffsets-11-29-12.pdf>. Accessed Aug 10, 2017
4. Horne R WJ, Barber N, Elliot R, Morgan M. Concordance, adherence and compliance in medicine taking. Report for the National Coordinating Centre for NHS Service Delivery and Organization R & D (NCCSDO). 2005
5. World Health Organisation. Adherence to Long Term Therapies; Evidence for Action. Published 2003. . Available from: [http://www.who.int/chp/knowledge/publications/adherence\\_full\\_report.pdf?ua=1](http://www.who.int/chp/knowledge/publications/adherence_full_report.pdf?ua=1). Accessed November 6, 2015.
6. New England Healthcare Institute. Thinking outside the pillbox: a system-wide approach to improving patient medication adherence for chronic disease. Published August 2009. . Available from: [http://www.nehi.net/publications/44/thinking\\_outside\\_the\\_pillbox\\_a\\_systemwide\\_approach\\_to\\_improving\\_patient\\_medication\\_adherence\\_for\\_chronic\\_disease](http://www.nehi.net/publications/44/thinking_outside_the_pillbox_a_systemwide_approach_to_improving_patient_medication_adherence_for_chronic_disease). Accessed June 24, 2016.
7. Pharmaceutical Group of the European Union. Targeting adherence. Improving patient outcomes in Europe through community pharmacists’ intervention. Published May 2008. Available from: <http://www.pgeu.eu/policy/5-adherence.html>. Accessed January 28, 2016. .
8. IMS Institute for Healthcare Informatics. Advancing the responsible use of medicines; applying levers for change. Published October 2012. Available from: <http://pharmanalyses.fr/wp-content/uploads/2012/10/Advancing-Responsible-Use-of-Meds-Report-01-10-12.pdf>. Accessed March 10, 2016. .
9. AIHW 2016. Health expenditure Australia 2014–15. Health and welfare expenditure series no. 57. Cat. no. HWE 67. Canberra: AIHW. .
10. Australian Department of Health and Ageing. PriceWaterhouseCoopers. Evaluation of the DAA/PMP Programs. Published June 2010. Available from: [https://www.health.gov.au/internet/main/publishing.nsf/Content/F520A0D5EDEA0172CA257BF0001D7B4D/\\$File/DAA%20PMP%20Report.pdf](https://www.health.gov.au/internet/main/publishing.nsf/Content/F520A0D5EDEA0172CA257BF0001D7B4D/$File/DAA%20PMP%20Report.pdf) Accessed June 24, 2016.
11. Sokol MC, McGuigan KA, Verbrugge RR, et al. Impact of medication adherence on hospitalization risk and healthcare cost. *Medical care* 2005;**43**:521-30
12. Vermiere E, Avonts D, Van Royen P, et al. Context and health outcomes. *Lancet* (London, England) 2001;**357**(9273):2059-60
13. American Pharmacists Association/APhA AP . Medication Compliance-Adherence-Persistence (CAP) Digest. Washington DC. American Pharmacists Association and Pfizer Pharmaceuticals; 2003.
14. Egede LE, Gebregziabher M, Dismuke CE, et al. Medication nonadherence in diabetes: longitudinal effects on costs and potential cost savings from improvement. *Diabetes care* 2012;**35**(12):2533-9 doi: 10.2337/dc12-0572[published Online First: Epub Date]].
15. Bach PB. New Math on Drug Cost-Effectiveness. *The New England journal of medicine* 2015;**373**(19):1797-9 doi: 10.1056/NEJMp1512750[published Online First: Epub Date]].
16. Moher D, Liberati A, Tetzlaff J, et al. Preferred reporting items for systematic reviews and meta-analyses: the PRISMA statement. *Annals of internal medicine* 2009;**151**(4):264-9, w64

17. Higgins JPT, Green S (editors). *Cochrane Handbook for Systematic Reviews of Interventions* Version 5.1.0 [updated March 2011]. The Cochrane Collaboration, 2011.
18. Shemilt I, Thomas J, Morciano M. A web-based tool for adjusting costs to a specific target currency and price year. *Evidence & Policy: A Journal of Research, Debate and Practice* 2010;**6**(1):51-59
19. Drummond MF, Sculpher MJ, Claxton K, et al. *Methods for the economic evaluation of health care programmes*: Oxford university press, 2015.
20. Drummond MF, Jefferson TO. Guidelines for authors and peer reviewers of economic submissions to the BMJ. The BMJ Economic Evaluation Working Party. *Bmj* 1996;**313**(7052):275-83
21. Svarstad BL, Shireman TI, Sweeney JK. Using drug claims data to assess the relationship of medication adherence with hospitalization and costs. *Psychiatric services (Washington, DC)* 2001;**52**:805-11
22. Gilmer TP, Dolder CR, Lacro JP, et al. Adherence to treatment with antipsychotic medication and health care costs among Medicaid beneficiaries with schizophrenia. *The American journal of psychiatry* 2004;**161**:692-9
23. Aubert RE, Yao J, Xia F, et al. Is there a relationship between early statin compliance and a reduction in healthcare utilization? *The American journal of managed care* 2010;**16**:459-66
24. Bagalman E, Yu-Isenberg KS, Durden E, et al. Indirect costs associated with nonadherence to treatment for bipolar disorder. *Journal of occupational and environmental medicine / American College of Occupational and Environmental Medicine* 2010;**52**:478-85 doi: 10.1097/JOM.0b013e3181db811d[published Online First: Epub Date]].
25. Barnett PG, Chow A, Joyce VR, et al. Determinants of the Cost of Health Services Used by Veterans With HIV. *Medical care* 2011;**49**:848-56 doi: 10.1097/MLR.0b013e31821b34c0[published Online First: Epub Date]].
26. Becker MA, Young MS, Ochshorn E, et al. The relationship of antipsychotic medication class and adherence with treatment outcomes and costs for Florida Medicaid beneficiaries with schizophrenia. *Administration and policy in mental health* 2007;**34**:307-14 doi: 10.1007/s10488-006-0108-5[published Online First: Epub Date]].
27. Briesacher BA, Andrade SE, Yood RA, et al. Consequences of poor compliance with bisphosphonates. *Bone* 2007;**41**:882-7 doi: 10.1016/j.bone.2007.07.009[published Online First: Epub Date]].
28. Candrilli SD, O'Brien SH, Ware RE, et al. Hydroxyurea adherence and associated outcomes among Medicaid enrollees with sickle cell disease. *American journal of hematology* 2011;**86**:273-7 doi: 10.1002/ajh.21968[published Online First: Epub Date]].
29. Carter CT, Waters HC, Smith DB. Impact of infliximab adherence on Crohn's disease-related healthcare utilization and inpatient costs. *Advances in therapy* 2011;**28**:671-83 doi: 10.1007/s12325-011-0048-7[published Online First: Epub Date]].
30. Casciano JP, Dotiwala ZJ, Martin BC, et al. The costs of warfarin underuse and nonadherence in patients with atrial fibrillation: a commercial insurer perspective. *Journal of managed care pharmacy : JMCP* 2013;**19**:302-16
31. Cooke CE, Lee HY, Xing S. Adherence to antiretroviral therapy in managed care members in the United States: a retrospective claims analysis. *Journal of managed care pharmacy : JMCP* 2014;**20**:86-92
32. Darkow T, Henk HJ, Thomas SK, et al. Treatment interruptions and non-adherence with imatinib and associated healthcare costs: a retrospective analysis among managed care patients with chronic myelogenous leukaemia. *PharmacoEconomics* 2007;**25**:481-96
33. Davis KL, Edin HM, Allen JK. Prevalence and cost of medication nonadherence in Parkinson's disease: evidence from administrative claims data. *Movement disorders : official journal of the Movement Disorder Society* 2010;**25**(4):474-80 doi: 10.1002/mds.22999[published Online First: Epub Date]].

- 1
- 2
- 3 34. Davis KLC, S. D.; Edin, H. M. Prevalence and cost of nonadherence with antiepileptic drugs in an
- 4 adult managed care population. *Epilepsia* 2008;**49**(3):446-54 doi: 10.1111/j.1528-
- 5 1167.2007.01414.x[published Online First: Epub Date]].
- 6 35. Delea TE, Stanford RH, Hagiwara M, et al. Association between adherence with fixed dose
- 7 combination fluticasone propionate/salmeterol on asthma outcomes and costs\*. *Current*
- 8 *medical research and opinion* 2008;**24**:3435-42 doi: 10.1185/03007990802557344[published
- 9 Online First: Epub Date]].
- 10 36. Delea TE, Thomas SK, Hagiwara M. The association between adherence to
- 11 levodopa/carbidopa/entacapone therapy and healthcare utilization and costs among
- 12 patients with Parkinson's disease: a retrospective claims-based analysis. *CNS drugs*
- 13 2011;**25**:53-66 doi: 10.2165/11538970-000000000-00000[published Online First: Epub
- 14 Date]].
- 15 37. Diehl JL, Daw JR, Coley KC, et al. Medical utilization associated with palivizumab compliance in a
- 16 commercial and managed medicaid health plan. *Journal of managed care pharmacy : JMCP*
- 17 2010;**16**:23-31
- 18 38. Eaddy M, Grogg A, Locklear J. Assessment of compliance with antipsychotic treatment and
- 19 resource utilization in a Medicaid population. *Clinical therapeutics* 2005;**27**:263-72 doi:
- 20 10.1016/j.clinthera.2005.02.003[published Online First: Epub Date]].
- 21 39. Egede LE, Gebregziabher M, Dismuke CE, et al. Medication Nonadherence in Diabetes:
- 22 Longitudinal effects on costs and potential cost savings from improvement. *Diabetes care*
- 23 2012;**35**:2533-39 doi: 10.2337/dc12-0572[published Online First: Epub Date]].
- 24 40. Eisenberg DF, Placzek H, Gu T, et al. Cost and consequences of noncompliance to oral
- 25 bisphosphonate treatment. *Journal of managed care & specialty pharmacy* 2015;**21**(1):56-65
- 26 doi: 10.18553/jmcp.2015.21.1.56[published Online First: Epub Date]].
- 27 41. Ettinger AB, Manjunath R, Candrilli SD, et al. Prevalence and cost of nonadherence to
- 28 antiepileptic drugs in elderly patients with epilepsy. *Epilepsy & behavior : E&B* 2009;**14**:324-
- 29 9 doi: 10.1016/j.yebeh.2008.10.021[published Online First: Epub Date]].
- 30 42. Faight RE, Weiner JR, Guérin A, et al. Impact of nonadherence to antiepileptic drugs on health
- 31 care utilization and costs: findings from the RANSOM study. *Epilepsia* 2009;**50**:501-9 doi:
- 32 10.1111/j.1528-1167.2008.01794.x[published Online First: Epub Date]].
- 33 43. Gosselin A, Luo R, Lohoues H, et al. The impact of proton pump inhibitor compliance on health-
- 34 care resource utilization and costs in patients with gastroesophageal reflux disease. *Value in*
- 35 *health : the journal of the International Society for Pharmacoeconomics and Outcomes*
- 36 *Research* 2009;**12**:34-9 doi: 10.1111/j.1524-4733.2008.00399.x[published Online First: Epub
- 37 Date]].
- 38 44. Hagen SE, Wright DW, Finch R, et al. Impact of compliance to oral hypoglycemic agents on short-
- 39 term disability costs in an employer population. *Population health management* 2014;**17**:35-
- 40 41 doi: 10.1089/pop.2013.0009[published Online First: Epub Date]].
- 41 45. Halpern R, Becker L, Iqbal SU, et al. The association of adherence to osteoporosis therapies with
- 42 fracture, all-cause medical costs, and all-cause hospitalizations: a retrospective claims
- 43 analysis of female health plan enrollees with osteoporosis. *Journal of managed care*
- 44 *pharmacy : JMCP* 2011;**17**:25-39
- 45 46. Hansen RA, Farley JF, Droege M, et al. A retrospective cohort study of economic outcomes and
- 46 adherence to monotherapy with metformin, pioglitazone, or a sulfonylurea among patients
- 47 with type 2 diabetes mellitus in the United States from 2003 to 2005. *Clinical therapeutics*
- 48 2010;**32**:1308-19 doi: 10.1016/j.clinthera.2010.07.011[published Online First: Epub Date]].
- 49 47. Hazel-Fernandez L, Louder AM, Foster SA, et al. Association of teriparatide adherence and
- 50 persistence with clinical and economic outcomes in Medicare Part D recipients: a
- 51 retrospective cohort study. *BMC musculoskeletal disorders* 2013;**14**:4 doi: 10.1186/1471-
- 52 2474-14-4[published Online First: Epub Date]].
- 53
- 54
- 55
- 56
- 57
- 58
- 59
- 60

- 1
- 2
- 3 48. Huybrechts KF, Ishak KJ, Caro JJ. Assessment of compliance with osteoporosis treatment and its
- 4 consequences in a managed care population. *Bone* 2006;**38**:922-8 doi:
- 5 10.1016/j.bone.2005.10.022[published Online First: Epub Date]].
- 6 49. Ivanova JI, Bergman RE, Birnbaum HG, et al. Impact of medication adherence to disease-
- 7 modifying drugs on severe relapse, and direct and indirect costs among employees with
- 8 multiple sclerosis in the US. *Journal of medical economics* 2012;**15**:601-9 doi:
- 9 10.3111/13696998.2012.667027[published Online First: Epub Date]].
- 10 50. Jha AK, Aubert RE, Yao J, et al. Greater adherence to diabetes drugs is linked to less hospital use
- 11 and could save nearly \$5 billion annually. *Health affairs (Project Hope)* 2012;**31**:1836-46 doi:
- 12 10.1377/hlthaff.2011.1198[published Online First: Epub Date]].
- 13 51. Jiang Y, Ni W. Estimating the Impact of Adherence to and Persistence with Atypical Antipsychotic
- 14 Therapy on Health Care Costs and Risk of Hospitalization. *Pharmacotherapy* 2015;**35**(9):813-
- 15 22 doi: 10.1002/phar.1634[published Online First: Epub Date]].
- 16 52. Joshi AV, Madhavan SS, Ambegaonkar A, et al. Association of medication adherence with
- 17 workplace productivity and health-related quality of life in patients with asthma. *The Journal*
- 18 *of asthma : official journal of the Association for the Care of Asthma* 2006;**43**:521-6 doi:
- 19 10.1080/02770900600857010[published Online First: Epub Date]].
- 20 53. Kane SV, Chao J, Mulani PM. Adherence to infliximab maintenance therapy and health care
- 21 utilization and costs by Crohn's disease patients. *Advances in therapy* 2009;**26**:936-46 doi:
- 22 10.1007/s12325-009-0069-7[published Online First: Epub Date]].
- 23 54. Lee A, Song X, Khan I, et al. Association of cinacalcet adherence and costs in patients on dialysis.
- 24 *Journal of medical economics* 2011;**14**:798-804 doi:
- 25 10.3111/13696998.2011.627404[published Online First: Epub Date]].
- 26 55. Leider HL, Dhaliwal J, Davis EJ, et al. Healthcare costs and nonadherence among chronic opioid
- 27 users. *The American journal of managed care* 2011;**17**:32-40
- 28 56. Mitra D, Hodgkins P, Yen L, et al. Association between oral 5-ASA adherence and health care
- 29 utilization and costs among patients with active ulcerative colitis. *BMC gastroenterology*
- 30 2012;**12**:132 doi: 10.1186/1471-230X-12-132[published Online First: Epub Date]].
- 31 57. Modi A, Siris ES, Tang J, et al. Cost and consequences of noncompliance with osteoporosis
- 32 treatment among women initiating therapy. *Current medical research and opinion*
- 33 2015;**31**(4):757-65 doi: 10.1185/03007995.2015.1016605[published Online First: Epub
- 34 Date]].
- 35 58. Offord S, Lin J, Mirski D, et al. Impact of early nonadherence to oral antipsychotics on clinical and
- 36 economic outcomes among patients with schizophrenia. *Advances in therapy* 2013;**30**:286-
- 37 97 doi: 10.1007/s12325-013-0016-5[published Online First: Epub Date]].
- 38 59. Offord S, Lin J, Wong B, et al. Impact of oral antipsychotic medication adherence on healthcare
- 39 resource utilization among schizophrenia patients with Medicare coverage. *Community*
- 40 *mental health journal* 2013;**49**:625-9 doi: 10.1007/s10597-013-9638-y[published Online
- 41 First: Epub Date]].
- 42 60. Pittman DG, Chen W, Bowlin SJ, et al. Adherence to statins, subsequent healthcare costs, and
- 43 cardiovascular hospitalizations. *The American journal of cardiology* 2011;**107**:1662-6 doi:
- 44 10.1016/j.amjcard.2011.01.052[published Online First: Epub Date]].
- 45 61. Pittman DG, Tao Z, Chen W, et al. Antihypertensive medication adherence and subsequent
- 46 healthcare utilization and costs. *The American journal of managed care* 2010;**16**:568-76
- 47 62. Pruitt Z, Robst J, Langland-Orban B, et al. Healthcare costs associated with antiretroviral
- 48 adherence among medicaid patients. *Applied health economics and health policy*
- 49 2015;**13**:69-80 doi: 10.1007/s40258-014-0138-1[published Online First: Epub Date]].
- 50 63. Quittner AL, Zhang J, Marynchenko M, et al. Pulmonary medication adherence and health-care
- 51 use in cystic fibrosis. *Chest* 2014;**146**:142-51 doi: 10.1378/chest.13-1926[published Online
- 52 First: Epub Date]].
- 53
- 54
- 55
- 56
- 57
- 58
- 59
- 60

- 1
- 2
- 3 64. Rizzo JAS, W. R. Variations in compliance among hypertensive patients by drug class: implications
- 4 for health care costs. *Clinical therapeutics* 1997;**19**(6):1446-57; discussion 24-5
- 5 65. Robinson RL, Long SR, Chang S, et al. Higher costs and therapeutic factors associated with
- 6 adherence to NCCA HEDIS antidepressant medication management measures: analysis of
- 7 administrative claims. *Journal of managed care pharmacy : JMCP* 2006;**12**:43-54
- 8 66. Stroupe KT, Teal EY, Tu W, et al. Association of Refill Adherence and Health Care Use Among
- 9 Adults with Hypertension in an Urban Health Care System. *Pharmacotherapy* 2006;**26**:779-
- 10 89 doi: 10.1592/phco.26.6.779[published Online First: Epub Date]].
- 11 67. Sunycz JA, Mucha L, Baser O, et al. Impact of compliance and persistence with bisphosphonate
- 12 therapy on health care costs and utilization. *Osteoporosis international : a journal*
- 13 *established as result of cooperation between the European Foundation for Osteoporosis and*
- 14 *the National Osteoporosis Foundation of the USA* 2008;**19**:1421-9 doi: 10.1007/s00198-008-
- 15 0586-2[published Online First: Epub Date]].
- 16 68. Tan H, Cai Q, Agarwal S, et al. Impact of adherence to disease-modifying therapies on clinical and
- 17 economic outcomes among patients with multiple sclerosis. *Advances in therapy*
- 18 2011;**28**:51-61 doi: 10.1007/s12325-010-0093-7[published Online First: Epub Date]].
- 19 69. Tkacz J, Volpicelli J, Un H, et al. Relationship between buprenorphine adherence and health
- 20 service utilization and costs among opioid dependent patients. *Journal of substance abuse*
- 21 *treatment* 2014;**46**:456-62 doi: 10.1016/j.jsat.2013.10.014[published Online First: Epub
- 22 *Date*]].
- 23 70. Wan GJ, Kozma CM, Slaton TL, et al. Inflammatory bowel disease: healthcare costs for patients
- 24 who are adherent or non-adherent with infliximab therapy. *Journal of medical economics*
- 25 2014;**17**:384-93 doi: 10.3111/13696998.2014.909436[published Online First: Epub Date]].
- 26 71. Wei Y-J, Palumbo FB, Simoni-Wastila L, et al. Antiparkinson drug adherence and its association
- 27 with health care utilization and economic outcomes in a Medicare Part D population. *Value*
- 28 *in health : the journal of the International Society for Pharmacoeconomics and Outcomes*
- 29 *Research* 2014;**17**:196-204 doi: 10.1016/j.jval.2013.12.003[published Online First: Epub
- 30 *Date*]].
- 31 72. White TJV, Ann; Ory, Caron; Dezii, Christopher M.; Chang, Eunice. Economic Impact of Patient
- 32 Adherence with Antidepressant Therapy Within a Managed Care Organization. *Disease*
- 33 *Management & Health Outcomes* 2003;**11**(12):817-22 doi: 10.2165/00115677-200311120-
- 34 00006[published Online First: Epub Date]].
- 35 73. White TJV, Ann; Chang, Eunice; Dezii, Christopher M.; Abrams, Geoffrey D. The Costs of Non-
- 36 Adherence to Oral Antihyperglycemic Medication in Individuals with Diabetes Mellitus and
- 37 Concomitant Diabetes Mellitus and Cardiovascular Disease in a Managed Care Environment.
- 38 *Disease Management & Health Outcomes* 2004;**12**(3):181-88 doi: 10.2165/00115677-
- 39 200412030-00004[published Online First: Epub Date]].
- 40 74. Wu EQ, Johnson S, Beaulieu N, et al. Healthcare resource utilization and costs associated with
- 41 non-adherence to imatinib treatment in chronic myeloid leukemia patients. *Current medical*
- 42 *research and opinion* 2010;**26**:61-69 doi: 10.1185/03007990903396469[published Online
- 43 *First: Epub Date*]].
- 44 75. Wu J, Seiber E, Lacombe VA, et al. Medical utilization and costs associated with statin adherence
- 45 in Medicaid enrollees with type 2 diabetes. *The Annals of pharmacotherapy* 2011;**45**:342-9
- 46 doi: 10.1345/aph.1P539[published Online First: Epub Date]].
- 47 76. Wu N, Chen S, Boulanger L, et al. Duloxetine compliance and its association with healthcare costs
- 48 among patients with diabetic peripheral neuropathic pain. *Journal of medical economics*
- 49 2009;**12**:192-202 doi: 10.3111/13696990903240559[published Online First: Epub Date]].
- 50 77. Zhao Y, Chen S-Y, Wu N, et al. Medication Adherence and Healthcare Costs among Fibromyalgia
- 51 Patients Treated with Duloxetine. *Pain Practice* 2011;**11**:381-91 doi: 10.1111/j.1533-
- 52 2500.2010.00431.x[published Online First: Epub Date]].
- 53
- 54
- 55
- 56
- 57
- 58
- 59
- 60

- 1  
2  
3 78. Zhao Y, Johnston SS, Smith DM, et al. Association between teriparatide adherence and  
4 healthcare utilization and costs among hip fracture patients in the United States. *Bone*  
5 2014;**60**:221-6 doi: 10.1016/j.bone.2013.12.016[published Online First: Epub Date]].
- 6 79. Zhao Y, Johnston SS, Smith DM, et al. Association between teriparatide adherence and  
7 healthcare utilization and costs in real-world US kyphoplasty/vertebroplasty patients.  
8 *Osteoporosis International* 2013;**24**:2525-33 doi: 10.1007/s00198-013-2324-7[published  
9 Online First: Epub Date]].
- 10 80. Zhao Y, Zabriski S, Bertram C. Associations between statin adherence level, health care costs, and  
11 utilization. *Journal of managed care & specialty pharmacy* 2014;**20**:703-13
- 12 81. Robertson AG, Swanson JW, Van Dorn RA, et al. Treatment participation and medication  
13 adherence: effects on criminal justice costs of persons with mental illness. *Psychiatric*  
14 *services (Washington, DC)* 2014;**65**(10):1189-91 doi: 10.1176/appi.ps.201400247[published  
15 Online First: Epub Date]].
- 16 82. Kjellberg J, Jorgensen AD, Vestergaard P, et al. Cost and health care resource use associated with  
17 noncompliance with oral bisphosphonate therapy: an analysis using Danish health registries.  
18 *Osteoporosis International* 2016;**27**(12):3535-41 doi: 10.1007/s00198-016-3683-7[published  
19 Online First: Epub Date]].
- 20 83. Olsen KR, Hansen C, Abrahamsen B. Association between refill compliance to oral  
21 bisphosphonate treatment, incident fractures, and health care costs--an analysis using  
22 national health databases. *Osteoporosis international : a journal established as result of*  
23 *cooperation between the European Foundation for Osteoporosis and the National*  
24 *Osteoporosis Foundation of the USA* 2013;**24**:2639-47 doi: 10.1007/s00198-013-2365-  
25 y[published Online First: Epub Date]].
- 26 84. Miravittles M, Sicras A, Crespo C, et al. Costs of chronic obstructive pulmonary disease in relation  
27 to compliance with guidelines: a study in the primary care setting. *Therapeutic advances in*  
28 *respiratory disease* 2013;**7**:139-50 doi: 10.1177/1753465813484080[published Online First:  
29 Epub Date]].
- 30 85. Alvarez Payero M, Martinez Lopez de Castro N, Ucha Samartin M, et al. Medication non-  
31 adherence as a cause of hospital admissions. *Farmacia hospitalaria : organo oficial de*  
32 *expresion cientifica de la Sociedad Espanola de Farmacia Hospitalaria* 2014;**38**(4):328-33 doi:  
33 10.7399/fh.2014.38.4.7660[published Online First: Epub Date]].
- 34 86. Joe S, Lee JS. Association between non-compliance with psychiatric treatment and non-  
35 psychiatric service utilization and costs in patients with schizophrenia and related disorders.  
36 *BMC psychiatry* 2016;**16**(1):444 doi: 10.1186/s12888-016-1156-3[published Online First:  
37 Epub Date]].
- 38 87. Hong JS, Kang HC. Relationship between oral antihyperglycemic medication adherence and  
39 hospitalization, mortality, and healthcare costs in adult ambulatory care patients with type 2  
40 diabetes in South Korea. *Medical care* 2011;**49**:378-84 doi:  
41 10.1097/MLR.0b013e31820292d1[published Online First: Epub Date]].
- 42 88. Dilokthornsakul P, Chaiyakunapruk N, Nimpitakpong P, et al. The Effects of Medication Supply on  
43 Hospitalizations and Health-Care Costs in Patients with Chronic Heart Failure. *Value in Health*  
44 2012;**15**:S9-S14 doi: 10.1016/j.jval.2011.11.019[published Online First: Epub Date]].
- 45 89. An S-Y, Kim HJ, Chun KH, et al. Clinical and economic outcomes in medication-adherent and -  
46 nonadherent patients with type 2 diabetes mellitus in the Republic of Korea. *Clinical*  
47 *therapeutics* 2014;**36**:245-54 doi: 10.1016/j.clinthera.2013.12.012[published Online First:  
48 Epub Date]].
- 49 90. Dragomir A, Cote R, White M, et al. Relationship between adherence level to statins, clinical  
50 issues and health-care costs in real-life clinical setting. *Value in health : the journal of the*  
51 *International Society for Pharmacoeconomics and Outcomes Research* 2010;**13**(1):87-94 doi:  
52 10.1111/j.1524-4733.2009.00583.x[published Online First: Epub Date]].
- 53  
54  
55  
56  
57  
58  
59  
60



- 1  
2  
3 91. Dragomir A, Côté R, Roy L, et al. Impact of adherence to antihypertensive agents on clinical  
4 outcomes and hospitalization costs. *Medical care* 2010;**48**:418-25 doi:  
5 10.1097/MLR.0b013e3181d567bd[published Online First: Epub Date]].
- 6 92. Gentil L, Vasiliadis HM, Preville M, et al. Adherence to Oral Antihyperglycemic Agents Among  
7 Older Adults With Mental Disorders and Its Effect on Health Care Costs, Quebec, Canada,  
8 2005-2008. *Preventing chronic disease* 2015;**12**:E230 doi: 10.5888/pcd12.150412[published  
9 Online First: Epub Date]].
- 10 93. Knapp M, King D, Pugner K, et al. Non-adherence to antipsychotic medication regimens:  
11 associations with resource use and costs. *The British journal of psychiatry : the journal of*  
12 *mental science* 2004;**184**:509-16
- 13 94. Hong J, Reed C, Novick D, et al. Clinical and economic consequences of medication non-  
14 adherence in the treatment of patients with a manic/mixed episode of bipolar disorder:  
15 results from the European Mania in Bipolar Longitudinal Evaluation of Medication (EMBLEM)  
16 study. *Psychiatry research* 2011;**190**:110-4 doi: 10.1016/j.psychres.2011.04.016[published  
17 Online First: Epub Date]].
- 18 95. Deeks JJ HJ, Altman DG (editors). *Cochrane Handbook for Systematic Reviews of Interventions*  
19 *Version 5.1.0 [updated March 2011]. . The Cochrane Collaboration, 2011*
- 20 96. Haynes RB, McDonald H, Garg AX, et al. Interventions for helping patients to follow prescriptions  
21 for medications. *The Cochrane database of systematic reviews* 2002(2):CD000011 doi:  
22 10.1002/14651858.CD000011[published Online First: Epub Date]].
- 23 97. Hess LM, Raebel MA, Conner DA, et al. Measurement of adherence in pharmacy administrative  
24 databases: a proposal for standard definitions and preferred measures. *The Annals of*  
25 *pharmacotherapy* 2006;**40**(7-8):1280-88 doi: 10.1345/aph.1H018[published Online First:  
26 Epub Date]].
- 27 98. Sattler EL, Lee JS, Perri M, 3rd. Medication (re)fill adherence measures derived from pharmacy  
28 claims data in older Americans: a review of the literature. *Drugs & aging* 2013;**30**(6):383-99  
29 doi: 10.1007/s40266-013-0074-z[published Online First: Epub Date]].
- 30 99. Karve S, Cleves MA, Helm M, et al. An empirical basis for standardizing adherence measures  
31 derived from administrative claims data among diabetic patients. *Medical care*  
32 2008;**46**(11):1125-33 doi: 10.1097/MLR.0b013e31817924d2[published Online First: Epub  
33 Date]].
- 34 100. Gargon E, Williamson PR, Altman DG, et al. The COMET Initiative database: progress and  
35 activities from 2011 to 2013. *Trials* 2014;**15**:279 doi: 10.1186/1745-6215-15-279[published  
36 Online First: Epub Date]].
- 37 101. Hughes DA, Bagust A, Haycox A, et al. Accounting for noncompliance in pharmacoeconomic  
38 evaluations. *Pharmacoeconomics* 2001;**19**(12):1185-97
- 39  
40  
41  
42  
43  
44  
45  
46  
47  
48  
49  
50  
51  
52  
53  
54  
55  
56  
57  
58  
59  
60

## Figure Legends

### Figure 1: PRISMA Flow Diagram

The PRISMA diagram details the search and selection process applied during the overview. The search yielded a total of 2692 citations. Studies were selected based on the inclusion criteria; studies reporting the cost of medication nonadherence using original cost data. Intervention studies were required to report baseline data. Seventy five original studies met the inclusion criteria.

### Figure 2: Annual Adjusted Medication Nonadherence Costs per patient per year

Encompass the minimum, maximum and interquartile range of adjusted annual costs incurred by patients across disease groups where three or more studies were included for review. Gastrointestinal only included three studies limiting the range of costs. All cause costs encompass nonadherence costs incurred in mixed disease state studies, taking into account other confounding factors such as comorbidities.

### Figure 1: Annual Unadjusted Medication Nonadherence Costs per patient per year

Encompass the minimum, maximum and interquartile range of unadjusted annual costs incurred by patients across disease groups where three or more studies were included for review. Epilepsy only included three studies limiting the range of costs. All cause costs encompass nonadherence costs incurred in mixed disease state studies, taking into account other confounding factors such as comorbidities.

1  
2  
3  
4  
5  
6  
7  
8  
9  
10  
11  
12  
13  
14  
15  
16  
17  
18  
19  
20  
21  
22  
23  
24  
25  
26  
27  
28  
29  
30  
31  
32  
33  
34  
35  
36  
37  
38  
39  
40  
41  
42  
43  
44  
45  
46  
47  
48  
49  
50  
51  
52  
53  
54  
55  
56  
57  
58  
59  
60

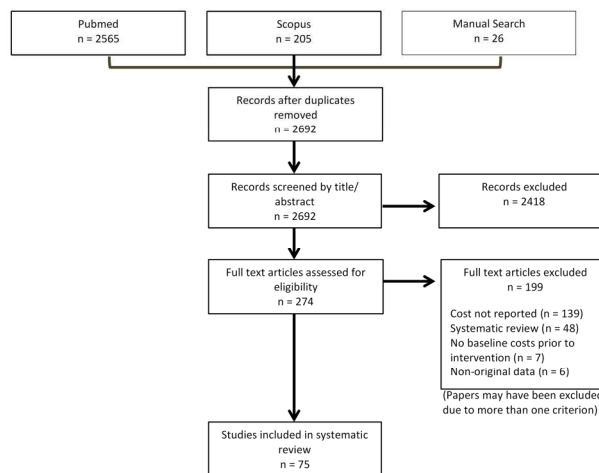

Figure 1: PRISMA Flow Diagram

209x297mm (300 x 300 DPI)

1  
2  
3  
4  
5  
6  
7  
8  
9  
10  
11  
12  
13  
14  
15  
16  
17  
18  
19  
20  
21  
22  
23  
24  
25  
26  
27  
28  
29  
30  
31  
32  
33  
34  
35  
36  
37  
38  
39  
40  
41  
42  
43  
44  
45  
46  
47  
48  
49  
50  
51  
52  
53  
54  
55  
56  
57  
58  
59  
60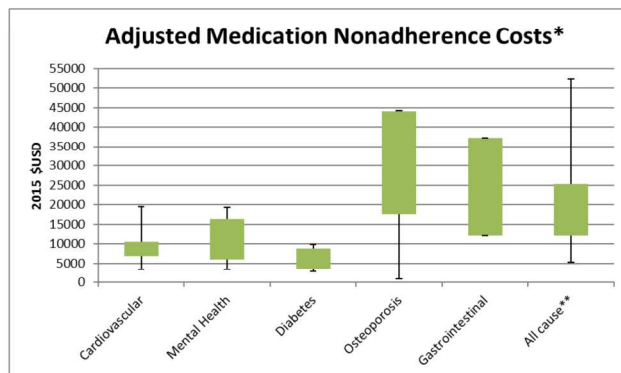

Figure 2: Annual Adjusted Medication Nonadherence Costs per patient per year \*Disease groups with three or more studies were included. Gastrointestinal only included three studies limiting the range of costs.\*\* All cause costs: mixed disease state studies

209x297mm (300 x 300 DPI)

1  
2  
3  
4  
5  
6  
7  
8  
9  
10  
11  
12  
13  
14  
15  
16  
17  
18  
19  
20  
21  
22  
23  
24  
25  
26  
27  
28  
29  
30  
31  
32  
33  
34  
35  
36  
37  
38  
39  
40  
41  
42  
43  
44  
45  
46  
47  
48  
49  
50  
51  
52  
53  
54  
55  
56  
57  
58  
59  
60

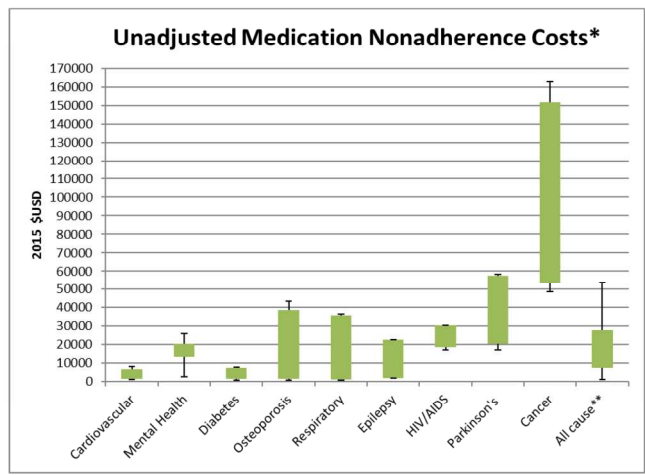

Figure 3: Annual Unadjusted Medication Nonadherence Costs per patient per year \*Disease groups with three or more studies were included. Epilepsy only included three studies limiting the range of costs.\*\* All cause costs: mixed disease state studies

209x297mm (300 x 300 DPI)

**eTable 1 Search Strategy**

| Database | Search Strategy                                                                                                                                                                                     |
|----------|-----------------------------------------------------------------------------------------------------------------------------------------------------------------------------------------------------|
| PubMed   | ((costs[TIAB] OR "Costs and Cost Analysis"[MH] OR burden[TIAB]) AND (nonadherence[TIAB] OR ("Patient Compliance"[MH] AND ("Drug Therapy"[MH] OR medication[TIAB]))) OR "Medication adherence"[MH])) |
| Scopus   | ( TITLE-ABS-KEY ( medication AND compliance OR patient AND compliance ) ) AND ( TITLE-ABS-KEY ( statistical AND model ) ) AND ( TITLE-ABS-KEY ( health AND care AND cost ) )                        |

eTable 2: Studies identified with costs reported by adherence level and disease state

| Author, Year, Country                                | Objective                                                                                                                                                                             | Study Characteristics                                                                                                                                       | Adherence (as reported in paper)                                                                                                                     | Outcomes/ Indicators                                                                  | Results (USD, 2015)                                                                                                                                                                                                                                                   | Quality                                                           |
|------------------------------------------------------|---------------------------------------------------------------------------------------------------------------------------------------------------------------------------------------|-------------------------------------------------------------------------------------------------------------------------------------------------------------|------------------------------------------------------------------------------------------------------------------------------------------------------|---------------------------------------------------------------------------------------|-----------------------------------------------------------------------------------------------------------------------------------------------------------------------------------------------------------------------------------------------------------------------|-------------------------------------------------------------------|
| <b>Cardiovascular Disease</b>                        |                                                                                                                                                                                       |                                                                                                                                                             |                                                                                                                                                      |                                                                                       |                                                                                                                                                                                                                                                                       |                                                                   |
| <i>Aubert et al</i> [1]<br>2010<br>US                | To investigate whether compliance during the first 2 years of statin therapy is associated with reduced hospitalization rates and direct medical costs during year 3.                 | <u>Design:</u> Retrospective cohort study<br><u>Follow Up:</u> 3 years<br><u>Sample Size:</u> 10227 (A:3512, NA:6715)                                       | <u>Measure:</u> MPR<br><u>Classification:</u> MPR < 80 = non-compliant<br><u>Method of Assessment:</u> pharmacy claims data                          | Total Healthcare costs<br>Medical Costs                                               | <u>Type of Costs:</u> adjusted<br><u>Classification:</u> disease state specific<br><u>Currency Year:</u> USD, 2002<br><u>Cost of Nonadherence:</u> THC:\$5289.61 (\$6865.90), MC:\$4908.09 (\$6370.60)                                                                | <u>Quality:</u> medium<br><u>Classification:</u> cost description |
| <i>Casciano et al</i> [2]<br>2013<br>US              | To assess the economic burden of underuse and nonadherence of warfarin therapy among patients with non-valvular atrial fibrillation in a commercially insured population.             | <u>Design:</u> Retrospective, observational, quasi-experimental study<br><u>Follow Up:</u> 18months<br><u>Sample Size:</u> 13289 (A:2852, NA:4184, NE:6253) | <u>Measure:</u> PDC<br><u>Classification:</u> PDC <80 = low adherence, 0 = no warfarin exposure<br><u>Method of Assessment:</u> pharmacy claims data | Total Costs<br>Inpatient Costs<br>Outpatient Costs<br>Pharmacy Costs<br>Medical Costs | <u>Type of Costs:</u> adjusted<br><u>Classification:</u> all cause<br><u>Currency Year:</u> USD, 2005<br><u>Cost of Nonadherence*:</u> TC:\$16612.44(\$19936.70), IC:\$9382.56 (\$11260.10), OC:\$8605.92 (\$10328), PC:\$2388.24 (\$2866.20), MC:\$15235.80(\$18285) | <u>Quality:</u> medium<br><u>Classification:</u> cost description |
| <i>Dilokthornsakul et al</i> [3]<br>2012<br>Thailand | To determine the effects of medication supplies on healthcare costs and hospitalizations in patients with chronic heart failure receiving angiotensin converting enzyme inhibitors or | <u>Design:</u> Retrospective cohort study<br><u>Follow Up:</u> 1 year<br><u>Sample Size:</u> 393 (A:168, NA:219, OA:6)                                      | <u>Measure:</u> MPR<br><u>Classification:</u> MPR < 80 = undersupply, MPR >120 = oversupply<br><u>Method of Assessment:</u> pharmacy claims data     | Total Healthcare Costs<br>Inpatient Costs<br>Outpatient Costs                         | <u>Type of Costs:</u> unadjusted<br><u>Classification:</u> disease state specific<br><u>Currency Year:</u> USD, 2004<br><u>Cost of Nonadherence:</u> THC:\$1157 (\$1433.06), IC:\$1019 (\$1262.13), OC:\$138 (\$170.93)                                               | <u>Quality:</u> high<br><u>Classification:</u> cost description   |

1  
2  
3  
4  
5  
6  
7  
8  
9  
10  
11  
12  
13  
14  
15  
16  
17  
18  
19  
20  
21  
22  
23  
24  
25  
26  
27  
28  
29  
30  
31  
32  
33  
34  
35  
36  
37  
38  
39  
40  
41  
42  
43  
44  
45  
46

|                                             |                                                                                                                                                            |                                                                                                                         |                                                                                                                                              |                                                                                    |                                                                                                                                                                                                                                                                                                                                                                                                                                                                                                                                                                                                |                                                                   |
|---------------------------------------------|------------------------------------------------------------------------------------------------------------------------------------------------------------|-------------------------------------------------------------------------------------------------------------------------|----------------------------------------------------------------------------------------------------------------------------------------------|------------------------------------------------------------------------------------|------------------------------------------------------------------------------------------------------------------------------------------------------------------------------------------------------------------------------------------------------------------------------------------------------------------------------------------------------------------------------------------------------------------------------------------------------------------------------------------------------------------------------------------------------------------------------------------------|-------------------------------------------------------------------|
| <i>Dragomir et al</i> [4]<br>2010<br>Canada | angiotensin receptor blockers.<br>To evaluate the impact of low adherence to antihypertensive agents on cardiovascular outcomes and hospitalization costs. | <u>Design:</u> Retrospective cohort study<br><u>Follow Up:</u> 3 years<br><u>Sample Size:</u> 56896 (A:38217, NA:18679) | <u>Measure:</u> MPR<br><u>Classification:</u> MPR≥80 = adherent, MPR < 80 = nonadherent<br><u>Method of Assessment:</u> pharmacy claims data | Total Healthcare Costs<br>Pharmacy Costs<br>Medical Costs<br>Hospitalization Costs | <u>Type of Costs:</u> unadjusted and predicted<br><u>Classification:</u> disease state specific and hospitalised patients<br><u>Currency Year:</u> CAD, 2006<br><u>Cost of Nonadherence:</u> Unadjusted<br>Disease state specific: THC:\$7165 (\$6900.87), PC: \$1800 (\$1733.64), MC: \$1370 (\$1319.50), HC: \$3995 (\$3847.73)<br>Unadjusted Hospitalised patients: THC: \$17397 (\$16755.67), PC:\$2685 (\$2586.02), MC:\$2608 (\$2511.86), HC: \$12104 (\$11657.79)<br>Predicted disease state specific: HC:\$3877 (\$3734.08)<br>Predicted hospitalised patient: HC:\$11715 (\$11283.13) | <u>Quality:</u> medium<br><u>Classification:</u> cost description |
| <i>Dragomir et al</i> [5]<br>2010<br>Canada | To evaluate the impact of low adherence to statins on clinical issues and direct healthcare costs.                                                         | <u>Design:</u> Retrospective cohort study<br><u>Follow Up:</u> 3 years<br><u>Sample Size:</u> 55134 (A:28549, NA:26585) | <u>Measure:</u> MPR<br><u>Classification:</u> MPR≥80 = adherent, MPR < 80 = nonadherent<br><u>Method of Assessment:</u> pharmacy claims data | Total Healthcare Costs<br>Pharmacy Costs<br>Medical Costs<br>Hospitalization Costs | <u>Type of Costs:</u> unadjusted and predicted<br><u>Classification:</u> disease state specific and hospitalised patients<br><u>Currency Year:</u> CAD, 2005<br><u>Cost of Nonadherence:</u> Unadjusted<br>Disease state specific: THC:\$6243 (\$6175.76), PC:\$2506 (\$2479.01), MC:\$1241 (\$1227.63), HC:\$2496 (\$2469.12)<br>Unadjusted Hospitalised patients: THC:\$14725 (\$14566.40), PC:\$3374 (\$3337.66), MC:\$2475 (\$2448.34), HC:\$8876 (\$8780.40)<br>Predicted disease state specific:                                                                                         | <u>Quality:</u> medium<br><u>Classification:</u> cost description |



|    |                          |                       |                              |                        |                                          |                                               |
|----|--------------------------|-----------------------|------------------------------|------------------------|------------------------------------------|-----------------------------------------------|
| 1  |                          |                       |                              |                        |                                          |                                               |
| 2  |                          |                       |                              |                        |                                          |                                               |
| 3  |                          |                       |                              |                        |                                          |                                               |
| 4  |                          |                       |                              |                        | HC:\$2669 (\$2640.25)                    |                                               |
| 5  |                          |                       |                              |                        | Predicted hospitalised patient: HC\$9214 |                                               |
| 6  |                          |                       |                              |                        | (\$9114.76)                              |                                               |
| 7  | <i>Pittman et al</i> [6] | To examine the        | <u>Design:</u> Retrospective | <u>Measure:</u> MPR    | Total                                    | <u>Type of Costs:</u> adjusted                |
| 8  | 2011                     | relation among statin | cohort study                 | <u>Classification:</u> | Healthcare                               | <u>Classification:</u> all cause and disease  |
| 9  | US                       | adherence, subsequent | <u>Follow Up:</u> 18 months  | MPR $\geq$ 80 =        | Costs                                    | state specific                                |
| 10 |                          | hospitalizations and  | <u>Sample Size:</u> 381422   | adherent, MPR          | Pharmacy                                 | <u>Currency Year:</u> USD, 2009               |
| 11 |                          | healthcare costs.     | (A:258013, MA:65795,         | >60<79% =              | Costs                                    | <u>Cost of Nonadherence*:</u> all cause:      |
| 12 |                          |                       | LA:57614)                    | moderate               | Medical Costs                            | THC(>80):\$6798.67 (\$7505.66),               |
| 13 |                          |                       |                              | adherence, MPR         |                                          | THC(60-79):\$7072.67 (\$7808.16),             |
| 14 |                          |                       |                              | <59 =low               |                                          | THC(<59):\$7401.33 (\$8170.99),               |
| 15 |                          |                       |                              | adherence              |                                          | PC(>80):\$1767.33 (\$1951.11),                |
| 16 |                          |                       |                              | <u>Method of</u>       |                                          | PC(60-79):\$1789.33 (\$1975.40),              |
| 17 |                          |                       |                              | <u>Assessment:</u>     |                                          | PC(<59):\$1937.33 (\$2138.79),                |
| 18 |                          |                       |                              | pharmacy claims        |                                          | MC(>80):\$4472.67 (\$4937.78),                |
| 19 |                          |                       |                              | data                   |                                          | MC(60-79):\$4840.67 (\$5344.05),              |
| 20 |                          |                       |                              |                        |                                          | MC(<59):\$5138.67 (\$5673.04)                 |
| 21 |                          |                       |                              |                        |                                          | Disease state specific:                       |
| 22 |                          |                       |                              |                        |                                          | PC(>80):\$558.67 (\$616.77),                  |
| 23 |                          |                       |                              |                        |                                          | PC(60-79):\$442.67 (\$488.70),                |
| 24 |                          |                       |                              |                        |                                          | PC(<59):\$325.33 (\$359.16),                  |
| 25 |                          |                       |                              |                        |                                          | MC(>80):\$1596.67 (\$1762.71),                |
| 26 |                          |                       |                              |                        |                                          | MC(60-79):\$1722 (\$1901.07),                 |
| 27 |                          |                       |                              |                        |                                          | MC(<59):\$1792.67 (\$1979.09)                 |
| 28 |                          |                       |                              |                        |                                          |                                               |
| 29 |                          |                       |                              |                        |                                          |                                               |
| 30 | <i>Pittman et al</i> [7] | To evaluate the       | <u>Design:</u> Retrospective | <u>Measure:</u> MPR    | Total                                    | <u>Type of Costs:</u> adjusted and unadjusted |
| 31 | 2010                     | relationship between  | cohort study                 | <u>Classification:</u> | Healthcare                               | <u>Classification:</u> disease state specific |
| 32 | US                       | adherence to          | <u>Follow Up:</u> 2 years    | MPR $\geq$ 80 =        | Costs                                    | <u>Currency Year:</u> USD, 2008               |
| 33 |                          | antihypertensive      | <u>Sample Size:</u>          | adherent, MPR          | Outpatient                               | <u>Cost of Nonadherence:</u> Adjusted:        |
| 34 |                          | medications and       | 625620(A:467006,             | >60<79% =              | Costs                                    | THC(>80):\$7261 (\$8077.79),                  |
| 35 |                          | subsequent            | MA:96226, LA:62388)          | moderate               | ED Costs                                 | THC(60-79):\$7530 (\$8377.05),                |
| 36 |                          | hospitalizations,     |                              | adherence, MPR         | Pharmacy                                 | THC(<59):\$7370 (\$8199.05),                  |
| 37 |                          | emergency             |                              | <59 =low               | Costs                                    | OC(>80):\$3390 (\$3771.34),                   |
| 38 |                          | department visits and |                              | adherence              | Hospitalization                          | OC(60-79):\$3705 (\$4121.77),                 |
| 39 |                          |                       |                              |                        |                                          |                                               |
| 40 |                          |                       |                              |                        |                                          |                                               |
| 41 |                          |                       |                              |                        |                                          |                                               |
| 42 |                          |                       |                              |                        |                                          |                                               |
| 43 |                          |                       |                              |                        |                                          |                                               |
| 44 |                          |                       |                              |                        |                                          |                                               |
| 45 |                          |                       |                              |                        |                                          |                                               |
| 46 |                          |                       |                              |                        |                                          |                                               |

1  
2  
3  
4  
5  
6  
7  
8  
9  
10  
11  
12  
13  
14  
15  
16  
17  
18  
19  
20  
21  
22  
23  
24  
25  
26  
27  
28  
29  
30  
31  
32  
33  
34  
35  
36  
37  
38  
39  
40  
41  
42  
43  
44  
45  
46

costs of care.

Method of Assessment:  
pharmacy claims data

Costs

OC(<59):\$3776 (\$4200.76),  
EDC(>80):\$101 (\$112.36),  
EDC(60-79):\$134 (\$149.07),  
EDC(<59):\$172 (\$191.35),  
PC(>80):\$2383 (\$2651.06),  
PC(60-79):\$1932 (\$2149.33),  
PC(<59):\$1509 (\$1678.75),  
HC(>80):\$1386 (\$1541.91),  
HC(60-79):\$1759 (\$1956.87),  
HC(<59):\$1913 (\$2128.19)  
Unadjusted:  
THC(>80):\$7182 (\$7989.90),  
THC(60-79):\$7560 (\$8410.42),  
THC(<59):\$7995 (\$8894.35),  
OC(>80):\$3396 (\$3778.01),  
OC(60-79):\$3635 (\$4043.90),  
OC(<59):\$3887 (\$4324.25),  
EDC(>80):\$102 (\$113.47),  
EDC(60-79):\$131 (\$145.74),  
EDC(<59):\$172 (\$191.35),  
PC(>80):\$2317 (\$2577.64),  
PC(60-79):\$2034 (\$2262.80),  
PC(<59):\$1880 (\$2091.48),  
HC(>80):\$1366 (\$1519.66),  
HC(60-79):\$1759 (\$1956.87),  
HC(<59):\$2057 (\$2288.39)*Rizzo et al*[8]  
1997  
USTo investigate variations in compliance with four classes of antihypertensive agents- diuretics, ACEIs, CCBs and  $\beta$ -Design: Retrospective cohort studyFollow Up: 12 monthsSample Size:

7211(P:2668, NC:3101, NP:649, T:793)

Measure: ordinary least square

regression analysis

Classification:>80% = persistent,  $\geq$ 30<80% = non-compliance, <30%

Total Healthcare Costs

Type of Costs: unadjusted  
Classification: all cause and disease state specific  
Currency Year: USD, 1994  
Cost of Nonadherence: All cause:  
THC(>80):\$341 (\$509.66),  
THC(30-80):\$694 (\$1037.26),Quality: low  
Classification: cost description

blockers and the health care costs associated with various degrees of compliance.

= non-persistence  
Method of Assessment:  
 pharmacy claims data

THC(<30):\$735 (\$1098.53)  
 Disease state specific:  
 Renal:  
 THC(>80):\$2135 (\$3190.98),  
 THC(30-80):\$2488 (\$3718.58),  
 THC(<30):\$2529 (\$3779.86),  
 Acute MI:  
 THC(>80):\$1358 (\$2029.67),  
 THC(30-80):\$1711 (\$2557.27),  
 THC(<30):\$1752 (\$2618.55), Diabetes:  
 THC(>80):\$770 (\$1150.85),  
 THC(30-80):\$1123 (\$1678.44),  
 THC(<30):\$1164 (\$1739.72),  
 CHF:  
 THC(>80):\$698 (\$1043.23),  
 THC(30-80):\$1051 (\$1570.83),  
 THC(<30):\$1092 (\$1632.11),  
 Angina:  
 THC(>80):\$702 (\$1049.21),  
 THC(30-80):\$1055 (\$1576.81),  
 THC(<30):\$1096 (\$1638.09)

Sokol et al[9]  
 2005  
 US

To evaluate the impact of medication adherence on healthcare utilisation and cost for 4 chronic conditions that are major drivers of drug spending: diabetes, hypertension, hypercholesterolemia, and congestive heart failure.

Design: Retrospective cohort observational study  
Follow Up: 12 months  
Sample Size: 137277  
 Diabetes:(≥80: 1801, 60-79: 599, 40-59: 419, 20-39: 259, <19: 182)  
 Hypertension:(≥80: 5804, 60-79: 921, 40-59: 562, 20-39: 344, <19: 350)

Measure:  
 medication supply  
Classification: 1-19%, 20-39%, 40-59%, 60-79%, 80-100%  
Method of Assessment:  
 pharmacy claims data

Total Costs  
 Pharmacy Costs  
 Medical Costs

Type of Costs: adjusted  
Classification: all cause and disease state specific  
Currency Year: USD, 1998  
Cost of Nonadherence: All cause:  
 Diabetes:  
 TC(1-19):\$16498 (\$23071.58),  
 TC(20-39):\$13077 (\$18287.49),  
 TC(40-59):\$12978 (\$18149.05),  
 TC(60-79):\$11484 (\$16059.77),  
 TC(80-100):\$8886 (\$12426.60),  
 PC(1-19):\$1312 (\$1834.76),

Quality: medium  
Classification: cost description

1  
2  
3  
4  
5  
6  
7  
8  
9  
10  
11  
12  
13  
14  
15  
16  
17  
18  
19  
20  
21  
22  
23  
24  
25  
26  
27  
28  
29  
30  
31  
32  
33  
34  
35  
36  
37  
38  
39  
40  
41  
42  
43  
44  
45  
46

Hypercholesterolemia:  
(≥80: 1754, 60-79: 520,  
40-59: 324, 20-39: 216,  
<19: 167)  
CHF: (≥80: 518, 60-79:  
107, 40-59: 82, 20-39:  
70, <19: 86)

PC(20-39):\$1877 (\$2624.89),  
PC(40-59):\$1970 (\$2754.94),  
PC(60-79):\$2121 (\$2966.11),  
PC(80-100):\$2510 (\$3510.10),  
MC(1-19):\$15186 (\$21236.82),  
MC(20-39):\$11200 (\$15662.61),  
MC(40-59):\$11008 (\$15394.10),  
MC(60-79):\$9363 (\$13093.66),  
MC(80-100):\$6377 (\$8917.90),  
Hypertension:  
TC(1-19):\$9747 (\$13630.66),  
TC(20-39):\$11238 (\$15715.75),  
TC(40-59):\$9491 (\$13272.66),  
TC(60-79):\$8929 (\$12486.73),  
TC(80-100):\$8386 (\$11272.38),  
PC(1-19):\$916 (\$1280.98),  
PC(20-39):\$952 (\$1331.32),  
PC(40-59):\$1123 (\$1570.46),  
PC(60-79):\$1271 (\$1777.43),  
PC(80-100):\$1817 (\$2540.98),  
MC(1-19):\$8831 (\$12349.69),  
MC(20-39):\$10286 (\$14384.43),  
MC(40-59):\$8368 (\$11702.20),  
MC(60-79):\$7658 (\$10709.31),  
MC(80-100):\$6570 (\$9187.80),  
Hypercholesterolemia:  
TC(1-19):\$10916 (\$15265.45),  
TC(20-39):\$7982 (\$11162.40),  
TC(40-59):\$6756 (\$9447.91),  
TC(60-79):\$8412 (\$11763.74),  
TC(80-100):\$6752 (\$9442.31),  
PC(1-19):\$1067 (\$1492.14),  
PC(20-39):\$1152 (\$1611.01),

1  
2  
3  
4  
5  
6  
7  
8  
9  
10  
11  
12  
13  
14  
15  
16  
17  
18  
19  
20  
21  
22  
23  
24  
25  
26  
27  
28  
29  
30  
31  
32  
33  
34  
35  
36  
37  
38  
39  
40  
41  
42  
43  
44  
45  
46

PC(40-59):\$1247 (\$1743.86),  
PC(60-79):\$1736 (\$2427.70),  
PC(80-100):\$1972 (\$2757.74),  
MC(1-19):\$9849(\$13773.30),  
MC(20-39):\$6830 (\$9551.39),  
MC(40-59):\$5509 (\$7704.04),  
MC(60-79):\$6676 (\$9336.03),  
MC(80-100):\$4780 (\$6684.58),  
CHF:  
TC(1-19):\$23964 (\$33512.38),  
TC(20-39):\$19188 (\$26833.40),  
TC(40-59):\$26311 (\$36794.54),  
TC(60-79):\$29785 (\$41652.74),  
TC(80-100):\$22164 (\$30995.18),  
PC(1-19):\$1961 (\$2742.35),  
PC(20-39):\$2055 (\$2873.81),  
PC(40-59):\$2208 (\$3087.77),  
PC(60-79):\$3412 (\$4771.50),  
PC(80-100):\$3107 (\$4344.97),  
MC(1-19):\$22003 (\$30770.03),  
MC(20-39):\$17133 (\$23959.59),  
MC(40-59):\$24103 (\$33706.77),  
MC(60-79):\$26373 (\$36881.24),  
MC(80-100):\$19056 (\$26648.81)  
Disease state specific: Diabetes:  
TC(1-19):\$8867 (\$12400.03),  
TC(20-39):\$7124 (\$9916.90),  
TC(40-59):\$6522 (\$9120.67),  
TC(60-79):\$6291 (\$8797.63),  
TC(80-100):\$4570 (\$6390.90),  
PC(1-19):\$55 (\$76.91),  
PC(20-39):\$165 (\$230.74),  
PC(40-59):\$285 (\$398.56),

1  
2  
3  
4  
5  
6  
7  
8  
9  
10  
11  
12  
13  
14  
15  
16  
17  
18  
19  
20  
21  
22  
23  
24  
25  
26  
27  
28  
29  
30  
31  
32  
33  
34  
35  
36  
37  
38  
39  
40  
41  
42  
43  
44  
45  
46

PC(60-79):\$404 (\$564.97),  
PC(80-100):\$763 (\$1067.02),  
MC(1-19):\$8812 (\$12323.11),  
MC(20-39):\$6959 (\$9731.79),  
MC(40-59):\$6237 (\$8722.11),  
MC(60-79):\$5887 (\$8232.66),  
MC(80-100):\$3808 (\$5325.29),  
Hypertension:  
TC(1-19):\$4878 (\$6821.62),  
TC(20-39):\$6062 (\$8477.39),  
TC(40-59):\$5297 (\$7407.57),  
TC(60-79):\$5262 (\$7358.63),  
TC(80-100):\$4871 (\$6811.84),  
PC(1-19):\$31 (\$43.35),  
PC(20-39):\$89(\$124.46),  
PC(40-59):\$184 (\$257.31),  
PC(60-79):\$285 (\$398.56),  
PC(80-100):\$489 (\$683.84),  
MC(1-19):\$4847 (\$6778.27),  
MC(20-39):\$5973 (\$8352.92),  
MC(40-59):\$5113 (\$7150.26),  
MC(60-79):\$4977 (\$6960.07),  
MC(80-100):\$4383 (\$6129.39),  
Hypercholesterolemia:  
TC(1-19):\$6888 (\$9632.50),  
TC(20-39):\$4999 (\$6990.84),  
TC(40-59):\$3825 (\$5349.06),  
TC(60-79):\$5541 (\$7748.79),  
TC(80-100):\$3924(\$5487.51),  
PC(1-19):\$78 (\$109.08),  
PC(20-39):\$213 (\$297.87),  
PC(40-59):\$373 (\$521.62),  
PC(60-79):\$603 (\$843.26),

For peer review only

PC(80-100):\$801 (\$1120.16),  
 MC(1-19):\$6810 (\$9523.42),  
 MC(20-39):\$4786 (\$6692.97),  
 MC(40-59):\$3452 (\$4827.44),  
 MC(60-79):\$4938 (\$6905.53),  
 MC(80-100):\$3124 (\$4368.75),  
 CHF:  
 TC(1-19):\$9841 (\$13762.12),  
 TC(20-39):\$7733 (\$10814.19),  
 TC(40-59):\$11378 (\$15911.53),  
 TC(60-79):\$13924 (\$19471.98),  
 TC(80-100):\$12698 (\$17787.48),  
 PC(1-19):\$15 (\$20.98),  
 PC(20-39):\$90 (\$125.86),  
 PC(40-59):\$134 (\$187.39),  
 PC(60-79):\$158 (\$220.95),  
 PC(80-100):\$437 (\$611.12),  
 MC(1-19):\$9826 (\$13741.14),  
 MC(20-39):\$7643 (\$10688.33),  
 MC(40-59):\$11244 (\$15724.14),  
 MC(60-79):\$13766 (\$19251.02),  
 MC(80-100):\$12261 (\$17146.36)

|    |                           |                                                                                                                                                                                                           |                                                                                                                       |                                                                                                                                                |                                                                                 |                                                                                                                                                                                                                                                    |                                                                   |
|----|---------------------------|-----------------------------------------------------------------------------------------------------------------------------------------------------------------------------------------------------------|-----------------------------------------------------------------------------------------------------------------------|------------------------------------------------------------------------------------------------------------------------------------------------|---------------------------------------------------------------------------------|----------------------------------------------------------------------------------------------------------------------------------------------------------------------------------------------------------------------------------------------------|-------------------------------------------------------------------|
| 28 | <i>Stroupe et al</i> [10] | To determine the rates of undersupply, appropriate supply, and oversupply of antihypertensive drugs as measured by refill adherence, among patient with complicated and uncomplicated hypertension and to | <u>Design:</u> Retrospective cohort study<br><u>Follow Up:</u> 3.3 years<br><u>Sample Size:</u> 15206 (not specified) | <u>Measure:</u> MPR<br><u>Classification:</u> MPR<80 = undersupply, MPR >120 = oversupply<br><u>Method of Assessment:</u> pharmacy claims data | Total Healthcare Costs<br>Inpatient Costs<br>Outpatient Costs<br>Pharmacy Costs | <u>Type of Costs:</u> unadjusted<br><u>Classification:</u> disease state specific<br><u>Currency Year:</u> USD, 2002<br><u>Cost of Nonadherence**:</u> THC:\$6032.5 (\$7830.11), IC:\$2067 (\$2682.94), OC:\$3965 (\$5146.52), PC:\$130 (\$168.74) | <u>Quality:</u> medium<br><u>Classification:</u> cost description |
|----|---------------------------|-----------------------------------------------------------------------------------------------------------------------------------------------------------------------------------------------------------|-----------------------------------------------------------------------------------------------------------------------|------------------------------------------------------------------------------------------------------------------------------------------------|---------------------------------------------------------------------------------|----------------------------------------------------------------------------------------------------------------------------------------------------------------------------------------------------------------------------------------------------|-------------------------------------------------------------------|

1  
2  
3  
4  
5  
6  
7  
8  
9  
10  
11  
12  
13  
14  
15  
16  
17  
18  
19  
20  
21  
22  
23  
24  
25  
26  
27  
28  
29  
30  
31  
32  
33  
34  
35  
36  
37  
38  
39  
40  
41  
42  
43  
44  
45  
46

examine the association of refill adherence with hospitalization and healthcare costs among these patients.

*Wu et al*[11]  
2011  
US

To study statin adherence and assess associated medical utilisation and healthcare costs in patients with type 2 diabetes, based on national Medicaid database.

Design: Retrospective cohort study  
Follow Up: 1 year  
Sample Size: 1705 (A:624, NA:1081)

Measure: MPR  
Classification: MPR≥80 = adherent, MPR <80 = nonadherent  
Method of Assessment: pharmacy claims data

Total Healthcare Costs  
Pharmacy Costs  
Medical Costs

Type of Costs: adjusted  
Classification: all cause and disease state specific  
Currency Year: USD, 2005  
Cost of Nonadherence: all cause: THC:\$17807 (\$21370.30), PC:\$4915 (\$5898.52) MC:\$12892 (\$15471.77)  
Disease state specific: THC:\$2789 (\$3347.10), PC:\$489(\$586.85) MC:\$2300 (\$2760.25)

Quality: medium  
Classification: cost description

*Zhao et al*[12]  
2014  
US

To evaluate the associations between statin adherence level, healthcare costs, hospital admissions and emergency room visits after statin therapy is taken for 1 year.

Design: Retrospective cohort study  
Follow Up: 1 year  
Sample Size: 10312 (96-100: 2453, 90-95: 1496, 85-89: 584, 80-84: 768, 70-79: 960, 60-69: 777, 40-59: 1687, <40:1587)

Measure: MPR  
Classification: <40%, 40-59%, 60-69%, 70-79%, 80-84%, 85-89%, 90-95%, 96-100%  
Method of Assessment: pharmacy claims data, census data

Total Healthcare Costs  
Pharmacy Costs  
Medical Costs

Type of Costs: unadjusted  
Classification: all cause and disease state specific  
Currency Year: USD, 2010  
Cost of Nonadherence: all cause: PC(96-100):\$2976.80 (\$3247.04), PC(90-95):\$2826.99 (\$3083.63), PC(85-89):\$2795.39 (\$3049.16), PC(80-84):\$2690.89 (\$2935.17), PC(70-79):\$2192.83 (\$2391.90), PC(60-69):\$2323.27 (\$2534.18), PC(40-59):\$2153.93 (\$2349.47), PC(<40):\$1749.18 (\$1907.97)  
Disease state specific: THC(96-100):\$6536.05 (\$7129.40), THC(90-95):\$6493.80 (\$7083.31),

Quality: medium  
Classification: cost description



For peer review only

THC(85-89):\$6459.40 (\$7045.79),  
 THC(80-84):\$6227.47 (\$6792.80),  
 THC(70-79):\$5713.47 (\$6232.14),  
 THC(60-69):\$5875.26 (\$6408.62),  
 THC(40-59):\$5817.58 (\$6345.70),  
 THC(<40):\$5249.12 (\$5725.64),  
 PC(96-100):\$449.86 (\$490.70), PC(90-95):\$439.74 (\$479.66),  
 PC(85-89):\$458.83 (\$500.48),  
 PC(80-84):\$423.15 (\$461.56),  
 PC(70-79):\$356.74 (\$389.13),  
 PC(60-69):\$371.30 (\$405.01),  
 PC(40-59):\$279.21 (\$304.56),  
 PC(<40):\$133.92 (\$146.08),  
 MC(96-100):\$3559.25 (\$3882.36),  
 MC(90-95):\$3666.81 (\$3999.69),  
 MC(85-89):\$3664 (\$3996.62), MC(80-84):\$3586.58 (\$3912.17), MC(70-79):\$3520.64 (\$3840.25), MC(60-69):\$3551.99 (\$3874.44), MC(40-59):\$3663.65 (\$3996.24),  
 MC(<40):\$3499.95 (\$3817.68)

**Mental Health**

|                                                                                             |                                                                                                                                                                                                                                                                                                                                                |                                                                                                                                                                        |                                                                                                                                                                                                                                                                                                     |                                                                                                                                                                                                                                               |                                                                                                                                                                                                                                                                                                                              |                                                                                                 |
|---------------------------------------------------------------------------------------------|------------------------------------------------------------------------------------------------------------------------------------------------------------------------------------------------------------------------------------------------------------------------------------------------------------------------------------------------|------------------------------------------------------------------------------------------------------------------------------------------------------------------------|-----------------------------------------------------------------------------------------------------------------------------------------------------------------------------------------------------------------------------------------------------------------------------------------------------|-----------------------------------------------------------------------------------------------------------------------------------------------------------------------------------------------------------------------------------------------|------------------------------------------------------------------------------------------------------------------------------------------------------------------------------------------------------------------------------------------------------------------------------------------------------------------------------|-------------------------------------------------------------------------------------------------|
| <p>29 <i>Bagalman et al</i>[13]<br/>                 30 2010<br/>                 31 US</p> | <p>To examine the<br/>                 association between<br/>                 treatment adherence<br/>                 and indirect<br/>                 productivity costs<br/>                 within a cohort of<br/>                 commercially insured<br/>                 employees with bipolar<br/>                 disorder.</p> | <p><u>Design:</u> Retrospective<br/>                 cohort study<br/> <u>Follow Up:</u> 1 year<br/> <u>Sample Size:</u> 1258<br/>                 (A:444, NA:814)</p> | <p><u>Measure:</u> MPR<br/> <u>Classification:</u><br/>                 MPR≥80 =<br/>                 adherent, MPR<br/>                 &lt;80 =<br/>                 nonadherent<br/> <u>Method of</u><br/> <u>Assessment:</u><br/>                 pharmacy claims<br/>                 data</p> | <p>Total Costs<br/>                 Short term<br/>                 disability cost<br/>                 Workers<br/>                 compensation<br/>                 cost<br/>                 Paid time off<br/>                 cost</p> | <p><u>Type of Costs:</u> adjusted<br/> <u>Classification:</u> disease state specific<br/> <u>Currency Year:</u> USD, 2005<br/> <u>Cost of Nonadherence:</u> TC:\$6894<br/>                 (\$8273.53), STDC:\$2134 (\$2561.03),<br/>                 WCC:\$762 (\$914.48), PTOC:\$3998<br/>                 (\$4798.03)</p> | <p><u>Quality:</u> medium<br/> <u>Classification:</u> cost<br/>                 description</p> |
|---------------------------------------------------------------------------------------------|------------------------------------------------------------------------------------------------------------------------------------------------------------------------------------------------------------------------------------------------------------------------------------------------------------------------------------------------|------------------------------------------------------------------------------------------------------------------------------------------------------------------------|-----------------------------------------------------------------------------------------------------------------------------------------------------------------------------------------------------------------------------------------------------------------------------------------------------|-----------------------------------------------------------------------------------------------------------------------------------------------------------------------------------------------------------------------------------------------|------------------------------------------------------------------------------------------------------------------------------------------------------------------------------------------------------------------------------------------------------------------------------------------------------------------------------|-------------------------------------------------------------------------------------------------|

1  
2  
3  
4  
5  
6  
7  
8  
9  
10  
11  
12  
13  
14  
15  
16  
17  
18  
19  
20  
21  
22  
23  
24  
25  
26  
27  
28  
29  
30  
31  
32  
33  
34  
35  
36  
37  
38  
39  
40  
41  
42  
43  
44  
45  
46

|                                        |                                                                                                                                                                                    |                                                                                                                                                     |                                                                                                                                                                                          |                                                                                                                       |                                                                                                                                                                                                                                                                                                             |                                                                   |
|----------------------------------------|------------------------------------------------------------------------------------------------------------------------------------------------------------------------------------|-----------------------------------------------------------------------------------------------------------------------------------------------------|------------------------------------------------------------------------------------------------------------------------------------------------------------------------------------------|-----------------------------------------------------------------------------------------------------------------------|-------------------------------------------------------------------------------------------------------------------------------------------------------------------------------------------------------------------------------------------------------------------------------------------------------------|-------------------------------------------------------------------|
| <i>Becker et al</i> [14]<br>2007<br>US | Examine treatment outcomes and costs associated with adherence rates by antipsychotic medication class for Medicaid beneficiaries.                                                 | <u>Design:</u> Retrospective cohort study<br><u>Follow Up:</u> 2 years<br><u>Sample Size:</u> 10330 (>75%:6609, 50-74%:1276, 25-49%:1940, <25%:505) | <u>Measure:</u> prescription refill rate<br><u>Classification:</u> 75-100% = maximal adherence, 50-74.9% = moderate adherence, 25-49.9% = minimal adherence, <25% = negligible adherence | Total Costs                                                                                                           | <u>Type of Costs:</u> unadjusted<br><u>Classification:</u> disease state specific<br><u>Currency Year:</u> USD, 2006<br><u>Cost of Nonadherence*:</u><br>TC(75-100):\$13564 (\$15792.91),<br>TC(50-74):\$13772 (\$16035.09),<br>TC(25-49):\$15792 (\$18387.03),<br>TC(<25):\$16156 (\$18810.84)             | <u>Quality:</u> low<br><u>Classification:</u> cost description    |
| <i>Eddy et al</i> [15]<br>2005<br>US   | To evaluate the effect of partial compliance of patients with prescribed oral atypical and conventional antipsychotic agents and the corresponding impact on resource utilisation. | <u>Design:</u> Retrospective database analysis<br><u>Follow Up:</u> 1 year<br><u>Sample Size:</u> 7864 (<80%:2655, 80-125%:5065, >125%:144)         | <u>Measure:</u> continuous multiple interval medications available<br><u>Classification:</u> <80% = partially compliant, 80-125% = compliant, >125% = overly compliant                   | Inpatient costs<br>Outpatient costs<br>Pharmacy costs<br>Medical costs<br>Physician office visit costs<br>Other costs | <u>Type of Costs:</u> unadjusted<br><u>Classification:</u> disease state specific<br><u>Currency Year:</u> USD, 2002<br><u>Cost of Nonadherence*:</u><br>IC:\$3780 (\$4906.39),<br>OC:\$504 (\$654.19),<br>PC:\$1872 (\$2429.83),<br>MC:\$6228 (\$8083.86),<br>POC:\$1944 (\$2523.29)<br>OtC:\$12 (\$15.58) | <u>Quality:</u> medium<br><u>Classification:</u> cost description |
| <i>Gilmer et al</i> [16]<br>2004       | To evaluate the relationship between                                                                                                                                               | <u>Design:</u> Retrospective database analysis                                                                                                      | <u>Measure:</u> cumulative                                                                                                                                                               | Total costs<br>Outpatient                                                                                             | <u>Type of Costs:</u> adjusted<br><u>Classification:</u> disease state specific                                                                                                                                                                                                                             | <u>Quality:</u> medium<br><u>Classification:</u> cost             |

|    |                 |                         |                              |                        |                 |                                               |                             |
|----|-----------------|-------------------------|------------------------------|------------------------|-----------------|-----------------------------------------------|-----------------------------|
| 1  |                 |                         |                              |                        |                 |                                               |                             |
| 2  |                 |                         |                              |                        |                 |                                               |                             |
| 3  | US              | adherence to            | <u>Follow Up:</u> 1 year     | possession ratio       | costs           | <u>Currency Year:</u> USD, 1999               | description                 |
| 4  |                 | treatment with          | <u>Sample Size:</u> 1619     | <u>Classification:</u> | Pharmacy        | <u>Cost of Nonadherence:</u>                  |                             |
| 5  |                 | antipsychotic           | (<49%:388, 50-               | <49% =                 | costs           | TC:\$8168 (\$11261.74),                       |                             |
| 6  |                 | medication and health   | 79%:259, 80-100%:664,        | nonadherent, 50-       | Hospitalization | OC:\$3464 (\$4776.04),                        |                             |
| 7  |                 | expenditures.           | >110%:308)                   | 79% = partially        | costs           | PC:\$1542 (\$2126.05),                        |                             |
| 8  |                 | Secondary objective     |                              | adherent, 80-          |                 | HC:\$3413 (\$4705.72)                         |                             |
| 9  |                 | was to identify risk    |                              | 100% = adherent,       |                 |                                               |                             |
| 10 |                 | factors predictive of   |                              | >110% = excess         |                 |                                               |                             |
| 11 |                 | non-adherence.          |                              | medication fillers     |                 |                                               |                             |
| 12 |                 |                         |                              | <u>Method of</u>       |                 |                                               |                             |
| 13 |                 |                         |                              | <u>Assessment:</u>     |                 |                                               |                             |
| 14 |                 |                         |                              | pharmacy claims        |                 |                                               |                             |
| 15 |                 |                         |                              | data                   |                 |                                               |                             |
| 16 |                 |                         |                              | <u>Measure:</u>        | Total costs     | <u>Type of Costs:</u> unadjusted              | <u>Quality:</u> medium      |
| 17 |                 |                         |                              | assessed by            | Inpatient costs | <u>Classification:</u> all cause and disease  | <u>Classification:</u> cost |
| 18 | Hong et al[17]  | To investigate clinical | <u>Design:</u> Prospective   | treating               | Outpatient      | state specific                                | description                 |
| 19 | 2011            | and economic            | <u>Follow Up:</u> 21 months  | psychiatrist           | costs           | <u>Currency Year:</u> GBP, 2008               |                             |
| 20 | UK              | consequences of         | <u>Sample Size:</u>          | <u>Classification:</u> | Pharmacy        | <u>Cost of Nonadherence*:</u> all cause:      |                             |
| 21 |                 | medication non-         | 1341(A:1024, NA:317)         | adherent vs.           | costs           | PC:£55.43 (\$94.47)                           |                             |
| 22 |                 | adherence in the        |                              | nonadherent            | Hospitalization | Disease state specific:                       |                             |
| 23 |                 | treatment of bipolar    |                              | <u>Method of</u>       | costs           | TC:£5846.29 (\$9964.10)                       |                             |
| 24 |                 | disorder following a    |                              | <u>Assessment:</u>     |                 | IC:£2740.57 (\$4670.88),                      |                             |
| 25 |                 | manic or mixed          |                              | observational          |                 | OC:£1082.86 (\$1845.57),                      |                             |
| 26 |                 | episode.                |                              | assessment             |                 | PC:£1630.29 (\$2778.58),                      |                             |
| 27 |                 |                         |                              |                        |                 | HC:£337.14 (\$574.60)                         |                             |
| 28 |                 |                         |                              |                        |                 |                                               |                             |
| 29 |                 |                         |                              |                        |                 |                                               |                             |
| 30 |                 |                         |                              |                        |                 |                                               |                             |
| 31 | Jiang et al[18] | To estimate the impact  | <u>Design:</u> Retrospective | <u>Measure:</u> PDC    | Total costs     | <u>Type of Costs:</u> unadjusted              | <u>Quality:</u> low         |
| 32 | 2015            | of adherence to and     | cohort study                 | <u>Classification:</u> | Pharmacy        | <u>Classification:</u> disease state specific | <u>Classification:</u> cost |
| 33 |                 | persistence with        | <u>Follow Up:</u> 2 years    | (PDC≥80% =             | costs           | <u>Currency Year:</u> USD, 2011               | description                 |
| 34 | US              | atypical antipsychotics | <u>Sample Size:</u> 32374    | adherent,              | Medical         | <u>Cost of Nonadherence:</u>                  |                             |
| 35 |                 | on healthcare costs     | (A:11642, NA:20732)          | PDC<80% =              | services costs  | Disease state specific:                       |                             |
| 36 |                 | and risk of             |                              | nonadherent)           |                 | TC:\$14141 (\$14517.37)                       |                             |
| 37 |                 | hospitalization by      |                              | <u>Method of</u>       |                 | PC:\$3971 (\$4076.69),                        |                             |
| 38 |                 | controlling potential   |                              | <u>Assessment:</u>     |                 | MSC:\$10170 (\$10440.68)                      |                             |
| 39 |                 |                         |                              |                        |                 |                                               |                             |
| 40 |                 |                         |                              |                        |                 |                                               |                             |
| 41 |                 |                         |                              |                        |                 |                                               |                             |
| 42 |                 |                         |                              |                        |                 |                                               |                             |
| 43 |                 |                         |                              |                        |                 |                                               |                             |
| 44 |                 |                         |                              |                        |                 |                                               |                             |
| 45 |                 |                         |                              |                        |                 |                                               |                             |
| 46 |                 |                         |                              |                        |                 |                                               |                             |

1  
2  
3  
4  
5  
6  
7  
8  
9  
10  
11  
12  
13  
14  
15  
16  
17  
18  
19  
20  
21  
22  
23  
24  
25  
26  
27  
28  
29  
30  
31  
32  
33  
34  
35  
36  
37  
38  
39  
40  
41  
42  
43  
44  
45  
46

sources of endogeneity

medical and pharmacy claims data

*Joe et al*[19] 2016 South Korea

To investigate the association between psychiatric medication non-compliance and psychiatric and non-psychiatric service utilisation and costs.

Design: Retrospective cohort study  
Follow Up: 1 year  
Sample Size: 7848 (A:2774, NA:2774, P:1956, NP:1956)

Measure: percentage of days of psychiatric prescription (PDP)  
Classification: PDP≥80% = adherent, PDP<80% = nonadherent; persistent = continued medication without interruption ≥ 56 day, non-persistent = at least one medication interruption > 56 days

Total costs

Type of Costs: adjusted  
Classification: all cause and disease state specific  
Currency Year: USD, 2011  
Cost of Nonadherence: all cause: TC:\$4961 (\$5271.40)  
Disease state specific: TC:\$3061 (\$3252.50)

Quality: medium  
Classification: cost outcome description

*Knapp et al*[20] 2004 UK

To assess the relative impact of non-adherence and other factors associated with resource use and costs incurred by people

Design: Retrospective cohort study  
Follow Up: 1 year  
Sample Size: 658 (A:549, NA:109)

Measure: self-report  
Classification: adherent vs. nonadherent  
Method of Assessment: health insurance data

Total costs  
Inpatient costs  
External services costs

Type of Costs: predicted  
Classification: disease state specific  
Currency Year: GBP, 2001  
Cost of Nonadherence: TC:£57580 (\$116434.12)  
IC:£6714 (\$13576.57),

Quality: medium  
Classification: cost analysis

|    |                            |                         |                              |                         |                 |                                               |
|----|----------------------------|-------------------------|------------------------------|-------------------------|-----------------|-----------------------------------------------|
| 1  |                            |                         |                              |                         |                 |                                               |
| 2  |                            |                         |                              |                         |                 |                                               |
| 3  |                            | with schizophrenia.     |                              | <u>Assessment:</u>      |                 | ESC:£1603 (\$3241.47)                         |
| 4  |                            |                         |                              | survey                  |                 |                                               |
| 5  | <i>Offord et al[21]</i>    | To quantify early       | <u>Design:</u> Retrospective | <u>Measure:</u> time to | Total costs     | <u>Type of Costs:</u> adjusted                |
| 6  | 2013                       | nonadherence to         | cohort study                 | discontinuation         | Outpatient      | <u>Classification:</u> all cause and disease  |
| 7  | US                         | antipsychotic           | <u>Follow Up:</u> 1 year     | <u>Classification:</u>  | costs           | state specific                                |
| 8  |                            | medications in patients | <u>Sample Size:</u> 1462     | adherent vs.            | Pharmacy        | <u>Currency Year:</u> USD, 2008               |
| 9  |                            | with schizophrenia and  | (A:589, NA:873)              | nonadherent             | costs           | <u>Cost of Nonadherence:</u> all cause:       |
| 10 |                            | its impact on short-    |                              | <u>Method of</u>        | Hospitalization | TC:\$15400 (\$17132.34)                       |
| 11 |                            | term antipsychotic      |                              | <u>Assessment:</u>      | costs           | OC:\$5773 (\$6422.40),                        |
| 12 |                            | adherence, healthcare   |                              | pharmacy claims         |                 | PC:\$3777 (\$4201.87),                        |
| 13 |                            | utilisation and costs.  |                              | data                    |                 | HC:\$5850 (\$6508.06)                         |
| 14 |                            |                         |                              |                         |                 | Disease state specific:                       |
| 15 |                            |                         |                              |                         |                 | TC:\$5358 (\$5960.72)                         |
| 16 |                            |                         |                              |                         |                 | OC:\$858 (\$954.52),                          |
| 17 |                            |                         |                              |                         |                 | PC:\$1549 (\$1723.25),                        |
| 18 |                            |                         |                              |                         |                 | HC:\$2952 (\$3284.07)                         |
| 19 |                            |                         |                              |                         |                 | <u>Type of Costs:</u> adjusted                |
| 20 |                            |                         |                              |                         |                 | <u>Classification:</u> all cause and disease  |
| 21 | <i>Offord et al[22]</i>    | To examine the impact   | <u>Design:</u> Retrospective | <u>Measure:</u> MPR     | Inpatient       | <u>Quality:</u> low                           |
| 22 | 2013                       | of medication           | cohort study                 | <u>Classification:</u>  | costs           | <u>Classification:</u> cost                   |
| 23 | US                         | adherence on            | <u>Follow Up:</u> 1 year     | MPR ≥ 70= high          | Pharmacy        | description                                   |
| 24 |                            | healthcare utilisation  | <u>Sample Size:</u> 354      | adherence, MPR <        | costs           |                                               |
| 25 |                            | among Medicare          | (A:126, NA:228)              | 70 = low                |                 | <u>Currency Year:</u> USD, 2008               |
| 26 |                            | insured schizophrenia   |                              | adherence               |                 | <u>Cost of Nonadherence:</u> all cause:       |
| 27 |                            | patients.               |                              | <u>Method of</u>        |                 | IC:\$9053 (\$10071.37),                       |
| 28 |                            |                         |                              | <u>Assessment:</u>      |                 | PC:\$4267 (\$4746.99),                        |
| 29 |                            |                         |                              | pharmacy claims         |                 | Disease state specific:                       |
| 30 |                            |                         |                              | data                    |                 | IC:\$2468 (\$2745.62),                        |
| 31 |                            |                         |                              |                         |                 | PC:\$1085 (\$1207.05)                         |
| 32 | <i>Robertson et al[23]</i> | To examine the impact   | <u>Design:</u> Retrospective | <u>Measure:</u> MPR     | Total costs     | <u>Type of Costs:</u> unadjusted              |
| 33 | 2014                       | of the combination of   | cohort study                 | <u>Classification:</u>  | Inpatient costs | <u>Classification:</u> disease state specific |
| 34 | US                         | treatment utilization   | <u>Follow Up:</u> 90 days    | MPR ≥80% =              | Outpatient      | <u>Currency Year:</u> USD,2005                |
| 35 |                            | and medication          | <u>Sample Size:</u> 1376     | adherent                | costs           | <u>Cost of Nonadherence*:</u>                 |
| 36 |                            | possession on arrest    | (90/90:637, 60/90:240,       | <u>Method of</u>        | Emergency       | TC(90/90):\$28068 (\$33495.65),               |
| 37 |                            | and incarceration       | 30/90:174, 0/90:316)         | <u>Assessment:</u>      | department      | TC(60/90):\$21720 (\$25920.11),               |
| 38 |                            | outcomes and on         |                              | Medicaid claims         | costs           | TC(30/90):\$21084 (\$25161.12),               |
| 39 |                            |                         |                              |                         |                 |                                               |
| 40 |                            |                         |                              |                         |                 |                                               |
| 41 |                            |                         |                              |                         |                 |                                               |
| 42 |                            |                         |                              |                         |                 |                                               |
| 43 |                            |                         |                              |                         |                 |                                               |
| 44 |                            |                         |                              |                         |                 |                                               |
| 45 |                            |                         |                              |                         |                 |                                               |
| 46 |                            |                         |                              |                         |                 |                                               |

|    |        |      |               |                                 |
|----|--------|------|---------------|---------------------------------|
| 1  |        |      |               |                                 |
| 2  |        |      |               |                                 |
| 3  | costs. | data | Pharmacy      | TC(0/90):\$12516 (\$14936.28),  |
| 4  |        |      | costs         | IC(90/90):\$12168 (\$14520.99), |
| 5  |        |      | Target case   | IC(60/90):\$10068 (\$12014.90), |
| 6  |        |      | management    | IC(30/90):\$11376 (\$13575.84), |
| 7  |        |      | costs         | IC(0/90):\$5592 (\$6673.35),    |
| 8  |        |      | Psychiatric   | OC(90/90):\$6468 (\$7718.75),   |
| 9  |        |      | assessment    | OC(60/90):\$4152 (\$4954.89),   |
| 10 |        |      | costs         | OC(30/90):\$2916 (\$3479.88),   |
| 11 |        |      | Arrest costs  | OC(0/90):\$2136 (\$2549.05),    |
| 12 |        |      | Incarceration | EDC(90/90):\$96 (\$114.56),     |
| 13 |        |      | costs         | EDC(60/90):\$108 (\$128.88),    |
| 14 |        |      |               | EDC(30/90):\$144 (\$171.85),    |
| 15 |        |      |               | EDC(0/90):\$84 (\$100.24),      |
| 16 |        |      |               | PC(90/90):\$5316 (\$6343.98),   |
| 17 |        |      |               | PC(60/90):\$3468 (\$4138.63),   |
| 18 |        |      |               | PC(30/90):\$2232 (\$2663.61),   |
| 19 |        |      |               | PC(0/90):\$984 (\$1174.28),     |
| 20 |        |      |               | TCMC(90/90):\$2100 (\$2506.09), |
| 21 |        |      |               | TCMC(60/90):\$1404 (\$1675.50), |
| 22 |        |      |               | TCMC(30/90):\$1596 (\$1904.63), |
| 23 |        |      |               | TCMC(0/90):\$516 (\$615.78),    |
| 24 |        |      |               | PAC(90/90):\$240 (\$286.41),    |
| 25 |        |      |               | PAC(60/90):\$228 (\$272.09),    |
| 26 |        |      |               | PAC(30/90):\$204 (\$243.45),    |
| 27 |        |      |               | PAC(0/90):\$156 (\$186.17),     |
| 28 |        |      |               | ArC(90/90):\$780 (\$930.83),    |
| 29 |        |      |               | ArC(60/90):\$1032 (\$1231.56),  |
| 30 |        |      |               | ArC(30/90):\$1140 (\$1360.45),  |
| 31 |        |      |               | ArC(0/90):\$1200 (\$1432.05),   |
| 32 |        |      |               | InC(90/90):\$888 (\$1059.72),   |
| 33 |        |      |               | InC(60/90):\$1272 (\$1517.97),  |
| 34 |        |      |               | InC(30/90):\$1476 (\$1761.42),  |
| 35 |        |      |               | InC(0/90):\$1860 (\$2219.68)    |
| 36 |        |      |               |                                 |
| 37 |        |      |               |                                 |
| 38 |        |      |               |                                 |
| 39 |        |      |               |                                 |
| 40 |        |      |               |                                 |
| 41 |        |      |               |                                 |
| 42 |        |      |               |                                 |
| 43 |        |      |               |                                 |
| 44 |        |      |               |                                 |
| 45 |        |      |               |                                 |
| 46 |        |      |               |                                 |

|    |                            |                        |                              |                            |                 |                                               |
|----|----------------------------|------------------------|------------------------------|----------------------------|-----------------|-----------------------------------------------|
| 1  |                            |                        |                              |                            |                 |                                               |
| 2  |                            |                        |                              |                            |                 |                                               |
| 3  | <i>Robinson et al</i> [24] | To determine if the    | <u>Design:</u> Retrospective | <u>Measure:</u>            | Total costs     | <u>Type of Costs:</u> unadjusted              |
| 4  | 2006                       | type of antidepressant | claims analysis              | Antidepressant             | Inpatient       | <u>Classification:</u> all cause and disease  |
| 5  | US                         | drug is related to     | <u>Follow Up:</u> 6 months   | medication                 | costs           | state specific                                |
| 6  |                            | adherence and assess   | <u>Sample Size:</u> 60386    | management                 | Outpatient      | <u>Currency Year:</u> USD, 2004               |
| 7  |                            | the 6 month health     | (A:11526, NA:8860)           | measures                   | costs           | <u>Cost of Nonadherence*:</u> all cause:      |
| 8  |                            | care costs among       |                              | <u>Classification:</u>     | ED visit costs  | TC:\$12658 (\$15678.21)                       |
| 9  |                            | newly diagnosed        |                              | meeting less than          | Pharmacy        | IC:\$3006 (\$3723.24),                        |
| 10 |                            | patients.              |                              | <3 medication              | costs           | OC:\$6118 (\$7577.76),                        |
| 11 |                            |                        |                              | management                 | Physician       | EDC:\$334 (\$413.69)                          |
| 12 |                            |                        |                              | measures =                 | office visit    | PC:\$3200 (\$3963.52),                        |
| 13 |                            |                        |                              | nonadherent                | costs           | POC:\$178 (\$220.47)                          |
| 14 |                            |                        |                              | <u>Method of</u>           |                 | Disease state specific:                       |
| 15 |                            |                        |                              | <u>Assessment:</u>         |                 | TC:\$2028 (\$2511.88)                         |
| 16 |                            |                        |                              | pharmacy claims            |                 | IC:\$102 (\$126.34),                          |
| 17 |                            |                        |                              | data, Medicaid             |                 | OC:\$734 (\$909.13),                          |
| 18 |                            |                        |                              | data,                      |                 | EDC:\$18 (\$22.29)                            |
| 19 |                            |                        |                              | observational              |                 | PC:\$1174 (\$1454.12),                        |
| 20 |                            |                        |                              | assessment                 |                 | POC:\$120 (\$148.63)                          |
| 21 |                            |                        |                              |                            |                 |                                               |
| 22 |                            |                        |                              |                            |                 |                                               |
| 23 | <i>Svarstad et al</i> [25] | To examine the         | <u>Design:</u> Retrospective | <u>Measure:</u> quarter    | Hospitalization | <u>Type of Costs:</u> unadjusted              |
| 24 | 2001                       | relationship of        | database analysis            | pharmacy claims            | costs           | <u>Classification:</u> all cause and disease  |
| 25 | US                         | medication non-        | <u>Follow Up:</u> 1 year     | <u>Classification:</u> one |                 | state specific                                |
| 26 |                            | adherence to hospital  | <u>Sample Size:</u> 619      | or more quarters           |                 | <u>Currency Year:</u> USD, 1990               |
| 27 |                            | use and costs among    | (A:413, NA:206)              | without a claim =          |                 | <u>Cost of Nonadherence:</u> all cause:       |
| 28 |                            | severely mentally ill  |                              | nonadherent                |                 | HC:\$3992 (\$6593.06)                         |
| 29 |                            | clients.               |                              | <u>Method of</u>           |                 | Disease state specific:                       |
| 30 |                            |                        |                              | <u>Assessment:</u>         |                 | Schizophrenia/schizoaffective disorder:       |
| 31 |                            |                        |                              | pharmacy claims            |                 | HC:\$3421 (\$5650.01)                         |
| 32 |                            |                        |                              | data, previous             |                 | Bipolar disorder:                             |
| 33 |                            |                        |                              | study data                 |                 | HC:\$9701 (\$16021.85),                       |
| 34 |                            |                        |                              |                            |                 | Other severe mental illness:                  |
| 35 |                            |                        |                              |                            |                 | HCD:\$3024 (\$4994.34)                        |
| 36 |                            |                        |                              |                            |                 |                                               |
| 37 |                            |                        |                              |                            |                 |                                               |
| 38 | <i>White et al</i> [26]    | To evaluate the        | <u>Design:</u> Retrospective | <u>Measure:</u> MPR        | Total costs     | <u>Type of Costs:</u> adjusted                |
| 39 | 2003                       | economic impact of     | database analysis            | <u>Classification:</u>     | Pharmacy        | <u>Classification:</u> disease state specific |
| 40 |                            |                        |                              |                            |                 | <u>Quality:</u> medium                        |
| 41 |                            |                        |                              |                            |                 | <u>Classification:</u> cost                   |
| 42 |                            |                        |                              |                            |                 |                                               |
| 43 |                            |                        |                              |                            |                 |                                               |
| 44 |                            |                        |                              |                            |                 |                                               |
| 45 |                            |                        |                              |                            |                 |                                               |
| 46 |                            |                        |                              |                            |                 |                                               |

1  
2  
3  
4  
5  
6  
7  
8  
9  
10  
11  
12  
13  
14  
15  
16  
17  
18  
19  
20  
21  
22  
23  
24  
25  
26  
27  
28  
29  
30  
31  
32  
33  
34  
35  
36  
37  
38  
39  
40  
41  
42  
43  
44  
45  
46

|                                                         |                                                                                                                                                                                                                         |                                                                                                                            |                                                                                                                                              |                                                          |                                                                                                                                                                                                                                             |                                                                         |
|---------------------------------------------------------|-------------------------------------------------------------------------------------------------------------------------------------------------------------------------------------------------------------------------|----------------------------------------------------------------------------------------------------------------------------|----------------------------------------------------------------------------------------------------------------------------------------------|----------------------------------------------------------|---------------------------------------------------------------------------------------------------------------------------------------------------------------------------------------------------------------------------------------------|-------------------------------------------------------------------------|
| US                                                      | antidepressant treatment adherence among patients treated for depression                                                                                                                                                | <u>Follow Up:</u> 6 months<br><u>Sample Size:</u> 14190 (A:5638, NA:8552)                                                  | <u>Measure:</u> MPR≥70% = adherent, MPR<70% = nonadherent<br><u>Method of Assessment:</u> pharmacy claims data                               | costs<br>Medical costs                                   | <u>Currency Year:</u> USD, 1999<br><u>Cost of Nonadherence:</u> TC:\$11815 (\$16290.09)<br>PC:\$1123 (\$1548.35),<br>MC:\$10692 (\$14741.74)                                                                                                | description                                                             |
| <b>Diabetes</b><br><i>An et al[27]</i><br>2014<br>Korea | This study evaluated the association between medication adherence and clinical/economic outcomes in patients with type II diabetes mellitus in the republic of Korea over 3 year period.                                | <u>Design:</u> Prospective cohort study<br><u>Follow Up:</u> 3 years<br><u>Sample Size:</u> 608 (A:472, NA:136)            | <u>Measure:</u> MPR<br><u>Classification:</u> MPR≥90% = adherent, MPR<90% = nonadherent<br><u>Method of Assessment:</u> pharmacy claims data | Total costs<br>Outpatient costs<br>Hospitalization costs | <u>Type of Costs:</u> unadjusted<br><u>Classification:</u> disease state specific<br><u>Currency Year:</u> USD, 2007<br><u>Cost of Nonadherence*:</u> TC:\$1657.11 (\$1884.14)<br>OC: \$1413.99 (\$1608.20),<br>HC: \$243.11 (\$276.12)     | <u>Quality:</u> medium<br><u>Classification:</u> cost description       |
| <i>Egede et al[28]</i><br>2012<br>US                    | To examine the longitudinal effects of medication nonadherence on key costs and estimate potential savings from increased adherence using novel methodology that accounts for shared correlation among cost categories. | <u>Design:</u> Retrospective cohort study<br><u>Follow Up:</u> 5 years<br><u>Sample Size:</u> 740195 (A:427390, NA:312805) | <u>Measure:</u> MPR<br><u>Classification:</u> MPR≥80% = adherent, MPR<80% = nonadherent<br><u>Method of Assessment:</u> pharmacy claims data | Inpatient costs<br>Outpatient costs<br>Pharmacy costs    | <u>Type of Costs:</u> unadjusted<br><u>Classification:</u> disease state specific<br><u>Currency Year:</u> USD, 2006<br><u>Cost of Nonadherence*:</u> IC:\$14515.24 (\$17886.40)<br>OC: \$3599.27 (\$4434.16),<br>PC: \$1073.12 (\$1322.42) | <u>Quality:</u> high<br><u>Classification:</u> cost outcome description |
| Gentil et al[29]<br>2015                                | To examine healthcare costs associated with                                                                                                                                                                             | <u>Design:</u> Retrospective, observational cohort                                                                         | <u>Measure:</u> MPR<br><u>Classification:</u>                                                                                                | Total costs<br>Inpatient costs                           | <u>Type of Costs:</u> adjusted and unadjusted<br><u>Classification:</u> all cause and disease                                                                                                                                               | <u>Quality:</u> medium<br><u>Classification:</u> cost                   |



|    |                         |                        |                               |                        |               |                                               |
|----|-------------------------|------------------------|-------------------------------|------------------------|---------------|-----------------------------------------------|
| 1  |                         |                        |                               |                        |               |                                               |
| 2  |                         |                        |                               |                        |               |                                               |
| 3  | Canada                  | adherence to oral      | analysis                      | MPR $\geq$ 80% =       | Outpatient    | state specific                                |
| 4  |                         | antihyperglycemic      | <u>Follow Up:</u> 1 year      | adherent,              | costs         | <u>Currency Year:</u> CAD, 2010               |
| 5  |                         | agents and the effects | <u>Sample Size:</u> 301       | MPR<80% =              | Pharmacy      | <u>Cost of Nonadherence:</u>                  |
| 6  |                         | of depression and      | (A:224, NA:77)                | nonadherent            | costs         | Adjusted all cause:                           |
| 7  |                         | anxiety disorders on   |                               | <u>Method of</u>       | Physician     | TC:\$11124 (\$9818.67),                       |
| 8  |                         | these in older adults  |                               | <u>Assessment:</u>     | office visit  | IC:\$7419 (\$6548.43)                         |
| 9  |                         | with type 2 diabetes   |                               | pharmacy claims        | costs         | OC: \$2687 (\$2371.70),                       |
| 10 |                         |                        |                               | data                   |               | PC: \$504 (\$444.86),                         |
| 11 |                         |                        |                               |                        |               | POC:\$513 (\$452.80)                          |
| 12 |                         |                        |                               |                        |               | Adjusted disease state specific:              |
| 13 |                         |                        |                               |                        |               | TC:\$4477 (\$3951.65),                        |
| 14 |                         |                        |                               |                        |               | IC:\$2836 (\$2503.21)                         |
| 15 |                         |                        |                               |                        |               | OC: \$1518 (\$1339.87),                       |
| 16 |                         |                        |                               |                        |               | PC <sup>###</sup> : \$-444 (\$-391.90),       |
| 17 |                         |                        |                               |                        |               | POC:\$568 (\$517.24)                          |
| 18 |                         |                        |                               |                        |               | Unadjusted all cause:                         |
| 19 |                         |                        |                               |                        |               | TC:\$14979 (\$13221.30),                      |
| 20 |                         |                        |                               |                        |               | IC:\$6351 (\$5605.75)                         |
| 21 |                         |                        |                               |                        |               | OC: \$4058 (\$3581.82),                       |
| 22 |                         |                        |                               |                        |               | PC: \$3503 (\$3091.94),                       |
| 23 |                         |                        |                               |                        |               | POC:\$1066 (\$940.91)                         |
| 24 |                         |                        |                               |                        |               | Unadjusted disease state specific:            |
| 25 |                         |                        |                               |                        |               | TC:\$9008 (\$7950.97),                        |
| 26 |                         |                        |                               |                        |               | IC:\$2854 (\$2519.10)                         |
| 27 |                         |                        |                               |                        |               | OC: \$2654 (\$2342.57),                       |
| 28 |                         |                        |                               |                        |               | PC: \$2498 (\$2204.87),                       |
| 29 |                         |                        |                               |                        |               | POC:\$1002 (\$884.42)                         |
| 30 |                         |                        |                               |                        |               | <u>Type of Costs:</u> adjusted and unadjusted |
| 31 |                         |                        |                               |                        |               | <u>Classification:</u> all cause and disease  |
| 32 |                         |                        |                               |                        |               | state specific                                |
| 33 | <i>Hagen et al</i> [30] | To evaluate the        | <u>Design:</u> Retrospective, | <u>Measure:</u> PDC    | Healthcare    | <u>Quality:</u> medium                        |
| 34 | 2014                    | relationships between  | observational cohort          | <u>Classification:</u> | costs         | <u>Classification:</u> cost                   |
| 35 | US                      | compliance with oral   | analysis                      | PDC $\geq$ 80% =       | Pharmacy      | state specific                                |
| 36 |                         | hypoglycemic agents    | <u>Follow Up:</u> 1 year      | compliant,             | costs         | <u>Currency Year:</u> USD, 2003               |
| 37 |                         | and healthcare/ short  | <u>Sample Size:</u> 4978      | PDC<80% =              | Medical costs | <u>Cost of Nonadherence:</u> Adjusted all     |
| 38 |                         | term disability costs  | (A:2820, NA:2158)             | noncompliant           | Short term    | cause:                                        |
| 39 |                         |                        |                               |                        |               |                                               |
| 40 |                         |                        |                               |                        |               |                                               |
| 41 |                         |                        |                               |                        |               |                                               |
| 42 |                         |                        |                               |                        |               |                                               |
| 43 |                         |                        |                               |                        |               |                                               |
| 44 |                         |                        |                               |                        |               |                                               |
| 45 |                         |                        |                               |                        |               |                                               |
| 46 |                         |                        |                               |                        |               |                                               |

1  
2  
3  
4  
5  
6  
7  
8  
9  
10  
11  
12  
13  
14  
15  
16  
17  
18  
19  
20  
21  
22  
23  
24  
25  
26  
27  
28  
29  
30  
31  
32  
33  
34  
35  
36  
37  
38  
39  
40  
41  
42  
43  
44  
45  
46

|                                               |                                                                                                                                                                                                                                                                                                                   |                                                                                                                           |                                                                                                                                                       |                                                                                 |                                                                                                                                                                                                                                                                                                                                                                                                                                                                                                                                                                              |                                                                   |
|-----------------------------------------------|-------------------------------------------------------------------------------------------------------------------------------------------------------------------------------------------------------------------------------------------------------------------------------------------------------------------|---------------------------------------------------------------------------------------------------------------------------|-------------------------------------------------------------------------------------------------------------------------------------------------------|---------------------------------------------------------------------------------|------------------------------------------------------------------------------------------------------------------------------------------------------------------------------------------------------------------------------------------------------------------------------------------------------------------------------------------------------------------------------------------------------------------------------------------------------------------------------------------------------------------------------------------------------------------------------|-------------------------------------------------------------------|
|                                               |                                                                                                                                                                                                                                                                                                                   |                                                                                                                           | <u>Method of Assessment:</u><br>pharmacy claims data                                                                                                  | disability costs                                                                | PC: \$1668 (\$2065.99),<br>Adjusted disease state specific:<br>HC:\$7642 (\$9465.39), PC:\$614 (\$760.50), MC:\$5974 (\$7399.40),<br>STDC:\$1840 (\$2279.03)<br>Unadjusted all cause:<br>PC:\$1727 (\$2139.06)<br>Unadjusted disease state specific:<br>HC:\$6919 (\$8569.88), PC:\$785 (\$972.30), MC:\$5192 (\$6430.82),<br>STDC:\$1717 (\$2126.68)                                                                                                                                                                                                                        |                                                                   |
| <i>Hansen et al</i> [31]<br>2010<br>US        | To compare all cause total health care costs and diabetes mellitus specific health care costs between patients who were adherent or non-adherent to monotherapy with metformin, pioglitazone or a sulfonylurea and to examine whether cost differences varied among patients using these oral antidiabetic drugs. | <u>Design:</u> Retrospective, cohort study<br><u>Follow Up:</u> 2 years<br><u>Sample Size:</u> 108592 (A:63830, NA:44762) | <u>Measure:</u> MPR<br><u>Classification:</u><br>MPR≥80% = adherent,<br>MPR<80% = nonadherent<br><u>Method of Assessment:</u><br>pharmacy claims data | Total Healthcare costs<br>Inpatient costs<br>Outpatient costs<br>Pharmacy costs | <u>Type of Costs:</u> adjusted and unadjusted<br><u>Classification:</u> all cause and disease state specific<br><u>Currency Year:</u> USD, 2005<br><u>Cost of Nonadherence#:</u> Adjusted all cause:<br>THC:\$13258 (\$15911.01)<br>Adjusted disease state specific:<br>THC:\$2284 (\$2741.04)<br>Unadjusted all cause:<br>THC:\$15448.50 (\$18539.90),<br>IC:\$4242.33 (\$5091.25),<br>OC:\$ 7377.83, PC:\$3828 (\$4594.01)<br>Unadjusted disease state specific:<br>THC:\$3232.33 (\$3879.15), IC:\$873.50 (\$1048.29), OC:\$1545.67(\$1854.96),<br>PC:\$812.67 (\$975.29) | <u>Quality:</u> medium<br><u>Classification:</u> cost description |
| <i>Hong et al</i> [32]<br>2011<br>South Korea | To assess the relationship between initial adherence to oral antihyperglycemic medications and                                                                                                                                                                                                                    | <u>Design:</u> Retrospective, cohort study<br><u>Follow Up:</u> 3 years<br><u>Sample Size:</u> 40082 (A:11800, NA:28282)  | <u>Measure:</u> MPR<br><u>Classification:</u><br>MPR≥80% = adherent,<br>MPR<80% =                                                                     | Total costs<br>Hospitalization costs                                            | <u>Type of Costs:</u> unadjusted<br><u>Classification:</u> disease state specific<br><u>Currency Year:</u> KRW, 2007<br><u>Cost of Nonadherence:</u><br>TC:₩765453 (\$1142.31),                                                                                                                                                                                                                                                                                                                                                                                              | <u>Quality:</u> medium<br><u>Classification:</u> cost description |

subsequent health outcomes.

nonadherent

HC: \$397549 (\$593.28)

Method of

Assessment:

pharmacy claims data

*Jha et al*[33]  
2012  
US

How often do previously non-adherent patients become adherent and vice versa?

Design: Retrospective, observational claims analysis

Follow Up: unclear

Sample Size: 135639

(A:99976, NA:36553)

Measure: MPR

Classification:

MPR $\geq$ 80% =

adherent,

MPR<80% =

nonadherent

Method of

Assessment:

pharmacy claims data

Total costs

ED costs

Hospitalization costs

Type of Costs: adjusted

Classification: disease state specific

Currency Year: USD, 2011

Cost of Nonadherence<sup>\*\*\*</sup>:

TC:\$4680000000 (\$5006563305.49),

EDC:\$735000000 (\$786287185.80),

HC:\$3950000000 (\$4225625012.11)

Quality: high

Classification: cost

outcome

description

*White et al*[34]  
2004  
US

To assess the relationship between diabetic medication adherence, total

Design: Retrospective, database analysis

Follow Up: 1 year

Sample Size: 67029

Measure: MPR

Classification:

MPR $\geq$ 95%,

MPR>75%<95%,

Total costs

Pharmacy costs

costs

Non-pharmacy

Type of Costs: adjusted and unadjusted

Classification: disease state specific

Currency Year: USD, 2000

Cost of Nonadherence: adjusted:

Quality: low

Classification: cost

analysis

1  
2  
3  
4  
5  
6  
7  
8  
9  
10  
11  
12  
13  
14  
15  
16  
17  
18  
19  
20  
21  
22  
23  
24  
25  
26  
27  
28  
29  
30  
31  
32  
33  
34  
35  
36  
37  
38  
39  
40  
41  
42  
43  
44  
45  
46

healthcare costs and utilisation with patients with type 2 diabetes mellitus and concomitant diabetes and cardiovascular disease.

(>95:20170, 75-95: 14074, <75:16713)

MPR<75%  
Method of Assessment:  
pharmacy claims data

costs

TC(≥95):\$4835 (\$6518.17),  
TC(75-95):\$5314 (\$7163.92),  
TC(<75):\$5706 (\$7692.38),  
PC(≥95):\$1429 (\$1926.47),  
PC(75-95):\$1157 (\$1559.78),  
PC(<75):\$762 (\$1027.27),  
NPC(≥95):\$3406 (\$4591.70),  
NPC(75-95):\$4157 (\$5604.14),  
NPC(<75):\$4944 (\$6665.11)  
Unadjusted:  
TC(≥95):\$4809 (\$6483.12),  
TC(75-95):\$5333 (\$7189.53),  
TC(<75):\$5605 (\$7556.22),  
PC(≥95):\$1402 (\$1890.07),  
PC(75-95):\$1153 (\$1554.38),  
PC(<75):\$766 (\$1032.66),  
NPC(≥95):\$3407 (\$4593.05),  
NPC(75-95):\$4180 (\$5635.15),  
NPC(<75):\$4839 (\$6523.56)

*Wu et al*[35]  
2009  
US

To examine the predictors of duloxetine compliance and its association with healthcare costs among diabetic peripheral neuropathic pain (DPNP) patients.

Design: Retrospective, cohort study  
Follow Up: 1 year  
Sample Size: 2354 (A:830, NA:1524)

Measure: MPR  
Classification:  
MPR≥80%= high compliance,  
MPR<80% = low compliance  
Subgroup  
Analysis:  
commercial and Medicare supplemental  
Method of Assessment:  
pharmacy claims

Total healthcare costs  
Inpatient costs  
Outpatient costs  
Pharmacy costs

Type of Costs: adjusted  
Classification: all cause and disease state specific  
Currency Year: USD, 2006  
Cost of Nonadherence: adjusted all cause:  
THC(com):\$32407 (\$37732.29),  
THC(med):\$24622 (\$28668.02),  
IC(com):\$ 12851(\$14692.74),  
IC(med):\$ 6754 (\$7863.85),  
OC(com):\$11888 (\$13841.50),  
OC(med):\$10598 (\$12339.52),  
PC(com):\$7667 (\$8926.88),  
PC(med):\$7270 (\$8464.65)

Quality: medium  
Classification: cost description

data

Adjusted disease state specific:

Diabetes:

THC(com):\$10024 (\$11671.20),

THC(med):\$5015 (\$5839.09),

IC(com):\$2232 (\$2598.77),

IC(med):\$2606 (\$3034.23),

OC(com):\$1989 (\$2315.84),

OC(med):\$1231 (\$1433.28),

PC(com):\$1451 (\$1689.44),

PC(med):\$1179 (\$1372.74)

DPNP:

THC(com):\$3565 (\$4150.82),

THC(med):\$2384 (\$2775.75),

IC(com):\$1739 (\$2024.76),

IC(med):\$1048 (\$1220.21),

OC(com):\$362 (\$421.49),

OC(med):\$181 (\$210.74),

PC(com):\$1464 (\$1704.57)

PC(med):\$1155 (\$1344.80)

**Osteoporosis**

*Briesacher et al*[36]  
2007  
US

To assess rates of osteoporotic fractures and health care utilisation as a function of bisphosphonate compliance in usual clinical practice.

Design: Retrospective, cohort study  
Follow Up: 3 years  
Sample Size: 17988 (not specified)

Measure: MPR  
Classification: 80-100% = adherent, 60-79% = moderate adherence, 40-59% = moderate adherence, 20-39% = nonadherent, 0-19% = nonadherent  
Method of

Total costs  
Inpatient costs  
Outpatient costs  
Pharmacy costs

Type of Costs: adjusted and unadjusted  
Classification: disease state specific  
Currency Year: USD, 2004  
Cost of Nonadherence\*\*\*\*: adjusted:  
TC(80-100):-\$859 (-\$1063.96),  
TC(60-79):-\$474 (-\$587.10),  
TC(40-59):-\$366 (-\$453.33),  
TC(20-39):\$151 (\$187.03),  
IC(80-100):-\$3233 (-\$4004.40),  
IC(60-79):-\$856(-\$1060.24),  
IC(40-59):-\$6221 (-\$7705.34),  
IC(20-39):-\$585 (-\$724.58),  
OC(80-100):-\$445 (-\$551.18),

Quality: medium  
Classification: cost description

Assessment:pharmacy claims  
data

OC(60-79):-\$538 (-\$666.37),

OC(40-59):-\$236 (-\$292.31),

OC(20-39):\$60 (\$74.32),

PC(80-100):\$997 (\$1234.89),

PC(60-79):\$923 (\$1143.23),

PC(40-59):\$402 (\$497.92),

PC(20-39):\$160(\$198.18)

Unadjusted:

TC(80-100):-\$1273 (-\$1576.74),

TC(60-79):-\$294 (-\$364.15),

TC(40-59):-\$573 (-\$709.72),

TC(20-39):\$101 (\$125.10),

IC(80-100):-\$883 (-\$1093.68),

IC(60-79):-\$384 (-\$475.62),

IC(40-59):-\$597 (-\$739.44),

IC(20-39):-\$93 (-\$115.19),

OC(80-100):-\$774 (-\$958.68),

OC(60-79):-\$193 (-\$239.05),

OC(40-59):-\$145 (-\$179.60),

OC(20-39):\$148 (\$183.31),

PC(80-100):\$384 (\$475.62),

PC(60-79):\$284 (\$351.76),

PC(40-59):\$170 (\$210.56),

PC(20-39):\$48 (\$59.45)

*Eisenberg et al*[37]

2015

US

To determine  
healthcare outcomes  
associated with  
compliance and  
noncompliance to  
bisphosphonate  
therapy in women  
diagnosed with  
osteoporosisDesign: Retrospective  
claims studyFollow Up: 2 yearsSample Size: 27905

(A:11368, NA:16537)

Measure: MPRClassification:

(≥70% =

compliant, &lt;70%

= noncompliant

Method ofAssessment:pharmacy claims  
data

Total costs

Inpatient costs

Outpatient

costs

ED costs

Pharmacy

costs

Physician

office visit

Type of Costs: unadjustedClassification: all cause and disease

state specific

Currency Year: USD, 2012Cost of Nonadherence: all cause:

TC:\$7237 (\$7550.72),

IC:\$1986 (\$2072.09),

OC:\$2057 (\$2146.17),

EDC:\$258 (\$269.18),

Quality: mediumClassification: cost

description

|    |                                   |                        |                              |                        |                 |                                                   |                             |
|----|-----------------------------------|------------------------|------------------------------|------------------------|-----------------|---------------------------------------------------|-----------------------------|
| 1  |                                   |                        |                              |                        |                 |                                                   |                             |
| 2  |                                   |                        |                              |                        |                 |                                                   |                             |
| 3  |                                   |                        |                              |                        | costs           | PC:\$2197 (\$2292.24),                            |                             |
| 4  |                                   |                        |                              |                        |                 | POC:\$738 (\$769.99)                              |                             |
| 5  |                                   |                        |                              |                        |                 | Disease state specific:                           |                             |
| 6  |                                   |                        |                              |                        |                 | TC:\$674 (\$703.22),                              |                             |
| 7  |                                   |                        |                              |                        |                 | IC:\$334 (\$348.48),                              |                             |
| 8  |                                   |                        |                              |                        |                 | OC:\$77 (\$80.34),                                |                             |
| 9  |                                   |                        |                              |                        |                 | EDC:\$5 (\$5.22),                                 |                             |
| 10 |                                   |                        |                              |                        |                 | PC:\$213 (\$222.23),                              |                             |
| 11 |                                   |                        |                              |                        |                 | POC:\$44 (\$45.91)                                |                             |
| 12 |                                   |                        |                              |                        |                 |                                                   |                             |
| 13 | <i>Halpern et al</i> [38]         | To examine the         | <u>Design:</u> Retrospective | <u>Measure:</u> MPR    | Medical costs   | <u>Type of Costs:</u> unadjusted                  | <u>Quality:</u> medium      |
| 14 | 2011                              | associations of        | analysis                     | <u>Classification:</u> |                 | <u>Classification:</u> all cause                  | <u>Classification:</u> cost |
| 15 | US                                | adherence to           | <u>Follow Up:</u> 540 days   | (≥80% = high           |                 | <u>Currency Year:</u> USD, 2006                   | outcome                     |
| 16 |                                   | osteoporosis therapies | <u>Sample Size:</u> 21655    | adherence,             |                 | <u>Cost of Nonadherence:</u> commercial:          | description                 |
| 17 |                                   | with occurrence of     | (≥80%:8759,                  | ≥50<80% =              |                 | MC(≥80):\$4295 (\$5000.78),                       |                             |
| 18 |                                   | closed fracture, all   | ≥50<80%:5237,                | moderate               |                 | MC(50-80):\$4697 (\$5468.84),                     |                             |
| 19 |                                   | cause medical costs    | <50%:7659)                   | adherence, <50%        |                 | MC(<50):\$5596 (\$6515.56)                        |                             |
| 20 |                                   | and all cause          |                              | = low adherence        |                 | Medicare:                                         |                             |
| 21 |                                   | hospitalizations.      |                              | <u>Method of</u>       |                 | MC(≥80):\$4590 (\$5344.25),                       |                             |
| 22 |                                   |                        |                              | <u>Assessment:</u>     |                 | MC(50-80):\$5536 (\$6445.71),                     |                             |
| 23 |                                   |                        |                              | pharmacy claims        |                 | MC(<50):\$5801 (\$6754.25)                        |                             |
| 24 |                                   |                        |                              | data                   |                 |                                                   |                             |
| 25 |                                   |                        |                              |                        |                 |                                                   |                             |
| 26 |                                   |                        |                              |                        |                 |                                                   |                             |
| 27 | <i>Hazel-Fernandez et al</i> [39] | To evaluate the        | <u>Design:</u> Retrospective | <u>Measure:</u> PDC    | Total           | <u>Type of Costs:</u> unadjusted                  | <u>Quality:</u> medium      |
| 28 | 2013                              | healthcare utilisation | cohort study                 | <u>Classification:</u> | healthcare      | <u>Classification:</u> disease state specific and | <u>Classification:</u> cost |
| 29 | US                                | patterns of medicare   | <u>Follow Up:</u> 12 months  | (≥80% = high           | costs           | fracture related                                  | outcome                     |
| 30 |                                   | part D beneficiaries   | <u>Sample Size:</u> 761      | adherence,             | Inpatient costs | <u>Currency Year:</u> USD, 2010                   | description                 |
| 31 |                                   | newly initiating       | (≥80%:163,                   | ≥50<80% =              | Outpatient      | <u>Cost of Nonadherence*:</u>                     |                             |
| 32 |                                   | teriparatide and to    | ≥50<80%:57,                  | moderate               | costs           | Disease state specific:                           |                             |
| 33 |                                   | assess the association | <50%:541)                    | adherence, <50%        | ED costs        | THC(≥80):\$21033 (\$22942.39),                    |                             |
| 34 |                                   | of medication          |                              | = low adherence        | Pharmacy        | THC(50-80):\$25574 (\$27895.62),                  |                             |
| 35 |                                   | adherence and          |                              | <u>Method of</u>       | costs           | THC(<50):\$15528 (\$16937.64),                    |                             |
| 36 |                                   | persistence with bone  |                              | <u>Assessment:</u>     |                 | IC(≥80):\$2198 (\$2397.54),                       |                             |
| 37 |                                   | fracture.              |                              | pharmacy claims        |                 | IC(50-80):\$8448 (\$9214.91),                     |                             |
| 38 |                                   |                        |                              | data                   |                 | IC(<50):\$4897 (\$5341.55),                       |                             |
| 39 |                                   |                        |                              |                        |                 |                                                   |                             |
| 40 |                                   |                        |                              |                        |                 |                                                   |                             |
| 41 |                                   |                        |                              |                        |                 |                                                   |                             |
| 42 |                                   |                        |                              |                        |                 |                                                   |                             |
| 43 |                                   |                        |                              |                        |                 |                                                   |                             |
| 44 |                                   |                        |                              |                        |                 |                                                   |                             |
| 45 |                                   |                        |                              |                        |                 |                                                   |                             |
| 46 |                                   |                        |                              |                        |                 |                                                   |                             |

1  
2  
3  
4  
5  
6  
7  
8  
9  
10  
11  
12  
13  
14  
15  
16  
17  
18  
19  
20  
21  
22  
23  
24  
25  
26  
27  
28  
29  
30  
31  
32  
33  
34  
35  
36  
37  
38  
39  
40  
41  
42  
43  
44  
45  
46

For peer review only

OC(≥80):\$5151 (\$5618.61),  
OC(50-80):\$6439 (\$7023.54),  
OC(<50):\$5806 (\$6333.07),  
EDC(≥80):\$211 (\$230.15),  
EDC(50-80):\$330 (\$359.96),  
EDC(<50):\$465 (\$507.21),  
PC(≥80):\$13472 (\$14695),  
PC(50-80):\$10358 (\$11298.31),  
PC(<50):\$4361 (\$4756.89)  
Fracture related:  
THC(≥80):\$12670 (\$13820.19),  
THC(50-80):\$9292 (\$10135.53),  
THC(<50):\$4419 (\$4820.16),  
IC(≥80):\$366 (\$399.23),  
IC(50-80):\$830 (\$905.35),  
IC(<50):\$1325 (\$1445.28),  
OC(≥80):\$1048 (\$1143.14),  
OC(50-80):\$955 (\$1041.70),  
OC(<50):\$767 (\$836.63),  
EDC(≥80):\$6 (\$6.54),  
EDC(50-80):\$9 (\$9.82),  
EDC(<50):\$44 (\$47.99),  
PC(≥80):\$10810 (\$11791.34),  
PC(50-80):\$7420 (\$8093.59),  
PC(<50):\$2068 (\$2255.73)

|                                                               |                                                                                                                                                  |                                                                                                                                 |                                                                                                                                                   |                                                              |                                                                                                                                                                                                                                                   |                                                                        |
|---------------------------------------------------------------|--------------------------------------------------------------------------------------------------------------------------------------------------|---------------------------------------------------------------------------------------------------------------------------------|---------------------------------------------------------------------------------------------------------------------------------------------------|--------------------------------------------------------------|---------------------------------------------------------------------------------------------------------------------------------------------------------------------------------------------------------------------------------------------------|------------------------------------------------------------------------|
| <p><i>Huybrechts et al</i><sup>[40]</sup><br/>2006<br/>US</p> | <p>To evaluate non-compliance with osteoporosis medications as well as its implications for health and economic outcomes in actual practice.</p> | <p><u>Design:</u> Retrospective cohort study<br/><u>Follow Up:</u> 5 years<br/><u>Sample Size:</u> 38120 (A:9530, NA:28590)</p> | <p><u>Measure:</u> MPR<br/><u>Classification:</u> (≥80% = compliant, &lt;50% = noncompliant)<br/><u>Method of Assessment:</u> pharmacy claims</p> | <p>Total costs<br/>Medical costs<br/>Institutional costs</p> | <p><u>Type of Costs:</u> unadjusted<br/><u>Classification:</u> disease state specific<br/><u>Currency Year:</u> USD, 2000<br/><u>Cost of Nonadherence:</u><br/>TC:\$7200 (\$9706.44),<br/>MC:\$1476 (\$1989.84),<br/>InstC:\$5736 (\$7732.80)</p> | <p><u>Quality:</u> low<br/><u>Classification:</u> cost description</p> |
|---------------------------------------------------------------|--------------------------------------------------------------------------------------------------------------------------------------------------|---------------------------------------------------------------------------------------------------------------------------------|---------------------------------------------------------------------------------------------------------------------------------------------------|--------------------------------------------------------------|---------------------------------------------------------------------------------------------------------------------------------------------------------------------------------------------------------------------------------------------------|------------------------------------------------------------------------|



|    |                           |                         |                              |                        |                 |                                               |
|----|---------------------------|-------------------------|------------------------------|------------------------|-----------------|-----------------------------------------------|
| 1  |                           |                         |                              |                        |                 |                                               |
| 2  |                           |                         |                              |                        |                 |                                               |
| 3  |                           |                         | data                         |                        |                 |                                               |
| 4  | <i>Kjellberget al[41]</i> | To estimate the rate of | <u>Design:</u> Retrospective | <u>Measure:</u> MPR    | Total costs     | <u>Type of Costs:</u> adjusted                |
| 5  | 2016                      | oral bisphosphonate     | cohort study                 | <u>Classification:</u> | Medical costs   | <u>Classification:</u> all cause and disease  |
| 6  | Denmark                   | compliance among        | <u>Follow Up:</u> 1 year     | (≥70% =                |                 | state specific                                |
| 7  |                           | Danish women and to     | <u>Sample Size:</u> 38234    | compliant, <70%        |                 | <u>Currency Year:</u> Euro, 2011              |
| 8  |                           | examine the             | (A:26806, NA:11428)          | = noncompliant)        |                 | <u>Cost of Nonadherence:</u> all cause:       |
| 9  |                           | association of          |                              | <u>Method of</u>       |                 | TC:€4933 (\$6209.58),                         |
| 10 |                           | noncompliance with      |                              | <u>Assessment:</u>     |                 | MC:€3471 (\$4369.20),                         |
| 11 |                           | health care resource    |                              | pharmacy claims        |                 | Disease state specific:                       |
| 12 |                           | use and cost.           |                              | data                   |                 | TC:€754 (\$949.12),                           |
| 13 |                           |                         |                              |                        |                 | MC:€426 (\$536.24),                           |
| 14 |                           |                         |                              |                        |                 |                                               |
| 15 | <i>Modi et al[42]</i>     | To evaluate             | <u>Design:</u> Retrospective | <u>Measure:</u> MPR    | Total costs     | <u>Type of Costs:</u> unadjusted              |
| 16 | 2015                      | compliance with         | cohort study                 | <u>Classification:</u> | Inpatient costs | <u>Classification:</u> all cause and disease  |
| 17 | US                        | osteoporosis            | <u>Follow Up:</u> 1 year     | (≥80% =                | Outpatient      | state specific                                |
| 18 |                           | treatments and          | <u>Sample Size:</u> 27913    | compliant, <80%        | costs           | <u>Currency Year:</u> USD, 2011               |
| 19 |                           | determine fracture and  | (A:23430, NA:34483)          | = noncompliant)        | ED costs        | <u>Cost of Nonadherence:</u> all cause:       |
| 20 |                           | healthcare burden       |                              | <u>Method of</u>       | Pharmacy        | TC:\$11749 (\$12484.12),                      |
| 21 |                           | associated with         |                              | <u>Assessment:</u>     | costs           | IC:\$8768 (\$9316.60),                        |
| 22 |                           | noncompliance           |                              | healthcare claims      | Medical costs   | OC:\$3945 (\$4191.83),                        |
| 23 |                           |                         |                              | data                   | Other costs     | EDC:\$104 (\$110.51),                         |
| 24 |                           |                         |                              |                        |                 | PC:\$2981 (\$3167.52),                        |
| 25 |                           |                         |                              |                        |                 | MC:\$8768 (\$9316.60),                        |
| 26 |                           |                         |                              |                        |                 | OtC:\$997 (\$1059.38)                         |
| 27 |                           |                         |                              |                        |                 | Disease state specific:                       |
| 28 |                           |                         |                              |                        |                 | TC:\$630 (\$669.42),                          |
| 29 |                           |                         |                              |                        |                 | IC:\$443 (\$470.72),                          |
| 30 |                           |                         |                              |                        |                 | OC:\$158 (\$167.89),                          |
| 31 |                           |                         |                              |                        |                 | EDC:\$3 (\$3.19),                             |
| 32 |                           |                         |                              |                        |                 | PC:\$325 (\$345.33),                          |
| 33 |                           |                         |                              |                        |                 | OtC:\$26 (\$27.63)                            |
| 34 |                           |                         |                              |                        |                 |                                               |
| 35 |                           |                         |                              |                        |                 |                                               |
| 36 |                           |                         |                              |                        |                 |                                               |
| 37 | <i>Olsen et al[43]</i>    | To assess the           | <u>Design:</u> Retrospective | <u>Measure:</u> MPR    | Fracture costs  | <u>Type of Costs:</u> unadjusted              |
| 38 | 2013                      | association between     | observational study          | <u>Classification:</u> |                 | <u>Classification:</u> fracture site specific |
| 39 | Denmark                   | refill compliance and   | <u>Follow Up:</u> 2 years    | (≥80% = optimal)       |                 | <u>Currency Year:</u> DKK, 2010               |
| 40 |                           |                         |                              |                        |                 | <u>Quality:</u> medium                        |
| 41 |                           |                         |                              |                        |                 | <u>Classification:</u> cost                   |
| 42 |                           |                         |                              |                        |                 | analysis                                      |
| 43 |                           |                         |                              |                        |                 |                                               |
| 44 |                           |                         |                              |                        |                 |                                               |
| 45 |                           |                         |                              |                        |                 |                                               |
| 46 |                           |                         |                              |                        |                 |                                               |

1  
2  
3  
4  
5  
6  
7  
8  
9  
10  
11  
12  
13  
14  
15  
16  
17  
18  
19  
20  
21  
22  
23  
24  
25  
26  
27  
28  
29  
30  
31  
32  
33  
34  
35  
36  
37  
38  
39  
40  
41  
42  
43  
44  
45  
46

all cause health care costs.

Sample Size: 47176 (not specified)

compliance, >50<80% = suboptimal compliance, <50% = low compliance  
Method of Assessment: pharmacy claims data

Cost of Nonadherence:  
Hip fracture:  
FC(50-80):kr817575.50 (\$74531.41),  
FC(<50):kr4454954 (\$549987.04)  
Spine fracture:  
FC(50-80):kr174700 (\$21568.12),  
FC(<50):kr226472 (\$27959.14)  
Humerus fracture:  
FC(50-80):kr117776.50 (\$14540.12),  
FC(<50):kr795217.50 (\$98173.70)  
Forearm fracture:  
FC(50-80):-kr463024 (-\$57162.70),  
FC(<50):kr45072.50 (\$8665.81)  
Other fracture:  
FC(50-80):-kr19261.50 (-\$2377.93),  
FC(<50):kr684067.50 (\$84451.66)

*Sunycz et al*[44] 2008 US

To examine the relationship between persistence and compliance with bisphosphonate therapy and total and osteoporosis related costs and healthcare resource utilisation in a cohort of female bisphosphonate naïve users.

Design: Retrospective observational study  
Follow Up: 3 years  
Sample Size: 32944 (A:12186, NA:20758)

Measure: MPR  
Classification: (≥80% = compliant, <80% = noncompliant)  
Method of Assessment: pharmacy claims data

Total healthcare costs  
Inpatient costs  
Outpatient costs  
ED costs  
Pharmacy costs  
Radiology costs

Type of Costs: unadjusted  
Classification: all cause and disease state specific  
Currency Year: USD, 2005  
Cost of Nonadherence:  
All cause:  
THC:\$23660 (\$28394.52),  
IC:\$18839 (\$22608.81),  
OC:\$10061 (\$12074.27),  
EDC:\$832 (\$988.49),  
PC:\$6941 (\$8329.94),  
RC:\$1079 (\$1294.91)  
Disease state specific:  
THC:\$1602 (\$1922.57),  
IC:\$14074 (\$16890.30),  
OC:\$501 (\$601.25),  
EDC:\$452 (\$542.45),

Quality: low  
Classification: cost description

|    |                        |                        |                              |                        |                       |                                               |
|----|------------------------|------------------------|------------------------------|------------------------|-----------------------|-----------------------------------------------|
| 1  |                        |                        |                              |                        |                       |                                               |
| 2  |                        |                        |                              |                        |                       |                                               |
| 3  |                        |                        |                              |                        |                       |                                               |
| 4  |                        |                        |                              |                        | PC:\$918 (\$1101.70), |                                               |
| 5  |                        |                        |                              |                        | RC:\$184 (\$220.82)   |                                               |
| 6  | <i>Zhao et al</i> [45] | To examine the         | <u>Design:</u> Retrospective | <u>Measure:</u> PDC    | Total                 | <u>Type of Costs:</u> adjusted and unadjusted |
| 7  | 2014                   | association between    | cohort study                 | <u>Classification:</u> | healthcare            | <u>Classification:</u> disease state specific |
| 8  | US                     | teriparatide adherence | <u>Follow Up:</u> 36 months  | (≥80% = high, 50-      | costs                 | <u>Currency Year:</u> USD, 2010               |
| 9  |                        | and healthcare         | <u>Sample Size:</u> 824      | 80% = medium,          | Inpatient costs       | <u>Cost of Nonadherence*:</u>                 |
| 10 |                        | utilisation and costs  | (≥80:362, 50-80%:219,        | <50% = low)            | Outpatient            | Adjusted:                                     |
| 11 |                        | among hip fracture     | <50%:243)                    | <u>Method of</u>       | costs                 | THC(≥80):\$34428 (\$37553.4),                 |
| 12 |                        | patients.              |                              | <u>Assessment:</u>     | Pharmacy              | THC(50-80):\$37956 (\$41401.68),              |
| 13 |                        |                        |                              | pharmacy claims        | costs                 | THC(<50):\$31188 (\$34019.28),                |
| 14 |                        |                        |                              | data                   |                       | IC(≥80):\$7548 (\$8233.20),                   |
| 15 |                        |                        |                              |                        |                       | IC(50-80):\$11520 (\$1256.80),                |
| 16 |                        |                        |                              |                        |                       | IC(<50):\$11556 (\$12605.04),                 |
| 17 |                        |                        |                              |                        |                       | OC(≥80):\$9312 (\$10157.40),                  |
| 18 |                        |                        |                              |                        |                       | OC(50-80):\$12816 (\$13979.40),               |
| 19 |                        |                        |                              |                        |                       | OC(<50):\$13044 (\$14228.16),                 |
| 20 |                        |                        |                              |                        |                       | PC(≥80):\$18864 (\$20576.52),                 |
| 21 |                        |                        |                              |                        |                       | PC(50-80):\$13116 (\$14306.64),               |
| 22 |                        |                        |                              |                        |                       | PC(<50):\$7452 (\$8128.44)                    |
| 23 |                        |                        |                              |                        |                       | Unadjusted:                                   |
| 24 |                        |                        |                              |                        |                       | THC(≥80):\$37464 (\$40865.04),                |
| 25 |                        |                        |                              |                        |                       | THC(50-80):\$35076 (\$38260.20),              |
| 26 |                        |                        |                              |                        |                       | THC(<50):\$29484 (\$32160.60),                |
| 27 |                        |                        |                              |                        |                       | IC(≥80):\$7092 (\$7735.80),                   |
| 28 |                        |                        |                              |                        |                       | IC(50-80):\$11100 (\$12107.64),               |
| 29 |                        |                        |                              |                        |                       | IC(<50):\$10632 (\$11597.16),                 |
| 30 |                        |                        |                              |                        |                       | OC(≥80):\$9900 (\$10798.68),                  |
| 31 |                        |                        |                              |                        |                       | OC(50-80):\$11352 (\$12382.56),               |
| 32 |                        |                        |                              |                        |                       | OC(<50):\$11988 (\$13076.28),                 |
| 33 |                        |                        |                              |                        |                       | PC(≥80):\$20484 (\$22343.52),                 |
| 34 |                        |                        |                              |                        |                       | PC(50-80):\$12624 (\$13770),                  |
| 35 |                        |                        |                              |                        |                       | PC(<50):\$6864 (\$7487.16)                    |
| 36 |                        |                        |                              |                        |                       |                                               |
| 37 |                        |                        |                              |                        |                       |                                               |
| 38 |                        |                        |                              |                        |                       |                                               |
| 39 | <i>Zhao et al</i> [46] | To examine the         | <u>Design:</u> Retrospective | <u>Measure:</u> PDC    | Total                 | <u>Type of Costs:</u> adjusted and unadjusted |
| 40 |                        |                        |                              |                        |                       | <u>Quality:</u> medium                        |
| 41 |                        |                        |                              |                        |                       |                                               |
| 42 |                        |                        |                              |                        |                       |                                               |
| 43 |                        |                        |                              |                        |                       |                                               |
| 44 |                        |                        |                              |                        |                       |                                               |
| 45 |                        |                        |                              |                        |                       |                                               |
| 46 |                        |                        |                              |                        |                       |                                               |

1  
2  
3  
4  
5  
6  
7  
8  
9  
10  
11  
12  
13  
14  
15  
16  
17  
18  
19  
20  
21  
22  
23  
24  
25  
26  
27  
28  
29  
30  
31  
32  
33  
34  
35  
36  
37  
38  
39  
40  
41  
42  
43  
44  
45  
46

|                                                               |                                                                                                                                                   |                                                                                                                             |                                                                                                                              |                                                                           |                                                                                                                                                                                                                                                                                                                                                                                                                                                                                                                                                                                                                                                                                                                                                                                                                                                                                                                                                                                   |                                                       |
|---------------------------------------------------------------|---------------------------------------------------------------------------------------------------------------------------------------------------|-----------------------------------------------------------------------------------------------------------------------------|------------------------------------------------------------------------------------------------------------------------------|---------------------------------------------------------------------------|-----------------------------------------------------------------------------------------------------------------------------------------------------------------------------------------------------------------------------------------------------------------------------------------------------------------------------------------------------------------------------------------------------------------------------------------------------------------------------------------------------------------------------------------------------------------------------------------------------------------------------------------------------------------------------------------------------------------------------------------------------------------------------------------------------------------------------------------------------------------------------------------------------------------------------------------------------------------------------------|-------------------------------------------------------|
| 2013<br>US                                                    | association between teriparatide (TPTD) adherence and healthcare utilisation and costs in real world US kyphoplasty/vertebroplasty (KV) patients. | observational cohort study<br><u>Follow Up:</u> 36 months<br><u>Sample Size:</u> 1568<br>(≥80: 783, 50-80%: 382, <50%: 403) | <u>Classification:</u><br>(≥80% = high, 50-80% = medium, <50% = low)<br><u>Method of Assessment:</u><br>pharmacy claims data | healthcare costs<br>Inpatient costs<br>Outpatient costs<br>Pharmacy costs | <u>Classification:</u> disease state specific<br><u>Currency Year:</u> USD, 2010<br><u>Cost of Nonadherence*:</u><br>Adjusted:<br>THC(≥80):\$40212 (\$43862.52),<br>THC(50-80):\$40512 (\$44189.76),<br>THC(<50):\$40128 (\$43770.84),<br>IC(≥80):\$8136 (\$8874.60),<br>IC(50-80):\$12060 (\$13154.76),<br>IC(<50):\$15444 (\$43404.36),<br>OC(≥80):\$12924 (\$14097.24),<br>OC(50-80):\$14928 (\$16283.16),<br>OC(<50):\$17568 (\$19162.80),<br>PC(≥80):\$19392 (\$21152.40),<br>PC(50-80):\$13908 (\$15170.52),<br>PC(<50):\$8700 (\$9843.24)<br>Unadjusted:<br>THC(≥80):\$42768 (\$46650.48),<br>THC(50-80):\$36780 (\$40118.88),<br>THC(<50):\$39792 (\$43404.36),<br>IC(≥80):\$7620 (\$8311.80),<br>IC(50-80):\$12228 (\$13338.12),<br>IC(<50):\$15768 (\$17199.48),<br>OC(≥80):\$14580 (\$15903.60),<br>OC(50-80):\$12108 (\$13207.20),<br>OC(<50):\$15324 (\$16715.16),<br>PC(≥80):\$20568 (\$22435.20),<br>PC(50-80):\$12444 (\$13573.68),<br>PC(<50):\$8700 (\$9489.84) | <u>Classification:</u> cost description               |
| <b>Respiratory Disease</b><br><i>Delea et al</i> [47]<br>2008 | To assess the association between                                                                                                                 | <u>Design:</u> Retrospective longitudinal cohort                                                                            | <u>Measure:</u> MPR<br><u>Classification:</u>                                                                                | Total costs<br>Outpatient                                                 | <u>Type of Costs:</u> unadjusted<br><u>Classification:</u> disease state specific                                                                                                                                                                                                                                                                                                                                                                                                                                                                                                                                                                                                                                                                                                                                                                                                                                                                                                 | <u>Quality:</u> medium<br><u>Classification:</u> cost |

|    |                         |                         |                                |                             |                |                                               |
|----|-------------------------|-------------------------|--------------------------------|-----------------------------|----------------|-----------------------------------------------|
| 1  |                         |                         |                                |                             |                |                                               |
| 2  |                         |                         |                                |                             |                |                                               |
| 3  | US                      | adherence with          | study                          | (≥75, 50-75%, 25-           | costs          | Currency Year: USD, 2003                      |
| 4  |                         | fluticasone             | <u>Follow Up:</u> 24 months    | 50%, <25%)                  | ED costs       | <u>Cost of Nonadherence*:</u>                 |
| 5  |                         | propionate/salmeterol   | <u>Sample Size:</u> 12907      | <u>Method of</u>            | Other costs    | TC(≥75):\$1564 (\$1990.27),                   |
| 6  |                         | combination product in  | (≥75: 2612, 50-75%:            | <u>Assessment:</u>          |                | TC(50-75):\$1128 (\$1435.44),                 |
| 7  |                         | a single inhaler and    | 3608, 25-50%: 5035,            | pharmacy claims             |                | TC(25-50):\$900 (\$1145.30),                  |
| 8  |                         | asthma care utilisation | <25%: 1652)                    | data                        |                | TC(<25):\$632 (\$804.25),                     |
| 9  |                         | and costs in asthma     |                                |                             |                | OC(≥75):\$1272 (\$1618.69),                   |
| 10 |                         | patients in typical US  |                                |                             |                | OC(50-75):\$852 (\$1084.21),                  |
| 11 |                         | clinical practice       |                                |                             |                | OC(25-50):\$600 (\$763.53),                   |
| 12 |                         |                         |                                |                             |                | OC(<25):\$388 (\$493.75),                     |
| 13 |                         |                         |                                |                             |                | EDC(≥75):\$32 (\$40.72),                      |
| 14 |                         |                         |                                |                             |                | EDC(50-75):\$36 (\$45.81),                    |
| 15 |                         |                         |                                |                             |                | EDC(25-50):\$60 (\$76.35),                    |
| 16 |                         |                         |                                |                             |                | EDC(<25):\$48 (\$61.08),                      |
| 17 |                         |                         |                                |                             |                | OtC(≥75):\$292 (\$371.59),                    |
| 18 |                         |                         |                                |                             |                | OtC(50-75):\$276 (\$351.22),                  |
| 19 |                         |                         |                                |                             |                | OtC(25-50):\$300 (\$381.77),                  |
| 20 |                         |                         |                                |                             |                | OtC(<25):\$240 (\$305.41)                     |
| 21 |                         |                         |                                |                             |                |                                               |
| 22 |                         |                         |                                |                             |                |                                               |
| 23 | <i>Diehl et al</i> [48] | To evaluate             | <u>Design:</u> Retrospective   | <u>Measure:</u> 37 day      | Total costs    | <u>Type of Costs:</u> unadjusted              |
| 24 | 2010                    | respiratory-related     | claims analysis                | gap in claims               | Pharmacy       | <u>Classification:</u> disease state specific |
| 25 | US                      | medical outcomes and    | <u>Follow Up:</u> 7 months     | <u>Classification:</u> (>37 | costs          | <u>Currency Year:</u> USD, 2007               |
| 26 |                         | cost for infants who    | <u>Sample Size:</u> 245 (A:73, | day gap in claims =         | Services costs | <u>Cost of Nonadherence:</u>                  |
| 27 |                         | were prescribed and     | NA:172)                        | noncompliant)               |                | TC:\$19093.46 (\$21656.12),                   |
| 28 |                         | received palivizumab in |                                | <u>Method of</u>            |                | PC:\$7647.40 (\$8673.81),                     |
| 29 |                         | accordance with the     |                                | <u>Assessment:</u>          |                | SC**:\$11604.03 (\$13161.45)                  |
| 30 |                         | dosing schedule         |                                | pharmacy claims             |                |                                               |
| 31 |                         | recommended by the      |                                | data                        |                |                                               |
| 32 |                         | American Academy of     |                                |                             |                |                                               |
| 33 |                         | Paediatrics in 2006     |                                |                             |                |                                               |
| 34 |                         | versus those who did    |                                |                             |                |                                               |
| 35 |                         | not.                    |                                |                             |                |                                               |
| 36 |                         |                         |                                |                             |                |                                               |
| 37 |                         |                         |                                |                             |                |                                               |
| 38 | <i>Joshi et al</i> [49] | Examine the             | <u>Design:</u> quantitative    | <u>Measure:</u> Morisky     | Total          | <u>Type of Costs:</u> unadjusted              |
| 39 | 2006                    | association of          | analysis                       | scale                       | productivity   | <u>Classification:</u> disease state specific |
| 40 |                         |                         |                                |                             |                | <u>Quality:</u> medium                        |
| 41 |                         |                         |                                |                             |                | <u>Classification:</u> cost                   |
| 42 |                         |                         |                                |                             |                |                                               |
| 43 |                         |                         |                                |                             |                |                                               |
| 44 |                         |                         |                                |                             |                |                                               |
| 45 |                         |                         |                                |                             |                |                                               |
| 46 |                         |                         |                                |                             |                |                                               |

1  
2  
3  
4  
5  
6  
7  
8  
9  
10  
11  
12  
13  
14  
15  
16  
17  
18  
19  
20  
21  
22  
23  
24  
25  
26  
27  
28  
29  
30  
31  
32  
33  
34  
35  
36  
37  
38  
39  
40  
41  
42  
43  
44  
45  
46

|                                                |                                                                                                                                                                                        |                                                                                                                                            |                                                                                                                                        |                                                                                                                                                                                                         |                                                                                                                                                                                                                                                                                                                                                                                              |                                                                   |
|------------------------------------------------|----------------------------------------------------------------------------------------------------------------------------------------------------------------------------------------|--------------------------------------------------------------------------------------------------------------------------------------------|----------------------------------------------------------------------------------------------------------------------------------------|---------------------------------------------------------------------------------------------------------------------------------------------------------------------------------------------------------|----------------------------------------------------------------------------------------------------------------------------------------------------------------------------------------------------------------------------------------------------------------------------------------------------------------------------------------------------------------------------------------------|-------------------------------------------------------------------|
| US                                             | medication adherence with workplace productivity and health related quality of life in asthma patients.                                                                                | <u>Follow Up:</u><br><u>Sample Size:</u> 385 (high:150, medium:73, low: 162)                                                               | <u>Classification:</u> (0= high adherence, 1-2 = medium adherence, >2 = low adherence)<br><u>Method of Assessment:</u> questionnaire   | cost<br>Absenteeism costs<br>Presenteeism costs                                                                                                                                                         | <u>Currency Year:</u> USD, 2002<br><u>Cost of Nonadherence<sup>##</sup>:</u><br>TPC(0):\$1210.90 (\$1571.73),<br>TPC(1-2):\$1428.50 (\$1854.17),<br>TPC(>2):\$1073.10 (\$1392.87),<br>AbC(0):\$633.70 (\$822.53),<br>AbC(1-2):\$608.90 (\$790.34),<br>AbC(>2):\$474.80 (\$616.28),<br>PrC(0):\$577.20 (\$749.20),<br>PrC(1-2):\$819.60 (\$1063.83),<br>PrC(>2):\$598.30 (\$776.59)           | outcome description                                               |
| <i>Miravittles et al</i> [50]<br>2013<br>Spain | To analyse the economic impact of non-adherence to the global initiative for obstructive lung disease (GOLD) guidelines in patients with chronic obstructive pulmonary disease (COPD). | <u>Design:</u> multicentre, retrospective, observational study<br><u>Follow Up:</u> 18 months<br><u>Sample Size:</u> 1365 (A:246, NA:1119) | <u>Measure:</u> GOLD 2007 Guidelines<br><u>Classification:</u> (adherent, nonadherent)<br><u>Method of Assessment:</u> GOLD guidelines | ED costs<br>Pharmacy costs<br>Physician office visit costs<br>Hospitalization costs<br>Primary care costs<br>Interdisciplinary visit costs<br>Medical test costs<br>Radiology costs<br>Laboratory costs | <u>Type of Costs:</u> unadjusted<br><u>Classification:</u> disease state specific<br><u>Currency Year:</u> EUR, 2009<br><u>Cost of Nonadherence:</u><br>EDC:€40.83 (\$57.91),<br>PC:€771.50 (\$1094.27),<br>POC:€106.29 (\$150.76),<br>HC:€101.61 (\$144.12),<br>PCC:€123.84 (\$175.65),<br>IntC:€321.44 (\$455.92),<br>MTC:€36.66 (\$51.99),<br>RC:€24.24 (\$34.38),<br>LC:€17.35 (\$24.61) | <u>Quality:</u> medium<br><u>Classification:</u> cost description |
| <i>Quittner et al</i> [51]<br>2014<br>US       | To evaluate associations of adherence to                                                                                                                                               | <u>Design:</u> retrospective, cohort study<br><u>Follow Up:</u> 2 years                                                                    | <u>Measure:</u> MPR<br><u>Classification:</u> (≥80% = high                                                                             | Total healthcare costs                                                                                                                                                                                  | <u>Type of Costs:</u> unadjusted<br><u>Classification:</u> all cause and disease state specific                                                                                                                                                                                                                                                                                              | <u>Quality:</u> medium<br><u>Classification:</u> cost description |

pulmonary medications, age, healthcare use and cost among cystic fibrosis patients.

Sample Size: 3287  
(≥80%: 663, 50-80%: 949, <50%: 1675)

adherence, 50-80% = moderate adherence, <50% = low adherence)  
Method of Assessment:  
pharmacy claims data

Currency Year: USD, 2011  
Cost of Nonadherence\*:  
All cause:  
THC(≥80):\$35749.50 (\$38244.05),  
THC(50-80):\$45031.50 (\$48173.73),  
THC(<50):\$50284.50 (\$53793.28)  
Disease state specific:  
THC(≥80):\$23764 (\$25422.22),  
THC(50-80):\$33132.50 (\$35444.44),  
THC(<50):\$33894 (\$36259.07)

**Gastrointestinal Disease**

*Carter et al*[52]  
2011  
US

To further evaluate the impact of adherence to infliximab on CD related utilisation and inpatient costs in the first year of treatment using a different definition of adherence and a larger more diverse claims database.

Design: retrospective, observational cohort claims analysis  
Follow Up: 12 months  
Sample Size: 638  
(A:466, NA:172)

Measure: number of infusions in 12 month period  
Classification: (7-9 infusions = adherent, <7 infusions = nonadherent)  
Method of Assessment:  
health claims data

Hospitalization costs

Type of Costs: unadjusted  
Classification: disease state specific  
Currency Year: USD, 2007  
Cost of Nonadherence:  
HC:\$37783 (\$42854.12)

Quality: medium  
Classification: cost outcome description

*Gosselin et al*[53]  
2009  
US

To examine the effects of gastroesophageal reflux disease (GERD) patients compliance with PPI therapy on health care resource utilisation and costs.

Design: retrospective cohort study  
Follow Up:  
Sample Size: 41837  
(A:28321, NA:13516)

Measure: MPR  
Classification: (≥80% = adherent, <80% = nonadherent)  
Method of Assessment:  
pharmacy claims data

Total costs  
Inpatient costs  
Outpatient costs  
Pharmacy costs  
Medical costs

Type of Costs: adjusted  
Classification: disease state specific  
Currency Year: USD, 2003  
Cost of Nonadherence:  
TC:\$9497 (\$12085.43),  
IC:\$2116 (\$2692.72),  
OC:\$5458 (\$6945.59),  
PC:\$1922 (\$2445.85),  
MC:\$7575 (\$9639.58)

Quality: medium  
Classification: cost description

1  
2  
3  
4  
5  
6  
7  
8  
9  
10  
11  
12  
13  
14  
15  
16  
17  
18  
19  
20  
21  
22  
23  
24  
25  
26  
27  
28  
29  
30  
31  
32  
33  
34  
35  
36  
37  
38  
39  
40  
41  
42  
43  
44  
45  
46

|                                       |                                                                                                                                                                                |                                                                                                                                      |                                                                                                                                                                                                     |                                                                                                            |                                                                                                                                                                                                                                                                                                                                                                                                                                                        |                                                                           |
|---------------------------------------|--------------------------------------------------------------------------------------------------------------------------------------------------------------------------------|--------------------------------------------------------------------------------------------------------------------------------------|-----------------------------------------------------------------------------------------------------------------------------------------------------------------------------------------------------|------------------------------------------------------------------------------------------------------------|--------------------------------------------------------------------------------------------------------------------------------------------------------------------------------------------------------------------------------------------------------------------------------------------------------------------------------------------------------------------------------------------------------------------------------------------------------|---------------------------------------------------------------------------|
| <i>Kane et al</i> [54]<br>2009<br>US  | To evaluate adherence to infliximab maintenance therapy and the impact of medication adherence on healthcare utilisation and costs by patients.                                | <u>Design:</u> retrospective cohort analysis<br><u>Follow Up:</u> 12 months<br><u>Sample Size:</u> 571 (A:375, NA:196)               | <u>Measure:</u> number of infusions in 12 month period<br><u>Classification:</u> ( $\geq 8$ infusions = adherent, $< 7$ infusions = nonadherent)<br><u>Method of Assessment:</u> health claims data | Outpatient costs<br>ED costs<br>Pharmacy costs<br>Medical costs<br>Hospitalization costs                   | <u>Type of Costs:</u> unadjusted<br><u>Classification:</u> all cause and disease state specific<br><u>Currency Year:</u> USD, 2004<br><u>Cost of Nonadherence:</u><br>All cause:<br>OC:\$6679 (\$8272.62),<br>EDC:\$314 (\$388.92),<br>MC:\$16129 (\$19977.40),<br>HC:\$6893 (\$8537.68)<br>Disease state specific:<br>OC:\$3931 (\$4868.94),<br>EDC:\$91 (\$112.71),<br>PC:\$18751 (\$23225.01),<br>MC:\$10243 (\$12686.99),<br>HC:\$4494 (\$5566.27) | <u>Quality:</u> medium<br><u>Classification:</u> cost outcome description |
| <i>Mitra et al</i> [55]<br>2012<br>US | To assess the association between adherence to oral 5-aminosalicylates (5-ASAs) and all cause costs and health care utilisation among patients with active ulcerative colitis. | <u>Design:</u> retrospective, observational cohort study<br><u>Follow Up:</u> 12 months<br><u>Sample Size:</u> 1693 (A:476, NA:1216) | <u>Measure:</u> MPR<br><u>Classification:</u> ( $\geq 80\%$ = adherent, $< 80\%$ = nonadherent)<br><u>Method of Assessment:</u> pharmacy claims data                                                | Inpatient costs<br>Outpatient costs<br>ED costs<br>Pharmacy costs<br>Ancillary costs<br>Non-pharmacy costs | <u>Type of Costs:</u> adjusted<br><u>Classification:</u> all cause and disease state specific<br><u>Currency Year:</u> USD, 2010<br><u>Cost of Nonadherence:</u><br>All cause:<br>PC:\$1541.60 (\$1681.55)<br>Disease state specific:<br>IC:\$28726.65 (\$31334.47),<br>OC:\$1145.67 (\$1249.67),<br>EDC:\$635.95 (\$693.68),<br>AC:\$4923.29 (\$5370.23),<br>NPC:\$14226.32 (\$15517.79)                                                              | <u>Quality:</u> high<br><u>Classification:</u> cost description           |
| <i>Wan et al</i> [56]<br>2014<br>US   | To examine the effect of adherence versus non-adherence on healthcare costs in                                                                                                 | <u>Design:</u> retrospective cohort analysis<br><u>Follow Up:</u> 360 days<br><u>Sample Size:</u> 1646                               | <u>Measure:</u> MPR<br><u>Classification:</u> ( $\geq 80\%$ = adherent, $< 80\%$ =                                                                                                                  | Total costs<br>Total healthcare costs                                                                      | <u>Type of Costs:</u> adjusted<br><u>Classification:</u> all cause and disease state specific<br><u>Currency Year:</u> USD, 2009                                                                                                                                                                                                                                                                                                                       | <u>Quality:</u> high<br><u>Classification:</u> cost description           |



patients with inflammatory bowel disease.

(A:674, NA:972)

nonadherent)  
Method of Assessment:  
pharmacy claims data

Inpatient costs  
Outpatient costs  
ED costs  
Pharmacy costs

Cost of Nonadherence:  
All cause:  
TC:\$47411 (\$52341.27),  
THC:\$32522 (\$35903.96),  
IC:\$17634 (\$19467.76),  
OC:\$10909 (\$12043.43),  
EDC:\$458 (\$505.63),  
PC:\$18410 (\$20324.46)  
Disease state specific:  
TC:\$33652 (\$37151.47),  
THC:\$18764 (\$20715.27),  
IC:\$12564 (\$13870.53),  
OC:\$5890 (\$6502.50),  
EDC:\$48 (\$52.99),  
PC:\$15150 (\$16725.45)

## Epilepsy

*Davis et al*[57]  
2008  
US

To assess the extent of refill non-adherence with antiepileptic drugs (AEDs) and the potential association between AED non-adherence and healthcare costs in an adult managed care population.

Design: retrospective claims analysis  
Follow Up: 12 months  
Sample Size: 10892 (A:6644, NA:4248)

Measure: MPR  
Classification: (≥80% = adherent, <80% = nonadherent)  
Method of Assessment: pharmacy claims data

Total costs  
Inpatient costs  
ED costs  
Pharmacy costs  
Other pharmacy costs

Type of Costs: unadjusted  
Classification: disease state specific  
Currency Year: USD, 2003  
Cost of Nonadherence<sup>###</sup>:  
TC:\$1466 (\$1865.56),  
IC:\$1799 (\$2289.32),  
EDC:\$260 (\$330.86),  
PC:-\$71 (-\$90.35),  
OtPC:-\$358 (-\$455.57)

Quality: medium  
Classification: cost description

*Ettinger et al*[58]  
2009  
US

To assess the extent to which elderly patients diagnosed with epilepsy are non-adherent to antiepileptic drugs (AEDs) and the

Design: retrospective claims analysis  
Follow Up: 12 months  
Sample Size: 1278 (A:758, NA:520)

Measure: MPR  
Classification: (≥80% = adherent, <80% = nonadherent)  
Method of Assessment:

Total costs  
Inpatient costs  
ED costs  
Pharmacy costs  
Physician Office visit

Type of Costs: unadjusted  
Classification: disease state specific  
Currency Year: USD, 2003  
Cost of Nonadherence:  
TC:\$17817 (\$22673.06),  
IC:\$2714 (\$3453.71),  
EDC:\$526 (\$669.36),

Quality: medium  
Classification: cost outcome description

|    |                          |                        |                              |                 |                                                |                             |
|----|--------------------------|------------------------|------------------------------|-----------------|------------------------------------------------|-----------------------------|
| 1  |                          |                        |                              |                 |                                                |                             |
| 2  |                          |                        |                              |                 |                                                |                             |
| 3  |                          | potential association  | pharmacy claims              | costs           | PC:\$347 (\$441.58),                           |                             |
| 4  |                          | between AED non-       | data                         | Ancillary costs | POC:\$3063 (\$3897.83),                        |                             |
| 5  |                          | adherence and seizure  |                              | Other           | AC:\$8344 (\$10618.18),                        |                             |
| 6  |                          | recurrence, resource   |                              | pharmacy        | OtPC:\$2822 (\$3591.14)                        |                             |
| 7  |                          | utilisation and annual |                              | costs           |                                                |                             |
| 8  |                          | direct medical costs.  |                              |                 |                                                |                             |
| 9  |                          |                        |                              |                 |                                                |                             |
| 10 | <i>Faught et al[59]</i>  | To study the impact of | <u>Design:</u> retrospective | Total costs     | <u>Type of Costs:</u> unadjusted               | <u>Quality:</u> medium      |
| 11 | 2009                     | non-adherence to       | observational open           | Inpatient costs | <u>Classification:</u> disease state specific  | <u>Classification:</u> cost |
| 12 | US                       | antiepileptic drugs    | cohort design                | Outpatient      | <u>Currency Year:</u> USD, 2002                | <u>description</u>          |
| 13 |                          | (AEDs) on healthcare   | <u>Follow Up:</u> 4.65 years | costs           | <u>Cost of Nonadherence*:</u>                  |                             |
| 14 |                          | utilisation and direct | <u>Sample Size:</u> 33658    | ED costs        | TC:\$14417.64 (\$18713.91),                    |                             |
| 15 |                          | medical costs in a     | (A:24907, NA:8751)           | Pharmacy        | IC:\$6682.28 (\$6873.51),                      |                             |
| 16 |                          | Medicaid population.   | <u>Method of</u>             | costs           | OC:\$2172.40 (\$2819.75),                      |                             |
| 17 |                          |                        | <u>Assessment:</u>           | Other           | EDC:\$405.96 (\$526.93),                       |                             |
| 18 |                          |                        | pharmacy claims              | pharmacy        | PC:\$822.40 (\$1067.46),                       |                             |
| 19 |                          |                        | data                         | costs           | OtPC:\$4334.60 (\$5626.26)                     |                             |
| 20 |                          |                        |                              |                 |                                                |                             |
| 21 | <b>HIV/AIDS</b>          |                        |                              |                 |                                                |                             |
| 22 | <i>Barnett et al[60]</i> | To characterise the    | <u>Design:</u> retrospective | Total costs     | <u>Type of Costs:</u> unadjusted               | <u>Quality:</u> medium      |
| 23 | 2011                     | cost of HIV care       | observational cohort         |                 | <u>Classification:</u> disease state specific; | <u>Classification:</u> cost |
| 24 | US                       | including combination  | study                        |                 | viral load count                               | <u>description</u>          |
| 25 |                          | antiretroviral         | <u>Follow Up:</u> 1 year     |                 | <u>Currency Year:</u> USD, 2006                |                             |
| 26 |                          | treatment.             | <u>Sample Size:</u> 1896     |                 | <u>Cost of Nonadherence**:</u>                 |                             |
| 27 |                          |                        | (not specified)              |                 | High viral load:                               |                             |
| 28 |                          |                        |                              |                 | TC:\$25824 (\$30067.54)                        |                             |
| 29 |                          |                        |                              |                 | Low viral load:                                |                             |
| 30 |                          |                        |                              |                 | TC:\$20509.67 (\$23879.92)                     |                             |
| 31 |                          |                        |                              |                 |                                                |                             |
| 32 |                          |                        |                              |                 |                                                |                             |
| 33 |                          |                        |                              |                 |                                                |                             |
| 34 |                          |                        |                              |                 |                                                |                             |
| 35 |                          |                        |                              |                 |                                                |                             |
| 36 |                          |                        |                              |                 |                                                |                             |
| 37 |                          |                        |                              |                 |                                                |                             |
| 38 |                          |                        |                              |                 |                                                |                             |
| 39 | <i>Cooke et al[61]</i>   | To measure adherence   | <u>Design:</u> retrospective | Total           | <u>Type of Costs:</u> unadjusted               | <u>Quality:</u> medium      |
| 40 |                          |                        |                              |                 |                                                |                             |
| 41 |                          |                        |                              |                 |                                                |                             |
| 42 |                          |                        |                              |                 |                                                |                             |
| 43 |                          |                        |                              |                 |                                                |                             |
| 44 |                          |                        |                              |                 |                                                |                             |
| 45 |                          |                        |                              |                 |                                                |                             |
| 46 |                          |                        |                              |                 |                                                |                             |

|                                                                     |                                                                                                                                                                                                                   |                                                                                                                  |                                                                                                                                          |                                                                                                                                    |                                                                                                                                                                                                                                                                                                                                                                                                                                                                 |                                                                           |
|---------------------------------------------------------------------|-------------------------------------------------------------------------------------------------------------------------------------------------------------------------------------------------------------------|------------------------------------------------------------------------------------------------------------------|------------------------------------------------------------------------------------------------------------------------------------------|------------------------------------------------------------------------------------------------------------------------------------|-----------------------------------------------------------------------------------------------------------------------------------------------------------------------------------------------------------------------------------------------------------------------------------------------------------------------------------------------------------------------------------------------------------------------------------------------------------------|---------------------------------------------------------------------------|
| 2014<br>US                                                          | to antiretroviral therapy regimens in commercially insured patients with HIV infection and analyse the clinical and demographic factors associated with ≥90% adherence.                                           | claims analysis<br><u>Follow Up:</u> 1 year<br><u>Sample Size:</u> 3528 (A:1737, NA:640)                         | <u>Classification:</u> (≥90% = adherent, <90% = nonadherent)<br><u>Method of Assessment:</u> pharmacy claims data                        | healthcare costs<br>Inpatient costs<br>Outpatient costs<br>Pharmacy costs                                                          | <u>Classification:</u> disease state specific<br><u>Currency Year:</u> USD, 2011<br><u>Cost of Nonadherence:</u> THC:\$18868 (\$20184.58), IC:\$2700 (\$2888.40), OC:\$915 (\$978.85), PC:\$15253 (\$16317.33)                                                                                                                                                                                                                                                  | <u>Classification:</u> cost description                                   |
| <i>Pruitt et al</i> [62]<br>2015<br>US                              | To examine Medicaid insured HIV positive and AIDS diagnosed patient groups separately to determine association of ART adherence to mean monthly total healthcare expenditures in the 24 month measurement period. | <u>Design:</u> retrospective cohort study<br><u>Follow Up:</u> 2 years<br><u>Sample Size:</u> 502 (A:56, NA:176) | <u>Measure:</u> MPR<br><u>Classification:</u> (≥90% = adherent, <90% = nonadherent)<br><u>Method of Assessment:</u> pharmacy claims data | Total costs<br>Inpatient costs<br>Outpatient costs<br>Pharmacy costs<br>Other pharmacy costs<br>Behavioural health inpatient costs | <u>Type of Costs:</u> unadjusted<br><u>Classification:</u> disease state specific<br><u>Currency Year:</u> USD, 2009<br><u>Cost of Nonadherence*:</u> HIV: TC:\$15360 (\$16957.32), IC:\$3864 (\$4265.76), OC:\$3948 (\$4358.52), PC:\$4956 (\$5471.40), OtPC:\$1764 (\$1947.48), BHIC:\$840 (\$927.36)<br>AIDS: TC:\$27648 (\$30523.08), IC:\$13008 (\$14360.76), OC:\$5880 (\$6491.52), PC:\$5640 (\$6226.56), OtPC:\$2580 (\$2848.32), BHIC:\$528 (\$582.96) | <u>Quality:</u> medium<br><u>Classification:</u> cost description         |
| <b>Parkinson's Disease</b><br><i>Davis et al</i> [63]<br>2010<br>US | To assess the extent to which patients diagnosed with Parkinson's disease are                                                                                                                                     | <u>Design:</u> retrospective administrative claims study<br><u>Follow Up:</u> 12 months                          | <u>Measure:</u> MPR<br><u>Classification:</u> (≥80% = adherent, <80% =                                                                   | Total costs<br>Pharmacy costs<br>Medical costs                                                                                     | <u>Type of Costs:</u> unadjusted<br><u>Classification:</u> disease state specific<br><u>Currency Year:</u> USD, 2001<br><u>Cost of Nonadherence:</u>                                                                                                                                                                                                                                                                                                            | <u>Quality:</u> medium<br><u>Classification:</u> cost outcome description |

1  
2  
3  
4  
5  
6  
7  
8  
9  
10  
11  
12  
13  
14  
15  
16  
17  
18  
19  
20  
21  
22  
23  
24  
25  
26  
27  
28  
29  
30  
31  
32  
33  
34  
35  
36  
37  
38  
39  
40  
41  
42  
43  
44  
45  
46

non-adherent with antiparkinson therapy and the potential association between non-adherence and all cause medical costs.  
To assess the associations between adherence to levodopa/carbidopa/entacapone therapy and healthcare utilisation and costs.

Sample Size: 3119 (A:1211, NA:1908)  
Design: retrospective historical cohort study  
Follow Up: 12 months  
Sample Size: 1215 (A:617, NA:598)

nonadherent)  
Method of Assessment: pharmacy claims data  
Measure: PDC  
Classification: (≥80% = satisfactory, <80% = unsatisfactory)  
Method of Assessment: pharmacy claims data

Total costs  
Inpatient costs  
Pharmacy costs  
Other costs

TC:\$18511 (\$24262.36),  
PC:\$2684 (\$3537.36),  
MC:\$15827 (\$20859.12)  
Type of Costs: adjusted and unadjusted  
Classification: all cause and disease state specific  
Currency Year: USD, 2005  
Cost of Nonadherence:  
Adjusted all cause:  
TC:\$19686 (\$23625.30),  
IC:\$5954 (\$7145.43),  
PC:\$6391 (\$7669.88),  
OtC:\$8795 (\$10554.94)  
Adjusted disease state specific:  
TC:\$8574 (\$10289.71),  
IC:\$3705 (\$4446.39),  
PC:\$3850 (\$4620.41),  
OtC:\$1884 (\$2261)  
Unadjusted all cause:  
TC:\$19362 (\$23236.46),  
IC:\$5463 (\$6556.18),  
PC:\$6158 (\$7390.26),  
OtC:\$7740 (\$9288.82)  
Unadjusted disease state specific:  
TC:\$9156 (\$10988.18),  
IC:\$3238 (\$3885.94),  
PC:\$3789 (\$4547.20),  
OtC:\$2129 (\$2555.03)

Quality: high  
Classification: cost description

*Delea et al*[64]  
2011  
US

To examine the associations of

Design: retrospective cross-sectional study

Measure: MPR  
Classification:

Total costs  
Inpatient costs

Type of Costs: unadjusted  
Classification: disease state specific

Quality: medium  
Classification: cost

*Wei et al*[65]  
2014

|    |                           |                         |                               |                        |                  |                                                 |
|----|---------------------------|-------------------------|-------------------------------|------------------------|------------------|-------------------------------------------------|
| 1  |                           |                         |                               |                        |                  |                                                 |
| 2  |                           |                         |                               |                        |                  |                                                 |
| 3  | US                        | adherence to            | <u>Follow Up:</u> 19 months   | (>90<100% = high,      | Outpatient       | <u>Currency Year:</u> USD, 2007                 |
| 4  |                           | antiparkinson drugs     | <u>Sample Size:</u> 7583 (90- | >80<89% =              | costs            | <u>Cost of Nonadherence:</u>                    |
| 5  |                           | with healthcare         | 100%:3948, 80-                | moderate, ≤79% =       | Pharmacy         | TC(90-100):\$36407 (\$41293.43),                |
| 6  |                           | utilisation and         | 89%:1456, ≤79%:2179)          | low)                   | costs            | TC(80-89):\$43417 (\$49244.29),                 |
| 7  |                           | economic outcomes.      |                               | <u>Method of</u>       |                  | TC(≤79):\$45867 (\$52023.13),                   |
| 8  |                           |                         |                               | <u>Assessment:</u>     |                  | IC(90-100):\$15294 (\$17346.71),                |
| 9  |                           |                         |                               | pharmacy claims        |                  | IC(80-89):\$21603 (\$24502.49),                 |
| 10 |                           |                         |                               | data                   |                  | IC(≤79):\$24727 (\$28045.78),                   |
| 11 |                           |                         |                               |                        |                  | OC(90-100):\$10155 (\$11517.97),                |
| 12 |                           |                         |                               |                        |                  | OC(80-89):\$11838 (\$13426.86),                 |
| 13 |                           |                         |                               |                        |                  | OC(≤79):\$12889 (\$14618.92),                   |
| 14 |                           |                         |                               |                        |                  | PC(90-100):\$10957 (\$12427.61),                |
| 15 |                           |                         |                               |                        |                  | PC(80-89):\$9976 (\$11314.95),                  |
| 16 |                           |                         |                               |                        |                  | PC(≤79):\$8251 (\$9358.42)                      |
| 17 |                           |                         |                               |                        |                  |                                                 |
| 18 |                           |                         |                               |                        |                  |                                                 |
| 19 | <b>Musculoskeletal</b>    |                         |                               |                        |                  |                                                 |
| 20 | <i>Ivanova et al</i> [66] | To compare the rates    | <u>Design:</u> retrospective  | <u>Measure:</u> MPR    | Total costs      | <u>Type of Costs:</u> unadjusted                |
| 21 | 2012                      | of severe relapse and   | cohort study                  | <u>Classification:</u> | Total            | <u>Classification:</u> all cause, disease state |
| 22 | US                        | total direct and        | <u>Follow Up:</u> 2 years     | (≥80% = adherent,      | healthcare       | specific and indirect                           |
| 23 |                           | indirect costs over a 2 | <u>Sample Size:</u> 648       | <80% =                 | costs            | <u>Currency Year:</u> USD, 2007                 |
| 24 |                           | year period between     | (A:448, NA:200)               | nonadherent)           | Inpatient costs  | <u>Cost of Nonadherence*:</u>                   |
| 25 |                           | US based employees      |                               | <u>Method of</u>       | Outpatient       | All cause:                                      |
| 26 |                           | with MS who were        |                               | <u>Assessment:</u>     | costs            | TC:\$8079 (\$9276.76),                          |
| 27 |                           | adherent and non-       |                               | pharmacy claims        | ED costs         | THC:\$6022 (\$6830.25),                         |
| 28 |                           | adherent to disease     |                               | data                   | Pharmacy         | IC:\$1030.50 (\$1168.81),                       |
| 29 |                           | modifying drugs.        |                               |                        | costs            | OC:\$3231 (\$3664.65),                          |
| 30 |                           |                         |                               |                        | Medical costs    | EDC:\$143.50 (\$162.76),                        |
| 31 |                           |                         |                               |                        | Short term       | PC:\$1617 (\$1834.03),                          |
| 32 |                           |                         |                               |                        | disability costs | MC:\$4405.50 (\$4996.79)                        |
| 33 |                           |                         |                               |                        | Absenteeism      | Disease state specific:                         |
| 34 |                           |                         |                               |                        | cost             | TC:\$3005 (\$3408.32),                          |
| 35 |                           |                         |                               |                        |                  | IC:\$505 (\$572.78),                            |
| 36 |                           |                         |                               |                        |                  | OC:\$1710 (\$1939.51),                          |
| 37 |                           |                         |                               |                        |                  | EDC:\$37 (\$41.97),                             |
| 38 |                           |                         |                               |                        |                  |                                                 |
| 39 |                           |                         |                               |                        |                  |                                                 |
| 40 |                           |                         |                               |                        |                  |                                                 |
| 41 |                           |                         |                               |                        |                  |                                                 |
| 42 |                           |                         |                               |                        |                  |                                                 |
| 43 |                           |                         |                               |                        |                  |                                                 |
| 44 |                           |                         |                               |                        |                  |                                                 |
| 45 |                           |                         |                               |                        |                  |                                                 |
| 46 |                           |                         |                               |                        |                  |                                                 |

1  
2  
3  
4  
5  
6  
7  
8  
9  
10  
11  
12  
13  
14  
15  
16  
17  
18  
19  
20  
21  
22  
23  
24  
25  
26  
27  
28  
29  
30  
31  
32  
33  
34  
35  
36  
37  
38  
39  
40  
41  
42  
43  
44  
45  
46

|                                                         |                                                                                                                                   |                                                                                                                           |                                                                                                                                          |                                                                      |                                                                                                                                                                                                                                                                                                                                                                                                         |                                                                   |
|---------------------------------------------------------|-----------------------------------------------------------------------------------------------------------------------------------|---------------------------------------------------------------------------------------------------------------------------|------------------------------------------------------------------------------------------------------------------------------------------|----------------------------------------------------------------------|---------------------------------------------------------------------------------------------------------------------------------------------------------------------------------------------------------------------------------------------------------------------------------------------------------------------------------------------------------------------------------------------------------|-------------------------------------------------------------------|
|                                                         |                                                                                                                                   |                                                                                                                           |                                                                                                                                          |                                                                      | PC:\$753 (\$854.07),<br>MC:\$2252 (\$2554.26)<br>Indirect:<br>STDC:\$1231 (\$1396.22),<br>AbC:\$826 (\$936.86)                                                                                                                                                                                                                                                                                          |                                                                   |
| <i>Tan et al</i> [67]<br>2011<br>US                     | To assess the impact of treatment adherence on MS related hospitalizations (inpatient), ER visits, MS relapses and medical costs. | <u>Design:</u> retrospective cohort study<br><u>Follow Up:</u> 12 months<br><u>Sample Size:</u> 2446 (A:1459, NA:987)     | <u>Measure:</u> MPR<br><u>Classification:</u> (≥80% = adherent, <80% = nonadherent)<br><u>Method of Assessment:</u> pharmacy claims data | Medical costs                                                        | <u>Type of Costs:</u> adjusted and unadjusted<br><u>Classification:</u> disease state specific<br><u>Currency Year:</u> USD, 2007<br><u>Cost of Nonadherence:</u><br>Adjusted:<br>MC:\$4348 (\$5062.49)<br>Unadjusted:<br>MC:\$5179 (\$6030.04)                                                                                                                                                         | <u>Quality:</u> medium<br><u>Classification:</u> cost description |
| <i>Zhao et al</i> [68]<br>2011<br>US                    | To examine predictors associated with duloxetine adherence and its association with healthcare costs among fibromyalgia patients. | <u>Design:</u> retrospective cohort analysis<br><u>Follow Up:</u> 12 months<br><u>Sample Size:</u> 5435 (A:1744, NA:3691) | <u>Measure:</u> MPR<br><u>Classification:</u> (≥80% = adherent, <80% = nonadherent)<br><u>Method of Assessment:</u> pharmacy claims data | Total costs<br>Inpatient costs<br>Outpatient costs<br>Pharmacy costs | <u>Type of Costs:</u> adjusted<br><u>Classification:</u> disease state specific<br><u>Currency Year:</u> USD, 2008<br><u>Cost of Nonadherence:</u> commercial:<br>TC:\$20323 (\$22609.12),<br>IC:\$4808 (\$5348.85),<br>OC:\$9822 (\$10926.87),<br>PC:\$5693 (\$6333.40)<br><u>Medicare:</u><br>TC:\$25282 (\$28125.96),<br>IC:\$8604 (\$9571.86),<br>OC:\$10068 (\$11200.54),<br>PC:\$6611 (\$7354.67) | <u>Quality:</u> medium<br><u>Classification:</u> cost analysis    |
| <b>Cancer</b><br><i>Darkow et al</i> [69]<br>2007<br>US | Estimate the association between treatment interruptions and non-adherence with                                                   | <u>Design:</u> retrospective observational cohort analysis<br><u>Follow Up:</u> 12 months<br><u>Sample Size:</u> 267      | <u>Measure:</u> MPR<br><u>Classification:</u> (≥95% = very high, >90<95% = high, >50<90% =                                               | Total healthcare costs<br>Inpatient costs<br>Outpatient              | <u>Type of Costs:</u> unadjusted<br><u>Classification:</u> disease state specific<br><u>Currency Year:</u> USD, 2004<br><u>Cost of Nonadherence:</u><br>THC(≥95):\$42250 (\$52330.90),                                                                                                                                                                                                                  | <u>Quality:</u> high<br><u>Classification:</u> cost description   |

|    |                         |                       |                              |                     |                                  |                                  |                        |
|----|-------------------------|-----------------------|------------------------------|---------------------|----------------------------------|----------------------------------|------------------------|
| 1  |                         |                       |                              |                     |                                  |                                  |                        |
| 2  |                         |                       |                              |                     |                                  |                                  |                        |
| 3  | imatinib and            | (≥95%:120, 90-95%:25, | intermediate,                | costs               | THC(90-95):\$39236 (\$48597.76), |                                  |                        |
| 4  | healthcare costs for US | 50-90%:69, <50%:53)   | <50% = low)                  | ED costs            | THC(50-90):\$54770 (\$67838.19), |                                  |                        |
| 5  | managed care patients.  |                       | <u>Method of</u>             | Pharmacy            | THC(<50):\$131357 (\$162698.93), |                                  |                        |
| 6  |                         |                       | <u>Assessment:</u>           | costs               | IC(≥95):\$1156 (\$1431.82),      |                                  |                        |
| 7  |                         |                       | pharmacy claims              | Medical costs       | IC(90-95):\$1362 (\$1686.97),    |                                  |                        |
| 8  |                         |                       | data                         | Other               | IC(50-90):\$19096 (\$23652.33),  |                                  |                        |
| 9  |                         |                       |                              | pharmacy            | IC(<50):\$81572 (\$101035.18),   |                                  |                        |
| 10 |                         |                       |                              | costs               | OC(≥95):\$9299 (\$11517.75),     |                                  |                        |
| 11 |                         |                       |                              | Other costs         | OC(90-95):\$11148 (\$13807.93),  |                                  |                        |
| 12 |                         |                       |                              |                     | OC(50-90):\$14631 (\$18121.97),  |                                  |                        |
| 13 |                         |                       |                              |                     | OC(<50):\$33956 (\$42057.94),    |                                  |                        |
| 14 |                         |                       |                              |                     | EDC(≥95):\$36 (\$44.59),         |                                  |                        |
| 15 |                         |                       |                              |                     | EDC(90-95):\$568 (\$703.53),     |                                  |                        |
| 16 |                         |                       |                              |                     | EDC(50-90):\$104 (\$128.81),     |                                  |                        |
| 17 |                         |                       |                              |                     | EDC(<50):\$183 (\$226.66),       |                                  |                        |
| 18 |                         |                       |                              |                     | PC(≥95):\$29056 (\$35988.80),    |                                  |                        |
| 19 |                         |                       |                              |                     | PC(90-95):\$23693 (\$29346.18),  |                                  |                        |
| 20 |                         |                       |                              |                     | PC(50-90):\$18330 (\$22703.56),  |                                  |                        |
| 21 |                         |                       |                              |                     | PC(<50):\$8733 (\$10816.70),     |                                  |                        |
| 22 |                         |                       |                              |                     | MC(≥95):\$10731 (\$13291.43),    |                                  |                        |
| 23 |                         |                       |                              |                     | MC(90-95):\$13452 (\$16661.66),  |                                  |                        |
| 24 |                         |                       |                              |                     | MC(50-90):\$34202 (\$42362.64),  |                                  |                        |
| 25 |                         |                       |                              |                     | MC(<50):\$116892                 |                                  |                        |
| 26 |                         |                       |                              |                     | (\$144782.57),OtPC(≥95):\$2462   |                                  |                        |
| 27 |                         |                       |                              |                     | (\$3049.44),                     |                                  |                        |
| 28 |                         |                       |                              |                     | OtPC(90-95):\$2091 (\$2589.92),  |                                  |                        |
| 29 |                         |                       |                              |                     | OtPC(50-90):\$2238 (\$2771.99),  |                                  |                        |
| 30 |                         |                       |                              |                     | OtPC(<50):\$5732 (\$7099.66),    |                                  |                        |
| 31 |                         |                       |                              |                     | OtC(≥95):\$241 (\$298.50),       |                                  |                        |
| 32 |                         |                       |                              |                     | OtC(90-95):\$374 (\$463.24),     |                                  |                        |
| 33 |                         |                       |                              |                     | OtC(50-90):\$371 (\$459.52),     |                                  |                        |
| 34 |                         |                       |                              |                     | OtC(<50):\$1181 (\$1462.79)      |                                  |                        |
| 35 |                         |                       |                              |                     |                                  |                                  |                        |
| 36 |                         |                       |                              |                     |                                  |                                  |                        |
| 37 |                         |                       |                              |                     |                                  |                                  |                        |
| 38 |                         |                       |                              |                     |                                  |                                  |                        |
| 39 | <i>Wu et al[70]</i>     | To examine the        | <u>Design:</u> retrospective | <u>Measure:</u> MPR | Total costs                      | <u>Type of Costs:</u> unadjusted | <u>Quality:</u> medium |
| 40 |                         |                       |                              |                     |                                  |                                  |                        |
| 41 |                         |                       |                              |                     |                                  |                                  |                        |
| 42 |                         |                       |                              |                     |                                  |                                  |                        |
| 43 |                         |                       |                              |                     |                                  |                                  |                        |
| 44 |                         |                       |                              |                     |                                  |                                  |                        |
| 45 |                         |                       |                              |                     |                                  |                                  |                        |
| 46 |                         |                       |                              |                     |                                  |                                  |                        |

For peer review only

1  
2  
3  
4  
5  
6  
7  
8  
9  
10  
11  
12  
13  
14  
15  
16  
17  
18  
19  
20  
21  
22  
23  
24  
25  
26  
27  
28  
29  
30  
31  
32  
33  
34  
35  
36  
37  
38  
39  
40  
41  
42  
43  
44  
45  
46

|                                                            |                                                                                                                                                                          |                                                                                                                                |                                                                                                                                                                     |                                                                                                              |                                                                                                                                                                                                                                                                                                                                                                         |                                                                   |
|------------------------------------------------------------|--------------------------------------------------------------------------------------------------------------------------------------------------------------------------|--------------------------------------------------------------------------------------------------------------------------------|---------------------------------------------------------------------------------------------------------------------------------------------------------------------|--------------------------------------------------------------------------------------------------------------|-------------------------------------------------------------------------------------------------------------------------------------------------------------------------------------------------------------------------------------------------------------------------------------------------------------------------------------------------------------------------|-------------------------------------------------------------------|
| 2010<br>US                                                 | association between adherence with imatinib and direct healthcare costs and resource utilisation                                                                         | observational cohort analysis<br><u>Follow Up:</u> 12 months<br><u>Sample Size:</u> 592 (A:350, NA:242)                        | <u>Classification:</u> ( $\geq 85\%$ = high adherence, $< 85\%$ = low adherence )<br><u>Method of Assessment:</u> pharmacy claims data                              | Inpatient costs<br>Outpatient costs<br>ED costs<br>Pharmacy costs<br>Other pharmacy costs                    | <u>Classification:</u> disease state specific<br><u>Currency Year:</u> USD, 2008<br><u>Cost of Nonadherence:</u> TC:\$107341 (\$119415.73), IC:\$44498 (\$49503.55), OC:\$34097 (\$37932.55), EDC:\$248 (\$275.90), PC:\$22846 (\$25415.93), OtPC:\$5652 (\$6287.79)                                                                                                    | <u>Classification:</u> cost description                           |
| <b>Addiction</b><br><i>Leider et al</i> [71]<br>2011<br>US | To assess the economic burden of chronic opioid users and to determine whether opioid regimen non-adherence contributes to increased healthcare costs.                   | <u>Design:</u> retrospective claims based analysis<br><u>Follow Up:</u> 12 months<br><u>Sample Size:</u> 2100 (A:442, NA:1658) | <u>Measure:</u> urine testing<br><u>Classification:</u> (positive test = nonadherent, negative test = adherent )<br><u>Method of Assessment:</u> health claims data | Total healthcare costs<br>Inpatient costs<br>Outpatient costs<br>ED costs<br>Pharmacy costs<br>Medical costs | <u>Type of Costs:</u> unadjusted<br><u>Classification:</u> disease state specific<br><u>Currency Year:</u> USD, 2008<br><u>Cost of Nonadherence:</u> THC:\$26433 (\$29406.43), IC:\$6361 (\$7076.55), OC:\$9734 (\$10828.97), EDC:\$421 (\$468.36), PC:\$7960 (\$8855.42), MC:\$1957 (\$2177.14)                                                                        | <u>Quality:</u> medium<br><u>Classification:</u> cost analysis    |
| <i>Tkacz et al</i> [72]<br>2014<br>US                      | To estimate the healthcare service utilisation and costs associated with buprenorphine medication assisted therapy adherence among a sample of opioid dependent members. | <u>Design:</u> retrospective cohort analysis<br><u>Follow Up:</u> 12 months<br><u>Sample Size:</u> 455 (A:146, NA:309)         | <u>Measure:</u> MPR<br><u>Classification:</u> ( $\geq 80\%$ = adherent, $< 80\%$ = nonadherent)<br><u>Method of Assessment:</u> pharmacy claims data                | Total healthcare costs<br>Inpatient costs<br>Outpatient costs<br>ED costs<br>Pharmacy costs                  | <u>Type of Costs:</u> adjusted and unadjusted<br><u>Classification:</u> disease state specific<br><u>Currency Year:</u> USD, 2010<br><u>Cost of Nonadherence:</u> Adjusted: THC:\$49051 (\$53503.88), IC:\$26470 (\$28872.96), OC:\$14570 (\$15892.67), EDC:\$4439 (\$4841.98), PC:\$3581 (\$3906.09)<br>Unadjusted: THC:\$47868 (\$52213.49), IC:\$26043 (\$28407.20), | <u>Quality:</u> medium<br><u>Classification:</u> cost description |



|    |                             |                       |                              |                        |                 |                                              |
|----|-----------------------------|-----------------------|------------------------------|------------------------|-----------------|----------------------------------------------|
| 1  |                             |                       |                              |                        |                 |                                              |
| 2  |                             |                       |                              |                        |                 |                                              |
| 3  |                             |                       |                              |                        |                 |                                              |
| 4  |                             |                       |                              |                        |                 |                                              |
| 5  |                             |                       |                              |                        |                 |                                              |
| 6  |                             |                       |                              |                        |                 |                                              |
| 7  | <b>Metabolic</b>            |                       |                              |                        |                 |                                              |
| 8  | <b>conditions other</b>     |                       |                              |                        |                 |                                              |
| 9  | <b>than diabetes</b>        |                       |                              |                        |                 |                                              |
| 10 | <b>mellitus</b>             |                       |                              |                        |                 |                                              |
| 11 | <i>Lee et al</i> [73]       | To assess the         | <u>Design:</u> retrospective | <u>Measure:</u> MPR    | Total costs     | <u>Type of Costs:</u> unadjusted             |
| 12 | 2011                        | relationship between  | cohort study                 | <u>Classification:</u> | Inpatient costs | <u>Classification:</u> all cause and disease |
| 13 | US                          | medication adherence  | <u>Follow Up:</u> 12 months  | (≥80% = high           | Outpatient      | state specific                               |
| 14 |                             | and healthcare costs  | <u>Sample Size:</u> 4923     | adherent, <80% =       | costs           | <u>Currency Year:</u> USD, 2010              |
| 15 |                             | among US patients on  | (A:1372, NA:1304)            | low adherent)          | ED costs        | <u>Cost of Nonadherence:</u>                 |
| 16 |                             | dialysis given        |                              | <u>Method of</u>       | Pharmacy        | All cause:                                   |
| 17 |                             | cinacalcet to manage  |                              | <u>Assessment:</u>     | costs           | PC:\$5556 (\$6060.38)                        |
| 18 |                             | secondary             |                              | pharmacy claims        | Other           | Disease state specific:                      |
| 19 |                             | hypoparathyroidism.   |                              | data                   | pharmacy        | TC:\$126996 (\$138524.78),                   |
| 20 |                             |                       |                              |                        | costs           | IC:\$14844 (\$16191.55),                     |
| 21 |                             |                       |                              |                        |                 | OC:\$101854 (\$111100.37),                   |
| 22 |                             |                       |                              |                        |                 | EDC:\$734 (\$800.63),                        |
| 23 |                             |                       |                              |                        |                 | PC:\$3244 (\$3538.49),                       |
| 24 |                             |                       |                              |                        |                 | OtPC:\$9564 (\$10432.23)                     |
| 25 |                             |                       |                              |                        |                 |                                              |
| 26 |                             |                       |                              |                        |                 |                                              |
| 27 | <b>Blood</b>                |                       |                              |                        |                 |                                              |
| 28 | <i>Candrilli et al</i> [74] | To investigate the    | <u>Design:</u> retrospective | <u>Measure:</u> MPR    | Total costs     | <u>Type of Costs:</u> adjusted               |
| 29 | 2011                        | relationships among   | longitudinal study           | <u>Classification:</u> | Inpatient costs | <u>Classification:</u> all cause and disease |
| 30 | US                          | hydroxyurea           | <u>Follow Up:</u> 12 months  | (≥80% = adherent,      | ED costs        | state specific                               |
| 31 |                             | adherence, healthcare | <u>Sample Size:</u> 312      | <80% =                 | Pharmacy        | <u>Currency Year:</u> USD, 2008              |
| 32 |                             | utilisation and       | (A:110, NA:202)              | nonadherent)           | costs           | <u>Cost of Nonadherence:</u>                 |
| 33 |                             | healthcare costs.     |                              | <u>Method of</u>       | Physician       | All cause:                                   |
| 34 |                             |                       |                              | <u>Assessment:</u>     | office visit    | TC:\$ 20436 (\$22734.83),                    |
| 35 |                             |                       |                              | pharmacy claims        | costs           | IC:\$9780 (\$10880.15),                      |
| 36 |                             |                       |                              | data                   | Ancillary costs | EDC:\$837 (\$931.15),                        |
| 37 |                             |                       |                              |                        |                 | PC:\$2579 (\$2869.11),                       |
| 38 |                             |                       |                              |                        |                 | POC:\$3483 (\$3874.80),                      |
| 39 |                             |                       |                              |                        |                 |                                              |
| 40 |                             |                       |                              |                        |                 |                                              |
| 41 |                             |                       |                              |                        |                 |                                              |
| 42 |                             |                       |                              |                        |                 |                                              |
| 43 |                             |                       |                              |                        |                 |                                              |
| 44 |                             |                       |                              |                        |                 |                                              |
| 45 |                             |                       |                              |                        |                 |                                              |
| 46 |                             |                       |                              |                        |                 |                                              |

1  
2  
3  
4  
5  
6  
7  
8  
9  
10  
11  
12  
13  
14  
15  
16  
17  
18  
19  
20  
21  
22  
23  
24  
25  
26  
27  
28  
29  
30  
31  
32  
33  
34  
35  
36  
37  
38  
39  
40  
41  
42  
43  
44  
45  
46

|                                             |                                                                                                                                                                   |                                                                                                                         |                                                                                                                                                                    |                       |                                                                                                                                                                                                             |                                                                        |
|---------------------------------------------|-------------------------------------------------------------------------------------------------------------------------------------------------------------------|-------------------------------------------------------------------------------------------------------------------------|--------------------------------------------------------------------------------------------------------------------------------------------------------------------|-----------------------|-------------------------------------------------------------------------------------------------------------------------------------------------------------------------------------------------------------|------------------------------------------------------------------------|
|                                             |                                                                                                                                                                   |                                                                                                                         |                                                                                                                                                                    |                       | AC:\$3911 (\$4350.95)<br>Disease state specific:<br>TC:\$12097 (\$13457.78),<br>IC:\$7315 (\$8137.86),<br>EDC:\$552 (\$614.09),<br>PC:\$158 (\$175.77),<br>POC:\$1865 (\$2074.79),<br>AC:\$2466 (\$2743.40) |                                                                        |
| <b>All</b>                                  |                                                                                                                                                                   |                                                                                                                         |                                                                                                                                                                    |                       |                                                                                                                                                                                                             |                                                                        |
| <i>Alvarez Payero et al</i> <sup>[75]</sup> | To determine the profile of patients who are admitted to hospital as a result of non-adherence and to obtain an estimate of the economic impact for the hospital. | <u>Design:</u> retrospective observational study<br><u>Follow Up:</u> 1527 days<br><u>Sample Size:</u> 87 (A:21, NA:66) | <u>Measure:</u> pharmacy records<br><u>Classification:</u> (>75% = adherent, ≤75% = nonadherent)<br><u>Method of Assessment:</u> pharmacy and hospital claims data | Hospitalization costs | <u>Type of Costs:</u> unadjusted<br><u>Classification:</u> all cause<br><u>Currency Year:</u> EUR, 2012<br><u>Cost of Nonadherence</u> <sup>####</sup> :<br>All cause:<br>HC:€6275.80 (\$8893.94)           | <u>Quality:</u> low<br><u>Classification:</u> cost outcome description |

A: adherent, NA: nonadherent, MA: moderate adherence, LA: low adherence, NC: noncompliance, NP: nonpersistent, P: persistent, T: turbulent, NE: no exposure, CHF: chronic heart failure, THC: total healthcare costs, TC: total costs, IC: inpatient costs, OC: outpatient costs, EDC: emergency department visit costs, PC: pharmacy costs, MC: medical costs, HC: hospitalization costs, POC: physician office visit costs, NPC: non-pharmacy costs, AC: ancillary costs, OtPC: other pharmacy costs, PAC: psychiatric assessment costs, TCMC: targeted case management costs, ArC: arrest costs, InC: incarceration costs, RC: radiology costs, SC: services costs, InstC: institutional costs, ESC: external services costs, MSC: medical services costs, PCC: primary care costs, MTC: medical test costs, FC: fracture costs, LC: laboratory costs, IntC: interdisciplinary costs, BHIC: behavioural health inpatient costs, STDC: short term disability costs, WCC: workers compensation costs, PTOC: paid time off costs, TPC: total productivity costs, AbC: absenteeism costs, PrC: presenteeism costs, OtC: other costs, com: commercial patients, med: Medicare supplemental patients, USD: United States dollar, GBP: Great British Pound, EUR: Euro, DKK: Danish krone, CAD: Canadian dollar, KRW: South Korean won

1  
2  
3 \*: extrapolated annual cost; \*\*: subgroups averaged; \*\*\*: national estimate of cost; \*\*\*\*: negative value as costs modelled against lowest adherence group;  
4 #: extrapolated annual cost and subgroups averaged; ##: cost represents losses in workplace productivity; ###: negative value as costs modelled against  
5 adherent group; ####: cost per episode of nonadherence  
6  
7  
8  
9  
10  
11  
12  
13  
14  
15  
16  
17  
18  
19  
20  
21  
22  
23  
24  
25  
26  
27  
28  
29  
30  
31  
32  
33  
34  
35  
36  
37  
38  
39  
40  
41  
42  
43  
44  
45  
46

For peer review only

- 1
- 2
- 3
- 4 1. Aubert RE, Yao J, Xia F, et al. Is there a relationship between early statin compliance and a reduction in healthcare utilization? *The American journal of managed care* 2010;**16**:459-66
- 5
- 6 2. Casciano JP, Dotiwala ZJ, Martin BC, et al. The costs of warfarin underuse and nonadherence in patients with atrial fibrillation: a commercial insurer perspective. *Journal of managed care pharmacy : JMCP* 2013;**19**:302-16
- 7
- 8 3. Dilokthornsakul P, Chaiyakunapruk N, Nimpitakpong P, et al. The Effects of Medication Supply on Hospitalizations and Health-Care Costs in Patients with Chronic Heart Failure. *Value in Health* 2012;**15**:S9-S14 doi: 10.1016/j.jval.2011.11.019[published Online First: Epub Date]].
- 9
- 10 4. Dragomir A, Côté R, Roy L, et al. Impact of adherence to antihypertensive agents on clinical outcomes and hospitalization costs. *Medical care* 2010;**48**:418-25 doi: 10.1097/MLR.0b013e3181d567bd[published Online First: Epub Date]].
- 11
- 12 5. Dragomir A, Cote R, White M, et al. Relationship between adherence level to statins, clinical issues and health-care costs in real-life clinical setting. *Value in health : the journal of the International Society for Pharmacoeconomics and Outcomes Research* 2010;**13**(1):87-94 doi: 10.1111/j.1524-4733.2009.00583.x[published Online First: Epub Date]].
- 13
- 14 6. Pittman DG, Chen W, Bowlin SJ, et al. Adherence to statins, subsequent healthcare costs, and cardiovascular hospitalizations. *The American journal of cardiology* 2011;**107**:1662-6 doi: 10.1016/j.amjcard.2011.01.052[published Online First: Epub Date]].
- 15
- 16 7. Pittman DG, Tao Z, Chen W, et al. Antihypertensive medication adherence and subsequent healthcare utilization and costs. *The American journal of managed care* 2010;**16**:568-76
- 17
- 18 8. Rizzo JAS, W. R. Variations in compliance among hypertensive patients by drug class: implications for health care costs. *Clinical therapeutics* 1997;**19**(6):1446-57; discussion 24-5
- 19
- 20 9. Sokol MC, McGuigan KA, Verbrugge RR, et al. Impact of medication adherence on hospitalization risk and healthcare cost. *Medical care* 2005;**43**:521-30
- 21
- 22 10. Stroupe KT, Teal EY, Tu W, et al. Association of Refill Adherence and Health Care Use Among Adults with Hypertension in an Urban Health Care System. *Pharmacotherapy* 2006;**26**:779-89 doi: 10.1592/phco.26.6.779[published Online First: Epub Date]].
- 23
- 24 11. Wu J, Seiber E, Lacombe VA, et al. Medical utilization and costs associated with statin adherence in Medicaid enrollees with type 2 diabetes. *The Annals of pharmacotherapy* 2011;**45**:342-9 doi: 10.1345/aph.1P539[published Online First: Epub Date]].
- 25
- 26 12. Zhao Y, Zabriski S, Bertram C. Associations between statin adherence level, health care costs, and utilization. *Journal of managed care & specialty pharmacy* 2014;**20**:703-13
- 27
- 28 13. Bagalman E, Yu-Isenberg KS, Durden E, et al. Indirect costs associated with nonadherence to treatment for bipolar disorder. *Journal of occupational and environmental medicine / American College of Occupational and Environmental Medicine* 2010;**52**:478-85 doi: 10.1097/JOM.0b013e3181db811d[published Online First: Epub Date]].
- 29
- 30 14. Becker MA, Young MS, Ochshorn E, et al. The relationship of antipsychotic medication class and adherence with treatment outcomes and costs for Florida Medicaid beneficiaries with schizophrenia. *Administration and policy in mental health* 2007;**34**:307-14 doi: 10.1007/s10488-006-0108-5[published Online First: Epub Date]].
- 31
- 32 15. Eaddy M, Grogg A, Locklear J. Assessment of compliance with antipsychotic treatment and resource utilization in a Medicaid population. *Clinical therapeutics* 2005;**27**:263-72 doi: 10.1016/j.clinthera.2005.02.003[published Online First: Epub Date]].
- 33
- 34
- 35
- 36
- 37
- 38
- 39
- 40
- 41
- 42
- 43
- 44
- 45
- 46

16. Gilmer TP, Dolder CR, Lacro JP, et al. Adherence to treatment with antipsychotic medication and health care costs among Medicaid beneficiaries with schizophrenia. *The American journal of psychiatry* 2004;**161**:692-9
17. Hong J, Reed C, Novick D, et al. Clinical and economic consequences of medication non-adherence in the treatment of patients with a manic/mixed episode of bipolar disorder: results from the European Mania in Bipolar Longitudinal Evaluation of Medication (EMBLEM) study. *Psychiatry research* 2011;**190**:110-4 doi: 10.1016/j.psychres.2011.04.016[published Online First: Epub Date]|.
18. Jiang Y, Ni W. Estimating the Impact of Adherence to and Persistence with Atypical Antipsychotic Therapy on Health Care Costs and Risk of Hospitalization. *Pharmacotherapy* 2015;**35**(9):813-22 doi: 10.1002/phar.1634[published Online First: Epub Date]|.
19. Joe S, Lee JS. Association between non-compliance with psychiatric treatment and non-psychiatric service utilization and costs in patients with schizophrenia and related disorders. *BMC psychiatry* 2016;**16**(1):444 doi: 10.1186/s12888-016-1156-3[published Online First: Epub Date]|.
20. Knapp M, King D, Pugner K, et al. Non-adherence to antipsychotic medication regimens: associations with resource use and costs. *The British journal of psychiatry : the journal of mental science* 2004;**184**:509-16
21. Offord S, Lin J, Mirski D, et al. Impact of early nonadherence to oral antipsychotics on clinical and economic outcomes among patients with schizophrenia. *Advances in therapy* 2013;**30**:286-97 doi: 10.1007/s12325-013-0016-5[published Online First: Epub Date]|.
22. Offord S, Lin J, Wong B, et al. Impact of oral antipsychotic medication adherence on healthcare resource utilization among schizophrenia patients with Medicare coverage. *Community mental health journal* 2013;**49**:625-9 doi: 10.1007/s10597-013-9638-y[published Online First: Epub Date]|.
23. Robertson AG, Swanson JW, Van Dorn RA, et al. Treatment participation and medication adherence: effects on criminal justice costs of persons with mental illness. *Psychiatric services (Washington, DC)* 2014;**65**(10):1189-91 doi: 10.1176/appi.ps.201400247[published Online First: Epub Date]|.
24. Robinson RL, Long SR, Chang S, et al. Higher costs and therapeutic factors associated with adherence to NCQA HEDIS antidepressant medication management measures: analysis of administrative claims. *Journal of managed care pharmacy : JMCP* 2006;**12**:43-54
25. Svarstad BL, Shireman TI, Sweeney JK. Using drug claims data to assess the relationship of medication adherence with hospitalization and costs. *Psychiatric services (Washington, DC)* 2001;**52**:805-11
26. White TJV, Ann; Ory, Caron; Dezii, Christopher M.; Chang, Eunice. Economic Impact of Patient Adherence with Antidepressant Therapy Within a Managed Care Organization. *Disease Management & Health Outcomes* 2003;**11**(12):817-22 doi: 10.2165/00115677-200311120-00006[published Online First: Epub Date]|.
27. An S-Y, Kim HJ, Chun KH, et al. Clinical and economic outcomes in medication-adherent and -nonadherent patients with type 2 diabetes mellitus in the Republic of Korea. *Clinical therapeutics* 2014;**36**:245-54 doi: 10.1016/j.clinthera.2013.12.012[published Online First: Epub Date]|.
28. Egede LE, Gebregziabher M, Dismuke CE, et al. Medication Nonadherence in Diabetes: Longitudinal effects on costs and potential cost savings from improvement. *Diabetes care* 2012;**35**:2533-39 doi: 10.2337/dc12-0572[published Online First: Epub Date]|.
29. Gentil L, Vasiliadis HM, Preville M, et al. Adherence to Oral Antihyperglycemic Agents Among Older Adults With Mental Disorders and Its Effect on Health Care Costs, Quebec, Canada, 2005-2008. *Preventing chronic disease* 2015;**12**:E230 doi: 10.5888/pcd12.150412[published Online First: Epub Date]|.
30. Hagen SE, Wright DW, Finch R, et al. Impact of compliance to oral hypoglycemic agents on short-term disability costs in an employer population. *Population health management* 2014;**17**:35-41 doi: 10.1089/pop.2013.0009[published Online First: Epub Date]|.

31. Hansen RA, Farley JF, Droege M, et al. A retrospective cohort study of economic outcomes and adherence to monotherapy with metformin, pioglitazone, or a sulfonyleurea among patients with type 2 diabetes mellitus in the United States from 2003 to 2005. *Clinical therapeutics* 2010;**32**:1308-19 doi: 10.1016/j.clinthera.2010.07.011[published Online First: Epub Date]].
32. Hong JS, Kang HC. Relationship between oral antihyperglycemic medication adherence and hospitalization, mortality, and healthcare costs in adult ambulatory care patients with type 2 diabetes in South Korea. *Medical care* 2011;**49**:378-84 doi: 10.1097/MLR.0b013e31820292d1[published Online First: Epub Date]].
33. Jha AK, Aubert RE, Yao J, et al. Greater adherence to diabetes drugs is linked to less hospital use and could save nearly \$5 billion annually. *Health affairs (Project Hope)* 2012;**31**:1836-46 doi: 10.1377/hlthaff.2011.1198[published Online First: Epub Date]].
34. White TJV, Ann; Chang, Eunice; Dezii, Christopher M.; Abrams, Geoffrey D. The Costs of Non-Adherence to Oral Antihyperglycemic Medication in Individuals with Diabetes Mellitus and Concomitant Diabetes Mellitus and Cardiovascular Disease in a Managed Care Environment. *Disease Management & Health Outcomes* 2004;**12**(3):181-88 doi: 10.2165/00115677-200412030-00004[published Online First: Epub Date]].
35. Wu N, Chen S, Boulanger L, et al. Duloxetine compliance and its association with healthcare costs among patients with diabetic peripheral neuropathic pain. *Journal of medical economics* 2009;**12**:192-202 doi: 10.3111/13696990903240559[published Online First: Epub Date]].
36. Briesacher BA, Andrade SE, Yood RA, et al. Consequences of poor compliance with bisphosphonates. *Bone* 2007;**41**:882-7 doi: 10.1016/j.bone.2007.07.009[published Online First: Epub Date]].
37. Eisenberg DF, Placzek H, Gu T, et al. Cost and consequences of noncompliance to oral bisphosphonate treatment. *Journal of managed care & specialty pharmacy* 2015;**21**(1):56-65 doi: 10.18553/jmcp.2015.21.1.56[published Online First: Epub Date]].
38. Halpern R, Becker L, Iqbal SU, et al. The association of adherence to osteoporosis therapies with fracture, all-cause medical costs, and all-cause hospitalizations: a retrospective claims analysis of female health plan enrollees with osteoporosis. *Journal of managed care pharmacy : JMCP* 2011;**17**:25-39
39. Hazel-Fernandez L, Louder AM, Foster SA, et al. Association of teriparatide adherence and persistence with clinical and economic outcomes in Medicare Part D recipients: a retrospective cohort study. *BMC musculoskeletal disorders* 2013;**14**:4 doi: 10.1186/1471-2474-14-4[published Online First: Epub Date]].
40. Huybrechts KF, Ishak KJ, Caro JJ. Assessment of compliance with osteoporosis treatment and its consequences in a managed care population. *Bone* 2006;**38**:922-8 doi: 10.1016/j.bone.2005.10.022[published Online First: Epub Date]].
41. Kjellberg J, Jorgensen AD, Vestergaard P, et al. Cost and health care resource use associated with noncompliance with oral bisphosphonate therapy: an analysis using Danish health registries. *Osteoporosis International* 2016;**27**(12):3535-41 doi: 10.1007/s00198-016-3683-7[published Online First: Epub Date]].
42. Modi A, Siris ES, Tang J, et al. Cost and consequences of noncompliance with osteoporosis treatment among women initiating therapy. *Current medical research and opinion* 2015;**31**(4):757-65 doi: 10.1185/03007995.2015.1016605[published Online First: Epub Date]].
43. Olsen KR, Hansen C, Abrahamsen B. Association between refill compliance to oral bisphosphonate treatment, incident fractures, and health care costs--an analysis using national health databases. *Osteoporosis international : a journal established as result of cooperation between the European*

- 1  
2  
3 Foundation for Osteoporosis and the National Osteoporosis Foundation of the USA 2013;**24**:2639-47 doi: 10.1007/s00198-013-2365-y[published  
4 Online First: Epub Date]].
- 5 44. Sunycz JA, Mucha L, Baser O, et al. Impact of compliance and persistence with bisphosphonate therapy on health care costs and utilization.  
6 Osteoporosis international : a journal established as result of cooperation between the European Foundation for Osteoporosis and the National  
7 Osteoporosis Foundation of the USA 2008;**19**:1421-9 doi: 10.1007/s00198-008-0586-2[published Online First: Epub Date]].
- 8 45. Zhao Y, Johnston SS, Smith DM, et al. Association between teriparatide adherence and healthcare utilization and costs among hip fracture patients in  
9 the United States. Bone 2014;**60**:221-6 doi: 10.1016/j.bone.2013.12.016[published Online First: Epub Date]].
- 10 46. Zhao Y, Johnston SS, Smith DM, et al. Association between teriparatide adherence and healthcare utilization and costs in real-world US  
11 kyphoplasty/vertebroplasty patients. Osteoporosis International 2013;**24**:2525-33 doi: 10.1007/s00198-013-2324-7[published Online First: Epub  
12 Date]].
- 13 47. Delea TE, Stanford RH, Hagiwara M, et al. Association between adherence with fixed dose combination fluticasone propionate/salmeterol on asthma  
14 outcomes and costs\*. Current medical research and opinion 2008;**24**:3435-42 doi: 10.1185/03007990802557344[published Online First: Epub  
15 Date]].
- 16 48. Diehl JL, Daw JR, Coley KC, et al. Medical utilization associated with palivizumab compliance in a commercial and managed medicaid health plan. Journal  
17 of managed care pharmacy : JMCP 2010;**16**:23-31
- 18 49. Joshi AV, Madhavan SS, Ambegaonkar A, et al. Association of medication adherence with workplace productivity and health-related quality of life in  
19 patients with asthma. The Journal of asthma : official journal of the Association for the Care of Asthma 2006;**43**:521-6 doi:  
20 10.1080/02770900600857010[published Online First: Epub Date]].
- 21 50. Miravittles M, Sicras A, Crespo C, et al. Costs of chronic obstructive pulmonary disease in relation to compliance with guidelines: a study in the primary  
22 care setting. Therapeutic advances in respiratory disease 2013;**7**:139-50 doi: 10.1177/1753465813484080[published Online First: Epub Date]].
- 23 51. Quittner AL, Zhang J, Marynchenko M, et al. Pulmonary medication adherence and health-care use in cystic fibrosis. Chest 2014;**146**:142-51 doi:  
24 10.1378/chest.13-1926[published Online First: Epub Date]].
- 25 52. Carter CT, Waters HC, Smith DB. Impact of infliximab adherence on Crohn's disease-related healthcare utilization and inpatient costs. Advances in  
26 therapy 2011;**28**:671-83 doi: 10.1007/s12325-011-0048-7[published Online First: Epub Date]].
- 27 53. Gosselin A, Luo R, Lohoues H, et al. The impact of proton pump inhibitor compliance on health-care resource utilization and costs in patients with  
28 gastroesophageal reflux disease. Value in health : the journal of the International Society for Pharmacoeconomics and Outcomes Research  
29 2009;**12**:34-9 doi: 10.1111/j.1524-4733.2008.00399.x[published Online First: Epub Date]].
- 30 54. Kane SV, Chao J, Mulani PM. Adherence to infliximab maintenance therapy and health care utilization and costs by Crohn's disease patients. Advances in  
31 therapy 2009;**26**:936-46 doi: 10.1007/s12325-009-0069-7[published Online First: Epub Date]].
- 32 55. Mitra D, Hodgkins P, Yen L, et al. Association between oral 5-ASA adherence and health care utilization and costs among patients with active ulcerative  
33 colitis. BMC gastroenterology 2012;**12**:132 doi: 10.1186/1471-230X-12-132[published Online First: Epub Date]].
- 34 56. Wan GJ, Kozma CM, Slaton TL, et al. Inflammatory bowel disease: healthcare costs for patients who are adherent or non-adherent with infliximab  
35 therapy. Journal of medical economics 2014;**17**:384-93 doi: 10.3111/13696998.2014.909436[published Online First: Epub Date]].
- 36  
37  
38  
39  
40  
41  
42  
43  
44  
45  
46

- 1  
2  
3 57. Davis KLC, S. D.; Edin, H. M. Prevalence and cost of nonadherence with antiepileptic drugs in an adult managed care population. *Epilepsia*  
4 2008;**49**(3):446-54 doi: 10.1111/j.1528-1167.2007.01414.x[published Online First: Epub Date] |.
- 5 58. Ettinger AB, Manjunath R, Candrilli SD, et al. Prevalence and cost of nonadherence to antiepileptic drugs in elderly patients with epilepsy. *Epilepsy &*  
6 *behavior : E&B* 2009;**14**:324-9 doi: 10.1016/j.yebeh.2008.10.021[published Online First: Epub Date] |.
- 7 59. Fought RE, Weiner JR, Guérin A, et al. Impact of nonadherence to antiepileptic drugs on health care utilization and costs: findings from the RANSOM  
8 study. *Epilepsia* 2009;**50**:501-9 doi: 10.1111/j.1528-1167.2008.01794.x[published Online First: Epub Date] |.
- 9 60. Barnett PG, Chow A, Joyce VR, et al. Determinants of the Cost of Health Services Used by Veterans With HIV. *Medical care* 2011;**49**:848-56 doi:  
10 10.1097/MLR.0b013e31821b34c0[published Online First: Epub Date] |.
- 11 61. Cooke CE, Lee HY, Xing S. Adherence to antiretroviral therapy in managed care members in the United States: a retrospective claims analysis. *Journal of*  
12 *managed care pharmacy : JMCP* 2014;**20**:86-92
- 13 62. Pruitt Z, Robst J, Langland-Orban B, et al. Healthcare costs associated with antiretroviral adherence among medicaid patients. *Applied health economics*  
14 *and health policy* 2015;**13**:69-80 doi: 10.1007/s40258-014-0138-1[published Online First: Epub Date] |.
- 15 63. Davis KL, Edin HM, Allen JK. Prevalence and cost of medication nonadherence in Parkinson's disease: evidence from administrative claims data.  
16 *Movement disorders : official journal of the Movement Disorder Society* 2010;**25**(4):474-80 doi: 10.1002/mds.22999[published Online First: Epub  
17 Date] |.
- 18 64. Delea TE, Thomas SK, Hagiwara M. The association between adherence to levodopa/carbidopa/entacapone therapy and healthcare utilization and costs  
19 among patients with Parkinson's disease: a retrospective claims-based analysis. *CNS drugs* 2011;**25**:53-66 doi: 10.2165/11538970-000000000-  
20 00000[published Online First: Epub Date] |.
- 21 65. Wei Y-J, Palumbo FB, Simoni-Wastila L, et al. Antiparkinson drug adherence and its association with health care utilization and economic outcomes in a  
22 Medicare Part D population. *Value in health : the journal of the International Society for Pharmacoeconomics and Outcomes Research* 2014;**17**:196-  
23 204 doi: 10.1016/j.jval.2013.12.003[published Online First: Epub Date] |.
- 24 66. Ivanova JI, Bergman RE, Birnbaum HG, et al. Impact of medication adherence to disease-modifying drugs on severe relapse, and direct and indirect costs  
25 among employees with multiple sclerosis in the US. *Journal of medical economics* 2012;**15**:601-9 doi: 10.3111/13696998.2012.667027[published  
26 Online First: Epub Date] |.
- 27 67. Tan H, Cai Q, Agarwal S, et al. Impact of adherence to disease-modifying therapies on clinical and economic outcomes among patients with multiple  
28 sclerosis. *Advances in therapy* 2011;**28**:51-61 doi: 10.1007/s12325-010-0093-7[published Online First: Epub Date] |.
- 29 68. Zhao Y, Chen S-Y, Wu N, et al. Medication Adherence and Healthcare Costs among Fibromyalgia Patients Treated with Duloxetine. *Pain Practice*  
30 2011;**11**:381-91 doi: 10.1111/j.1533-2500.2010.00431.x[published Online First: Epub Date] |.
- 31 69. Darkow T, Henk HJ, Thomas SK, et al. Treatment interruptions and non-adherence with imatinib and associated healthcare costs: a retrospective  
32 analysis among managed care patients with chronic myelogenous leukaemia. *Pharmacoeconomics* 2007;**25**:481-96
- 33 70. Wu EQ, Johnson S, Beaulieu N, et al. Healthcare resource utilization and costs associated with non-adherence to imatinib treatment in chronic myeloid  
34 leukemia patients. *Current medical research and opinion* 2010;**26**:61-69 doi: 10.1185/03007990903396469[published Online First: Epub Date] |.
- 35  
36  
37  
38  
39  
40  
41  
42  
43  
44  
45  
46



- 1  
2  
3 71. Leider HL, Dhaliwal J, Davis EJ, et al. Healthcare costs and nonadherence among chronic opioid users. *The American journal of managed care*  
4 2011;**17**:32-40  
5  
6 72. Tkacz J, Volpicelli J, Un H, et al. Relationship between buprenorphine adherence and health service utilization and costs among opioid dependent  
7 patients. *Journal of substance abuse treatment* 2014;**46**:456-62 doi: 10.1016/j.jsat.2013.10.014[published Online First: Epub Date] |.  
8  
9 73. Lee A, Song X, Khan I, et al. Association of cinacalcet adherence and costs in patients on dialysis. *Journal of medical economics* 2011;**14**:798-804 doi:  
10 10.3111/13696998.2011.627404[published Online First: Epub Date] |.  
11  
12 74. Candrilli SD, O'Brien SH, Ware RE, et al. Hydroxyurea adherence and associated outcomes among Medicaid enrollees with sickle cell disease. *American*  
13 *journal of hematology* 2011;**86**:273-7 doi: 10.1002/ajh.21968[published Online First: Epub Date] |.  
14  
15 75. Alvarez Payero M, Martinez Lopez de Castro N, Ucha Samartin M, et al. Medication non-adherence as a cause of hospital admissions. *Farmacia*  
16 *hospitalaria : organo oficial de expresion cientifica de la Sociedad Espanola de Farmacia Hospitalaria* 2014;**38**(4):328-33 doi:  
17 10.7399/fh.2014.38.4.7660[published Online First: Epub Date] |.  
18  
19  
20  
21  
22  
23  
24  
25  
26  
27  
28  
29  
30  
31  
32  
33  
34  
35  
36  
37  
38  
39  
40  
41  
42  
43  
44  
45  
46

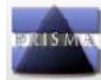

# PRISMA 2009 Checklist

1  
2  
3  
4  
5  
6  
7  
8  
9  
10  
11  
12  
13  
14  
15  
16  
17  
18  
19  
20  
21  
22  
23  
24  
25  
26  
27  
28  
29  
30  
31  
32  
33  
34  
35  
36  
37  
38  
39  
40  
41  
42  
43  
44  
45  
46  
47

| Section/topic                      | #  | Checklist item                                                                                                                                                                                                                                                                                              | Reported on page # |
|------------------------------------|----|-------------------------------------------------------------------------------------------------------------------------------------------------------------------------------------------------------------------------------------------------------------------------------------------------------------|--------------------|
| <b>TITLE</b>                       |    |                                                                                                                                                                                                                                                                                                             |                    |
| Title                              | 1  | Identify the report as a systematic review, meta-analysis, or both.                                                                                                                                                                                                                                         |                    |
| <b>ABSTRACT</b>                    |    |                                                                                                                                                                                                                                                                                                             |                    |
| Structured summary                 | 2  | Provide a structured summary including, as applicable: background; objectives; data sources; study eligibility criteria, participants, and interventions; study appraisal and synthesis methods; results; limitations; conclusions and implications of key findings; systematic review registration number. |                    |
| <b>INTRODUCTION</b>                |    |                                                                                                                                                                                                                                                                                                             |                    |
| Rationale                          | 3  | Describe the rationale for the review in the context of what is already known.                                                                                                                                                                                                                              |                    |
| Objectives                         | 4  | Provide an explicit statement of questions being addressed with reference to participants, interventions, comparisons, outcomes, and study design (PICOS).                                                                                                                                                  |                    |
| <b>METHODS</b>                     |    |                                                                                                                                                                                                                                                                                                             |                    |
| Protocol and registration          | 5  | Indicate if a review protocol exists, if and where it can be accessed (e.g., Web address), and, if available, provide registration information including registration number.                                                                                                                               |                    |
| Eligibility criteria               | 6  | Specify study characteristics (e.g., PICOS, length of follow-up) and report characteristics (e.g., years considered, language, publication status) used as criteria for eligibility, giving rationale.                                                                                                      |                    |
| Information sources                | 7  | Describe all information sources (e.g., databases with dates of coverage, contact with study authors to identify additional studies) in the search and date last searched.                                                                                                                                  |                    |
| Search                             | 8  | Present full electronic search strategy for at least one database, including any limits used, such that it could be repeated.                                                                                                                                                                               |                    |
| Study selection                    | 9  | State the process for selecting studies (i.e., screening, eligibility, included in systematic review, and, if applicable, included in the meta-analysis).                                                                                                                                                   |                    |
| Data collection process            | 10 | Describe method of data extraction from reports (e.g., piloted forms, independently, in duplicate) and any processes for obtaining and confirming data from investigators.                                                                                                                                  |                    |
| Data items                         | 11 | List and define all variables for which data were sought (e.g., PICOS, funding sources) and any assumptions and simplifications made.                                                                                                                                                                       |                    |
| Risk of bias in individual studies | 12 | Describe methods used for assessing risk of bias of individual studies (including specification of whether this was done at the study or outcome level), and how this information is to be used in any data synthesis.                                                                                      |                    |
| Summary measures                   | 13 | State the principal summary measures (e.g., risk ratio, difference in means).                                                                                                                                                                                                                               |                    |
| Synthesis of results               | 14 | Describe the methods of handling data and combining results of studies, if done, including measures of consistency (e.g., $I^2$ ) for each meta-analysis.                                                                                                                                                   |                    |



# PRISMA 2009 Checklist

| Section/topic                 | #  | Checklist item                                                                                                                                                                                           | Reported on page # |
|-------------------------------|----|----------------------------------------------------------------------------------------------------------------------------------------------------------------------------------------------------------|--------------------|
| Risk of bias across studies   | 15 | Specify any assessment of risk of bias that may affect the cumulative evidence (e.g., publication bias, selective reporting within studies).                                                             |                    |
| Additional analyses           | 16 | Describe methods of additional analyses (e.g., sensitivity or subgroup analyses, meta-regression), if done, indicating which were pre-specified.                                                         |                    |
| <b>RESULTS</b>                |    |                                                                                                                                                                                                          |                    |
| Study selection               | 17 | Give numbers of studies screened, assessed for eligibility, and included in the review, with reasons for exclusions at each stage, ideally with a flow diagram.                                          |                    |
| Study characteristics         | 18 | For each study, present characteristics for which data were extracted (e.g., study size, PICOS, follow-up period) and provide the citations.                                                             |                    |
| Risk of bias within studies   | 19 | Present data on risk of bias of each study and, if available, any outcome level assessment (see item 12).                                                                                                |                    |
| Results of individual studies | 20 | For all outcomes considered (benefits or harms), present, for each study: (a) simple summary data for each intervention group (b) effect estimates and confidence intervals, ideally with a forest plot. |                    |
| Synthesis of results          | 21 | Present results of each meta-analysis done, including confidence intervals and measures of consistency.                                                                                                  |                    |
| Risk of bias across studies   | 22 | Present results of any assessment of risk of bias across studies (see Item 15).                                                                                                                          |                    |
| Additional analysis           | 23 | Give results of additional analyses, if done (e.g., sensitivity or subgroup analyses, meta-regression [see Item 16]).                                                                                    |                    |
| <b>DISCUSSION</b>             |    |                                                                                                                                                                                                          |                    |
| Summary of evidence           | 24 | Summarize the main findings including the strength of evidence for each main outcome; consider their relevance to key groups (e.g., healthcare providers, users, and policy makers).                     |                    |
| Limitations                   | 25 | Discuss limitations at study and outcome level (e.g., risk of bias), and at review-level (e.g., incomplete retrieval of identified research, reporting bias).                                            |                    |
| Conclusions                   | 26 | Provide a general interpretation of the results in the context of other evidence, and implications for future research.                                                                                  |                    |
| <b>FUNDING</b>                |    |                                                                                                                                                                                                          |                    |
| Funding                       | 27 | Describe sources of funding for the systematic review and other support (e.g., supply of data); role of funders for the systematic review.                                                               |                    |

From: Moher D, Liberati A, Tetzlaff J, Altman DG, The PRISMA Group (2009). Preferred Reporting Items for Systematic Reviews and Meta-Analyses: The PRISMA Statement. PLoS Med 6(7): e1000097. doi:10.1371/journal.pmed1000097

For more information, visit: [www.prisma-statement.org](http://www.prisma-statement.org).

# BMJ Open

## Economic impact of medication nonadherence by disease groups: a systematic review

|                                 |                                                                                                                                                                                                                                                                                                                                                                                                                                                                                                           |
|---------------------------------|-----------------------------------------------------------------------------------------------------------------------------------------------------------------------------------------------------------------------------------------------------------------------------------------------------------------------------------------------------------------------------------------------------------------------------------------------------------------------------------------------------------|
| Journal:                        | <i>BMJ Open</i>                                                                                                                                                                                                                                                                                                                                                                                                                                                                                           |
| Manuscript ID                   | bmjopen-2017-016982.R2                                                                                                                                                                                                                                                                                                                                                                                                                                                                                    |
| Article Type:                   | Research                                                                                                                                                                                                                                                                                                                                                                                                                                                                                                  |
| Date Submitted by the Author:   | 11-Oct-2017                                                                                                                                                                                                                                                                                                                                                                                                                                                                                               |
| Complete List of Authors:       | Cutler, Rachele; University of Technology, Sydney, Australia, Graduate School of Health; Pharmacy<br>Fernandez-Llimos, Fernando; Universidade de Lisboa Instituto de Investigacao do Medicamento, Social Pharmacy<br>Frommer, Michael; University of Sydney Sydney Medical School, Sydney Medical School<br>Benrimoj, Charlie; University of Technology, Sydney, graduate school of health<br>Garcia Cardenas, Victoria; University of Technology, Sydney, Australia, Graduate School of Health; Pharmacy |
| <b>Primary Subject Heading</b>: | Health services research                                                                                                                                                                                                                                                                                                                                                                                                                                                                                  |
| Secondary Subject Heading:      | Global health, Health economics, Health policy, Public health                                                                                                                                                                                                                                                                                                                                                                                                                                             |
| Keywords:                       | Health economics < HEALTH SERVICES ADMINISTRATION & MANAGEMENT, Health policy < HEALTH SERVICES ADMINISTRATION & MANAGEMENT, Quality in health care < HEALTH SERVICES ADMINISTRATION & MANAGEMENT, PUBLIC HEALTH, adherence                                                                                                                                                                                                                                                                               |
|                                 |                                                                                                                                                                                                                                                                                                                                                                                                                                                                                                           |

SCHOLARONE™  
Manuscripts

**Title Page**

**Title:** Economic impact of medication nonadherence by disease groups: a systematic review

**Authors:**

Rachelle L Cutler  
Graduate School of Health  
University of Technology Sydney, Sydney  
Australia

Fernando Fernandez-Llimos  
Research Institute for Medicines (iMed.Ulisboa), Department of Social Pharmacy  
Faculty of Pharmacy, University of Lisbon, Lisbon  
Portugal

Michael Frommer  
Sydney Medical School  
The University of Sydney  
Australia

Shalom I (Charlie) Benrimoj  
Graduate School of Health  
University of Technology Sydney, Sydney  
Australia

Victoria Garcia-Cardenas  
Graduate School of Health  
University of Technology Sydney, Sydney  
Australia

**Corresponding Author:**

Rachelle L Cutler  
Graduate School of Health  
University of Technology Sydney  
City Campus, Broadway, Building 7, Lvl 4, Room 04.02182  
PO Box 123, Broadway NSW 2007 Australia  
rachelle.cutler@uts.edu.au  
+61 2 95147187

**Word Count:**

5967

**Abstract**

**Objective:** To determine the economic impact of medication nonadherence across multiple disease groups.

**Design:** Systematic review.

**Evidence Review:** A comprehensive literature search was conducted in PubMed and Scopus in September 2017. Studies quantifying the cost of medication nonadherence in relation to economic impact were included. Relevant information was extracted and quality assessed using the Drummond checklist.

**Results:** Seventy nine individual studies assessing the cost of medication nonadherence across fourteen disease groups were included. Wide scoping cost variations were reported, with lower levels of adherence generally associated with higher total costs. The annual adjusted disease specific economic cost of nonadherence per person ranged from \$949-\$44,190 (in 2015 US dollars). Costs attributed to “all causes” nonadherence ranged from \$5,271 to \$52,341. Medication possession ratio was the metric most utilized to calculate patient adherence, with varying cut-off points defining nonadherence. The main indicators used to measure the cost of nonadherence were total cost or total healthcare cost (83% of studies), pharmacy costs (70%), inpatient costs (46%), outpatient costs (50%), emergency department visit costs (27%), medical costs (29%) and hospitalization costs (18%). Drummond quality assessment yielded 10 studies of high quality with all studies performing partial economic evaluations to varying extents.

**Conclusion:** Medication nonadherence places a significant cost burden on healthcare systems. Current research assessing the economic impact of medication nonadherence is limited and of varying quality, failing to provide adaptable data to influence health policy. The correlation between increased nonadherence and higher disease prevalence should be used to inform policy makers to help circumvent avoidable costs to the healthcare system. Differences in methods make the comparison amongst studies challenging and an accurate estimation of true magnitude of the cost impossible. Standardization of the metric measures used to estimate medication nonadherence and development of a streamlined approach to quantify costs is required.

**Registration:** CRD42015027338

**Strengths and Limitations of this study:**

- This is a novel attempt to use existing studies to broaden the scope of knowledge associated with the economic impact of medication nonadherence via quantifying the cost of medication nonadherence across different disease groups.
- A large comprehensive review – 2,768 citations identified, 79 studies included.
- Inability to perform a meaningful meta-analysis- insufficient statistical data and considerable heterogeneity according to outcome/indicators.
- Robust application of adapted Drummond checklist to evaluate the quality of economic evaluations.

## 1 Introduction

Nearly half of all adults and approximately 8% of children (aged 5-17 years) worldwide have a chronic condition[1]. This, together with ageing populations, is increasing the demand on healthcare resources[2]. Medications represent a cost-effective treatment modality[3], but with estimates of 50% nonadherence to long term therapy for chronic illnesses[4], intentional and unintentional medication nonadherence signifies a prevalent and persistent healthcare problem. Medication adherence is defined as 'the extent to which the patients' behavior matches agreed recommendations from the prescriber', emphasizing the importance on the patients' decisions and highlighting the modifiable aspect of nonadherence[5].

Given the proportion of the population who do not adhere to their medication efforts to improve medication adherence represent an opportunity to enhance health outcomes and health system efficiency. Annual costings of medication nonadherence range from US\$100-\$290 billion[6] in the United States, €1.25 billion[7] in Europe and approximately A\$7 billion[8 9] in Australia. Additionally ten percent of hospitalizations in older adults are attributed to medication nonadherence [10 11] with the typical nonadherent patient requiring three extra medical visits per year leading to \$2000 increased treatment costs per annum[12]. In diabetes the estimated costs savings associated with improving medication nonadherence range from \$661 million to \$1.16 billion [13]. Nonadherence is thus a critical clinical and economic problem[4].

Addressing the economic impact of medication nonadherence provides an opportunity for policy makers to help loosen the ever tightening constraints placed on health budgets. Healthcare reformers and payers have repeatedly relied on cost effectiveness analysis to help healthcare systems deal with the rising costs of care[14]. However there is still a budgetary problem that needs to be considered, especially given the widespread policy debate over how to best bend the healthcare cost curve downward[15] and the proportion of healthcare budgets spent on prescription medication[16]. Quantifying the cost of medication nonadherence will help demonstrate the causal effect between medication nonadherence, increased disease prevalence and healthcare resource use. Justification of the associated financial benefit may incentivize health policy discussion about the value of medication adherence and promote the adoption of medication adherence intervention programs [15].

The objective of this systematic review was, first, to determine the economic impact of medication nonadherence across multiple disease groups, and second, to review and critically appraise the



1  
2  
3  
4  
5  
6  
7  
8  
9  
10  
11  
12  
13  
14  
15  
16  
17  
18  
19  
20  
21  
22  
23  
24  
25  
26  
27  
28  
29  
30  
31  
32  
33  
34  
35  
36  
37  
38  
39  
40  
41  
42  
43  
44  
45  
46  
47  
48  
49  
50  
51  
52  
53  
54  
55  
56  
57  
58  
59  
60

literature to identify the main methodological issues that may explain the differences among reports in the cost calculation and classification of nonadherence.

For peer review only

## 2 Methods

The protocol for this systematic review was registered on the PROSPERO: International prospective register of systematic reviews database (CRD42015027338) and can be accessed at [http://www.crd.york.ac.uk/PROSPERO/display\\_record.asp?ID=CRD42015027338](http://www.crd.york.ac.uk/PROSPERO/display_record.asp?ID=CRD42015027338). The systematic review was undertaken in accordance with PRISMA guidelines[17].

### 2.1 Search strategy and selection criteria

A literature search was conducted in September 2017. Studies reporting the cost of medication nonadherence for any disease state were included. Searches were conducted in PubMed and Scopus. Neither publication date nor language restriction filters were used. The search used in PubMed was: (non-adherence[TIAB]) OR (“Patient Compliance”[MH] AND (“Drug Therapy”[MH]) OR medication[TIAB])) OR “Medication adherence”[MH] AND (costs[TIAB] OR “Costs and Cost Analysis”[MH] OR burden[TIAB]). This was adapted for other databases (eTable 1). Duplicate records were removed.

To identify relevant articles, an initial title and abstract screening was conducted by the lead reviewer (RC) to identify studies appropriate to the study question. This process was over-inclusive. In the second phase appraisal, potentially relevant full text papers were read and excluded based on the following criteria: i) papers not reporting the cost of medication nonadherence as a monetary value, ii) systematic reviews, iii) papers not reporting a baseline cost of medication nonadherence prior to the provision of an intervention and iv) papers not reporting original data. Any uncertainty was discussed amongst two adherence experts (RC and VGC) and resolved via consensus.

### 2.2 Extracted information

A data extraction form was developed based on the Cochrane Handbook for systematic reviews[18] and piloted on a sample of included studies. The extracted information included the source (study identification, citation and title), eligibility (confirmation of inclusion criteria), objective, methods (study design, study groups, year data extracted, follow up period, comparison, adherence measure, adherence data source and adherence definition), population (sample size, setting, country, disease state/drug studied, inclusion/exclusion criteria and perspective), impact/outcome indicators (indicators measured, indicator data source, indicator definitions and characteristics of the method of assessment), results (costs reported, standardized costs, type of costs, non-cost findings, sub-

1  
2  
3 group analysis and statistical significance), conclusions and miscellaneous (funding source,  
4 references to other relevant studies, limitations and reviewers comments).  
5  
6

7 Costs were defined as any indicator associated with medication nonadherence that was quantified  
8 with a monetary value in the original study. This included direct costs (those costs borne by the  
9 healthcare system, community and patients' families in addressing the illness), indirect costs (mainly  
10 productivity losses to society caused by the health problem or disease) and avoidable costs (those  
11 costs incurred for patients suffering complications, resulting from suboptimal medicines use, and  
12 patients with the same disease who experienced no complications). The indicators were grouped for  
13 analysis based on the original studies classification of the cost. All costs were converted to US  
14 dollars (2015 values) using the Cochrane Economics Methods Group - Evidence for Policy and  
15 Practice Information and Coordinating -Centre Cost Converter tool [19], allowing meaningful  
16 comparisons between nonadherence cost data. This online tool uses a two stage computation  
17 process to adjust estimates of costs for currency and/or price year utilizing a Gross Domestic Product  
18 deflator index and Purchasing Power Parities for Gross Domestic Product[19]. The PPP values given  
19 by the International Monetary Fund were chosen. If details of the original price year could not be  
20 ascertained from a study the mid-point year of the study period was used for calculations. The mean  
21 cost was calculated and reported where studies separated out costs for different confounding  
22 factors within the one outcome measure in a disease state. Annual costs were extrapolated from the  
23 original study data if results were not presented in this manner.  
24  
25  
26  
27  
28  
29  
30  
31  
32  
33  
34

35 The definition of medication nonadherence was derived from the included studies; with  
36 nonadherence referring to differing degrees of adherence based on the studies metric of estimation.  
37 Multiple nonadherence costs from individual studies may have been included where further sub-  
38 classification of nonadherence levels was defined. The analysis assessed nonadherence costs within  
39 disease groups, with disease group and cost classification derived from the study. Total healthcare  
40 costs included direct costs to the healthcare system while total costs incorporated direct and indirect  
41 costs.  
42  
43  
44  
45  
46  
47  
48  
49

### 50 **2.3 Quality criteria and economic evaluation classification**

51

52 Economic evaluation requires a comparison of two or more alternative courses of action, while  
53 considering both the inputs and outputs associated with each [20]. All studies were classified in  
54 accordance with Drummond's distinguishing characteristics of healthcare evaluations as either  
55 partial evaluations (outcome description, cost description, cost-outcome description, efficacy or  
56  
57  
58  
59  
60

1  
2  
3 effectiveness evaluation, cost analysis) or full economic evaluations (cost benefit analysis, cost utility  
4 analysis, cost effectiveness analysis, cost minimization analysis) by team consensus (RC and VGC).  
5  
6

7 The Drummond checklist [21] for economic evaluation was used to assess the quality of studies. The  
8 original checklist was modified to remove inapplicable items (4, 5, 12, 14, 15, 30 and 31) as no full  
9 economic evaluation met all inclusion criteria. A score of 1 was assigned if the study included the  
10 required item and zero if it did not with a maximum potential score of 28. The study was classified as  
11 high quality if at least 75% of Drummond's criteria were satisfied, medium quality if 51-74% were  
12 satisfied and low quality if 50% of the criteria or less were satisfied.  
13  
14  
15  
16  
17  
18  
19

## 20 **2.4 Meta-Analysis**

21  
22 Outcome/indicator costs were independently extracted utilizing predesigned data extraction forms  
23 (total healthcare costs, total costs, inpatient costs, outpatient costs, pharmacy costs, medical costs,  
24 emergency department costs, and hospitalisation costs) for the purpose of integrating the findings  
25 on the cost of medication nonadherence to pool data and increase the power of analysis.  
26  
27  
28  
29  
30  
31  
32  
33  
34  
35  
36  
37  
38  
39  
40  
41  
42  
43  
44  
45  
46  
47  
48  
49  
50  
51  
52  
53  
54  
55  
56  
57  
58  
59  
60

### 3 Results

#### 3.1 Study Selection

Search strategies retrieved 2768 potential articles after duplicates were removed. Two hundred and eighty nine articles were selected for full text review. Seventy nine studies were included in the review (Figure 1). Numerous other papers do discuss nonadherence costs however addressed tangential issues or did not present primary relevant data. Many studies failed to report the monetary value of medication nonadherence associated with a range of cost estimate indicators.

#### 3.2 Characteristics of individual studies

Sixty-six studies (83%) were conducted in the United States[10 22-86], four in Europe[87-90], four in Asia[91-94], three in Canada[95-97], one in the United Kingdom[98] and one across multiple countries throughout Europe and the United Kingdom[99]. Publication years ranged from 1997 to 2017, no date restriction filters were utilized with the earliest eligible study published in 1997. Individual studies reported a large variety of costs, calculated by varying means. Forty-four studies (56%) reported unadjusted costs[22 26 27 30 32-36 38-43 46 48-50 52-56 58 63-68 72 75 81-83 86 88-90 92-94 99], 21 (26%) adjusted costs[10 23-25 29 31 44 51 57 59-61 71 73 76-78 84 85 87 91], 11 a combination of adjusted and unadjusted[28 37 45 47 62 69 70 74 79 80 97], two unadjusted and predicted[95 96] and one predicted costs[98]. The method of determining nonadherence ranged significantly between studies with majority of papers utilizing pharmacy and/or healthcare claims data (97%)[10 22-29 31-52 55 57 59-88 92-97]. Some studies utilized a combination of surveys or questionnaires, observational assessment, previous study data and disease state specific recommended guidelines. Medication possession ratio (MPR) was the most utilized method to calculate patient nonadherence with 51 studies (63%) reporting nonadherence based on this measure[24 25 28 29 32-36 40-44 46 47 49-51 55 57 58 60-64 67-78 81 82 86-88 92-97]; however, the cut-off points to define medication nonadherence differed with some studies classifying nonadherence as less than 80% medication possession and others through sub-classification of percentage ranges (e.g., 0-20%, 20-40%, 40-60%, 60-80%, 80-100%). The proportion of days covered (PDC) was the next most common measure of nonadherence (11%)[31 37 45 48 52 79 80 83-85], with all other studies utilizing an array of measures including self-report[98], urine testing[56], observational assessment[99], time to discontinuation[59], cumulative possession ratio[23], disease specific medication management guidelines[66 89], Morisky 4-Item scale[53], medication gaps[38],

1  
2  
3 prescription refill rates[22 27] and medication supplies[10]. The main characteristics of the included  
4 studies are summarized in eTable 2.  
5  
6  
7

### 8 9 **3.3 Quality assessment and classification of economic evaluations**

10  
11 The quality assessment of economic evaluations yielded 10 studies of high[33 37 40 50 51 57 71 75  
12 87 93], 59 of medium[10 22-26 28-32 34-36 38 39 41-48 53-56 58 59 61-64 66 67 69 70 72 73 76-82  
13 84-86 88 89 91 94-99] and ten of low quality[27 49 60 65 68 74 83 90 92]. Scores ranged from 26.1%  
14 to 87.5% (mean 62.63%). Only one study identified the form of economic evaluation used and  
15 justified it in relation to the questions that were being addressed [71]. The item 'the choice of  
16 discount rate is stated and justified' was applicable only to studies covering a time period of more  
17 than one year; all studies that cover more than one year failed to identify or explain why costs had  
18 not been discounted. Details of the analysis and interpretation of results were lacking in the majority  
19 of studies resulting in medium or low quality scores.  
20  
21  
22  
23  
24  
25

26  
27 Through utilization of Drummond's distinguishing characteristics of healthcare evaluations  
28 criteria[20] it is apparent that no full economic evaluation was conducted in any of the included  
29 studies. All studies performed partial economic evaluations of varying extents. The classification of  
30 economic evaluations resulted in 59 cost description studies (74% of those included), 15 cost  
31 outcome descriptions and five cost analysis studies (eTable 2).  
32  
33  
34  
35  
36  
37

### 38 **3.4 Medication nonadherence and costs**

39  
40 The cost analysis of studies (figure 2 and figure 3) reported annual medication nonadherence costs  
41 incurred by the patient per year. The adjusted total cost of nonadherence across all disease groups  
42 ranged from \$949 to \$52,341, while the unadjusted total cost ranged from \$669 to \$162,699. Figure  
43 2 and figure 3 highlight the minimum, maximum and interquartile range of annual costs incurred by  
44 patients across disease groups where three or more studies were included for review. All cause costs  
45 encompass nonadherence costs incurred in mixed disease state studies, taking into account other  
46 confounding factors such as comorbidities.  
47  
48  
49  
50  
51

52  
53 Many different indicators were used to estimate medication nonadherence costs with no clear  
54 definition of what was incorporated in each cost component. The composition of included costs to  
55 estimate total cost or total healthcare cost varied significantly between studies thus indicators were  
56 grouped for analysis based on the original studies classification of the cost. The main ones were total  
57  
58  
59  
60

1  
2  
3 cost or total healthcare cost (83%), pharmacy costs (70%), outpatient costs (50%), inpatient costs  
4 (46%), medical costs (29%), emergency department costs (27%), and hospitalization costs (18%)  
5 (eTable 2). Avoidable costs (e.g., unnecessary hospitalizations, physician office visits and healthcare  
6 resource utilization) were not well defined with majority of studies failing to quantify these costs.  
7  
8

9  
10 Lower levels of adherence across all measures (e.g., MPR, PDC) were generally associated with  
11 higher total costs. From those that reported total or total healthcare costs, 39 studies (49%)  
12 reported nonadherence costs to be greater than adherence costs[24 25 27 29 31 32 34 37-39 42 43  
13 47 49 50 55 56 58 61-65 70-78 84 86 87 96-99] and 11 studies (15%) reported nonadherence costs to  
14 be less than adherence costs[23 26 36 44 59 63 66 81 92 94 95]. Four reported fluctuating findings  
15 based on varying nonadherence cost subcategories[33 48 67 93] and two studies reported  
16 conflicting findings between adjusted and unadjusted costs [79 80]. Higher all cause total  
17 nonadherence costs and lower disease group specific nonadherence costs were reported in four  
18 studies[41 68 85 91], whereas Hansen et al[47] reported all cause total nonadherence costs to be  
19 lower (\$18540 vs. \$52302) but disease group specific nonadherence total costs to be higher (\$3,879  
20 vs. \$2,954).  
21  
22

23  
24 The association between nonadherence and cost was determined through use of a variety of scaling  
25 systems. The most utilized methods were MPR and PDC. These measures could then further be sub-  
26 categorized based on the percentage of adherence/nonadherence. The 80-100% category was  
27 classified as the most adherent group across both scales, with the most common definition of  
28 nonadherence being <80% MPR or PDC.  
29  
30  
31  
32  
33  
34  
35  
36  
37  
38  
39

### 40 **3.5 Cost of medication nonadherence via disease group**

41  
42 Cancer exhibited more than double the cost variation of all other disease groups (\$114,101).  
43 Osteoporosis (\$43,240 vs. \$42,734), diabetes mellitus (\$7,077 vs. \$6,808) and mental health  
44 (\$16,110 vs. \$23,408) cost variations were similar between adjusted and unadjusted costs while  
45 cardiovascular disease adjusted costs were more than double unadjusted costs (\$16,124 vs. \$6,943).  
46 Inpatient costs represented the greatest proportion of costs contributing to total costs and/or total  
47 healthcare costs for cardiovascular disease, diabetes mellitus, osteoporosis, mental health, epilepsy  
48 and parkinson's disease. HIV/AIDS, cancer and gastrointestinal disease groups highest proportion of  
49 costs were attributed to pharmacy costs while outpatient costs were greatest in musculoskeletal  
50 conditions. Direct costs had greater economic bearing than indirect costs across all disease groups.  
51 Cost comparisons across disease groups are summarized in eTable 3.  
52  
53  
54  
55  
56  
57  
58  
59  
60

### 3.5.1 Cardiovascular Disease

Twelve studies measured the economic impact of medication nonadherence in cardiovascular disease [10 24 31 61 62 65 67 76 81 93 95 96]. Six studies reported adjusted costs [10 24 31 61 62 76] with annual costs being extrapolated for two of these [31 61]. Total healthcare costs and/or total costs were assessed in all of the studies with the major indicators measured including pharmacy costs [10 31 61 62 76], medical costs [10 24 31 61 76] and outpatient costs [31 62]. The annual economic cost of nonadherence ranged from \$3,347 to \$19,472. Sokol et al [10] evaluated the economic impact of medication nonadherence across three cardiovascular conditions; hypertension, hypercholesterolemia and chronic heart failure. For all three cardiovascular conditions examined, pharmacy costs were higher for the 80-100% adherent group than for the less adherent groups. Total costs and medical costs were lower for the adherent groups of hypertension and hypercholesterolemia patients. However, for chronic heart failure patients, total costs and medical costs were lower for the 1-19% and 20-39% adherent groups than for the 80-100% adherent groups.

Unadjusted costs were measured in six studies with the annual total healthcare costs and/or total costs of nonadherence ranging from \$1,433 to \$8,377 [65 67 81 93 95 96]. Rizzo et al [65] reported cost findings through subgroup analysis of five conditions. For all conditions the total healthcare costs were higher for nonadherent groups compared with adherent. While Zhao et al [81], categorized participants into adherence subgroups; finding that total healthcare costs were lower for the nonadherent population. The remaining studies used five key indicators to determine the economic impact: inpatient costs [67 93], outpatient costs [67 93], pharmacy costs [67 95 96], medical costs [95 96] and hospitalization costs [95 96].

### 3.5.2 Mental Health

The analyses used to report the economic impact of medication nonadherence in mental health varied widely. Eleven of 14 studies provided a total nonadherence cost estimate in mental health [23 25 27 52 59 66 73 82 91 98 99], with annual cost data being extrapolated for four of these [27 66 82 99]. Six studies used adjusted costs, finding that the total annual cost of nonadherence per patient ranged from \$3,252 to \$19,363 [23 25 59 60 73 91]. Bagalman et al [25] focused primarily on the indirect costs associated with nonadherence – short-term disability, workers compensation and paid time off costs while Robertson et al [82] highlighted the association between medication nonadherence and incarceration, with findings indicating incarceration and arrest costs are higher for worsening degrees of nonadherence. All other studies addressed direct costs. The main indicators used to measure the direct economic impact of medication nonadherence were pharmacy



1  
2  
3 costs[23 39 52 59 60 66 73 99], inpatient costs[39 60 66 98 99], outpatient costs[23 39 59 66 99] and  
4 hospitalization costs[22 23 59 99].  
5  
6

7 The total unadjusted cost for medication nonadherence ranged from \$2,512 to \$25,920 as reported  
8 in four studies [52 66 82 99]. Becker et al[27] used a subgroup analysis to classify patients based on  
9 their adherence level. For every 25% decrement in the rate of adherence (75-100%, 50-74%, 25-49%,  
10 <25%), nonadherence total costs increased. The negligible adherence group (<25%) incurred annual  
11 costs that were \$3,018 more than those of the maximal adherence group (75-100%).  
12  
13

14  
15  
16 Knapp et al[98] outlined the predicted cost of nonadherence with reference to relative impact and  
17 other factors associated with resource use and costs in patients with schizophrenia. Total costs  
18 (\$116,434) were substantially higher than the other two indicators, which were inpatient costs  
19 (\$13,577) and external services costs (\$3,241).  
20  
21  
22

### 23 **3.5.3 Diabetes mellitus:**

24  
25  
26 Eleven studies reported a cost measurement of the impact of medication nonadherence with  
27 reference to the health system and the individual[40 45 47 51 74 76 83 84 92 94 97]. One study  
28 estimated that the total US cost attributable to nonadherence in diabetes was slightly over \$5  
29 billion[51]. Five studies reported the adjusted total healthcare costs and/or total costs with annual  
30 costs per patient ranging from \$2,741 to \$9,819 [47 51 74 76 84 97]. One study reported total costs  
31 in relation to subgroup analysis based on MPR level[74], and another reported total healthcare costs  
32 through subgroup analysis of commercially insured and Medicare supplemental patients[76]. Curtis  
33 et al[84] utilized a diabetic population to report all cause costs, with nonadherence costs being  
34 higher than adherence costs across all outcome indicators bar pharmacy costs.  
35  
36  
37  
38  
39

40  
41 A further four studies reported unadjusted cost findings[40 83 92 94] with an additional four studies  
42 reporting unadjusted costs in combination with adjusted values[45 47 74 97]. Unadjusted total  
43 healthcare costs and/or total costs ranged from \$1,142 to \$7,951. Extrapolated annual costs were  
44 determined for two studies based on cost data presented [40 94].  
45  
46  
47

48 The most prominent indicators used to determine costs were pharmacy costs[40 45 47 74 76 83 84  
49 97], outpatient costs[40 47 76 84 94 97], inpatient costs[47 76 97] and hospitalization costs[51 92  
50 94]. All studies assessed the direct costs associated with medication nonadherence. One study  
51 evaluated the relationship between nonadherence and short term disability costs in addition to  
52 assessing direct costs[45].  
53  
54  
55  
56  
57  
58  
59  
60

### 3.5.4 Osteoporosis:

The cost of medication nonadherence in relation to osteoporosis was predominately examined through analysis of the direct costs associated with nonadherence using total healthcare costs and/or total costs, inpatient costs, outpatient costs, pharmacy costs and emergency department costs. Two studies further assessed the economic impact of nonadherence through evaluation of fracture related costs [48 88]. Four out of 11 studies reported the adjusted cost of medication nonadherence in addition to reporting unadjusted costs [28 79 80 87]. Three studies further classified nonadherence through subgroup analysis, with Briesacher et al[28] using MPR 20% interval increases and the two studies conducted by Zhao et al[79 80] using PDC, with  $\geq 80\%$  classified as high adherence, 50-79% medium adherence and  $< 50\%$  low adherence. In the studies conducted by Zhao et al[79 80], total healthcare costs were highest for the medium adherence group (\$41,402 and \$44,190) followed by the highest adherence group (\$37,553 and \$43,863), and lowest for the low adherence group (\$34,019 and \$43,771). These annual costs were extrapolated from study data. In contrast, Briesacher et al[28] modelled the subgroup analyses against the lowest adherence group ( $< 20\%$  MPR), finding that costs decreased as adherence increased.

Overall, the unadjusted total healthcare costs and/or total costs of nonadherence ranged from \$669 to \$43,404. Studies that further classified patients based on subgroups had the wider cost ranges. In the three studies that reported the lowest level of nonadherence to be PDC  $< 50\%$ , the cost of this category ranged from \$16,938 to \$43,404 [48 79 80].

One study examined only the medical costs of nonadherence through MPR subgroup analysis in commercial and Medicare supplemental populations. The findings were that, for all levels of nonadherence, costs of nonadherence were higher for Medicare supplemental patients [46].

### 3.5.5 Respiratory Disease:

The majority of studies reported unadjusted cost of medication nonadherence, with significant variation in the method of adherence classification[36 38 53 64 89]. Two studies used MPR[36 64], one the Morisky 4-Item scale[53], one the Global Initiative for Chronic Obstructive Lung Disease (GOLD) 2007 Guidelines[89] and one a 37 day gap in claims data[38]. Joshi et al[53] reported on the indirect costs of medication nonadherence through consideration of losses in total productivity costs, absenteeism costs and presenteeism costs, while all remaining studies examined direct costs. Delea et al[36] reported a direct relationship between decreases in medication nonadherence level and total costs, whereas Quittner et al[64] reported an inverse relationship between decreases in medication nonadherence level and total healthcare cost. The total expenses associated with the

1  
2  
3 lowest subgroup of adherence across all measures ranged from \$804 to \$36,259. Contrastingly Davis  
4 et al[85] utilized adjusted costs across four sub classifications of PDC adherence ranges to  
5 demonstrate that nonadherence costs were lower than adherence costs in all costing outcomes  
6 reported except hospitalization costs .  
7  
8

### 9 10 **3.5.6 Gastrointestinal Disease:**

11  
12 Three of five studies reported the adjusted annual cost of medication nonadherence per patient  
13 utilizing the MPR method [44 57 71]. Of these, two reported the total cost (\$12,085 and \$37,151)[44  
14 71] with the main contributors to the overall total cost being inpatient costs (22% and 37%),  
15 outpatient costs (57% and 17%) and pharmacy costs (20% and 45%).  
16  
17

18  
19 The remaining two studies utilized infusion rates to assess nonadherence with neither reporting the  
20 total cost nor total healthcare costs[30 54]. Carter et al[30] reported hospitalization costs to be  
21 \$42,854 while Kane et al[54] reported a significantly lower cost at \$5,566 in addition to other direct  
22 cost contributors.  
23  
24

### 25 26 27 **3.5.7 Epilepsy:**

28  
29 Three studies reported the economic impact of medication nonadherence in epilepsy. All reported  
30 unadjusted costs using an MPR cut off of <80%[35 42 43]. The main economic indicators used to  
31 assess total costs were inpatient costs (\$2,289 to \$6,874), emergency department visit costs (\$331  
32 to \$669) and pharmacy costs (\$442 to \$1,067). Davis et al[35] modelled the costs of the  
33 nonadherent group against the adherent group. The annual costs reported by Faught et al[43] were  
34 extrapolated from original cost data. The total cost of nonadherence in epilepsy ranged from \$1,866  
35 to \$22,673.  
36  
37  
38  
39  
40  
41

### 42 43 **3.5.8 HIV/AIDS:**

44  
45 The economic impact of medication nonadherence for HIV and AIDS patients reported amongst all  
46 three studies was similar [26 32 63]. Two of the three studies examined the costs only for HIV[26  
47 32], while Pruitt et al[63] assessed the cost in AIDS as well as HIV. The total unadjusted costs for  
48 nonadherent HIV patients ranged from \$16,957 to \$30,068 with one study further categorizing  
49 patients with HIV as having either a high viral load or low viral load[26]. The total cost of  
50 nonadherence in AIDS was \$30,523[63]. All studies used comparable indicators (total cost, inpatient  
51 cost, outpatient cost, pharmacy cost) to determine the cost of nonadherence.  
52  
53  
54  
55  
56  
57  
58  
59  
60

### 3.5.9 Parkinson's Disease:

The direct costs associated with Parkinson's disease were assessed in all three studies. The unadjusted total cost ranged from \$10,988 to \$52,023 [34 37 72]. Wei et al[72] further sub-grouped patients into MPR adherence percentage categories, and found that costs increased in all economic indicators (inpatient costs and outpatient costs) as adherence decreased, except for pharmacy costs which decreased with nonadherence. One study additionally reported the adjusted cost, estimating that \$10,290 could be attributed to medication nonadherence annually[37].

### 3.5.10 Musculoskeletal Conditions:

Differing subgroup analyses was used to measure the impact of medication nonadherence on the annual cost incurred by patients. One study assessed both the direct and indirect costs of nonadherence[50], one assessed only the medical costs[69] and one examined the direct costs in commercial and Medicare supplemental patient populations[78]. Zhao et al[78] reported the adjusted annual cost in the commercial population to be \$22,609, and in the Medicare supplemental group, \$28,126. Ivanova et al[50] reported only unadjusted costs and the annual total cost of \$3,408. This figure was extrapolated from study data provided. The main indicators used to evaluate the economic impact of nonadherence were inpatient costs, outpatient costs, pharmacy costs and medical costs. Outpatient costs made the largest contribution to the overall total.

### 3.5.11 Cancer:

Two studies evaluated the effects of medication nonadherence in cancer[33 75]. One study reported total annual costs of \$119,416[75], while the other gave a subgroup analysis based on classified adherence levels[33]. In general the lowest two adherence subgroups (<50% and 50-90%) reported the highest total healthcare costs (\$162,699 and \$67,838). This trend followed for inpatient costs, outpatient costs and other costs, but the reverse relationship was found for pharmacy costs.

### 3.5.12 Addiction:

The adjusted annual total healthcare cost of medication nonadherence was reported as \$53,504[56] while the unadjusted cost ranged from \$16,996 to \$52,213 [56 70 86]. Leider et al[56] reported the main contributors to this cost to be outpatient costs (\$10,829) and pharmacy costs (\$8,855), whereas Tkacz et al[70] and Ruetsch et al[86] reported them to be inpatient costs (\$28,407 and \$5,808) and outpatient costs (\$15,460 and \$5,743).

### 3.5.13 Metabolic conditions other than diabetes mellitus:

One study measured the influence of medication nonadherence on direct healthcare costs in metabolic conditions, reporting an unadjusted attributable total cost of \$138,525[55]. The economic indicators used to derive this cost were inpatient costs (\$16,192), outpatient costs (\$111,100), emergency department visit costs (\$801) and pharmacy costs (\$3,538).

### 3.5.14 Blood conditions:

Candrilli et al[29] reported cost findings on the relationship between nonadherence and healthcare costs, giving an adjusted total cost estimate of \$13,458 for nonadherence classified as MPR <80%.

### 3.5.15 All causes:

In addition to disease-specific studies of the economic impact of medication nonadherence, 28 studies reported the all-causes costs, encompassing cost drivers such as comorbidities. In seven of these studies, annual costs were extrapolated from the original data[47 50 61 64 66 85 99]. Eleven studies reported on economic indicators without giving total cost or total healthcare cost[22 45 46 54 55 57 60 81 83 90 99], and one study reported on costs per episode of nonadherence[90] .

The adjusted cost of medication nonadherence was reported in 14 studies with an estimated range of \$5,271 to \$52,341 [10 29 31 57 59-61 71 76 77 84 85 87 91]. Sokol et al[10] reported the all-cause cost of nonadherence through subgroup analysis of disease states and MPR levels, while Pittman et al[61] reported only using MPR level breakdown.

Fifteen studies reported the unadjusted economic impact of medication nonadherence with an estimated range of \$1,037 to \$53,793 [22 41 46 50 54 55 58 64-66 68 81 83 90 99]. A further four studies reported adjusted and unadjusted costs[37 45 47 97]. The most frequent indicators used to measure the economic impact were total healthcare costs and/or total costs (71%), pharmacy costs (75%), inpatient costs (46%), outpatient costs (46%), medical costs (28%) and emergency department visit costs (25%).

## 3.6 Meta-Analysis

Statistical analysis was attempted to collate the large collection of results from individual studies for the purpose of integrating the findings on the cost of medication nonadherence. However, the criterion for a meta-analysis could not be met due to the heterogeneity in study design and lack of

1  
2  
3 required statistical parameters in particular standard deviation[100]. Combining studies that differ  
4 substantially in design and other factors would have yielded meaningless summary results.  
5  
6  
7  
8  
9  
10  
11  
12  
13  
14  
15  
16  
17  
18  
19  
20  
21  
22  
23  
24  
25  
26  
27  
28  
29  
30  
31  
32  
33  
34  
35  
36  
37  
38  
39  
40  
41  
42  
43  
44  
45  
46  
47  
48  
49  
50  
51  
52  
53  
54  
55  
56  
57  
58  
59  
60

For peer review only

#### 4 Discussion

This systemic review broadens the scope of knowledge associated with the economic impact of medication nonadherence across different disease groups while building upon previous reviews where greater focus was on targeting overall risk factors or conceptual issues associated with medication nonadherence. Medication nonadherence was generally associated with higher healthcare costs. A large variety of outcomes were used to measure the economic impact including total cost or total healthcare cost, pharmacy costs, inpatient costs, outpatient costs, emergency department costs, medical costs and hospitalization costs.

The costs reported reflect the annual economic impact to the health system per patient. None of the studies estimated broader economic implications such as avoidable costs arising from higher disease prevalence with studies failing to quantify avoidable costs separately to direct and indirect costs possibly due to coding restraints in healthcare claims databases. The majority of studies took the patient or healthcare provider perspective, estimating additional costs associated with nonadherence when compared with adherence. Current literature identifies and quantifies key disease groups that contribute to the economic burden of nonadherence, but no research has attempted to synthesize costs across disease states within major healthcare systems. Comparisons across disease groups would benefit the development of health planning and policy yet prove problematic to interpret due to the varying scope of their inclusion (e.g., mental health vs. parkinsons disease). Similarly there is substantial variation in the differential cost of adherence amongst disease groups with certain diseases requiring greater cost inputs (e.g., cancer and supportive care costs). Further exploration of nonadherence behavior and associated costs is required to adequately quantify the overall cost of nonadherence to healthcare systems as the available data are subject to considerable uncertainty. Given the complexity of medication nonadherence in terms of varying study designs, methods of estimation and adherence definitions there is a limitation as to the ability to truly estimate costs attributed to nonadherence until further streamlined processes are defined.

Significant differences existed in the range of costs reported within and amongst disease groups. No consistent approach to the estimation of costs or levels of adherence has been established. Many different cost indicators were used, with few studies defining exactly what that cost category incorporated, so it is not surprising that cost estimates spanned wide ranges. Prioritization of healthcare interventions to address medication nonadherence is required to address the varying economic impact across disease groups. Determining the range of costs associated with medication nonadherence facilitates the extrapolation of annual national cost estimates attributable to

1  
2  
3 medication nonadherence thus enabling greater planning in terms of health policy to help  
4 counteract increasing avoidable costs.  
5  
6

7 The economic, clinical and humanistic consequences of medication nonadherence will continue to  
8 grow as the burden of chronic diseases grows worldwide. Evolution of health systems must occur to  
9 adequately address the determinants of adherence through utilization of effective health  
10 interventions. Haynes et al [101] highlights that “increasing the effectiveness of adherence  
11 interventions may have a far greater impact on the health of the population than any improvement  
12 in specific medical treatments”. Improving medication adherence provides an opportunity for major  
13 cost savings to healthcare systems. Predictions of population health outcomes through utilization of  
14 treatment efficacy data need to be used in conjunction with adherence rates to inform planning and  
15 project evaluation[4]. The correlation between increased nonadherence and higher disease  
16 prevalence should be used to inform policy makers to help circumvent avoidable costs to the  
17 healthcare system.  
18  
19  
20  
21  
22  
23  
24

25 The metric of adherence estimation varied substantially within and across disease groups; likely  
26 affecting the comparisons between studies. However, Hess et al [102], who compared six key  
27 adherence measures on the same study participants, found that the measures produced similar  
28 adherence values for all participants, although PDC and continuous measure of medication gaps  
29 produced slightly lower values. While this highlights the comparability of the measures of  
30 medication nonadherence, it further justifies the need to agree on consistent methods for  
31 estimating nonadherence through use of pharmacy claims data.  
32  
33  
34  
35  
36  
37

38 MPR was the most commonly used measure to estimate medication nonadherence. MPR was used  
39 in 63% of studies, followed by PDC, which was used in 11%. These percentages were consistent with  
40 those found recently by Sattler et al [103]. Even though the measures of medication nonadherence  
41 may be comparable, the definition of MPR and the cut-off points to define nonadherence differed  
42 significantly. Dragomir et al[95] defined MPR as the total days’ supply of medication dispensed in the  
43 period, divided by the follow up period, with the assumption of 100% adherence during  
44 hospitalization; Wu et al[76] removed the number of hospitalized days from the calculation; and  
45 Pittman et al[61] calculated the total number of days between the dates of the last filling of a  
46 prescription in the first six months in a given year and the first filling of a prescription in the 365 days  
47 before the last filling. Nonadherence could also be further classified into subcategories within MPR  
48 and PDC based on percentages. Thirty studies defined nonadherence as  $MPR < 80\%$ , and 12 studies  
49 categorized nonadherence into varying percentage subgroups. While Karve et al[104] validated the  
50 empirical basis for selecting 80% as a reasonable cut-off point based on predicting subsequent  
51  
52  
53  
54  
55  
56  
57  
58  
59  
60



1  
2  
3 hospitalizations in patients across a broad array of chronic diseases, 76 of the 79 studies included in  
4 this review examined more than just hospitalization costs as an indicator metric. Further research is  
5 required to identify and standardize nonadherence thresholds using other outcomes such as  
6 laboratory, productivity and pharmacy measures.  
7  
8

9  
10 Within the 79 studies covered, 35 different indicators were used to measure the cost of  
11 nonadherence and 19 reporting styles were identified. Because of the resultant heterogeneity, a  
12 meta-analysis was impossible. It is imperative that a standardized approach be established to  
13 measure and report the economic impact of medication nonadherence. The core outcome set must  
14 take into consideration the perspective of the intended audience and the proportion of  
15 nonadherence cost that is attributable to each outcome to determine an appropriate model[105].  
16 The critical indicators based on the findings of this review include total costs, pharmacy costs,  
17 inpatient costs, outpatient costs, emergency department visit costs, medical costs and  
18 hospitalization costs for analysis based on direct costs. For indirect analysis the core outcomes  
19 include short term disability costs, workers compensation costs, paid time off costs, absenteeism  
20 costs and productivity costs. We suggest that further analysis of the contribution of each outcome to  
21 the overall cost of nonadherence be undertaken to help develop a tool that can be utilized for future  
22 research.  
23  
24  
25  
26  
27  
28  
29  
30  
31

32 Many studies have examined the relationship between nonadherence and economic outcomes using  
33 a cross-sectional analysis[51]. The implications of this are that potentially crucial confounders such  
34 as baseline status are ignored. In addition, a cross-sectional analysis may obscure temporality: for  
35 example, did greater adherence result in reduced costs and improved health outcomes, or was the  
36 patient healthier initially and more capable of being adherent? A longitudinal design is needed to  
37 overcome this limitation.  
38  
39  
40  
41

42 Economic evaluations inform decisions on how to best make use of scarce societal health resources  
43 through offering an organized consideration of the range of possible alternative courses of action  
44 and the evidence of the likely effects of each[20]. While none of the studies taken separately could  
45 inform a choice between alternative courses of action, they did provide key evidence for decision  
46 makers about costs associated with medication nonadherence. Pharmacy claims data were utilized  
47 by the majority of studies to model cost estimates. Three-quarters of the studies were classified as  
48 cost descriptions, providing a cost or outcome overview of the health consequences associated with  
49 nonadherence. Ten studies garnered a high quality classification, potentially limiting the overall  
50 conclusions that are able to be drawn and emphasized the need for future study design to  
51 incorporate elements allowing full economic evaluations to be conducted. Hughes et al[106]  
52  
53  
54  
55  
56  
57  
58  
59  
60

1  
2  
3 highlighted the need for more information on the consequences of nonadherence, so that economic  
4 evaluations could reflect the potential long-term effect of this growing problem.  
5  
6

7 Of the seventy nine included studies, sixty six of the studies were conducted in the United States.  
8 Conversion of costs to a common currency (US dollars) facilitated the comparison of studies and  
9 disease groups. Comparison of costs between healthcare systems is difficult as no two are the same  
10 and as healthcare is generally more expensive in the United States cost estimates may not reflect  
11 average values. Thus caution needs to be taken when interpreting results however findings help to  
12 represent the significance of the economic burden medication nonadherence plays. Analysis of  
13 studies not conducted in the United States support the finding that generally medication  
14 nonadherence incurs greater costs for all cost indicator outcomes other than pharmacy costs.  
15  
16  
17  
18  
19

20 Due to the advances in technology available to record and assess medication nonadherence, the  
21 inclusion of studies undertaken in the late 1990s and early 2000s may have affected the  
22 comparability of results, despite the fact that these studies met the inclusion criteria[22 23 65 73 74  
23 98]. The quality of data presents a limitation. Information on disease groups with fewer included  
24 studies may be less reliable than information on those with more. However, our findings affirm the  
25 pattern of association between nonadherence and increasing healthcare costs.  
26  
27  
28  
29  
30  
31  
32  
33  
34  
35  
36  
37  
38  
39  
40  
41  
42  
43  
44  
45  
46  
47  
48  
49  
50  
51  
52  
53  
54  
55  
56  
57  
58  
59  
60

## 5 Conclusion

Medication nonadherence places a significant cost burden on healthcare systems. However differences in methodological strategies make the comparison amongst studies challenging and reduce the ability for the true economic magnitude of the problem to be expressed in a meaningful manner. Further research is required to develop a streamlined approach to classify patient adherence. An economic model that adequately depicts the current landscape of the nonadherence problem using key economic indicators could help to stratify costs and inform key policy and decision makers. Utilization of existing data could help to better define costs and provide valuable input into the development of an economic framework to standardize the economic impact of medication nonadherence.

## 6 Footnotes

**Contributors:** RC, VGC, SB, FFL and MF conceived the paper. RC and VGC performed all the data extraction and quality assessment. RC drafted the initial form and all revisions of this manuscript. All other authors (RC, VGC, SB, FFL, MF) made significant contributions to the manuscript and read and modified the drafts. All authors read and approved the final manuscript.

**Funding:** This research received no specific grant from any funding agency in the public, commercial or not-for-profit sectors.

**Competing interests:** None declared

**Data sharing statement:** All data from systematic review available in paper and supplementary material.

**Acknowledgement:** RC research is supported by an Australian Government Research Training Program Scholarship.

1. Centres for Disease Control and Prevention. Chronic Disease Prevention and Health Promotion. Available from: <http://www.cdc.gov/chronicdisease/overview> Accessed June 24, 2016
2. World Health Organisation, National Institute of Aging, National Institute of Health and US Department of Health and Human Services. Global Health and Ageing. Published October 2011. . Available from: [http://www.who.int/ageing/publications/global\\_health.pdf](http://www.who.int/ageing/publications/global_health.pdf) Accessed June 24, 2016
3. Congressional Budget Office . Offsetting effects of prescription drug use on medicare’s spending for medical services. Congressional Budget Office Report. Published November 2012. Available from: <http://www.cbo.gov/sites/default/files/cbofiles/attachments/43741-MedicalOffsets-11-29-12.pdf>. Accessed Aug 10, 2017
4. World Health Organisation. Adherence to Long Term Therapies; Evidence for Action. Published 2003. . Available from: [http://www.who.int/chp/knowledge/publications/adherence\\_full\\_report.pdf?ua=1](http://www.who.int/chp/knowledge/publications/adherence_full_report.pdf?ua=1). Accessed November 6, 2015.
5. Horne R WJ, Barber N, Elliot R, Morgan M. Concordance, adherence and compliance in medicine taking. Report for the National Coordinating Centre for NHS Service Delivery and Organization R & D (NCCSDO). 2005
6. New England Healthcare Institute. Thinking outside the pillbox: a system-wide approach to improving patient medication adherence for chronic disease. Published August 2009. . Available from: [http://www.nehi.net/publications/44/thinking\\_outside\\_the\\_pillbox\\_a\\_systemwide\\_approach\\_to\\_improving\\_patient\\_medication\\_adherence\\_for\\_chronic\\_disease](http://www.nehi.net/publications/44/thinking_outside_the_pillbox_a_systemwide_approach_to_improving_patient_medication_adherence_for_chronic_disease). Accessed June 24, 2016.
7. Pharmaceutical Group of the European Union. Targeting adherence. Improving patient outcomes in Europe through community pharmacists’ intervention. Published May 2008. Available from: <http://www.pgeu.eu/policy/5-adherence.html>. Accessed January 28, 2016. .
8. IMS Institute for Healthcare Informatics. Advancing the responsible use of medicines; applying levers for change. Published October 2012. Available from: <http://pharmanalyses.fr/wp-content/uploads/2012/10/Advancing-Responsible-Use-of-Meds-Report-01-10-12.pdf>. Accessed March 10, 2016. .
9. AIHW 2016. Health expenditure Australia 2014–15. Health and welfare expenditure series no. 57. Cat. no. HWE 67. Canberra: AIHW. .
10. Sokol MC, McGuigan KA, Verbrugge RR, et al. Impact of medication adherence on hospitalization risk and healthcare cost. *Medical care* 2005;**43**:521-30
11. Vermiere E, Avonts D, Van Royen P, et al. Context and health outcomes. *Lancet* (London, England) 2001;**357**(9273):2059-60
12. American Pharmacists Association/APhA AP . Medication Compliance–Adherence–Persistence (CAP) Digest. Washington DC. American Pharmacists Association and Pfizer Pharmaceuticals; 2003.
13. Egede LE, Gebregziabher M, Dismuke CE, et al. Medication nonadherence in diabetes: longitudinal effects on costs and potential cost savings from improvement. *Diabetes care* 2012;**35**(12):2533-9 doi: 10.2337/dc12-0572[published Online First: Epub Date] |.
14. Bach PB. New Math on Drug Cost-Effectiveness. *The New England journal of medicine* 2015;**373**(19):1797-9 doi: 10.1056/NEJMp1512750[published Online First: Epub Date] |.
15. Roebuck MC, Liberman JN, Gemmill-Toyama M, et al. Medication Adherence Leads To Lower Health Care Use And Costs Despite Increased Drug Spending. *Health affairs* 2011;**30**(1):91-99 doi: 10.1377/hlthaff.2009.1087[published Online First: Epub Date] |.
16. OECD. *Health at a Glance 2015*: OECD Publishing.
17. Moher D, Liberati A, Tetzlaff J, et al. Preferred reporting items for systematic reviews and meta-analyses: the PRISMA statement. *Annals of internal medicine* 2009;**151**(4):264-9, w64

18. Higgins JPT, Green S (editors). Cochrane Handbook for Systematic Reviews of Interventions Version 5.1.0 [updated March 2011]. The Cochrane Collaboration, 2011.
19. Shemilt I, Thomas J, Morciano M. A web-based tool for adjusting costs to a specific target currency and price year. *Evidence & Policy: A Journal of Research, Debate and Practice* 2010;**6**(1):51-59
20. Drummond MF, Sculpher MJ, Claxton K, et al. *Methods for the economic evaluation of health care programmes*: Oxford university press, 2015.
21. Drummond MF, Jefferson TO. Guidelines for authors and peer reviewers of economic submissions to the BMJ. The BMJ Economic Evaluation Working Party. *Bmj* 1996;**313**(7052):275-83
22. Svarstad BL, Shireman TI, Sweeney JK. Using drug claims data to assess the relationship of medication adherence with hospitalization and costs. *Psychiatric services (Washington, DC)* 2001;**52**:805-11
23. Gilmer TP, Dolder CR, Lacro JP, et al. Adherence to treatment with antipsychotic medication and health care costs among Medicaid beneficiaries with schizophrenia. *The American journal of psychiatry* 2004;**161**:692-9
24. Aubert RE, Yao J, Xia F, et al. Is there a relationship between early statin compliance and a reduction in healthcare utilization? *The American journal of managed care* 2010;**16**:459-66
25. Bagalman E, Yu-Isenberg KS, Durden E, et al. Indirect costs associated with nonadherence to treatment for bipolar disorder. *Journal of occupational and environmental medicine / American College of Occupational and Environmental Medicine* 2010;**52**:478-85 doi: 10.1097/JOM.0b013e3181db811d[published Online First: Epub Date]].
26. Barnett PG, Chow A, Joyce VR, et al. Determinants of the Cost of Health Services Used by Veterans With HIV. *Medical care* 2011;**49**:848-56 doi: 10.1097/MLR.0b013e31821b34c0[published Online First: Epub Date]].
27. Becker MA, Young MS, Ochshorn E, et al. The relationship of antipsychotic medication class and adherence with treatment outcomes and costs for Florida Medicaid beneficiaries with schizophrenia. *Administration and policy in mental health* 2007;**34**:307-14 doi: 10.1007/s10488-006-0108-5[published Online First: Epub Date]].
28. Briesacher BA, Andrade SE, Yood RA, et al. Consequences of poor compliance with bisphosphonates. *Bone* 2007;**41**:882-7 doi: 10.1016/j.bone.2007.07.009[published Online First: Epub Date]].
29. Candrilli SD, O'Brien SH, Ware RE, et al. Hydroxyurea adherence and associated outcomes among Medicaid enrollees with sickle cell disease. *American journal of hematology* 2011;**86**:273-7 doi: 10.1002/ajh.21968[published Online First: Epub Date]].
30. Carter CT, Waters HC, Smith DB. Impact of infliximab adherence on Crohn's disease-related healthcare utilization and inpatient costs. *Advances in therapy* 2011;**28**:671-83 doi: 10.1007/s12325-011-0048-7[published Online First: Epub Date]].
31. Casciano JP, Dotiwala ZJ, Martin BC, et al. The costs of warfarin underuse and nonadherence in patients with atrial fibrillation: a commercial insurer perspective. *Journal of managed care pharmacy : JMCP* 2013;**19**:302-16
32. Cooke CE, Lee HY, Xing S. Adherence to antiretroviral therapy in managed care members in the United States: a retrospective claims analysis. *Journal of managed care pharmacy : JMCP* 2014;**20**:86-92
33. Darkow T, Henk HJ, Thomas SK, et al. Treatment interruptions and non-adherence with imatinib and associated healthcare costs: a retrospective analysis among managed care patients with chronic myelogenous leukaemia. *PharmacoEconomics* 2007;**25**:481-96
34. Davis KL, Edin HM, Allen JK. Prevalence and cost of medication nonadherence in Parkinson's disease: evidence from administrative claims data. *Movement disorders : official journal of the Movement Disorder Society* 2010;**25**(4):474-80 doi: 10.1002/mds.22999[published Online First: Epub Date]].

- 1  
2  
3 35. Davis KLC, S. D.; Edin, H. M. Prevalence and cost of nonadherence with antiepileptic drugs in an  
4 adult managed care population. *Epilepsia* 2008;**49**(3):446-54 doi: 10.1111/j.1528-  
5 1167.2007.01414.x[published Online First: Epub Date]] .  
6  
7 36. Delea TE, Stanford RH, Hagiwara M, et al. Association between adherence with fixed dose  
8 combination fluticasone propionate/salmeterol on asthma outcomes and costs\*. *Current*  
9 *medical research and opinion* 2008;**24**:3435-42 doi: 10.1185/03007990802557344[published  
10 Online First: Epub Date]] .  
11 37. Delea TE, Thomas SK, Hagiwara M. The association between adherence to  
12 levodopa/carbidopa/entacapone therapy and healthcare utilization and costs among  
13 patients with Parkinson's disease: a retrospective claims-based analysis. *CNS drugs*  
14 2011;**25**:53-66 doi: 10.2165/11538970-000000000-00000[published Online First: Epub  
15 Date]] .  
16 38. Diehl JL, Daw JR, Coley KC, et al. Medical utilization associated with palivizumab compliance in a  
17 commercial and managed medicaid health plan. *Journal of managed care pharmacy : JMCP*  
18 2010;**16**:23-31  
19 39. Eaddy M, Grogg A, Locklear J. Assessment of compliance with antipsychotic treatment and  
20 resource utilization in a Medicaid population. *Clinical therapeutics* 2005;**27**:263-72 doi:  
21 10.1016/j.clinthera.2005.02.003[published Online First: Epub Date]] .  
22 40. Egede LE, Gebregziabher M, Dismuke CE, et al. Medication Nonadherence in Diabetes:  
23 Longitudinal effects on costs and potential cost savings from improvement. *Diabetes care*  
24 2012;**35**:2533-39 doi: 10.2337/dc12-0572[published Online First: Epub Date]] .  
25 41. Eisenberg DF, Placzek H, Gu T, et al. Cost and consequences of noncompliance to oral  
26 bisphosphonate treatment. *Journal of managed care & specialty pharmacy* 2015;**21**(1):56-65  
27 doi: 10.18553/jmcp.2015.21.1.56[published Online First: Epub Date]] .  
28 42. Ettinger AB, Manjunath R, Candrilli SD, et al. Prevalence and cost of nonadherence to  
29 antiepileptic drugs in elderly patients with epilepsy. *Epilepsy & behavior : E&B* 2009;**14**:324-  
30 9 doi: 10.1016/j.yebeh.2008.10.021[published Online First: Epub Date]] .  
31 43. Faight RE, Weiner JR, Guérin A, et al. Impact of nonadherence to antiepileptic drugs on health  
32 care utilization and costs: findings from the RANSOM study. *Epilepsia* 2009;**50**:501-9 doi:  
33 10.1111/j.1528-1167.2008.01794.x[published Online First: Epub Date]] .  
34 44. Gosselin A, Luo R, Lohoues H, et al. The impact of proton pump inhibitor compliance on health-  
35 care resource utilization and costs in patients with gastroesophageal reflux disease. *Value in*  
36 *health : the journal of the International Society for Pharmacoeconomics and Outcomes*  
37 *Research* 2009;**12**:34-9 doi: 10.1111/j.1524-4733.2008.00399.x[published Online First: Epub  
38 Date]] .  
39 45. Hagen SE, Wright DW, Finch R, et al. Impact of compliance to oral hypoglycemic agents on short-  
40 term disability costs in an employer population. *Population health management* 2014;**17**:35-  
41 41 doi: 10.1089/pop.2013.0009[published Online First: Epub Date]] .  
42 46. Halpern R, Becker L, Iqbal SU, et al. The association of adherence to osteoporosis therapies with  
43 fracture, all-cause medical costs, and all-cause hospitalizations: a retrospective claims  
44 analysis of female health plan enrollees with osteoporosis. *Journal of managed care*  
45 *pharmacy : JMCP* 2011;**17**:25-39  
46 47. Hansen RA, Farley JF, Droege M, et al. A retrospective cohort study of economic outcomes and  
47 adherence to monotherapy with metformin, pioglitazone, or a sulfonylurea among patients  
48 with type 2 diabetes mellitus in the United States from 2003 to 2005. *Clinical therapeutics*  
49 2010;**32**:1308-19 doi: 10.1016/j.clinthera.2010.07.011[published Online First: Epub Date]] .  
50 48. Hazel-Fernandez L, Louder AM, Foster SA, et al. Association of teriparatide adherence and  
51 persistence with clinical and economic outcomes in Medicare Part D recipients: a  
52 retrospective cohort study. *BMC musculoskeletal disorders* 2013;**14**:4 doi: 10.1186/1471-  
53 2474-14-4[published Online First: Epub Date]] .  
54  
55  
56  
57  
58  
59  
60

- 1  
2  
3 49. Huybrechts KF, Ishak KJ, Caro JJ. Assessment of compliance with osteoporosis treatment and its  
4 consequences in a managed care population. *Bone* 2006;**38**:922-8 doi:  
5 10.1016/j.bone.2005.10.022[published Online First: Epub Date]].  
6  
7 50. Ivanova JI, Bergman RE, Birnbaum HG, et al. Impact of medication adherence to disease-  
8 modifying drugs on severe relapse, and direct and indirect costs among employees with  
9 multiple sclerosis in the US. *Journal of medical economics* 2012;**15**:601-9 doi:  
10 10.3111/13696998.2012.667027[published Online First: Epub Date]].  
11  
12 51. Jha AK, Aubert RE, Yao J, et al. Greater adherence to diabetes drugs is linked to less hospital use  
13 and could save nearly \$5 billion annually. *Health affairs (Project Hope)* 2012;**31**:1836-46 doi:  
14 10.1377/hlthaff.2011.1198[published Online First: Epub Date]].  
15  
16 52. Jiang Y, Ni W. Estimating the Impact of Adherence to and Persistence with Atypical Antipsychotic  
17 Therapy on Health Care Costs and Risk of Hospitalization. *Pharmacotherapy* 2015;**35**(9):813-  
18 22 doi: 10.1002/phar.1634[published Online First: Epub Date]].  
19  
20 53. Joshi AV, Madhavan SS, Ambegaonkar A, et al. Association of medication adherence with  
21 workplace productivity and health-related quality of life in patients with asthma. *The Journal*  
22 *of asthma : official journal of the Association for the Care of Asthma* 2006;**43**:521-6 doi:  
23 10.1080/02770900600857010[published Online First: Epub Date]].  
24  
25 54. Kane SV, Chao J, Mulani PM. Adherence to infliximab maintenance therapy and health care  
26 utilization and costs by Crohn's disease patients. *Advances in therapy* 2009;**26**:936-46 doi:  
27 10.1007/s12325-009-0069-7[published Online First: Epub Date]].  
28  
29 55. Lee A, Song X, Khan I, et al. Association of cinacalcet adherence and costs in patients on dialysis.  
30 *Journal of medical economics* 2011;**14**:798-804 doi:  
31 10.3111/13696998.2011.627404[published Online First: Epub Date]].  
32  
33 56. Leider HL, Dhaliwal J, Davis EJ, et al. Healthcare costs and nonadherence among chronic opioid  
34 users. *The American journal of managed care* 2011;**17**:32-40  
35  
36 57. Mitra D, Hodgkins P, Yen L, et al. Association between oral 5-ASA adherence and health care  
37 utilization and costs among patients with active ulcerative colitis. *BMC gastroenterology*  
38 2012;**12**:132 doi: 10.1186/1471-230X-12-132[published Online First: Epub Date]].  
39  
40 58. Modi A, Siris ES, Tang J, et al. Cost and consequences of noncompliance with osteoporosis  
41 treatment among women initiating therapy. *Current medical research and opinion*  
42 2015;**31**(4):757-65 doi: 10.1185/03007995.2015.1016605[published Online First: Epub  
43 Date]].  
44  
45 59. Offord S, Lin J, Mirski D, et al. Impact of early nonadherence to oral antipsychotics on clinical and  
46 economic outcomes among patients with schizophrenia. *Advances in therapy* 2013;**30**:286-  
47 97 doi: 10.1007/s12325-013-0016-5[published Online First: Epub Date]].  
48  
49 60. Offord S, Lin J, Wong B, et al. Impact of oral antipsychotic medication adherence on healthcare  
50 resource utilization among schizophrenia patients with Medicare coverage. *Community*  
51 *mental health journal* 2013;**49**:625-9 doi: 10.1007/s10597-013-9638-y[published Online  
52 First: Epub Date]].  
53  
54 61. Pittman DG, Chen W, Bowlin SJ, et al. Adherence to statins, subsequent healthcare costs, and  
55 cardiovascular hospitalizations. *The American journal of cardiology* 2011;**107**:1662-6 doi:  
56 10.1016/j.amjcard.2011.01.052[published Online First: Epub Date]].  
57  
58 62. Pittman DG, Tao Z, Chen W, et al. Antihypertensive medication adherence and subsequent  
59 healthcare utilization and costs. *The American journal of managed care* 2010;**16**:568-76  
60  
63. Pruitt Z, Robst J, Langland-Orban B, et al. Healthcare costs associated with antiretroviral  
adherence among medicaid patients. *Applied health economics and health policy*  
2015;**13**:69-80 doi: 10.1007/s40258-014-0138-1[published Online First: Epub Date]].  
64. Quittner AL, Zhang J, Marynchenko M, et al. Pulmonary medication adherence and health-care  
use in cystic fibrosis. *Chest* 2014;**146**:142-51 doi: 10.1378/chest.13-1926[published Online  
First: Epub Date]].



- 1  
2  
3 65. Rizzo JAS, W. R. Variations in compliance among hypertensive patients by drug class: implications  
4 for health care costs. *Clinical therapeutics* 1997;**19**(6):1446-57; discussion 24-5  
5  
6 66. Robinson RL, Long SR, Chang S, et al. Higher costs and therapeutic factors associated with  
7 adherence to NCCA HEDIS antidepressant medication management measures: analysis of  
8 administrative claims. *Journal of managed care pharmacy : JMCP* 2006;**12**:43-54  
9  
10 67. Stroupe KT, Teal EY, Tu W, et al. Association of Refill Adherence and Health Care Use Among  
11 Adults with Hypertension in an Urban Health Care System. *Pharmacotherapy* 2006;**26**:779-  
12 89 doi: 10.1592/phco.26.6.779[published Online First: Epub Date]].  
13  
14 68. Sunycz JA, Mucha L, Baser O, et al. Impact of compliance and persistence with bisphosphonate  
15 therapy on health care costs and utilization. *Osteoporosis international : a journal*  
16 *established as result of cooperation between the European Foundation for Osteoporosis and*  
17 *the National Osteoporosis Foundation of the USA* 2008;**19**:1421-9 doi: 10.1007/s00198-008-  
18 0586-2[published Online First: Epub Date]].  
19  
20 69. Tan H, Cai Q, Agarwal S, et al. Impact of adherence to disease-modifying therapies on clinical and  
21 economic outcomes among patients with multiple sclerosis. *Advances in therapy*  
22 2011;**28**:51-61 doi: 10.1007/s12325-010-0093-7[published Online First: Epub Date]].  
23  
24 70. Tkacz J, Volpicelli J, Un H, et al. Relationship between buprenorphine adherence and health  
25 service utilization and costs among opioid dependent patients. *Journal of substance abuse*  
26 *treatment* 2014;**46**:456-62 doi: 10.1016/j.jsat.2013.10.014[published Online First: Epub  
27 Date]].  
28  
29 71. Wan GJ, Kozma CM, Slaton TL, et al. Inflammatory bowel disease: healthcare costs for patients  
30 who are adherent or non-adherent with infliximab therapy. *Journal of medical economics*  
31 2014;**17**:384-93 doi: 10.3111/13696998.2014.909436[published Online First: Epub Date]].  
32  
33 72. Wei Y-J, Palumbo FB, Simoni-Wastila L, et al. Antiparkinson drug adherence and its association  
34 with health care utilization and economic outcomes in a Medicare Part D population. *Value*  
35 *in health : the journal of the International Society for Pharmacoeconomics and Outcomes*  
36 *Research* 2014;**17**:196-204 doi: 10.1016/j.jval.2013.12.003[published Online First: Epub  
37 Date]].  
38  
39 73. White TJV, Ann; Ory, Caron; Dezii, Christopher M.; Chang, Eunice. Economic Impact of Patient  
40 Adherence with Antidepressant Therapy Within a Managed Care Organization. *Disease*  
41 *Management & Health Outcomes* 2003;**11**(12):817-22 doi: 10.2165/00115677-200311120-  
42 00006[published Online First: Epub Date]].  
43  
44 74. White TJV, Ann; Chang, Eunice; Dezii, Christopher M.; Abrams, Geoffrey D. The Costs of Non-  
45 Adherence to Oral Antihyperglycemic Medication in Individuals with Diabetes Mellitus and  
46 Concomitant Diabetes Mellitus and Cardiovascular Disease in a Managed Care Environment.  
47 *Disease Management & Health Outcomes* 2004;**12**(3):181-88 doi: 10.2165/00115677-  
48 200412030-00004[published Online First: Epub Date]].  
49  
50 75. Wu EQ, Johnson S, Beaulieu N, et al. Healthcare resource utilization and costs associated with  
51 non-adherence to imatinib treatment in chronic myeloid leukemia patients. *Current medical*  
52 *research and opinion* 2010;**26**:61-69 doi: 10.1185/03007990903396469[published Online  
53 First: Epub Date]].  
54  
55 76. Wu J, Seiber E, Lacombe VA, et al. Medical utilization and costs associated with statin adherence  
56 in Medicaid enrollees with type 2 diabetes. *The Annals of pharmacotherapy* 2011;**45**:342-9  
57 doi: 10.1345/aph.1P539[published Online First: Epub Date]].  
58  
59 77. Wu N, Chen S, Boulanger L, et al. Duloxetine compliance and its association with healthcare costs  
60 among patients with diabetic peripheral neuropathic pain. *Journal of medical economics*  
2009;**12**:192-202 doi: 10.3111/13696990903240559[published Online First: Epub Date]].  
78. Zhao Y, Chen S-Y, Wu N, et al. Medication Adherence and Healthcare Costs among Fibromyalgia  
Patients Treated with Duloxetine. *Pain Practice* 2011;**11**:381-91 doi: 10.1111/j.1533-  
2500.2010.00431.x[published Online First: Epub Date]].

- 1  
2  
3 79. Zhao Y, Johnston SS, Smith DM, et al. Association between teriparatide adherence and  
4 healthcare utilization and costs among hip fracture patients in the United States. *Bone*  
5 2014;**60**:221-6 doi: 10.1016/j.bone.2013.12.016[published Online First: Epub Date]].
- 6 80. Zhao Y, Johnston SS, Smith DM, et al. Association between teriparatide adherence and  
7 healthcare utilization and costs in real-world US kyphoplasty/vertebroplasty patients.  
8 *Osteoporosis International* 2013;**24**:2525-33 doi: 10.1007/s00198-013-2324-7[published  
9 Online First: Epub Date]].
- 10 81. Zhao Y, Zabriski S, Bertram C. Associations between statin adherence level, health care costs, and  
11 utilization. *Journal of managed care & specialty pharmacy* 2014;**20**:703-13
- 12 82. Robertson AG, Swanson JW, Van Dorn RA, et al. Treatment participation and medication  
13 adherence: effects on criminal justice costs of persons with mental illness. *Psychiatric*  
14 *services (Washington, DC)* 2014;**65**(10):1189-91 doi: 10.1176/appi.ps.201400247[published  
15 Online First: Epub Date]].
- 16 83. Buysman EK, Anderson A, Bacchus S, et al. Retrospective Study on the Impact of Adherence in  
17 Achieving Glycemic Goals in Type 2 Diabetes Mellitus Patients Receiving Canagliflozin. *Adv*  
18 *Ther* 2017;**34**(4):937-53 doi: 10.1007/s12325-017-0500-4[published Online First: Epub  
19 Date]].
- 20 84. Curtis SE, Boye KS, Lage MJ, et al. Medication adherence and improved outcomes among  
21 patients with type 2 diabetes. *The American journal of managed care* 2017;**23**(7):e208-e14
- 22 85. Davis JR, Wu B, Kern DM, et al. Impact of Nonadherence to Inhaled Corticosteroid/LABA Therapy  
23 on COPD Exacerbation Rates and Healthcare Costs in a Commercially Insured US Population.  
24 *American health & drug benefits* 2017;**10**(2):92-102
- 25 86. Ruetsch C, Tkacz J, Nadipelli VR, et al. Heterogeneity of nonadherent buprenorphine patients:  
26 subgroup characteristics and outcomes. *The American journal of managed care*  
27 2017;**23**(6):e172-e79
- 28 87. Kjellberg J, Jorgensen AD, Vestergaard P, et al. Cost and health care resource use associated with  
29 noncompliance with oral bisphosphonate therapy: an analysis using Danish health registries.  
30 *Osteoporosis International* 2016;**27**(12):3535-41 doi: 10.1007/s00198-016-3683-7[published  
31 Online First: Epub Date]].
- 32 88. Olsen KR, Hansen C, Abrahamsen B. Association between refill compliance to oral  
33 bisphosphonate treatment, incident fractures, and health care costs--an analysis using  
34 national health databases. *Osteoporosis international : a journal established as result of*  
35 *cooperation between the European Foundation for Osteoporosis and the National*  
36 *Osteoporosis Foundation of the USA* 2013;**24**:2639-47 doi: 10.1007/s00198-013-2365-  
37 y[published Online First: Epub Date]].
- 38 89. Miravittles M, Sicras A, Crespo C, et al. Costs of chronic obstructive pulmonary disease in relation  
39 to compliance with guidelines: a study in the primary care setting. *Therapeutic advances in*  
40 *respiratory disease* 2013;**7**:139-50 doi: 10.1177/1753465813484080[published Online First:  
41 Epub Date]].
- 42 90. Alvarez Payero M, Martinez Lopez de Castro N, Ucha Samartin M, et al. Medication non-  
43 adherence as a cause of hospital admissions. *Farmacia hospitalaria : organo oficial de*  
44 *expresion cientifica de la Sociedad Espanola de Farmacia Hospitalaria* 2014;**38**(4):328-33 doi:  
45 10.7399/fh.2014.38.4.7660[published Online First: Epub Date]].
- 46 91. Joe S, Lee JS. Association between non-compliance with psychiatric treatment and non-  
47 psychiatric service utilization and costs in patients with schizophrenia and related disorders.  
48 *BMC psychiatry* 2016;**16**(1):444 doi: 10.1186/s12888-016-1156-3[published Online First:  
49 Epub Date]].
- 50 92. Hong JS, Kang HC. Relationship between oral antihyperglycemic medication adherence and  
51 hospitalization, mortality, and healthcare costs in adult ambulatory care patients with type 2  
52 diabetes in South Korea. *Medical care* 2011;**49**:378-84 doi:  
53 10.1097/MLR.0b013e31820292d1[published Online First: Epub Date]].
- 54  
55  
56  
57  
58  
59  
60

- 1  
2  
3 93. Dilokthornsakul P, Chaiyakunapruk N, Nimpitakpong P, et al. The Effects of Medication Supply on  
4 Hospitalizations and Health-Care Costs in Patients with Chronic Heart Failure. *Value in Health*  
5 2012;**15**:S9-S14 doi: 10.1016/j.jval.2011.11.019[published Online First: Epub Date]].
- 6 94. An S-Y, Kim HJ, Chun KH, et al. Clinical and economic outcomes in medication-adherent and -  
7 nonadherent patients with type 2 diabetes mellitus in the Republic of Korea. *Clinical*  
8 *therapeutics* 2014;**36**:245-54 doi: 10.1016/j.clinthera.2013.12.012[published Online First:  
9 Epub Date]].
- 10 95. Dragomir A, Cote R, White M, et al. Relationship between adherence level to statins, clinical  
11 issues and health-care costs in real-life clinical setting. *Value in health : the journal of the*  
12 *International Society for Pharmacoeconomics and Outcomes Research* 2010;**13**(1):87-94 doi:  
13 10.1111/j.1524-4733.2009.00583.x[published Online First: Epub Date]].
- 14 96. Dragomir A, Côté R, Roy L, et al. Impact of adherence to antihypertensive agents on clinical  
15 outcomes and hospitalization costs. *Medical care* 2010;**48**:418-25 doi:  
16 10.1097/MLR.0b013e3181d567bd[published Online First: Epub Date]].
- 17 97. Gentil L, Vasiliadis HM, Preville M, et al. Adherence to Oral Antihyperglycemic Agents Among  
18 Older Adults With Mental Disorders and Its Effect on Health Care Costs, Quebec, Canada,  
19 2005-2008. *Preventing chronic disease* 2015;**12**:E230 doi: 10.5888/pcd12.150412[published  
20 Online First: Epub Date]].
- 21 98. Knapp M, King D, Pugner K, et al. Non-adherence to antipsychotic medication regimens:  
22 associations with resource use and costs. *The British journal of psychiatry : the journal of*  
23 *mental science* 2004;**184**:509-16
- 24 99. Hong J, Reed C, Novick D, et al. Clinical and economic consequences of medication non-  
25 adherence in the treatment of patients with a manic/mixed episode of bipolar disorder:  
26 results from the European Mania in Bipolar Longitudinal Evaluation of Medication (EMBLEM)  
27 study. *Psychiatry research* 2011;**190**:110-4 doi: 10.1016/j.psychres.2011.04.016[published  
28 Online First: Epub Date]].
- 29 100. Deeks JJ, Altman DG (editors). *Cochrane Handbook for Systematic Reviews of Interventions*  
30 *Version 5.1.0 [updated March 2011]. . The Cochrane Collaboration, 2011*
- 31 101. Haynes RB, McDonald H, Garg AX, et al. Interventions for helping patients to follow  
32 prescriptions for medications. *The Cochrane database of systematic reviews*  
33 2002(2):CD000011 doi: 10.1002/14651858.CD000011[published Online First: Epub Date]].
- 34 102. Hess LM, Raebel MA, Conner DA, et al. Measurement of adherence in pharmacy administrative  
35 databases: a proposal for standard definitions and preferred measures. *The Annals of*  
36 *pharmacotherapy* 2006;**40**(7-8):1280-88 doi: 10.1345/aph.1H018[published Online First:  
37 Epub Date]].
- 38 103. Sattler EL, Lee JS, Perri M, 3rd. Medication (re)fill adherence measures derived from pharmacy  
39 claims data in older Americans: a review of the literature. *Drugs & aging* 2013;**30**(6):383-99  
40 doi: 10.1007/s40266-013-0074-z[published Online First: Epub Date]].
- 41 104. Karve S, Cleves MA, Helm M, et al. An empirical basis for standardizing adherence measures  
42 derived from administrative claims data among diabetic patients. *Medical care*  
43 2008;**46**(11):1125-33 doi: 10.1097/MLR.0b013e31817924d2[published Online First: Epub  
44 Date]].
- 45 105. Gargon E, Williamson PR, Altman DG, et al. The COMET Initiative database: progress and  
46 activities from 2011 to 2013. *Trials* 2014;**15**:279 doi: 10.1186/1745-6215-15-279[published  
47 Online First: Epub Date]].
- 48 106. Hughes DA, Bagust A, Haycox A, et al. Accounting for noncompliance in pharmacoeconomic  
49 evaluations. *Pharmacoeconomics* 2001;**19**(12):1185-97
- 50  
51  
52  
53  
54  
55  
56  
57  
58  
59  
60

## Figure Legends

### Figure 1: PRISMA Flow Diagram

The PRISMA diagram details the search and selection process applied during the overview. The search yielded a total of 2768 citations. Studies were selected based on the inclusion criteria; studies reporting the cost of medication nonadherence using original cost data. Intervention studies were required to report baseline data. Seventy nine original studies met the inclusion criteria.

### Figure 2: Annual Adjusted Medication Nonadherence Costs per patient per year

Encompass the minimum, maximum and interquartile range of adjusted annual costs incurred by patients across disease groups where three or more studies were included for review. Gastrointestinal only included three studies limiting the range of costs. All cause costs encompass nonadherence costs incurred in mixed disease state studies, taking into account other confounding factors such as comorbidities.

### Figure 1: Annual Unadjusted Medication Nonadherence Costs per patient per year

Encompass the minimum, maximum and interquartile range of unadjusted annual costs incurred by patients across disease groups where three or more studies were included for review. Epilepsy and addiction only included three studies limiting the range of costs. All cause costs encompass nonadherence costs incurred in mixed disease state studies, taking into account other confounding factors such as comorbidities.

1  
2  
3  
4  
5  
6  
7  
8  
9  
10  
11  
12  
13  
14  
15  
16  
17  
18  
19  
20  
21  
22  
23  
24  
25  
26  
27  
28  
29  
30  
31  
32  
33  
34  
35  
36  
37  
38  
39  
40  
41  
42  
43  
44  
45  
46  
47  
48  
49  
50  
51  
52  
53  
54  
55  
56  
57  
58  
59  
60

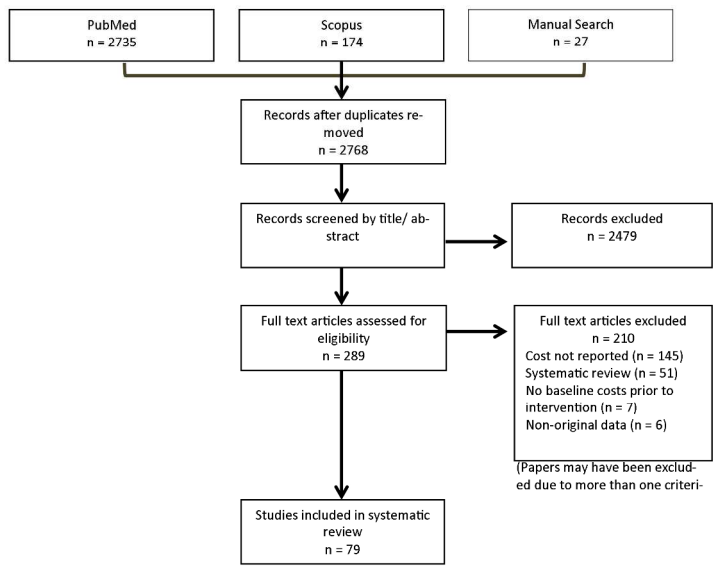

Figure 1: Flow diagram of references identified, retrieved and included in the systematic review

209x297mm (300 x 300 DPI)

1  
2  
3  
4  
5  
6  
7  
8  
9  
10  
11  
12  
13  
14  
15  
16  
17  
18  
19  
20  
21  
22  
23  
24  
25  
26  
27  
28  
29  
30  
31  
32  
33  
34  
35  
36  
37  
38  
39  
40  
41  
42  
43  
44  
45  
46  
47  
48  
49  
50  
51  
52  
53  
54  
55  
56  
57  
58  
59  
60

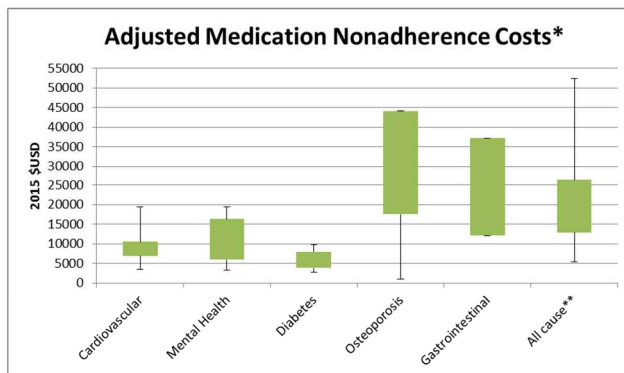

Figure 2: Annual Adjusted Medication Nonadherence Costs per patient per year  
 \*Disease groups with three or more studies were included. Gastrointestinal only included three studies limiting the range of costs.  
 \*\* All cause costs: mixed disease state studies

209x297mm (300 x 300 DPI)

1  
2  
3  
4  
5  
6  
7  
8  
9  
10  
11  
12  
13  
14  
15  
16  
17  
18  
19  
20  
21  
22  
23  
24  
25  
26  
27  
28  
29  
30  
31  
32  
33  
34  
35  
36  
37  
38  
39  
40  
41  
42  
43  
44  
45  
46  
47  
48  
49  
50  
51  
52  
53  
54  
55  
56  
57  
58  
59  
60

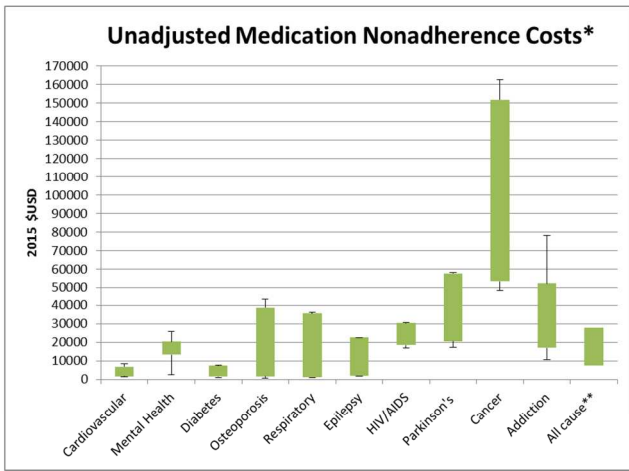

Figure 3: Annual Unadjusted Medication Nonadherence Costs per patient per year  
 \*Disease groups with three or more studies were included. Epilepsy and Addiction only included three studies limiting the range of costs.  
 \*\* All cause costs: mixed disease state studies

209x297mm (300 x 300 DPI)

**eTable 1 Search Strategy**

| Database | Search Strategy                                                                                                                                                                                    |
|----------|----------------------------------------------------------------------------------------------------------------------------------------------------------------------------------------------------|
| PubMed   | ((costs[TIAB] OR "Costs and Cost Analysis"[MH] OR burden[TIAB]) AND (nonadherence[TIAB] OR ("Patient Compliance"[MH] AND ("Drug Therapy"[MH] OR medication[TIAB])) OR "Medication adherence"[MH])) |
| Scopus   | ( TITLE-ABS-KEY ( medication AND compliance OR patient AND compliance ) ) AND ( TITLE-ABS-KEY ( statistical AND model ) ) AND ( TITLE-ABS-KEY ( health AND care AND cost ) )                       |



eTable 2: Studies identified with costs reported by adherence level and disease group

| Author, Year, Country                                | Objective                                                                                                                                                                             | Study Characteristics                                                                                                                                       | Adherence (as reported in paper)                                                                                                                     | Outcomes/ Indicators                                                                  | Results (USD, 2015)                                                                                                                                                                                                                                                   | Quality                                                           |
|------------------------------------------------------|---------------------------------------------------------------------------------------------------------------------------------------------------------------------------------------|-------------------------------------------------------------------------------------------------------------------------------------------------------------|------------------------------------------------------------------------------------------------------------------------------------------------------|---------------------------------------------------------------------------------------|-----------------------------------------------------------------------------------------------------------------------------------------------------------------------------------------------------------------------------------------------------------------------|-------------------------------------------------------------------|
| <b>Cardiovascular Disease</b>                        |                                                                                                                                                                                       |                                                                                                                                                             |                                                                                                                                                      |                                                                                       |                                                                                                                                                                                                                                                                       |                                                                   |
| <i>Aubert et al</i> [1]<br>2010<br>US                | To investigate whether compliance during the first 2 years of statin therapy is associated with reduced hospitalization rates and direct medical costs during year 3.                 | <u>Design:</u> Retrospective cohort study<br><u>Follow Up:</u> 3 years<br><u>Sample Size:</u> 10227 (A:3512, NA:6715)                                       | <u>Measure:</u> MPR<br><u>Classification:</u> MPR < 80 = non-compliant<br><u>Method of Assessment:</u> pharmacy claims data                          | Total Healthcare costs<br>Medical Costs                                               | <u>Type of Costs:</u> adjusted<br><u>Classification:</u> disease state specific<br><u>Currency Year:</u> USD, 2002<br><u>Cost of Nonadherence:</u> THC:\$5289.61 (\$6865.90), MC:\$4908.09 (\$6370.60)                                                                | <u>Quality:</u> medium<br><u>Classification:</u> cost description |
| <i>Casciano et al</i> [2]<br>2013<br>US              | To assess the economic burden of underuse and nonadherence of warfarin therapy among patients with non-valvular atrial fibrillation in a commercially insured population.             | <u>Design:</u> Retrospective, observational, quasi-experimental study<br><u>Follow Up:</u> 18months<br><u>Sample Size:</u> 13289 (A:2852, NA:4184, NE:6253) | <u>Measure:</u> PDC<br><u>Classification:</u> PDC <80 = low adherence, 0 = no warfarin exposure<br><u>Method of Assessment:</u> pharmacy claims data | Total Costs<br>Inpatient Costs<br>Outpatient Costs<br>Pharmacy Costs<br>Medical Costs | <u>Type of Costs:</u> adjusted<br><u>Classification:</u> all cause<br><u>Currency Year:</u> USD, 2005<br><u>Cost of Nonadherence*:</u> TC:\$16612.44(\$19936.70), IC:\$9382.56 (\$11260.10), OC:\$8605.92 (\$10328), PC:\$2388.24 (\$2866.20), MC:\$15235.80(\$18285) | <u>Quality:</u> medium<br><u>Classification:</u> cost description |
| <i>Dilokthornsakul et al</i> [3]<br>2012<br>Thailand | To determine the effects of medication supplies on healthcare costs and hospitalizations in patients with chronic heart failure receiving angiotensin converting enzyme inhibitors or | <u>Design:</u> Retrospective cohort study<br><u>Follow Up:</u> 1 year<br><u>Sample Size:</u> 393 (A:168, NA:219, OA:6)                                      | <u>Measure:</u> MPR<br><u>Classification:</u> MPR < 80 = undersupply, MPR >120 = oversupply<br><u>Method of Assessment:</u> pharmacy claims data     | Total Healthcare Costs<br>Inpatient Costs<br>Outpatient Costs                         | <u>Type of Costs:</u> unadjusted<br><u>Classification:</u> disease state specific<br><u>Currency Year:</u> USD, 2004<br><u>Cost of Nonadherence:</u> THC:\$1157 (\$1433.06), IC:\$1019 (\$1262.13), OC:\$138 (\$170.93)                                               | <u>Quality:</u> high<br><u>Classification:</u> cost description   |

|    |                           |                        |                              |                        |                 |                                                   |
|----|---------------------------|------------------------|------------------------------|------------------------|-----------------|---------------------------------------------------|
| 1  |                           |                        |                              |                        |                 |                                                   |
| 2  |                           |                        |                              |                        |                 |                                                   |
| 3  |                           |                        |                              |                        |                 |                                                   |
| 4  |                           | angiotensin receptor   |                              |                        |                 |                                                   |
| 5  |                           | blockers.              |                              |                        |                 |                                                   |
| 6  | <i>Dragomir et al</i> [4] | To evaluate the impact | <u>Design:</u> Retrospective | <u>Measure:</u> MPR    | Total           | <u>Type of Costs:</u> unadjusted and predicted    |
| 7  | 2010                      | of low adherence to    | cohort study                 | <u>Classification:</u> | Healthcare      | <u>Classification:</u> disease state specific and |
| 8  | Canada                    | antihypertensive       | <u>Follow Up:</u> 3 years    | MPR $\geq$ 80 =        | Costs           | hospitalized patients                             |
| 9  |                           | agents on              | <u>Sample Size:</u> 56896    | adherent, MPR <        | Pharmacy        | <u>Currency Year:</u> CAD, 2006                   |
| 10 |                           | cardiovascular         | (A:38217, NA:18679)          | 80 = nonadherent       | Costs           | <u>Cost of Nonadherence:</u> Unadjusted           |
| 11 |                           | outcomes and           |                              | <u>Method of</u>       | Medical Costs   | Disease state specific: THC:\$7165                |
| 12 |                           | hospitalization costs. |                              | <u>Assessment:</u>     | Hospitalization | (\$6900.87), PC: \$1800 (\$1733.64),              |
| 13 |                           |                        |                              | pharmacy claims        | Costs           | MC: \$1370 (\$1319.50), HC: \$3995                |
| 14 |                           |                        |                              | data                   |                 | (\$3847.73)                                       |
| 15 |                           |                        |                              |                        |                 | Unadjusted Hospitalized patients:                 |
| 16 |                           |                        |                              |                        |                 | THC: \$17397 (\$16755.67), PC:\$2685              |
| 17 |                           |                        |                              |                        |                 | (\$2586.02), MC:\$2608 (\$2511.86),               |
| 18 |                           |                        |                              |                        |                 | HC: \$12104 (\$11657.79)                          |
| 19 |                           |                        |                              |                        |                 | Predicted disease state specific:                 |
| 20 |                           |                        |                              |                        |                 | HC:\$3877 (\$3734.08)                             |
| 21 |                           |                        |                              |                        |                 | Predicted hospitalized patient:                   |
| 22 |                           |                        |                              |                        |                 | HC:\$11715 (\$11283.13)                           |
| 23 |                           |                        |                              |                        |                 |                                                   |
| 24 |                           |                        |                              |                        |                 |                                                   |
| 25 | <i>Dragomir et al</i> [5] | To evaluate the impact | <u>Design:</u> Retrospective | <u>Measure:</u> MPR    | Total           | <u>Type of Costs:</u> unadjusted and predicted    |
| 26 | 2010                      | of low adherence to    | cohort study                 | <u>Classification:</u> | Healthcare      | <u>Classification:</u> disease state specific and |
| 27 | Canada                    | statins on clinical    | <u>Follow Up:</u> 3 years    | MPR $\geq$ 80 =        | Costs           | hospitalized patients                             |
| 28 |                           | issues and direct      | <u>Sample Size:</u> 55134    | adherent, MPR <        | Pharmacy        | <u>Currency Year:</u> CAD, 2005                   |
| 29 |                           | healthcare costs.      | (A:28549, NA:26585)          | 80 = nonadherent       | Costs           | <u>Cost of Nonadherence:</u> Unadjusted           |
| 30 |                           |                        |                              | <u>Method of</u>       | Medical Costs   | Disease state specific:                           |
| 31 |                           |                        |                              | <u>Assessment:</u>     | Hospitalization | THC:\$6243 (\$6175.76), PC:\$2506                 |
| 32 |                           |                        |                              | pharmacy claims        | Costs           | (\$2479.01), MC:\$1241 (\$1227.63),               |
| 33 |                           |                        |                              | data                   |                 | HC:\$2496 (\$2469.12)                             |
| 34 |                           |                        |                              |                        |                 | Unadjusted Hospitalized patients:                 |
| 35 |                           |                        |                              |                        |                 | THC:\$14725 (\$14566.40), PC:\$3374               |
| 36 |                           |                        |                              |                        |                 | (\$3337.66), MC:\$2475 (\$2448.34),               |
| 37 |                           |                        |                              |                        |                 | HC:\$8876 (\$8780.40)                             |
| 38 |                           |                        |                              |                        |                 | Predicted disease state specific:                 |
| 39 |                           |                        |                              |                        |                 |                                                   |
| 40 |                           |                        |                              |                        |                 |                                                   |
| 41 |                           |                        |                              |                        |                 |                                                   |
| 42 |                           |                        |                              |                        |                 |                                                   |
| 43 |                           |                        |                              |                        |                 |                                                   |
| 44 |                           |                        |                              |                        |                 |                                                   |
| 45 |                           |                        |                              |                        |                 |                                                   |
| 46 |                           |                        |                              |                        |                 |                                                   |
| 47 |                           |                        |                              |                        |                 |                                                   |

|    |                          |                       |                              |                        |                                          |                                               |                             |
|----|--------------------------|-----------------------|------------------------------|------------------------|------------------------------------------|-----------------------------------------------|-----------------------------|
| 1  |                          |                       |                              |                        |                                          |                                               |                             |
| 2  |                          |                       |                              |                        |                                          |                                               |                             |
| 3  |                          |                       |                              |                        |                                          |                                               |                             |
| 4  |                          |                       |                              |                        | HC:\$2669 (\$2640.25)                    |                                               |                             |
| 5  |                          |                       |                              |                        | Predicted hospitalized patient: HC\$9214 |                                               |                             |
| 6  |                          |                       |                              |                        | (\$9114.76)                              |                                               |                             |
| 7  | <i>Pittman et al</i> [6] | To examine the        | <u>Design:</u> Retrospective | <u>Measure:</u> MPR    | Total                                    | <u>Type of Costs:</u> adjusted                | <u>Quality:</u> medium      |
| 8  | 2011                     | relation among statin | cohort study                 | <u>Classification:</u> | Healthcare                               | <u>Classification:</u> all cause and disease  | <u>Classification:</u> cost |
| 9  | US                       | adherence, subsequent | <u>Follow Up:</u> 18 months  | MPR $\geq$ 80 =        | Costs                                    | state specific                                | description                 |
| 10 |                          | hospitalizations and  | <u>Sample Size:</u> 381422   | >60<79% =              | Pharmacy                                 | <u>Currency Year:</u> USD, 2009               |                             |
| 11 |                          | healthcare costs.     | (A:258013, MA:65795,         | moderate               | Costs                                    | <u>Cost of Nonadherence*:</u> all cause:      |                             |
| 12 |                          |                       | LA:57614)                    | adherence, MPR         | Medical Costs                            | THC(>80):\$6798.67 (\$7505.66),               |                             |
| 13 |                          |                       |                              | <59 =low               |                                          | THC(60-79):\$7072.67 (\$7808.16),             |                             |
| 14 |                          |                       |                              | adherence              |                                          | THC(<59):\$7401.33 (\$8170.99),               |                             |
| 15 |                          |                       |                              | <u>Method of</u>       |                                          | PC(>80):\$1767.33 (\$1951.11),                |                             |
| 16 |                          |                       |                              | <u>Assessment:</u>     |                                          | PC(60-79):\$1789.33 (\$1975.40),              |                             |
| 17 |                          |                       |                              | pharmacy claims        |                                          | PC(<59):\$1937.33 (\$2138.79),                |                             |
| 18 |                          |                       |                              | data                   |                                          | MC(>80):\$4472.67 (\$4937.78),                |                             |
| 19 |                          |                       |                              |                        |                                          | MC(60-79):\$4840.67 (\$5344.05),              |                             |
| 20 |                          |                       |                              |                        |                                          | MC(<59):\$5138.67 (\$5673.04)                 |                             |
| 21 |                          |                       |                              |                        |                                          | Disease state specific:                       |                             |
| 22 |                          |                       |                              |                        |                                          | PC(>80):\$558.67 (\$616.77),                  |                             |
| 23 |                          |                       |                              |                        |                                          | PC(60-79):\$442.67 (\$488.70),                |                             |
| 24 |                          |                       |                              |                        |                                          | PC(<59):\$325.33 (\$359.16),                  |                             |
| 25 |                          |                       |                              |                        |                                          | MC(>80):\$1596.67 (\$1762.71),                |                             |
| 26 |                          |                       |                              |                        |                                          | MC(60-79):\$1722 (\$1901.07),                 |                             |
| 27 |                          |                       |                              |                        |                                          | MC(<59):\$1792.67 (\$1979.09)                 |                             |
| 28 |                          |                       |                              |                        |                                          |                                               |                             |
| 29 |                          |                       |                              |                        |                                          |                                               |                             |
| 30 |                          |                       |                              |                        |                                          |                                               |                             |
| 31 | <i>Pittman et al</i> [7] | To evaluate the       | <u>Design:</u> Retrospective | <u>Measure:</u> MPR    | Total                                    | <u>Type of Costs:</u> adjusted and unadjusted | <u>Quality:</u> medium      |
| 32 | 2010                     | relationship between  | cohort study                 | <u>Classification:</u> | Healthcare                               | <u>Classification:</u> disease state specific | <u>Classification:</u> cost |
| 33 | US                       | adherence to          | <u>Follow Up:</u> 2 years    | MPR $\geq$ 80 =        | Costs                                    | <u>Currency Year:</u> USD, 2008               | description                 |
| 34 |                          | antihypertensive      | <u>Sample Size:</u>          | adherent, MPR          | Outpatient                               | <u>Cost of Nonadherence:</u> Adjusted:        |                             |
| 35 |                          | medications and       | 625620(A:467006,             | >60<79% =              | Costs                                    | THC(>80):\$7261 (\$8077.79),                  |                             |
| 36 |                          | subsequent            | MA:96226, LA:62388)          | moderate               | ED Costs                                 | THC(60-79):\$7530 (\$8377.05),                |                             |
| 37 |                          | hospitalizations,     |                              | adherence, MPR         | Pharmacy                                 | THC(<59):\$7370 (\$8199.05),                  |                             |
| 38 |                          | emergency             |                              | <59 =low               | Costs                                    | OC(>80):\$3390 (\$3771.34),                   |                             |
| 39 |                          | department visits and |                              | adherence              | Hospitalization                          | OC(60-79):\$3705 (\$4121.77),                 |                             |
| 40 |                          |                       |                              |                        |                                          |                                               |                             |
| 41 |                          |                       |                              |                        |                                          |                                               |                             |
| 42 |                          |                       |                              |                        |                                          |                                               |                             |
| 43 |                          |                       |                              |                        |                                          |                                               |                             |
| 44 |                          |                       |                              |                        |                                          |                                               |                             |
| 45 |                          |                       |                              |                        |                                          |                                               |                             |
| 46 |                          |                       |                              |                        |                                          |                                               |                             |
| 47 |                          |                       |                              |                        |                                          |                                               |                             |

costs of care.

Method of Assessment:  
pharmacy claims data

Costs

OC(<59):\$3776 (\$4200.76),  
EDC(>80):\$101 (\$112.36),  
EDC(60-79):\$134 (\$149.07),  
EDC(<59):\$172 (\$191.35),  
PC(>80):\$2383 (\$2651.06),  
PC(60-79):\$1932 (\$2149.33),  
PC(<59):\$1509 (\$1678.75),  
HC(>80):\$1386 (\$1541.91),  
HC(60-79):\$1759 (\$1956.87),  
HC(<59):\$1913 (\$2128.19)  
Unadjusted:  
THC(>80):\$7182 (\$7989.90),  
THC(60-79):\$7560 (\$8410.42),  
THC(<59):\$7995 (\$8894.35),  
OC(>80):\$3396 (\$3778.01),  
OC(60-79):\$3635 (\$4043.90),  
OC(<59):\$3887 (\$4324.25),  
EDC(>80):\$102 (\$113.47),  
EDC(60-79):\$131 (\$145.74),  
EDC(<59):\$172 (\$191.35),  
PC(>80):\$2317 (\$2577.64),  
PC(60-79):\$2034 (\$2262.80),  
PC(<59):\$1880 (\$2091.48),  
HC(>80):\$1366 (\$1519.66),  
HC(60-79):\$1759 (\$1956.87),  
HC(<59):\$2057 (\$2288.39)

For peer review

Rizzo *et al*[8]  
1997  
US

To investigate variations in compliance with four classes of antihypertensive agents- diuretics, ACEIs, CCBs and β-

Design: Retrospective cohort study  
Follow Up: 12 months  
Sample Size: 7211(P:2668, NC:3101, NP:649, T:793)

Measure: ordinary least square regression analysis  
Classification: >80% = persistent, ≥30<80% = non-compliance, <30%

Total Healthcare Costs

Type of Costs: unadjusted  
Classification: all cause and disease state specific  
Currency Year: USD, 1994  
Cost of Nonadherence: All cause:  
THC(>80):\$341 (\$509.66),  
THC(30-80):\$694 (\$1037.26),

Quality: low  
Classification: cost description

blockers and the health care costs associated with various degrees of compliance.

= non-persistence  
Method of Assessment:  
 pharmacy claims data

THC(<30):\$735 (\$1098.53)  
 Disease state specific:  
 Renal:  
 THC(>80):\$2135 (\$3190.98),  
 THC(30-80):\$2488 (\$3718.58),  
 THC(<30):\$2529 (\$3779.86),  
 Acute MI:  
 THC(>80):\$1358 (\$2029.67),  
 THC(30-80):\$1711 (\$2557.27),  
 THC(<30):\$1752 (\$2618.55), Diabetes:  
 THC(>80):\$770 (\$1150.85),  
 THC(30-80):\$1123 (\$1678.44),  
 THC(<30):\$1164 (\$1739.72),  
 CHF:  
 THC(>80):\$698 (\$1043.23),  
 THC(30-80):\$1051 (\$1570.83),  
 THC(<30):\$1092 (\$1632.11),  
 Angina:  
 THC(>80):\$702 (\$1049.21),  
 THC(30-80):\$1055 (\$1576.81),  
 THC(<30):\$1096 (\$1638.09)  
Type of Costs: adjusted  
Classification: all cause and disease state specific  
Currency Year: USD, 1998  
Cost of Nonadherence: All cause:  
 Diabetes:  
 TC(1-19):\$16498 (\$23071.58),  
 TC(20-39):\$13077 (\$18287.49),  
 TC(40-59):\$12978 (\$18149.05),  
 TC(60-79):\$11484 (\$16059.77),  
 TC(80-100):\$8886 (\$12426.60),  
 PC(1-19):\$1312 (\$1834.76),

Sokol et al[9]  
 2005  
 US

To evaluate the impact of medication adherence on healthcare utilisation and cost for 4 chronic conditions that are major drivers of drug spending: diabetes, hypertension, hypercholesterolemia, and congestive heart failure.

Design: Retrospective cohort observational study  
Follow Up: 12 months  
Sample Size: 137277  
 Diabetes:(≥80: 1801, 60-79: 599, 40-59: 419, 20-39: 259, <19: 182)  
 Hypertension:(≥80: 5804, 60-79: 921, 40-59: 562, 20-39: 344, <19: 350)

Measure:  
 medication supply  
Classification: 1-19%, 20-39%, 40-59%, 60-79%, 80-100%  
Method of Assessment:  
 pharmacy claims data

Total Costs  
 Pharmacy Costs  
 Medical Costs

Quality: medium  
Classification: cost description

1  
2  
3  
4  
5  
6  
7  
8  
9  
10  
11  
12  
13  
14  
15  
16  
17  
18  
19  
20  
21  
22  
23  
24  
25  
26  
27  
28  
29  
30  
31  
32  
33  
34  
35  
36  
37  
38  
39  
40  
41  
42  
43  
44  
45  
46  
47

Hypercholesterolemia:  
(≥80: 1754, 60-79: 520,  
40-59: 324, 20-39: 216,  
<19: 167)  
CHF: (≥80: 518, 60-79:  
107, 40-59: 82, 20-39:  
70, <19: 86)

PC(20-39):\$1877 (\$2624.89),  
PC(40-59):\$1970 (\$2754.94),  
PC(60-79):\$2121 (\$2966.11),  
PC(80-100):\$2510 (\$3510.10),  
MC(1-19):\$15186 (\$21236.82),  
MC(20-39):\$11200 (\$15662.61),  
MC(40-59):\$11008 (\$15394.10),  
MC(60-79):\$9363 (\$13093.66),  
MC(80-100):\$6377 (\$8917.90),  
Hypertension:  
TC(1-19):\$9747 (\$13630.66),  
TC(20-39):\$11238 (\$15715.75),  
TC(40-59):\$9491 (\$13272.66),  
TC(60-79):\$8929 (\$12486.73),  
TC(80-100):\$8386 (\$11272.38),  
PC(1-19):\$916 (\$1280.98),  
PC(20-39):\$952 (\$1331.32),  
PC(40-59):\$1123 (\$1570.46),  
PC(60-79):\$1271 (\$1777.43),  
PC(80-100):\$1817 (\$2540.98),  
MC(1-19):\$8831 (\$12349.69),  
MC(20-39):\$10286 (\$14384.43),  
MC(40-59):\$8368 (\$11702.20),  
MC(60-79):\$7658 (\$10709.31),  
MC(80-100):\$6570 (\$9187.80),  
Hypercholesterolemia:  
TC(1-19):\$10916 (\$15265.45),  
TC(20-39):\$7982 (\$11162.40),  
TC(40-59):\$6756 (\$9447.91),  
TC(60-79):\$8412 (\$11763.74),  
TC(80-100):\$6752 (\$9442.31),  
PC(1-19):\$1067 (\$1492.14),  
PC(20-39):\$1152 (\$1611.01),

1  
2  
3  
4  
5  
6  
7  
8  
9  
10  
11  
12  
13  
14  
15  
16  
17  
18  
19  
20  
21  
22  
23  
24  
25  
26  
27  
28  
29  
30  
31  
32  
33  
34  
35  
36  
37  
38  
39  
40  
41  
42  
43  
44  
45  
46  
47

PC(40-59):\$1247 (\$1743.86),  
PC(60-79):\$1736 (\$2427.70),  
PC(80-100):\$1972 (\$2757.74),  
MC(1-19):\$9849(\$13773.30),  
MC(20-39):\$6830 (\$9551.39),  
MC(40-59):\$5509 (\$7704.04),  
MC(60-79):\$6676 (\$9336.03),  
MC(80-100):\$4780 (\$6684.58),  
CHF:  
TC(1-19):\$23964 (\$33512.38),  
TC(20-39):\$19188 (\$26833.40),  
TC(40-59):\$26311 (\$36794.54),  
TC(60-79):\$29785 (\$41652.74),  
TC(80-100):\$22164 (\$30995.18),  
PC(1-19):\$1961 (\$2742.35),  
PC(20-39):\$2055 (\$2873.81),  
PC(40-59):\$2208 (\$3087.77),  
PC(60-79):\$3412 (\$4771.50),  
PC(80-100):\$3107 (\$4344.97),  
MC(1-19):\$22003 (\$30770.03),  
MC(20-39):\$17133 (\$23959.59),  
MC(40-59):\$24103 (\$33706.77),  
MC(60-79):\$26373 (\$36881.24),  
MC(80-100):\$19056 (\$26648.81)  
Disease state specific: Diabetes:  
TC(1-19):\$8867 (\$12400.03),  
TC(20-39):\$7124 (\$9916.90),  
TC(40-59):\$6522 (\$9120.67),  
TC(60-79):\$6291 (\$8797.63),  
TC(80-100):\$4570 (\$6390.90),  
PC(1-19):\$55 (\$76.91),  
PC(20-39):\$165 (\$230.74),  
PC(40-59):\$285 (\$398.56),

1  
2  
3  
4  
5  
6  
7  
8  
9  
10  
11  
12  
13  
14  
15  
16  
17  
18  
19  
20  
21  
22  
23  
24  
25  
26  
27  
28  
29  
30  
31  
32  
33  
34  
35  
36  
37  
38  
39  
40  
41  
42  
43  
44  
45  
46  
47

PC(60-79):\$404 (\$564.97),  
PC(80-100):\$763 (\$1067.02),  
MC(1-19):\$8812 (\$12323.11),  
MC(20-39):\$6959 (\$9731.79),  
MC(40-59):\$6237 (\$8722.11),  
MC(60-79):\$5887 (\$8232.66),  
MC(80-100):\$3808 (\$5325.29),  
Hypertension:  
TC(1-19):\$4878 (\$6821.62),  
TC(20-39):\$6062 (\$8477.39),  
TC(40-59):\$5297 (\$7407.57),  
TC(60-79):\$5262 (\$7358.63),  
TC(80-100):\$4871 (\$6811.84),  
PC(1-19):\$31 (\$43.35),  
PC(20-39):\$89(\$124.46),  
PC(40-59):\$184 (\$257.31),  
PC(60-79):\$285 (\$398.56),  
PC(80-100):\$489 (\$683.84),  
MC(1-19):\$4847 (\$6778.27),  
MC(20-39):\$5973 (\$8352.92),  
MC(40-59):\$5113 (\$7150.26),  
MC(60-79):\$4977 (\$6960.07),  
MC(80-100):\$4383 (\$6129.39),  
Hypercholesterolemia:  
TC(1-19):\$6888 (\$9632.50),  
TC(20-39):\$4999 (\$6990.84),  
TC(40-59):\$3825 (\$5349.06),  
TC(60-79):\$5541 (\$7748.79),  
TC(80-100):\$3924(\$5487.51),  
PC(1-19):\$78 (\$109.08),  
PC(20-39):\$213 (\$297.87),  
PC(40-59):\$373 (\$521.62),  
PC(60-79):\$603 (\$843.26),



1  
2  
3  
4  
5  
6  
7  
8  
9  
10  
11  
12  
13  
14  
15  
16  
17  
18  
19  
20  
21  
22  
23  
24  
25  
26  
27  
28  
29  
30  
31  
32  
33  
34  
35  
36  
37  
38  
39  
40  
41  
42  
43  
44  
45  
46  
47

For peer review

PC(80-100):\$801 (\$1120.16),  
 MC(1-19):\$6810 (\$9523.42),  
 MC(20-39):\$4786 (\$6692.97),  
 MC(40-59):\$3452 (\$4827.44),  
 MC(60-79):\$4938 (\$6905.53),  
 MC(80-100):\$3124 (\$4368.75),  
 CHF:

TC(1-19):\$9841 (\$13762.12),  
 TC(20-39):\$7733 (\$10814.19),  
 TC(40-59):\$11378 (\$15911.53),  
 TC(60-79):\$13924 (\$19471.98),  
 TC(80-100):\$12698 (\$17787.48),  
 PC(1-19):\$15 (\$20.98),  
 PC(20-39):\$90 (\$125.86),  
 PC(40-59):\$134 (\$187.39),  
 PC(60-79):\$158 (\$220.95),  
 PC(80-100):\$437 (\$611.12),  
 MC(1-19):\$9826 (\$13741.14),  
 MC(20-39):\$7643 (\$10688.33),  
 MC(40-59):\$11244 (\$15724.14),  
 MC(60-79):\$13766 (\$19251.02),  
 MC(80-100):\$12261 (\$17146.36)

Stroupe *et al*[10]  
 2006  
 US

To determine the rates  
 of undersupply,  
 appropriate supply,  
 and oversupply of  
 antihypertensive drugs  
 as measured by refill  
 adherence, among  
 patient with  
 complicated and  
 uncomplicated  
 hypertension and to

Design: Retrospective  
 cohort study  
Follow Up: 3.3 years  
Sample Size: 15206  
 (not specified)

Measure: MPR  
Classification:  
 MPR<80 =  
 undersupply, MPR  
 >120 = oversupply  
Method of  
Assessment:  
 pharmacy claims  
 data

Total  
 Healthcare  
 Costs  
 Inpatient  
 Costs  
 Outpatient  
 Costs  
 Pharmacy  
 Costs

Type of Costs: unadjusted  
Classification: disease state specific  
Currency Year: USD, 2002  
Cost of Nonadherence \*\*: THC:\$6032.5  
 (\$7830.11), IC:\$2067 (\$2682.94),  
 OC:\$3965 (\$5146.52), PC:\$130  
 (\$168.74)

Quality: medium  
Classification: cost  
 description

examine the association of refill adherence with hospitalization and healthcare costs among these patients.

10 *Wu et al*[11]  
11 2011  
12 US

To study statin adherence and assess associated medical utilisation and healthcare costs in patients with type 2 diabetes, based on national Medicaid database.

Design: Retrospective cohort study  
Follow Up: 1 year  
Sample Size: 1705 (A:624, NA:1081)

Measure: MPR  
Classification: MPR≥80 = adherent, MPR <80 = nonadherent  
Method of Assessment: pharmacy claims data

Total Healthcare Costs  
Pharmacy Costs  
Medical Costs

Type of Costs: adjusted  
Classification: all cause and disease state specific  
Currency Year: USD, 2005  
Cost of Nonadherence: all cause: THC:\$17807 (\$21370.30), PC:\$4915 (\$5898.52) MC:\$12892 (\$15471.77)  
Disease state specific: THC:\$2789 (\$3347.10), PC:\$489(\$586.85) MC:\$2300 (\$2760.25)

Quality: medium  
Classification: cost description

22 *Zhao et al*[12]  
23 2014  
24 US

To evaluate the associations between statin adherence level, healthcare costs, hospital admissions and emergency room visits after statin therapy is taken for 1 year.

Design: Retrospective cohort study  
Follow Up: 1 year  
Sample Size: 10312 (96-100: 2453, 90-95: 1496, 85-89: 584, 80-84: 768, 70-79: 960, 60-69: 777, 40-59: 1687, <40:1587)

Measure: MPR  
Classification: <40%, 40-59%, 60-69%, 70-79%, 80-84%, 85-89%, 90-95%, 96-100%  
Method of Assessment: pharmacy claims data, census data

Total Healthcare Costs  
Pharmacy Costs  
Medical Costs

Type of Costs: unadjusted  
Classification: all cause and disease state specific  
Currency Year: USD, 2010  
Cost of Nonadherence: all cause: PC(96-100):\$2976.80 (\$3247.04), PC(90-95):\$2826.99 (\$3083.63), PC(85-89):\$2795.39 (\$3049.16), PC(80-84):\$2690.89 (\$2935.17), PC(70-79):\$2192.83 (\$2391.90), PC(60-69):\$2323.27 (\$2534.18), PC(40-59):\$2153.93 (\$2349.47), PC(<40):\$1749.18 (\$1907.97)  
Disease state specific: THC(96-100):\$6536.05 (\$7129.40), THC(90-95):\$6493.80 (\$7083.31), THC(85-89):\$6459.40 (\$7045.79),

Quality: medium  
Classification: cost description

1  
2  
3  
4  
5  
6  
7  
8  
9  
10  
11  
12  
13  
14  
15  
16  
17  
18  
19  
20  
21  
22  
23  
24  
25  
26  
27  
28  
29  
30  
31  
32  
33  
34  
35  
36  
37  
38  
39  
40  
41  
42  
43  
44  
45  
46  
47

For peer review

THC(80-84):\$6227.47 (\$6792.80),  
THC(70-79):\$5713.47 (\$6232.14),  
THC(60-69):\$5875.26 (\$6408.62),  
THC(40-59):\$5817.58 (\$6345.70),  
THC(<40):\$5249.12 (\$5725.64),  
PC(96-100):\$449.86 (\$490.70), PC(90-95):\$439.74 (\$479.66),  
PC(85-89):\$458.83 (\$500.48),  
PC(80-84):\$423.15 (\$461.56),  
PC(70-79):\$356.74 (\$389.13),  
PC(60-69):\$371.30 (\$405.01),  
PC(40-59):\$279.21 (\$304.56),  
PC(<40):\$133.92 (\$146.08),  
MC(96-100):\$3559.25 (\$3882.36),  
MC(90-95):\$3666.81 (\$3999.69),  
MC(85-89):\$3664 (\$3996.62), MC(80-84):\$3586.58 (\$3912.17), MC(70-79):\$3520.64 (\$3840.25), MC(60-69):\$3551.99 (\$3874.44), MC(40-59):\$3663.65 (\$3996.24),  
MC(<40):\$3499.95 (\$3817.68)

**Mental Health**

|                                                                                                                                                                                                                         |                                                                                                                            |                                                                                                                                                             |                                                                                                        |                                                                                                                                                                                                                                                            |                                                                           |
|-------------------------------------------------------------------------------------------------------------------------------------------------------------------------------------------------------------------------|----------------------------------------------------------------------------------------------------------------------------|-------------------------------------------------------------------------------------------------------------------------------------------------------------|--------------------------------------------------------------------------------------------------------|------------------------------------------------------------------------------------------------------------------------------------------------------------------------------------------------------------------------------------------------------------|---------------------------------------------------------------------------|
| <p><i>Bagalman et al</i>[13]<br/>2010<br/>US</p> <p>To examine the association between treatment adherence and indirect productivity costs within a cohort of commercially insured employees with bipolar disorder.</p> | <p><u>Design:</u> Retrospective cohort study<br/><u>Follow Up:</u> 1 year<br/><u>Sample Size:</u> 1258 (A:444, NA:814)</p> | <p><u>Measure:</u> MPR<br/><u>Classification:</u><br/>MPR≥80 = adherent, MPR &lt;80 = nonadherent<br/><u>Method of Assessment:</u> pharmacy claims data</p> | <p>Total Costs<br/>Short term disability cost<br/>Workers compensation cost<br/>Paid time off cost</p> | <p><u>Type of Costs:</u> adjusted<br/><u>Classification:</u> disease state specific<br/><u>Currency Year:</u> USD, 2005<br/><u>Cost of Nonadherence:</u> TC:\$6894 (\$8273.53), STDC:\$2134 (\$2561.03), WCC:\$762 (\$914.48), PTOC:\$3998 (\$4798.03)</p> | <p><u>Quality:</u> medium<br/><u>Classification:</u> cost description</p> |
| <p><i>Becker et al</i>[14]</p>                                                                                                                                                                                          | <p><u>Design:</u> Retrospective</p>                                                                                        | <p><u>Measure:</u></p>                                                                                                                                      | <p>Total Costs</p>                                                                                     | <p><u>Type of Costs:</u> unadjusted</p>                                                                                                                                                                                                                    | <p><u>Quality:</u> low</p>                                                |

|    |                         |                          |                              |                            |                 |                                               |
|----|-------------------------|--------------------------|------------------------------|----------------------------|-----------------|-----------------------------------------------|
| 1  |                         |                          |                              |                            |                 |                                               |
| 2  |                         |                          |                              |                            |                 |                                               |
| 3  | 2007                    | outcomes and costs       | cohort study                 | prescription refill        |                 | <u>Classification:</u> disease state specific |
| 4  | US                      | associated with          | <u>Follow Up:</u> 2 years    | rate                       |                 | <u>Classification:</u> cost                   |
| 5  |                         | adherence rates by       | <u>Sample Size:</u> 10330    | <u>Classification:</u> 75- |                 | <u>Currency Year:</u> USD, 2006               |
| 6  |                         | antipsychotic            | (>75%:6609, 50-              | 100% = maximal             |                 | <u>Cost of Nonadherence</u> * :               |
| 7  |                         | medication class for     | 74%:1276, 25-                | adherence, 50-             |                 | TC(75-100):\$13564 (\$15792.91),              |
| 8  |                         | Medicaid beneficiaries.  | 49%:1940, <25%:505)          | 74.9% = moderate           |                 | TC(50-74):\$13772 (\$16035.09),               |
| 9  |                         |                          |                              | adherence, 25-             |                 | TC(25-49):\$15792 (\$18387.03),               |
| 10 |                         |                          |                              | 49.9% = minimal            |                 | TC(<25):\$16156 (\$18810.84)                  |
| 11 |                         |                          |                              | adherence, <25%            |                 |                                               |
| 12 |                         |                          |                              | = negligible               |                 |                                               |
| 13 |                         |                          |                              | adherence                  |                 |                                               |
| 14 |                         |                          |                              | <u>Method of</u>           |                 |                                               |
| 15 |                         |                          |                              | <u>Assessment:</u>         |                 |                                               |
| 16 |                         |                          |                              | pharmacy claims            |                 |                                               |
| 17 |                         |                          |                              | data                       |                 |                                               |
| 18 |                         |                          |                              | <u>Measure:</u>            | Inpatient costs | <u>Type of Costs:</u> unadjusted              |
| 19 | <i>Eddy et al[15]</i>   | To evaluate the effect   | <u>Design:</u> Retrospective | continuous                 | Outpatient      | <u>Classification:</u> disease state specific |
| 20 | 2005                    | of partial compliance    | database analysis            | multiple interval          | costs           | <u>Currency Year:</u> USD, 2002               |
| 21 | US                      | of patients with         | <u>Follow Up:</u> 1 year     | medications                | Pharmacy        | <u>Cost of Nonadherence</u> * :               |
| 22 |                         | prescribed oral atypical | <u>Sample Size:</u> 7864     | available                  | costs           | IC:\$3780 (\$4906.39),                        |
| 23 |                         | and conventional         | (<80%:2655, 80-              | <u>Classification:</u>     | Medical costs   | OC:\$504 (\$654.19),                          |
| 24 |                         | antipsychotic agents     | 125%:5065,                   | <80% = partially           | Physician       | PC:\$1872 (\$2429.83),                        |
| 25 |                         | and the corresponding    | >125%:144)                   | compliant, 80-             | office visit    | MC:\$6228 (\$8083.86),                        |
| 26 |                         | impact on resource       |                              | 125% = compliant,          | costs           | POC:\$1944 (\$2523.29)                        |
| 27 |                         | utilisation.             |                              | >125% = overly             | Other costs     | OtC:\$12 (\$15.58)                            |
| 28 |                         |                          |                              | compliant                  |                 |                                               |
| 29 |                         |                          |                              | <u>Method of</u>           |                 |                                               |
| 30 |                         |                          |                              | <u>Assessment:</u>         |                 |                                               |
| 31 |                         |                          |                              | pharmacy claims            |                 |                                               |
| 32 |                         |                          |                              | data                       |                 |                                               |
| 33 |                         |                          |                              | <u>Measure:</u>            | Total costs     | <u>Type of Costs:</u> adjusted                |
| 34 | <i>Gilmer et al[16]</i> | To evaluate the          | <u>Design:</u> Retrospective | cumulative                 | Outpatient      | <u>Classification:</u> disease state specific |
| 35 | 2004                    | relationship between     | database analysis            | possession ratio           | costs           | <u>Currency Year:</u> USD, 1999               |
| 36 | US                      | adherence to             | <u>Follow Up:</u> 1 year     |                            |                 | <u>Classification:</u> cost                   |
| 37 |                         |                          |                              |                            |                 | description                                   |
| 38 |                         |                          |                              |                            |                 |                                               |
| 39 |                         |                          |                              |                            |                 |                                               |
| 40 |                         |                          |                              |                            |                 |                                               |
| 41 |                         |                          |                              |                            |                 |                                               |
| 42 |                         |                          |                              |                            |                 |                                               |
| 43 |                         |                          |                              |                            |                 |                                               |
| 44 |                         |                          |                              |                            |                 |                                               |
| 45 |                         |                          |                              |                            |                 |                                               |
| 46 |                         |                          |                              |                            |                 |                                               |
| 47 |                         |                          |                              |                            |                 |                                               |

treatment with antipsychotic medication and health expenditures. Secondary objective was to identify risk factors predictive of non-adherence.

Sample Size: 1619 (<49%:388, 50-79%:259, 80-100%:664, >110%:308)

Classification: <49% = nonadherent, 50-79% = partially adherent, 80-100% = adherent, >110% = excess medication fillers

Pharmacy costs  
Hospitalization costs

Cost of Nonadherence:  
TC:\$8168 (\$11261.74),  
OC:\$3464 (\$4776.04),  
PC:\$1542 (\$2126.05),  
HC:\$3413 (\$4705.72)

Method of Assessment:  
pharmacy claims data

Hong et al[17]  
2011  
UK

To investigate clinical and economic consequences of medication non-adherence in the treatment of bipolar disorder following a manic or mixed episode.

Design: Prospective observational study  
Follow Up: 21 months  
Sample Size: 1341(A:1024, NA:317)

Measure: assessed by treating psychiatrist  
Classification: adherent vs. nonadherent  
Method of Assessment: observational assessment

Total costs  
Inpatient costs  
Outpatient costs  
Pharmacy costs  
Hospitalization costs

Type of Costs: unadjusted  
Classification: all cause and disease state specific  
Currency Year: GBP, 2008  
Cost of Nonadherence \*: all cause:  
PC:£55.43 (\$94.47)  
Disease state specific:  
TC:£5846.29 (\$9964.10)  
IC:£2740.57 (\$4670.88),  
OC:£1082.86 (\$1845.57),  
PC:£1630.29 (\$2778.58),  
HC:£337.14 (\$574.60)

Quality: medium  
Classification: cost description

Jiang et al[18]  
2015  
US

To estimate the impact of adherence to and persistence with atypical antipsychotics on healthcare costs and risk of hospitalization by controlling potential sources of endogeneity

Design: Retrospective cohort study  
Follow Up: 2 years  
Sample Size: 32374 (A:11642, NA:20732)

Measure: PDC  
Classification: (PDC≥80% = adherent, PDC<80% = nonadherent)  
Method of Assessment: medical and

Total costs  
Pharmacy costs  
Medical services costs

Type of Costs: unadjusted  
Classification: disease state specific  
Currency Year: USD, 2011  
Cost of Nonadherence:  
Disease state specific:  
TC:\$14141 (\$14517.37)  
PC:\$3971 (\$4076.69),  
MSC:\$10170 (\$10440.68)

Quality: low  
Classification: cost description

|    |                        |                         |                              |                        |                 |                                               |
|----|------------------------|-------------------------|------------------------------|------------------------|-----------------|-----------------------------------------------|
| 1  |                        |                         |                              |                        |                 |                                               |
| 2  |                        |                         |                              |                        |                 |                                               |
| 3  |                        |                         | pharmacy claims              |                        |                 |                                               |
| 4  |                        |                         | data                         |                        |                 |                                               |
| 5  |                        |                         |                              |                        |                 |                                               |
| 6  | <i>Joe et al[19]</i>   | To investigate the      | <u>Design:</u> Retrospective | <u>Measure:</u>        | Total costs     | <u>Type of Costs:</u> adjusted                |
| 7  | 2016                   | association between     | cohort study                 | percentage of          |                 | <u>Classification:</u> all cause and disease  |
| 8  | South Korea            | psychiatric medication  | <u>Follow Up:</u> 1 year     | days of psychiatric    |                 | state specific                                |
| 9  |                        | non-compliance and      | <u>Sample Size:</u> 7848     | prescription (PDP)     |                 | <u>Currency Year:</u> USD, 2011               |
| 10 |                        | psychiatric and non-    | (A:2774, NA:2774,            | <u>Classification:</u> |                 | <u>Cost of Nonadherence:</u> all cause:       |
| 11 |                        | psychiatric service     | P:1956, NP:1956)             | PDP≥80% =              |                 | TC:\$4961 (\$5271.40)                         |
| 12 |                        | utilisation and costs.  |                              | adherent,              |                 | Disease state specific:                       |
| 13 |                        |                         |                              | PDP<80% =              |                 | TC:\$3061 (\$3252.50)                         |
| 14 |                        |                         |                              | nonadherent;           |                 |                                               |
| 15 |                        |                         |                              | persistent =           |                 |                                               |
| 16 |                        |                         |                              | continued              |                 |                                               |
| 17 |                        |                         |                              | medication             |                 |                                               |
| 18 |                        |                         |                              | without                |                 |                                               |
| 19 |                        |                         |                              | interruption ≥ 56      |                 |                                               |
| 20 |                        |                         |                              | day, non-              |                 |                                               |
| 21 |                        |                         |                              | persistent = at        |                 |                                               |
| 22 |                        |                         |                              | least one              |                 |                                               |
| 23 |                        |                         |                              | medication             |                 |                                               |
| 24 |                        |                         |                              | interruption > 56      |                 |                                               |
| 25 |                        |                         |                              | days                   |                 |                                               |
| 26 |                        |                         |                              | <u>Method of</u>       |                 |                                               |
| 27 |                        |                         |                              | <u>Assessment:</u>     |                 |                                               |
| 28 |                        |                         |                              | health insurance       |                 |                                               |
| 29 |                        |                         |                              | data                   |                 |                                               |
| 30 |                        |                         |                              |                        |                 |                                               |
| 31 |                        |                         |                              |                        |                 |                                               |
| 32 |                        |                         |                              |                        |                 |                                               |
| 33 | <i>Knapp et al[20]</i> | To assess the relative  | <u>Design:</u> Retrospective | <u>Measure:</u> self-  | Total costs     | <u>Type of Costs:</u> predicted               |
| 34 | 2004                   | impact of non-          | cohort study                 | report                 | Inpatient costs | <u>Classification:</u> disease state specific |
| 35 | UK                     | adherence and other     | <u>Follow Up:</u> 1 year     | <u>Classification:</u> | External        | <u>Currency Year:</u> GBP, 2001               |
| 36 |                        | factors associated with | <u>Sample Size:</u> 658      | adherent vs.           | services costs  | <u>Cost of Nonadherence:</u>                  |
| 37 |                        | resource use and costs  | (A:549, NA:109)              | nonadherent            |                 | TC:£57580 (\$116434.12)                       |
| 38 |                        | incurred by people      |                              | <u>Method of</u>       |                 | IC:£6714 (\$13576.57),                        |
| 39 |                        | with schizophrenia.     |                              | <u>Assessment:</u>     |                 | ESC:£1603 (\$3241.47)                         |
| 40 |                        |                         |                              |                        |                 |                                               |
| 41 |                        |                         |                              |                        |                 |                                               |
| 42 |                        |                         |                              |                        |                 |                                               |
| 43 |                        |                         |                              |                        |                 |                                               |
| 44 |                        |                         |                              |                        |                 |                                               |
| 45 |                        |                         |                              |                        |                 |                                               |
| 46 |                        |                         |                              |                        |                 |                                               |
| 47 |                        |                         |                              |                        |                 |                                               |

|    |                            |                         |                              |                         |                 |                                               |                             |
|----|----------------------------|-------------------------|------------------------------|-------------------------|-----------------|-----------------------------------------------|-----------------------------|
| 1  |                            |                         |                              | survey                  |                 |                                               |                             |
| 2  |                            |                         |                              |                         |                 |                                               |                             |
| 3  |                            |                         |                              |                         |                 |                                               |                             |
| 4  | <i>Offord et al[21]</i>    | To quantify early       | <u>Design:</u> Retrospective | <u>Measure:</u> time to | Total costs     | <u>Type of Costs:</u> adjusted                | <u>Quality:</u> medium      |
| 5  | 2013                       | nonadherence to         | cohort study                 | discontinuation         | Outpatient      | <u>Classification:</u> all cause and disease  | <u>Classification:</u> cost |
| 6  | US                         | antipsychotic           | <u>Follow Up:</u> 1 year     | <u>Classification:</u>  | costs           | state specific                                | description                 |
| 7  |                            | medications in patients | <u>Sample Size:</u> 1462     | adherent vs.            | Pharmacy        | <u>Currency Year:</u> USD, 2008               |                             |
| 8  |                            | with schizophrenia and  | (A:589, NA:873)              | nonadherent             | costs           | <u>Cost of Nonadherence:</u> all cause:       |                             |
| 9  |                            | its impact on short-    |                              | <u>Method of</u>        | Hospitalization | TC:\$15400 (\$17132.34)                       |                             |
| 10 |                            | term antipsychotic      |                              | <u>Assessment:</u>      | costs           | OC:\$5773 (\$6422.40),                        |                             |
| 11 |                            | adherence, healthcare   |                              | pharmacy claims         |                 | PC:\$3777 (\$4201.87),                        |                             |
| 12 |                            | utilisation and costs.  |                              | data                    |                 | HC:\$5850 (\$6508.06)                         |                             |
| 13 |                            |                         |                              |                         |                 | Disease state specific:                       |                             |
| 14 |                            |                         |                              |                         |                 | TC:\$5358 (\$5960.72)                         |                             |
| 15 |                            |                         |                              |                         |                 | OC:\$858 (\$954.52),                          |                             |
| 16 |                            |                         |                              |                         |                 | PC:\$1549 (\$1723.25),                        |                             |
| 17 |                            |                         |                              |                         |                 | HC:\$2952 (\$3284.07)                         |                             |
| 18 |                            |                         |                              |                         |                 |                                               |                             |
| 19 |                            |                         |                              |                         |                 |                                               |                             |
| 20 | <i>Offord et al[22]</i>    | To examine the impact   | <u>Design:</u> Retrospective | <u>Measure:</u> MPR     | Inpatient       | <u>Type of Costs:</u> adjusted                | <u>Quality:</u> low         |
| 21 | 2013                       | of medication           | cohort study                 | <u>Classification:</u>  | costs           | <u>Classification:</u> all cause and disease  | <u>Classification:</u> cost |
| 22 | US                         | adherence on            | <u>Follow Up:</u> 1 year     | MPR $\geq$ 70= high     | Pharmacy        | state specific                                | description                 |
| 23 |                            | healthcare utilisation  | <u>Sample Size:</u> 354      | adherence, MPR <        | costs           | <u>Currency Year:</u> USD, 2008               |                             |
| 24 |                            | among Medicare          | (A:126, NA:228)              | 70 = low                |                 | <u>Cost of Nonadherence:</u> all cause:       |                             |
| 25 |                            | insured schizophrenia   |                              | adherence               |                 | IC:\$9053 (\$10071.37),                       |                             |
| 26 |                            | patients.               |                              | <u>Method of</u>        |                 | PC:\$4267 (\$4746.99),                        |                             |
| 27 |                            |                         |                              | <u>Assessment:</u>      |                 | Disease state specific:                       |                             |
| 28 |                            |                         |                              | pharmacy claims         |                 | IC:\$2468 (\$2745.62),                        |                             |
| 29 |                            |                         |                              | data                    |                 | PC:\$1085 (\$1207.05)                         |                             |
| 30 |                            |                         |                              |                         |                 |                                               |                             |
| 31 |                            |                         |                              |                         |                 |                                               |                             |
| 32 | <i>Robertson et al[23]</i> | To examine the impact   | <u>Design:</u> Retrospective | <u>Measure:</u> MPR     | Total costs     | <u>Type of Costs:</u> unadjusted              | <u>Quality:</u> medium      |
| 33 | 2014                       | of the combination of   | cohort study                 | <u>Classification:</u>  | Inpatient costs | <u>Classification:</u> disease state specific | <u>Classification:</u> cost |
| 34 | US                         | treatment utilization   | <u>Follow Up:</u> 90 days    | MPR $\geq$ 80% =        | Outpatient      | <u>Currency Year:</u> USD, 2005               | description                 |
| 35 |                            | and medication          | <u>Sample Size:</u> 1376     | adherent                | costs           | <u>Cost of Nonadherence*:</u>                 |                             |
| 36 |                            | possession on arrest    | (90/90:637, 60/90:240,       | <u>Method of</u>        | Emergency       | TC(90/90):\$28068 (\$33495.65),               |                             |
| 37 |                            | and incarceration       | 30/90:174, 0/90:316)         | <u>Assessment:</u>      | department      | TC(60/90):\$21720 (\$25920.11),               |                             |
| 38 |                            | outcomes and on         |                              | Medicaid claims         | costs           | TC(30/90):\$21084 (\$25161.12),               |                             |
| 39 |                            | costs.                  |                              | data                    | Pharmacy        | TC(0/90):\$12516 (\$14936.28),                |                             |
| 40 |                            |                         |                              |                         |                 |                                               |                             |
| 41 |                            |                         |                              |                         |                 |                                               |                             |
| 42 |                            |                         |                              |                         |                 |                                               |                             |
| 43 |                            |                         |                              |                         |                 |                                               |                             |
| 44 |                            |                         |                              |                         |                 |                                               |                             |
| 45 |                            |                         |                              |                         |                 |                                               |                             |
| 46 |                            |                         |                              |                         |                 |                                               |                             |
| 47 |                            |                         |                              |                         |                 |                                               |                             |

1  
2  
3  
4  
5  
6  
7  
8  
9  
10  
11  
12  
13  
14  
15  
16  
17  
18  
19  
20  
21  
22  
23  
24  
25  
26  
27  
28  
29  
30  
31  
32  
33  
34  
35  
36  
37  
38  
39  
40  
41  
42  
43  
44  
45  
46  
47

For peer review

costs IC(90/90):\$12168 (\$14520.99),  
 Target case IC(60/90):\$10068 (\$12014.90),  
 management IC(30/90):\$11376 (\$13575.84),  
 costs IC(0/90):\$5592 (\$6673.35),  
 Psychiatric OC(90/90):\$6468 (\$7718.75),  
 assessment OC(60/90):\$4152 (\$4954.89),  
 costs OC(30/90):\$2916 (\$3479.88),  
 Arrest costs OC(0/90):\$2136 (\$2549.05),  
 Incarceration EDC(90/90):\$96 (\$114.56),  
 costs EDC(60/90):\$108 (\$128.88),  
 EDC(30/90):\$144 (\$171.85),  
 EDC(0/90):\$84 (\$100.24),  
 PC(90/90):\$5316 (\$6343.98),  
 PC(60/90):\$3468 (\$4138.63),  
 PC(30/90):\$2232 (\$2663.61),  
 PC(0/90):\$984 (\$1174.28),  
 TCMC(90/90):\$2100 (\$2506.09),  
 TCMC(60/90):\$1404 (\$1675.50),  
 TCMC(30/90):\$1596 (\$1904.63),  
 TCMC(0/90):\$516 (\$615.78),  
 PAC(90/90):\$240 (\$286.41),  
 PAC(60/90):\$228 (\$272.09),  
 PAC(30/90):\$204 (\$243.45),  
 PAC(0/90):\$156 (\$186.17),  
 ArC(90/90):\$780 (\$930.83),  
 ArC(60/90):\$1032 (\$1231.56),  
 ArC(30/90):\$1140 (\$1360.45),  
 ArC(0/90):\$1200 (\$1432.05),  
 InC(90/90):\$888 (\$1059.72),  
 InC(60/90):\$1272 (\$1517.97),  
 InC(30/90):\$1476 (\$1761.42),  
 InC(0/90):\$1860 (\$2219.68)

Robinson et al[24] To determine if the Design: Retrospective Measure: Total costs Type of Costs: unadjusted Quality: medium



|    |                    |                        |                              |                            |                 |                                               |                             |
|----|--------------------|------------------------|------------------------------|----------------------------|-----------------|-----------------------------------------------|-----------------------------|
| 1  |                    |                        |                              |                            |                 |                                               |                             |
| 2  |                    |                        |                              |                            |                 |                                               |                             |
| 3  | 2006               | type of antidepressant | claims analysis              | Antidepressant             | Inpatient       | <u>Classification:</u> all cause and disease  | <u>Classification:</u> cost |
| 4  | US                 | drug is related to     | <u>Follow Up:</u> 6 months   | medication                 | costs           | state specific                                | description                 |
| 5  |                    | adherence and assess   | <u>Sample Size:</u> 60386    | management                 | Outpatient      | <u>Currency Year:</u> USD, 2004               |                             |
| 6  |                    | the 6 month health     | (A:11526, NA:8860)           | measures                   | costs           | <u>Cost of Nonadherence*:</u> all cause:      |                             |
| 7  |                    | care costs among       |                              | <u>Classification:</u>     | ED visit costs  | TC:\$12658 (\$15678.21)                       |                             |
| 8  |                    | newly diagnosed        |                              | meeting less than          | Pharmacy        | IC:\$3006 (\$3723.24),                        |                             |
| 9  |                    | patients.              |                              | <3 medication              | costs           | OC:\$6118 (\$7577.76),                        |                             |
| 10 |                    |                        |                              | management                 | Physician       | EDC:\$334 (\$413.69)                          |                             |
| 11 |                    |                        |                              | measures =                 | office visit    | PC:\$3200 (\$3963.52),                        |                             |
| 12 |                    |                        |                              | nonadherent                | costs           | POC:\$178 (\$220.47)                          |                             |
| 13 |                    |                        |                              | <u>Method of</u>           |                 | Disease state specific:                       |                             |
| 14 |                    |                        |                              | <u>Assessment:</u>         |                 | TC:\$2028 (\$2511.88)                         |                             |
| 15 |                    |                        |                              | pharmacy claims            |                 | IC:\$102 (\$126.34),                          |                             |
| 16 |                    |                        |                              | data, Medicaid             |                 | OC:\$734 (\$909.13),                          |                             |
| 17 |                    |                        |                              | data,                      |                 | EDC:\$18 (\$22.29)                            |                             |
| 18 |                    |                        |                              | observational              |                 | PC:\$1174 (\$1454.12),                        |                             |
| 19 |                    |                        |                              | assessment                 |                 | POC:\$120 (\$148.63)                          |                             |
| 20 |                    |                        |                              | <u>Measure:</u> quarter    | Hospitalization | <u>Type of Costs:</u> unadjusted              | <u>Quality:</u> medium      |
| 21 | Svarstad et al[25] | To examine the         | <u>Design:</u> Retrospective | pharmacy claims            | costs           | <u>Classification:</u> all cause and disease  | <u>Classification:</u> cost |
| 22 | 2001               | relationship of        | database analysis            | <u>Classification:</u> one |                 | state specific                                | description                 |
| 23 | US                 | medication non-        | <u>Follow Up:</u> 1 year     | or more quarters           |                 | <u>Currency Year:</u> USD, 1990               |                             |
| 24 |                    | adherence to hospital  | <u>Sample Size:</u> 619      | without a claim =          |                 | <u>Cost of Nonadherence:</u> all cause:       |                             |
| 25 |                    | use and costs among    | (A:413, NA:206)              | nonadherent                |                 | HC:\$3992 (\$6593.06)                         |                             |
| 26 |                    | severely mentally ill  |                              | <u>Method of</u>           |                 | Disease state specific:                       |                             |
| 27 |                    | clients.               |                              | <u>Assessment:</u>         |                 | Schizophrenia/schizo affective disorder:      |                             |
| 28 |                    |                        |                              | pharmacy claims            |                 | HC:\$3421 (\$5650.01)                         |                             |
| 29 |                    |                        |                              | data, previous             |                 | Bipolar disorder:                             |                             |
| 30 |                    |                        |                              | study data                 |                 | HC:\$9701 (\$16021.85),                       |                             |
| 31 |                    |                        |                              |                            |                 | Other severe mental illness:                  |                             |
| 32 |                    |                        |                              |                            |                 | HCD:\$3024 (\$4994.34)                        |                             |
| 33 |                    |                        |                              |                            |                 | <u>Type of Costs:</u> adjusted                | <u>Quality:</u> medium      |
| 34 | White et al[26]    | To evaluate the        | <u>Design:</u> Retrospective | <u>Measure:</u> MPR        | Total costs     | <u>Classification:</u> disease state specific | <u>Classification:</u> cost |
| 35 | 2003               | economic impact of     | database analysis            | <u>Classification:</u>     | Pharmacy        | <u>Currency Year:</u> USD, 1999               | description                 |
| 36 | US                 | antidepressant         | <u>Follow Up:</u> 6 months   | MPR≥70% =                  | costs           |                                               |                             |
| 37 |                    |                        |                              |                            |                 |                                               |                             |
| 38 |                    |                        |                              |                            |                 |                                               |                             |
| 39 |                    |                        |                              |                            |                 |                                               |                             |
| 40 |                    |                        |                              |                            |                 |                                               |                             |
| 41 |                    |                        |                              |                            |                 |                                               |                             |
| 42 |                    |                        |                              |                            |                 |                                               |                             |
| 43 |                    |                        |                              |                            |                 |                                               |                             |
| 44 |                    |                        |                              |                            |                 |                                               |                             |
| 45 |                    |                        |                              |                            |                 |                                               |                             |
| 46 |                    |                        |                              |                            |                 |                                               |                             |
| 47 |                    |                        |                              |                            |                 |                                               |                             |

|    |                          |                          |                              |                        |                 |                                               |
|----|--------------------------|--------------------------|------------------------------|------------------------|-----------------|-----------------------------------------------|
| 1  |                          |                          |                              |                        |                 |                                               |
| 2  |                          |                          |                              |                        |                 |                                               |
| 3  |                          |                          |                              |                        |                 |                                               |
| 4  |                          | treatment adherence      | <u>Sample Size:</u> 14190    | adherent,              | Medical costs   | <u>Cost of Nonadherence:</u>                  |
| 5  |                          | among patients           | (A:5638, NA:8552)            | MPR<70% =              |                 | TC:\$11815 (\$16290.09)                       |
| 6  |                          | treated for depression   |                              | nonadherent            |                 | PC:\$1123 (\$1548.35),                        |
| 7  |                          |                          |                              | <u>Method of</u>       |                 | MC:\$10692 (\$14741.74)                       |
| 8  |                          |                          |                              | <u>Assessment:</u>     |                 |                                               |
| 9  |                          |                          |                              | pharmacy claims        |                 |                                               |
| 10 |                          |                          |                              | data                   |                 |                                               |
| 11 | <b>Diabetes</b>          |                          |                              |                        |                 |                                               |
| 12 | <i>An et al[27]</i>      | This study evaluated     | <u>Design:</u> Prospective   | <u>Measure:</u> MPR    | Total costs     | <u>Type of Costs:</u> unadjusted              |
| 13 | 2014                     | the association          | cohort study                 | <u>Classification:</u> | Outpatient      | <u>Classification:</u> disease state specific |
| 14 | Korea                    | between medication       | <u>Follow Up:</u> 3 years    | MPR≥90% =              | costs           | <u>Currency Year:</u> USD, 2007               |
| 15 |                          | adherence and            | <u>Sample Size:</u> 608      | adherent,              | Hospitalization | <u>Cost of Nonadherence*:</u>                 |
| 16 |                          | clinical/economic        | (A:472, NA:136)              | MPR<90% =              | costs           | TC:\$1657.11 (\$1884.14)                      |
| 17 |                          | outcomes in patients     |                              | nonadherent            |                 | OC: \$1413.99 (\$1608.20),                    |
| 18 |                          | with type II diabetes    |                              | <u>Method of</u>       |                 | HC: \$243.11 (\$276.12)                       |
| 19 |                          | mellitus in the republic |                              | <u>Assessment:</u>     |                 |                                               |
| 20 |                          | of Korea over 3 year     |                              | pharmacy claims        |                 |                                               |
| 21 |                          | period.                  |                              | data                   |                 |                                               |
| 22 |                          |                          |                              |                        |                 |                                               |
| 23 |                          |                          |                              |                        |                 |                                               |
| 24 | <i>Buysman et al[28]</i> | To examine the impact    | <u>Design:</u> Retrospective | <u>Measure:</u> PDC    | Pharmacy        | <u>Type of Costs:</u> unadjusted              |
| 25 | 2017                     | of real world            | database analysis            | <u>Classification:</u> | costs           | <u>Classification:</u> all cause and disease  |
| 26 | US                       | adherence on             | <u>Follow Up:</u> 12 months  | PDC≥80% = highly       |                 | state specific                                |
| 27 |                          | glycaemic control in     | <u>Sample Size:</u> 2261     | adherent,              |                 | <u>Currency Year:</u> USD, 2014               |
| 28 |                          | type 2 diabetes          | (A:1215, NA:1046)            | PDC<80% = less         |                 | <u>Cost of Nonadherence:</u> all cause:       |
| 29 |                          | patients treated with    |                              | than highly            |                 | PC: \$7225 (\$7297.39)                        |
| 30 |                          | canagliflozin.           |                              | adherent               |                 | Disease state specific:                       |
| 31 |                          |                          |                              | <u>Method of</u>       |                 | PC: \$4660 (\$4706.69)                        |
| 32 |                          |                          |                              | <u>Assessment:</u>     |                 |                                               |
| 33 |                          |                          |                              | healthcare claims      |                 |                                               |
| 34 |                          |                          |                              | data                   |                 |                                               |
| 35 |                          |                          |                              |                        |                 |                                               |
| 36 |                          |                          |                              |                        |                 |                                               |
| 37 | <i>Curtis et al[29]</i>  | Examine the              | <u>Design:</u> Retrospective | <u>Measure:</u> PDC    | Total costs     | <u>Type of Costs:</u> adjusted                |
| 38 | 2017                     | association between      | analysis                     | <u>Classification:</u> | Outpatient      | <u>Classification:</u> all cause              |
| 39 | US                       | adherence to glucose     | <u>Follow Up:</u> 3 years    | PDC≥80% =              | costs           | <u>Currency Year:</u> USD, 2014               |
| 40 |                          | lowering agents and      | <u>Sample Size:</u> 228074   | adherent,              | Pharmacy        | <u>Cost of Nonadherence:</u>                  |
| 41 |                          |                          |                              |                        |                 |                                               |
| 42 |                          |                          |                              |                        |                 |                                               |
| 43 |                          |                          |                              |                        |                 |                                               |
| 44 |                          |                          |                              |                        |                 |                                               |
| 45 |                          |                          |                              |                        |                 |                                               |
| 46 |                          |                          |                              |                        |                 |                                               |
| 47 |                          |                          |                              |                        |                 |                                               |

1  
2  
3  
4  
5  
6  
7  
8  
9  
10  
11  
12  
13  
14  
15  
16  
17  
18  
19  
20  
21  
22  
23  
24  
25  
26  
27  
28  
29  
30  
31  
32  
33  
34  
35  
36  
37  
38  
39  
40  
41  
42  
43  
44  
45  
46  
47

patient outcomes in an adult type 2 diabetes population

(A:117864, NA:110210)

PDC<80% = nonadherent  
Method of Assessment: healthcare claims data

costs  
Acute care costs

TC:\$38633 (\$39020.09)  
OC: \$16964 (\$17134),  
PC: \$9390 (\$9484.08),  
ACC:\$12153 (\$12274.77)

Egede et al[30] 2012 US

To examine the longitudinal effects of medication nonadherence on key costs and estimate potential savings from increased adherence using novel methodology that accounts for shared correlation among cost categories.

Design: Retrospective cohort study  
Follow Up: 5 years  
Sample Size: 740195 (A:427390, NA:312805)

Measure: MPR  
Classification: MPR≥80% = adherent, MPR<80% = nonadherent  
Method of Assessment: pharmacy claims data

Inpatient costs  
Outpatient costs  
Pharmacy costs

Type of Costs: unadjusted  
Classification: disease state specific  
Currency Year: USD, 2006  
Cost of Nonadherence\*: IC:\$14515.24 (\$17886.40)  
OC: \$3599.27 (\$4434.16),  
PC: \$1073.12 (\$1322.42)

Quality: high  
Classification: cost outcome description

Gentil et al[31] 2015 Canada

To examine healthcare costs associated with adherence to oral antihyperglycemic agents and the effects of depression and anxiety disorders on these in older adults with type 2 diabetes

Design: Retrospective, observational cohort analysis  
Follow Up: 1 year  
Sample Size: 301 (A:224, NA:77)

Measure: MPR  
Classification: MPR≥80% = adherent, MPR<80% = nonadherent  
Method of Assessment: pharmacy claims data

Total costs  
Inpatient costs  
Outpatient costs  
Pharmacy costs  
Physician office visit costs

Type of Costs: adjusted and unadjusted  
Classification: all cause and disease state specific  
Currency Year: CAD, 2010  
Cost of Nonadherence:  
Adjusted all cause:  
TC:\$11124 (\$9818.67),  
IC:\$7419 (\$6548.43)  
OC: \$2687 (\$2371.70),  
PC: \$504 (\$444.86),  
POC:\$513 (\$452.80)  
Adjusted disease state specific:  
TC:\$4477 (\$3951.65),  
IC:\$2836 (\$2503.21)  
OC: \$1518 (\$1339.87),

Quality: medium  
Classification: cost description

1  
2  
3  
4  
5  
6  
7  
8  
9  
10  
11  
12  
13  
14  
15  
16  
17  
18  
19  
20  
21  
22  
23  
24  
25  
26  
27  
28  
29  
30  
31  
32  
33  
34  
35  
36  
37  
38  
39  
40  
41  
42  
43  
44  
45  
46  
47

For peer review only

|                               |                                                                                                                            |                                                                                                                                       |                                                                                                                                                         |                                                                                    |                                                                                                                                                                                                                                                                                                                                                                                                                                                                                                                                                              |                                                                   |
|-------------------------------|----------------------------------------------------------------------------------------------------------------------------|---------------------------------------------------------------------------------------------------------------------------------------|---------------------------------------------------------------------------------------------------------------------------------------------------------|------------------------------------------------------------------------------------|--------------------------------------------------------------------------------------------------------------------------------------------------------------------------------------------------------------------------------------------------------------------------------------------------------------------------------------------------------------------------------------------------------------------------------------------------------------------------------------------------------------------------------------------------------------|-------------------------------------------------------------------|
|                               |                                                                                                                            |                                                                                                                                       |                                                                                                                                                         |                                                                                    | PC###: \$-444 (\$-391.90),<br>POC:\$568 (\$517.24)<br>Unadjusted all cause:<br>TC:\$14979 (\$13221.30),<br>IC:\$6351 (\$5605.75)<br>OC: \$4058 (\$3581.82),<br>PC: \$3503 (\$3091.94),<br>POC:\$1066 (\$940.91)<br>Unadjusted disease state specific:<br>TC:\$9008 (\$7950.97),<br>IC:\$2854 (\$2519.10)<br>OC: \$2654 (\$2342.57),<br>PC: \$2498 (\$2204.87),<br>POC:\$1002 (\$884.42)                                                                                                                                                                      |                                                                   |
| Hagen et al[32]<br>2014<br>US | To evaluate the relationships between compliance with oral hypoglycemic agents and healthcare/ short term disability costs | <u>Design:</u> Retrospective, observational cohort analysis<br><u>Follow Up:</u> 1 year<br><u>Sample Size:</u> 4978 (A:2820, NA:2158) | <u>Measure:</u> PDC<br><u>Classification:</u><br>PDC≥80% = compliant,<br>PDC<80% = noncompliant<br><u>Method of Assessment:</u><br>pharmacy claims data | Healthcare costs<br>Pharmacy costs<br>Medical costs<br>Short term disability costs | <u>Type of Costs:</u> adjusted and unadjusted<br><u>Classification:</u> all cause and disease state specific<br><u>Currency Year:</u> USD, 2003<br><u>Cost of Nonadherence:</u> Adjusted all cause:<br>PC: \$1668 (\$2065.99),<br>Adjusted disease state specific:<br>HC:\$7642 (\$9465.39), PC:\$614 (\$760.50), MC:\$5974 (\$7399.40),<br>STDC:\$1840 (\$2279.03)<br>Unadjusted all cause:<br>PC:\$1727 (\$2139.06)<br>Unadjusted disease state specific:<br>HC:\$6919 (\$8569.88), PC:\$785 (\$972.30), MC:\$5192 (\$6430.82),<br>STDC:\$1717 (\$2126.68) | <u>Quality:</u> medium<br><u>Classification:</u> cost description |
| Hansen et al[33]<br>2010      | To compare all cause total health care costs                                                                               | <u>Design:</u> Retrospective, cohort study                                                                                            | <u>Measure:</u> MPR<br><u>Classification:</u>                                                                                                           | Total Healthcare                                                                   | <u>Type of Costs:</u> adjusted and unadjusted<br><u>Classification:</u> all cause and disease                                                                                                                                                                                                                                                                                                                                                                                                                                                                | <u>Quality:</u> medium<br><u>Classification:</u> cost             |

1  
2  
3  
4  
5  
6  
7  
8  
9  
10  
11  
12  
13  
14  
15  
16  
17  
18  
19  
20  
21  
22  
23  
24  
25  
26  
27  
28  
29  
30  
31  
32  
33  
34  
35  
36  
37  
38  
39  
40  
41  
42  
43  
44  
45  
46  
47

|                                            |                                                                                                                                                                                                                                                                      |                                                                                                                                            |                                                                                                                                                                    |                                                                |                                                                                                                                                                                                                                                                                                                                                                                                                                                                                |                                                                         |
|--------------------------------------------|----------------------------------------------------------------------------------------------------------------------------------------------------------------------------------------------------------------------------------------------------------------------|--------------------------------------------------------------------------------------------------------------------------------------------|--------------------------------------------------------------------------------------------------------------------------------------------------------------------|----------------------------------------------------------------|--------------------------------------------------------------------------------------------------------------------------------------------------------------------------------------------------------------------------------------------------------------------------------------------------------------------------------------------------------------------------------------------------------------------------------------------------------------------------------|-------------------------------------------------------------------------|
| US                                         | and diabetes mellitus specific health care costs between patients who were adherent or non-adherent to monotherapy with metformin, pioglitazone or a sulfonylurea and to examine whether cost differences varied among patients using these oral antidiabetic drugs. | <u>Follow Up:</u> 2 years<br><u>Sample Size:</u> 108592 (A:63830, NA:44762)                                                                | <u>MPR</u> ≥80% = adherent,<br><u>MPR</u> <80% = nonadherent<br><u>Method of Assessment:</u> pharmacy claims data                                                  | costs<br>Inpatient costs<br>Outpatient costs<br>Pharmacy costs | state specific<br><u>Currency Year:</u> USD, 2005<br><u>Cost of Nonadherence#:</u> Adjusted all cause:<br>THC:\$13258 (\$15911.01)<br>Adjusted disease state specific:<br>THC:\$2284 (\$2741.04)<br>Unadjusted all cause:<br>THC:\$15448.50 (\$18539.90),<br>IC:\$4242.33 (\$5091.25),<br>OC:\$ 7377.83, PC:\$3828 (\$4594.01)<br>Unadjusted disease state specific:<br>THC:\$3232.33 (\$3879.15), IC:\$873.50 (\$1048.29), OC:\$1545.67(\$1854.96),<br>PC:\$812.67 (\$975.29) | description                                                             |
| <i>Hong et al</i> [34] 2011<br>South Korea | To assess the relationship between initial adherence to oral antihyperglycemic medications and subsequent health outcomes.                                                                                                                                           | <u>Design:</u> Retrospective, cohort study<br><u>Follow Up:</u> 3 years<br><u>Sample Size:</u> 40082 (A:11800, NA:28282)                   | <u>Measure:</u> MPR<br><u>Classification:</u><br><u>MPR</u> ≥80% = adherent,<br><u>MPR</u> <80% = nonadherent<br><u>Method of Assessment:</u> pharmacy claims data | Total costs<br>Hospitalization costs                           | <u>Type of Costs:</u> unadjusted<br><u>Classification:</u> disease state specific<br><u>Currency Year:</u> KRW, 2007<br><u>Cost of Nonadherence:</u><br>TC:₩765453 (\$1142.31),<br>HC:₩397549 (\$593.28)                                                                                                                                                                                                                                                                       | <u>Quality:</u> medium<br><u>Classification:</u> cost description       |
| <i>Jha et al</i> [35] 2012<br>US           | How often do previously non-adherent patients become adherent and vice versa? Are changes in adherence associated with increased or                                                                                                                                  | <u>Design:</u> Retrospective, observational claims analysis<br><u>Follow Up:</u> unclear<br><u>Sample Size:</u> 135639 (A:99976, NA:36553) | <u>Measure:</u> MPR<br><u>Classification:</u><br><u>MPR</u> ≥80% = adherent,<br><u>MPR</u> <80% = nonadherent<br><u>Method of Assessment:</u>                      | Total costs<br>ED costs<br>Hospitalization costs               | <u>Type of Costs:</u> adjusted<br><u>Classification:</u> disease state specific<br><u>Currency Year:</u> USD, 2011<br><u>Cost of Nonadherence***:</u><br>TC:\$4680000000 (\$5006563305.49),<br>EDC:\$735000000 (\$786287185.80),<br>HC:\$3950000000 (\$4225625012.11)                                                                                                                                                                                                          | <u>Quality:</u> high<br><u>Classification:</u> cost outcome description |

decreased pharmacy claims  
hospitalizations or data  
emergency  
department visits?

Are there certain  
subgroups of  
populations that seem  
to benefit more than  
others when they  
adhere to their  
medication?  
What are the financial  
implications of changes  
in adherence for the  
nation at large and for  
Medicare?

White et al[36]  
2004  
US

To assess the  
relationship between  
diabetic medication  
adherence, total  
healthcare costs and  
utilisation with  
patients with type 2  
diabetes mellitus and  
concomitant diabetes  
and cardiovascular  
disease.

Design: Retrospective,  
database analysis  
Follow Up: 1 year  
Sample Size: 67029  
(>95:20170, 75-95:  
14074, <75:16713)

Measure: MPR  
Classification:  
MPR≥95%,  
MPR>75%<95%,  
MPR<75%  
Method of  
Assessment:  
pharmacy claims  
data

Total costs  
Pharmacy  
costs  
Non-pharmacy  
costs

Type of Costs: adjusted and unadjusted  
Classification: disease state specific  
Currency Year: USD, 2000  
Cost of Nonadherence: adjusted:  
TC(≥95):\$4835 (\$6518.17),  
TC(75-95):\$5314 (\$7163.92),  
TC(<75):\$5706 (\$7692.38),  
PC(≥95):\$1429 (\$1926.47),  
PC(75-95):\$1157 (\$1559.78),  
PC(<75):\$762 (\$1027.27),  
NPC(≥95):\$3406 (\$4591.70),  
NPC(75-95):\$4157 (\$5604.14),  
NPC(<75):\$4944 (\$6665.11)  
Unadjusted:  
TC(≥95):\$4809 (\$6483.12),  
TC(75-95):\$5333 (\$7189.53),  
TC(<75):\$5605 (\$7556.22),

Quality: low  
Classification: cost  
analysis

1  
2  
3  
4  
5  
6  
7  
8  
9  
10 *Wu et al*[37]  
11 2009  
12 US

To examine the predictors of duloxetine compliance and its association with healthcare costs among diabetic peripheral neuropathic pain (DPNP) patients.

Design: Retrospective, cohort study  
Follow Up: 1 year  
Sample Size: 2354 (A:830, NA:1524)

Measure: MPR  
Classification: MPR $\geq$ 80%= high compliance, MPR<80% = low compliance  
Subgroup Analysis: commercial and Medicare supplemental  
Method of Assessment: pharmacy claims data

Total healthcare costs  
Inpatient costs  
Outpatient costs  
Pharmacy costs

PC( $\geq$ 95):\$1402 (\$1890.07),  
PC(75-95):\$1153 (\$1554.38),  
PC(<75):\$766 (\$1032.66),  
NPC( $\geq$ 95):\$3407 (\$4593.05),  
NPC(75-95):\$4180 (\$5635.15),  
NPC(<75):\$4839 (\$6523.56)  
Type of Costs: adjusted  
Classification: all cause and disease state specific  
Currency Year: USD, 2006  
Cost of Nonadherence: adjusted all cause:  
THC(com):\$32407 (\$37732.29),  
THC(med):\$24622 (\$28668.02),  
IC(com):\$ 12851(\$14692.74),  
IC(med):\$ 6754 (\$7863.85),  
OC(com):\$11888 (\$13841.50),  
OC(med):\$10598 (\$12339.52),  
PC(com):\$7667 (\$8926.88),  
PC(med):\$7270 (\$8464.65)  
Adjusted disease state specific:  
Diabetes:  
THC(com):\$10024 (\$11671.20),  
THC(med):\$5015 (\$5839.09),  
IC(com):\$2232 (\$2598.77),  
IC(med):\$2606 (\$3034.23),  
OC(com):\$1989 (\$2315.84),  
OC(med):\$1231 (\$1433.28),  
PC(com):\$1451 (\$1689.44),  
PC(med):\$1179 (\$1372.74)  
DPNP:  
THC(com):\$3565 (\$4150.82),  
THC(med):\$2384 (\$2775.75),

Quality: medium  
Classification: cost description

**Osteoporosis**

*Briesacher et al*[38]  
2007  
US

To assess rates of osteoporotic fractures and health care utilisation as a function of bisphosphonate compliance in usual clinical practice.

Design: Retrospective, cohort study  
Follow Up: 3 years  
Sample Size: 17988 (not specified)

Measure: MPR  
Classification: 80-100% = adherent, 60-79% = moderate adherence, 40-59% = moderate adherence, 20-39% = nonadherent, 0-19% = nonadherent  
Method of Assessment: pharmacy claims data

Total costs  
Inpatient costs  
Outpatient costs  
Pharmacy costs

IC(com):\$1739 (\$2024.76),  
IC(med):\$1048 (\$1220.21),  
OC(com):\$362 (\$421.49),  
OC(med):\$181 (\$210.74),  
PC(com):\$1464 (\$1704.57)  
PC(med):\$1155 (\$1344.80)

Type of Costs: adjusted and unadjusted  
Classification: disease state specific  
Currency Year: USD, 2004  
Cost of Nonadherence\*\*\*\*: adjusted:  
TC(80-100):-\$859 (-\$1063.96),  
TC(60-79):-\$474 (-\$587.10),  
TC(40-59):-\$366 (-\$453.33),  
TC(20-39):\$151 (\$187.03),  
IC(80-100):-\$3233 (-\$4004.40),  
IC(60-79):-\$856(-\$1060.24),  
IC(40-59):-\$6221 (-\$7705.34),  
IC(20-39):-\$585 (-\$724.58),  
OC(80-100):-\$445 (-\$551.18),  
OC(60-79):-\$538 (-\$666.37),  
OC(40-59):-\$236 (-\$292.31),  
OC(20-39):\$60 (\$74.32),  
PC(80-100):\$997 (\$1234.89),  
PC(60-79):\$923 (\$1143.23),  
PC(40-59):\$402 (\$497.92),  
PC(20-39):\$160(\$198.18)  
Unadjusted:  
TC(80-100):-\$1273 (-\$1576.74),  
TC(60-79):-\$294 (-\$364.15),  
TC(40-59):-\$573 (-\$709.72),  
TC(20-39):\$101 (\$125.10),  
IC(80-100):-\$883 (-\$1093.68),

Quality: medium  
Classification: cost description



1  
2  
3  
4  
5  
6  
7  
8  
9  
10  
11  
12  
13  
14  
15  
16  
17  
18  
19  
20  
21  
22  
23  
24  
25  
26  
27  
28  
29  
30  
31  
32  
33  
34  
35  
36  
37  
38  
39  
40  
41  
42  
43  
44  
45  
46  
47

|                                           |                                                                                                                                              |                                                                                                                         |                                                                                                                                           |                                                                                                                  |                                                                                                                                                                                                                                                                                                                                                                                                                                                                                                            |                                                                           |
|-------------------------------------------|----------------------------------------------------------------------------------------------------------------------------------------------|-------------------------------------------------------------------------------------------------------------------------|-------------------------------------------------------------------------------------------------------------------------------------------|------------------------------------------------------------------------------------------------------------------|------------------------------------------------------------------------------------------------------------------------------------------------------------------------------------------------------------------------------------------------------------------------------------------------------------------------------------------------------------------------------------------------------------------------------------------------------------------------------------------------------------|---------------------------------------------------------------------------|
|                                           |                                                                                                                                              |                                                                                                                         |                                                                                                                                           |                                                                                                                  | IC(60-79):-\$384 (-\$475.62),<br>IC(40-59):-\$597 (-\$739.44),<br>IC(20-39):-\$93 (-\$115.19),<br>OC(80-100):-\$774 (-\$958.68),<br>OC(60-79):-\$193 (-\$239.05),<br>OC(40-59):-\$145 (-\$179.60),<br>OC(20-39):\$148 (\$183.31),<br>PC(80-100):\$384 (\$475.62),<br>PC(60-79):\$284 (\$351.76),<br>PC(40-59):\$170 (\$210.56),<br>PC(20-39):\$48 (\$59.45)                                                                                                                                                |                                                                           |
| <i>Eisenberg et al</i> [39]<br>2015<br>US | To determine healthcare outcomes associated with compliance and noncompliance to bisphosphonate therapy in women diagnosed with osteoporosis | <u>Design:</u> Retrospective claims study<br><u>Follow Up:</u> 2 years<br><u>Sample Size:</u> 27905 (A:11368, NA:16537) | <u>Measure:</u> MPR<br><u>Classification:</u> (≥70% = compliant, <70% = noncompliant<br><u>Method of Assessment:</u> pharmacy claims data | Total costs<br>Inpatient costs<br>Outpatient costs<br>ED costs<br>Pharmacy costs<br>Physician office visit costs | <u>Type of Costs:</u> unadjusted<br><u>Classification:</u> all cause and disease state specific<br><u>Currency Year:</u> USD, 2012<br><u>Cost of Nonadherence:</u> all cause:<br>TC:\$7237 (\$7550.72),<br>IC:\$1986 (\$2072.09),<br>OC:\$2057 (\$2146.17),<br>EDC:\$258 (\$269.18),<br>PC:\$2197 (\$2292.24),<br>POC:\$738 (\$769.99)<br>Disease state specific:<br>TC:\$674 (\$703.22),<br>IC:\$334 (\$348.48),<br>OC:\$77 (\$80.34),<br>EDC:\$5 (\$5.22),<br>PC:\$213 (\$222.23),<br>POC:\$44 (\$45.91) | <u>Quality:</u> medium<br><u>Classification:</u> cost description         |
| <i>Halpern et al</i> [40]<br>2011<br>US   | To examine the associations of adherence to osteoporosis therapies                                                                           | <u>Design:</u> Retrospective analysis<br><u>Follow Up:</u> 540 days<br><u>Sample Size:</u> 21655                        | <u>Measure:</u> MPR<br><u>Classification:</u> (≥80% = high adherence,                                                                     | Medical costs                                                                                                    | <u>Type of Costs:</u> unadjusted<br><u>Classification:</u> all cause<br><u>Currency Year:</u> USD, 2006<br><u>Cost of Nonadherence:</u> commercial:                                                                                                                                                                                                                                                                                                                                                        | <u>Quality:</u> medium<br><u>Classification:</u> cost outcome description |

with occurrence of closed fracture, all cause medical costs and all cause hospitalizations.

(≥80%:8759, ≥50<80%:5237, <50%:7659)

≥50<80% = moderate adherence, <50% = low adherence  
Method of Assessment:  
 pharmacy claims data

MC(≥80):\$4295 (\$5000.78), MC(50-80):\$4697 (\$5468.84), MC(<50):\$5596 (\$6515.56)  
 Medicare:  
 MC(≥80):\$4590 (\$5344.25), MC(50-80):\$5536 (\$6445.71), MC(<50):\$5801 (\$6754.25)

Hazel-Fernandez et al[41]  
 2013  
 US

To evaluate the healthcare utilisation patterns of medicare part D beneficiaries newly initiating teriparatide and to assess the association of medication adherence and persistence with bone fracture.

Design: Retrospective cohort study  
Follow Up: 12 months  
Sample Size: 761  
 (≥80%:163, ≥50<80%:57, <50%:541)

Measure: PDC  
Classification:  
 (≥80% = high adherence, ≥50<80% = moderate adherence, <50% = low adherence  
Method of Assessment:  
 pharmacy claims data

Total healthcare costs  
 Inpatient costs  
 Outpatient costs  
 ED costs  
 Pharmacy costs

Type of Costs: unadjusted  
Classification: disease state specific and fracture related  
Currency Year: USD, 2010  
Cost of Nonadherence\*:  
 Disease state specific:  
 THC(≥80):\$21033 (\$22942.39), THC(50-80):\$25574 (\$27895.62), THC(<50):\$15528 (\$16937.64), IC(≥80):\$2198 (\$2397.54), IC(50-80):\$8448 (\$9214.91), IC(<50):\$4897 (\$5341.55), OC(≥80):\$5151 (\$5618.61), OC(50-80):\$6439 (\$7023.54), OC(<50):\$5806 (\$6333.07), EDC(≥80):\$211 (\$230.15), EDC(50-80):\$330 (\$359.96), EDC(<50):\$465 (\$507.21), PC(≥80):\$13472 (\$14695), PC(50-80):\$10358 (\$11298.31), PC(<50):\$4361 (\$4756.89)  
 Fracture related:  
 THC(≥80):\$12670 (\$13820.19), THC(50-80):\$9292 (\$10135.53), THC(<50):\$4419 (\$4820.16),

Quality: medium  
Classification: cost outcome description

|    |                              |                                                                                                                                                                   |                                                                                                                        |                                                                                                                                                   |                                                     |                                                                                                                                                                                                                                                                                          |                                                                         |
|----|------------------------------|-------------------------------------------------------------------------------------------------------------------------------------------------------------------|------------------------------------------------------------------------------------------------------------------------|---------------------------------------------------------------------------------------------------------------------------------------------------|-----------------------------------------------------|------------------------------------------------------------------------------------------------------------------------------------------------------------------------------------------------------------------------------------------------------------------------------------------|-------------------------------------------------------------------------|
| 1  |                              |                                                                                                                                                                   |                                                                                                                        |                                                                                                                                                   |                                                     |                                                                                                                                                                                                                                                                                          |                                                                         |
| 2  |                              |                                                                                                                                                                   |                                                                                                                        |                                                                                                                                                   |                                                     |                                                                                                                                                                                                                                                                                          |                                                                         |
| 3  |                              |                                                                                                                                                                   |                                                                                                                        |                                                                                                                                                   |                                                     |                                                                                                                                                                                                                                                                                          |                                                                         |
| 4  |                              |                                                                                                                                                                   |                                                                                                                        |                                                                                                                                                   |                                                     | IC( $\geq$ 80):\$366 (\$399.23),                                                                                                                                                                                                                                                         |                                                                         |
| 5  |                              |                                                                                                                                                                   |                                                                                                                        |                                                                                                                                                   |                                                     | IC(50-80):\$830 (\$905.35),                                                                                                                                                                                                                                                              |                                                                         |
| 6  |                              |                                                                                                                                                                   |                                                                                                                        |                                                                                                                                                   |                                                     | IC(<50):\$1325 (\$1445.28),                                                                                                                                                                                                                                                              |                                                                         |
| 7  |                              |                                                                                                                                                                   |                                                                                                                        |                                                                                                                                                   |                                                     | OC( $\geq$ 80):\$1048 (\$1143.14),                                                                                                                                                                                                                                                       |                                                                         |
| 8  |                              |                                                                                                                                                                   |                                                                                                                        |                                                                                                                                                   |                                                     | OC(50-80):\$955 (\$1041.70),                                                                                                                                                                                                                                                             |                                                                         |
| 9  |                              |                                                                                                                                                                   |                                                                                                                        |                                                                                                                                                   |                                                     | OC(<50):\$767 (\$836.63),                                                                                                                                                                                                                                                                |                                                                         |
| 10 |                              |                                                                                                                                                                   |                                                                                                                        |                                                                                                                                                   |                                                     | EDC( $\geq$ 80):\$6 (\$6.54),                                                                                                                                                                                                                                                            |                                                                         |
| 11 |                              |                                                                                                                                                                   |                                                                                                                        |                                                                                                                                                   |                                                     | EDC(50-80):\$9 (\$9.82),                                                                                                                                                                                                                                                                 |                                                                         |
| 12 |                              |                                                                                                                                                                   |                                                                                                                        |                                                                                                                                                   |                                                     | EDC(<50):\$44 (\$47.99),                                                                                                                                                                                                                                                                 |                                                                         |
| 13 |                              |                                                                                                                                                                   |                                                                                                                        |                                                                                                                                                   |                                                     | PC( $\geq$ 80):\$10810 (\$11791.34),                                                                                                                                                                                                                                                     |                                                                         |
| 14 |                              |                                                                                                                                                                   |                                                                                                                        |                                                                                                                                                   |                                                     | PC(50-80):\$7420 (\$8093.59),                                                                                                                                                                                                                                                            |                                                                         |
| 15 |                              |                                                                                                                                                                   |                                                                                                                        |                                                                                                                                                   |                                                     | PC(<50):\$2068 (\$2255.73)                                                                                                                                                                                                                                                               |                                                                         |
| 16 |                              |                                                                                                                                                                   |                                                                                                                        |                                                                                                                                                   |                                                     |                                                                                                                                                                                                                                                                                          |                                                                         |
| 17 | <i>Huybrechts et al</i> [42] | To evaluate non-compliance with osteoporosis medications as well as its implications for health and economic outcomes in actual practice.                         | <u>Design:</u> Retrospective cohort study<br><u>Follow Up:</u> 5 years<br><u>Sample Size:</u> 38120 (A:9530, NA:28590) | <u>Measure:</u> MPR<br><u>Classification:</u> ( $\geq$ 80% = compliant, <50% = noncompliant)<br><u>Method of Assessment:</u> pharmacy claims data | Total costs<br>Medical costs<br>Institutional costs | <u>Type of Costs:</u> unadjusted<br><u>Classification:</u> disease state specific<br><u>Currency Year:</u> USD, 2000<br><u>Cost of Nonadherence:</u> TC:\$7200 (\$9706.44), MC:\$1476 (\$1989.84), InstC:\$5736 (\$7732.80)                                                              | <u>Quality:</u> low<br><u>Classification:</u> cost description          |
| 18 | 2006                         |                                                                                                                                                                   |                                                                                                                        |                                                                                                                                                   |                                                     |                                                                                                                                                                                                                                                                                          |                                                                         |
| 19 | US                           |                                                                                                                                                                   |                                                                                                                        |                                                                                                                                                   |                                                     |                                                                                                                                                                                                                                                                                          |                                                                         |
| 20 |                              |                                                                                                                                                                   |                                                                                                                        |                                                                                                                                                   |                                                     |                                                                                                                                                                                                                                                                                          |                                                                         |
| 21 |                              |                                                                                                                                                                   |                                                                                                                        |                                                                                                                                                   |                                                     |                                                                                                                                                                                                                                                                                          |                                                                         |
| 22 |                              |                                                                                                                                                                   |                                                                                                                        |                                                                                                                                                   |                                                     |                                                                                                                                                                                                                                                                                          |                                                                         |
| 23 |                              |                                                                                                                                                                   |                                                                                                                        |                                                                                                                                                   |                                                     |                                                                                                                                                                                                                                                                                          |                                                                         |
| 24 |                              |                                                                                                                                                                   |                                                                                                                        |                                                                                                                                                   |                                                     |                                                                                                                                                                                                                                                                                          |                                                                         |
| 25 |                              |                                                                                                                                                                   |                                                                                                                        |                                                                                                                                                   |                                                     |                                                                                                                                                                                                                                                                                          |                                                                         |
| 26 |                              |                                                                                                                                                                   |                                                                                                                        |                                                                                                                                                   |                                                     |                                                                                                                                                                                                                                                                                          |                                                                         |
| 27 | <i>Kjellberge al</i> [43]    | To estimate the rate of oral bisphosphonate compliance among Danish women and to examine the association of noncompliance with health care resource use and cost. | <u>Design:</u> Retrospective cohort study<br><u>Follow Up:</u> 1 year<br><u>Sample Size:</u> 38234 (A:26806, NA:11428) | <u>Measure:</u> MPR<br><u>Classification:</u> ( $\geq$ 70% = compliant, <70% = noncompliant)<br><u>Method of Assessment:</u> pharmacy claims data | Total costs<br>Medical costs                        | <u>Type of Costs:</u> adjusted<br><u>Classification:</u> all cause and disease state specific<br><u>Currency Year:</u> Euro, 2011<br><u>Cost of Nonadherence:</u> all cause: TC:€4933 (\$6209.58), MC:€3471 (\$4369.20), Disease state specific: TC:€754 (\$949.12), MC:€426 (\$536.24), | <u>Quality:</u> high<br><u>Classification:</u> cost outcome description |
| 28 | 2016                         |                                                                                                                                                                   |                                                                                                                        |                                                                                                                                                   |                                                     |                                                                                                                                                                                                                                                                                          |                                                                         |
| 29 | Denmark                      |                                                                                                                                                                   |                                                                                                                        |                                                                                                                                                   |                                                     |                                                                                                                                                                                                                                                                                          |                                                                         |
| 30 |                              |                                                                                                                                                                   |                                                                                                                        |                                                                                                                                                   |                                                     |                                                                                                                                                                                                                                                                                          |                                                                         |
| 31 |                              |                                                                                                                                                                   |                                                                                                                        |                                                                                                                                                   |                                                     |                                                                                                                                                                                                                                                                                          |                                                                         |
| 32 |                              |                                                                                                                                                                   |                                                                                                                        |                                                                                                                                                   |                                                     |                                                                                                                                                                                                                                                                                          |                                                                         |
| 33 |                              |                                                                                                                                                                   |                                                                                                                        |                                                                                                                                                   |                                                     |                                                                                                                                                                                                                                                                                          |                                                                         |
| 34 |                              |                                                                                                                                                                   |                                                                                                                        |                                                                                                                                                   |                                                     |                                                                                                                                                                                                                                                                                          |                                                                         |
| 35 |                              |                                                                                                                                                                   |                                                                                                                        |                                                                                                                                                   |                                                     |                                                                                                                                                                                                                                                                                          |                                                                         |
| 36 |                              |                                                                                                                                                                   |                                                                                                                        |                                                                                                                                                   |                                                     |                                                                                                                                                                                                                                                                                          |                                                                         |
| 37 |                              |                                                                                                                                                                   |                                                                                                                        |                                                                                                                                                   |                                                     |                                                                                                                                                                                                                                                                                          |                                                                         |
| 38 |                              |                                                                                                                                                                   |                                                                                                                        |                                                                                                                                                   |                                                     |                                                                                                                                                                                                                                                                                          |                                                                         |
| 39 | <i>Modi et al</i> [44]       | To evaluate compliance with                                                                                                                                       | <u>Design:</u> Retrospective cohort study                                                                              | <u>Measure:</u> MPR<br><u>Classification:</u>                                                                                                     | Total costs<br>Inpatient costs                      | <u>Type of Costs:</u> unadjusted<br><u>Classification:</u> all cause and disease                                                                                                                                                                                                         | <u>Quality:</u> medium<br><u>Classification:</u> cost                   |
| 40 | 2015                         |                                                                                                                                                                   |                                                                                                                        |                                                                                                                                                   |                                                     |                                                                                                                                                                                                                                                                                          |                                                                         |
| 41 |                              |                                                                                                                                                                   |                                                                                                                        |                                                                                                                                                   |                                                     |                                                                                                                                                                                                                                                                                          |                                                                         |
| 42 |                              |                                                                                                                                                                   |                                                                                                                        |                                                                                                                                                   |                                                     |                                                                                                                                                                                                                                                                                          |                                                                         |
| 43 |                              |                                                                                                                                                                   |                                                                                                                        |                                                                                                                                                   |                                                     |                                                                                                                                                                                                                                                                                          |                                                                         |
| 44 |                              |                                                                                                                                                                   |                                                                                                                        |                                                                                                                                                   |                                                     |                                                                                                                                                                                                                                                                                          |                                                                         |
| 45 |                              |                                                                                                                                                                   |                                                                                                                        |                                                                                                                                                   |                                                     |                                                                                                                                                                                                                                                                                          |                                                                         |
| 46 |                              |                                                                                                                                                                   |                                                                                                                        |                                                                                                                                                   |                                                     |                                                                                                                                                                                                                                                                                          |                                                                         |
| 47 |                              |                                                                                                                                                                   |                                                                                                                        |                                                                                                                                                   |                                                     |                                                                                                                                                                                                                                                                                          |                                                                         |

|    |                         |                        |                              |                        |                |                                               |
|----|-------------------------|------------------------|------------------------------|------------------------|----------------|-----------------------------------------------|
| 1  |                         |                        |                              |                        |                |                                               |
| 2  |                         |                        |                              |                        |                |                                               |
| 3  | US                      | osteoporosis           | <u>Follow Up:</u> 1 year     | (≥80% =                | Outpatient     | state specific                                |
| 4  |                         | treatments and         | <u>Sample Size:</u> 27913    | compliant, <80%        | costs          | <u>Currency Year:</u> USD, 2011               |
| 5  |                         | determine fracture and | (A:23430, NA:34483)          | = noncompliant)        | ED costs       | <u>Cost of Nonadherence:</u> all cause:       |
| 6  |                         | healthcare burden      |                              | <u>Method of</u>       | Pharmacy       | TC:\$11749 (\$12484.12),                      |
| 7  |                         | associated with        |                              | <u>Assessment:</u>     | costs          | IC:\$8768 (\$9316.60),                        |
| 8  |                         | noncompliance          |                              | healthcare claims      | Medical costs  | OC:\$3945 (\$4191.83),                        |
| 9  |                         |                        |                              | data                   | Other costs    | EDC:\$104 (\$110.51),                         |
| 10 |                         |                        |                              |                        |                | PC:\$2981 (\$3167.52),                        |
| 11 |                         |                        |                              |                        |                | MC:\$8768 (\$9316.60),                        |
| 12 |                         |                        |                              |                        |                | OtC:\$997 (\$1059.38)                         |
| 13 |                         |                        |                              |                        |                | Disease state specific:                       |
| 14 |                         |                        |                              |                        |                | TC:\$630 (\$669.42),                          |
| 15 |                         |                        |                              |                        |                | IC:\$443 (\$470.72),                          |
| 16 |                         |                        |                              |                        |                | OC:\$158 (\$167.89),                          |
| 17 |                         |                        |                              |                        |                | EDC:\$3 (\$3.19),                             |
| 18 |                         |                        |                              |                        |                | PC:\$325 (\$345.33),                          |
| 19 |                         |                        |                              |                        |                | OtC:\$26 (\$27.63)                            |
| 20 |                         |                        |                              |                        |                |                                               |
| 21 |                         |                        |                              |                        |                |                                               |
| 22 |                         |                        |                              |                        |                |                                               |
| 23 | <i>Olsen et al</i> [45] | To assess the          | <u>Design:</u> Retrospective | <u>Measure:</u> MPR    | Fracture costs | <u>Type of Costs:</u> unadjusted              |
| 24 | 2013                    | association between    | observational study          | <u>Classification:</u> |                | <u>Classification:</u> fracture site specific |
| 25 | Denmark                 | refill compliance and  | <u>Follow Up:</u> 2 years    | (≥80% = optimal        |                | <u>Currency Year:</u> DKK, 2010               |
| 26 |                         | all cause health care  | <u>Sample Size:</u> 47176    | compliance,            |                | <u>Cost of Nonadherence:</u>                  |
| 27 |                         | costs.                 | (not specified)              | >50<80% =              |                | Hip fracture:                                 |
| 28 |                         |                        |                              | suboptimal             |                | FC(50-80):kr817575.50 (\$74531.41),           |
| 29 |                         |                        |                              | compliance, <50%       |                | FC(<50):kr4454954 (\$549987.04)               |
| 30 |                         |                        |                              | = low compliance       |                | Spine fracture:                               |
| 31 |                         |                        |                              | <u>Method of</u>       |                | FC(50-80):kr174700 (\$21568.12),              |
| 32 |                         |                        |                              | <u>Assessment:</u>     |                | FC(<50):kr226472 (\$27959.14)                 |
| 33 |                         |                        |                              | pharmacy claims        |                | Humerus fracture:                             |
| 34 |                         |                        |                              | data                   |                | FC(50-80):kr117776.50 (\$14540.12),           |
| 35 |                         |                        |                              |                        |                | FC(<50):kr795217.50 (\$98173.70)              |
| 36 |                         |                        |                              |                        |                | Forearm fracture:                             |
| 37 |                         |                        |                              |                        |                | FC(50-80):-kr463024 (-\$57162.70),            |
| 38 |                         |                        |                              |                        |                | FC(<50):kr45072.50 (\$8665.81)                |
| 39 |                         |                        |                              |                        |                |                                               |
| 40 |                         |                        |                              |                        |                |                                               |
| 41 |                         |                        |                              |                        |                |                                               |
| 42 |                         |                        |                              |                        |                |                                               |
| 43 |                         |                        |                              |                        |                |                                               |
| 44 |                         |                        |                              |                        |                |                                               |
| 45 |                         |                        |                              |                        |                |                                               |
| 46 |                         |                        |                              |                        |                |                                               |
| 47 |                         |                        |                              |                        |                |                                               |

1  
2  
3  
4  
5  
6  
7  
8  
9  
10  
11  
12  
13  
14  
15  
16  
17  
18  
19  
20  
21  
22  
23  
24  
25  
26  
27  
28  
29  
30  
31  
32  
33  
34  
35  
36  
37  
38  
39  
40  
41  
42  
43  
44  
45  
46  
47

|                                                |                                                                                                                                                                                                                                  |                                                                                                                                                 |                                                                                                                                                           |                                                                                                                            |                                                                                                                                                                                                                                                                                                                                                                                                                                                                                                                                                                                                                                                                  |                                                                           |
|------------------------------------------------|----------------------------------------------------------------------------------------------------------------------------------------------------------------------------------------------------------------------------------|-------------------------------------------------------------------------------------------------------------------------------------------------|-----------------------------------------------------------------------------------------------------------------------------------------------------------|----------------------------------------------------------------------------------------------------------------------------|------------------------------------------------------------------------------------------------------------------------------------------------------------------------------------------------------------------------------------------------------------------------------------------------------------------------------------------------------------------------------------------------------------------------------------------------------------------------------------------------------------------------------------------------------------------------------------------------------------------------------------------------------------------|---------------------------------------------------------------------------|
| <p><i>Sunycz et al</i>[46]<br/>2008<br/>US</p> | <p>To examine the relationship between persistence and compliance with bisphosphonate therapy and total and osteoporosis related costs and healthcare resource utilisation in a cohort of female bisphosphonate naïve users.</p> | <p><u>Design:</u> Retrospective observational study<br/><u>Follow Up:</u> 3 years<br/><u>Sample Size:</u> 32944 (A:12186, NA:20758)</p>         | <p><u>Measure:</u> MPR<br/><u>Classification:</u> (≥80% = compliant, &lt;80% = noncompliant)<br/><u>Method of Assessment:</u> pharmacy claims data</p>    | <p>Total healthcare costs<br/>Inpatient costs<br/>Outpatient costs<br/>ED costs<br/>Pharmacy costs<br/>Radiology costs</p> | <p>Other fracture:<br/>FC(50-80):-kr19261.50 (-\$2377.93),<br/>FC(&lt;50):kr684067.50 (\$84451.66)<br/><u>Type of Costs:</u> unadjusted<br/><u>Classification:</u> all cause and disease state specific<br/><u>Currency Year:</u> USD, 2005<br/><u>Cost of Nonadherence:</u><br/>All cause:<br/>THC:\$23660 (\$28394.52),<br/>IC:\$18839 (\$22608.81),<br/>OC:\$10061 (\$12074.27),<br/>EDC:\$832 (\$988.49),<br/>PC:\$6941 (\$8329.94),<br/>RC:\$1079 (\$1294.91)<br/>Disease state specific:<br/>THC:\$1602 (\$1922.57),<br/>IC:\$14074 (\$16890.30),<br/>OC:\$501 (\$601.25),<br/>EDC:\$452 (\$542.45),<br/>PC:\$918 (\$1101.70),<br/>RC:\$184 (\$220.82)</p> | <p><u>Quality:</u> low<br/><u>Classification:</u> cost description</p>    |
| <p><i>Zhao et al</i>[47]<br/>2014<br/>US</p>   | <p>To examine the association between teriparatide adherence and healthcare utilisation and costs among hip fracture patients.</p>                                                                                               | <p><u>Design:</u> Retrospective cohort study<br/><u>Follow Up:</u> 36 months<br/><u>Sample Size:</u> 824 (≥80:362, 50-80%:219, &lt;50%:243)</p> | <p><u>Measure:</u> PDC<br/><u>Classification:</u> (≥80% = high, 50-80% = medium, &lt;50% = low)<br/><u>Method of Assessment:</u> pharmacy claims data</p> | <p>Total healthcare costs<br/>Inpatient costs<br/>Outpatient costs<br/>Pharmacy costs</p>                                  | <p><u>Type of Costs:</u> adjusted and unadjusted<br/><u>Classification:</u> disease state specific<br/><u>Currency Year:</u> USD, 2010<br/><u>Cost of Nonadherence*:</u><br/>Adjusted:<br/>THC(≥80):\$34428 (\$37553.4),<br/>THC(50-80):\$37956 (\$41401.68),<br/>THC(&lt;50):\$31188 (\$34019.28),<br/>IC(≥80):\$7548 (\$8233.20),<br/>IC(50-80):\$11520 (\$1256.80),<br/>IC(&lt;50):\$11556 (\$12605.04),</p>                                                                                                                                                                                                                                                  | <p><u>Quality:</u> medium<br/><u>Classification:</u> cost description</p> |

For peer review

OC(≥80):\$9312 (\$10157.40),  
 OC(50-80):\$12816 (\$13979.40),  
 OC(<50):\$13044 (\$14228.16),  
 PC(≥80):\$18864 (\$20576.52),  
 PC(50-80):\$13116 (\$14306.64),  
 PC(<50):\$7452 (\$8128.44)

Unadjusted:  
 THC(≥80):\$37464 (\$40865.04),  
 THC(50-80):\$35076 (\$38260.20),  
 THC(<50):\$29484 (\$32160.60),  
 IC(≥80):\$7092 (\$7735.80),  
 IC(50-80):\$11100 (\$12107.64),  
 IC(<50):\$10632 (\$11597.16),  
 OC(≥80):\$9900 (\$10798.68),  
 OC(50-80):\$11352 (\$12382.56),  
 OC(<50):\$11988 (\$13076.28),  
 PC(≥80):\$20484 (\$22343.52),  
 PC(50-80):\$12624 (\$13770),  
 PC(<50):\$6864 (\$7487.16)

Type of Costs: adjusted and unadjusted  
Classification: disease state specific  
Currency Year: USD, 2010  
Cost of Nonadherence\*:  
 Adjusted:  
 THC(≥80):\$40212 (\$43862.52),  
 THC(50-80):\$40512 (\$44189.76),  
 THC(<50):\$40128 (\$43770.84),  
 IC(≥80):\$8136 (\$8874.60),  
 IC(50-80):\$12060 (\$13154.76),  
 IC(<50):\$15444 (\$43404.36),  
 OC(≥80):\$12924 (\$14097.24),  
 OC(50-80):\$14928 (\$16283.16),  
 OC(<50):\$17568 (\$19162.80)

25 *Zhao et al*[48]  
 26 2013  
 27 US  
 28  
 29 To examine the  
 30 association between  
 31 teriparatide (TPTD)  
 32 adherence and  
 33 healthcare utilisation  
 34 and costs in real world  
 35 US  
 36 kyphoplasty/vertebroplasty (KV) patients.

Design: Retrospective  
 observational cohort  
 study  
Follow Up: 36 months  
Sample Size: 1568  
 (≥80: 783, 50-80%:  
 382, <50%: 403)

Measure: PDC  
Classification:  
 (≥80% = high, 50-  
 80% = medium,  
 <50% = low)  
Method of  
Assessment:  
 pharmacy claims  
 data

Total  
 healthcare  
 costs  
 Inpatient costs  
 Outpatient  
 costs  
 Pharmacy  
 costs

Quality: medium  
Classification: cost  
 description

1  
2  
3  
4  
5  
6  
7  
8  
9  
10  
11  
12  
13  
14  
15  
16  
17  
18  
19  
20  
21  
22  
23  
24  
25  
26  
27  
28  
29  
30  
31  
32  
33  
34  
35  
36  
37  
38  
39  
40  
41  
42  
43  
44  
45  
46  
47

1  
2  
3  
4  
5  
6  
7  
8  
9  
10  
11  
12  
13  
14  
15  
16  
17  
18  
19  
20  
21  
22  
23  
24  
25  
26  
27  
28  
29  
30  
31  
32  
33  
34  
35  
36  
37  
38  
39  
40  
41  
42  
43  
44  
45  
46  
47**Respiratory  
Disease***Davis et al*[49]  
2017  
US

To assess the association between adherence levels to different inhaled corticosteroid/long acting  $\beta_2$ -adrenergic agonist and COPD exacerbation rates and costs in commercially insured population

Design: Observational cohort study  
Follow Up: 12 months  
Sample Size: 13657 ( $\geq 80\%$ : 1898,  $\geq 50 < 80\%$ : 1971,  $\geq 30 < 50\%$ : 2443,  $< 30\%$  :7345)

Measure: PDC  
Classification: ( $\geq 80$  = adherent,  $\geq 50 < 80\%$  = mildly nonadherent,  $\geq 30 < 50\%$  = moderately nonadherent,  $< 30\%$  highly nonadherent)  
Method of Assessment: commercially insured healthcare claims data

Total costs  
Outpatient costs  
Pharmacy costs  
Hospitalization costs

PC( $\geq 80$ ):\$19392 (\$21152.40),  
PC(50-80):\$13908 (\$15170.52),  
PC( $< 50$ ):\$8700 (\$9843.24)  
Unadjusted:  
THC( $\geq 80$ ):\$42768 (\$46650.48),  
THC(50-80):\$36780 (\$40118.88),  
THC( $< 50$ ):\$39792 (\$43404.36),  
IC( $\geq 80$ ):\$7620 (\$8311.80),  
IC(50-80):\$12228 (\$13338.12),  
IC( $< 50$ ):\$15768 (\$17199.48),  
OC( $\geq 80$ ):\$14580 (\$15903.60),  
OC(50-80):\$12108 (\$13207.20),  
OC( $< 50$ ):\$15324 (\$16715.16),  
PC( $\geq 80$ ):\$20568 (\$22435.20),  
PC(50-80):\$12444 (\$13573.68),  
PC( $< 50$ ):\$8700 (\$9489.84)

Type of Costs: adjusted  
Classification: all cause and disease state specific  
Currency Year: USD, 2014  
Cost of Nonadherence\*:  
All cause:  
TC( $\geq 80$ ):\$22546 (\$22772.24),  
TC(50-80):\$25545 (\$25800.95),  
TC(30-50):\$24303 (\$24546.51),  
TC( $< 30$ ):\$25148 (\$25399.98),  
OC( $\geq 80$ ):\$7816 (\$7894.31),  
OC(50-80):\$8225 (\$8307.41),  
OC(30-50):\$8365 (\$8448.81),  
OC( $< 30$ ):\$8857 (\$8945.74),  
PC( $\geq 80$ ):\$7954 (\$8033.70),

Quality: medium  
Classification: cost description

For peer review

PC(50-80):\$6862 (\$6930.76),  
 PC(30-50):\$5485 (\$5539.96),  
 PC(<30):\$4395 (\$4439.04),  
 HC(≥80):\$6106 (\$6167.51),  
 HC(50-80):\$9391 (\$9485.09),  
 HC(30-50):\$9171 (\$9262.89),  
 HC(<30):\$10849 (\$10957.70)  
 Disease state specific:  
 TC(≥80):\$8075.33 (\$8156.24),  
 TC(50-80):\$7053 (\$7123.67),  
 TC(30-50):\$6623 (\$6689.36),  
 TC(<30):\$5644 (\$5700.55),  
 OC(≥80):\$2194.33 (\$2216.32),  
 OC(50-80):\$1947 (\$1966.51),  
 OC(30-50):\$1997 (\$2017.01),  
 OC(<30):\$2152 (\$2173.56),  
 PC(≥80):\$4464 (\$4508.73),  
 PC(50-80):\$3345 (\$3378.52),  
 PC(30-50):\$2307 (\$2330.12),  
 PC(<30):\$1569 (\$1584.72),  
 HC(≥80):\$1074.67 (\$1085.44),  
 HC(50-80):\$1155 (\$1166.57),  
 HC(30-50):\$1619 (\$1635.22),  
 HC(<30):\$1405 (\$1419.08)

31 *Delea et al*[50]  
 32 2008  
 33 US

To assess the  
 association between  
 adherence with  
 fluticasone  
 propionate/salmeterol  
 combination product in  
 a single inhaler and  
 asthma care utilisation  
 and costs in asthma

Design: Retrospective  
 longitudinal cohort  
 study  
Follow Up: 24 months  
Sample Size: 12907  
 (≥75: 2612, 50-75%:  
 3608, 25-50%: 5035,  
 <25%: 1652)

Measure: MPR  
Classification:  
 (≥75, 50-75%, 25-  
 50%, <25%)  
Method of  
Assessment:  
 pharmacy claims  
 data

Total costs  
 Outpatient  
 costs  
 ED costs  
 Other costs

Type of Costs: unadjusted  
Classification: disease state specific  
Currency Year: USD, 2003  
Cost of Nonadherence \*:  
 TC(≥75):\$1564 (\$1990.27),  
 TC(50-75):\$1128 (\$1435.44),  
 TC(25-50):\$900 (\$1145.30),  
 TC(<25):\$632 (\$804.25),  
 OC(≥75):\$1272 (\$1618.69),

Quality: medium  
Classification: cost  
 description



1  
2  
3  
4  
5  
6  
7  
8  
9  
10  
11  
12  
13  
14  
15  
16  
17  
18  
19  
20  
21  
22  
23  
24  
25  
26  
27  
28  
29  
30  
31  
32  
33  
34  
35  
36  
37  
38  
39  
40  
41  
42  
43  
44  
45  
46  
47

patients in typical US  
clinical practice

OC(50-75):\$852 (\$1084.21),  
OC(25-50):\$600 (\$763.53),  
OC(<25):\$388 (\$493.75),  
EDC(≥75):\$32 (\$40.72),  
EDC(50-75):\$36 (\$45.81),  
EDC(25-50):\$60 (\$76.35),  
EDC(<25):\$48 (\$61.08),  
OtC(≥75):\$292 (\$371.59),  
OtC(50-75):\$276 (\$351.22),  
OtC(25-50):\$300 (\$381.77),  
OtC(<25):\$240 (\$305.41)

*Diehl et al*[51]  
2010  
US

To evaluate  
respiratory-related  
medical outcomes and  
cost for infants who  
were prescribed and  
received palivizumab in  
accordance with the  
dosing schedule  
recommended by the  
American Academy of  
Paediatrics in 2006  
versus those who did  
not.

Design: Retrospective  
claims analysis  
Follow Up: 7 months  
Sample Size: 245 (A:73,  
NA:172)

Measure: 37 day  
gap in claims  
Classification: (>37  
day gap in claims =  
noncompliant)  
Method of  
Assessment:  
pharmacy claims  
data

Total costs  
Pharmacy  
costs  
Services costs

Type of Costs: unadjusted  
Classification: disease state specific  
Currency Year: USD, 2007  
Cost of Nonadherence:  
TC:\$19093.46 (\$21656.12),  
PC:\$7647.40 (\$8673.81),  
SC<sup>\*\*</sup>:\$11604.03 (\$13161.45)

Quality: medium  
Classification: cost  
description

*Joshi et al*[52]  
2006  
US

Examine the  
association of  
medication adherence  
with workplace  
productivity and health  
related quality of life in  
asthma patients.

Design: quantitative  
analysis  
Follow Up:  
Sample Size: 385  
(high:150, medium:73,  
low: 162)

Measure: Morisky  
scale  
Classification: (0=  
high adherence, 1-  
2 = medium  
adherence, >2 =  
low adherence)  
Method of  
Assessment:

Total  
productivity  
cost  
Absenteeism  
costs  
Presenteeism  
costs

Type of Costs: unadjusted  
Classification: disease state specific  
Currency Year: USD, 2002  
Cost of Nonadherence<sup>##</sup>:  
TPC(0):\$1210.90 (\$1571.73),  
TPC(1-2):\$1428.50 (\$1854.17),  
TPC(>2):\$1073.10 (\$1392.87),  
AbC(0):\$633.70 (\$822.53),  
AbC(1-2):\$608.90 (\$790.34),

Quality: medium  
Classification: cost  
outcome  
description

|    |                               |                                                                                                                                                                                        |                                                                                                                                            |                                                                                                                                                                               |                                                                                                                                                                                                                                   |                                                                                                                                                                                                                                                                                                                                                                                             |                                                                   |
|----|-------------------------------|----------------------------------------------------------------------------------------------------------------------------------------------------------------------------------------|--------------------------------------------------------------------------------------------------------------------------------------------|-------------------------------------------------------------------------------------------------------------------------------------------------------------------------------|-----------------------------------------------------------------------------------------------------------------------------------------------------------------------------------------------------------------------------------|---------------------------------------------------------------------------------------------------------------------------------------------------------------------------------------------------------------------------------------------------------------------------------------------------------------------------------------------------------------------------------------------|-------------------------------------------------------------------|
| 1  |                               |                                                                                                                                                                                        |                                                                                                                                            |                                                                                                                                                                               |                                                                                                                                                                                                                                   |                                                                                                                                                                                                                                                                                                                                                                                             |                                                                   |
| 2  |                               |                                                                                                                                                                                        |                                                                                                                                            |                                                                                                                                                                               |                                                                                                                                                                                                                                   |                                                                                                                                                                                                                                                                                                                                                                                             |                                                                   |
| 3  |                               |                                                                                                                                                                                        |                                                                                                                                            |                                                                                                                                                                               |                                                                                                                                                                                                                                   |                                                                                                                                                                                                                                                                                                                                                                                             |                                                                   |
| 4  |                               |                                                                                                                                                                                        |                                                                                                                                            | questionnaire                                                                                                                                                                 |                                                                                                                                                                                                                                   |                                                                                                                                                                                                                                                                                                                                                                                             |                                                                   |
| 5  |                               |                                                                                                                                                                                        |                                                                                                                                            |                                                                                                                                                                               | AbC(>2):\$474.80 (\$616.28),                                                                                                                                                                                                      |                                                                                                                                                                                                                                                                                                                                                                                             |                                                                   |
| 6  |                               |                                                                                                                                                                                        |                                                                                                                                            |                                                                                                                                                                               | PrC(0):\$577.20 (\$749.20),                                                                                                                                                                                                       |                                                                                                                                                                                                                                                                                                                                                                                             |                                                                   |
| 7  |                               |                                                                                                                                                                                        |                                                                                                                                            |                                                                                                                                                                               | PrC(1-2):\$819.60 (\$1063.83),                                                                                                                                                                                                    |                                                                                                                                                                                                                                                                                                                                                                                             |                                                                   |
| 8  | <i>Miravittles et al</i> [53] | To analyse the economic impact of non-adherence to the global initiative for obstructive lung disease (GOLD) guidelines in patients with chronic obstructive pulmonary disease (COPD). | <u>Design:</u> multicentre, retrospective, observational study<br><u>Follow Up:</u> 18 months<br><u>Sample Size:</u> 1365 (A:246, NA:1119) | <u>Measure:</u> GOLD 2007 Guidelines<br><u>Classification:</u> (adherent, nonadherent)<br><u>Method of Assessment:</u> GOLD guidelines                                        | ED costs<br>Pharmacy costs<br>Physician office visit costs<br>Hospitalization costs<br>Primary care costs<br>Interdisciplinary visit costs<br>Medical test costs<br>Radiology costs<br>Laboratory costs<br>Total healthcare costs | <u>Type of Costs:</u> unadjusted<br><u>Classification:</u> disease state specific<br><u>Currency Year:</u> EUR, 2009<br><u>Cost of Nonadherence:</u><br>EDC:€40.83 (\$57.91),<br>PC:€771.50 (\$1094.27),<br>POC:€106.29 (\$150.76),<br>HC:€101.61 (\$144.12)<br>PCC:€123.84 (\$175.65),<br>IntC:€321.44 (\$455.92),<br>MTC:€36.66 (\$51.99),<br>RC:€24.24 (\$34.38),<br>LC:€17.35 (\$24.61) | <u>Quality:</u> medium<br><u>Classification:</u> cost description |
| 9  | 2013                          |                                                                                                                                                                                        |                                                                                                                                            |                                                                                                                                                                               |                                                                                                                                                                                                                                   |                                                                                                                                                                                                                                                                                                                                                                                             |                                                                   |
| 10 | Spain                         |                                                                                                                                                                                        |                                                                                                                                            |                                                                                                                                                                               |                                                                                                                                                                                                                                   |                                                                                                                                                                                                                                                                                                                                                                                             |                                                                   |
| 11 |                               |                                                                                                                                                                                        |                                                                                                                                            |                                                                                                                                                                               |                                                                                                                                                                                                                                   |                                                                                                                                                                                                                                                                                                                                                                                             |                                                                   |
| 12 |                               |                                                                                                                                                                                        |                                                                                                                                            |                                                                                                                                                                               |                                                                                                                                                                                                                                   |                                                                                                                                                                                                                                                                                                                                                                                             |                                                                   |
| 13 |                               |                                                                                                                                                                                        |                                                                                                                                            |                                                                                                                                                                               |                                                                                                                                                                                                                                   |                                                                                                                                                                                                                                                                                                                                                                                             |                                                                   |
| 14 |                               |                                                                                                                                                                                        |                                                                                                                                            |                                                                                                                                                                               |                                                                                                                                                                                                                                   |                                                                                                                                                                                                                                                                                                                                                                                             |                                                                   |
| 15 |                               |                                                                                                                                                                                        |                                                                                                                                            |                                                                                                                                                                               |                                                                                                                                                                                                                                   |                                                                                                                                                                                                                                                                                                                                                                                             |                                                                   |
| 16 |                               |                                                                                                                                                                                        |                                                                                                                                            |                                                                                                                                                                               |                                                                                                                                                                                                                                   |                                                                                                                                                                                                                                                                                                                                                                                             |                                                                   |
| 17 |                               |                                                                                                                                                                                        |                                                                                                                                            |                                                                                                                                                                               |                                                                                                                                                                                                                                   |                                                                                                                                                                                                                                                                                                                                                                                             |                                                                   |
| 18 |                               |                                                                                                                                                                                        |                                                                                                                                            |                                                                                                                                                                               |                                                                                                                                                                                                                                   |                                                                                                                                                                                                                                                                                                                                                                                             |                                                                   |
| 19 |                               |                                                                                                                                                                                        |                                                                                                                                            |                                                                                                                                                                               |                                                                                                                                                                                                                                   |                                                                                                                                                                                                                                                                                                                                                                                             |                                                                   |
| 20 |                               |                                                                                                                                                                                        |                                                                                                                                            |                                                                                                                                                                               |                                                                                                                                                                                                                                   |                                                                                                                                                                                                                                                                                                                                                                                             |                                                                   |
| 21 |                               |                                                                                                                                                                                        |                                                                                                                                            |                                                                                                                                                                               |                                                                                                                                                                                                                                   |                                                                                                                                                                                                                                                                                                                                                                                             |                                                                   |
| 22 |                               |                                                                                                                                                                                        |                                                                                                                                            |                                                                                                                                                                               |                                                                                                                                                                                                                                   |                                                                                                                                                                                                                                                                                                                                                                                             |                                                                   |
| 23 |                               |                                                                                                                                                                                        |                                                                                                                                            |                                                                                                                                                                               |                                                                                                                                                                                                                                   |                                                                                                                                                                                                                                                                                                                                                                                             |                                                                   |
| 24 |                               |                                                                                                                                                                                        |                                                                                                                                            |                                                                                                                                                                               |                                                                                                                                                                                                                                   |                                                                                                                                                                                                                                                                                                                                                                                             |                                                                   |
| 25 |                               |                                                                                                                                                                                        |                                                                                                                                            |                                                                                                                                                                               |                                                                                                                                                                                                                                   |                                                                                                                                                                                                                                                                                                                                                                                             |                                                                   |
| 26 |                               |                                                                                                                                                                                        |                                                                                                                                            |                                                                                                                                                                               |                                                                                                                                                                                                                                   |                                                                                                                                                                                                                                                                                                                                                                                             |                                                                   |
| 27 |                               |                                                                                                                                                                                        |                                                                                                                                            |                                                                                                                                                                               |                                                                                                                                                                                                                                   |                                                                                                                                                                                                                                                                                                                                                                                             |                                                                   |
| 28 | <i>Quittner et al</i> [54]    | To evaluate associations of adherence to pulmonary medications, age, healthcare use and cost among cystic fibrosis patients.                                                           | <u>Design:</u> retrospective, cohort study<br><u>Follow Up:</u> 2 years<br><u>Sample Size:</u> 3287 (>80%: 663, 50-80%: 949, <50%: 1675)   | <u>Measure:</u> MPR<br><u>Classification:</u> (≥80% = high adherence, 50-80% = moderate adherence, <50% = low adherence)<br><u>Method of Assessment:</u> pharmacy claims data |                                                                                                                                                                                                                                   | <u>Type of Costs:</u> unadjusted<br><u>Classification:</u> all cause and disease state specific<br><u>Currency Year:</u> USD, 2011<br><u>Cost of Nonadherence*:</u><br>All cause:<br>THC(≥80):\$35749.50 (\$38244.05),<br>THC(50-80):\$45031.50 (\$48173.73),<br>THC(<50):\$50284.50 (\$53793.28)<br>Disease state specific:<br>THC(≥80):\$23764 (\$25422.22),                              | <u>Quality:</u> medium<br><u>Classification:</u> cost description |
| 29 | 2014                          |                                                                                                                                                                                        |                                                                                                                                            |                                                                                                                                                                               |                                                                                                                                                                                                                                   |                                                                                                                                                                                                                                                                                                                                                                                             |                                                                   |
| 30 | US                            |                                                                                                                                                                                        |                                                                                                                                            |                                                                                                                                                                               |                                                                                                                                                                                                                                   |                                                                                                                                                                                                                                                                                                                                                                                             |                                                                   |
| 31 |                               |                                                                                                                                                                                        |                                                                                                                                            |                                                                                                                                                                               |                                                                                                                                                                                                                                   |                                                                                                                                                                                                                                                                                                                                                                                             |                                                                   |
| 32 |                               |                                                                                                                                                                                        |                                                                                                                                            |                                                                                                                                                                               |                                                                                                                                                                                                                                   |                                                                                                                                                                                                                                                                                                                                                                                             |                                                                   |
| 33 |                               |                                                                                                                                                                                        |                                                                                                                                            |                                                                                                                                                                               |                                                                                                                                                                                                                                   |                                                                                                                                                                                                                                                                                                                                                                                             |                                                                   |
| 34 |                               |                                                                                                                                                                                        |                                                                                                                                            |                                                                                                                                                                               |                                                                                                                                                                                                                                   |                                                                                                                                                                                                                                                                                                                                                                                             |                                                                   |
| 35 |                               |                                                                                                                                                                                        |                                                                                                                                            |                                                                                                                                                                               |                                                                                                                                                                                                                                   |                                                                                                                                                                                                                                                                                                                                                                                             |                                                                   |
| 36 |                               |                                                                                                                                                                                        |                                                                                                                                            |                                                                                                                                                                               |                                                                                                                                                                                                                                   |                                                                                                                                                                                                                                                                                                                                                                                             |                                                                   |
| 37 |                               |                                                                                                                                                                                        |                                                                                                                                            |                                                                                                                                                                               |                                                                                                                                                                                                                                   |                                                                                                                                                                                                                                                                                                                                                                                             |                                                                   |
| 38 |                               |                                                                                                                                                                                        |                                                                                                                                            |                                                                                                                                                                               |                                                                                                                                                                                                                                   |                                                                                                                                                                                                                                                                                                                                                                                             |                                                                   |
| 39 |                               |                                                                                                                                                                                        |                                                                                                                                            |                                                                                                                                                                               |                                                                                                                                                                                                                                   |                                                                                                                                                                                                                                                                                                                                                                                             |                                                                   |
| 40 |                               |                                                                                                                                                                                        |                                                                                                                                            |                                                                                                                                                                               |                                                                                                                                                                                                                                   |                                                                                                                                                                                                                                                                                                                                                                                             |                                                                   |
| 41 |                               |                                                                                                                                                                                        |                                                                                                                                            |                                                                                                                                                                               |                                                                                                                                                                                                                                   |                                                                                                                                                                                                                                                                                                                                                                                             |                                                                   |
| 42 |                               |                                                                                                                                                                                        |                                                                                                                                            |                                                                                                                                                                               |                                                                                                                                                                                                                                   |                                                                                                                                                                                                                                                                                                                                                                                             |                                                                   |
| 43 |                               |                                                                                                                                                                                        |                                                                                                                                            |                                                                                                                                                                               |                                                                                                                                                                                                                                   |                                                                                                                                                                                                                                                                                                                                                                                             |                                                                   |
| 44 |                               |                                                                                                                                                                                        |                                                                                                                                            |                                                                                                                                                                               |                                                                                                                                                                                                                                   |                                                                                                                                                                                                                                                                                                                                                                                             |                                                                   |
| 45 |                               |                                                                                                                                                                                        |                                                                                                                                            |                                                                                                                                                                               |                                                                                                                                                                                                                                   |                                                                                                                                                                                                                                                                                                                                                                                             |                                                                   |
| 46 |                               |                                                                                                                                                                                        |                                                                                                                                            |                                                                                                                                                                               |                                                                                                                                                                                                                                   |                                                                                                                                                                                                                                                                                                                                                                                             |                                                                   |
| 47 |                               |                                                                                                                                                                                        |                                                                                                                                            |                                                                                                                                                                               |                                                                                                                                                                                                                                   |                                                                                                                                                                                                                                                                                                                                                                                             |                                                                   |

1  
2  
3  
4  
5  
6 **Gastrointestinal**  
7 **Disease**

8 *Carter et al*[55]  
9 2011  
10 US

To further evaluate the impact of adherence to infliximab on CD related utilisation and inpatient costs in the first year of treatment using a different definition of adherence and a larger more diverse claims database.

Design: retrospective, observational cohort claims analysis  
Follow Up: 12 months  
Sample Size: 638 (A:466, NA:172)

Measure: number of infusions in 12 month period  
Classification: (7-9 infusions = adherent, <7 infusions = nonadherent)  
Method of Assessment: health claims data

Hospitalization costs

THC(50-80):\$33132.50 (\$35444.44),  
THC(<50):\$33894 (\$36259.07)

Type of Costs: unadjusted  
Classification: disease state specific  
Currency Year: USD, 2007  
Cost of Nonadherence: HC:\$37783 (\$42854.12)

Quality: medium  
Classification: cost outcome description

20 *Gosselin et al*[56]  
21 2009  
22 US

To examine the effects of gastroesophageal reflux disease (GERD) patients compliance with PPI therapy on health care resource utilisation and costs.

Design: retrospective cohort study  
Follow Up:  
Sample Size: 41837 (A:28321, NA:13516)

Measure: MPR  
Classification: (≥80% = adherent, <80% = nonadherent)  
Method of Assessment: pharmacy claims data

Total costs  
Inpatient costs  
Outpatient costs  
Pharmacy costs  
Medical costs

Type of Costs: adjusted  
Classification: disease state specific  
Currency Year: USD, 2003  
Cost of Nonadherence: TC:\$9497 (\$12085.43), IC:\$2116 (\$2692.72), OC:\$5458 (\$6945.59), PC:\$1922 (\$2445.85), MC:\$7575 (\$9639.58)

Quality: medium  
Classification: cost description

30 *Kane et al*[57]  
31 2009  
32 US

To evaluate adherence to infliximab maintenance therapy and the impact of medication adherence on healthcare utilisation and costs by patients.

Design: retrospective cohort analysis  
Follow Up: 12 months  
Sample Size: 571 (A:375, NA:196)

Measure: number of infusions in 12 month period  
Classification: (≥8 infusions = adherent, <7 infusions = nonadherent)  
Method of

Outpatient costs  
ED costs  
Pharmacy costs  
Medical costs  
Hospitalization costs

Type of Costs: unadjusted  
Classification: all cause and disease state specific  
Currency Year: USD, 2004  
Cost of Nonadherence: All cause: OC:\$6679 (\$8272.62), EDC:\$314 (\$388.92), MC:\$16129 (\$19977.40),

Quality: medium  
Classification: cost outcome description

|    |                         |                       |                               |                        |                          |                                              |
|----|-------------------------|-----------------------|-------------------------------|------------------------|--------------------------|----------------------------------------------|
| 1  |                         |                       |                               |                        |                          |                                              |
| 2  |                         |                       |                               |                        |                          |                                              |
| 3  |                         |                       |                               |                        |                          |                                              |
| 4  |                         |                       | <u>Assessment:</u>            |                        | HC:\$6893 (\$8537.68)    |                                              |
| 5  |                         |                       | health claims data            |                        | Disease state specific:  |                                              |
| 6  |                         |                       |                               |                        | OC:\$3931 (\$4868.94),   |                                              |
| 7  |                         |                       |                               |                        | EDC:\$91 (\$112.71),     |                                              |
| 8  |                         |                       |                               |                        | PC:\$18751 (\$23225.01), |                                              |
| 9  |                         |                       |                               |                        | MC:\$10243 (\$12686.99), |                                              |
| 10 |                         |                       |                               |                        | HC:\$4494 (\$5566.27)    |                                              |
| 11 | <i>Mitra et al</i> [58] | To assess the         | <u>Design:</u> retrospective, | <u>Measure:</u> MPR    | Inpatient costs          | <u>Type of Costs:</u> adjusted               |
| 12 | 2012                    | association between   | observational cohort          | <u>Classification:</u> | Outpatient               | <u>Classification:</u> all cause and disease |
| 13 | US                      | adherence to oral 5-  | study                         | (≥80% = adherent,      | costs                    | state specific                               |
| 14 |                         | aminosalicylates (5-  | <u>Follow Up:</u> 12 months   | <80% =                 | ED costs                 | <u>Currency Year:</u> USD, 2010              |
| 15 |                         | ASAs) and all cause   | <u>Sample Size:</u> 1693      | nonadherent)           | Pharmacy                 | <u>Cost of Nonadherence:</u>                 |
| 16 |                         | costs and health care | (A:476, NA:1216)              | <u>Method of</u>       | costs                    | All cause:                                   |
| 17 |                         | utilisation among     |                               | <u>Assessment:</u>     | Ancillary costs          | PC:\$1541.60 (\$1681.55)                     |
| 18 |                         | patients with active  |                               | pharmacy claims        | Non-pharmacy             | Disease state specific:                      |
| 19 |                         | ulcerative colitis.   |                               | data                   | costs                    | IC:\$28726.65 (\$31334.47),                  |
| 20 |                         |                       |                               |                        |                          | OC:\$1145.67 (\$1249.67),                    |
| 21 |                         |                       |                               |                        |                          | EDC:\$635.95 (\$693.68),                     |
| 22 |                         |                       |                               |                        |                          | AC:\$4923.29 (\$5370.23),                    |
| 23 |                         |                       |                               |                        |                          | NPC:\$14226.32 (\$15517.79)                  |
| 24 |                         |                       |                               |                        |                          |                                              |
| 25 |                         |                       |                               |                        |                          |                                              |
| 26 | <i>Wan et al</i> [59]   | To examine the effect | <u>Design:</u> retrospective  | <u>Measure:</u> MPR    | Total costs              | <u>Type of Costs:</u> adjusted               |
| 27 | 2014                    | of adherence versus   | cohort analysis               | <u>Classification:</u> | Total                    | <u>Classification:</u> all cause and disease |
| 28 | US                      | non-adherence on      | <u>Follow Up:</u> 360 days    | (≥80% = adherent,      | healthcare               | state specific                               |
| 29 |                         | healthcare costs in   | <u>Sample Size:</u> 1646      | <80% =                 | costs                    | <u>Currency Year:</u> USD, 2009              |
| 30 |                         | patients with         | (A:674, NA:972)               | nonadherent)           | Inpatient costs          | <u>Cost of Nonadherence:</u>                 |
| 31 |                         | inflammatory bowel    |                               | <u>Method of</u>       | Outpatient               | All cause:                                   |
| 32 |                         | disease.              |                               | <u>Assessment:</u>     | costs                    | TC:\$47411 (\$52341.27),                     |
| 33 |                         |                       |                               | pharmacy claims        | ED costs                 | THC:\$32522 (\$35903.96),                    |
| 34 |                         |                       |                               | data                   | Pharmacy                 | IC:\$17634 (\$19467.76),                     |
| 35 |                         |                       |                               |                        | costs                    | OC:\$10909 (\$12043.43),                     |
| 36 |                         |                       |                               |                        |                          | EDC:\$458 (\$505.63),                        |
| 37 |                         |                       |                               |                        |                          | PC:\$18410 (\$20324.46)                      |
| 38 |                         |                       |                               |                        |                          | Disease state specific:                      |
| 39 |                         |                       |                               |                        |                          |                                              |
| 40 |                         |                       |                               |                        |                          |                                              |
| 41 |                         |                       |                               |                        |                          |                                              |
| 42 |                         |                       |                               |                        |                          |                                              |
| 43 |                         |                       |                               |                        |                          |                                              |
| 44 |                         |                       |                               |                        |                          |                                              |
| 45 |                         |                       |                               |                        |                          |                                              |
| 46 |                         |                       |                               |                        |                          |                                              |
| 47 |                         |                       |                               |                        |                          |                                              |

1  
2  
3  
4  
5  
6  
7  
8  
9  
10  
11  
12  
13  
14  
15  
16  
17  
18  
19  
20  
21  
22  
23  
24  
25  
26  
27  
28  
29  
30  
31  
32  
33  
34  
35  
36  
37  
38  
39  
40  
41  
42  
43  
44  
45  
46  
47

**Epilepsy**  
*Davis et al*[60]  
2008  
US

To assess the extent of refill non-adherence with antiepileptic drugs (AEDs) and the potential association between AED non-adherence and healthcare costs in an adult managed care population.

Design: retrospective claims analysis  
Follow Up: 12 months  
Sample Size: 10892 (A:6644, NA:4248)

Measure: MPR  
Classification: (≥80% = adherent, <80% = nonadherent)  
Method of Assessment: pharmacy claims data

Total costs  
Inpatient costs  
ED costs  
Pharmacy costs  
Other pharmacy costs

TC:\$33652 (\$37151.47),  
THC:\$18764 (\$20715.27),  
IC:\$12564 (\$13870.53),  
OC:\$5890 (\$6502.50),  
EDC:\$48 (\$52.99),  
PC:\$15150 (\$16725.45)

Type of Costs: unadjusted  
Classification: disease state specific  
Currency Year: USD, 2003  
Cost of Nonadherence###:  
TC:\$1466 (\$1865.56),  
IC:\$1799 (\$2289.32),  
EDC:\$260 (\$330.86),  
PC:-\$71 (-\$90.35),  
OtPC:-\$358 (-\$455.57)

Quality: medium  
Classification: cost description

*Ettinger et al*[61]  
2009  
US

To assess the extent to which elderly patients diagnosed with epilepsy are non-adherent to antiepileptic drugs (AEDs) and the potential association between AED non-adherence and seizure recurrence, resource utilisation and annual direct medical costs.

Design: retrospective claims analysis  
Follow Up: 12 months  
Sample Size: 1278 (A:758, NA:520)

Measure: MPR  
Classification: (≥80% = adherent, <80% = nonadherent)  
Method of Assessment: pharmacy claims data

Total costs  
Inpatient costs  
ED costs  
Pharmacy costs  
Physician Office visit costs  
Ancillary costs  
Other pharmacy costs

Type of Costs: unadjusted  
Classification: disease state specific  
Currency Year: USD, 2003  
Cost of Nonadherence:  
TC:\$17817 (\$22673.06),  
IC:\$2714 (\$3453.71),  
EDC:\$526 (\$669.36),  
PC:\$347 (\$441.58),  
POC:\$3063 (\$3897.83),  
AC:\$8344 (\$10618.18),  
OtPC:\$2822 (\$3591.14)

Quality: medium  
Classification: cost outcome description

*Faught et al*[62]  
2009  
US

To study the impact of non-adherence to antiepileptic drugs

Design: retrospective observational open cohort design

Measure: MPR  
Classification: (≥80% = adherent,

Total costs  
Inpatient costs  
Outpatient

Type of Costs: unadjusted  
Classification: disease state specific  
Currency Year: USD, 2002

Quality: medium  
Classification: cost description

|    |                           |                        |                              |                        |                 |                                                |
|----|---------------------------|------------------------|------------------------------|------------------------|-----------------|------------------------------------------------|
| 1  |                           |                        |                              |                        |                 |                                                |
| 2  |                           |                        |                              |                        |                 |                                                |
| 3  |                           | (AEDs) on healthcare   | <u>Follow Up:</u> 4.65 years | <80% =                 | costs           | <u>Cost of Nonadherence</u> * :                |
| 4  |                           | utilisation and direct | <u>Sample Size:</u> 33658    | nonadherent)           | ED costs        | TC:\$14417.64 (\$18713.91),                    |
| 5  |                           | medical costs in a     | (A:24907, NA:8751)           | <u>Method of</u>       | Pharmacy        | IC:\$6682.28 (\$6873.51),                      |
| 6  |                           | Medicaid population.   |                              | <u>Assessment:</u>     | costs           | OC:\$2172.40 (\$2819.75),                      |
| 7  |                           |                        |                              | pharmacy claims        | Other           | EDC:\$405.96 (\$526.93),                       |
| 8  |                           |                        |                              | data                   | pharmacy        | PC:\$822.40 (\$1067.46),                       |
| 9  |                           |                        |                              |                        | costs           | OtPC:\$4334.60 (\$5626.26)                     |
| 10 |                           |                        |                              |                        |                 |                                                |
| 11 | <b>HIV/AIDS</b>           |                        |                              |                        |                 |                                                |
| 12 | <i>Barnett et al</i> [63] | To characterise the    | <u>Design:</u> retrospective | <u>Measure:</u>        | Total costs     | <u>Type of Costs:</u> unadjusted               |
| 13 | 2011                      | cost of HIV care       | observational cohort         | antiretroviral         |                 | <u>Classification:</u> disease state specific; |
| 14 | US                        | including combination  | study                        | taking behaviour       |                 | viral load count                               |
| 15 |                           | antiretroviral         | <u>Follow Up:</u> 1 year     | <u>Classification:</u> |                 | <u>Currency Year:</u> USD, 2006                |
| 16 |                           | treatment.             | <u>Sample Size:</u> 1896     | (85% adherence         |                 | <u>Cost of Nonadherence</u> ** :               |
| 17 |                           |                        | (not specified)              | with 3                 |                 | High viral load:                               |
| 18 |                           |                        |                              | antiretroviral         |                 | TC:\$25824 (\$30067.54)                        |
| 19 |                           |                        |                              | therapy regimen =      |                 | Low viral load:                                |
| 20 |                           |                        |                              | adherent, all other    |                 | TC:\$20509.67 (\$23879.92)                     |
| 21 |                           |                        |                              | use =                  |                 |                                                |
| 22 |                           |                        |                              | nonadherent)           |                 |                                                |
| 23 |                           |                        |                              | <u>Method of</u>       |                 |                                                |
| 24 |                           |                        |                              | <u>Assessment:</u>     |                 |                                                |
| 25 |                           |                        |                              | pharmacy claims        |                 |                                                |
| 26 |                           |                        |                              | data                   |                 |                                                |
| 27 |                           |                        |                              |                        |                 |                                                |
| 28 |                           |                        |                              |                        |                 |                                                |
| 29 |                           |                        |                              |                        |                 |                                                |
| 30 | <i>Cooke et al</i> [64]   | To measure adherence   | <u>Design:</u> retrospective | <u>Measure:</u> MPR    | Total           | <u>Type of Costs:</u> unadjusted               |
| 31 | 2014                      | to antiretroviral      | claims analysis              | <u>Classification:</u> | healthcare      | <u>Classification:</u> disease state specific  |
| 32 | US                        | therapy regimens in    | <u>Follow Up:</u> 1 year     | (≥90% = adherent,      | costs           | <u>Currency Year:</u> USD, 2011                |
| 33 |                           | commercially insured   | <u>Sample Size:</u> 3528     | <90% =                 | Inpatient costs | <u>Cost of Nonadherence:</u>                   |
| 34 |                           | patients with HIV      | (A:1737, NA:640)             | nonadherent)           | Outpatient      | THC:\$18868 (\$20184.58),                      |
| 35 |                           | infection and analyse  |                              | <u>Method of</u>       | costs           | IC:\$2700 (\$2888.40),                         |
| 36 |                           | the clinical and       |                              | <u>Assessment:</u>     | Pharmacy        | OC:\$915 (\$978.85),                           |
| 37 |                           | demographic factors    |                              | pharmacy claims        | costs           | PC:\$15253 (\$16317.33)                        |
| 38 |                           | associated with ≥90%   |                              | data                   |                 |                                                |
| 39 |                           | adherence.             |                              |                        |                 |                                                |
| 40 |                           |                        |                              |                        |                 |                                                |
| 41 |                           |                        |                              |                        |                 |                                                |
| 42 |                           |                        |                              |                        |                 |                                                |
| 43 |                           |                        |                              |                        |                 |                                                |
| 44 |                           |                        |                              |                        |                 |                                                |
| 45 |                           |                        |                              |                        |                 |                                                |
| 46 |                           |                        |                              |                        |                 |                                                |
| 47 |                           |                        |                              |                        |                 |                                                |

|    |                          |                         |                                |                        |                 |                                               |
|----|--------------------------|-------------------------|--------------------------------|------------------------|-----------------|-----------------------------------------------|
| 1  |                          |                         |                                |                        |                 |                                               |
| 2  |                          |                         |                                |                        |                 |                                               |
| 3  | <i>Pruitt et al</i> [65] | To examine Medicaid     | <u>Design:</u> retrospective   | <u>Measure:</u> MPR    | Total costs     | <u>Type of Costs:</u> unadjusted              |
| 4  | 2015                     | insured HIV positive    | cohort study                   | <u>Classification:</u> | Inpatient costs | <u>Classification:</u> disease state specific |
| 5  | US                       | and AIDS diagnosed      | <u>Follow Up:</u> 2 years      | (≥90% = adherent,      | Outpatient      | <u>Currency Year:</u> USD, 2009               |
| 6  |                          | patient groups          | <u>Sample Size:</u> 502 (A:56, | <90% =                 | costs           | <u>Cost of Nonadherence*:</u>                 |
| 7  |                          | separately to           | NA:176)                        | nonadherent)           | Pharmacy        | HIV:                                          |
| 8  |                          | determine association   |                                | <u>Method of</u>       | costs           | TC:\$15360 (\$16957.32),                      |
| 9  |                          | of ART adherence to     |                                | <u>Assessment:</u>     | Other           | IC:\$3864 (\$4265.76),                        |
| 10 |                          | mean monthly total      |                                | pharmacy claims        | pharmacy        | OC:\$3948 (\$4358.52),                        |
| 11 |                          | healthcare              |                                | data                   | costs           | PC:\$4956 (\$5471.40),                        |
| 12 |                          | expenditures in the 24  |                                |                        | Behavioural     | OtPC:\$1764 (\$1947.48),                      |
| 13 |                          | month measurement       |                                |                        | health          | BHIC:\$840 (\$927.36)                         |
| 14 |                          | period.                 |                                |                        | inpatient costs | AIDS:                                         |
| 15 |                          |                         |                                |                        |                 | TC:\$27648 (\$30523.08),                      |
| 16 |                          |                         |                                |                        |                 | IC:\$13008 (\$14360.76),                      |
| 17 |                          |                         |                                |                        |                 | OC:\$5880 (\$6491.52),                        |
| 18 |                          |                         |                                |                        |                 | PC:\$5640 (\$6226.56),                        |
| 19 |                          |                         |                                |                        |                 | OtPC:\$2580 (\$2848.32),                      |
| 20 |                          |                         |                                |                        |                 | BHIC:\$528 (\$582.96)                         |
| 21 |                          |                         |                                |                        |                 |                                               |
| 22 |                          |                         |                                |                        |                 |                                               |
| 23 |                          |                         |                                |                        |                 |                                               |
| 24 | <b>Parkinson's</b>       |                         |                                |                        |                 |                                               |
| 25 | <b>Disease</b>           |                         |                                |                        |                 |                                               |
| 26 | <i>Davis et al</i> [66]  | To assess the extent to | <u>Design:</u> retrospective   | <u>Measure:</u> MPR    | Total costs     | <u>Type of Costs:</u> unadjusted              |
| 27 | 2010                     | which patients          | administrative claims          | <u>Classification:</u> | Pharmacy        | <u>Classification:</u> disease state specific |
| 28 | US                       | diagnosed with          | study                          | (≥80% = adherent,      | costs           | <u>Currency Year:</u> USD, 2001               |
| 29 |                          | Parkinson's disease are | <u>Follow Up:</u> 12 months    | <80% =                 | Medical costs   | <u>Cost of Nonadherence:</u>                  |
| 30 |                          | non-adherent with       | <u>Sample Size:</u> 3119       | nonadherent)           |                 | TC:\$18511 (\$24262.36),                      |
| 31 |                          | antiparkinson therapy   | (A:1211, NA:1908)              | <u>Method of</u>       |                 | PC:\$2684 (\$3537.36),                        |
| 32 |                          | and the potential       |                                | <u>Assessment:</u>     |                 | MC:\$15827 (\$20859.12)                       |
| 33 |                          | association between     |                                | pharmacy claims        |                 |                                               |
| 34 |                          | non-adherence and all   |                                | data                   |                 |                                               |
| 35 |                          | cause medical costs.    |                                |                        |                 |                                               |
| 36 |                          |                         |                                |                        |                 |                                               |
| 37 |                          |                         |                                |                        |                 |                                               |
| 38 | <i>Delea et al</i> [67]  | To assess the           | <u>Design:</u> retrospective   | <u>Measure:</u> PDC    | Total costs     | <u>Type of Costs:</u> adjusted and unadjusted |
| 39 | 2011                     | associations between    | historical cohort study        | <u>Classification:</u> | Inpatient costs | <u>Classification:</u> all cause and disease  |
| 40 | US                       | adherence to            | <u>Follow Up:</u> 12 months    | (≥80% =                | Pharmacy        | state specific                                |
| 41 |                          |                         |                                |                        |                 | <u>Quality:</u> high                          |
| 42 |                          |                         |                                |                        |                 | <u>Classification:</u> cost                   |
| 43 |                          |                         |                                |                        |                 | description                                   |
| 44 |                          |                         |                                |                        |                 |                                               |
| 45 |                          |                         |                                |                        |                 |                                               |
| 46 |                          |                         |                                |                        |                 |                                               |
| 47 |                          |                         |                                |                        |                 |                                               |

1  
2  
3  
4  
5  
6  
7  
8  
9  
10  
11  
12  
13  
14  
15  
16  
17  
18  
19  
20  
21  
22  
23  
24  
25  
26  
27  
28  
29  
30  
31  
32  
33  
34  
35  
36  
37  
38  
39  
40  
41  
42  
43  
44  
45  
46  
47

levodopa/carbidopa/e  
ntacapone therapy and  
healthcare utilisation  
and costs.

Sample Size: 1215  
(A:617, NA:598)

satisfactory, <80%  
= unsatisfactory)  
Method of  
Assessment:  
pharmacy claims  
data

costs  
Other costs

Currency Year: USD, 2005

Cost of Nonadherence:

Adjusted all cause:

TC:\$19686 (\$23625.30),

IC:\$5954 (\$7145.43),

PC:\$6391 (\$7669.88),

OtC:\$8795 (\$10554.94)

Adjusted disease state specific:

TC:\$8574 (\$10289.71),

IC:\$3705 (\$4446.39),

PC:\$3850 (\$4620.41),

OtC:\$1884 (\$2261)

Unadjusted all cause:

TC:\$19362 (\$23236.46),

IC:\$5463 (\$6556.18),

PC:\$6158 (\$7390.26),

OtC:\$7740 (\$9288.82)

Unadjusted disease state specific:

TC:\$9156 (\$10988.18),

IC:\$3238 (\$3885.94),

PC:\$3789 (\$4547.20),

OtC:\$2129 (\$2555.03)

*Wei et al*[68]  
2014  
US

To examine the  
associations of  
adherence to  
antiparkinson drugs  
with healthcare  
utilisation and  
economic outcomes.

Design: retrospective  
cross-sectional study  
Follow Up: 19 months  
Sample Size: 7583 (90-  
100%:3948, 80-  
89%:1456, ≤79%:2179)

Measure: MPR  
Classification:  
(>90<100% = high,  
>80<89% =  
moderate, ≤79% =  
low)  
Method of  
Assessment:  
pharmacy claims  
data

Total costs  
Inpatient costs  
Outpatient  
costs  
Pharmacy  
costs

Type of Costs: unadjusted

Classification: disease state specific

Currency Year: USD, 2007

Cost of Nonadherence:

TC(90-100):\$36407 (\$41293.43),

TC(80-89):\$43417 (\$49244.29),

TC(≤79):\$45867 (\$52023.13),

IC(90-100):\$15294 (\$17346.71),

IC(80-89):\$21603 (\$24502.49),

IC(≤79):\$24727 (\$28045.78),

OC(90-100):\$10155 (\$11517.97),

Quality: medium

Classification: cost  
description



|    |                           |                         |                              |                        |                                  |                                                 |
|----|---------------------------|-------------------------|------------------------------|------------------------|----------------------------------|-------------------------------------------------|
| 1  |                           |                         |                              |                        |                                  |                                                 |
| 2  |                           |                         |                              |                        |                                  |                                                 |
| 3  |                           |                         |                              |                        |                                  |                                                 |
| 4  |                           |                         |                              |                        | OC(80-89):\$11838 (\$13426.86),  |                                                 |
| 5  |                           |                         |                              |                        | OC(≤79):\$12889 (\$14618.92),    |                                                 |
| 6  |                           |                         |                              |                        | PC(90-100):\$10957 (\$12427.61), |                                                 |
| 7  |                           |                         |                              |                        | PC(80-89):\$9976 (\$11314.95),   |                                                 |
| 8  |                           |                         |                              |                        | PC(≤79):\$8251 (\$9358.42)       |                                                 |
| 9  | <b>Musculoskeletal</b>    |                         |                              |                        |                                  |                                                 |
| 10 | <i>Ivanova et al</i> [69] | To compare the rates    | <u>Design:</u> retrospective | <u>Measure:</u> MPR    | Total costs                      | <u>Type of Costs:</u> unadjusted                |
| 11 | 2012                      | of severe relapse and   | cohort study                 | <u>Classification:</u> | Total                            | <u>Classification:</u> all cause, disease state |
| 12 | US                        | total direct and        | <u>Follow Up:</u> 2 years    | (≥80% = adherent,      | healthcare                       | specific and indirect                           |
| 13 |                           | indirect costs over a 2 | <u>Sample Size:</u> 648      | <80% =                 | costs                            | <u>Currency Year:</u> USD, 2007                 |
| 14 |                           | year period between     | (A:448, NA:200)              | nonadherent)           | Inpatient costs                  | <u>Cost of Nonadherence</u> *:                  |
| 15 |                           | US based employees      |                              | <u>Method of</u>       | Outpatient                       | All cause:                                      |
| 16 |                           | with MS who were        |                              | <u>Assessment:</u>     | costs                            | TC:\$8079 (\$9276.76),                          |
| 17 |                           | adherent and non-       |                              | pharmacy claims        | ED costs                         | THC:\$6022 (\$6830.25),                         |
| 18 |                           | adherent to disease     |                              | data                   | Pharmacy                         | IC:\$1030.50 (\$1168.81),                       |
| 19 |                           | modifying drugs.        |                              |                        | costs                            | OC:\$3231 (\$3664.65),                          |
| 20 |                           |                         |                              |                        | Medical costs                    | EDC:\$143.50 (\$162.76),                        |
| 21 |                           |                         |                              |                        | Short term                       | PC:\$1617 (\$1834.03),                          |
| 22 |                           |                         |                              |                        | disability costs                 | MC:\$4405.50 (\$4996.79)                        |
| 23 |                           |                         |                              |                        | Absenteeism                      | Disease state specific:                         |
| 24 |                           |                         |                              |                        | cost                             | TC:\$3005 (\$3408.32),                          |
| 25 |                           |                         |                              |                        |                                  | IC:\$505 (\$572.78),                            |
| 26 |                           |                         |                              |                        |                                  | OC:\$1710 (\$1939.51),                          |
| 27 |                           |                         |                              |                        |                                  | EDC:\$37 (\$41.97),                             |
| 28 |                           |                         |                              |                        |                                  | PC:\$753 (\$854.07),                            |
| 29 |                           |                         |                              |                        |                                  | MC:\$2252 (\$2554.26)                           |
| 30 |                           |                         |                              |                        |                                  | Indirect:                                       |
| 31 |                           |                         |                              |                        |                                  | STDC:\$1231 (\$1396.22),                        |
| 32 |                           |                         |                              |                        |                                  | AbC:\$826 (\$936.86)                            |
| 33 |                           |                         |                              |                        |                                  |                                                 |
| 34 |                           |                         |                              |                        |                                  |                                                 |
| 35 |                           |                         |                              |                        |                                  |                                                 |
| 36 |                           |                         |                              |                        |                                  |                                                 |
| 37 | <i>Tan et al</i> [70]     | To assess the impact of | <u>Design:</u> retrospective | <u>Measure:</u> MPR    | Medical costs                    | <u>Type of Costs:</u> adjusted and unadjusted   |
| 38 | 2011                      | treatment adherence     | cohort study                 | <u>Classification:</u> |                                  | <u>Classification:</u> disease state specific   |
| 39 | US                        | on MS related           | <u>Follow Up:</u> 12 months  | (≥80% = adherent,      |                                  | <u>Currency Year:</u> USD, 2007                 |
| 40 |                           | hospitalizations        | <u>Sample Size:</u> 2446     | <80% =                 |                                  | <u>Cost of Nonadherence:</u>                    |
| 41 |                           |                         |                              |                        |                                  | description                                     |
| 42 |                           |                         |                              |                        |                                  |                                                 |
| 43 |                           |                         |                              |                        |                                  |                                                 |
| 44 |                           |                         |                              |                        |                                  |                                                 |
| 45 |                           |                         |                              |                        |                                  |                                                 |
| 46 |                           |                         |                              |                        |                                  |                                                 |
| 47 |                           |                         |                              |                        |                                  |                                                 |

|    |                         |                          |                              |                        |                       |                                               |
|----|-------------------------|--------------------------|------------------------------|------------------------|-----------------------|-----------------------------------------------|
| 1  |                         |                          |                              |                        |                       |                                               |
| 2  |                         |                          |                              |                        |                       |                                               |
| 3  |                         | (inpatient), ER visits,  | (A:1459, NA:987)             | nonadherent)           | Adjusted:             |                                               |
| 4  |                         | MS relapses and          |                              | <u>Method of</u>       | MC:\$4348 (\$5062.49) |                                               |
| 5  |                         | medical costs.           |                              | <u>Assessment:</u>     | Unadjusted:           |                                               |
| 6  |                         |                          |                              | pharmacy claims        | MC:\$5179 (\$6030.04) |                                               |
| 7  |                         |                          |                              | data                   |                       |                                               |
| 8  |                         |                          |                              |                        |                       |                                               |
| 9  | <b>Zhao et al[71]</b>   | To examine predictors    | <u>Design:</u> retrospective | <u>Measure:</u> MPR    | Total costs           | <u>Type of Costs:</u> adjusted                |
| 10 | 2011                    | associated with          | cohort analysis              | <u>Classification:</u> | Inpatient costs       | <u>Classification:</u> disease state specific |
| 11 | US                      | duloxetine adherence     | <u>Follow Up:</u> 12 months  | (≥80% = adherent,      | Outpatient            | <u>Currency Year:</u> USD, 2008               |
| 12 |                         | and its association with | <u>Sample Size:</u> 5435     | <80% =                 | costs                 | <u>Cost of Nonadherence:</u> commercial:      |
| 13 |                         | healthcare costs         | (A:1744, NA:3691)            | nonadherent)           | Pharmacy              | TC:\$20323 (\$22609.12),                      |
| 14 |                         | among fibromyalgia       |                              | <u>Method of</u>       | costs                 | IC:\$4808 (\$5348.85),                        |
| 15 |                         | patients.                |                              | <u>Assessment:</u>     |                       | OC:\$9822 (\$10926.87),                       |
| 16 |                         |                          |                              | pharmacy claims        |                       | PC:\$5693 (\$6333.40)                         |
| 17 |                         |                          |                              | data                   |                       | <u>Medicare:</u>                              |
| 18 |                         |                          |                              |                        |                       | TC:\$25282 (\$28125.96),                      |
| 19 |                         |                          |                              |                        |                       | IC:\$8604 (\$9571.86),                        |
| 20 |                         |                          |                              |                        |                       | OC:\$10068 (\$11200.54),                      |
| 21 |                         |                          |                              |                        |                       | PC:\$6611 (\$7354.67)                         |
| 22 |                         |                          |                              |                        |                       |                                               |
| 23 |                         |                          |                              |                        |                       |                                               |
| 24 | <b>Cancer</b>           |                          |                              |                        |                       |                                               |
| 25 | <b>Darkow et al[72]</b> | Estimate the             | <u>Design:</u> retrospective | <u>Measure:</u> MPR    | Total                 | <u>Type of Costs:</u> unadjusted              |
| 26 | 2007                    | association between      | observational cohort         | <u>Classification:</u> | healthcare            | <u>Classification:</u> disease state specific |
| 27 | US                      | treatment                | analysis                     | (≥95% = very high,     | costs                 | <u>Currency Year:</u> USD, 2004               |
| 28 |                         | interruptions and non-   | <u>Follow Up:</u> 12 months  | >90<95% = high,        | Inpatient costs       | <u>Cost of Nonadherence:</u>                  |
| 29 |                         | adherence with           | <u>Sample Size:</u> 267      | >50<90% =              | Outpatient            | THC(≥95):\$42250 (\$52330.90),                |
| 30 |                         | imatinib and             | (≥95%:120, 90-95%:25,        | intermediate,          | costs                 | THC(90-95):\$39236 (\$48597.76),              |
| 31 |                         | healthcare costs for US  | 50-90%:69, <50%:53)          | <50% = low)            | ED costs              | THC(50-90):\$54770 (\$67838.19),              |
| 32 |                         | managed care patients.   |                              | <u>Method of</u>       | Pharmacy              | THC(<50):\$131357 (\$162698.93),              |
| 33 |                         |                          |                              | <u>Assessment:</u>     | costs                 | IC(≥95):\$1156 (\$1431.82),                   |
| 34 |                         |                          |                              | pharmacy claims        | Medical costs         | IC(90-95):\$1362 (\$1686.97),                 |
| 35 |                         |                          |                              | data                   | Other                 | IC(50-90):\$19096 (\$23652.33),               |
| 36 |                         |                          |                              |                        | pharmacy              | IC(<50):\$81572 (\$101035.18),                |
| 37 |                         |                          |                              |                        | costs                 | OC(≥95):\$9299 (\$11517.75),                  |
| 38 |                         |                          |                              |                        | Other costs           | OC(90-95):\$11148 (\$13807.93),               |
| 39 |                         |                          |                              |                        |                       |                                               |
| 40 |                         |                          |                              |                        |                       |                                               |
| 41 |                         |                          |                              |                        |                       |                                               |
| 42 |                         |                          |                              |                        |                       |                                               |
| 43 |                         |                          |                              |                        |                       |                                               |
| 44 |                         |                          |                              |                        |                       |                                               |
| 45 |                         |                          |                              |                        |                       |                                               |
| 46 |                         |                          |                              |                        |                       |                                               |
| 47 |                         |                          |                              |                        |                       |                                               |

For peer review

OC(50-90):\$14631 (\$18121.97),  
 OC(<50):\$33956 (\$42057.94),  
 EDC(≥95):\$36 (\$44.59),  
 EDC(90-95):\$568 (\$703.53),  
 EDC(50-90):\$104 (\$128.81),  
 EDC(<50):\$183 (\$226.66),  
 PC(≥95):\$29056 (\$35988.80),  
 PC(90-95):\$23693 (\$29346.18),  
 PC(50-90):\$18330 (\$22703.56),  
 PC(<50):\$8733 (\$10816.70),  
 MC(≥95):\$10731 (\$13291.43),  
 MC(90-95):\$13452 (\$16661.66),  
 MC(50-90):\$34202 (\$42362.64),  
 MC(<50):\$116892  
 (\$144782.57),OtPC(≥95):\$2462  
 (\$3049.44),  
 OtPC(90-95):\$2091 (\$2589.92),  
 OtPC(50-90):\$2238 (\$2771.99),  
 OtPC(<50):\$5732 (\$7099.66),  
 OtC(≥95):\$241 (\$298.50),  
 OtC(90-95):\$374 (\$463.24),  
 OtC(50-90):\$371 (\$459.52),  
 OtC(<50):\$1181 (\$1462.79)

30 *Wu et al*[73]  
 31 2010  
 32 US

To examine the  
 association between  
 adherence with  
 imatinib and direct  
 healthcare costs and  
 resource utilisation

Design: retrospective  
 observational cohort  
 analysis  
Follow Up: 12 months  
Sample Size: 592  
 (A:350, NA:242)

Measure: MPR  
Classification:  
 (≥85% = high  
 adherence, <85%  
 = low adherence )  
Method of  
 Assessment:  
 pharmacy claims  
 data

Total costs  
 Inpatient costs  
 Outpatient  
 costs  
 ED costs  
 Pharmacy  
 costs  
 Other  
 pharmacy  
 costs

Type of Costs: unadjusted  
Classification: disease state specific  
Currency Year: USD, 2008  
Cost of Nonadherence:  
 TC:\$107341 (\$119415.73),  
 IC:\$44498 (\$49503.55),  
 OC:\$34097 (\$37932.55),  
 EDC:\$248 (\$275.90),  
 PC:\$22846 (\$25415.93),  
 OtPC:\$5652 (\$6287.79)

Quality: medium  
Classification: cost  
 description

## Addiction

|                                                                                                    |                                         |                                                                                                                                                                 |                                                                                                                                                        |                                                                                                                                                                     |                                                                                                                                              |                                                                                                                                                                                                                                                                                                                                                  |                                                                   |
|----------------------------------------------------------------------------------------------------|-----------------------------------------|-----------------------------------------------------------------------------------------------------------------------------------------------------------------|--------------------------------------------------------------------------------------------------------------------------------------------------------|---------------------------------------------------------------------------------------------------------------------------------------------------------------------|----------------------------------------------------------------------------------------------------------------------------------------------|--------------------------------------------------------------------------------------------------------------------------------------------------------------------------------------------------------------------------------------------------------------------------------------------------------------------------------------------------|-------------------------------------------------------------------|
| 1<br>2<br>3<br>4<br>5<br>6<br>7<br>8<br>9<br>10<br>11<br>12<br>13<br>14<br>15                      | <i>Leider et al</i> [74]<br>2011<br>US  | To assess the economic burden of chronic opioid users and to determine whether opioid regimen non-adherence contributes to increased healthcare costs.          | <u>Design:</u> retrospective claims based analysis<br><u>Follow Up:</u> 12 months<br><u>Sample Size:</u> 2100 (A:442, NA:1658)                         | <u>Measure:</u> urine testing<br><u>Classification:</u> (positive test = nonadherent, negative test = adherent )<br><u>Method of Assessment:</u> health claims data | Total healthcare costs<br>Inpatient costs<br>Outpatient costs<br>ED costs<br>Pharmacy costs<br>Medical costs                                 | <u>Type of Costs:</u> unadjusted<br><u>Classification:</u> disease state specific<br><u>Currency Year:</u> USD, 2008<br><u>Cost of Nonadherence:</u><br>THC:\$26433 (\$29406.43),<br>IC:\$6361 (\$7076.55),<br>OC:\$9734 (\$10828.97),<br>EDC:\$421 (\$468.36),<br>PC:\$7960 (\$8855.42),<br>MC:\$1957 (\$2177.14)                               | <u>Quality:</u> medium<br><u>Classification:</u> cost analysis    |
| 16<br>17<br>18<br>19<br>20<br>21<br>22<br>23<br>24<br>25<br>26<br>27<br>28<br>29<br>30             | <i>Ruetsch et al</i> [75]<br>2017<br>US | To examine patient characteristics and outcomes associated with nonadherence to buprenorphine and to identify specific patterns of nonadherent behaviour.       | <u>Design:</u> cross sectional, retrospective analysis<br>health claims data<br><u>Follow Up:</u> 12 months<br><u>Sample Size:</u> 477 (A:172, NA:305) | <u>Measure:</u> MPR<br><u>Classification:</u> ( $\geq 80\%$ = adherent, $< 80\%$ = nonadherent)<br><u>Method of Assessment:</u> health claims data                  | Total healthcare costs<br>Inpatient costs<br>Outpatient costs<br>ED costs<br>Pharmacy costs<br>Physician office visit costs<br>Medical costs | <u>Type of Costs:</u> unadjusted<br><u>Classification:</u> disease state specific<br><u>Currency Year:</u> USD, 2013<br><u>Cost of Nonadherence:</u><br>THC:\$16555 (\$16995.62),<br>IC:\$5657 (\$5807.57),<br>OC:\$5594 (\$5742.89),<br>EDC:\$1147 (\$1177.53),<br>PC:\$2365 (\$2427.95),<br>POC:\$1765 (\$1811.98),<br>MC:\$14190 (\$14567.68) | <u>Quality:</u> medium<br><u>Classification:</u> cost description |
| 31<br>32<br>33<br>34<br>35<br>36<br>37<br>38<br>39<br>40<br>41<br>42<br>43<br>44<br>45<br>46<br>47 | <i>Tkacz et al</i> [76]<br>2014<br>US   | To estimate the healthcare service utilisation and costs associated with buprenorphine medication assisted therapy adherence among a sample of opioid dependent | <u>Design:</u> retrospective cohort analysis<br><u>Follow Up:</u> 12 months<br><u>Sample Size:</u> 455 (A:146, NA:309)                                 | <u>Measure:</u> MPR<br><u>Classification:</u> ( $\geq 80\%$ = adherent, $< 80\%$ = nonadherent)<br><u>Method of Assessment:</u> pharmacy claims data                | Total healthcare costs<br>Inpatient costs<br>Outpatient costs<br>ED costs<br>Pharmacy costs                                                  | <u>Type of Costs:</u> adjusted and unadjusted<br><u>Classification:</u> disease state specific<br><u>Currency Year:</u> USD, 2010<br><u>Cost of Nonadherence:</u><br>Adjusted:<br>THC:\$49051 (\$53503.88),<br>IC:\$26470 (\$28872.96),<br>OC:\$14570 (\$15892.67),<br>EDC:\$4439 (\$4841.98),                                                   | <u>Quality:</u> medium<br><u>Classification:</u> cost description |

1  
2  
3 members.

4 PC:\$3581 (\$3906.09)  
5 Unadjusted:  
6 THC:\$47868 (\$52213.49),  
7 IC:\$26043 (\$28407.20),  
8 OC:\$14173 (\$15459.63),  
9 EDC:\$4058 (\$4426.39),  
10 PC:\$3557 (\$3879.91)

11 **Metabolic**  
12 **conditions other**  
13 **than diabetes**  
14 **mellitus**

15 *Lee et al*[77]  
16 2011  
17 US

18 To assess the  
19 relationship between  
20 medication adherence  
21 and healthcare costs  
22 among US patients on  
23 dialysis given  
24 cinacalcet to manage  
25 secondary  
26 hypoparathyroidism.

27 Design: retrospective  
28 cohort study  
29 Follow Up: 12 months  
30 Sample Size: 4923  
31 (A:1372, NA:1304)

32 Measure: MPR  
33 Classification:  
34 ( $\geq 80\%$  = high  
35 adherent,  $< 80\%$  =  
36 low adherent)  
37 Method of  
38 Assessment:  
39 pharmacy claims  
40 data

41 Total costs  
42 Inpatient costs  
43 Outpatient  
44 costs  
45 ED costs  
46 Pharmacy  
47 costs  
48 Other  
49 pharmacy  
50 costs

51 Type of Costs: unadjusted  
52 Classification: all cause and disease  
53 state specific  
54 Currency Year: USD, 2010  
55 Cost of Nonadherence:  
56 All cause:  
57 PC:\$5556 (\$6060.38)  
58 Disease state specific:  
59 TC:\$126996 (\$138524.78),  
60 IC:\$14844 (\$16191.55),  
61 OC:\$101854 (\$111100.37),  
62 EDC:\$734 (\$800.63),  
63 PC:\$3244 (\$3538.49),  
64 OtPC:\$9564 (\$10432.23)

65 Quality: medium  
66 Classification: cost  
67 description

68 **Blood**

69 *Candrilli et al*[78]  
70 2011  
71 US

72 To investigate the  
73 relationships among  
74 hydroxyurea  
75 adherence, healthcare  
76 utilisation and  
77 healthcare costs.

78 Design: retrospective  
79 longitudinal study  
80 Follow Up: 12 months  
81 Sample Size: 312  
82 (A:110, NA:202)

83 Measure: MPR  
84 Classification:  
85 ( $\geq 80\%$  = adherent,  
86  $< 80\%$  =  
87 nonadherent)  
88 Method of  
89 Assessment:

90 Total costs  
91 Inpatient costs  
92 ED costs  
93 Pharmacy  
94 costs  
95 Physician  
96 office visit

97 Type of Costs: adjusted  
98 Classification: all cause and disease  
99 state specific  
100 Currency Year: USD, 2008  
101 Cost of Nonadherence:  
102 All cause:  
103 TC:\$ 20436 (\$22734.83),

104 Quality: medium  
105 Classification: cost  
106 description

1  
2  
3  
4  
5  
6  
7  
8  
9  
10  
11  
12  
13  
14  
15  
16  
17  
18  
19  
20  
21  
22  
23  
24  
25  
26  
27  
28  
29  
30  
31  
32  
33  
34  
35  
36  
37  
38  
39  
40  
41  
42  
43  
44  
45  
46  
47

For peer review only

|                      |                          |                                                                                                                                                                                                                                                                                                                      |
|----------------------|--------------------------|----------------------------------------------------------------------------------------------------------------------------------------------------------------------------------------------------------------------------------------------------------------------------------------------------------------------|
| pharmacy claims data | costs<br>Ancillary costs | IC:\$9780 (\$10880.15),<br>EDC:\$837 (\$931.15),<br>PC:\$2579 (\$2869.11),<br>POC:\$3483 (\$3874.80),<br>AC:\$3911 (\$4350.95)<br>Disease state specific:<br>TC:\$12097 (\$13457.78),<br>IC:\$7315 (\$8137.86),<br>EDC:\$552 (\$614.09),<br>PC:\$158 (\$175.77),<br>POC:\$1865 (\$2074.79),<br>AC:\$2466 (\$2743.40) |
|----------------------|--------------------------|----------------------------------------------------------------------------------------------------------------------------------------------------------------------------------------------------------------------------------------------------------------------------------------------------------------------|

|                                                                               |                                                                                                                                                                          |                                                                                                                                  |                                                                                                                                                                                |                              |                                                                                                                                                                                                             |                                                                                |
|-------------------------------------------------------------------------------|--------------------------------------------------------------------------------------------------------------------------------------------------------------------------|----------------------------------------------------------------------------------------------------------------------------------|--------------------------------------------------------------------------------------------------------------------------------------------------------------------------------|------------------------------|-------------------------------------------------------------------------------------------------------------------------------------------------------------------------------------------------------------|--------------------------------------------------------------------------------|
| <p><b>All</b><br/><i>Alvarez Payero et al</i><br/>[79]<br/>2014<br/>Spain</p> | <p>To determine the profile of patients who are admitted to hospital as a result of non-adherence and to obtain an estimate of the economic impact for the hospital.</p> | <p><u>Design:</u> retrospective observational study<br/><u>Follow Up:</u> 1527 days<br/><u>Sample Size:</u> 87 (A:21, NA:66)</p> | <p><u>Measure:</u> pharmacy records<br/><u>Classification:</u> (&gt;75% = adherent, ≤75% = nonadherent)<br/><u>Method of Assessment:</u> pharmacy and hospital claims data</p> | <p>Hospitalization costs</p> | <p><u>Type of Costs:</u> unadjusted<br/><u>Classification:</u> all cause<br/><u>Currency Year:</u> EUR, 2012<br/><u>Cost of Nonadherence</u><sup>####</sup>:<br/>All cause:<br/>HC:€6275.80 (\$8893.94)</p> | <p><u>Quality:</u> low<br/><u>Classification:</u> cost outcome description</p> |
|-------------------------------------------------------------------------------|--------------------------------------------------------------------------------------------------------------------------------------------------------------------------|----------------------------------------------------------------------------------------------------------------------------------|--------------------------------------------------------------------------------------------------------------------------------------------------------------------------------|------------------------------|-------------------------------------------------------------------------------------------------------------------------------------------------------------------------------------------------------------|--------------------------------------------------------------------------------|

A: adherent, NA: nonadherent, MA: moderate adherence, LA: low adherence, NC: noncompliance, NP: nonpersistent, P: persistent, T: turbulent, NE: no exposure, CHF: chronic heart failure, THC: total healthcare costs, TC: total costs, IC: inpatient costs, OC: outpatient costs, EDC: emergency department visit costs, PC: pharmacy costs, MC: medical costs, HC: hospitalization costs, POC: physician office visit costs, NPC: non-pharmacy costs, AC: ancillary costs, OtPC: other pharmacy costs, PAC: psychiatric assessment costs, TCMC: targeted case management costs, ArC: arrest costs, InC: incarceration costs, RC: radiology costs, SC: services costs, InstC: institutional costs, ESC: external services costs, MSC: medical services costs, PCC: primary care costs, MTC: medical test costs, FC: fracture costs, LC: laboratory costs, IntC: interdisciplinary costs, BHIC: behavioural health inpatient costs, STDC: short term disability costs, WCC: workers compensation costs, PTOC: paid time off costs, TPC: total productivity costs, AbC: absenteeism costs, PrC: presenteeism costs, ACC: acute care

1  
2  
3 costs, OtC: other costs, com: commercial patients, med: Medicare supplemental patients, USD: United States dollar, GBP: Great British Pound, EUR: Euro,  
4 DKK: Danish krone, CAD: Canadian dollar, KRW: South Korean won  
5

6  
7 \*: extrapolated annual cost; \*\*: subgroups averaged; \*\*\*: national estimate of cost; \*\*\*\*: negative value as costs modelled against lowest adherence group;  
8 #: extrapolated annual cost and subgroups averaged; ##: cost represents losses in workplace productivity; ###: negative value as costs modelled against  
9 adherent group; ####: cost per episode of nonadherence  
10  
11  
12  
13  
14  
15  
16  
17  
18  
19  
20  
21  
22  
23  
24  
25  
26  
27  
28  
29  
30  
31  
32  
33  
34  
35  
36  
37  
38  
39  
40  
41  
42  
43  
44  
45  
46  
47

1. Aubert RE, Yao J, Xia F, et al. Is there a relationship between early statin compliance and a reduction in healthcare utilization? *The American journal of managed care* 2010;**16**:459-66
2. Casciano JP, Dotiwala ZJ, Martin BC, et al. The costs of warfarin underuse and nonadherence in patients with atrial fibrillation: a commercial insurer perspective. *Journal of managed care pharmacy : JMCP* 2013;**19**:302-16
3. Dilokthornsakul P, Chaikyunapruk N, Nimpitakpong P, et al. The Effects of Medication Supply on Hospitalizations and Health-Care Costs in Patients with Chronic Heart Failure. *Value in Health* 2012;**15**:S9-S14 doi: 10.1016/j.jval.2011.11.019[published Online First: Epub Date]].
4. Dragomir A, Côté R, Roy L, et al. Impact of adherence to antihypertensive agents on clinical outcomes and hospitalization costs. *Medical care* 2010;**48**:418-25 doi: 10.1097/MLR.0b013e3181d567bd[published Online First: Epub Date]].
5. Dragomir A, Cote R, White M, et al. Relationship between adherence level to statins, clinical issues and health-care costs in real-life clinical setting. *Value in health : the journal of the International Society for Pharmacoeconomics and Outcomes Research* 2010;**13**(1):87-94 doi: 10.1111/j.1524-4733.2009.00583.x[published Online First: Epub Date]].
6. Pittman DG, Chen W, Bowlin SJ, et al. Adherence to statins, subsequent healthcare costs, and cardiovascular hospitalizations. *The American journal of cardiology* 2011;**107**:1662-6 doi: 10.1016/j.amjcard.2011.01.052[published Online First: Epub Date]].
7. Pittman DG, Tao Z, Chen W, et al. Antihypertensive medication adherence and subsequent healthcare utilization and costs. *The American journal of managed care* 2010;**16**:568-76
8. Rizzo JAS, W. R. Variations in compliance among hypertensive patients by drug class: implications for health care costs. *Clinical therapeutics* 1997;**19**(6):1446-57; discussion 24-5
9. Sokol MC, McGuigan KA, Verbrugge RR, et al. Impact of medication adherence on hospitalization risk and healthcare cost. *Medical care* 2005;**43**:521-30
10. Stroupe KT, Teal EY, Tu W, et al. Association of Refill Adherence and Health Care Use Among Adults with Hypertension in an Urban Health Care System. *Pharmacotherapy* 2006;**26**:779-89 doi: 10.1592/phco.26.6.779[published Online First: Epub Date]].
11. Wu J, Seiber E, Lacombe VA, et al. Medical utilization and costs associated with statin adherence in Medicaid enrollees with type 2 diabetes. *The Annals of pharmacotherapy* 2011;**45**:342-9 doi: 10.1345/aph.1P539[published Online First: Epub Date]].
12. Zhao Y, Zabriski S, Bertram C. Associations between statin adherence level, health care costs, and utilization. *Journal of managed care & specialty pharmacy* 2014;**20**:703-13
13. Bagalman E, Yu-Isenberg KS, Durden E, et al. Indirect costs associated with nonadherence to treatment for bipolar disorder. *Journal of occupational and environmental medicine / American College of Occupational and Environmental Medicine* 2010;**52**:478-85 doi: 10.1097/JOM.0b013e3181db811d[published Online First: Epub Date]].
14. Becker MA, Young MS, Ochshorn E, et al. The relationship of antipsychotic medication class and adherence with treatment outcomes and costs for Florida Medicaid beneficiaries with schizophrenia. *Administration and policy in mental health* 2007;**34**:307-14 doi: 10.1007/s10488-006-0108-5[published Online First: Epub Date]].
15. Eaddy M, Grogg A, Locklear J. Assessment of compliance with antipsychotic treatment and resource utilization in a Medicaid population. *Clinical therapeutics* 2005;**27**:263-72 doi: 10.1016/j.clinthera.2005.02.003[published Online First: Epub Date]].



16. Gilmer TP, Dolder CR, Lacro JP, et al. Adherence to treatment with antipsychotic medication and health care costs among Medicaid beneficiaries with schizophrenia. *The American journal of psychiatry* 2004;**161**:692-9
17. Hong J, Reed C, Novick D, et al. Clinical and economic consequences of medication non-adherence in the treatment of patients with a manic/mixed episode of bipolar disorder: results from the European Mania in Bipolar Longitudinal Evaluation of Medication (EMBLEM) study. *Psychiatry research* 2011;**190**:110-4 doi: 10.1016/j.psychres.2011.04.016[published Online First: Epub Date]|.
18. Jiang Y, Ni W. Estimating the Impact of Adherence to and Persistence with Atypical Antipsychotic Therapy on Health Care Costs and Risk of Hospitalization. *Pharmacotherapy* 2015;**35**(9):813-22 doi: 10.1002/phar.1634[published Online First: Epub Date]|.
19. Joe S, Lee JS. Association between non-compliance with psychiatric treatment and non-psychiatric service utilization and costs in patients with schizophrenia and related disorders. *BMC psychiatry* 2016;**16**(1):444 doi: 10.1186/s12888-016-1156-3[published Online First: Epub Date]|.
20. Knapp M, King D, Pugner K, et al. Non-adherence to antipsychotic medication regimens: associations with resource use and costs. *The British journal of psychiatry : the journal of mental science* 2004;**184**:509-16
21. Offord S, Lin J, Mirski D, et al. Impact of early nonadherence to oral antipsychotics on clinical and economic outcomes among patients with schizophrenia. *Advances in therapy* 2013;**30**:286-97 doi: 10.1007/s12325-013-0016-5[published Online First: Epub Date]|.
22. Offord S, Lin J, Wong B, et al. Impact of oral antipsychotic medication adherence on healthcare resource utilization among schizophrenia patients with Medicare coverage. *Community mental health journal* 2013;**49**:625-9 doi: 10.1007/s10597-013-9638-y[published Online First: Epub Date]|.
23. Robertson AG, Swanson JW, Van Dorn RA, et al. Treatment participation and medication adherence: effects on criminal justice costs of persons with mental illness. *Psychiatric services (Washington, DC)* 2014;**65**(10):1189-91 doi: 10.1176/appi.ps.201400247[published Online First: Epub Date]|.
24. Robinson RL, Long SR, Chang S, et al. Higher costs and therapeutic factors associated with adherence to NCQA HEDIS antidepressant medication management measures: analysis of administrative claims. *Journal of managed care pharmacy : JMCP* 2006;**12**:43-54
25. Svarstad BL, Shireman TI, Sweeney JK. Using drug claims data to assess the relationship of medication adherence with hospitalization and costs. *Psychiatric services (Washington, DC)* 2001;**52**:805-11
26. White TJV, Ann; Ory, Caron; Dezii, Christopher M.; Chang, Eunice. Economic Impact of Patient Adherence with Antidepressant Therapy Within a Managed Care Organization. *Disease Management & Health Outcomes* 2003;**11**(12):817-22 doi: 10.2165/00115677-200311120-00006[published Online First: Epub Date]|.
27. An S-Y, Kim HJ, Chun KH, et al. Clinical and economic outcomes in medication-adherent and -nonadherent patients with type 2 diabetes mellitus in the Republic of Korea. *Clinical therapeutics* 2014;**36**:245-54 doi: 10.1016/j.clinthera.2013.12.012[published Online First: Epub Date]|.
28. Buysman EK, Anderson A, Bacchus S, et al. Retrospective Study on the Impact of Adherence in Achieving Glycemic Goals in Type 2 Diabetes Mellitus Patients Receiving Canagliflozin. *Adv Ther* 2017;**34**(4):937-53 doi: 10.1007/s12325-017-0500-4[published Online First: Epub Date]|.
29. Curtis SE, Boye KS, Lage MJ, et al. Medication adherence and improved outcomes among patients with type 2 diabetes. *The American journal of managed care* 2017;**23**(7):e208-e14
30. Egede LE, Gebregziabher M, Dismuke CE, et al. Medication Nonadherence in Diabetes: Longitudinal effects on costs and potential cost savings from improvement. *Diabetes care* 2012;**35**:2533-39 doi: 10.2337/dc12-0572[published Online First: Epub Date]|.

- 1  
2  
3 31. Gentil L, Vasiliadis HM, Preville M, et al. Adherence to Oral Antihyperglycemic Agents Among Older Adults With Mental Disorders and Its Effect on  
4 Health Care Costs, Quebec, Canada, 2005-2008. *Preventing chronic disease* 2015;**12**:E230 doi: 10.5888/pcd12.150412[published Online First: Epub  
5 Date]].
- 6  
7 32. Hagen SE, Wright DW, Finch R, et al. Impact of compliance to oral hypoglycemic agents on short-term disability costs in an employer population.  
8 *Population health management* 2014;**17**:35-41 doi: 10.1089/pop.2013.0009[published Online First: Epub Date]].
- 9  
10 33. Hansen RA, Farley JF, Droege M, et al. A retrospective cohort study of economic outcomes and adherence to monotherapy with metformin,  
11 pioglitazone, or a sulfonylurea among patients with type 2 diabetes mellitus in the United States from 2003 to 2005. *Clinical therapeutics*  
12 2010;**32**:1308-19 doi: 10.1016/j.clinthera.2010.07.011[published Online First: Epub Date]].
- 13  
14 34. Hong JS, Kang HC. Relationship between oral antihyperglycemic medication adherence and hospitalization, mortality, and healthcare costs in adult  
15 ambulatory care patients with type 2 diabetes in South Korea. *Medical care* 2011;**49**:378-84 doi: 10.1097/MLR.0b013e31820292d1[published  
16 Online First: Epub Date]].
- 17  
18 35. Jha AK, Aubert RE, Yao J, et al. Greater adherence to diabetes drugs is linked to less hospital use and could save nearly \$5 billion annually. *Health affairs*  
19 (Project Hope) 2012;**31**:1836-46 doi: 10.1377/hlthaff.2011.1198[published Online First: Epub Date]].
- 20  
21 36. White TJV, Ann; Chang, Eunice; Dezii, Christopher M.; Abrams, Geoffrey D. The Costs of Non-Adherence to Oral Antihyperglycemic Medication in  
22 Individuals with Diabetes Mellitus and Concomitant Diabetes Mellitus and Cardiovascular Disease in a Managed Care Environment. *Disease*  
23 *Management & Health Outcomes* 2004;**12**(3):181-88 doi: 10.2165/00115677-200412030-00004[published Online First: Epub Date]].
- 24  
25 37. Wu N, Chen S, Boulanger L, et al. Duloxetine compliance and its association with healthcare costs among patients with diabetic peripheral neuropathic  
26 pain. *Journal of medical economics* 2009;**12**:192-202 doi: 10.3111/13696990903240559[published Online First: Epub Date]].
- 27  
28 38. Briesacher BA, Andrade SE, Yood RA, et al. Consequences of poor compliance with bisphosphonates. *Bone* 2007;**41**:882-7 doi:  
29 10.1016/j.bone.2007.07.009[published Online First: Epub Date]].
- 30  
31 39. Eisenberg DF, Placzek H, Gu T, et al. Cost and consequences of noncompliance to oral bisphosphonate treatment. *Journal of managed care & specialty*  
32 *pharmacy* 2015;**21**(1):56-65 doi: 10.18553/jmcp.2015.21.1.56[published Online First: Epub Date]].
- 33  
34 40. Halpern R, Becker L, Iqbal SU, et al. The association of adherence to osteoporosis therapies with fracture, all-cause medical costs, and all-cause  
35 hospitalizations: a retrospective claims analysis of female health plan enrollees with osteoporosis. *Journal of managed care pharmacy : JMCP*  
36 2011;**17**:25-39
- 37  
38 41. Hazel-Fernandez L, Louder AM, Foster SA, et al. Association of teriparatide adherence and persistence with clinical and economic outcomes in Medicare  
39 Part D recipients: a retrospective cohort study. *BMC musculoskeletal disorders* 2013;**14**:4 doi: 10.1186/1471-2474-14-4[published Online First: Epub  
40 Date]].
- 41  
42 42. Huybrechts KF, Ishak KJ, Caro JJ. Assessment of compliance with osteoporosis treatment and its consequences in a managed care population. *Bone*  
43 2006;**38**:922-8 doi: 10.1016/j.bone.2005.10.022[published Online First: Epub Date]].
- 44  
45 43. Kjellberg J, Jorgensen AD, Vestergaard P, et al. Cost and health care resource use associated with noncompliance with oral bisphosphonate therapy: an  
46 analysis using Danish health registries. *Osteoporosis International* 2016;**27**(12):3535-41 doi: 10.1007/s00198-016-3683-7[published Online First:  
47 Epub Date]].

- 1
- 2
- 3
- 4 44. Modi A, Siris ES, Tang J, et al. Cost and consequences of noncompliance with osteoporosis treatment among women initiating therapy. *Current medical*
- 5 *research and opinion* 2015;**31**(4):757-65 doi: 10.1185/03007995.2015.1016605[published Online First: Epub Date]].
- 6 45. Olsen KR, Hansen C, Abrahamsen B. Association between refill compliance to oral bisphosphonate treatment, incident fractures, and health care costs--
- 7 an analysis using national health databases. *Osteoporosis international : a journal established as result of cooperation between the European*
- 8 *Foundation for Osteoporosis and the National Osteoporosis Foundation of the USA* 2013;**24**:2639-47 doi: 10.1007/s00198-013-2365-y[published
- 9 *Online First: Epub Date]].*
- 10 46. Sunycz JA, Mucha L, Baser O, et al. Impact of compliance and persistence with bisphosphonate therapy on health care costs and utilization.
- 11 *Osteoporosis international : a journal established as result of cooperation between the European Foundation for Osteoporosis and the National*
- 12 *Osteoporosis Foundation of the USA* 2008;**19**:1421-9 doi: 10.1007/s00198-008-0586-2[published Online First: Epub Date]].
- 13 47. Zhao Y, Johnston SS, Smith DM, et al. Association between teriparatide adherence and healthcare utilization and costs among hip fracture patients in
- 14 the United States. *Bone* 2014;**60**:221-6 doi: 10.1016/j.bone.2013.12.016[published Online First: Epub Date]].
- 15 48. Zhao Y, Johnston SS, Smith DM, et al. Association between teriparatide adherence and healthcare utilization and costs in real-world US
- 16 kyphoplasty/vertebroplasty patients. *Osteoporosis International* 2013;**24**:2525-33 doi: 10.1007/s00198-013-2324-7[published Online First: Epub
- 17 *Date]].*
- 18 49. Davis JR, Wu B, Kern DM, et al. Impact of Nonadherence to Inhaled Corticosteroid/LABA Therapy on COPD Exacerbation Rates and Healthcare Costs in a
- 19 Commercially Insured US Population. *American health & drug benefits* 2017;**10**(2):92-102
- 20 50. Delea TE, Stanford RH, Hagiwara M, et al. Association between adherence with fixed dose combination fluticasone propionate/salmeterol on asthma
- 21 outcomes and costs\*. *Current medical research and opinion* 2008;**24**:3435-42 doi: 10.1185/03007990802557344[published Online First: Epub
- 22 *Date]].*
- 23 51. Diehl JL, Daw JR, Coley KC, et al. Medical utilization associated with palivizumab compliance in a commercial and managed medicaid health plan. *Journal*
- 24 *of managed care pharmacy : JMCP* 2010;**16**:23-31
- 25 52. Joshi AV, Madhavan SS, Ambegaonkar A, et al. Association of medication adherence with workplace productivity and health-related quality of life in
- 26 patients with asthma. *The Journal of asthma : official journal of the Association for the Care of Asthma* 2006;**43**:521-6 doi:
- 27 10.1080/02770900600857010[published Online First: Epub Date]].
- 28 53. Miravittles M, Sicras A, Crespo C, et al. Costs of chronic obstructive pulmonary disease in relation to compliance with guidelines: a study in the primary
- 29 care setting. *Therapeutic advances in respiratory disease* 2013;**7**:139-50 doi: 10.1177/1753465813484080[published Online First: Epub Date]].
- 30 54. Quittner AL, Zhang J, Marynchenko M, et al. Pulmonary medication adherence and health-care use in cystic fibrosis. *Chest* 2014;**146**:142-51 doi:
- 31 10.1378/chest.13-1926[published Online First: Epub Date]].
- 32 55. Carter CT, Waters HC, Smith DB. Impact of infliximab adherence on Crohn's disease-related healthcare utilization and inpatient costs. *Advances in*
- 33 *therapy* 2011;**28**:671-83 doi: 10.1007/s12325-011-0048-7[published Online First: Epub Date]].
- 34 56. Gosselin A, Luo R, Lohoues H, et al. The impact of proton pump inhibitor compliance on health-care resource utilization and costs in patients with
- 35 gastroesophageal reflux disease. *Value in health : the journal of the International Society for Pharmacoeconomics and Outcomes Research*
- 36 2009;**12**:34-9 doi: 10.1111/j.1524-4733.2008.00399.x[published Online First: Epub Date]].
- 37
- 38
- 39
- 40
- 41
- 42
- 43
- 44
- 45
- 46
- 47

- 1  
2  
3  
4  
5  
6  
7  
8  
9  
10  
11  
12  
13  
14  
15  
16  
17  
18  
19  
20  
21  
22  
23  
24  
25  
26  
27  
28  
29  
30  
31  
32  
33  
34  
35  
36  
37  
38  
39  
40  
41  
42  
43  
44  
45  
46  
47
57. Kane SV, Chao J, Mulani PM. Adherence to infliximab maintenance therapy and health care utilization and costs by Crohn's disease patients. *Advances in therapy* 2009;**26**:936-46 doi: 10.1007/s12325-009-0069-7[published Online First: Epub Date] |.
  58. Mitra D, Hodgkins P, Yen L, et al. Association between oral 5-ASA adherence and health care utilization and costs among patients with active ulcerative colitis. *BMC gastroenterology* 2012;**12**:132 doi: 10.1186/1471-230X-12-132[published Online First: Epub Date] |.
  59. Wan GJ, Kozma CM, Slaton TL, et al. Inflammatory bowel disease: healthcare costs for patients who are adherent or non-adherent with infliximab therapy. *Journal of medical economics* 2014;**17**:384-93 doi: 10.3111/13696998.2014.909436[published Online First: Epub Date] |.
  60. Davis KLC, S. D.; Edin, H. M. Prevalence and cost of nonadherence with antiepileptic drugs in an adult managed care population. *Epilepsia* 2008;**49**(3):446-54 doi: 10.1111/j.1528-1167.2007.01414.x[published Online First: Epub Date] |.
  61. Ettinger AB, Manjunath R, Candrilli SD, et al. Prevalence and cost of nonadherence to antiepileptic drugs in elderly patients with epilepsy. *Epilepsy & behavior : E&B* 2009;**14**:324-9 doi: 10.1016/j.yebeh.2008.10.021[published Online First: Epub Date] |.
  62. Faught RE, Weiner JR, Guérin A, et al. Impact of nonadherence to antiepileptic drugs on health care utilization and costs: findings from the RANSOM study. *Epilepsia* 2009;**50**:501-9 doi: 10.1111/j.1528-1167.2008.01794.x[published Online First: Epub Date] |.
  63. Barnett PG, Chow A, Joyce VR, et al. Determinants of the Cost of Health Services Used by Veterans With HIV. *Medical care* 2011;**49**:848-56 doi: 10.1097/MLR.0b013e31821b34c0[published Online First: Epub Date] |.
  64. Cooke CE, Lee HY, Xing S. Adherence to antiretroviral therapy in managed care members in the United States: a retrospective claims analysis. *Journal of managed care pharmacy : JMCP* 2014;**20**:86-92
  65. Pruitt Z, Robst J, Langland-Orban B, et al. Healthcare costs associated with antiretroviral adherence among medicaid patients. *Applied health economics and health policy* 2015;**13**:69-80 doi: 10.1007/s40258-014-0138-1[published Online First: Epub Date] |.
  66. Davis KL, Edin HM, Allen JK. Prevalence and cost of medication nonadherence in Parkinson's disease: evidence from administrative claims data. *Movement disorders : official journal of the Movement Disorder Society* 2010;**25**(4):474-80 doi: 10.1002/mds.22999[published Online First: Epub Date] |.
  67. Delea TE, Thomas SK, Hagiwara M. The association between adherence to levodopa/carbidopa/entacapone therapy and healthcare utilization and costs among patients with Parkinson's disease: a retrospective claims-based analysis. *CNS drugs* 2011;**25**:53-66 doi: 10.2165/11538970-000000000-00000[published Online First: Epub Date] |.
  68. Wei Y-J, Palumbo FB, Simoni-Wastila L, et al. Antiparkinson drug adherence and its association with health care utilization and economic outcomes in a Medicare Part D population. *Value in health : the journal of the International Society for Pharmacoeconomics and Outcomes Research* 2014;**17**:196-204 doi: 10.1016/j.jval.2013.12.003[published Online First: Epub Date] |.
  69. Ivanova JI, Bergman RE, Birnbaum HG, et al. Impact of medication adherence to disease-modifying drugs on severe relapse, and direct and indirect costs among employees with multiple sclerosis in the US. *Journal of medical economics* 2012;**15**:601-9 doi: 10.3111/13696998.2012.667027[published Online First: Epub Date] |.
  70. Tan H, Cai Q, Agarwal S, et al. Impact of adherence to disease-modifying therapies on clinical and economic outcomes among patients with multiple sclerosis. *Advances in therapy* 2011;**28**:51-61 doi: 10.1007/s12325-010-0093-7[published Online First: Epub Date] |.

- 1  
2  
3 71. Zhao Y, Chen S-Y, Wu N, et al. Medication Adherence and Healthcare Costs among Fibromyalgia Patients Treated with Duloxetine. *Pain Practice*  
4 2011;**11**:381-91 doi: 10.1111/j.1533-2500.2010.00431.x[published Online First: Epub Date] | .  
5  
6 72. Darkow T, Henk HJ, Thomas SK, et al. Treatment interruptions and non-adherence with imatinib and associated healthcare costs: a retrospective  
7 analysis among managed care patients with chronic myelogenous leukaemia. *PharmacoEconomics* 2007;**25**:481-96  
8  
9 73. Wu EQ, Johnson S, Beaulieu N, et al. Healthcare resource utilization and costs associated with non-adherence to imatinib treatment in chronic myeloid  
10 leukemia patients. *Current medical research and opinion* 2010;**26**:61-69 doi: 10.1185/03007990903396469[published Online First: Epub Date] | .  
11  
12 74. Leider HL, Dhaliwal J, Davis EJ, et al. Healthcare costs and nonadherence among chronic opioid users. *The American journal of managed care*  
13 2011;**17**:32-40  
14  
15 75. Ruetsch C, Tkacz J, Nadipelli VR, et al. Heterogeneity of nonadherent buprenorphine patients: subgroup characteristics and outcomes. *The American*  
16 *journal of managed care* 2017;**23**(6):e172-e79  
17  
18 76. Tkacz J, Volpicelli J, Un H, et al. Relationship between buprenorphine adherence and health service utilization and costs among opioid dependent  
19 patients. *Journal of substance abuse treatment* 2014;**46**:456-62 doi: 10.1016/j.jsat.2013.10.014[published Online First: Epub Date] | .  
20  
21 77. Lee A, Song X, Khan I, et al. Association of cinacalcet adherence and costs in patients on dialysis. *Journal of medical economics* 2011;**14**:798-804 doi:  
22 10.3111/13696998.2011.627404[published Online First: Epub Date] | .  
23  
24 78. Candrilli SD, O'Brien SH, Ware RE, et al. Hydroxyurea adherence and associated outcomes among Medicaid enrollees with sickle cell disease. *American*  
25 *journal of hematology* 2011;**86**:273-7 doi: 10.1002/ajh.21968[published Online First: Epub Date] | .  
26  
27 79. Alvarez Payero M, Martinez Lopez de Castro N, Ucha Samartin M, et al. Medication non-adherence as a cause of hospital admissions. *Farmacia*  
28 *hospitalaria : organo oficial de expresion cientifica de la Sociedad Espanola de Farmacia Hospitalaria* 2014;**38**(4):328-33 doi:  
29 10.7399/fh.2014.38.4.7660[published Online First: Epub Date] | .  
30  
31  
32  
33  
34  
35  
36  
37  
38  
39  
40  
41  
42  
43  
44  
45  
46  
47

eTable 3: Total cost or total healthcare cost comparison across disease groups

| Disease State                                     | Min adj cost per annum per person | Max adj cost per annum per person | Median adj cost per annum per person | Mean adj cost per annum per person | No. adj studies | Min unadj cost per annum per person | Max unadj cost per annum per person | Median unadj cost per annum per person | Mean unadj cost per annum per person | No. unadj studies | Total studies <sup>1</sup> |
|---------------------------------------------------|-----------------------------------|-----------------------------------|--------------------------------------|------------------------------------|-----------------|-------------------------------------|-------------------------------------|----------------------------------------|--------------------------------------|-------------------|----------------------------|
| Cardiovascular Disease                            | 3347                              | 19472                             | 8080                                 | 9204                               | 6               | 1433                                | 8377.05                             | 5951                                   | 4701                                 | 7                 | 12                         |
| Mental Health                                     | 3253                              | 19363                             | 11262                                | 11052                              | 6               | 2512                                | 25920                               | 17211                                  | 16486                                | 7                 | 14                         |
| Diabetes Mellitus                                 | 2741                              | 9819                              | 6907                                 | 6310                               | 7               | 1142                                | 7950                                | 5534                                   | 4934                                 | 8                 | 11                         |
| Osteoporosis                                      | 949                               | 44190                             | 41402                                | 32866                              | 4               | 669                                 | 43404                               | 9921                                   | 18190                                | 10                | 11                         |
| Respiratory Disease                               | 5701                              | 7124                              | 6689                                 | 6505                               | 1               | 804                                 | 36259                               | 11546                                  | 16124                                | 5                 | 6                          |
| Gastrointestinal Disease                          | 12085                             | 37151                             | 20715                                | 23317                              | 3               |                                     |                                     |                                        |                                      | 2                 | 5                          |
| Epilepsy                                          |                                   |                                   |                                      |                                    | 0               | 1866                                | 22673                               | 18714                                  | 14418                                | 3                 | 3                          |
| HIV/AIDS                                          |                                   |                                   |                                      |                                    | 0               | 16957                               | 30523                               | 23880                                  | 24322                                | 3                 | 3                          |
| Parkinson's Disease                               |                                   |                                   |                                      | 10290*                             | 1               | 10988                               | 52023                               | 36753                                  | 34129                                | 3                 | 3                          |
| Musculoskeletal conditions                        |                                   |                                   |                                      | 25368*                             | 2               |                                     |                                     |                                        | 3408.32*                             | 2                 | 3                          |
| Cancer                                            |                                   |                                   |                                      |                                    | 0               | 48598                               | 162699                              | 93627                                  | 99638                                | 2                 | 2                          |
| Addiction                                         |                                   |                                   |                                      | 53504*                             | 1               | 16996                               | 52213                               | 29406                                  | 32872                                | 3                 | 3                          |
| Metabolic conditions other than diabetes mellitus |                                   |                                   |                                      |                                    | 0               |                                     |                                     |                                        | 138525*                              | 1                 | 1                          |
| Blood conditions                                  |                                   |                                   |                                      | 13458*                             | 1               |                                     |                                     |                                        |                                      | 0                 | 1                          |
| All causes                                        | 5271                              | 52341                             | 17132                                | 21257                              | 14              | 1037                                | 53793                               | 16308                                  | 19352                                | 10                | 30**                       |

Costs reported in \$US2015 dollars

<sup>1</sup>Some studies included both adjusted and unadjusted costs

\*Single total cost/total healthcare cost reported

\*\* In addition to disease-specific studies of the economic impact of medication nonadherence, studies reported the all-causes costs, encompassing cost drivers such as comorbidities. Alvarez Payero et al reported all cause costs only.

Do not report total cost/total healthcare cost

Single total cost/total healthcare cost reported



# PRISMA 2009 Checklist

| Section/topic                      | #  | Checklist item                                                                                                                                                                                                                                                                                              | Reported on page # |
|------------------------------------|----|-------------------------------------------------------------------------------------------------------------------------------------------------------------------------------------------------------------------------------------------------------------------------------------------------------------|--------------------|
| <b>TITLE</b>                       |    |                                                                                                                                                                                                                                                                                                             |                    |
| Title                              | 1  | Identify the report as a systematic review, meta-analysis, or both.                                                                                                                                                                                                                                         |                    |
| <b>ABSTRACT</b>                    |    |                                                                                                                                                                                                                                                                                                             |                    |
| Structured summary                 | 2  | Provide a structured summary including, as applicable: background; objectives; data sources; study eligibility criteria, participants, and interventions; study appraisal and synthesis methods; results; limitations; conclusions and implications of key findings; systematic review registration number. |                    |
| <b>INTRODUCTION</b>                |    |                                                                                                                                                                                                                                                                                                             |                    |
| Rationale                          | 3  | Describe the rationale for the review in the context of what is already known.                                                                                                                                                                                                                              |                    |
| Objectives                         | 4  | Provide an explicit statement of questions being addressed with reference to participants, interventions, comparisons, outcomes, and study design (PICOS).                                                                                                                                                  |                    |
| <b>METHODS</b>                     |    |                                                                                                                                                                                                                                                                                                             |                    |
| Protocol and registration          | 5  | Indicate if a review protocol exists, if and where it can be accessed (e.g., Web address), and, if available, provide registration information including registration number.                                                                                                                               |                    |
| Eligibility criteria               | 6  | Specify study characteristics (e.g., PICOS, length of follow-up) and report characteristics (e.g., years considered, language, publication status) used as criteria for eligibility, giving rationale.                                                                                                      |                    |
| Information sources                | 7  | Describe all information sources (e.g., databases with dates of coverage, contact with study authors to identify additional studies) in the search and date last searched.                                                                                                                                  |                    |
| Search                             | 8  | Present full electronic search strategy for at least one database, including any limits used, such that it could be repeated.                                                                                                                                                                               |                    |
| Study selection                    | 9  | State the process for selecting studies (i.e., screening, eligibility, included in systematic review, and, if applicable, included in the meta-analysis).                                                                                                                                                   |                    |
| Data collection process            | 10 | Describe method of data extraction from reports (e.g., piloted forms, independently, in duplicate) and any processes for obtaining and confirming data from investigators.                                                                                                                                  |                    |
| Data items                         | 11 | List and define all variables for which data were sought (e.g., PICOS, funding sources) and any assumptions and simplifications made.                                                                                                                                                                       |                    |
| Risk of bias in individual studies | 12 | Describe methods used for assessing risk of bias of individual studies (including specification of whether this was done at the study or outcome level), and how this information is to be used in any data synthesis.                                                                                      |                    |
| Summary measures                   | 13 | State the principal summary measures (e.g., risk ratio, difference in means).                                                                                                                                                                                                                               |                    |
| Synthesis of results               | 14 | Describe the methods of handling data and combining results of studies, if done, including measures of consistency (e.g., $I^2$ ) for each meta-analysis.                                                                                                                                                   |                    |

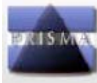

# PRISMA 2009 Checklist

| Section/topic                 | #  | Checklist item                                                                                                                                                                                           | Reported on page # |
|-------------------------------|----|----------------------------------------------------------------------------------------------------------------------------------------------------------------------------------------------------------|--------------------|
| Risk of bias across studies   | 15 | Specify any assessment of risk of bias that may affect the cumulative evidence (e.g., publication bias, selective reporting within studies).                                                             |                    |
| Additional analyses           | 16 | Describe methods of additional analyses (e.g., sensitivity or subgroup analyses, meta-regression), if done, indicating which were pre-specified.                                                         |                    |
| <b>RESULTS</b>                |    |                                                                                                                                                                                                          |                    |
| Study selection               | 17 | Give numbers of studies screened, assessed for eligibility, and included in the review, with reasons for exclusions at each stage, ideally with a flow diagram.                                          |                    |
| Study characteristics         | 18 | For each study, present characteristics for which data were extracted (e.g., study size, PICOS, follow-up period) and provide the citations.                                                             |                    |
| Risk of bias within studies   | 19 | Present data on risk of bias of each study and, if available, any outcome level assessment (see item 12).                                                                                                |                    |
| Results of individual studies | 20 | For all outcomes considered (benefits or harms), present, for each study: (a) simple summary data for each intervention group (b) effect estimates and confidence intervals, ideally with a forest plot. |                    |
| Synthesis of results          | 21 | Present results of each meta-analysis done, including confidence intervals and measures of consistency.                                                                                                  |                    |
| Risk of bias across studies   | 22 | Present results of any assessment of risk of bias across studies (see Item 15).                                                                                                                          |                    |
| Additional analysis           | 23 | Give results of additional analyses, if done (e.g., sensitivity or subgroup analyses, meta-regression [see Item 16]).                                                                                    |                    |
| <b>DISCUSSION</b>             |    |                                                                                                                                                                                                          |                    |
| Summary of evidence           | 24 | Summarize the main findings including the strength of evidence for each main outcome; consider their relevance to key groups (e.g., healthcare providers, users, and policy makers).                     |                    |
| Limitations                   | 25 | Discuss limitations at study and outcome level (e.g., risk of bias), and at review-level (e.g., incomplete retrieval of identified research, reporting bias).                                            |                    |
| Conclusions                   | 26 | Provide a general interpretation of the results in the context of other evidence, and implications for future research.                                                                                  |                    |
| <b>FUNDING</b>                |    |                                                                                                                                                                                                          |                    |
| Funding                       | 27 | Describe sources of funding for the systematic review and other support (e.g., supply of data); role of funders for the systematic review.                                                               |                    |

From: Moher D, Liberati A, Tetzlaff J, Altman DG, The PRISMA Group (2009). Preferred Reporting Items for Systematic Reviews and Meta-Analyses: The PRISMA Statement. PLoS Med 6(7): e1000097. doi:10.1371/journal.pmed1000097

For more information, visit: [www.prisma-statement.org](http://www.prisma-statement.org).



# BMJ Open

## Economic impact of medication nonadherence by disease groups: a systematic review

|                                 |                                                                                                                                                                                                                                                                                                                                                                                                                                                                                                           |
|---------------------------------|-----------------------------------------------------------------------------------------------------------------------------------------------------------------------------------------------------------------------------------------------------------------------------------------------------------------------------------------------------------------------------------------------------------------------------------------------------------------------------------------------------------|
| Journal:                        | <i>BMJ Open</i>                                                                                                                                                                                                                                                                                                                                                                                                                                                                                           |
| Manuscript ID                   | bmjopen-2017-016982.R3                                                                                                                                                                                                                                                                                                                                                                                                                                                                                    |
| Article Type:                   | Research                                                                                                                                                                                                                                                                                                                                                                                                                                                                                                  |
| Date Submitted by the Author:   | 03-Nov-2017                                                                                                                                                                                                                                                                                                                                                                                                                                                                                               |
| Complete List of Authors:       | Cutler, Rachele; University of Technology, Sydney, Australia, Graduate School of Health; Pharmacy<br>Fernandez-Llimos, Fernando; Universidade de Lisboa Instituto de Investigacao do Medicamento, Social Pharmacy<br>Frommer, Michael; University of Sydney Sydney Medical School, Sydney Medical School<br>Benrimoj, Charlie; University of Technology, Sydney, graduate school of health<br>Garcia Cardenas, Victoria; University of Technology, Sydney, Australia, Graduate School of Health; Pharmacy |
| <b>Primary Subject Heading</b>: | Health services research                                                                                                                                                                                                                                                                                                                                                                                                                                                                                  |
| Secondary Subject Heading:      | Global health, Health economics, Health policy, Public health                                                                                                                                                                                                                                                                                                                                                                                                                                             |
| Keywords:                       | Health economics < HEALTH SERVICES ADMINISTRATION & MANAGEMENT, Health policy < HEALTH SERVICES ADMINISTRATION & MANAGEMENT, Quality in health care < HEALTH SERVICES ADMINISTRATION & MANAGEMENT, PUBLIC HEALTH, adherence                                                                                                                                                                                                                                                                               |
|                                 |                                                                                                                                                                                                                                                                                                                                                                                                                                                                                                           |

SCHOLARONE™  
Manuscripts

**Title Page**

**Title:** Economic impact of medication nonadherence by disease groups: a systematic review

**Authors:**

Rachelle L Cutler  
Graduate School of Health  
University of Technology Sydney, Sydney  
Australia

Fernando Fernandez-Llimos  
Research Institute for Medicines (iMed.Ulisboa), Department of Social Pharmacy  
Faculty of Pharmacy, University of Lisbon, Lisbon  
Portugal

Michael Frommer  
Sydney Medical School  
The University of Sydney  
Australia

Shalom I (Charlie) Benrimoj  
Graduate School of Health  
University of Technology Sydney, Sydney  
Australia

Victoria Garcia-Cardenas  
Graduate School of Health  
University of Technology Sydney, Sydney  
Australia

**Corresponding Author:**

Rachelle L Cutler  
Graduate School of Health  
University of Technology Sydney  
City Campus, Broadway, Building 7, Lvl 4, Room 04.02182  
PO Box 123, Broadway NSW 2007 Australia  
rachelle.cutler@uts.edu.au  
+61 2 95147187

**Word Count:**

5961

## Abstract

**Objective:** To determine the economic impact of medication nonadherence across multiple disease groups.

**Design:** Systematic review.

**Evidence Review:** A comprehensive literature search was conducted in PubMed and Scopus in September 2017. Studies quantifying the cost of medication nonadherence in relation to economic impact were included. Relevant information was extracted and quality assessed using the Drummond checklist.

**Results:** Seventy nine individual studies assessing the cost of medication nonadherence across fourteen disease groups were included. Wide scoping cost variations were reported, with lower levels of adherence generally associated with higher total costs. The annual adjusted disease specific economic cost of nonadherence per person ranged from \$949-\$44,190 (in 2015 US dollars). Costs attributed to "all causes" nonadherence ranged from \$5,271 to \$52,341. Medication possession ratio was the metric most utilized to calculate patient adherence, with varying cut-off points defining nonadherence. The main indicators used to measure the cost of nonadherence were total cost or total healthcare cost (83% of studies), pharmacy costs (70%), inpatient costs (46%), outpatient costs (50%), emergency department visit costs (27%), medical costs (29%) and hospitalization costs (18%). Drummond quality assessment yielded 10 studies of high quality with all studies performing partial economic evaluations to varying extents.

**Conclusion:** Medication nonadherence places a significant cost burden on healthcare systems. Current research assessing the economic impact of medication nonadherence is limited and of varying quality, failing to provide adaptable data to influence health policy. The correlation between increased nonadherence and higher disease prevalence should be used to inform policy makers to help circumvent avoidable costs to the healthcare system. Differences in methods make the comparison amongst studies challenging and an accurate estimation of true magnitude of the cost impossible. Standardization of the metric measures used to estimate medication nonadherence and development of a streamlined approach to quantify costs is required.

**Registration:** CRD42015027338

**Strengths and Limitations of this study:**

- This is a novel attempt to use existing studies to broaden the scope of knowledge associated with the economic impact of medication nonadherence via quantifying the cost of medication nonadherence across different disease groups.
- A large comprehensive review – 2,768 citations identified, 79 studies included.
- Inability to perform a meaningful meta-analysis- insufficient statistical data and considerable heterogeneity according to outcome/indicators.
- Robust application of adapted Drummond checklist to evaluate the quality of economic evaluations.

## 1 Introduction

Nearly half of all adults and approximately 8% of children (aged 5-17 years) worldwide have a chronic condition[1]. This, together with ageing populations, is increasing the demand on healthcare resources[2]. Medications represent a cost-effective treatment modality[3], but with estimates of 50% nonadherence to long term therapy for chronic illnesses[4], intentional and unintentional medication nonadherence signifies a prevalent and persistent healthcare problem. Medication adherence is defined as 'the extent to which the patients' behavior matches agreed recommendations from the prescriber', emphasizing the importance on the patients' decisions and highlighting the modifiable aspect of nonadherence[5].

Given the proportion of the population who do not adhere to their medication efforts to improve medication adherence represent an opportunity to enhance health outcomes and health system efficiency. Annual costings of medication nonadherence range from US\$100-\$290 billion[6] in the United States, €1.25 billion[7] in Europe and approximately A\$7 billion[8 9] in Australia. Additionally ten percent of hospitalizations in older adults are attributed to medication nonadherence [10 11] with the typical nonadherent patient requiring three extra medical visits per year leading to \$2000 increased treatment costs per annum[12]. In diabetes the estimated costs savings associated with improving medication nonadherence range from \$661 million to \$1.16 billion [13]. Nonadherence is thus a critical clinical and economic problem[4].

Healthcare reformers and payers have repeatedly relied on cost effectiveness analysis to help healthcare systems deal with the rising costs of care[14]. However there is still a budgetary problem that needs to be considered, especially given the widespread policy debate over how to best bend the healthcare cost curve downward[15] and the proportion of healthcare budgets spent on prescription medication[16]. Quantifying the cost of medication nonadherence will help demonstrate the causal effect between medication nonadherence, increased disease prevalence and healthcare resource use. Justification of the associated financial benefit may incentivize health policy discussion about the value of medication adherence and promote the adoption of medication adherence intervention programs [15].

The objective of this systematic review was, first, to determine the economic impact of medication nonadherence across multiple disease groups, and second, to review and critically appraise the literature to identify the main methodological issues that may explain the differences among reports in the cost calculation and classification of nonadherence.

## 2 Methods

The protocol for this systematic review was registered on the PROSPERO: International prospective register of systematic reviews database (CRD42015027338) and can be accessed at [http://www.crd.york.ac.uk/PROSPERO/display\\_record.asp?ID=CRD42015027338](http://www.crd.york.ac.uk/PROSPERO/display_record.asp?ID=CRD42015027338). The systematic review was undertaken in accordance with PRISMA guidelines[17].

### 2.1 Search strategy and selection criteria

A literature search was conducted in September 2017. Studies reporting the cost of medication nonadherence for any disease state were included. Searches were conducted in PubMed and Scopus. Neither publication date nor language restriction filters were used. The search used in PubMed was: (non-adherence[TIAB]) OR (“Patient Compliance”[MH] AND (“Drug Therapy”[MH]) OR medication[TIAB])) OR “Medication adherence”[MH] AND (costs[TIAB] OR “Costs and Cost Analysis”[MH] OR burden[TIAB]). This was adapted for other databases (eTable 1). Duplicate records were removed.

To identify relevant articles, an initial title and abstract screening was conducted by the lead reviewer (RC) to identify studies appropriate to the study question. This process was over-inclusive. In the second phase appraisal, potentially relevant full text papers were read and excluded based on the following criteria: i) papers not reporting the cost of medication nonadherence as a monetary value, ii) systematic reviews, iii) papers not reporting a baseline cost of medication nonadherence prior to the provision of an intervention and iv) papers not reporting original data. Any uncertainty was discussed amongst two adherence experts (RC and VGC) and resolved via consensus.

### 2.2 Extracted information

A data extraction form was developed based on the Cochrane Handbook for systematic reviews[18] and piloted on a sample of included studies. The extracted information included the source (study identification, citation and title), eligibility (confirmation of inclusion criteria), objective, methods (study design, study groups, year data extracted, follow up period, comparison, adherence measure, adherence data source and adherence definition), population (sample size, setting, country, disease state/drug studied, inclusion/exclusion criteria and perspective), impact/outcome indicators (indicators measured, indicator data source, indicator definitions and characteristics of the method of assessment), results (costs reported, standardized costs, type of costs, non-cost findings, sub-

1  
2  
3 group analysis and statistical significance), conclusions and miscellaneous (funding source,  
4 references to other relevant studies, limitations and reviewers comments).  
5  
6

7 Costs were defined as any indicator associated with medication nonadherence that was quantified  
8 with a monetary value in the original study. This included direct costs (those costs borne by the  
9 healthcare system, community and patients' families in addressing the illness), indirect costs (mainly  
10 productivity losses to society caused by the health problem or disease) and avoidable costs (those  
11 costs incurred for patients suffering complications, resulting from suboptimal medicines use, and  
12 patients with the same disease who experienced no complications). The indicators were grouped for  
13 analysis based on the original studies classification of the cost. All costs were converted to US  
14 dollars (2015 values) using the Cochrane Economics Methods Group - Evidence for Policy and  
15 Practice Information and Coordinating -Centre Cost Converter tool [19], allowing meaningful  
16 comparisons between nonadherence cost data. This online tool uses a two stage computation  
17 process to adjust estimates of costs for currency and/or price year utilizing a Gross Domestic Product  
18 deflator index and Purchasing Power Parities for Gross Domestic Product[19]. The PPP values given  
19 by the International Monetary Fund were chosen. If details of the original price year could not be  
20 ascertained from a study the mid-point year of the study period was used for calculations. The mean  
21 cost was calculated and reported where studies separated out costs for different confounding  
22 factors within the one outcome measure in a disease state. Annual costs were extrapolated from the  
23 original study data if results were not presented in this manner.  
24  
25  
26  
27  
28  
29  
30  
31  
32  
33  
34

35 The definition of medication nonadherence was derived from the included studies; with  
36 nonadherence referring to differing degrees of adherence based on the studies metric of estimation.  
37 Multiple nonadherence costs from individual studies may have been included where further sub-  
38 classification of nonadherence levels was defined. The analysis assessed nonadherence costs within  
39 disease groups, with disease group and cost classification derived from the study. Total healthcare  
40 costs included direct costs to the healthcare system while total costs incorporated direct and indirect  
41 costs.  
42  
43  
44  
45  
46  
47  
48  
49

### 50 **2.3 Quality criteria and economic evaluation classification**

51

52 Economic evaluation requires a comparison of two or more alternative courses of action, while  
53 considering both the inputs and outputs associated with each [20]. All studies were classified in  
54 accordance with Drummond's distinguishing characteristics of healthcare evaluations as either  
55 partial evaluations (outcome description, cost description, cost-outcome description, efficacy or  
56  
57  
58  
59  
60

1  
2  
3 effectiveness evaluation, cost analysis) or full economic evaluations (cost benefit analysis, cost utility  
4 analysis, cost effectiveness analysis, cost minimization analysis) by team consensus (RC and VGC).  
5  
6

7 The Drummond checklist [21] for economic evaluation was used to assess the quality of studies. The  
8 original checklist was modified to remove inapplicable items (4, 5, 12, 14, 15, 30 and 31) as no full  
9 economic evaluation met all inclusion criteria. A score of 1 was assigned if the study included the  
10 required item and zero if it did not with a maximum potential score of 28. The study was classified as  
11 high quality if at least 75% of Drummond's criteria were satisfied, medium quality if 51-74% were  
12 satisfied and low quality if 50% of the criteria or less were satisfied.  
13  
14  
15  
16  
17  
18  
19

## 20 **2.4 Meta-Analysis**

21  
22 Outcome/indicator costs were independently extracted utilizing predesigned data extraction forms  
23 (total healthcare costs, total costs, inpatient costs, outpatient costs, pharmacy costs, medical costs,  
24 emergency department costs, and hospitalisation costs) for the purpose of integrating the findings  
25 on the cost of medication nonadherence to pool data and increase the power of analysis.  
26  
27  
28  
29  
30  
31  
32  
33  
34  
35  
36  
37  
38  
39  
40  
41  
42  
43  
44  
45  
46  
47  
48  
49  
50  
51  
52  
53  
54  
55  
56  
57  
58  
59  
60



### 3 Results

#### 3.1 Study Selection

Search strategies retrieved 2768 potential articles after duplicates were removed. Two hundred and eighty nine articles were selected for full text review. Seventy nine studies were included in the review (Figure 1). Numerous other papers do discuss nonadherence costs however addressed tangential issues or did not present primary relevant data. Many studies failed to report the monetary value of medication nonadherence associated with a range of cost estimate indicators.

#### 3.2 Characteristics of individual studies

Sixty-six studies (83%) were conducted in the United States[10 22-86], four in Europe[87-90], four in Asia[91-94], three in Canada[95-97], one in the United Kingdom[98] and one across multiple countries throughout Europe and the United Kingdom[99]. Publication years ranged from 1997 to 2017; in accordance with the Cochrane Handbook for Systematic Reviews no date restriction filters were used[18] with earlier studies following the same pattern of association between medication nonadherence and increasing healthcare costs. Individual studies reported a large variety of costs, calculated by varying means. Forty-four studies (56%) reported unadjusted costs[22 26 27 30 32-36 38-43 46 48-50 52-56 58 63-68 72 75 81-83 86 88-90 92-94 99], 21 (26%) adjusted costs[10 23-25 29 31 44 51 57 59-61 71 73 76-78 84 85 87 91], 11 a combination of adjusted and unadjusted[28 37 45 47 62 69 70 74 79 80 97], two unadjusted and predicted[95 96] and one predicted costs[98]. The method of determining nonadherence ranged significantly between studies with majority of papers utilizing pharmacy and/or healthcare claims data (97%)[10 22-29 31-52 55 57 59-88 92-97]. Some studies utilized a combination of surveys or questionnaires, observational assessment, previous study data and disease state specific recommended guidelines. Medication possession ratio (MPR) was the most utilized method to calculate patient nonadherence with 51 studies (63%) reporting nonadherence based on this measure[24 25 28 29 32-36 40-44 46 47 49-51 55 57 58 60-64 67-78 81 82 86-88 92-97]; however, the cut-off points to define medication nonadherence differed with some studies classifying nonadherence as less than 80% medication possession and others through sub-classification of percentage ranges (e.g., 0-20%, 20-40%, 40-60%, 60-80%, 80-100%). The proportion of days covered (PDC) was the next most common measure of nonadherence (11%)[31 37 45 48 52 79 80 83-85], with all other studies utilizing an array of measures including self-report[98], urine testing[56], observational assessment[99], time to discontinuation[59], cumulative possession

1  
2  
3 ratio[23], disease specific medication management guidelines[66 89], Morisky 4-Item scale[53],  
4 medication gaps[38], prescription refill rates[22 27] and medication supplies[10]. The main  
5 characteristics of the included studies are summarized in eTable 2.  
6  
7  
8  
9

### 10 **3.3 Quality assessment and classification of economic evaluations**

11 The quality assessment of economic evaluations yielded 10 studies of high[33 37 40 50 51 57 71 75  
12 87 93], 59 of medium[10 22-26 28-32 34-36 38 39 41-48 53-56 58 59 61-64 66 67 69 70 72 73 76-82  
13 84-86 88 89 91 94-99] and ten of low quality[27 49 60 65 68 74 83 90 92]. Scores ranged from 26.1%  
14 to 87.5% (mean 62.63%). Only one study identified the form of economic evaluation used and  
15 justified it in relation to the questions that were being addressed [71]. The item 'the choice of  
16 discount rate is stated and justified' was applicable only to studies covering a time period of more  
17 than one year; all studies that cover more than one year failed to identify or explain why costs had  
18 not been discounted. Details of the analysis and interpretation of results were lacking in the majority  
19 of studies resulting in medium or low quality scores.  
20  
21  
22  
23  
24  
25  
26  
27

28 Through utilization of Drummond's distinguishing characteristics of healthcare evaluations  
29 criteria[20] it is apparent that no full economic evaluation was conducted in any of the included  
30 studies. All studies performed partial economic evaluations of varying extents. The classification of  
31 economic evaluations resulted in 59 cost description studies (74% of those included), 15 cost  
32 outcome descriptions and five cost analysis studies (eTable 2).  
33  
34  
35  
36  
37  
38  
39

### 40 **3.4 Medication nonadherence and costs**

41 The cost analysis of studies (figure 2 and figure 3) reported annual medication nonadherence costs  
42 incurred by the patient per year. The adjusted total cost of nonadherence across all disease groups  
43 ranged from \$949 to \$52,341, while the unadjusted total cost ranged from \$669 to \$162,699. Figure  
44 2 and figure 3 highlight the minimum, maximum and interquartile range of annual costs incurred by  
45 patients across disease groups where three or more studies were included for review. All cause costs  
46 encompass nonadherence costs incurred in mixed disease state studies, taking into account other  
47 confounding factors such as comorbidities.  
48  
49  
50  
51  
52  
53

54 Many different indicators were used to estimate medication nonadherence costs with no clear  
55 definition of what was incorporated in each cost component. The composition of included costs to  
56 estimate total cost or total healthcare cost varied significantly between studies thus indicators were  
57  
58  
59  
60

1  
2  
3 grouped for analysis based on the original studies classification of the cost. The main ones were total  
4 cost or total healthcare cost (83%), pharmacy costs (70%), outpatient costs (50%), inpatient costs  
5 (46%), medical costs (29%), emergency department costs (27%), and hospitalization costs (18%)  
6 (eTable 2). Avoidable costs (e.g., unnecessary hospitalizations, physician office visits and healthcare  
7 resource utilization) were not well defined with majority of studies failing to quantify these costs.  
8  
9

10  
11 Lower levels of adherence across all measures (e.g., MPR, PDC) were generally associated with  
12 higher total costs. From those that reported total or total healthcare costs, 39 studies (49%)  
13 reported nonadherence costs to be greater than adherence costs[24 25 27 29 31 32 34 37-39 42 43  
14 47 49 50 55 56 58 61-65 70-78 84 86 87 96-99] and 11 studies (15%) reported nonadherence costs to  
15 be less than adherence costs[23 26 36 44 59 63 66 81 92 94 95]. Four reported fluctuating findings  
16 based on varying nonadherence cost subcategories[33 48 67 93] and two studies reported  
17 conflicting findings between adjusted and unadjusted costs [79 80]. Higher all cause total  
18 nonadherence costs and lower disease group specific nonadherence costs were reported in four  
19 studies[41 68 85 91], whereas Hansen et al[47] reported all cause total nonadherence costs to be  
20 lower (\$18540 vs. \$52302) but disease group specific nonadherence total costs to be higher (\$3,879  
21 vs. \$2,954).  
22  
23

24  
25 The association between nonadherence and cost was determined through use of a variety of scaling  
26 systems. The most utilized methods were MPR and PDC. These measures could then further be sub-  
27 categorized based on the percentage of adherence/nonadherence. The 80-100% category was  
28 classified as the most adherent group across both scales, with the most common definition of  
29 nonadherence being <80% MPR or PDC.  
30  
31

### 32 33 34 35 36 37 38 39 40 41 42 **3.5 Cost of medication nonadherence via disease group**

43  
44 Cancer exhibited more than double the cost variation of all other disease groups (\$114,101).  
45 Osteoporosis (\$43,240 vs. \$42,734), diabetes mellitus (\$7,077 vs. \$6,808) and mental health  
46 (\$16,110 vs. \$23,408) cost variations were similar between adjusted and unadjusted costs while  
47 cardiovascular disease adjusted costs were more than double unadjusted costs (\$16,124 vs. \$6,943).  
48 Inpatient costs represented the greatest proportion of costs contributing to total costs and/or total  
49 healthcare costs for cardiovascular disease, diabetes mellitus, osteoporosis, mental health, epilepsy  
50 and parkinson's disease. HIV/AIDS, cancer and gastrointestinal disease groups highest proportion of  
51 costs were attributed to pharmacy costs while outpatient costs were greatest in musculoskeletal  
52  
53  
54  
55  
56  
57  
58  
59  
60

1  
2  
3 conditions. Direct costs had greater economic bearing than indirect costs across all disease groups.  
4  
5 Cost comparisons across disease groups are summarized in eTable 3.  
6

### 7 **3.5.1 Cardiovascular Disease**

8  
9 Twelve studies measured the economic impact of medication nonadherence in cardiovascular  
10 disease [10 24 31 61 62 65 67 76 81 93 95 96]. Six studies reported adjusted costs [10 24 31 61 62  
11 76] with annual costs being extrapolated for two of these[31 61]. Total healthcare costs and/or total  
12 costs were assessed in all of the studies with the major indicators measured including pharmacy  
13 costs[10 31 61 62 76], medical costs[10 24 31 61 76] and outpatient costs[31 62]. The annual  
14 economic cost of nonadherence ranged from \$3,347 to \$19,472. Sokol et al[10] evaluated the  
15 economic impact of medication nonadherence across three cardiovascular conditions; hypertension,  
16 hypercholesterolemia and chronic heart failure. For all three cardiovascular conditions examined,  
17 pharmacy costs were higher for the 80-100% adherent group than for the less adherent groups.  
18 Total costs and medical costs were lower for the adherent groups of hypertension and  
19 hypercholesterolemia patients. However, for chronic heart failure patients, total costs and medical  
20 costs were lower for the 1-19% and 20-39% adherent groups than for the 80-100% adherent groups.  
21  
22

23  
24 Unadjusted costs were measured in six studies with the annual total healthcare costs and/or total  
25 costs of nonadherence ranging from \$1,433 to \$8,377 [65 67 81 93 95 96]. Rizzo et al[65] reported  
26 cost findings through subgroup analysis of five conditions. For all conditions the total healthcare  
27 costs were higher for nonadherent groups compared with adherent. While Zhao et al[81],  
28 categorized participants into adherence subgroups; finding that total healthcare costs were lower  
29 for the nonadherent population. The remaining studies used five key indicators to determine the  
30 economic impact: inpatient costs[67 93], outpatient costs[67 93], pharmacy costs[67 95 96], medical  
31 costs[95 96] and hospitalization costs[95 96].  
32  
33  
34  
35  
36  
37  
38  
39  
40  
41  
42

### 43 **3.5.2 Mental Health**

44  
45 The analyses used to report the economic impact of medication nonadherence in mental health  
46 varied widely. Eleven of 14 studies provided a total nonadherence cost estimate in mental health[23  
47 25 27 52 59 66 73 82 91 98 99], with annual cost data being extrapolated for four of these[27 66 82  
48 99]. Six studies used adjusted costs, finding that the total annual cost of nonadherence per patient  
49 ranged from \$3,252 to \$19,363 [23 25 59 60 73 91]. Bagalman et al[25] focused primarily on the  
50 indirect costs associated with nonadherence – short-term disability, workers compensation and paid  
51 time off costs while Robertson et al[82] highlighted the association between medication  
52 nonadherence and incarceration, with findings indicating incarceration and arrest costs are higher  
53  
54  
55  
56  
57  
58  
59  
60

1  
2  
3 for worsening degrees of nonadherence. All other studies addressed direct costs. The main  
4 indicators used to measure the direct economic impact of medication nonadherence were pharmacy  
5 costs[23 39 52 59 60 66 73 99], inpatient costs[39 60 66 98 99], outpatient costs[23 39 59 66 99] and  
6 hospitalization costs[22 23 59 99].  
7  
8

9  
10 The total unadjusted cost for medication nonadherence ranged from \$2,512 to \$25,920 as reported  
11 in four studies [52 66 82 99]. Becker et al[27] used a subgroup analysis to classify patients based on  
12 their adherence level. For every 25% decrement in the rate of adherence (75-100%, 50-74%, 25-49%,  
13 <25%), nonadherence total costs increased. The negligible adherence group (<25%) incurred annual  
14 costs that were \$3,018 more than those of the maximal adherence group (75-100%).  
15  
16

17  
18 Knapp et al[98] outlined the predicted cost of nonadherence with reference to relative impact and  
19 other factors associated with resource use and costs in patients with schizophrenia. Total costs  
20 (\$116,434) were substantially higher than the other two indicators, which were inpatient costs  
21 (\$13,577) and external services costs (\$3,241).  
22  
23

### 24 **3.5.3 Diabetes mellitus:**

25  
26  
27  
28  
29 Eleven studies reported a cost measurement of the impact of medication nonadherence with  
30 reference to the health system and the individual[40 45 47 51 74 76 83 84 92 94 97]. One study  
31 estimated that the total US cost attributable to nonadherence in diabetes was slightly over \$5  
32 billion[51]. Five studies reported the adjusted total healthcare costs and/or total costs with annual  
33 costs per patient ranging from \$2,741 to \$9,819 [47 51 74 76 84 97]. One study reported total costs  
34 in relation to subgroup analysis based on MPR level[74], and another reported total healthcare costs  
35 through subgroup analysis of commercially insured and Medicare supplemental patients[76]. Curtis  
36 et al[84] utilized a diabetic population to report all cause costs, with nonadherence costs being  
37 higher than adherence costs across all outcome indicators bar pharmacy costs.  
38  
39

40  
41  
42  
43  
44 A further four studies reported unadjusted cost findings[40 83 92 94] with an additional four studies  
45 reporting unadjusted costs in combination with adjusted values[45 47 74 97]. Unadjusted total  
46 healthcare costs and/or total costs ranged from \$1,142 to \$7,951. Extrapolated annual costs were  
47 determined for two studies based on cost data presented [40 94].  
48  
49

50  
51  
52 The most prominent indicators used to determine costs were pharmacy costs[40 45 47 74 76 83 84  
53 97], outpatient costs[40 47 76 84 94 97], inpatient costs[47 76 97] and hospitalization costs[51 92  
54 94]. All studies assessed the direct costs associated with medication nonadherence. One study  
55 evaluated the relationship between nonadherence and short term disability costs in addition to  
56 assessing direct costs[45].  
57  
58  
59  
60

### 3.5.4 Osteoporosis:

The cost of medication nonadherence in relation to osteoporosis was predominately examined through analysis of the direct costs associated with nonadherence using total healthcare costs and/or total costs, inpatient costs, outpatient costs, pharmacy costs and emergency department costs. Two studies further assessed the economic impact of nonadherence through evaluation of fracture related costs [48 88]. Four out of 11 studies reported the adjusted cost of medication nonadherence in addition to reporting unadjusted costs [28 79 80 87]. Three studies further classified nonadherence through subgroup analysis, with Briesacher et al[28] using MPR 20% interval increases and the two studies conducted by Zhao et al[79 80] using PDC, with  $\geq 80\%$  classified as high adherence, 50-79% medium adherence and  $< 50\%$  low adherence. In the studies conducted by Zhao et al[79 80], total healthcare costs were highest for the medium adherence group (\$41,402 and \$44,190) followed by the highest adherence group (\$37,553 and \$43,863), and lowest for the low adherence group (\$34,019 and \$43,771). These annual costs were extrapolated from study data. In contrast, Briesacher et al[28] modelled the subgroup analyses against the lowest adherence group ( $< 20\%$  MPR), finding that costs decreased as adherence increased.

Overall, the unadjusted total healthcare costs and/or total costs of nonadherence ranged from \$669 to \$43,404. Studies that further classified patients based on subgroups had the wider cost ranges. In the three studies that reported the lowest level of nonadherence to be PDC  $< 50\%$ , the cost of this category ranged from \$16,938 to \$43,404 [48 79 80].

One study examined only the medical costs of nonadherence through MPR subgroup analysis in commercial and Medicare supplemental populations. The findings were that, for all levels of nonadherence, costs of nonadherence were higher for Medicare supplemental patients [46].

### 3.5.5 Respiratory Disease:

The majority of studies reported unadjusted cost of medication nonadherence, with significant variation in the method of adherence classification[36 38 53 64 89]. Two studies used MPR[36 64], one the Morisky 4-Item scale[53], one the Global Initiative for Chronic Obstructive Lung Disease (GOLD) 2007 Guidelines[89] and one a 37 day gap in claims data[38]. Joshi et al[53] reported on the indirect costs of medication nonadherence through consideration of losses in total productivity costs, absenteeism costs and presenteeism costs, while all remaining studies examined direct costs. Delea et al[36] reported a direct relationship between decreases in medication nonadherence level and total costs, whereas Quittner et al[64] reported an inverse relationship between decreases in medication nonadherence level and total healthcare cost. The total expenses associated with the

1  
2  
3 lowest subgroup of adherence across all measures ranged from \$804 to \$36,259. In contrast Davis et  
4 al[85] utilized adjusted costs across four sub-classifications of PDC adherence ranges to demonstrate  
5 that nonadherence costs were lower than adherence costs in all costing outcomes reported except  
6 hospitalization costs .  
7  
8

### 9 10 **3.5.6 Gastrointestinal Disease:**

11  
12 Three of five studies reported the adjusted annual cost of medication nonadherence per patient  
13 utilizing the MPR method [44 57 71]. Of these, two reported the total cost (\$12,085 and \$37,151)[44  
14 71] with the main contributors to the overall total cost being inpatient costs (22% and 37%),  
15 outpatient costs (57% and 17%) and pharmacy costs (20% and 45%).  
16  
17

18  
19 The remaining two studies utilized infusion rates to assess nonadherence with neither reporting the  
20 total cost nor total healthcare costs[30 54]. Carter et al[30] reported hospitalization costs to be  
21 \$42,854 while Kane et al[54] reported a significantly lower cost at \$5,566 in addition to other direct  
22 cost contributors.  
23  
24

### 25 26 27 **3.5.7 Epilepsy:**

28  
29 Three studies reported the economic impact of medication nonadherence in epilepsy. All reported  
30 unadjusted costs using an MPR cut off of <80%[35 42 43]. The main economic indicators used to  
31 assess total costs were inpatient costs (\$2,289 to \$6,874), emergency department visit costs (\$331  
32 to \$669) and pharmacy costs (\$442 to \$1,067). Davis et al[35] modelled the costs of the  
33 nonadherent group against the adherent group. The annual costs reported by Faught et al[43] were  
34 extrapolated from original cost data. The total cost of nonadherence in epilepsy ranged from \$1,866  
35 to \$22,673.  
36  
37

### 38 39 40 41 **3.5.8 HIV/AIDS:**

42  
43 The economic impact of medication nonadherence for HIV and AIDS patients reported amongst all  
44 three studies was similar [26 32 63]. Two of the three studies examined the costs only for HIV[26  
45 32], while Pruitt et al[63] assessed the cost in AIDS as well as HIV. The total unadjusted costs for  
46 nonadherent HIV patients ranged from \$16,957 to \$30,068 with one study further categorizing  
47 patients with HIV as having either a high viral load or low viral load[26]. The total cost of  
48 nonadherence in AIDS was \$30,523[63]. All studies used comparable indicators (total cost, inpatient  
49 cost, outpatient cost, pharmacy cost) to determine the cost of nonadherence.  
50  
51  
52  
53  
54  
55  
56  
57  
58  
59  
60

### 3.5.9 Parkinson's Disease:

The direct costs associated with Parkinson's disease were assessed in all three studies. The unadjusted total cost ranged from \$10,988 to \$52,023 [34 37 72]. Wei et al[72] further sub-grouped patients into MPR adherence percentage categories, and found that costs increased in all economic indicators (inpatient costs and outpatient costs) as adherence decreased, except for pharmacy costs which decreased with nonadherence. One study additionally reported the adjusted cost, estimating that \$10,290 could be attributed to medication nonadherence annually[37].

### 3.5.10 Musculoskeletal Conditions:

Differing subgroup analyses was used to measure the impact of medication nonadherence on the annual cost incurred by patients. One study assessed both the direct and indirect costs of nonadherence[50], one assessed only the medical costs[69] and one examined the direct costs in commercial and Medicare supplemental patient populations[78]. Zhao et al[78] reported the adjusted annual cost in the commercial population to be \$22,609, and in the Medicare supplemental group, \$28,126. Ivanova et al[50] reported only unadjusted costs and the annual total cost of \$3,408. This figure was extrapolated from study data provided. The main indicators used to evaluate the economic impact of nonadherence were inpatient costs, outpatient costs, pharmacy costs and medical costs. Outpatient costs made the largest contribution to the overall total.

### 3.5.11 Cancer:

Two studies evaluated the effects of medication nonadherence in cancer[33 75]. One study reported total annual costs of \$119,416[75], while the other gave a subgroup analysis based on classified adherence levels[33]. In general the lowest two adherence subgroups (<50% and 50-90%) reported the highest total healthcare costs (\$162,699 and \$67,838). This trend followed for inpatient costs, outpatient costs and other costs, but the reverse relationship was found for pharmacy costs.

### 3.5.12 Addiction:

The adjusted annual total healthcare cost of medication nonadherence was reported as \$53,504[56] while the unadjusted cost ranged from \$16,996 to \$52,213 [56 70 86]. Leider et al[56] reported the main contributors to this cost to be outpatient costs (\$10,829) and pharmacy costs (\$8,855), whereas Tkacz et al[70] and Ruetsch et al[86] reported them to be inpatient costs (\$28,407 and \$5,808) and outpatient costs (\$15,460 and \$5,743).



### 3.5.13 Metabolic conditions other than diabetes mellitus:

One study measured the influence of medication nonadherence on direct healthcare costs in metabolic conditions, reporting an unadjusted attributable total cost of \$138,525[55]. The economic indicators used to derive this cost were inpatient costs (\$16,192), outpatient costs (\$111,100), emergency department visit costs (\$801) and pharmacy costs (\$3,538).

### 3.5.14 Blood conditions:

Candrilli et al[29] reported cost findings on the relationship between nonadherence and healthcare costs, giving an adjusted total cost estimate of \$13,458 for nonadherence classified as MPR <80%.

### 3.5.15 All causes:

In addition to disease-specific studies of the economic impact of medication nonadherence, 28 studies reported the all-causes costs, encompassing cost drivers such as comorbidities. In seven of these studies, annual costs were extrapolated from the original data[47 50 61 64 66 85 99]. Eleven studies reported on economic indicators without giving total cost or total healthcare cost[22 45 46 54 55 57 60 81 83 90 99], and one study reported on costs per episode of nonadherence[90] .

The adjusted cost of medication nonadherence was reported in 14 studies with an estimated range of \$5,271 to \$52,341 [10 29 31 57 59-61 71 76 77 84 85 87 91]. Sokol et al[10] reported the all-cause cost of nonadherence through subgroup analysis of disease states and MPR levels, while Pittman et al[61] reported only using MPR level breakdown.

Fifteen studies reported the unadjusted economic impact of medication nonadherence with an estimated range of \$1,037 to \$53,793 [22 41 46 50 54 55 58 64-66 68 81 83 90 99]. A further four studies reported adjusted and unadjusted costs[37 45 47 97]. The most frequent indicators used to measure the economic impact were total healthcare costs and/or total costs (71%), pharmacy costs (75%), inpatient costs (46%), outpatient costs (46%), medical costs (28%) and emergency department visit costs (25%).

1  
2  
3  
4  
5  
6  
7  
8  
9  
10  
11  
12  
13  
14  
15  
16  
17  
18  
19  
20  
21  
22  
23  
24  
25  
26  
27  
28  
29  
30  
31  
32  
33  
34  
35  
36  
37  
38  
39  
40  
41  
42  
43  
44  
45  
46  
47  
48  
49  
50  
51  
52  
53  
54  
55  
56  
57  
58  
59  
60

### 3.6 Meta-Analysis

Statistical analysis was attempted to collate the large collection of results from individual studies for the purpose of integrating the findings on the cost of medication nonadherence. However, the criterion for a meta-analysis could not be met due to the heterogeneity in study design and lack of required statistical parameters in particular standard deviation[100]. Combining studies that differ substantially in design and other factors would have yielded meaningless summary results.

For peer review only

#### 4 Discussion

This systemic review broadens the scope of knowledge associated with the economic impact of medication nonadherence across different disease groups while building upon previous reviews where greater focus was on targeting overall risk factors or conceptual issues associated with medication nonadherence. Medication nonadherence was generally associated with higher healthcare costs. A large variety of outcomes were used to measure the economic impact including total cost or total healthcare cost, pharmacy costs, inpatient costs, outpatient costs, emergency department costs, medical costs and hospitalization costs.

The costs reported reflect the annual economic impact to the health system per patient. None of the studies estimated broader economic implications such as avoidable costs arising from higher disease prevalence with studies failing to quantify avoidable costs separately to direct and indirect costs possibly due to coding restraints in healthcare claims databases. The majority of studies took the patient or healthcare provider perspective, estimating additional costs associated with nonadherence when compared with adherence. Current literature identifies and quantifies key disease groups that contribute to the economic burden of nonadherence, but no research has attempted to synthesize costs across disease states within major healthcare systems. Comparisons across disease groups would benefit the development of health planning and policy yet prove problematic to interpret due to the varying scope of their inclusion (e.g., mental health vs. parkinsons disease). Similarly there is substantial variation in the differential cost of adherence amongst disease groups with certain diseases requiring greater cost inputs (e.g., cancer and supportive care costs). Further exploration of nonadherence behavior and associated costs is required to adequately quantify the overall cost of nonadherence to healthcare systems as the available data are subject to considerable uncertainty. Given the complexity of medication nonadherence in terms of varying study designs, methods of estimation and adherence definitions there is a limitation as to the ability to truly estimate costs attributed to nonadherence until further streamlined processes are defined.

Significant differences existed in the range of costs reported within and amongst disease groups. No consistent approach to the estimation of costs or levels of adherence has been established. Many different cost indicators were used, with few studies defining exactly what that cost category incorporated, so it is not surprising that cost estimates spanned wide ranges. Prioritization of healthcare interventions to address medication nonadherence is required to address the varying economic impact across disease groups. Determining the range of costs associated with medication nonadherence facilitates the extrapolation of annual national cost estimates attributable to

1  
2  
3 medication nonadherence thus enabling greater planning in terms of health policy to help  
4 counteract increasing avoidable costs.  
5

6  
7 The economic, clinical and humanistic consequences of medication nonadherence will continue to  
8 grow as the burden of chronic diseases grows worldwide. Evolution of health systems must occur to  
9 adequately address the determinants of adherence through utilization of effective health  
10 interventions. Haynes et al [101] highlights that “increasing the effectiveness of adherence  
11 interventions may have a far greater impact on the health of the population than any improvement  
12 in specific medical treatments”. Improving medication adherence provides an opportunity for major  
13 cost savings to healthcare systems. Predictions of population health outcomes through utilization of  
14 treatment efficacy data need to be used in conjunction with adherence rates to inform planning and  
15 project evaluation[4]. The correlation between increased nonadherence and higher disease  
16 prevalence should be used to inform policy makers to help circumvent avoidable costs to the  
17 healthcare system.  
18  
19

20  
21 The metric of adherence estimation varied substantially within and across disease groups; likely  
22 affecting the comparisons between studies. However, Hess et al [102], who compared six key  
23 adherence measures on the same study participants, found that the measures produced similar  
24 adherence values for all participants, although PDC and continuous measure of medication gaps  
25 produced slightly lower values. While this highlights the comparability of the measures of  
26 medication nonadherence, it further justifies the need to agree on consistent methods for  
27 estimating nonadherence through use of pharmacy claims data.  
28  
29

30  
31 MPR was the most commonly used measure to estimate medication nonadherence. MPR was used  
32 in 63% of studies, followed by PDC, which was used in 11%. These percentages were consistent with  
33 those found recently by Sattler et al [103]. Even though the measures of medication nonadherence  
34 may be comparable, the definition of MPR and the cut-off points to define nonadherence differed  
35 significantly. Dragomir et al[95] defined MPR as the total days’ supply of medication dispensed in the  
36 period, divided by the follow up period, with the assumption of 100% adherence during  
37 hospitalization; Wu et al[76] removed the number of hospitalized days from the calculation; and  
38 Pittman et al[61] calculated the total number of days between the dates of the last filling of a  
39 prescription in the first six months in a given year and the first filling of a prescription in the 365 days  
40 before the last filling. Nonadherence could also be further classified into subcategories within MPR  
41 and PDC based on percentages. Thirty studies defined nonadherence as  $MPR < 80\%$ , and 12 studies  
42 categorized nonadherence into varying percentage subgroups. While Karve et al[104] validated the  
43 empirical basis for selecting 80% as a reasonable cut-off point based on predicting subsequent  
44  
45  
46  
47  
48  
49  
50  
51  
52  
53  
54  
55  
56  
57  
58  
59  
60

1  
2  
3 hospitalizations in patients across a broad array of chronic diseases, 76 of the 79 studies included in  
4 this review examined more than just hospitalization costs as an indicator metric. Further research is  
5 required to identify and standardize nonadherence thresholds using other outcomes such as  
6 laboratory, productivity and pharmacy measures.  
7  
8

9  
10 Within the 79 studies covered, 35 different indicators were used to measure the cost of  
11 nonadherence and 19 reporting styles were identified. Because of the resultant heterogeneity, a  
12 meta-analysis was impossible. It is imperative that a standardized approach be established to  
13 measure and report the economic impact of medication nonadherence. The core outcome set must  
14 take into consideration the perspective of the intended audience and the proportion of  
15 nonadherence cost that is attributable to each outcome to determine an appropriate model[105].  
16 The critical indicators based on the findings of this review include total costs, pharmacy costs,  
17 inpatient costs, outpatient costs, emergency department visit costs, medical costs and  
18 hospitalization costs for analysis based on direct costs. For indirect analysis the core outcomes  
19 include short term disability costs, workers compensation costs, paid time off costs, absenteeism  
20 costs and productivity costs. We suggest that further analysis of the contribution of each outcome to  
21 the overall cost of nonadherence be undertaken to help develop a tool that can be utilized for future  
22 research.  
23  
24  
25  
26  
27  
28  
29  
30  
31

32 Many studies have examined the relationship between nonadherence and economic outcomes using  
33 a cross-sectional analysis[51]. The implications of this are that potentially crucial confounders such  
34 as baseline status are ignored. In addition, a cross-sectional analysis may obscure temporality: for  
35 example, did greater adherence result in reduced costs and improved health outcomes, or was the  
36 patient healthier initially and more capable of being adherent? A longitudinal design is needed to  
37 overcome this limitation.  
38  
39  
40  
41

42 Economic evaluations inform decisions on how to best make use of scarce societal health resources  
43 through offering an organized consideration of the range of possible alternative courses of action  
44 and the evidence of the likely effects of each[20]. While none of the studies taken separately could  
45 inform a choice between alternative courses of action, they did provide key evidence for decision  
46 makers about costs associated with medication nonadherence. Pharmacy claims data were utilized  
47 by the majority of studies to model cost estimates. Three-quarters of the studies were classified as  
48 cost descriptions, providing a cost or outcome overview of the health consequences associated with  
49 nonadherence. Ten studies garnered a high quality classification, potentially limiting the overall  
50 conclusions that are able to be drawn and emphasized the need for future study design to  
51 incorporate elements allowing full economic evaluations to be conducted. Hughes et al[106]  
52  
53  
54  
55  
56  
57  
58  
59  
60

1  
2  
3 highlighted the need for more information on the consequences of nonadherence, so that economic  
4 evaluations could reflect the potential long-term effect of this growing problem.  
5  
6

7 Of the seventy nine included studies, sixty six of the studies were conducted in the United States.  
8 Conversion of costs to a common currency (US dollars) facilitated the comparison of studies and  
9 disease groups. Comparison of costs between healthcare systems is difficult as no two are the same  
10 and as healthcare is generally more expensive in the United States cost estimates may not reflect  
11 average values. Thus caution needs to be taken when interpreting results however findings help to  
12 represent the significance of the economic burden medication nonadherence plays. Analysis of  
13 studies not conducted in the United States support the finding that generally medication  
14 nonadherence incurs greater costs for all cost indicator outcomes other than pharmacy costs.  
15  
16  
17  
18  
19

20 Due to the advances in technology available to record and assess medication nonadherence, the  
21 inclusion of studies undertaken in the late 1990s and early 2000s may have affected the  
22 comparability of results, despite the fact that these studies met the inclusion criteria[22 23 65 73 74  
23 98]. The quality of data presents a limitation. Information on disease groups with fewer included  
24 studies may be less reliable than information on those with more. However, our findings affirm the  
25 pattern of association between nonadherence and increasing healthcare costs.  
26  
27  
28  
29  
30  
31  
32  
33  
34  
35  
36  
37  
38  
39  
40  
41  
42  
43  
44  
45  
46  
47  
48  
49  
50  
51  
52  
53  
54  
55  
56  
57  
58  
59  
60

## 5 Conclusion

Medication nonadherence places a significant cost burden on healthcare systems. However differences in methodological strategies make the comparison amongst studies challenging and reduce the ability for the true economic magnitude of the problem to be expressed in a meaningful manner. Further research is required to develop a streamlined approach to classify patient adherence. An economic model that adequately depicts the current landscape of the nonadherence problem using key economic indicators could help to stratify costs and inform key policy and decision makers. Utilization of existing data could help to better define costs and provide valuable input into the development of an economic framework to standardize the economic impact of medication nonadherence.

## 6 Footnotes

**Contributors:** RC, VGC, SB, FFL and MF conceived the paper. RC and VGC performed all the data extraction and quality assessment. RC drafted the initial form and all revisions of this manuscript. All other authors (RC, VGC, SB, FFL, MF) made significant contributions to the manuscript and read and modified the drafts. All authors read and approved the final manuscript.

**Funding:** This research received no specific grant from any funding agency in the public, commercial or not-for-profit sectors.

**Competing interests:** None declared

**Data sharing statement:** All data from systematic review available in paper and supplementary material.

**Acknowledgement:** RC research is supported by an Australian Government Research Training Program Scholarship.



1. Centres for Disease Control and Prevention. Chronic Disease Prevention and Health Promotion. Available from: <http://www.cdc.gov/chronicdisease/overview> Accessed June 24, 2016
2. World Health Organisation, National Institute of Aging, National Institute of Health and US Department of Health and Human Services. Global Health and Ageing. Published October 2011. . Available from: [http://www.who.int/ageing/publications/global\\_health.pdf](http://www.who.int/ageing/publications/global_health.pdf) Accessed June 24, 2016
3. Congressional Budget Office . Offsetting effects of prescription drug use on medicare’s spending for medical services. Congressional Budget Office Report. Published November 2012. Available from: <http://www.cbo.gov/sites/default/files/cbofiles/attachments/43741-MedicalOffsets-11-29-12.pdf>. Accessed Aug 10, 2017
4. World Health Organisation. Adherence to Long Term Therapies; Evidence for Action. Published 2003. . Available from: [http://www.who.int/chp/knowledge/publications/adherence\\_full\\_report.pdf?ua=1](http://www.who.int/chp/knowledge/publications/adherence_full_report.pdf?ua=1). Accessed November 6, 2015.
5. Horne R WJ, Barber N, Elliot R, Morgan M. Concordance, adherence and compliance in medicine taking. Report for the National Coordinating Centre for NHS Service Delivery and Organization R & D (NCCSDO). 2005
6. New England Healthcare Institute. Thinking outside the pillbox: a system-wide approach to improving patient medication adherence for chronic disease. Published August 2009. . Available from: [http://www.nehi.net/publications/44/thinking\\_outside\\_the\\_pillbox\\_a\\_systemwide\\_approach\\_to\\_improving\\_patient\\_medication\\_adherence\\_for\\_chronic\\_disease](http://www.nehi.net/publications/44/thinking_outside_the_pillbox_a_systemwide_approach_to_improving_patient_medication_adherence_for_chronic_disease). Accessed June 24, 2016.
7. Pharmaceutical Group of the European Union. Targeting adherence. Improving patient outcomes in Europe through community pharmacists’ intervention. Published May 2008. Available from: <http://www.pgeu.eu/policy/5-adherence.html>. Accessed January 28, 2016. .
8. IMS Institute for Healthcare Informatics. Advancing the responsible use of medicines; applying levers for change. Published October 2012. Available from: <http://pharmanalyses.fr/wp-content/uploads/2012/10/Advancing-Responsible-Use-of-Meds-Report-01-10-12.pdf>. Accessed March 10, 2016. .
9. AIHW 2016. Health expenditure Australia 2014–15. Health and welfare expenditure series no. 57. Cat. no. HWE 67. Canberra: AIHW. .
10. Sokol MC, McGuigan KA, Verbrugge RR, et al. Impact of medication adherence on hospitalization risk and healthcare cost. *Medical care* 2005;**43**:521-30
11. Vermiere E, Avonts D, Van Royen P, et al. Context and health outcomes. *Lancet* (London, England) 2001;**357**(9273):2059-60
12. American Pharmacists Association/APhA AP . Medication Compliance–Adherence–Persistence (CAP) Digest. Washington DC. American Pharmacists Association and Pfizer Pharmaceuticals; 2003.
13. Egede LE, Gebregziabher M, Dismuke CE, et al. Medication nonadherence in diabetes: longitudinal effects on costs and potential cost savings from improvement. *Diabetes care* 2012;**35**(12):2533-9 doi: 10.2337/dc12-0572[published Online First: Epub Date] |.
14. Bach PB. New Math on Drug Cost-Effectiveness. *The New England journal of medicine* 2015;**373**(19):1797-9 doi: 10.1056/NEJMp1512750[published Online First: Epub Date] |.
15. Roebuck MC, Liberman JN, Gemmill-Toyama M, et al. Medication Adherence Leads To Lower Health Care Use And Costs Despite Increased Drug Spending. *Health affairs* 2011;**30**(1):91-99 doi: 10.1377/hlthaff.2009.1087[published Online First: Epub Date] |.
16. OECD. *Health at a Glance 2015*: OECD Publishing.
17. Moher D, Liberati A, Tetzlaff J, et al. Preferred reporting items for systematic reviews and meta-analyses: the PRISMA statement. *Annals of internal medicine* 2009;**151**(4):264-9, w64

- 1
- 2
- 3 18. Higgins JPT, Green S (editors). Cochrane Handbook for Systematic Reviews of Interventions
- 4 Version 5.1.0 [updated March 2011]. The Cochrane Collaboration, 2011.
- 5 19. Shemilt I, Thomas J, Morciano M. A web-based tool for adjusting costs to a specific target
- 6 currency and price year. Evidence & Policy: A Journal of Research, Debate and Practice
- 7 2010;**6**(1):51-59
- 8 20. Drummond MF, Sculpher MJ, Claxton K, et al. *Methods for the economic evaluation of health*
- 9 *care programmes*: Oxford university press, 2015.
- 10 21. Drummond MF, Jefferson TO. Guidelines for authors and peer reviewers of economic
- 11 submissions to the BMJ. The BMJ Economic Evaluation Working Party. *Bmj*
- 12 1996;**313**(7052):275-83
- 13 22. Svarstad BL, Shireman TI, Sweeney JK. Using drug claims data to assess the relationship of
- 14 medication adherence with hospitalization and costs. *Psychiatric services (Washington, DC)*
- 15 2001;**52**:805-11
- 16 23. Gilmer TP, Dolder CR, Lacro JP, et al. Adherence to treatment with antipsychotic medication and
- 17 health care costs among Medicaid beneficiaries with schizophrenia. *The American journal of*
- 18 *psychiatry* 2004;**161**:692-9
- 19 24. Aubert RE, Yao J, Xia F, et al. Is there a relationship between early statin compliance and a
- 20 reduction in healthcare utilization? *The American journal of managed care* 2010;**16**:459-66
- 21 25. Bagalman E, Yu-Isenberg KS, Durden E, et al. Indirect costs associated with nonadherence to
- 22 treatment for bipolar disorder. *Journal of occupational and environmental medicine /*
- 23 *American College of Occupational and Environmental Medicine* 2010;**52**:478-85 doi:
- 24 10.1097/JOM.0b013e3181db811d[published Online First: Epub Date]].
- 25 26. Barnett PG, Chow A, Joyce VR, et al. Determinants of the Cost of Health Services Used by
- 26 Veterans With HIV. *Medical care* 2011;**49**:848-56 doi:
- 27 10.1097/MLR.0b013e31821b34c0[published Online First: Epub Date]].
- 28 27. Becker MA, Young MS, Ochshorn E, et al. The relationship of antipsychotic medication class and
- 29 adherence with treatment outcomes and costs for Florida Medicaid beneficiaries with
- 30 schizophrenia. *Administration and policy in mental health* 2007;**34**:307-14 doi:
- 31 10.1007/s10488-006-0108-5[published Online First: Epub Date]].
- 32 28. Briesacher BA, Andrade SE, Yood RA, et al. Consequences of poor compliance with
- 33 bisphosphonates. *Bone* 2007;**41**:882-7 doi: 10.1016/j.bone.2007.07.009[published Online
- 34 First: Epub Date]].
- 35 29. Candrilli SD, O'Brien SH, Ware RE, et al. Hydroxyurea adherence and associated outcomes among
- 36 Medicaid enrollees with sickle cell disease. *American journal of hematology* 2011;**86**:273-7
- 37 doi: 10.1002/ajh.21968[published Online First: Epub Date]].
- 38 30. Carter CT, Waters HC, Smith DB. Impact of infliximab adherence on Crohn's disease-related
- 39 healthcare utilization and inpatient costs. *Advances in therapy* 2011;**28**:671-83 doi:
- 40 10.1007/s12325-011-0048-7[published Online First: Epub Date]].
- 41 31. Casciano JP, Dotiwala ZJ, Martin BC, et al. The costs of warfarin underuse and nonadherence in
- 42 patients with atrial fibrillation: a commercial insurer perspective. *Journal of managed care*
- 43 *pharmacy : JMCP* 2013;**19**:302-16
- 44 32. Cooke CE, Lee HY, Xing S. Adherence to antiretroviral therapy in managed care members in the
- 45 United States: a retrospective claims analysis. *Journal of managed care pharmacy : JMCP*
- 46 2014;**20**:86-92
- 47 33. Darkow T, Henk HJ, Thomas SK, et al. Treatment interruptions and non-adherence with imatinib
- 48 and associated healthcare costs: a retrospective analysis among managed care patients with
- 49 chronic myelogenous leukaemia. *PharmacoEconomics* 2007;**25**:481-96
- 50 34. Davis KL, Edin HM, Allen JK. Prevalence and cost of medication nonadherence in Parkinson's
- 51 disease: evidence from administrative claims data. *Movement disorders : official journal of*
- 52 *the Movement Disorder Society* 2010;**25**(4):474-80 doi: 10.1002/mds.22999[published
- 53 Online First: Epub Date]].
- 54
- 55
- 56
- 57
- 58
- 59
- 60

- 1  
2  
3 35. Davis KLC, S. D.; Edin, H. M. Prevalence and cost of nonadherence with antiepileptic drugs in an  
4 adult managed care population. *Epilepsia* 2008;**49**(3):446-54 doi: 10.1111/j.1528-  
5 1167.2007.01414.x[published Online First: Epub Date]] .  
6  
7 36. Delea TE, Stanford RH, Hagiwara M, et al. Association between adherence with fixed dose  
8 combination fluticasone propionate/salmeterol on asthma outcomes and costs\*. *Current*  
9 *medical research and opinion* 2008;**24**:3435-42 doi: 10.1185/03007990802557344[published  
10 Online First: Epub Date]] .  
11 37. Delea TE, Thomas SK, Hagiwara M. The association between adherence to  
12 levodopa/carbidopa/entacapone therapy and healthcare utilization and costs among  
13 patients with Parkinson's disease: a retrospective claims-based analysis. *CNS drugs*  
14 2011;**25**:53-66 doi: 10.2165/11538970-000000000-00000[published Online First: Epub  
15 Date]] .  
16 38. Diehl JL, Daw JR, Coley KC, et al. Medical utilization associated with palivizumab compliance in a  
17 commercial and managed medicaid health plan. *Journal of managed care pharmacy : JMCP*  
18 2010;**16**:23-31  
19 39. Eaddy M, Grogg A, Locklear J. Assessment of compliance with antipsychotic treatment and  
20 resource utilization in a Medicaid population. *Clinical therapeutics* 2005;**27**:263-72 doi:  
21 10.1016/j.clinthera.2005.02.003[published Online First: Epub Date]] .  
22 40. Egede LE, Gebregziabher M, Dismuke CE, et al. Medication Nonadherence in Diabetes:  
23 Longitudinal effects on costs and potential cost savings from improvement. *Diabetes care*  
24 2012;**35**:2533-39 doi: 10.2337/dc12-0572[published Online First: Epub Date]] .  
25 41. Eisenberg DF, Placzek H, Gu T, et al. Cost and consequences of noncompliance to oral  
26 bisphosphonate treatment. *Journal of managed care & specialty pharmacy* 2015;**21**(1):56-65  
27 doi: 10.18553/jmcp.2015.21.1.56[published Online First: Epub Date]] .  
28 42. Ettinger AB, Manjunath R, Candrilli SD, et al. Prevalence and cost of nonadherence to  
29 antiepileptic drugs in elderly patients with epilepsy. *Epilepsy & behavior : E&B* 2009;**14**:324-  
30 9 doi: 10.1016/j.yebeh.2008.10.021[published Online First: Epub Date]] .  
31 43. Faight RE, Weiner JR, Guérin A, et al. Impact of nonadherence to antiepileptic drugs on health  
32 care utilization and costs: findings from the RANSOM study. *Epilepsia* 2009;**50**:501-9 doi:  
33 10.1111/j.1528-1167.2008.01794.x[published Online First: Epub Date]] .  
34 44. Gosselin A, Luo R, Lohoues H, et al. The impact of proton pump inhibitor compliance on health-  
35 care resource utilization and costs in patients with gastroesophageal reflux disease. *Value in*  
36 *health : the journal of the International Society for Pharmacoeconomics and Outcomes*  
37 *Research* 2009;**12**:34-9 doi: 10.1111/j.1524-4733.2008.00399.x[published Online First: Epub  
38 Date]] .  
39 45. Hagen SE, Wright DW, Finch R, et al. Impact of compliance to oral hypoglycemic agents on short-  
40 term disability costs in an employer population. *Population health management* 2014;**17**:35-  
41 41 doi: 10.1089/pop.2013.0009[published Online First: Epub Date]] .  
42 46. Halpern R, Becker L, Iqbal SU, et al. The association of adherence to osteoporosis therapies with  
43 fracture, all-cause medical costs, and all-cause hospitalizations: a retrospective claims  
44 analysis of female health plan enrollees with osteoporosis. *Journal of managed care*  
45 *pharmacy : JMCP* 2011;**17**:25-39  
46 47. Hansen RA, Farley JF, Droege M, et al. A retrospective cohort study of economic outcomes and  
47 adherence to monotherapy with metformin, pioglitazone, or a sulfonylurea among patients  
48 with type 2 diabetes mellitus in the United States from 2003 to 2005. *Clinical therapeutics*  
49 2010;**32**:1308-19 doi: 10.1016/j.clinthera.2010.07.011[published Online First: Epub Date]] .  
50 48. Hazel-Fernandez L, Louder AM, Foster SA, et al. Association of teriparatide adherence and  
51 persistence with clinical and economic outcomes in Medicare Part D recipients: a  
52 retrospective cohort study. *BMC musculoskeletal disorders* 2013;**14**:4 doi: 10.1186/1471-  
53 2474-14-4[published Online First: Epub Date]] .  
54  
55  
56  
57  
58  
59  
60

- 1  
2  
3 49. Huybrechts KF, Ishak KJ, Caro JJ. Assessment of compliance with osteoporosis treatment and its  
4 consequences in a managed care population. *Bone* 2006;**38**:922-8 doi:  
5 10.1016/j.bone.2005.10.022[published Online First: Epub Date]].  
6  
7 50. Ivanova JI, Bergman RE, Birnbaum HG, et al. Impact of medication adherence to disease-  
8 modifying drugs on severe relapse, and direct and indirect costs among employees with  
9 multiple sclerosis in the US. *Journal of medical economics* 2012;**15**:601-9 doi:  
10 10.3111/13696998.2012.667027[published Online First: Epub Date]].  
11  
12 51. Jha AK, Aubert RE, Yao J, et al. Greater adherence to diabetes drugs is linked to less hospital use  
13 and could save nearly \$5 billion annually. *Health affairs (Project Hope)* 2012;**31**:1836-46 doi:  
14 10.1377/hlthaff.2011.1198[published Online First: Epub Date]].  
15  
16 52. Jiang Y, Ni W. Estimating the Impact of Adherence to and Persistence with Atypical Antipsychotic  
17 Therapy on Health Care Costs and Risk of Hospitalization. *Pharmacotherapy* 2015;**35**(9):813-  
18 22 doi: 10.1002/phar.1634[published Online First: Epub Date]].  
19  
20 53. Joshi AV, Madhavan SS, Ambegaonkar A, et al. Association of medication adherence with  
21 workplace productivity and health-related quality of life in patients with asthma. *The Journal*  
22 *of asthma : official journal of the Association for the Care of Asthma* 2006;**43**:521-6 doi:  
23 10.1080/02770900600857010[published Online First: Epub Date]].  
24  
25 54. Kane SV, Chao J, Mulani PM. Adherence to infliximab maintenance therapy and health care  
26 utilization and costs by Crohn's disease patients. *Advances in therapy* 2009;**26**:936-46 doi:  
27 10.1007/s12325-009-0069-7[published Online First: Epub Date]].  
28  
29 55. Lee A, Song X, Khan I, et al. Association of cinacalcet adherence and costs in patients on dialysis.  
30 *Journal of medical economics* 2011;**14**:798-804 doi:  
31 10.3111/13696998.2011.627404[published Online First: Epub Date]].  
32  
33 56. Leider HL, Dhaliwal J, Davis EJ, et al. Healthcare costs and nonadherence among chronic opioid  
34 users. *The American journal of managed care* 2011;**17**:32-40  
35  
36 57. Mitra D, Hodgkins P, Yen L, et al. Association between oral 5-ASA adherence and health care  
37 utilization and costs among patients with active ulcerative colitis. *BMC gastroenterology*  
38 2012;**12**:132 doi: 10.1186/1471-230X-12-132[published Online First: Epub Date]].  
39  
40 58. Modi A, Siris ES, Tang J, et al. Cost and consequences of noncompliance with osteoporosis  
41 treatment among women initiating therapy. *Current medical research and opinion*  
42 2015;**31**(4):757-65 doi: 10.1185/03007995.2015.1016605[published Online First: Epub  
43 Date]].  
44  
45 59. Offord S, Lin J, Mirski D, et al. Impact of early nonadherence to oral antipsychotics on clinical and  
46 economic outcomes among patients with schizophrenia. *Advances in therapy* 2013;**30**:286-  
47 97 doi: 10.1007/s12325-013-0016-5[published Online First: Epub Date]].  
48  
49 60. Offord S, Lin J, Wong B, et al. Impact of oral antipsychotic medication adherence on healthcare  
50 resource utilization among schizophrenia patients with Medicare coverage. *Community*  
51 *mental health journal* 2013;**49**:625-9 doi: 10.1007/s10597-013-9638-y[published Online  
52 First: Epub Date]].  
53  
54 61. Pittman DG, Chen W, Bowlin SJ, et al. Adherence to statins, subsequent healthcare costs, and  
55 cardiovascular hospitalizations. *The American journal of cardiology* 2011;**107**:1662-6 doi:  
56 10.1016/j.amjcard.2011.01.052[published Online First: Epub Date]].  
57  
58 62. Pittman DG, Tao Z, Chen W, et al. Antihypertensive medication adherence and subsequent  
59 healthcare utilization and costs. *The American journal of managed care* 2010;**16**:568-76  
60  
63. Pruitt Z, Robst J, Langland-Orban B, et al. Healthcare costs associated with antiretroviral  
adherence among medicaid patients. *Applied health economics and health policy*  
2015;**13**:69-80 doi: 10.1007/s40258-014-0138-1[published Online First: Epub Date]].  
64. Quittner AL, Zhang J, Marynchenko M, et al. Pulmonary medication adherence and health-care  
use in cystic fibrosis. *Chest* 2014;**146**:142-51 doi: 10.1378/chest.13-1926[published Online  
First: Epub Date]].

- 1  
2  
3 65. Rizzo JAS, W. R. Variations in compliance among hypertensive patients by drug class: implications  
4 for health care costs. *Clinical therapeutics* 1997;**19**(6):1446-57; discussion 24-5  
5  
6 66. Robinson RL, Long SR, Chang S, et al. Higher costs and therapeutic factors associated with  
7 adherence to NCCA HEDIS antidepressant medication management measures: analysis of  
8 administrative claims. *Journal of managed care pharmacy : JMCP* 2006;**12**:43-54  
9  
10 67. Stroupe KT, Teal EY, Tu W, et al. Association of Refill Adherence and Health Care Use Among  
11 Adults with Hypertension in an Urban Health Care System. *Pharmacotherapy* 2006;**26**:779-  
12 89 doi: 10.1592/phco.26.6.779[published Online First: Epub Date]].  
13  
14 68. Sunycz JA, Mucha L, Baser O, et al. Impact of compliance and persistence with bisphosphonate  
15 therapy on health care costs and utilization. *Osteoporosis international : a journal*  
16 established as result of cooperation between the European Foundation for Osteoporosis and  
17 the National Osteoporosis Foundation of the USA 2008;**19**:1421-9 doi: 10.1007/s00198-008-  
18 0586-2[published Online First: Epub Date]].  
19  
20 69. Tan H, Cai Q, Agarwal S, et al. Impact of adherence to disease-modifying therapies on clinical and  
21 economic outcomes among patients with multiple sclerosis. *Advances in therapy*  
22 2011;**28**:51-61 doi: 10.1007/s12325-010-0093-7[published Online First: Epub Date]].  
23  
24 70. Tkacz J, Volpicelli J, Un H, et al. Relationship between buprenorphine adherence and health  
25 service utilization and costs among opioid dependent patients. *Journal of substance abuse*  
26 treatment 2014;**46**:456-62 doi: 10.1016/j.jsat.2013.10.014[published Online First: Epub  
27 Date]].  
28  
29 71. Wan GJ, Kozma CM, Slaton TL, et al. Inflammatory bowel disease: healthcare costs for patients  
30 who are adherent or non-adherent with infliximab therapy. *Journal of medical economics*  
31 2014;**17**:384-93 doi: 10.3111/13696998.2014.909436[published Online First: Epub Date]].  
32  
33 72. Wei Y-J, Palumbo FB, Simoni-Wastila L, et al. Antiparkinson drug adherence and its association  
34 with health care utilization and economic outcomes in a Medicare Part D population. *Value*  
35 in health : the journal of the International Society for Pharmacoeconomics and Outcomes  
36 Research 2014;**17**:196-204 doi: 10.1016/j.jval.2013.12.003[published Online First: Epub  
37 Date]].  
38  
39 73. White TJV, Ann; Ory, Caron; Dezii, Christopher M.; Chang, Eunice. Economic Impact of Patient  
40 Adherence with Antidepressant Therapy Within a Managed Care Organization. *Disease*  
41 *Management & Health Outcomes* 2003;**11**(12):817-22 doi: 10.2165/00115677-200311120-  
42 00006[published Online First: Epub Date]].  
43  
44 74. White TJV, Ann; Chang, Eunice; Dezii, Christopher M.; Abrams, Geoffrey D. The Costs of Non-  
45 Adherence to Oral Antihyperglycemic Medication in Individuals with Diabetes Mellitus and  
46 Concomitant Diabetes Mellitus and Cardiovascular Disease in a Managed Care Environment.  
47 *Disease Management & Health Outcomes* 2004;**12**(3):181-88 doi: 10.2165/00115677-  
48 200412030-00004[published Online First: Epub Date]].  
49  
50 75. Wu EQ, Johnson S, Beaulieu N, et al. Healthcare resource utilization and costs associated with  
51 non-adherence to imatinib treatment in chronic myeloid leukemia patients. *Current medical*  
52 *research and opinion* 2010;**26**:61-69 doi: 10.1185/03007990903396469[published Online  
53 First: Epub Date]].  
54  
55 76. Wu J, Seiber E, Lacombe VA, et al. Medical utilization and costs associated with statin adherence  
56 in Medicaid enrollees with type 2 diabetes. *The Annals of pharmacotherapy* 2011;**45**:342-9  
57 doi: 10.1345/aph.1P539[published Online First: Epub Date]].  
58  
59 77. Wu N, Chen S, Boulanger L, et al. Duloxetine compliance and its association with healthcare costs  
60 among patients with diabetic peripheral neuropathic pain. *Journal of medical economics*  
2009;**12**:192-202 doi: 10.3111/13696990903240559[published Online First: Epub Date]].  
78. Zhao Y, Chen S-Y, Wu N, et al. Medication Adherence and Healthcare Costs among Fibromyalgia  
Patients Treated with Duloxetine. *Pain Practice* 2011;**11**:381-91 doi: 10.1111/j.1533-  
2500.2010.00431.x[published Online First: Epub Date]].

- 1  
2  
3 79. Zhao Y, Johnston SS, Smith DM, et al. Association between teriparatide adherence and  
4 healthcare utilization and costs among hip fracture patients in the United States. *Bone*  
5 2014;**60**:221-6 doi: 10.1016/j.bone.2013.12.016[published Online First: Epub Date]].
- 6 80. Zhao Y, Johnston SS, Smith DM, et al. Association between teriparatide adherence and  
7 healthcare utilization and costs in real-world US kyphoplasty/vertebroplasty patients.  
8 *Osteoporosis International* 2013;**24**:2525-33 doi: 10.1007/s00198-013-2324-7[published  
9 Online First: Epub Date]].
- 10 81. Zhao Y, Zabriski S, Bertram C. Associations between statin adherence level, health care costs, and  
11 utilization. *Journal of managed care & specialty pharmacy* 2014;**20**:703-13
- 12 82. Robertson AG, Swanson JW, Van Dorn RA, et al. Treatment participation and medication  
13 adherence: effects on criminal justice costs of persons with mental illness. *Psychiatric*  
14 *services (Washington, DC)* 2014;**65**(10):1189-91 doi: 10.1176/appi.ps.201400247[published  
15 Online First: Epub Date]].
- 16 83. Buysman EK, Anderson A, Bacchus S, et al. Retrospective Study on the Impact of Adherence in  
17 Achieving Glycemic Goals in Type 2 Diabetes Mellitus Patients Receiving Canagliflozin. *Adv*  
18 *Ther* 2017;**34**(4):937-53 doi: 10.1007/s12325-017-0500-4[published Online First: Epub  
19 Date]].
- 20 84. Curtis SE, Boye KS, Lage MJ, et al. Medication adherence and improved outcomes among  
21 patients with type 2 diabetes. *The American journal of managed care* 2017;**23**(7):e208-e14
- 22 85. Davis JR, Wu B, Kern DM, et al. Impact of Nonadherence to Inhaled Corticosteroid/LABA Therapy  
23 on COPD Exacerbation Rates and Healthcare Costs in a Commercially Insured US Population.  
24 *American health & drug benefits* 2017;**10**(2):92-102
- 25 86. Ruetsch C, Tkacz J, Nadipelli VR, et al. Heterogeneity of nonadherent buprenorphine patients:  
26 subgroup characteristics and outcomes. *The American journal of managed care*  
27 2017;**23**(6):e172-e79
- 28 87. Kjellberg J, Jorgensen AD, Vestergaard P, et al. Cost and health care resource use associated with  
29 noncompliance with oral bisphosphonate therapy: an analysis using Danish health registries.  
30 *Osteoporosis International* 2016;**27**(12):3535-41 doi: 10.1007/s00198-016-3683-7[published  
31 Online First: Epub Date]].
- 32 88. Olsen KR, Hansen C, Abrahamsen B. Association between refill compliance to oral  
33 bisphosphonate treatment, incident fractures, and health care costs--an analysis using  
34 national health databases. *Osteoporosis international : a journal established as result of*  
35 *cooperation between the European Foundation for Osteoporosis and the National*  
36 *Osteoporosis Foundation of the USA* 2013;**24**:2639-47 doi: 10.1007/s00198-013-2365-  
37 y[published Online First: Epub Date]].
- 38 89. Miravittles M, Sicras A, Crespo C, et al. Costs of chronic obstructive pulmonary disease in relation  
39 to compliance with guidelines: a study in the primary care setting. *Therapeutic advances in*  
40 *respiratory disease* 2013;**7**:139-50 doi: 10.1177/1753465813484080[published Online First:  
41 Epub Date]].
- 42 90. Alvarez Payero M, Martinez Lopez de Castro N, Ucha Samartin M, et al. Medication non-  
43 adherence as a cause of hospital admissions. *Farmacia hospitalaria : organo oficial de*  
44 *expresion cientifica de la Sociedad Espanola de Farmacia Hospitalaria* 2014;**38**(4):328-33 doi:  
45 10.7399/fh.2014.38.4.7660[published Online First: Epub Date]].
- 46 91. Joe S, Lee JS. Association between non-compliance with psychiatric treatment and non-  
47 psychiatric service utilization and costs in patients with schizophrenia and related disorders.  
48 *BMC psychiatry* 2016;**16**(1):444 doi: 10.1186/s12888-016-1156-3[published Online First:  
49 Epub Date]].
- 50 92. Hong JS, Kang HC. Relationship between oral antihyperglycemic medication adherence and  
51 hospitalization, mortality, and healthcare costs in adult ambulatory care patients with type 2  
52 diabetes in South Korea. *Medical care* 2011;**49**:378-84 doi:  
53 10.1097/MLR.0b013e31820292d1[published Online First: Epub Date]].
- 54  
55  
56  
57  
58  
59  
60

- 1  
2  
3 93. Dilokthornsakul P, Chaiyakunapruk N, Nimpitakpong P, et al. The Effects of Medication Supply on  
4 Hospitalizations and Health-Care Costs in Patients with Chronic Heart Failure. *Value in Health*  
5 2012;**15**:S9-S14 doi: 10.1016/j.jval.2011.11.019[published Online First: Epub Date]].
- 6 94. An S-Y, Kim HJ, Chun KH, et al. Clinical and economic outcomes in medication-adherent and -  
7 nonadherent patients with type 2 diabetes mellitus in the Republic of Korea. *Clinical*  
8 *therapeutics* 2014;**36**:245-54 doi: 10.1016/j.clinthera.2013.12.012[published Online First:  
9 Epub Date]].
- 10 95. Dragomir A, Cote R, White M, et al. Relationship between adherence level to statins, clinical  
11 issues and health-care costs in real-life clinical setting. *Value in health : the journal of the*  
12 *International Society for Pharmacoeconomics and Outcomes Research* 2010;**13**(1):87-94 doi:  
13 10.1111/j.1524-4733.2009.00583.x[published Online First: Epub Date]].
- 14 96. Dragomir A, Côté R, Roy L, et al. Impact of adherence to antihypertensive agents on clinical  
15 outcomes and hospitalization costs. *Medical care* 2010;**48**:418-25 doi:  
16 10.1097/MLR.0b013e3181d567bd[published Online First: Epub Date]].
- 17 97. Gentil L, Vasiliadis HM, Preville M, et al. Adherence to Oral Antihyperglycemic Agents Among  
18 Older Adults With Mental Disorders and Its Effect on Health Care Costs, Quebec, Canada,  
19 2005-2008. *Preventing chronic disease* 2015;**12**:E230 doi: 10.5888/pcd12.150412[published  
20 Online First: Epub Date]].
- 21 98. Knapp M, King D, Pugner K, et al. Non-adherence to antipsychotic medication regimens:  
22 associations with resource use and costs. *The British journal of psychiatry : the journal of*  
23 *mental science* 2004;**184**:509-16
- 24 99. Hong J, Reed C, Novick D, et al. Clinical and economic consequences of medication non-  
25 adherence in the treatment of patients with a manic/mixed episode of bipolar disorder:  
26 results from the European Mania in Bipolar Longitudinal Evaluation of Medication (EMBLEM)  
27 study. *Psychiatry research* 2011;**190**:110-4 doi: 10.1016/j.psychres.2011.04.016[published  
28 Online First: Epub Date]].
- 29 100. Deeks JJ HJ, Altman DG (editors). *Cochrane Handbook for Systematic Reviews of Interventions*  
30 *Version 5.1.0 [updated March 2011]. . The Cochrane Collaboration, 2011*
- 31 101. Haynes RB, McDonald H, Garg AX, et al. Interventions for helping patients to follow  
32 prescriptions for medications. *The Cochrane database of systematic reviews*  
33 2002(2):CD000011 doi: 10.1002/14651858.CD000011[published Online First: Epub Date]].
- 34 102. Hess LM, Raebel MA, Conner DA, et al. Measurement of adherence in pharmacy administrative  
35 databases: a proposal for standard definitions and preferred measures. *The Annals of*  
36 *pharmacotherapy* 2006;**40**(7-8):1280-88 doi: 10.1345/aph.1H018[published Online First:  
37 Epub Date]].
- 38 103. Sattler EL, Lee JS, Perri M, 3rd. Medication (re)fill adherence measures derived from pharmacy  
39 claims data in older Americans: a review of the literature. *Drugs & aging* 2013;**30**(6):383-99  
40 doi: 10.1007/s40266-013-0074-z[published Online First: Epub Date]].
- 41 104. Karve S, Cleves MA, Helm M, et al. An empirical basis for standardizing adherence measures  
42 derived from administrative claims data among diabetic patients. *Medical care*  
43 2008;**46**(11):1125-33 doi: 10.1097/MLR.0b013e31817924d2[published Online First: Epub  
44 Date]].
- 45 105. Gargon E, Williamson PR, Altman DG, et al. The COMET Initiative database: progress and  
46 activities from 2011 to 2013. *Trials* 2014;**15**:279 doi: 10.1186/1745-6215-15-279[published  
47 Online First: Epub Date]].
- 48 106. Hughes DA, Bagust A, Haycox A, et al. Accounting for noncompliance in pharmacoeconomic  
49 evaluations. *Pharmacoeconomics* 2001;**19**(12):1185-97
- 50  
51  
52  
53  
54  
55  
56  
57  
58  
59  
60

**Figure Legends****Figure 1: PRISMA Flow Diagram**

The PRISMA diagram details the search and selection process applied during the overview. The search yielded a total of 2768 citations. Studies were selected based on the inclusion criteria; studies reporting the cost of medication nonadherence using original cost data. Intervention studies were required to report baseline data. Seventy nine original studies met the inclusion criteria.

**Figure 2: Annual Adjusted Medication Nonadherence Costs per patient per year**

Encompass the minimum, maximum and interquartile range of adjusted annual costs incurred by patients across disease groups where three or more studies were included for review. Gastrointestinal only included three studies limiting the range of costs. All cause costs encompass nonadherence costs incurred in mixed disease state studies, taking into account other confounding factors such as comorbidities.

**Figure 1: Annual Unadjusted Medication Nonadherence Costs per patient per year**

Encompass the minimum, maximum and interquartile range of unadjusted annual costs incurred by patients across disease groups where three or more studies were included for review. Epilepsy and addiction only included three studies limiting the range of costs. All cause costs encompass nonadherence costs incurred in mixed disease state studies, taking into account other confounding factors such as comorbidities.



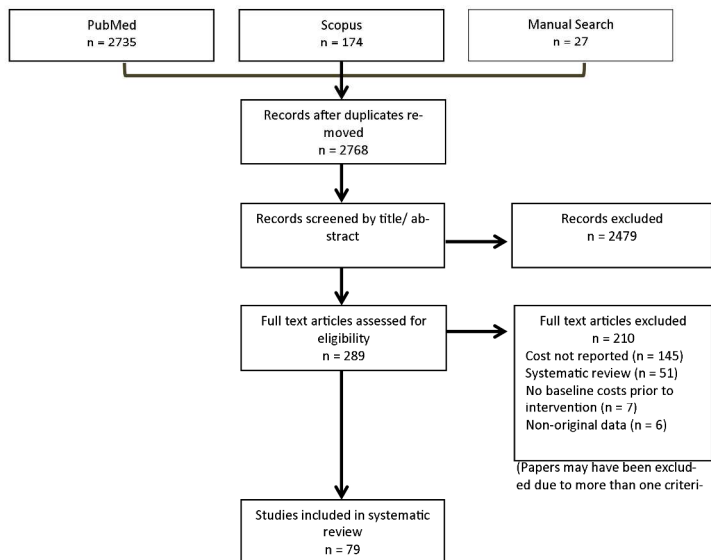

Figure 1: Flow diagram of references identified, retrieved and included in the systematic review

209x297mm (300 x 300 DPI)

1  
2  
3  
4  
5  
6  
7  
8  
9  
10  
11  
12  
13  
14  
15  
16  
17  
18  
19  
20  
21  
22  
23  
24  
25  
26  
27  
28  
29  
30  
31  
32  
33  
34  
35  
36  
37  
38  
39  
40  
41  
42  
43  
44  
45  
46  
47  
48  
49  
50  
51  
52  
53  
54  
55  
56  
57  
58  
59  
60

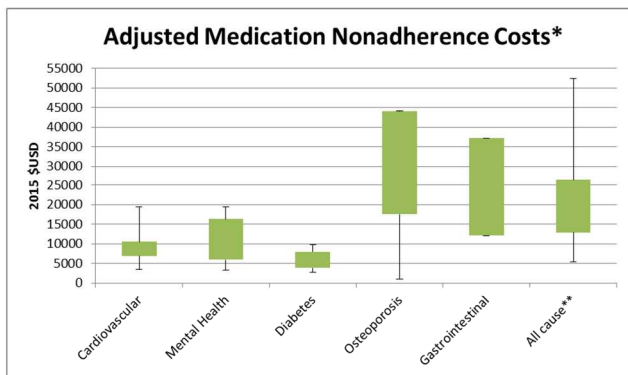

Figure 2: Annual Adjusted Medication Nonadherence Costs per patient per year  
\*Disease groups with three or more studies were included. Gastrointestinal only included three studies limiting the range of costs.  
\*\* All cause costs: mixed disease state studies

209x297mm (300 x 300 DPI)

1  
2  
3  
4  
5  
6  
7  
8  
9  
10  
11  
12  
13  
14  
15  
16  
17  
18  
19  
20  
21  
22  
23  
24  
25  
26  
27  
28  
29  
30  
31  
32  
33  
34  
35  
36  
37  
38  
39  
40  
41  
42  
43  
44  
45  
46  
47  
48  
49  
50  
51  
52  
53  
54  
55  
56  
57  
58  
59  
60

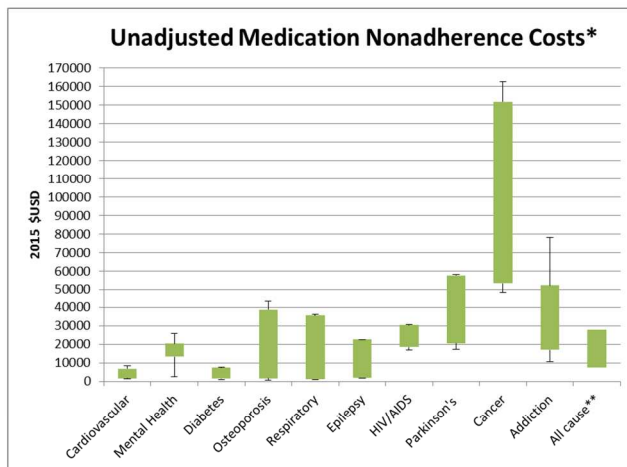

Figure 3: Annual Unadjusted Medication Nonadherence Costs per patient per year  
 \*Disease groups with three or more studies were included. Epilepsy and Addiction only included three studies limiting the range of costs.  
 \*\* All cause costs: mixed disease state studies

209x297mm (300 x 300 DPI)

eTable 1 Search Strategy<sup>1</sup>

| Database | Search Strategy                                                                                                                                                                                     |
|----------|-----------------------------------------------------------------------------------------------------------------------------------------------------------------------------------------------------|
| PubMed   | ((costs[TIAB] OR "Costs and Cost Analysis"[MH] OR burden[TIAB]) AND (nonadherence[TIAB] OR ("Patient Compliance"[MH] AND ("Drug Therapy"[MH] OR medication[TIAB]))) OR "Medication adherence"[MH])) |
| Scopus   | ( TITLE-ABS-KEY ( medication AND compliance OR patient AND compliance ) ) AND ( TITLE-ABS-KEY ( statistical AND model ) ) AND ( TITLE-ABS-KEY ( health AND care AND cost ) )                        |

<sup>1</sup> In accordance with the Cochrane Handbook for Systematic Reviews no date restriction filters were used.

eTable 2: Studies identified with costs reported by adherence level and disease group

| Author, Year, Country                                | Objective                                                                                                                                                                             | Study Characteristics                                                                                                                                       | Adherence (as reported in paper)                                                                                                                     | Outcomes/ Indicators                                                                  | Results (USD, 2015)                                                                                                                                                                                                                                                   | Quality                                                           |
|------------------------------------------------------|---------------------------------------------------------------------------------------------------------------------------------------------------------------------------------------|-------------------------------------------------------------------------------------------------------------------------------------------------------------|------------------------------------------------------------------------------------------------------------------------------------------------------|---------------------------------------------------------------------------------------|-----------------------------------------------------------------------------------------------------------------------------------------------------------------------------------------------------------------------------------------------------------------------|-------------------------------------------------------------------|
| <b>Cardiovascular Disease</b>                        |                                                                                                                                                                                       |                                                                                                                                                             |                                                                                                                                                      |                                                                                       |                                                                                                                                                                                                                                                                       |                                                                   |
| <i>Aubert et al</i> [1]<br>2010<br>US                | To investigate whether compliance during the first 2 years of statin therapy is associated with reduced hospitalization rates and direct medical costs during year 3.                 | <u>Design:</u> Retrospective cohort study<br><u>Follow Up:</u> 3 years<br><u>Sample Size:</u> 10227 (A:3512, NA:6715)                                       | <u>Measure:</u> MPR<br><u>Classification:</u> MPR < 80 = non-compliant<br><u>Method of Assessment:</u> pharmacy claims data                          | Total Healthcare costs<br>Medical Costs                                               | <u>Type of Costs:</u> adjusted<br><u>Classification:</u> disease state specific<br><u>Currency Year:</u> USD, 2002<br><u>Cost of Nonadherence:</u> THC:\$5289.61 (\$6865.90), MC:\$4908.09 (\$6370.60)                                                                | <u>Quality:</u> medium<br><u>Classification:</u> cost description |
| <i>Casciano et al</i> [2]<br>2013<br>US              | To assess the economic burden of underuse and nonadherence of warfarin therapy among patients with non-valvular atrial fibrillation in a commercially insured population.             | <u>Design:</u> Retrospective, observational, quasi-experimental study<br><u>Follow Up:</u> 18months<br><u>Sample Size:</u> 13289 (A:2852, NA:4184, NE:6253) | <u>Measure:</u> PDC<br><u>Classification:</u> PDC <80 = low adherence, 0 = no warfarin exposure<br><u>Method of Assessment:</u> pharmacy claims data | Total Costs<br>Inpatient Costs<br>Outpatient Costs<br>Pharmacy Costs<br>Medical Costs | <u>Type of Costs:</u> adjusted<br><u>Classification:</u> all cause<br><u>Currency Year:</u> USD, 2005<br><u>Cost of Nonadherence*:</u> TC:\$16612.44(\$19936.70), IC:\$9382.56 (\$11260.10), OC:\$8605.92 (\$10328), PC:\$2388.24 (\$2866.20), MC:\$15235.80(\$18285) | <u>Quality:</u> medium<br><u>Classification:</u> cost description |
| <i>Dilokthornsakul et al</i> [3]<br>2012<br>Thailand | To determine the effects of medication supplies on healthcare costs and hospitalizations in patients with chronic heart failure receiving angiotensin converting enzyme inhibitors or | <u>Design:</u> Retrospective cohort study<br><u>Follow Up:</u> 1 year<br><u>Sample Size:</u> 393 (A:168, NA:219, OA:6)                                      | <u>Measure:</u> MPR<br><u>Classification:</u> MPR < 80 = undersupply, MPR >120 = oversupply<br><u>Method of Assessment:</u> pharmacy claims data     | Total Healthcare Costs<br>Inpatient Costs<br>Outpatient Costs                         | <u>Type of Costs:</u> unadjusted<br><u>Classification:</u> disease state specific<br><u>Currency Year:</u> USD, 2004<br><u>Cost of Nonadherence:</u> THC:\$1157 (\$1433.06), IC:\$1019 (\$1262.13), OC:\$138 (\$170.93)                                               | <u>Quality:</u> high<br><u>Classification:</u> cost description   |

|    |                           |                        |                              |                        |                 |                                                   |
|----|---------------------------|------------------------|------------------------------|------------------------|-----------------|---------------------------------------------------|
| 1  |                           |                        |                              |                        |                 |                                                   |
| 2  |                           |                        |                              |                        |                 |                                                   |
| 3  |                           |                        |                              |                        |                 |                                                   |
| 4  |                           | angiotensin receptor   |                              |                        |                 |                                                   |
| 5  |                           | blockers.              |                              |                        |                 |                                                   |
| 6  | <i>Dragomir et al</i> [4] | To evaluate the impact | <u>Design:</u> Retrospective | <u>Measure:</u> MPR    | Total           | <u>Type of Costs:</u> unadjusted and predicted    |
| 7  | 2010                      | of low adherence to    | cohort study                 | <u>Classification:</u> | Healthcare      | <u>Classification:</u> disease state specific and |
| 8  | Canada                    | antihypertensive       | <u>Follow Up:</u> 3 years    | MPR $\geq$ 80 =        | Costs           | hospitalized patients                             |
| 9  |                           | agents on              | <u>Sample Size:</u> 56896    | adherent, MPR <        | Pharmacy        | <u>Currency Year:</u> CAD, 2006                   |
| 10 |                           | cardiovascular         | (A:38217, NA:18679)          | 80 = nonadherent       | Costs           | <u>Cost of Nonadherence:</u> Unadjusted           |
| 11 |                           | outcomes and           |                              | <u>Method of</u>       | Medical Costs   | Disease state specific: THC:\$7165                |
| 12 |                           | hospitalization costs. |                              | <u>Assessment:</u>     | Hospitalization | (\$6900.87), PC: \$1800 (\$1733.64),              |
| 13 |                           |                        |                              | pharmacy claims        | Costs           | MC: \$1370 (\$1319.50), HC: \$3995                |
| 14 |                           |                        |                              | data                   |                 | (\$3847.73)                                       |
| 15 |                           |                        |                              |                        |                 | Unadjusted Hospitalized patients:                 |
| 16 |                           |                        |                              |                        |                 | THC: \$17397 (\$16755.67), PC:\$2685              |
| 17 |                           |                        |                              |                        |                 | (\$2586.02), MC:\$2608 (\$2511.86),               |
| 18 |                           |                        |                              |                        |                 | HC: \$12104 (\$11657.79)                          |
| 19 |                           |                        |                              |                        |                 | Predicted disease state specific:                 |
| 20 |                           |                        |                              |                        |                 | HC:\$3877 (\$3734.08)                             |
| 21 |                           |                        |                              |                        |                 | Predicted hospitalized patient:                   |
| 22 |                           |                        |                              |                        |                 | HC:\$11715 (\$11283.13)                           |
| 23 |                           |                        |                              |                        |                 |                                                   |
| 24 |                           |                        |                              |                        |                 |                                                   |
| 25 | <i>Dragomir et al</i> [5] | To evaluate the impact | <u>Design:</u> Retrospective | <u>Measure:</u> MPR    | Total           | <u>Type of Costs:</u> unadjusted and predicted    |
| 26 | 2010                      | of low adherence to    | cohort study                 | <u>Classification:</u> | Healthcare      | <u>Classification:</u> disease state specific and |
| 27 | Canada                    | statins on clinical    | <u>Follow Up:</u> 3 years    | MPR $\geq$ 80 =        | Costs           | hospitalized patients                             |
| 28 |                           | issues and direct      | <u>Sample Size:</u> 55134    | adherent, MPR <        | Pharmacy        | <u>Currency Year:</u> CAD, 2005                   |
| 29 |                           | healthcare costs.      | (A:28549, NA:26585)          | 80 = nonadherent       | Costs           | <u>Cost of Nonadherence:</u> Unadjusted           |
| 30 |                           |                        |                              | <u>Method of</u>       | Medical Costs   | Disease state specific:                           |
| 31 |                           |                        |                              | <u>Assessment:</u>     | Hospitalization | THC:\$6243 (\$6175.76), PC:\$2506                 |
| 32 |                           |                        |                              | pharmacy claims        | Costs           | (\$2479.01), MC:\$1241 (\$1227.63),               |
| 33 |                           |                        |                              | data                   |                 | HC:\$2496 (\$2469.12)                             |
| 34 |                           |                        |                              |                        |                 | Unadjusted Hospitalized patients:                 |
| 35 |                           |                        |                              |                        |                 | THC:\$14725 (\$14566.40), PC:\$3374               |
| 36 |                           |                        |                              |                        |                 | (\$3337.66), MC:\$2475 (\$2448.34),               |
| 37 |                           |                        |                              |                        |                 | HC:\$8876 (\$8780.40)                             |
| 38 |                           |                        |                              |                        |                 | Predicted disease state specific:                 |
| 39 |                           |                        |                              |                        |                 |                                                   |
| 40 |                           |                        |                              |                        |                 |                                                   |
| 41 |                           |                        |                              |                        |                 |                                                   |
| 42 |                           |                        |                              |                        |                 |                                                   |
| 43 |                           |                        |                              |                        |                 |                                                   |
| 44 |                           |                        |                              |                        |                 |                                                   |
| 45 |                           |                        |                              |                        |                 |                                                   |
| 46 |                           |                        |                              |                        |                 |                                                   |
| 47 |                           |                        |                              |                        |                 |                                                   |

|    |                          |                       |                              |                        |                 |                                               |                             |
|----|--------------------------|-----------------------|------------------------------|------------------------|-----------------|-----------------------------------------------|-----------------------------|
| 1  |                          |                       |                              |                        |                 |                                               |                             |
| 2  |                          |                       |                              |                        |                 |                                               |                             |
| 3  |                          |                       |                              |                        |                 |                                               |                             |
| 4  |                          |                       |                              |                        |                 | HC:\$2669 (\$2640.25)                         |                             |
| 5  |                          |                       |                              |                        |                 | Predicted hospitalized patient: HC\$9214      |                             |
| 6  |                          |                       |                              |                        |                 | (\$9114.76)                                   |                             |
| 7  | <i>Pittman et al</i> [6] | To examine the        | <u>Design:</u> Retrospective | <u>Measure:</u> MPR    | Total           | <u>Type of Costs:</u> adjusted                | <u>Quality:</u> medium      |
| 8  | 2011                     | relation among statin | cohort study                 | <u>Classification:</u> | Healthcare      | <u>Classification:</u> all cause and disease  | <u>Classification:</u> cost |
| 9  | US                       | adherence, subsequent | <u>Follow Up:</u> 18 months  | MPR $\geq$ 80 =        | Costs           | state specific                                | description                 |
| 10 |                          | hospitalizations and  | <u>Sample Size:</u> 381422   | >60<79% =              | Pharmacy        | <u>Currency Year:</u> USD, 2009               |                             |
| 11 |                          | healthcare costs.     | (A:258013, MA:65795,         | moderate               | Costs           | <u>Cost of Nonadherence*:</u> all cause:      |                             |
| 12 |                          |                       | LA:57614)                    | adherence, MPR         | Medical Costs   | THC(>80):\$6798.67 (\$7505.66),               |                             |
| 13 |                          |                       |                              | <59 =low               |                 | THC(60-79):\$7072.67 (\$7808.16),             |                             |
| 14 |                          |                       |                              | adherence              |                 | THC(<59):\$7401.33 (\$8170.99),               |                             |
| 15 |                          |                       |                              | <u>Method of</u>       |                 | PC(>80):\$1767.33 (\$1951.11),                |                             |
| 16 |                          |                       |                              | <u>Assessment:</u>     |                 | PC(60-79):\$1789.33 (\$1975.40),              |                             |
| 17 |                          |                       |                              | pharmacy claims        |                 | PC(<59):\$1937.33 (\$2138.79),                |                             |
| 18 |                          |                       |                              | data                   |                 | MC(>80):\$4472.67 (\$4937.78),                |                             |
| 19 |                          |                       |                              |                        |                 | MC(60-79):\$4840.67 (\$5344.05),              |                             |
| 20 |                          |                       |                              |                        |                 | MC(<59):\$5138.67 (\$5673.04)                 |                             |
| 21 |                          |                       |                              |                        |                 | Disease state specific:                       |                             |
| 22 |                          |                       |                              |                        |                 | PC(>80):\$558.67 (\$616.77),                  |                             |
| 23 |                          |                       |                              |                        |                 | PC(60-79):\$442.67 (\$488.70),                |                             |
| 24 |                          |                       |                              |                        |                 | PC(<59):\$325.33 (\$359.16),                  |                             |
| 25 |                          |                       |                              |                        |                 | MC(>80):\$1596.67 (\$1762.71),                |                             |
| 26 |                          |                       |                              |                        |                 | MC(60-79):\$1722 (\$1901.07),                 |                             |
| 27 |                          |                       |                              |                        |                 | MC(<59):\$1792.67 (\$1979.09)                 |                             |
| 28 |                          |                       |                              |                        |                 |                                               |                             |
| 29 |                          |                       |                              |                        |                 |                                               |                             |
| 30 |                          |                       |                              |                        |                 |                                               |                             |
| 31 | <i>Pittman et al</i> [7] | To evaluate the       | <u>Design:</u> Retrospective | <u>Measure:</u> MPR    | Total           | <u>Type of Costs:</u> adjusted and unadjusted | <u>Quality:</u> medium      |
| 32 | 2010                     | relationship between  | cohort study                 | <u>Classification:</u> | Healthcare      | <u>Classification:</u> disease state specific | <u>Classification:</u> cost |
| 33 | US                       | adherence to          | <u>Follow Up:</u> 2 years    | MPR $\geq$ 80 =        | Costs           | <u>Currency Year:</u> USD, 2008               | description                 |
| 34 |                          | antihypertensive      | <u>Sample Size:</u>          | adherent, MPR          | Outpatient      | <u>Cost of Nonadherence:</u> Adjusted:        |                             |
| 35 |                          | medications and       | 625620(A:467006,             | >60<79% =              | Costs           | THC(>80):\$7261 (\$8077.79),                  |                             |
| 36 |                          | subsequent            | MA:96226, LA:62388)          | moderate               | ED Costs        | THC(60-79):\$7530 (\$8377.05),                |                             |
| 37 |                          | hospitalizations,     |                              | adherence, MPR         | Pharmacy        | THC(<59):\$7370 (\$8199.05),                  |                             |
| 38 |                          | emergency             |                              | <59 =low               | Costs           | OC(>80):\$3390 (\$3771.34),                   |                             |
| 39 |                          | department visits and |                              | adherence              | Hospitalization | OC(60-79):\$3705 (\$4121.77),                 |                             |
| 40 |                          |                       |                              |                        |                 |                                               |                             |
| 41 |                          |                       |                              |                        |                 |                                               |                             |
| 42 |                          |                       |                              |                        |                 |                                               |                             |
| 43 |                          |                       |                              |                        |                 |                                               |                             |
| 44 |                          |                       |                              |                        |                 |                                               |                             |
| 45 |                          |                       |                              |                        |                 |                                               |                             |
| 46 |                          |                       |                              |                        |                 |                                               |                             |
| 47 |                          |                       |                              |                        |                 |                                               |                             |

costs of care.

Method of Assessment:  
pharmacy claims data

Costs

OC(<59):\$3776 (\$4200.76),  
EDC(>80):\$101 (\$112.36),  
EDC(60-79):\$134 (\$149.07),  
EDC(<59):\$172 (\$191.35),  
PC(>80):\$2383 (\$2651.06),  
PC(60-79):\$1932 (\$2149.33),  
PC(<59):\$1509 (\$1678.75),  
HC(>80):\$1386 (\$1541.91),  
HC(60-79):\$1759 (\$1956.87),  
HC(<59):\$1913 (\$2128.19)  
Unadjusted:  
THC(>80):\$7182 (\$7989.90),  
THC(60-79):\$7560 (\$8410.42),  
THC(<59):\$7995 (\$8894.35),  
OC(>80):\$3396 (\$3778.01),  
OC(60-79):\$3635 (\$4043.90),  
OC(<59):\$3887 (\$4324.25),  
EDC(>80):\$102 (\$113.47),  
EDC(60-79):\$131 (\$145.74),  
EDC(<59):\$172 (\$191.35),  
PC(>80):\$2317 (\$2577.64),  
PC(60-79):\$2034 (\$2262.80),  
PC(<59):\$1880 (\$2091.48),  
HC(>80):\$1366 (\$1519.66),  
HC(60-79):\$1759 (\$1956.87),  
HC(<59):\$2057 (\$2288.39)

Rizzo *et al*[8]  
1997  
US

To investigate variations in compliance with four classes of antihypertensive agents- diuretics, ACEIs, CCBs and  $\beta$ -

Design: Retrospective cohort study  
Follow Up: 12 months  
Sample Size: 7211(P:2668, NC:3101, NP:649, T:793)

Measure: ordinary least square regression analysis  
Classification: >80% = persistent,  $\geq$ 30<80% = non-compliance, <30%

Total Healthcare Costs

Type of Costs: unadjusted  
Classification: all cause and disease state specific  
Currency Year: USD, 1994  
Cost of Nonadherence: All cause:  
THC(>80):\$341 (\$509.66),  
THC(30-80):\$694 (\$1037.26),

Quality: low  
Classification: cost description



blockers and the health care costs associated with various degrees of compliance.

= non-persistence  
Method of Assessment:  
 pharmacy claims data

THC(<30):\$735 (\$1098.53)  
 Disease state specific:  
 Renal:  
 THC(>80):\$2135 (\$3190.98),  
 THC(30-80):\$2488 (\$3718.58),  
 THC(<30):\$2529 (\$3779.86),  
 Acute MI:  
 THC(>80):\$1358 (\$2029.67),  
 THC(30-80):\$1711 (\$2557.27),  
 THC(<30):\$1752 (\$2618.55), Diabetes:  
 THC(>80):\$770 (\$1150.85),  
 THC(30-80):\$1123 (\$1678.44),  
 THC(<30):\$1164 (\$1739.72),  
 CHF:  
 THC(>80):\$698 (\$1043.23),  
 THC(30-80):\$1051 (\$1570.83),  
 THC(<30):\$1092 (\$1632.11),  
 Angina:  
 THC(>80):\$702 (\$1049.21),  
 THC(30-80):\$1055 (\$1576.81),  
 THC(<30):\$1096 (\$1638.09)

Sokol et al[9]  
 2005  
 US

To evaluate the impact of medication adherence on healthcare utilisation and cost for 4 chronic conditions that are major drivers of drug spending: diabetes, hypertension, hypercholesterolemia, and congestive heart failure.

Design: Retrospective cohort observational study  
Follow Up: 12 months  
Sample Size: 137277  
 Diabetes:(≥80: 1801, 60-79: 599, 40-59: 419, 20-39: 259, <19: 182)  
 Hypertension:(≥80: 5804, 60-79: 921, 40-59: 562, 20-39: 344, <19: 350)

Measure:  
 medication supply  
Classification: 1-19%, 20-39%, 40-59%, 60-79%, 80-100%  
Method of Assessment:  
 pharmacy claims data

Total Costs  
 Pharmacy Costs  
 Medical Costs

Type of Costs: adjusted  
Classification: all cause and disease state specific  
Currency Year: USD, 1998  
Cost of Nonadherence: All cause:  
 Diabetes:  
 TC(1-19):\$16498 (\$23071.58),  
 TC(20-39):\$13077 (\$18287.49),  
 TC(40-59):\$12978 (\$18149.05),  
 TC(60-79):\$11484 (\$16059.77),  
 TC(80-100):\$8886 (\$12426.60),  
 PC(1-19):\$1312 (\$1834.76),

Quality: medium  
Classification: cost description

1  
2  
3  
4  
5  
6  
7  
8  
9  
10  
11  
12  
13  
14  
15  
16  
17  
18  
19  
20  
21  
22  
23  
24  
25  
26  
27  
28  
29  
30  
31  
32  
33  
34  
35  
36  
37  
38  
39  
40  
41  
42  
43  
44  
45  
46  
47

Hypercholesterolemia:  
( $\geq 80$ : 1754, 60-79: 520,  
40-59: 324, 20-39: 216,  
<19: 167)  
CHF: ( $\geq 80$ : 518, 60-79:  
107, 40-59: 82, 20-39:  
70, <19: 86)

PC(20-39):\$1877 (\$2624.89),  
PC(40-59):\$1970 (\$2754.94),  
PC(60-79):\$2121 (\$2966.11),  
PC(80-100):\$2510 (\$3510.10),  
MC(1-19):\$15186 (\$21236.82),  
MC(20-39):\$11200 (\$15662.61),  
MC(40-59):\$11008 (\$15394.10),  
MC(60-79):\$9363 (\$13093.66),  
MC(80-100):\$6377 (\$8917.90),  
Hypertension:  
TC(1-19):\$9747 (\$13630.66),  
TC(20-39):\$11238 (\$15715.75),  
TC(40-59):\$9491 (\$13272.66),  
TC(60-79):\$8929 (\$12486.73),  
TC(80-100):\$8386 (\$11272.38),  
PC(1-19):\$916 (\$1280.98),  
PC(20-39):\$952 (\$1331.32),  
PC(40-59):\$1123 (\$1570.46),  
PC(60-79):\$1271 (\$1777.43),  
PC(80-100):\$1817 (\$2540.98),  
MC(1-19):\$8831 (\$12349.69),  
MC(20-39):\$10286 (\$14384.43),  
MC(40-59):\$8368 (\$11702.20),  
MC(60-79):\$7658 (\$10709.31),  
MC(80-100):\$6570 (\$9187.80),  
Hypercholesterolemia:  
TC(1-19):\$10916 (\$15265.45),  
TC(20-39):\$7982 (\$11162.40),  
TC(40-59):\$6756 (\$9447.91),  
TC(60-79):\$8412 (\$11763.74),  
TC(80-100):\$6752 (\$9442.31),  
PC(1-19):\$1067 (\$1492.14),  
PC(20-39):\$1152 (\$1611.01),

1  
2  
3  
4  
5  
6  
7  
8  
9  
10  
11  
12  
13  
14  
15  
16  
17  
18  
19  
20  
21  
22  
23  
24  
25  
26  
27  
28  
29  
30  
31  
32  
33  
34  
35  
36  
37  
38  
39  
40  
41  
42  
43  
44  
45  
46  
47

PC(40-59):\$1247 (\$1743.86),  
PC(60-79):\$1736 (\$2427.70),  
PC(80-100):\$1972 (\$2757.74),  
MC(1-19):\$9849(\$13773.30),  
MC(20-39):\$6830 (\$9551.39),  
MC(40-59):\$5509 (\$7704.04),  
MC(60-79):\$6676 (\$9336.03),  
MC(80-100):\$4780 (\$6684.58),  
CHF:  
TC(1-19):\$23964 (\$33512.38),  
TC(20-39):\$19188 (\$26833.40),  
TC(40-59):\$26311 (\$36794.54),  
TC(60-79):\$29785 (\$41652.74),  
TC(80-100):\$22164 (\$30995.18),  
PC(1-19):\$1961 (\$2742.35),  
PC(20-39):\$2055 (\$2873.81),  
PC(40-59):\$2208 (\$3087.77),  
PC(60-79):\$3412 (\$4771.50),  
PC(80-100):\$3107 (\$4344.97),  
MC(1-19):\$22003 (\$30770.03),  
MC(20-39):\$17133 (\$23959.59),  
MC(40-59):\$24103 (\$33706.77),  
MC(60-79):\$26373 (\$36881.24),  
MC(80-100):\$19056 (\$26648.81)  
Disease state specific: Diabetes:  
TC(1-19):\$8867 (\$12400.03),  
TC(20-39):\$7124 (\$9916.90),  
TC(40-59):\$6522 (\$9120.67),  
TC(60-79):\$6291 (\$8797.63),  
TC(80-100):\$4570 (\$6390.90),  
PC(1-19):\$55 (\$76.91),  
PC(20-39):\$165 (\$230.74),  
PC(40-59):\$285 (\$398.56),

1  
2  
3  
4  
5  
6  
7  
8  
9  
10  
11  
12  
13  
14  
15  
16  
17  
18  
19  
20  
21  
22  
23  
24  
25  
26  
27  
28  
29  
30  
31  
32  
33  
34  
35  
36  
37  
38  
39  
40  
41  
42  
43  
44  
45  
46  
47

PC(60-79):\$404 (\$564.97),  
PC(80-100):\$763 (\$1067.02),  
MC(1-19):\$8812 (\$12323.11),  
MC(20-39):\$6959 (\$9731.79),  
MC(40-59):\$6237 (\$8722.11),  
MC(60-79):\$5887 (\$8232.66),  
MC(80-100):\$3808 (\$5325.29),  
Hypertension:  
TC(1-19):\$4878 (\$6821.62),  
TC(20-39):\$6062 (\$8477.39),  
TC(40-59):\$5297 (\$7407.57),  
TC(60-79):\$5262 (\$7358.63),  
TC(80-100):\$4871 (\$6811.84),  
PC(1-19):\$31 (\$43.35),  
PC(20-39):\$89(\$124.46),  
PC(40-59):\$184 (\$257.31),  
PC(60-79):\$285 (\$398.56),  
PC(80-100):\$489 (\$683.84),  
MC(1-19):\$4847 (\$6778.27),  
MC(20-39):\$5973 (\$8352.92),  
MC(40-59):\$5113 (\$7150.26),  
MC(60-79):\$4977 (\$6960.07),  
MC(80-100):\$4383 (\$6129.39),  
Hypercholesterolemia:  
TC(1-19):\$6888 (\$9632.50),  
TC(20-39):\$4999 (\$6990.84),  
TC(40-59):\$3825 (\$5349.06),  
TC(60-79):\$5541 (\$7748.79),  
TC(80-100):\$3924(\$5487.51),  
PC(1-19):\$78 (\$109.08),  
PC(20-39):\$213 (\$297.87),  
PC(40-59):\$373 (\$521.62),  
PC(60-79):\$603 (\$843.26),

For peer review

PC(80-100):\$801 (\$1120.16),  
 MC(1-19):\$6810 (\$9523.42),  
 MC(20-39):\$4786 (\$6692.97),  
 MC(40-59):\$3452 (\$4827.44),  
 MC(60-79):\$4938 (\$6905.53),  
 MC(80-100):\$3124 (\$4368.75),  
 CHF:  
 TC(1-19):\$9841 (\$13762.12),  
 TC(20-39):\$7733 (\$10814.19),  
 TC(40-59):\$11378 (\$15911.53),  
 TC(60-79):\$13924 (\$19471.98),  
 TC(80-100):\$12698 (\$17787.48),  
 PC(1-19):\$15 (\$20.98),  
 PC(20-39):\$90 (\$125.86),  
 PC(40-59):\$134 (\$187.39),  
 PC(60-79):\$158 (\$220.95),  
 PC(80-100):\$437 (\$611.12),  
 MC(1-19):\$9826 (\$13741.14),  
 MC(20-39):\$7643 (\$10688.33),  
 MC(40-59):\$11244 (\$15724.14),  
 MC(60-79):\$13766 (\$19251.02),  
 MC(80-100):\$12261 (\$17146.36)

29 *Stroupe et al*[10]  
 30 2006  
 31 US

To determine the rates  
 of undersupply,  
 appropriate supply,  
 and oversupply of  
 antihypertensive drugs  
 as measured by refill  
 adherence, among  
 patient with  
 complicated and  
 uncomplicated  
 hypertension and to

Design: Retrospective  
 cohort study  
Follow Up: 3.3 years  
Sample Size: 15206  
 (not specified)

Measure: MPR  
Classification:  
 MPR<80 =  
 undersupply, MPR  
 >120 = oversupply  
Method of  
Assessment:  
 pharmacy claims  
 data

Total  
 Healthcare  
 Costs  
 Inpatient  
 Costs  
 Outpatient  
 Costs  
 Pharmacy  
 Costs

Type of Costs: unadjusted  
Classification: disease state specific  
Currency Year: USD, 2002  
Cost of Nonadherence \*\*: THC:\$6032.5  
 (\$7830.11), IC:\$2067 (\$2682.94),  
 OC:\$3965 (\$5146.52), PC:\$130  
 (\$168.74)

Quality: medium  
Classification: cost  
 description

1  
2  
3  
4  
5  
6  
7  
8  
9  
10  
11  
12  
13  
14  
15  
16  
17  
18  
19  
20  
21  
22  
23  
24  
25  
26  
27  
28  
29  
30  
31  
32  
33  
34  
35  
36  
37  
38  
39  
40  
41  
42  
43  
44  
45  
46  
47

1  
2  
3  
4  
5  
6  
7  
8  
9  
10  
11  
12  
13  
14  
15  
16  
17  
18  
19  
20  
21  
22  
23  
24  
25  
26  
27  
28  
29  
30  
31  
32  
33  
34  
35  
36  
37  
38  
39  
40  
41  
42  
43  
44  
45  
46  
47

examine the association of refill adherence with hospitalization and healthcare costs among these patients.

*Wu et al[11]*  
2011  
US

To study statin adherence and assess associated medical utilisation and healthcare costs in patients with type 2 diabetes, based on national Medicaid database.

Design: Retrospective cohort study  
Follow Up: 1 year  
Sample Size: 1705 (A:624, NA:1081)

Measure: MPR  
Classification: MPR≥80 = adherent, MPR <80 = nonadherent  
Method of Assessment: pharmacy claims data

Total Healthcare Costs  
Pharmacy Costs  
Medical Costs

Type of Costs: adjusted  
Classification: all cause and disease state specific  
Currency Year: USD, 2005  
Cost of Nonadherence: all cause: THC:\$17807 (\$21370.30), PC:\$4915 (\$5898.52) MC:\$12892 (\$15471.77)  
Disease state specific: THC:\$2789 (\$3347.10), PC:\$489(\$586.85) MC:\$2300 (\$2760.25)

Quality: medium  
Classification: cost description

*Zhao et al[12]*  
2014  
US

To evaluate the associations between statin adherence level, healthcare costs, hospital admissions and emergency room visits after statin therapy is taken for 1 year.

Design: Retrospective cohort study  
Follow Up: 1 year  
Sample Size: 10312 (96-100: 2453, 90-95: 1496, 85-89: 584, 80-84: 768, 70-79: 960, 60-69: 777, 40-59: 1687, <40:1587)

Measure: MPR  
Classification: <40%, 40-59%, 60-69%, 70-79%, 80-84%, 85-89%, 90-95%, 96-100%  
Method of Assessment: pharmacy claims data, census data

Total Healthcare Costs  
Pharmacy Costs  
Medical Costs

Type of Costs: unadjusted  
Classification: all cause and disease state specific  
Currency Year: USD, 2010  
Cost of Nonadherence: all cause: PC(96-100):\$2976.80 (\$3247.04), PC(90-95):\$2826.99 (\$3083.63), PC(85-89):\$2795.39 (\$3049.16), PC(80-84):\$2690.89 (\$2935.17), PC(70-79):\$2192.83 (\$2391.90), PC(60-69):\$2323.27 (\$2534.18), PC(40-59):\$2153.93 (\$2349.47), PC(<40):\$1749.18 (\$1907.97)  
Disease state specific: THC(96-100):\$6536.05 (\$7129.40), THC(90-95):\$6493.80 (\$7083.31), THC(85-89):\$6459.40 (\$7045.79),

Quality: medium  
Classification: cost description

THC(80-84):\$6227.47 (\$6792.80),  
 THC(70-79):\$5713.47 (\$6232.14),  
 THC(60-69):\$5875.26 (\$6408.62),  
 THC(40-59):\$5817.58 (\$6345.70),  
 THC(<40):\$5249.12 (\$5725.64),  
 PC(96-100):\$449.86 (\$490.70), PC(90-95):\$439.74 (\$479.66),  
 PC(85-89):\$458.83 (\$500.48),  
 PC(80-84):\$423.15 (\$461.56),  
 PC(70-79):\$356.74 (\$389.13),  
 PC(60-69):\$371.30 (\$405.01),  
 PC(40-59):\$279.21 (\$304.56),  
 PC(<40):\$133.92 (\$146.08),  
 MC(96-100):\$3559.25 (\$3882.36),  
 MC(90-95):\$3666.81 (\$3999.69),  
 MC(85-89):\$3664 (\$3996.62), MC(80-84):\$3586.58 (\$3912.17), MC(70-79):\$3520.64 (\$3840.25), MC(60-69):\$3551.99 (\$3874.44), MC(40-59):\$3663.65 (\$3996.24),  
 MC(<40):\$3499.95 (\$3817.68)

For peer review

**Mental Health**

|                                                  |                                                                                                                                                                        |                                                                                                                            |                                                                                                                                                                 |                                                                                                        |                                                                                                                                                                                                                                                            |                                                                           |
|--------------------------------------------------|------------------------------------------------------------------------------------------------------------------------------------------------------------------------|----------------------------------------------------------------------------------------------------------------------------|-----------------------------------------------------------------------------------------------------------------------------------------------------------------|--------------------------------------------------------------------------------------------------------|------------------------------------------------------------------------------------------------------------------------------------------------------------------------------------------------------------------------------------------------------------|---------------------------------------------------------------------------|
| <p><i>Bagalman et al</i>[13]<br/>2010<br/>US</p> | <p>To examine the association between treatment adherence and indirect productivity costs within a cohort of commercially insured employees with bipolar disorder.</p> | <p><u>Design:</u> Retrospective cohort study<br/><u>Follow Up:</u> 1 year<br/><u>Sample Size:</u> 1258 (A:444, NA:814)</p> | <p><u>Measure:</u> MPR<br/><u>Classification:</u><br/>MPR≥80 = adherent, MPR &lt;80 = nonadherent<br/><u>Method of Assessment:</u><br/>pharmacy claims data</p> | <p>Total Costs<br/>Short term disability cost<br/>Workers compensation cost<br/>Paid time off cost</p> | <p><u>Type of Costs:</u> adjusted<br/><u>Classification:</u> disease state specific<br/><u>Currency Year:</u> USD, 2005<br/><u>Cost of Nonadherence:</u> TC:\$6894 (\$8273.53), STDC:\$2134 (\$2561.03), WCC:\$762 (\$914.48), PTOC:\$3998 (\$4798.03)</p> | <p><u>Quality:</u> medium<br/><u>Classification:</u> cost description</p> |
| <p><i>Becker et al</i>[14]</p>                   | <p>Examine treatment</p>                                                                                                                                               | <p><u>Design:</u> Retrospective</p>                                                                                        | <p><u>Measure:</u></p>                                                                                                                                          | <p>Total Costs</p>                                                                                     | <p><u>Type of Costs:</u> unadjusted</p>                                                                                                                                                                                                                    | <p><u>Quality:</u> low</p>                                                |

|    |                         |                          |                              |                            |                 |                                               |
|----|-------------------------|--------------------------|------------------------------|----------------------------|-----------------|-----------------------------------------------|
| 1  |                         |                          |                              |                            |                 |                                               |
| 2  |                         |                          |                              |                            |                 |                                               |
| 3  | 2007                    | outcomes and costs       | cohort study                 | prescription refill        |                 | <u>Classification:</u> disease state specific |
| 4  | US                      | associated with          | <u>Follow Up:</u> 2 years    | rate                       |                 | <u>Classification:</u> cost                   |
| 5  |                         | adherence rates by       | <u>Sample Size:</u> 10330    | <u>Classification:</u> 75- |                 | <u>Currency Year:</u> USD, 2006               |
| 6  |                         | antipsychotic            | (>75%:6609, 50-              | 100% = maximal             |                 | <u>Cost of Nonadherence</u> * :               |
| 7  |                         | medication class for     | 74%:1276, 25-                | adherence, 50-             |                 | TC(75-100):\$13564 (\$15792.91),              |
| 8  |                         | Medicaid beneficiaries.  | 49%:1940, <25%:505)          | 74.9% = moderate           |                 | TC(50-74):\$13772 (\$16035.09),               |
| 9  |                         |                          |                              | adherence, 25-             |                 | TC(25-49):\$15792 (\$18387.03),               |
| 10 |                         |                          |                              | 49.9% = minimal            |                 | TC(<25):\$16156 (\$18810.84)                  |
| 11 |                         |                          |                              | adherence, <25%            |                 |                                               |
| 12 |                         |                          |                              | = negligible               |                 |                                               |
| 13 |                         |                          |                              | adherence                  |                 |                                               |
| 14 |                         |                          |                              | <u>Method of</u>           |                 |                                               |
| 15 |                         |                          |                              | <u>Assessment:</u>         |                 |                                               |
| 16 |                         |                          |                              | pharmacy claims            |                 |                                               |
| 17 |                         |                          |                              | data                       |                 |                                               |
| 18 | <i>Eddy et al[15]</i>   | To evaluate the effect   | <u>Design:</u> Retrospective | <u>Measure:</u>            | Inpatient costs | <u>Type of Costs:</u> unadjusted              |
| 19 | 2005                    | of partial compliance    | database analysis            | continuous                 | Outpatient      | <u>Classification:</u> disease state specific |
| 20 | US                      | of patients with         | <u>Follow Up:</u> 1 year     | multiple interval          | costs           | <u>Currency Year:</u> USD, 2002               |
| 21 |                         | prescribed oral atypical | <u>Sample Size:</u> 7864     | medications                | Pharmacy        | <u>Cost of Nonadherence</u> * :               |
| 22 |                         | and conventional         | (<80%:2655, 80-              | available                  | costs           | IC:\$3780 (\$4906.39),                        |
| 23 |                         | antipsychotic agents     | 125%:5065,                   | <u>Classification:</u>     | Medical costs   | OC:\$504 (\$654.19),                          |
| 24 |                         | and the corresponding    | >125%:144)                   | <80% = partially           | Physician       | PC:\$1872 (\$2429.83),                        |
| 25 |                         | impact on resource       |                              | compliant, 80-             | office visit    | MC:\$6228 (\$8083.86),                        |
| 26 |                         | utilisation.             |                              | 125% = compliant,          | costs           | POC:\$1944 (\$2523.29)                        |
| 27 |                         |                          |                              | >125% = overly             | Other costs     | OtC:\$12 (\$15.58)                            |
| 28 |                         |                          |                              | compliant                  |                 |                                               |
| 29 |                         |                          |                              | <u>Method of</u>           |                 |                                               |
| 30 |                         |                          |                              | <u>Assessment:</u>         |                 |                                               |
| 31 |                         |                          |                              | pharmacy claims            |                 |                                               |
| 32 |                         |                          |                              | data                       |                 |                                               |
| 33 | <i>Gilmer et al[16]</i> | To evaluate the          | <u>Design:</u> Retrospective | <u>Measure:</u>            | Total costs     | <u>Type of Costs:</u> adjusted                |
| 34 | 2004                    | relationship between     | database analysis            | cumulative                 | Outpatient      | <u>Classification:</u> disease state specific |
| 35 | US                      | adherence to             | <u>Follow Up:</u> 1 year     | possession ratio           | costs           | <u>Currency Year:</u> USD, 1999               |
| 36 |                         |                          |                              |                            |                 | <u>Classification:</u> cost                   |
| 37 |                         |                          |                              |                            |                 | description                                   |
| 38 |                         |                          |                              |                            |                 |                                               |
| 39 |                         |                          |                              |                            |                 |                                               |
| 40 |                         |                          |                              |                            |                 |                                               |
| 41 |                         |                          |                              |                            |                 |                                               |
| 42 |                         |                          |                              |                            |                 |                                               |
| 43 |                         |                          |                              |                            |                 |                                               |
| 44 |                         |                          |                              |                            |                 |                                               |
| 45 |                         |                          |                              |                            |                 |                                               |
| 46 |                         |                          |                              |                            |                 |                                               |
| 47 |                         |                          |                              |                            |                 |                                               |



treatment with antipsychotic medication and health expenditures. Secondary objective was to identify risk factors predictive of non-adherence.

Sample Size: 1619 (<49%:388, 50-79%:259, 80-100%:664, >110%:308)

Classification: <49% = nonadherent, 50-79% = partially adherent, 80-100% = adherent, >110% = excess medication fillers

Pharmacy costs  
Hospitalization costs

Cost of Nonadherence:  
TC:\$8168 (\$11261.74),  
OC:\$3464 (\$4776.04),  
PC:\$1542 (\$2126.05),  
HC:\$3413 (\$4705.72)

Method of

Assessment:

pharmacy claims data

Hong et al[17]  
2011  
UK

To investigate clinical and economic consequences of medication non-adherence in the treatment of bipolar disorder following a manic or mixed episode.

Design: Prospective observational study  
Follow Up: 21 months  
Sample Size: 1341(A:1024, NA:317)

Measure: assessed by treating psychiatrist  
Classification: adherent vs. nonadherent  
Method of  
Assessment: observational assessment

Total costs  
Inpatient costs  
Outpatient costs  
Pharmacy costs  
Hospitalization costs

Type of Costs: unadjusted  
Classification: all cause and disease state specific  
Currency Year: GBP, 2008  
Cost of Nonadherence \*: all cause:  
PC:£55.43 (\$94.47)  
Disease state specific:  
TC:£5846.29 (\$9964.10)  
IC:£2740.57 (\$4670.88),  
OC:£1082.86 (\$1845.57),  
PC:£1630.29 (\$2778.58),  
HC:£337.14 (\$574.60)

Quality: medium  
Classification: cost description

Jiang et al[18]  
2015  
US

To estimate the impact of adherence to and persistence with atypical antipsychotics on healthcare costs and risk of hospitalization by controlling potential sources of endogeneity

Design: Retrospective cohort study  
Follow Up: 2 years  
Sample Size: 32374 (A:11642, NA:20732)

Measure: PDC  
Classification: (PDC≥80% = adherent, PDC<80% = nonadherent)  
Method of  
Assessment: medical and

Total costs  
Pharmacy costs  
Medical services costs

Type of Costs: unadjusted  
Classification: disease state specific  
Currency Year: USD, 2011  
Cost of Nonadherence:  
Disease state specific:  
TC:\$14141 (\$14517.37)  
PC:\$3971 (\$4076.69),  
MSC:\$10170 (\$10440.68)

Quality: low  
Classification: cost description

1  
2  
3  
4  
5  
6  
7  
8  
9  
10  
11  
12  
13  
14  
15  
16  
17  
18  
19  
20  
21  
22  
23  
24  
25  
26  
27  
28  
29  
30  
31  
32  
33  
34  
35  
36  
37  
38  
39  
40  
41  
42  
43  
44  
45  
46  
47

|                                                      |                                                                                                                                                        |                                                                                                                                               |                                                                                                                                                                                                                                                                                                                                                                          |                                                                    |                                                                                                                                                                                                                                                               |                                                                                   |
|------------------------------------------------------|--------------------------------------------------------------------------------------------------------------------------------------------------------|-----------------------------------------------------------------------------------------------------------------------------------------------|--------------------------------------------------------------------------------------------------------------------------------------------------------------------------------------------------------------------------------------------------------------------------------------------------------------------------------------------------------------------------|--------------------------------------------------------------------|---------------------------------------------------------------------------------------------------------------------------------------------------------------------------------------------------------------------------------------------------------------|-----------------------------------------------------------------------------------|
| <p><i>Joe et al[19]</i><br/>2016<br/>South Korea</p> | <p>To investigate the association between psychiatric medication non-compliance and psychiatric and non-psychiatric service utilisation and costs.</p> | <p><u>Design:</u> Retrospective cohort study<br/><u>Follow Up:</u> 1 year<br/><u>Sample Size:</u> 7848 (A:2774, NA:2774, P:1956, NP:1956)</p> | <p>pharmacy claims data<br/><u>Measure:</u> percentage of days of psychiatric prescription (PDP)<br/><u>Classification:</u> PDP≥80% = adherent, PDP&lt;80% = nonadherent; persistent = continued medication without interruption ≥ 56 day, non-persistent = at least one medication interruption &gt; 56 days<br/><u>Method of Assessment:</u> health insurance data</p> | <p>Total costs<br/>Inpatient costs<br/>External services costs</p> | <p><u>Type of Costs:</u> adjusted<br/><u>Classification:</u> all cause and disease state specific<br/><u>Currency Year:</u> USD, 2011<br/><u>Cost of Nonadherence:</u> all cause: TC:\$4961 (\$5271.40)<br/>Disease state specific: TC:\$3061 (\$3252.50)</p> | <p><u>Quality:</u> medium<br/><u>Classification:</u> cost outcome description</p> |
| <p><i>Knapp et al[20]</i><br/>2004<br/>UK</p>        | <p>To assess the relative impact of non-adherence and other factors associated with resource use and costs incurred by people with schizophrenia.</p>  | <p><u>Design:</u> Retrospective cohort study<br/><u>Follow Up:</u> 1 year<br/><u>Sample Size:</u> 658 (A:549, NA:109)</p>                     | <p><u>Measure:</u> self-report<br/><u>Classification:</u> adherent vs. nonadherent<br/><u>Method of Assessment:</u></p>                                                                                                                                                                                                                                                  | <p>Total costs<br/>Inpatient costs<br/>External services costs</p> | <p><u>Type of Costs:</u> predicted<br/><u>Classification:</u> disease state specific<br/><u>Currency Year:</u> GBP, 2001<br/><u>Cost of Nonadherence:</u> TC:£57580 (\$116434.12)<br/>IC:£6714 (\$13576.57), ESC:£1603 (\$3241.47)</p>                        | <p><u>Quality:</u> medium<br/><u>Classification:</u> cost analysis</p>            |

|    |                            |                         |                              |                         |                 |                                               |
|----|----------------------------|-------------------------|------------------------------|-------------------------|-----------------|-----------------------------------------------|
| 1  |                            |                         |                              |                         |                 |                                               |
| 2  |                            |                         |                              |                         |                 |                                               |
| 3  |                            |                         |                              |                         |                 |                                               |
| 4  |                            |                         | survey                       |                         |                 |                                               |
| 5  | <i>Offord et al[21]</i>    | To quantify early       | <u>Design:</u> Retrospective | <u>Measure:</u> time to | Total costs     | <u>Type of Costs:</u> adjusted                |
| 6  | 2013                       | nonadherence to         | cohort study                 | discontinuation         | Outpatient      | <u>Classification:</u> all cause and disease  |
| 7  | US                         | antipsychotic           | <u>Follow Up:</u> 1 year     | <u>Classification:</u>  | costs           | state specific                                |
| 8  |                            | medications in patients | <u>Sample Size:</u> 1462     | adherent vs.            | Pharmacy        | <u>Currency Year:</u> USD, 2008               |
| 9  |                            | with schizophrenia and  | (A:589, NA:873)              | nonadherent             | costs           | <u>Cost of Nonadherence:</u> all cause:       |
| 10 |                            | its impact on short-    |                              | <u>Method of</u>        | Hospitalization | TC:\$15400 (\$17132.34)                       |
| 11 |                            | term antipsychotic      |                              | <u>Assessment:</u>      | costs           | OC:\$5773 (\$6422.40),                        |
| 12 |                            | adherence, healthcare   |                              | pharmacy claims         |                 | PC:\$3777 (\$4201.87),                        |
| 13 |                            | utilisation and costs.  |                              | data                    |                 | HC:\$5850 (\$6508.06)                         |
| 14 |                            |                         |                              |                         |                 | Disease state specific:                       |
| 15 |                            |                         |                              |                         |                 | TC:\$5358 (\$5960.72)                         |
| 16 |                            |                         |                              |                         |                 | OC:\$858 (\$954.52),                          |
| 17 |                            |                         |                              |                         |                 | PC:\$1549 (\$1723.25),                        |
| 18 |                            |                         |                              |                         |                 | HC:\$2952 (\$3284.07)                         |
| 19 |                            |                         |                              |                         |                 |                                               |
| 20 |                            |                         |                              |                         |                 |                                               |
| 21 | <i>Offord et al[22]</i>    | To examine the impact   | <u>Design:</u> Retrospective | <u>Measure:</u> MPR     | Inpatient       | <u>Type of Costs:</u> adjusted                |
| 22 | 2013                       | of medication           | cohort study                 | <u>Classification:</u>  | costs           | <u>Classification:</u> all cause and disease  |
| 23 | US                         | adherence on            | <u>Follow Up:</u> 1 year     | MPR $\geq$ 70= high     | Pharmacy        | state specific                                |
| 24 |                            | healthcare utilisation  | <u>Sample Size:</u> 354      | adherence, MPR <        | costs           | <u>Currency Year:</u> USD, 2008               |
| 25 |                            | among Medicare          | (A:126, NA:228)              | 70 = low                |                 | <u>Cost of Nonadherence:</u> all cause:       |
| 26 |                            | insured schizophrenia   |                              | adherence               |                 | IC:\$9053 (\$10071.37),                       |
| 27 |                            | patients.               |                              | <u>Method of</u>        |                 | PC:\$4267 (\$4746.99),                        |
| 28 |                            |                         |                              | <u>Assessment:</u>      |                 | Disease state specific:                       |
| 29 |                            |                         |                              | pharmacy claims         |                 | IC:\$2468 (\$2745.62),                        |
| 30 |                            |                         |                              | data                    |                 | PC:\$1085 (\$1207.05)                         |
| 31 |                            |                         |                              |                         |                 |                                               |
| 32 | <i>Robertson et al[23]</i> | To examine the impact   | <u>Design:</u> Retrospective | <u>Measure:</u> MPR     | Total costs     | <u>Type of Costs:</u> unadjusted              |
| 33 | 2014                       | of the combination of   | cohort study                 | <u>Classification:</u>  | Inpatient costs | <u>Classification:</u> disease state specific |
| 34 | US                         | treatment utilization   | <u>Follow Up:</u> 90 days    | MPR $\geq$ 80% =        | Outpatient      | <u>Currency Year:</u> USD,2005                |
| 35 |                            | and medication          | <u>Sample Size:</u> 1376     | adherent                | costs           | <u>Cost of Nonadherence*:</u>                 |
| 36 |                            | possession on arrest    | (90/90:637, 60/90:240,       | <u>Method of</u>        | Emergency       | TC(90/90):\$28068 (\$33495.65),               |
| 37 |                            | and incarceration       | 30/90:174, 0/90:316)         | <u>Assessment:</u>      | department      | TC(60/90):\$21720 (\$25920.11),               |
| 38 |                            | outcomes and on         |                              | Medicaid claims         | costs           | TC(30/90):\$21084 (\$25161.12),               |
| 39 |                            | costs.                  |                              | data                    | Pharmacy        | TC(0/90):\$12516 (\$14936.28),                |
| 40 |                            |                         |                              |                         |                 |                                               |
| 41 |                            |                         |                              |                         |                 |                                               |
| 42 |                            |                         |                              |                         |                 |                                               |
| 43 |                            |                         |                              |                         |                 |                                               |
| 44 |                            |                         |                              |                         |                 |                                               |
| 45 |                            |                         |                              |                         |                 |                                               |
| 46 |                            |                         |                              |                         |                 |                                               |
| 47 |                            |                         |                              |                         |                 |                                               |

1  
2  
3  
4  
5  
6  
7  
8  
9  
10  
11  
12  
13  
14  
15  
16  
17  
18  
19  
20  
21  
22  
23  
24  
25  
26  
27  
28  
29  
30  
31  
32  
33  
34  
35  
36  
37  
38  
39  
40  
41  
42  
43  
44  
45  
46  
47

For peer review

|               |                                 |
|---------------|---------------------------------|
| costs         | IC(90/90):\$12168 (\$14520.99), |
| Target case   | IC(60/90):\$10068 (\$12014.90), |
| management    | IC(30/90):\$11376 (\$13575.84), |
| costs         | IC(0/90):\$5592 (\$6673.35),    |
| Psychiatric   | OC(90/90):\$6468 (\$7718.75),   |
| assessment    | OC(60/90):\$4152 (\$4954.89),   |
| costs         | OC(30/90):\$2916 (\$3479.88),   |
| Arrest costs  | OC(0/90):\$2136 (\$2549.05),    |
| Incarceration | EDC(90/90):\$96 (\$114.56),     |
| costs         | EDC(60/90):\$108 (\$128.88),    |
|               | EDC(30/90):\$144 (\$171.85),    |
|               | EDC(0/90):\$84 (\$100.24),      |
|               | PC(90/90):\$5316 (\$6343.98),   |
|               | PC(60/90):\$3468 (\$4138.63),   |
|               | PC(30/90):\$2232 (\$2663.61),   |
|               | PC(0/90):\$984 (\$1174.28),     |
|               | TCMC(90/90):\$2100 (\$2506.09), |
|               | TCMC(60/90):\$1404 (\$1675.50), |
|               | TCMC(30/90):\$1596 (\$1904.63), |
|               | TCMC(0/90):\$516 (\$615.78),    |
|               | PAC(90/90):\$240 (\$286.41),    |
|               | PAC(60/90):\$228 (\$272.09),    |
|               | PAC(30/90):\$204 (\$243.45),    |
|               | PAC(0/90):\$156 (\$186.17),     |
|               | ArC(90/90):\$780 (\$930.83),    |
|               | ArC(60/90):\$1032 (\$1231.56),  |
|               | ArC(30/90):\$1140 (\$1360.45),  |
|               | ArC(0/90):\$1200 (\$1432.05),   |
|               | InC(90/90):\$888 (\$1059.72),   |
|               | InC(60/90):\$1272 (\$1517.97),  |
|               | InC(30/90):\$1476 (\$1761.42),  |
|               | InC(0/90):\$1860 (\$2219.68)    |

|                           |                     |                              |                 |             |                                  |                        |
|---------------------------|---------------------|------------------------------|-----------------|-------------|----------------------------------|------------------------|
| <i>Robinson et al[24]</i> | To determine if the | <u>Design:</u> Retrospective | <u>Measure:</u> | Total costs | <u>Type of Costs:</u> unadjusted | <u>Quality:</u> medium |
|---------------------------|---------------------|------------------------------|-----------------|-------------|----------------------------------|------------------------|

|                                                                                                                         |                                  |                                                                                                                              |                                                                                                                       |                                                                                                                                                                                                                                         |                                                                                                         |                                                                                                                                                                                                                                                                                                                                                                                                                                                                                 |                                                                   |
|-------------------------------------------------------------------------------------------------------------------------|----------------------------------|------------------------------------------------------------------------------------------------------------------------------|-----------------------------------------------------------------------------------------------------------------------|-----------------------------------------------------------------------------------------------------------------------------------------------------------------------------------------------------------------------------------------|---------------------------------------------------------------------------------------------------------|---------------------------------------------------------------------------------------------------------------------------------------------------------------------------------------------------------------------------------------------------------------------------------------------------------------------------------------------------------------------------------------------------------------------------------------------------------------------------------|-------------------------------------------------------------------|
| 1<br>2<br>3<br>4<br>5<br>6<br>7<br>8<br>9<br>10<br>11<br>12<br>13<br>14<br>15<br>16<br>17<br>18<br>19<br>20<br>21<br>22 | 2006<br>US                       | type of antidepressant drug is related to adherence and assess the 6 month health care costs among newly diagnosed patients. | claims analysis<br><u>Follow Up:</u> 6 months<br><u>Sample Size:</u> 60386 (A:11526, NA:8860)                         | Antidepressant medication management measures<br><u>Classification:</u> meeting less than <3 medication management measures = nonadherent<br><u>Method of Assessment:</u> pharmacy claims data, Medicaid data, observational assessment | Inpatient costs<br>Outpatient costs<br>ED visit costs<br>Pharmacy costs<br>Physician office visit costs | <u>Classification:</u> all cause and disease state specific<br><u>Currency Year:</u> USD, 2004<br><u>Cost of Nonadherence*:</u> all cause:<br>TC:\$12658 (\$15678.21)<br>IC:\$3006 (\$3723.24),<br>OC:\$6118 (\$7577.76),<br>EDC:\$334 (\$413.69)<br>PC:\$3200 (\$3963.52),<br>POC:\$178 (\$220.47)<br>Disease state specific:<br>TC:\$2028 (\$2511.88)<br>IC:\$102 (\$126.34),<br>OC:\$734 (\$909.13),<br>EDC:\$18 (\$22.29)<br>PC:\$1174 (\$1454.12),<br>POC:\$120 (\$148.63) | <u>Classification:</u> cost description                           |
| 23<br>24<br>25<br>26<br>27<br>28<br>29<br>30<br>31<br>32<br>33<br>34<br>35<br>36<br>37                                  | Svarstad et al[25]<br>2001<br>US | To examine the relationship of medication non-adherence to hospital use and costs among severely mentally ill clients.       | <u>Design:</u> Retrospective database analysis<br><u>Follow Up:</u> 1 year<br><u>Sample Size:</u> 619 (A:413, NA:206) | <u>Measure:</u> quarter pharmacy claims<br><u>Classification:</u> one or more quarters without a claim = nonadherent<br><u>Method of Assessment:</u> pharmacy claims data, previous study data                                          | Hospitalization costs                                                                                   | <u>Type of Costs:</u> unadjusted<br><u>Classification:</u> all cause and disease state specific<br><u>Currency Year:</u> USD, 1990<br><u>Cost of Nonadherence:</u> all cause:<br>HC:\$3992 (\$6593.06)<br>Disease state specific:<br>Schizophrenia/schizo affective disorder:<br>HC:\$3421 (\$5650.01)<br>Bipolar disorder:<br>HC:\$9701 (\$16021.85),<br>Other severe mental illness:<br>HCD:\$3024 (\$4994.34)                                                                | <u>Quality:</u> medium<br><u>Classification:</u> cost description |
| 38<br>39<br>40<br>41<br>42<br>43<br>44<br>45<br>46<br>47                                                                | White et al[26]<br>2003<br>US    | To evaluate the economic impact of antidepressant                                                                            | <u>Design:</u> Retrospective database analysis<br><u>Follow Up:</u> 6 months                                          | <u>Measure:</u> MPR<br><u>Classification:</u> MPR≥70% =                                                                                                                                                                                 | Total costs<br>Pharmacy costs                                                                           | <u>Type of Costs:</u> adjusted<br><u>Classification:</u> disease state specific<br><u>Currency Year:</u> USD, 1999                                                                                                                                                                                                                                                                                                                                                              | <u>Quality:</u> medium<br><u>Classification:</u> cost description |

|    |                          |                          |                              |                        |                 |                                               |
|----|--------------------------|--------------------------|------------------------------|------------------------|-----------------|-----------------------------------------------|
| 1  |                          |                          |                              |                        |                 |                                               |
| 2  |                          |                          |                              |                        |                 |                                               |
| 3  |                          | treatment adherence      | <u>Sample Size:</u> 14190    | adherent,              | Medical costs   | <u>Cost of Nonadherence:</u>                  |
| 4  |                          | among patients           | (A:5638, NA:8552)            | MPR<70% =              |                 | TC:\$11815 (\$16290.09)                       |
| 5  |                          | treated for depression   |                              | nonadherent            |                 | PC:\$1123 (\$1548.35),                        |
| 6  |                          |                          |                              | <u>Method of</u>       |                 | MC:\$10692 (\$14741.74)                       |
| 7  |                          |                          |                              | <u>Assessment:</u>     |                 |                                               |
| 8  |                          |                          |                              | pharmacy claims        |                 |                                               |
| 9  |                          |                          |                              | data                   |                 |                                               |
| 10 |                          |                          |                              |                        |                 |                                               |
| 11 | <b>Diabetes</b>          |                          |                              |                        |                 |                                               |
| 12 | <i>An et al[27]</i>      | This study evaluated     | <u>Design:</u> Prospective   | <u>Measure:</u> MPR    | Total costs     | <u>Type of Costs:</u> unadjusted              |
| 13 | 2014                     | the association          | cohort study                 | <u>Classification:</u> | Outpatient      | <u>Classification:</u> disease state specific |
| 14 | Korea                    | between medication       | <u>Follow Up:</u> 3 years    | MPR≥90% =              | costs           | <u>Currency Year:</u> USD, 2007               |
| 15 |                          | adherence and            | <u>Sample Size:</u> 608      | adherent,              | Hospitalization | <u>Cost of Nonadherence*:</u>                 |
| 16 |                          | clinical/economic        | (A:472, NA:136)              | MPR<90% =              | costs           | TC:\$1657.11 (\$1884.14)                      |
| 17 |                          | outcomes in patients     |                              | nonadherent            |                 | OC: \$1413.99 (\$1608.20),                    |
| 18 |                          | with type II diabetes    |                              | <u>Method of</u>       |                 | HC: \$243.11 (\$276.12)                       |
| 19 |                          | mellitus in the republic |                              | <u>Assessment:</u>     |                 |                                               |
| 20 |                          | of Korea over 3 year     |                              | pharmacy claims        |                 |                                               |
| 21 |                          | period.                  |                              | data                   |                 |                                               |
| 22 |                          |                          |                              |                        |                 |                                               |
| 23 |                          |                          |                              |                        |                 |                                               |
| 24 | <i>Buysman et al[28]</i> | To examine the impact    | <u>Design:</u> Retrospective | <u>Measure:</u> PDC    | Pharmacy        | <u>Type of Costs:</u> unadjusted              |
| 25 | 2017                     | of real world            | database analysis            | <u>Classification:</u> | costs           | <u>Classification:</u> all cause and disease  |
| 26 | US                       | adherence on             | <u>Follow Up:</u> 12 months  | PDC≥80% = highly       |                 | state specific                                |
| 27 |                          | glycaemic control in     | <u>Sample Size:</u> 2261     | adherent,              |                 | <u>Currency Year:</u> USD, 2014               |
| 28 |                          | type 2 diabetes          | (A:1215, NA:1046)            | PDC<80% = less         |                 | <u>Cost of Nonadherence:</u> all cause:       |
| 29 |                          | patients treated with    |                              | than highly            |                 | PC: \$7225 (\$7297.39)                        |
| 30 |                          | canagliflozin.           |                              | adherent               |                 | Disease state specific:                       |
| 31 |                          |                          |                              | <u>Method of</u>       |                 | PC: \$4660 (\$4706.69)                        |
| 32 |                          |                          |                              | <u>Assessment:</u>     |                 |                                               |
| 33 |                          |                          |                              | healthcare claims      |                 |                                               |
| 34 |                          |                          |                              | data                   |                 |                                               |
| 35 |                          |                          |                              |                        |                 |                                               |
| 36 |                          |                          |                              |                        |                 |                                               |
| 37 | <i>Curtis et al[29]</i>  | Examine the              | <u>Design:</u> Retrospective | <u>Measure:</u> PDC    | Total costs     | <u>Type of Costs:</u> adjusted                |
| 38 | 2017                     | association between      | analysis                     | <u>Classification:</u> | Outpatient      | <u>Classification:</u> all cause              |
| 39 | US                       | adherence to glucose     | <u>Follow Up:</u> 3 years    | PDC≥80% =              | costs           | <u>Currency Year:</u> USD, 2014               |
| 40 |                          | lowering agents and      | <u>Sample Size:</u> 228074   | adherent,              | Pharmacy        | <u>Cost of Nonadherence:</u>                  |
| 41 |                          |                          |                              |                        |                 |                                               |
| 42 |                          |                          |                              |                        |                 |                                               |
| 43 |                          |                          |                              |                        |                 |                                               |
| 44 |                          |                          |                              |                        |                 |                                               |
| 45 |                          |                          |                              |                        |                 |                                               |
| 46 |                          |                          |                              |                        |                 |                                               |
| 47 |                          |                          |                              |                        |                 |                                               |

|    |                         |                         |                               |                        |                 |                                               |                             |
|----|-------------------------|-------------------------|-------------------------------|------------------------|-----------------|-----------------------------------------------|-----------------------------|
| 1  |                         |                         |                               |                        |                 |                                               |                             |
| 2  |                         |                         |                               |                        |                 |                                               |                             |
| 3  |                         | patient outcomes in an  | (A:117864, NA:110210)         | PDC<80% =              | costs           | TC:\$38633 (\$39020.09)                       |                             |
| 4  |                         | adult type 2 diabetes   |                               | nonadherent            | Acute care      | OC: \$16964 (\$17134),                        |                             |
| 5  |                         | population              |                               | <u>Method of</u>       | costs           | PC: \$9390 (\$9484.08),                       |                             |
| 6  |                         |                         |                               | <u>Assessment:</u>     |                 | ACC:\$12153 (\$12274.77)                      |                             |
| 7  |                         |                         |                               | healthcare claims      |                 |                                               |                             |
| 8  |                         |                         |                               | data                   |                 |                                               |                             |
| 9  |                         |                         |                               |                        |                 |                                               |                             |
| 10 | <i>Egede et al</i> [30] | To examine the          | <u>Design:</u> Retrospective  | <u>Measure:</u> MPR    | Inpatient costs | <u>Type of Costs:</u> unadjusted              | <u>Quality:</u> high        |
| 11 | 2012                    | longitudinal effects of | cohort study                  | <u>Classification:</u> | Outpatient      | <u>Classification:</u> disease state specific | <u>Classification:</u> cost |
| 12 | US                      | medication              | <u>Follow Up:</u> 5 years     | MPR≥80% =              | costs           | <u>Currency Year:</u> USD, 2006               | outcome                     |
| 13 |                         | nonadherence on key     | <u>Sample Size:</u> 740195    | adherent,              | Pharmacy        | <u>Cost of Nonadherence*:</u>                 | description                 |
| 14 |                         | costs and estimate      | (A:427390, NA:312805)         | MPR<80% =              | costs           | IC:\$14515.24 (\$17886.40)                    |                             |
| 15 |                         | potential savings from  |                               | nonadherent            |                 | OC: \$3599.27 (\$4434.16),                    |                             |
| 16 |                         | increased adherence     |                               | <u>Method of</u>       |                 | PC: \$1073.12 (\$1322.42)                     |                             |
| 17 |                         | using novel             |                               | <u>Assessment:</u>     |                 |                                               |                             |
| 18 |                         | methodology that        |                               | pharmacy claims        |                 |                                               |                             |
| 19 |                         | accounts for shared     |                               | data                   |                 |                                               |                             |
| 20 |                         | correlation among cost  |                               |                        |                 |                                               |                             |
| 21 |                         | categories.             |                               |                        |                 |                                               |                             |
| 22 |                         |                         |                               |                        |                 |                                               |                             |
| 23 |                         |                         |                               |                        |                 |                                               |                             |
| 24 | Gentil et al[31]        | To examine healthcare   | <u>Design:</u> Retrospective, | <u>Measure:</u> MPR    | Total costs     | <u>Type of Costs:</u> adjusted and unadjusted | <u>Quality:</u> medium      |
| 25 | 2015                    | costs associated with   | observational cohort          | <u>Classification:</u> | Inpatient costs | <u>Classification:</u> all cause and disease  | <u>Classification:</u> cost |
| 26 | Canada                  | adherence to oral       | analysis                      | MPR≥80% =              | Outpatient      | state specific                                | description                 |
| 27 |                         | antihyperglycemic       | <u>Follow Up:</u> 1 year      | adherent,              | costs           | <u>Currency Year:</u> CAD, 2010               |                             |
| 28 |                         | agents and the effects  | <u>Sample Size:</u> 301       | MPR<80% =              | Pharmacy        | <u>Cost of Nonadherence:</u>                  |                             |
| 29 |                         | of depression and       | (A:224, NA:77)                | nonadherent            | costs           | Adjusted all cause:                           |                             |
| 30 |                         | anxiety disorders on    |                               | <u>Method of</u>       | Physician       | TC:\$11124 (\$9818.67),                       |                             |
| 31 |                         | these in older adults   |                               | <u>Assessment:</u>     | office visit    | IC:\$7419 (\$6548.43)                         |                             |
| 32 |                         | with type 2 diabetes    |                               | pharmacy claims        | costs           | OC: \$2687 (\$2371.70),                       |                             |
| 33 |                         |                         |                               | data                   |                 | PC: \$504 (\$444.86),                         |                             |
| 34 |                         |                         |                               |                        |                 | POC:\$513 (\$452.80)                          |                             |
| 35 |                         |                         |                               |                        |                 | Adjusted disease state specific:              |                             |
| 36 |                         |                         |                               |                        |                 | TC:\$4477 (\$3951.65),                        |                             |
| 37 |                         |                         |                               |                        |                 | IC:\$2836 (\$2503.21)                         |                             |
| 38 |                         |                         |                               |                        |                 | OC: \$1518 (\$1339.87),                       |                             |
| 39 |                         |                         |                               |                        |                 |                                               |                             |
| 40 |                         |                         |                               |                        |                 |                                               |                             |
| 41 |                         |                         |                               |                        |                 |                                               |                             |
| 42 |                         |                         |                               |                        |                 |                                               |                             |
| 43 |                         |                         |                               |                        |                 |                                               |                             |
| 44 |                         |                         |                               |                        |                 |                                               |                             |
| 45 |                         |                         |                               |                        |                 |                                               |                             |
| 46 |                         |                         |                               |                        |                 |                                               |                             |
| 47 |                         |                         |                               |                        |                 |                                               |                             |

1  
2  
3  
4  
5  
6  
7  
8  
9  
10  
11  
12  
13  
14  
15  
16  
17  
18  
19  
20  
21  
22  
23  
24  
25  
26  
27  
28  
29  
30  
31  
32  
33  
34  
35  
36  
37  
38  
39  
40  
41  
42  
43  
44  
45  
46  
47

|                               |                                                                                                                            |                                                                                                                                       |                                                                                                                                                         |                                                                                    |                                                                                                                                                                                                                                                                                                                                                                                                                                                                                                                                                              |                                                                   |
|-------------------------------|----------------------------------------------------------------------------------------------------------------------------|---------------------------------------------------------------------------------------------------------------------------------------|---------------------------------------------------------------------------------------------------------------------------------------------------------|------------------------------------------------------------------------------------|--------------------------------------------------------------------------------------------------------------------------------------------------------------------------------------------------------------------------------------------------------------------------------------------------------------------------------------------------------------------------------------------------------------------------------------------------------------------------------------------------------------------------------------------------------------|-------------------------------------------------------------------|
|                               |                                                                                                                            |                                                                                                                                       |                                                                                                                                                         |                                                                                    | PC###: \$-444 (\$-391.90),<br>POC:\$568 (\$517.24)<br>Unadjusted all cause:<br>TC:\$14979 (\$13221.30),<br>IC:\$6351 (\$5605.75)<br>OC: \$4058 (\$3581.82),<br>PC: \$3503 (\$3091.94),<br>POC:\$1066 (\$940.91)<br>Unadjusted disease state specific:<br>TC:\$9008 (\$7950.97),<br>IC:\$2854 (\$2519.10)<br>OC: \$2654 (\$2342.57),<br>PC: \$2498 (\$2204.87),<br>POC:\$1002 (\$884.42)                                                                                                                                                                      |                                                                   |
| Hagen et al[32]<br>2014<br>US | To evaluate the relationships between compliance with oral hypoglycemic agents and healthcare/ short term disability costs | <u>Design:</u> Retrospective, observational cohort analysis<br><u>Follow Up:</u> 1 year<br><u>Sample Size:</u> 4978 (A:2820, NA:2158) | <u>Measure:</u> PDC<br><u>Classification:</u><br>PDC≥80% = compliant,<br>PDC<80% = noncompliant<br><u>Method of Assessment:</u><br>pharmacy claims data | Healthcare costs<br>Pharmacy costs<br>Medical costs<br>Short term disability costs | <u>Type of Costs:</u> adjusted and unadjusted<br><u>Classification:</u> all cause and disease state specific<br><u>Currency Year:</u> USD, 2003<br><u>Cost of Nonadherence:</u> Adjusted all cause:<br>PC: \$1668 (\$2065.99),<br>Adjusted disease state specific:<br>HC:\$7642 (\$9465.39), PC:\$614 (\$760.50), MC:\$5974 (\$7399.40),<br>STDC:\$1840 (\$2279.03)<br>Unadjusted all cause:<br>PC:\$1727 (\$2139.06)<br>Unadjusted disease state specific:<br>HC:\$6919 (\$8569.88), PC:\$785 (\$972.30), MC:\$5192 (\$6430.82),<br>STDC:\$1717 (\$2126.68) | <u>Quality:</u> medium<br><u>Classification:</u> cost description |
| Hansen et al[33]<br>2010      | To compare all cause total health care costs                                                                               | <u>Design:</u> Retrospective, cohort study                                                                                            | <u>Measure:</u> MPR<br><u>Classification:</u>                                                                                                           | Total Healthcare                                                                   | <u>Type of Costs:</u> adjusted and unadjusted<br><u>Classification:</u> all cause and disease                                                                                                                                                                                                                                                                                                                                                                                                                                                                | <u>Quality:</u> medium<br><u>Classification:</u> cost             |



|                                                                                                       |                                               |                                                                                                                                                                                                                                                                      |                                                                                                                                            |                                                                                                                                              |                                                                |                                                                                                                                                                                                                                                                                                                                                                                                                                                                                |                                                                         |
|-------------------------------------------------------------------------------------------------------|-----------------------------------------------|----------------------------------------------------------------------------------------------------------------------------------------------------------------------------------------------------------------------------------------------------------------------|--------------------------------------------------------------------------------------------------------------------------------------------|----------------------------------------------------------------------------------------------------------------------------------------------|----------------------------------------------------------------|--------------------------------------------------------------------------------------------------------------------------------------------------------------------------------------------------------------------------------------------------------------------------------------------------------------------------------------------------------------------------------------------------------------------------------------------------------------------------------|-------------------------------------------------------------------------|
| 1<br>2<br>3<br>4<br>5<br>6<br>7<br>8<br>9<br>10<br>11<br>12<br>13<br>14<br>15<br>16<br>17<br>18<br>19 | US                                            | and diabetes mellitus specific health care costs between patients who were adherent or non-adherent to monotherapy with metformin, pioglitazone or a sulfonylurea and to examine whether cost differences varied among patients using these oral antidiabetic drugs. | <u>Follow Up:</u> 2 years<br><u>Sample Size:</u> 108592 (A:63830, NA:44762)                                                                | MPR≥80% = adherent, MPR<80% = nonadherent<br><u>Method of Assessment:</u> pharmacy claims data                                               | costs<br>Inpatient costs<br>Outpatient costs<br>Pharmacy costs | state specific<br><u>Currency Year:</u> USD, 2005<br><u>Cost of Nonadherence#:</u> Adjusted all cause:<br>THC:\$13258 (\$15911.01)<br>Adjusted disease state specific:<br>THC:\$2284 (\$2741.04)<br>Unadjusted all cause:<br>THC:\$15448.50 (\$18539.90),<br>IC:\$4242.33 (\$5091.25),<br>OC:\$ 7377.83, PC:\$3828 (\$4594.01)<br>Unadjusted disease state specific:<br>THC:\$3232.33 (\$3879.15), IC:\$873.50 (\$1048.29), OC:\$1545.67(\$1854.96),<br>PC:\$812.67 (\$975.29) | description                                                             |
| 20<br>21<br>22<br>23<br>24<br>25<br>26<br>27<br>28<br>29<br>30<br>31                                  | <i>Hong et al</i> [34]<br>2011<br>South Korea | To assess the relationship between initial adherence to oral antihyperglycemic medications and subsequent health outcomes.                                                                                                                                           | <u>Design:</u> Retrospective, cohort study<br><u>Follow Up:</u> 3 years<br><u>Sample Size:</u> 40082 (A:11800, NA:28282)                   | <u>Measure:</u> MPR<br><u>Classification:</u> MPR≥80% = adherent, MPR<80% = nonadherent<br><u>Method of Assessment:</u> pharmacy claims data | Total costs<br>Hospitalization costs                           | <u>Type of Costs:</u> unadjusted<br><u>Classification:</u> disease state specific<br><u>Currency Year:</u> KRW, 2007<br><u>Cost of Nonadherence:</u> TC:₩765453 (\$1142.31),<br>HC:₩397549 (\$593.28)                                                                                                                                                                                                                                                                          | <u>Quality:</u> medium<br><u>Classification:</u> cost description       |
| 32<br>33<br>34<br>35<br>36<br>37<br>38<br>39<br>40<br>41<br>42<br>43<br>44<br>45<br>46<br>47          | <i>Jha et al</i> [35]<br>2012<br>US           | How often do previously non-adherent patients become adherent and vice versa? Are changes in adherence associated with increased or                                                                                                                                  | <u>Design:</u> Retrospective, observational claims analysis<br><u>Follow Up:</u> unclear<br><u>Sample Size:</u> 135639 (A:99976, NA:36553) | <u>Measure:</u> MPR<br><u>Classification:</u> MPR≥80% = adherent, MPR<80% = nonadherent<br><u>Method of Assessment:</u>                      | Total costs<br>ED costs<br>Hospitalization costs               | <u>Type of Costs:</u> adjusted<br><u>Classification:</u> disease state specific<br><u>Currency Year:</u> USD, 2011<br><u>Cost of Nonadherence***:</u> TC:\$4680000000 (\$5006563305.49),<br>EDC:\$735000000 (\$786287185.80),<br>HC:\$3950000000 (\$4225625012.11)                                                                                                                                                                                                             | <u>Quality:</u> high<br><u>Classification:</u> cost outcome description |

decreased pharmacy claims  
hospitalizations or data  
emergency  
department visits?

Are there certain  
subgroups of  
populations that seem  
to benefit more than  
others when they  
adhere to their  
medication?  
What are the financial  
implications of changes  
in adherence for the  
nation at large and for  
Medicare?

White et al[36]  
2004  
US

To assess the  
relationship between  
diabetic medication  
adherence, total  
healthcare costs and  
utilisation with  
patients with type 2  
diabetes mellitus and  
concomitant diabetes  
and cardiovascular  
disease.

Design: Retrospective,  
database analysis  
Follow Up: 1 year  
Sample Size: 67029  
(>95:20170, 75-95:  
14074, <75:16713)

Measure: MPR  
Classification:  
MPR≥95%,  
MPR>75%<95%,  
MPR<75%  
Method of  
Assessment:  
pharmacy claims  
data

Total costs  
Pharmacy  
costs  
Non-pharmacy  
costs

Type of Costs: adjusted and unadjusted  
Classification: disease state specific  
Currency Year: USD, 2000  
Cost of Nonadherence: adjusted:  
TC(≥95):\$4835 (\$6518.17),  
TC(75-95):\$5314 (\$7163.92),  
TC(<75):\$5706 (\$7692.38),  
PC(≥95):\$1429 (\$1926.47),  
PC(75-95):\$1157 (\$1559.78),  
PC(<75):\$762 (\$1027.27),  
NPC(≥95):\$3406 (\$4591.70),  
NPC(75-95):\$4157 (\$5604.14),  
NPC(<75):\$4944 (\$6665.11)  
Unadjusted:  
TC(≥95):\$4809 (\$6483.12),  
TC(75-95):\$5333 (\$7189.53),  
TC(<75):\$5605 (\$7556.22),

Quality: low  
Classification: cost  
analysis

1  
2  
3  
4  
5  
6  
7  
8  
9  
10 *Wu et al*[37]  
11 2009  
12 US

To examine the predictors of duloxetine compliance and its association with healthcare costs among diabetic peripheral neuropathic pain (DPNP) patients.

Design: Retrospective, cohort study  
Follow Up: 1 year  
Sample Size: 2354 (A:830, NA:1524)

Measure: MPR  
Classification: MPR $\geq$ 80%= high compliance, MPR<80% = low compliance  
Subgroup Analysis: commercial and Medicare supplemental  
Method of Assessment: pharmacy claims data

Total healthcare costs  
Inpatient costs  
Outpatient costs  
Pharmacy costs

PC( $\geq$ 95):\$1402 (\$1890.07),  
PC(75-95):\$1153 (\$1554.38),  
PC(<75):\$766 (\$1032.66),  
NPC( $\geq$ 95):\$3407 (\$4593.05),  
NPC(75-95):\$4180 (\$5635.15),  
NPC(<75):\$4839 (\$6523.56)  
Type of Costs: adjusted  
Classification: all cause and disease state specific  
Currency Year: USD, 2006  
Cost of Nonadherence: adjusted all cause:  
THC(com):\$32407 (\$37732.29),  
THC(med):\$24622 (\$28668.02),  
IC(com):\$ 12851(\$14692.74),  
IC(med):\$ 6754 (\$7863.85),  
OC(com):\$11888 (\$13841.50),  
OC(med):\$10598 (\$12339.52),  
PC(com):\$7667 (\$8926.88),  
PC(med):\$7270 (\$8464.65)  
Adjusted disease state specific:  
Diabetes:  
THC(com):\$10024 (\$11671.20),  
THC(med):\$5015 (\$5839.09),  
IC(com):\$2232 (\$2598.77),  
IC(med):\$2606 (\$3034.23),  
OC(com):\$1989 (\$2315.84),  
OC(med):\$1231 (\$1433.28),  
PC(com):\$1451 (\$1689.44),  
PC(med):\$1179 (\$1372.74)  
DPNP:  
THC(com):\$3565 (\$4150.82),  
THC(med):\$2384 (\$2775.75),

Quality: medium  
Classification: cost description

**Osteoporosis**

*Briesacher et al*[38]  
2007  
US

To assess rates of osteoporotic fractures and health care utilisation as a function of bisphosphonate compliance in usual clinical practice.

Design: Retrospective, cohort study  
Follow Up: 3 years  
Sample Size: 17988 (not specified)

Measure: MPR  
Classification: 80-100% = adherent, 60-79% = moderate adherence, 40-59% = moderate adherence, 20-39% = nonadherent, 0-19% = nonadherent  
Method of Assessment: pharmacy claims data

Total costs  
Inpatient costs  
Outpatient costs  
Pharmacy costs

IC(com):\$1739 (\$2024.76),  
IC(med):\$1048 (\$1220.21),  
OC(com):\$362 (\$421.49),  
OC(med):\$181 (\$210.74),  
PC(com):\$1464 (\$1704.57)  
PC(med):\$1155 (\$1344.80)

Type of Costs: adjusted and unadjusted  
Classification: disease state specific  
Currency Year: USD, 2004  
Cost of Nonadherence\*\*\*\*: adjusted:  
TC(80-100):-\$859 (-\$1063.96),  
TC(60-79):-\$474 (-\$587.10),  
TC(40-59):-\$366 (-\$453.33),  
TC(20-39):\$151 (\$187.03),  
IC(80-100):-\$3233 (-\$4004.40),  
IC(60-79):-\$856(-\$1060.24),  
IC(40-59):-\$6221 (-\$7705.34),  
IC(20-39):-\$585 (-\$724.58),  
OC(80-100):-\$445 (-\$551.18),  
OC(60-79):-\$538 (-\$666.37),  
OC(40-59):-\$236 (-\$292.31),  
OC(20-39):\$60 (\$74.32),  
PC(80-100):\$997 (\$1234.89),  
PC(60-79):\$923 (\$1143.23),  
PC(40-59):\$402 (\$497.92),  
PC(20-39):\$160(\$198.18)  
Unadjusted:  
TC(80-100):-\$1273 (-\$1576.74),  
TC(60-79):-\$294 (-\$364.15),  
TC(40-59):-\$573 (-\$709.72),  
TC(20-39):\$101 (\$125.10),  
IC(80-100):-\$883 (-\$1093.68),

Quality: medium  
Classification: cost description

|    |                             |                        |                              |                        |                                |                                              |
|----|-----------------------------|------------------------|------------------------------|------------------------|--------------------------------|----------------------------------------------|
| 1  |                             |                        |                              |                        |                                |                                              |
| 2  |                             |                        |                              |                        |                                |                                              |
| 3  |                             |                        |                              |                        |                                |                                              |
| 4  |                             |                        |                              |                        | IC(60-79):-\$384 (-\$475.62),  |                                              |
| 5  |                             |                        |                              |                        | IC(40-59):-\$597 (-\$739.44),  |                                              |
| 6  |                             |                        |                              |                        | IC(20-39):-\$93 (-\$115.19),   |                                              |
| 7  |                             |                        |                              |                        | OC(80-100):-\$774 (-\$958.68), |                                              |
| 8  |                             |                        |                              |                        | OC(60-79):-\$193 (-\$239.05),  |                                              |
| 9  |                             |                        |                              |                        | OC(40-59):-\$145 (-\$179.60),  |                                              |
| 10 |                             |                        |                              |                        | OC(20-39):\$148 (\$183.31),    |                                              |
| 11 |                             |                        |                              |                        | PC(80-100):\$384 (\$475.62),   |                                              |
| 12 |                             |                        |                              |                        | PC(60-79):\$284 (\$351.76),    |                                              |
| 13 |                             |                        |                              |                        | PC(40-59):\$170 (\$210.56),    |                                              |
| 14 |                             |                        |                              |                        | PC(20-39):\$48 (\$59.45)       |                                              |
| 15 |                             |                        |                              |                        |                                |                                              |
| 16 | <i>Eisenberg et al</i> [39] | To determine           | <u>Design:</u> Retrospective | <u>Measure:</u> MPR    | Total costs                    | <u>Type of Costs:</u> unadjusted             |
| 17 | 2015                        | healthcare outcomes    | claims study                 | <u>Classification:</u> | Inpatient costs                | <u>Classification:</u> all cause and disease |
| 18 | US                          | associated with        | <u>Follow Up:</u> 2 years    | (≥70% =                | Outpatient                     | state specific                               |
| 19 |                             | compliance and         | <u>Sample Size:</u> 27905    | compliant, <70%        | costs                          | <u>Currency Year:</u> USD, 2012              |
| 20 |                             | noncompliance to       | (A:11368, NA:16537)          | = noncompliant         | ED costs                       | <u>Cost of Nonadherence:</u> all cause:      |
| 21 |                             | bisphosphonate         |                              | <u>Method of</u>       | Pharmacy                       | TC:\$7237 (\$7550.72),                       |
| 22 |                             | therapy in women       |                              | <u>Assessment:</u>     | costs                          | IC:\$1986 (\$2072.09),                       |
| 23 |                             | diagnosed with         |                              | pharmacy claims        | Physician                      | OC:\$2057 (\$2146.17),                       |
| 24 |                             | osteoporosis           |                              | data                   | office visit                   | EDC:\$258 (\$269.18),                        |
| 25 |                             |                        |                              |                        | costs                          | PC:\$2197 (\$2292.24),                       |
| 26 |                             |                        |                              |                        |                                | POC:\$738 (\$769.99)                         |
| 27 |                             |                        |                              |                        |                                | Disease state specific:                      |
| 28 |                             |                        |                              |                        |                                | TC:\$674 (\$703.22),                         |
| 29 |                             |                        |                              |                        |                                | IC:\$334 (\$348.48),                         |
| 30 |                             |                        |                              |                        |                                | OC:\$77 (\$80.34),                           |
| 31 |                             |                        |                              |                        |                                | EDC:\$5 (\$5.22),                            |
| 32 |                             |                        |                              |                        |                                | PC:\$213 (\$222.23),                         |
| 33 |                             |                        |                              |                        |                                | POC:\$44 (\$45.91)                           |
| 34 |                             |                        |                              |                        |                                |                                              |
| 35 |                             |                        |                              |                        |                                |                                              |
| 36 |                             |                        |                              |                        |                                |                                              |
| 37 | <i>Halpern et al</i> [40]   | To examine the         | <u>Design:</u> Retrospective | <u>Measure:</u> MPR    | Medical costs                  | <u>Type of Costs:</u> unadjusted             |
| 38 | 2011                        | associations of        | analysis                     | <u>Classification:</u> |                                | <u>Classification:</u> all cause             |
| 39 | US                          | adherence to           | <u>Follow Up:</u> 540 days   | (≥80% = high           |                                | <u>Currency Year:</u> USD, 2006              |
| 40 |                             | osteoporosis therapies | <u>Sample Size:</u> 21655    | adherence,             |                                | <u>Cost of Nonadherence:</u> commercial:     |
| 41 |                             |                        |                              |                        |                                | description                                  |
| 42 |                             |                        |                              |                        |                                |                                              |
| 43 |                             |                        |                              |                        |                                |                                              |
| 44 |                             |                        |                              |                        |                                |                                              |
| 45 |                             |                        |                              |                        |                                |                                              |
| 46 |                             |                        |                              |                        |                                |                                              |
| 47 |                             |                        |                              |                        |                                |                                              |

|    |                    |                        |                              |                        |                 |                                                   |                             |
|----|--------------------|------------------------|------------------------------|------------------------|-----------------|---------------------------------------------------|-----------------------------|
| 1  |                    |                        |                              |                        |                 |                                                   |                             |
| 2  |                    |                        |                              |                        |                 |                                                   |                             |
| 3  |                    |                        |                              |                        |                 |                                                   |                             |
| 4  |                    | with occurrence of     | (≥80%:8759,                  | ≥50<80% =              |                 | MC(≥80):\$4295 (\$5000.78),                       |                             |
| 5  |                    | closed fracture, all   | ≥50<80%:5237,                | moderate               |                 | MC(50-80):\$4697 (\$5468.84),                     |                             |
| 6  |                    | cause medical costs    | <50%:7659)                   | adherence, <50%        |                 | MC(<50):\$5596 (\$6515.56)                        |                             |
| 7  |                    | and all cause          |                              | = low adherence        |                 | Medicare:                                         |                             |
| 8  |                    | hospitalizations.      |                              | <u>Method of</u>       |                 | MC(≥80):\$4590 (\$5344.25),                       |                             |
| 9  |                    |                        |                              | <u>Assessment:</u>     |                 | MC(50-80):\$5536 (\$6445.71),                     |                             |
| 10 |                    |                        |                              | pharmacy claims        |                 | MC(<50):\$5801 (\$6754.25)                        |                             |
| 11 |                    |                        |                              | data                   |                 |                                                   |                             |
| 12 |                    |                        |                              |                        |                 |                                                   |                             |
| 13 | Hazel-Fernandez et | To evaluate the        | <u>Design:</u> Retrospective | <u>Measure:</u> PDC    | Total           | <u>Type of Costs:</u> unadjusted                  | <u>Quality:</u> medium      |
| 14 | al[41]             | healthcare utilisation | cohort study                 | <u>Classification:</u> | healthcare      | <u>Classification:</u> disease state specific and | <u>Classification:</u> cost |
| 15 | 2013               | patterns of medicare   | <u>Follow Up:</u> 12 months  | (≥80% = high           | costs           | fracture related                                  | outcome                     |
| 16 | US                 | part D beneficiaries   | <u>Sample Size:</u> 761      | adherence,             | Inpatient costs | <u>Currency Year:</u> USD, 2010                   | description                 |
| 17 |                    | newly initiating       | (≥80%:163,                   | ≥50<80% =              | Outpatient      | <u>Cost of Nonadherence</u> * :                   |                             |
| 18 |                    | teriparatide and to    | ≥50<80%:57,                  | moderate               | costs           | Disease state specific:                           |                             |
| 19 |                    | assess the association | <50%:541)                    | adherence, <50%        | ED costs        | THC(≥80):\$21033 (\$22942.39),                    |                             |
| 20 |                    | of medication          |                              | = low adherence        | Pharmacy        | THC(50-80):\$25574 (\$27895.62),                  |                             |
| 21 |                    | adherence and          |                              | <u>Method of</u>       | costs           | THC(<50):\$15528 (\$16937.64),                    |                             |
| 22 |                    | persistence with bone  |                              | <u>Assessment:</u>     |                 | IC(≥80):\$2198 (\$2397.54),                       |                             |
| 23 |                    | fracture.              |                              | pharmacy claims        |                 | IC(50-80):\$8448 (\$9214.91),                     |                             |
| 24 |                    |                        |                              | data                   |                 | IC(<50):\$4897 (\$5341.55),                       |                             |
| 25 |                    |                        |                              |                        |                 | OC(≥80):\$5151 (\$5618.61),                       |                             |
| 26 |                    |                        |                              |                        |                 | OC(50-80):\$6439 (\$7023.54),                     |                             |
| 27 |                    |                        |                              |                        |                 | OC(<50):\$5806 (\$6333.07),                       |                             |
| 28 |                    |                        |                              |                        |                 | EDC(≥80):\$211 (\$230.15),                        |                             |
| 29 |                    |                        |                              |                        |                 | EDC(50-80):\$330 (\$359.96),                      |                             |
| 30 |                    |                        |                              |                        |                 | EDC(<50):\$465 (\$507.21),                        |                             |
| 31 |                    |                        |                              |                        |                 | PC(≥80):\$13472 (\$14695),                        |                             |
| 32 |                    |                        |                              |                        |                 | PC(50-80):\$10358 (\$11298.31),                   |                             |
| 33 |                    |                        |                              |                        |                 | PC(<50):\$4361 (\$4756.89)                        |                             |
| 34 |                    |                        |                              |                        |                 | Fracture related:                                 |                             |
| 35 |                    |                        |                              |                        |                 | THC(≥80):\$12670 (\$13820.19),                    |                             |
| 36 |                    |                        |                              |                        |                 | THC(50-80):\$9292 (\$10135.53),                   |                             |
| 37 |                    |                        |                              |                        |                 | THC(<50):\$4419 (\$4820.16),                      |                             |
| 38 |                    |                        |                              |                        |                 |                                                   |                             |
| 39 |                    |                        |                              |                        |                 |                                                   |                             |
| 40 |                    |                        |                              |                        |                 |                                                   |                             |
| 41 |                    |                        |                              |                        |                 |                                                   |                             |
| 42 |                    |                        |                              |                        |                 |                                                   |                             |
| 43 |                    |                        |                              |                        |                 |                                                   |                             |
| 44 |                    |                        |                              |                        |                 |                                                   |                             |
| 45 |                    |                        |                              |                        |                 |                                                   |                             |
| 46 |                    |                        |                              |                        |                 |                                                   |                             |
| 47 |                    |                        |                              |                        |                 |                                                   |                             |

|    |                              |                                                                                                                                                                   |                                                                                                                        |                                                                                                                                                   |                                                     |                                                                                                                                                                                                                                                                                          |                                                                         |
|----|------------------------------|-------------------------------------------------------------------------------------------------------------------------------------------------------------------|------------------------------------------------------------------------------------------------------------------------|---------------------------------------------------------------------------------------------------------------------------------------------------|-----------------------------------------------------|------------------------------------------------------------------------------------------------------------------------------------------------------------------------------------------------------------------------------------------------------------------------------------------|-------------------------------------------------------------------------|
| 1  |                              |                                                                                                                                                                   |                                                                                                                        |                                                                                                                                                   |                                                     |                                                                                                                                                                                                                                                                                          |                                                                         |
| 2  |                              |                                                                                                                                                                   |                                                                                                                        |                                                                                                                                                   |                                                     |                                                                                                                                                                                                                                                                                          |                                                                         |
| 3  |                              |                                                                                                                                                                   |                                                                                                                        |                                                                                                                                                   |                                                     |                                                                                                                                                                                                                                                                                          |                                                                         |
| 4  |                              |                                                                                                                                                                   |                                                                                                                        |                                                                                                                                                   |                                                     | IC( $\geq$ 80):\$366 (\$399.23),                                                                                                                                                                                                                                                         |                                                                         |
| 5  |                              |                                                                                                                                                                   |                                                                                                                        |                                                                                                                                                   |                                                     | IC(50-80):\$830 (\$905.35),                                                                                                                                                                                                                                                              |                                                                         |
| 6  |                              |                                                                                                                                                                   |                                                                                                                        |                                                                                                                                                   |                                                     | IC(<50):\$1325 (\$1445.28),                                                                                                                                                                                                                                                              |                                                                         |
| 7  |                              |                                                                                                                                                                   |                                                                                                                        |                                                                                                                                                   |                                                     | OC( $\geq$ 80):\$1048 (\$1143.14),                                                                                                                                                                                                                                                       |                                                                         |
| 8  |                              |                                                                                                                                                                   |                                                                                                                        |                                                                                                                                                   |                                                     | OC(50-80):\$955 (\$1041.70),                                                                                                                                                                                                                                                             |                                                                         |
| 9  |                              |                                                                                                                                                                   |                                                                                                                        |                                                                                                                                                   |                                                     | OC(<50):\$767 (\$836.63),                                                                                                                                                                                                                                                                |                                                                         |
| 10 |                              |                                                                                                                                                                   |                                                                                                                        |                                                                                                                                                   |                                                     | EDC( $\geq$ 80):\$6 (\$6.54),                                                                                                                                                                                                                                                            |                                                                         |
| 11 |                              |                                                                                                                                                                   |                                                                                                                        |                                                                                                                                                   |                                                     | EDC(50-80):\$9 (\$9.82),                                                                                                                                                                                                                                                                 |                                                                         |
| 12 |                              |                                                                                                                                                                   |                                                                                                                        |                                                                                                                                                   |                                                     | EDC(<50):\$44 (\$47.99),                                                                                                                                                                                                                                                                 |                                                                         |
| 13 |                              |                                                                                                                                                                   |                                                                                                                        |                                                                                                                                                   |                                                     | PC( $\geq$ 80):\$10810 (\$11791.34),                                                                                                                                                                                                                                                     |                                                                         |
| 14 |                              |                                                                                                                                                                   |                                                                                                                        |                                                                                                                                                   |                                                     | PC(50-80):\$7420 (\$8093.59),                                                                                                                                                                                                                                                            |                                                                         |
| 15 |                              |                                                                                                                                                                   |                                                                                                                        |                                                                                                                                                   |                                                     | PC(<50):\$2068 (\$2255.73)                                                                                                                                                                                                                                                               |                                                                         |
| 16 |                              |                                                                                                                                                                   |                                                                                                                        |                                                                                                                                                   |                                                     |                                                                                                                                                                                                                                                                                          |                                                                         |
| 17 | <i>Huybrechts et al</i> [42] | To evaluate non-compliance with osteoporosis medications as well as its implications for health and economic outcomes in actual practice.                         | <u>Design:</u> Retrospective cohort study<br><u>Follow Up:</u> 5 years<br><u>Sample Size:</u> 38120 (A:9530, NA:28590) | <u>Measure:</u> MPR<br><u>Classification:</u> ( $\geq$ 80% = compliant, <50% = noncompliant)<br><u>Method of Assessment:</u> pharmacy claims data | Total costs<br>Medical costs<br>Institutional costs | <u>Type of Costs:</u> unadjusted<br><u>Classification:</u> disease state specific<br><u>Currency Year:</u> USD, 2000<br><u>Cost of Nonadherence:</u> TC:\$7200 (\$9706.44), MC:\$1476 (\$1989.84), InstC:\$5736 (\$7732.80)                                                              | <u>Quality:</u> low<br><u>Classification:</u> cost description          |
| 18 | 2006                         |                                                                                                                                                                   |                                                                                                                        |                                                                                                                                                   |                                                     |                                                                                                                                                                                                                                                                                          |                                                                         |
| 19 | US                           |                                                                                                                                                                   |                                                                                                                        |                                                                                                                                                   |                                                     |                                                                                                                                                                                                                                                                                          |                                                                         |
| 20 |                              |                                                                                                                                                                   |                                                                                                                        |                                                                                                                                                   |                                                     |                                                                                                                                                                                                                                                                                          |                                                                         |
| 21 |                              |                                                                                                                                                                   |                                                                                                                        |                                                                                                                                                   |                                                     |                                                                                                                                                                                                                                                                                          |                                                                         |
| 22 |                              |                                                                                                                                                                   |                                                                                                                        |                                                                                                                                                   |                                                     |                                                                                                                                                                                                                                                                                          |                                                                         |
| 23 |                              |                                                                                                                                                                   |                                                                                                                        |                                                                                                                                                   |                                                     |                                                                                                                                                                                                                                                                                          |                                                                         |
| 24 |                              |                                                                                                                                                                   |                                                                                                                        |                                                                                                                                                   |                                                     |                                                                                                                                                                                                                                                                                          |                                                                         |
| 25 |                              |                                                                                                                                                                   |                                                                                                                        |                                                                                                                                                   |                                                     |                                                                                                                                                                                                                                                                                          |                                                                         |
| 26 |                              |                                                                                                                                                                   |                                                                                                                        |                                                                                                                                                   |                                                     |                                                                                                                                                                                                                                                                                          |                                                                         |
| 27 | <i>Kjellberge al</i> [43]    | To estimate the rate of oral bisphosphonate compliance among Danish women and to examine the association of noncompliance with health care resource use and cost. | <u>Design:</u> Retrospective cohort study<br><u>Follow Up:</u> 1 year<br><u>Sample Size:</u> 38234 (A:26806, NA:11428) | <u>Measure:</u> MPR<br><u>Classification:</u> ( $\geq$ 70% = compliant, <70% = noncompliant)<br><u>Method of Assessment:</u> pharmacy claims data | Total costs<br>Medical costs                        | <u>Type of Costs:</u> adjusted<br><u>Classification:</u> all cause and disease state specific<br><u>Currency Year:</u> Euro, 2011<br><u>Cost of Nonadherence:</u> all cause: TC:€4933 (\$6209.58), MC:€3471 (\$4369.20), Disease state specific: TC:€754 (\$949.12), MC:€426 (\$536.24), | <u>Quality:</u> high<br><u>Classification:</u> cost outcome description |
| 28 | 2016                         |                                                                                                                                                                   |                                                                                                                        |                                                                                                                                                   |                                                     |                                                                                                                                                                                                                                                                                          |                                                                         |
| 29 | Denmark                      |                                                                                                                                                                   |                                                                                                                        |                                                                                                                                                   |                                                     |                                                                                                                                                                                                                                                                                          |                                                                         |
| 30 |                              |                                                                                                                                                                   |                                                                                                                        |                                                                                                                                                   |                                                     |                                                                                                                                                                                                                                                                                          |                                                                         |
| 31 |                              |                                                                                                                                                                   |                                                                                                                        |                                                                                                                                                   |                                                     |                                                                                                                                                                                                                                                                                          |                                                                         |
| 32 |                              |                                                                                                                                                                   |                                                                                                                        |                                                                                                                                                   |                                                     |                                                                                                                                                                                                                                                                                          |                                                                         |
| 33 |                              |                                                                                                                                                                   |                                                                                                                        |                                                                                                                                                   |                                                     |                                                                                                                                                                                                                                                                                          |                                                                         |
| 34 |                              |                                                                                                                                                                   |                                                                                                                        |                                                                                                                                                   |                                                     |                                                                                                                                                                                                                                                                                          |                                                                         |
| 35 |                              |                                                                                                                                                                   |                                                                                                                        |                                                                                                                                                   |                                                     |                                                                                                                                                                                                                                                                                          |                                                                         |
| 36 |                              |                                                                                                                                                                   |                                                                                                                        |                                                                                                                                                   |                                                     |                                                                                                                                                                                                                                                                                          |                                                                         |
| 37 |                              |                                                                                                                                                                   |                                                                                                                        |                                                                                                                                                   |                                                     |                                                                                                                                                                                                                                                                                          |                                                                         |
| 38 |                              |                                                                                                                                                                   |                                                                                                                        |                                                                                                                                                   |                                                     |                                                                                                                                                                                                                                                                                          |                                                                         |
| 39 | <i>Modi et al</i> [44]       | To evaluate compliance with                                                                                                                                       | <u>Design:</u> Retrospective cohort study                                                                              | <u>Measure:</u> MPR<br><u>Classification:</u>                                                                                                     | Total costs<br>Inpatient costs                      | <u>Type of Costs:</u> unadjusted<br><u>Classification:</u> all cause and disease                                                                                                                                                                                                         | <u>Quality:</u> medium<br><u>Classification:</u> cost                   |
| 40 | 2015                         |                                                                                                                                                                   |                                                                                                                        |                                                                                                                                                   |                                                     |                                                                                                                                                                                                                                                                                          |                                                                         |
| 41 |                              |                                                                                                                                                                   |                                                                                                                        |                                                                                                                                                   |                                                     |                                                                                                                                                                                                                                                                                          |                                                                         |
| 42 |                              |                                                                                                                                                                   |                                                                                                                        |                                                                                                                                                   |                                                     |                                                                                                                                                                                                                                                                                          |                                                                         |
| 43 |                              |                                                                                                                                                                   |                                                                                                                        |                                                                                                                                                   |                                                     |                                                                                                                                                                                                                                                                                          |                                                                         |
| 44 |                              |                                                                                                                                                                   |                                                                                                                        |                                                                                                                                                   |                                                     |                                                                                                                                                                                                                                                                                          |                                                                         |
| 45 |                              |                                                                                                                                                                   |                                                                                                                        |                                                                                                                                                   |                                                     |                                                                                                                                                                                                                                                                                          |                                                                         |
| 46 |                              |                                                                                                                                                                   |                                                                                                                        |                                                                                                                                                   |                                                     |                                                                                                                                                                                                                                                                                          |                                                                         |
| 47 |                              |                                                                                                                                                                   |                                                                                                                        |                                                                                                                                                   |                                                     |                                                                                                                                                                                                                                                                                          |                                                                         |

|    |                         |                        |                              |                        |                |                                               |
|----|-------------------------|------------------------|------------------------------|------------------------|----------------|-----------------------------------------------|
| 1  |                         |                        |                              |                        |                |                                               |
| 2  |                         |                        |                              |                        |                |                                               |
| 3  | US                      | osteoporosis           | <u>Follow Up:</u> 1 year     | (≥80% =                | Outpatient     | state specific                                |
| 4  |                         | treatments and         | <u>Sample Size:</u> 27913    | compliant, <80%        | costs          | <u>Currency Year:</u> USD, 2011               |
| 5  |                         | determine fracture and | (A:23430, NA:34483)          | = noncompliant)        | ED costs       | <u>Cost of Nonadherence:</u> all cause:       |
| 6  |                         | healthcare burden      |                              | <u>Method of</u>       | Pharmacy       | TC:\$11749 (\$12484.12),                      |
| 7  |                         | associated with        |                              | <u>Assessment:</u>     | costs          | IC:\$8768 (\$9316.60),                        |
| 8  |                         | noncompliance          |                              | healthcare claims      | Medical costs  | OC:\$3945 (\$4191.83),                        |
| 9  |                         |                        |                              | data                   | Other costs    | EDC:\$104 (\$110.51),                         |
| 10 |                         |                        |                              |                        |                | PC:\$2981 (\$3167.52),                        |
| 11 |                         |                        |                              |                        |                | MC:\$8768 (\$9316.60),                        |
| 12 |                         |                        |                              |                        |                | OtC:\$997 (\$1059.38)                         |
| 13 |                         |                        |                              |                        |                | Disease state specific:                       |
| 14 |                         |                        |                              |                        |                | TC:\$630 (\$669.42),                          |
| 15 |                         |                        |                              |                        |                | IC:\$443 (\$470.72),                          |
| 16 |                         |                        |                              |                        |                | OC:\$158 (\$167.89),                          |
| 17 |                         |                        |                              |                        |                | EDC:\$3 (\$3.19),                             |
| 18 |                         |                        |                              |                        |                | PC:\$325 (\$345.33),                          |
| 19 |                         |                        |                              |                        |                | OtC:\$26 (\$27.63)                            |
| 20 |                         |                        |                              |                        |                |                                               |
| 21 |                         |                        |                              |                        |                |                                               |
| 22 |                         |                        |                              |                        |                |                                               |
| 23 | <i>Olsen et al</i> [45] | To assess the          | <u>Design:</u> Retrospective | <u>Measure:</u> MPR    | Fracture costs | <u>Type of Costs:</u> unadjusted              |
| 24 | 2013                    | association between    | observational study          | <u>Classification:</u> |                | <u>Classification:</u> fracture site specific |
| 25 | Denmark                 | refill compliance and  | <u>Follow Up:</u> 2 years    | (≥80% = optimal        |                | <u>Currency Year:</u> DKK, 2010               |
| 26 |                         | all cause health care  | <u>Sample Size:</u> 47176    | compliance,            |                | <u>Cost of Nonadherence:</u>                  |
| 27 |                         | costs.                 | (not specified)              | >50<80% =              |                | Hip fracture:                                 |
| 28 |                         |                        |                              | suboptimal             |                | FC(50-80):kr817575.50 (\$74531.41),           |
| 29 |                         |                        |                              | compliance, <50%       |                | FC(<50):kr4454954 (\$549987.04)               |
| 30 |                         |                        |                              | = low compliance       |                | Spine fracture:                               |
| 31 |                         |                        |                              | <u>Method of</u>       |                | FC(50-80):kr174700 (\$21568.12),              |
| 32 |                         |                        |                              | <u>Assessment:</u>     |                | FC(<50):kr226472 (\$27959.14)                 |
| 33 |                         |                        |                              | pharmacy claims        |                | Humerus fracture:                             |
| 34 |                         |                        |                              | data                   |                | FC(50-80):kr117776.50 (\$14540.12),           |
| 35 |                         |                        |                              |                        |                | FC(<50):kr795217.50 (\$98173.70)              |
| 36 |                         |                        |                              |                        |                | Forearm fracture:                             |
| 37 |                         |                        |                              |                        |                | FC(50-80):-kr463024 (-\$57162.70),            |
| 38 |                         |                        |                              |                        |                | FC(<50):kr45072.50 (\$8665.81)                |
| 39 |                         |                        |                              |                        |                |                                               |
| 40 |                         |                        |                              |                        |                |                                               |
| 41 |                         |                        |                              |                        |                |                                               |
| 42 |                         |                        |                              |                        |                |                                               |
| 43 |                         |                        |                              |                        |                |                                               |
| 44 |                         |                        |                              |                        |                |                                               |
| 45 |                         |                        |                              |                        |                |                                               |
| 46 |                         |                        |                              |                        |                |                                               |
| 47 |                         |                        |                              |                        |                |                                               |



|    |                          |                           |                              |                        |                                     |                                               |
|----|--------------------------|---------------------------|------------------------------|------------------------|-------------------------------------|-----------------------------------------------|
| 1  |                          |                           |                              |                        |                                     |                                               |
| 2  |                          |                           |                              |                        |                                     |                                               |
| 3  |                          |                           |                              |                        |                                     |                                               |
| 4  |                          |                           |                              |                        | Other fracture:                     |                                               |
| 5  |                          |                           |                              |                        | FC(50-80):-kr19261.50 (-\$2377.93), |                                               |
| 6  |                          |                           |                              |                        | FC(<50):kr684067.50 (\$84451.66)    |                                               |
| 7  | <i>Sunycz et al</i> [46] | To examine the            | <u>Design:</u> Retrospective | <u>Measure:</u> MPR    | Total                               | <u>Type of Costs:</u> unadjusted              |
| 8  | 2008                     | relationship between      | observational study          | <u>Classification:</u> | healthcare                          | <u>Classification:</u> all cause and disease  |
| 9  | US                       | persistence and           | <u>Follow Up:</u> 3 years    | (≥80% =                | costs                               | state specific                                |
| 10 |                          | compliance with           | <u>Sample Size:</u> 32944    | compliant, <80%        | Inpatient costs                     | <u>Currency Year:</u> USD, 2005               |
| 11 |                          | bisphosphonate            | (A:12186, NA:20758)          | = noncompliant)        | Outpatient                          | <u>Cost of Nonadherence:</u>                  |
| 12 |                          | therapy and total and     |                              | <u>Method of</u>       | costs                               | All cause:                                    |
| 13 |                          | osteoporosis related      |                              | <u>Assessment:</u>     | ED costs                            | THC:\$23660 (\$28394.52),                     |
| 14 |                          | costs and healthcare      |                              | pharmacy claims        | Pharmacy                            | IC:\$18839 (\$22608.81),                      |
| 15 |                          | resource utilisation in a |                              | data                   | costs                               | OC:\$10061 (\$12074.27),                      |
| 16 |                          | cohort of female          |                              |                        | Radiology                           | EDC:\$832 (\$988.49),                         |
| 17 |                          | bisphosphonate naïve      |                              |                        | costs                               | PC:\$6941 (\$8329.94),                        |
| 18 |                          | users.                    |                              |                        |                                     | RC:\$1079 (\$1294.91)                         |
| 19 |                          |                           |                              |                        |                                     | Disease state specific:                       |
| 20 |                          |                           |                              |                        |                                     | THC:\$1602 (\$1922.57),                       |
| 21 |                          |                           |                              |                        |                                     | IC:\$14074 (\$16890.30),                      |
| 22 |                          |                           |                              |                        |                                     | OC:\$501 (\$601.25),                          |
| 23 |                          |                           |                              |                        |                                     | EDC:\$452 (\$542.45),                         |
| 24 |                          |                           |                              |                        |                                     | PC:\$918 (\$1101.70),                         |
| 25 |                          |                           |                              |                        |                                     | RC:\$184 (\$220.82)                           |
| 26 |                          |                           |                              |                        |                                     | <u>Type of Costs:</u> adjusted and unadjusted |
| 27 |                          |                           |                              |                        |                                     | <u>Classification:</u> disease state specific |
| 28 |                          |                           |                              |                        |                                     | <u>Currency Year:</u> USD, 2010               |
| 29 | <i>Zhao et al</i> [47]   | To examine the            | <u>Design:</u> Retrospective | <u>Measure:</u> PDC    | Total                               | <u>Quality:</u> medium                        |
| 30 | 2014                     | association between       | cohort study                 | <u>Classification:</u> | healthcare                          | <u>Classification:</u> cost                   |
| 31 | US                       | teriparatide adherence    | <u>Follow Up:</u> 36 months  | (≥80% = high, 50-      | costs                               | description                                   |
| 32 |                          | and healthcare            | <u>Sample Size:</u> 824      | 80% = medium,          | Inpatient costs                     | <u>Cost of Nonadherence</u> *:                |
| 33 |                          | utilisation and costs     | (≥80:362, 50-80%:219,        | <50% = low)            | Outpatient                          | Adjusted:                                     |
| 34 |                          | among hip fracture        | <50%:243)                    | <u>Method of</u>       | costs                               | THC(≥80):\$34428 (\$37553.4),                 |
| 35 |                          | patients.                 |                              | <u>Assessment:</u>     | Pharmacy                            | THC(50-80):\$37956 (\$41401.68),              |
| 36 |                          |                           |                              | pharmacy claims        | costs                               | THC(<50):\$31188 (\$34019.28),                |
| 37 |                          |                           |                              | data                   |                                     | IC(≥80):\$7548 (\$8233.20),                   |
| 38 |                          |                           |                              |                        |                                     | IC(50-80):\$11520 (\$1256.80),                |
| 39 |                          |                           |                              |                        |                                     | IC(<50):\$11556 (\$12605.04),                 |
| 40 |                          |                           |                              |                        |                                     |                                               |
| 41 |                          |                           |                              |                        |                                     |                                               |
| 42 |                          |                           |                              |                        |                                     |                                               |
| 43 |                          |                           |                              |                        |                                     |                                               |
| 44 |                          |                           |                              |                        |                                     |                                               |
| 45 |                          |                           |                              |                        |                                     |                                               |
| 46 |                          |                           |                              |                        |                                     |                                               |
| 47 |                          |                           |                              |                        |                                     |                                               |

1  
2  
3  
4  
5  
6  
7  
8  
9  
10  
11  
12  
13  
14  
15  
16  
17  
18  
19  
20  
21  
22  
23  
24  
25  
26  
27  
28  
29  
30  
31  
32  
33  
34  
35  
36  
37  
38  
39  
40  
41  
42  
43  
44  
45  
46  
47

For peer review

Zhao *et al*[48]  
2013  
US

To examine the association between teriparatide (TPTD) adherence and healthcare utilisation and costs in real world US kyphoplasty/vertebroplasty (KV) patients.

Design: Retrospective observational cohort study  
Follow Up: 36 months  
Sample Size: 1568  
(≥80: 783, 50-80%: 382, <50%: 403)

Measure: PDC  
Classification: (≥80% = high, 50-80% = medium, <50% = low)  
Method of Assessment: pharmacy claims data

Total healthcare costs  
Inpatient costs  
Outpatient costs  
Pharmacy costs

OC(≥80):\$9312 (\$10157.40),  
OC(50-80):\$12816 (\$13979.40),  
OC(<50):\$13044 (\$14228.16),  
PC(≥80):\$18864 (\$20576.52),  
PC(50-80):\$13116 (\$14306.64),  
PC(<50):\$7452 (\$8128.44)

Unadjusted:

THC(≥80):\$37464 (\$40865.04),  
THC(50-80):\$35076 (\$38260.20),  
THC(<50):\$29484 (\$32160.60),  
IC(≥80):\$7092 (\$7735.80),  
IC(50-80):\$11100 (\$12107.64),  
IC(<50):\$10632 (\$11597.16),  
OC(≥80):\$9900 (\$10798.68),  
OC(50-80):\$11352 (\$12382.56),  
OC(<50):\$11988 (\$13076.28),  
PC(≥80):\$20484 (\$22343.52),  
PC(50-80):\$12624 (\$13770),  
PC(<50):\$6864 (\$7487.16)

Type of Costs: adjusted and unadjusted  
Classification: disease state specific  
Currency Year: USD, 2010  
Cost of Nonadherence\*:

Adjusted:  
THC(≥80):\$40212 (\$43862.52),  
THC(50-80):\$40512 (\$44189.76),  
THC(<50):\$40128 (\$43770.84),  
IC(≥80):\$8136 (\$8874.60),  
IC(50-80):\$12060 (\$13154.76),  
IC(<50):\$15444 (\$43404.36),  
OC(≥80):\$12924 (\$14097.24),  
OC(50-80):\$14928 (\$16283.16),  
OC(<50):\$17568 (\$19162.80),

Quality: medium  
Classification: cost description

PC(≥80):\$19392 (\$21152.40),  
 PC(50-80):\$13908 (\$15170.52),  
 PC(<50):\$8700 (\$9843.24)  
 Unadjusted:  
 THC(≥80):\$42768 (\$46650.48),  
 THC(50-80):\$36780 (\$40118.88),  
 THC(<50):\$39792 (\$43404.36),  
 IC(≥80):\$7620 (\$8311.80),  
 IC(50-80):\$12228 (\$13338.12),  
 IC(<50):\$15768 (\$17199.48),  
 OC(≥80):\$14580 (\$15903.60),  
 OC(50-80):\$12108 (\$13207.20),  
 OC(<50):\$15324 (\$16715.16),  
 PC(≥80):\$20568 (\$22435.20),  
 PC(50-80):\$12444 (\$13573.68),  
 PC(<50):\$8700 (\$9489.84)

**Respiratory Disease**

*Davis et al*[49]  
 2017  
 US

To assess the association between adherence levels to different inhaled corticosteroid/long acting β<sub>2</sub>-adrenergic agonist and COPD exacerbation rates and costs in commercially insured population

Design: Observational cohort study  
Follow Up: 12 months  
Sample Size: 13657 (≥80%: 1898, ≥50<80%: 1971, ≥30 <50%: 2443, <30% :7345)

Measure: PDC  
Classification: (≥80 = adherent, ≥50<80% = mildly nonadherent, ≥30 <50% = moderately nonadherent, <30% highly nonadherent)  
Method of Assessment: commercially insured healthcare claims data

Total costs  
 Outpatient costs  
 Pharmacy costs  
 Hospitalization costs

Type of Costs: adjusted  
Classification: all cause and disease state specific  
Currency Year: USD, 2014  
Cost of Nonadherence\*:  
 All cause:  
 TC(≥80):\$22546 (\$22772.24),  
 TC(50-80):\$25545 (\$25800.95),  
 TC(30-50):\$24303 (\$24546.51),  
 TC(<30):\$25148 (\$25399.98),  
 OC(≥80):\$7816 (\$7894.31),  
 OC(50-80):\$8225 (\$8307.41),  
 OC(30-50):\$8365 (\$8448.81),  
 OC(<30):\$8857 (\$8945.74),  
 PC(≥80):\$7954 (\$8033.70),

Quality: medium  
Classification: cost description

1  
2  
3  
4  
5  
6  
7  
8  
9  
10  
11  
12  
13  
14  
15  
16  
17  
18  
19  
20  
21  
22  
23  
24  
25  
26  
27  
28  
29  
30  
31  
32  
33  
34  
35  
36  
37  
38  
39  
40  
41  
42  
43  
44  
45  
46  
47

For peer review

PC(50-80):\$6862 (\$6930.76),  
 PC(30-50):\$5485 (\$5539.96),  
 PC(<30):\$4395 (\$4439.04),  
 HC(≥80):\$6106 (\$6167.51),  
 HC(50-80):\$9391 (\$9485.09),  
 HC(30-50):\$9171 (\$9262.89),  
 HC(<30):\$10849 (\$10957.70)  
 Disease state specific:  
 TC(≥80):\$8075.33 (\$8156.24),  
 TC(50-80):\$7053 (\$7123.67),  
 TC(30-50):\$6623 (\$6689.36),  
 TC(<30):\$5644 (\$5700.55),  
 OC(≥80):\$2194.33 (\$2216.32),  
 OC(50-80):\$1947 (\$1966.51),  
 OC(30-50):\$1997 (\$2017.01),  
 OC(<30):\$2152 (\$2173.56),  
 PC(≥80):\$4464 (\$4508.73),  
 PC(50-80):\$3345 (\$3378.52),  
 PC(30-50):\$2307 (\$2330.12),  
 PC(<30):\$1569 (\$1584.72),  
 HC(≥80):\$1074.67 (\$1085.44),  
 HC(50-80):\$1155 (\$1166.57),  
 HC(30-50):\$1619 (\$1635.22),  
 HC(<30):\$1405 (\$1419.08)

*Delea et al*[50]  
 2008  
 US

To assess the  
 association between  
 adherence with  
 fluticasone  
 propionate/salmeterol  
 combination product in  
 a single inhaler and  
 asthma care utilisation  
 and costs in asthma

Design: Retrospective  
 longitudinal cohort  
 study  
Follow Up: 24 months  
Sample Size: 12907  
 (≥75: 2612, 50-75%:  
 3608, 25-50%: 5035,  
 <25%: 1652)

Measure: MPR  
Classification:  
 (≥75, 50-75%, 25-  
 50%, <25%)  
Method of  
Assessment:  
 pharmacy claims  
 data

Total costs  
 Outpatient  
 costs  
 ED costs  
 Other costs

Type of Costs: unadjusted  
Classification: disease state specific  
Currency Year: USD, 2003  
Cost of Nonadherence \*:  
 TC(≥75):\$1564 (\$1990.27),  
 TC(50-75):\$1128 (\$1435.44),  
 TC(25-50):\$900 (\$1145.30),  
 TC(<25):\$632 (\$804.25),  
 OC(≥75):\$1272 (\$1618.69),

Quality: medium  
Classification: cost  
 description

1  
2  
3 patients in typical US  
4 clinical practice  
5  
6  
7  
8  
9  
10  
11  
12  
13  
14  
15

OC(50-75):\$852 (\$1084.21),  
OC(25-50):\$600 (\$763.53),  
OC(<25):\$388 (\$493.75),  
EDC(≥75):\$32 (\$40.72),  
EDC(50-75):\$36 (\$45.81),  
EDC(25-50):\$60 (\$76.35),  
EDC(<25):\$48 (\$61.08),  
OtC(≥75):\$292 (\$371.59),  
OtC(50-75):\$276 (\$351.22),  
OtC(25-50):\$300 (\$381.77),  
OtC(<25):\$240 (\$305.41)

16 *Diehl et al*[51]  
17 2010  
18 US

To evaluate  
19 respiratory-related  
20 medical outcomes and  
21 cost for infants who  
22 were prescribed and  
23 received palivizumab in  
24 accordance with the  
25 dosing schedule  
26 recommended by the  
27 American Academy of  
28 Paediatrics in 2006  
29 versus those who did  
30 not.

Design: Retrospective  
claims analysis  
Follow Up: 7 months  
Sample Size: 245 (A:73,  
NA:172)

Measure: 37 day  
gap in claims  
Classification: (>37  
day gap in claims =  
noncompliant)  
Method of  
Assessment:  
pharmacy claims  
data

Total costs  
Pharmacy  
costs  
Services costs

Type of Costs: unadjusted  
Classification: disease state specific  
Currency Year: USD, 2007  
Cost of Nonadherence:  
TC:\$19093.46 (\$21656.12),  
PC:\$7647.40 (\$8673.81),  
SC<sup>\*\*</sup>:\$11604.03 (\$13161.45)

Quality: medium  
Classification: cost  
description

31 *Joshi et al*[52]  
32 2006  
33 US

34 Examine the  
35 association of  
36 medication adherence  
37 with workplace  
38 productivity and health  
39 related quality of life in  
40 asthma patients.  
41  
42  
43  
44  
45  
46  
47

Design: quantitative  
analysis  
Follow Up:  
Sample Size: 385  
(high:150, medium:73,  
low: 162)

Measure: Morisky  
scale  
Classification: (0=  
high adherence, 1-  
2 = medium  
adherence, >2 =  
low adherence)  
Method of  
Assessment:

Total  
productivity  
cost  
Absenteeism  
costs  
Presenteeism  
costs

Type of Costs: unadjusted  
Classification: disease state specific  
Currency Year: USD, 2002  
Cost of Nonadherence<sup>##</sup>:  
TPC(0):\$1210.90 (\$1571.73),  
TPC(1-2):\$1428.50 (\$1854.17),  
TPC(>2):\$1073.10 (\$1392.87),  
AbC(0):\$633.70 (\$822.53),  
AbC(1-2):\$608.90 (\$790.34),

Quality: medium  
Classification: cost  
outcome  
description

|    |                               |                                                                                                                                                                                        |                                                                                                                                            |                                                                                                                                                                               |                                                                                                                                                                                                                                   |                                                                                                                                                                                                                                                                                                                                                                                             |                                                                   |
|----|-------------------------------|----------------------------------------------------------------------------------------------------------------------------------------------------------------------------------------|--------------------------------------------------------------------------------------------------------------------------------------------|-------------------------------------------------------------------------------------------------------------------------------------------------------------------------------|-----------------------------------------------------------------------------------------------------------------------------------------------------------------------------------------------------------------------------------|---------------------------------------------------------------------------------------------------------------------------------------------------------------------------------------------------------------------------------------------------------------------------------------------------------------------------------------------------------------------------------------------|-------------------------------------------------------------------|
| 1  |                               |                                                                                                                                                                                        |                                                                                                                                            |                                                                                                                                                                               |                                                                                                                                                                                                                                   |                                                                                                                                                                                                                                                                                                                                                                                             |                                                                   |
| 2  |                               |                                                                                                                                                                                        |                                                                                                                                            |                                                                                                                                                                               |                                                                                                                                                                                                                                   |                                                                                                                                                                                                                                                                                                                                                                                             |                                                                   |
| 3  |                               |                                                                                                                                                                                        |                                                                                                                                            |                                                                                                                                                                               |                                                                                                                                                                                                                                   |                                                                                                                                                                                                                                                                                                                                                                                             |                                                                   |
| 4  |                               |                                                                                                                                                                                        | questionnaire                                                                                                                              |                                                                                                                                                                               | AbC(>2):\$474.80 (\$616.28),                                                                                                                                                                                                      |                                                                                                                                                                                                                                                                                                                                                                                             |                                                                   |
| 5  |                               |                                                                                                                                                                                        |                                                                                                                                            |                                                                                                                                                                               | PrC(0):\$577.20 (\$749.20),                                                                                                                                                                                                       |                                                                                                                                                                                                                                                                                                                                                                                             |                                                                   |
| 6  |                               |                                                                                                                                                                                        |                                                                                                                                            |                                                                                                                                                                               | PrC(1-2):\$819.60 (\$1063.83),                                                                                                                                                                                                    |                                                                                                                                                                                                                                                                                                                                                                                             |                                                                   |
| 7  |                               |                                                                                                                                                                                        |                                                                                                                                            |                                                                                                                                                                               | PrC(>2):\$598.30 (\$776.59)                                                                                                                                                                                                       |                                                                                                                                                                                                                                                                                                                                                                                             |                                                                   |
| 8  | <i>Miravittles et al</i> [53] | To analyse the economic impact of non-adherence to the global initiative for obstructive lung disease (GOLD) guidelines in patients with chronic obstructive pulmonary disease (COPD). | <u>Design:</u> multicentre, retrospective, observational study<br><u>Follow Up:</u> 18 months<br><u>Sample Size:</u> 1365 (A:246, NA:1119) | <u>Measure:</u> GOLD 2007 Guidelines<br><u>Classification:</u> (adherent, nonadherent)<br><u>Method of Assessment:</u> GOLD guidelines                                        | ED costs<br>Pharmacy costs<br>Physician office visit costs<br>Hospitalization costs<br>Primary care costs<br>Interdisciplinary visit costs<br>Medical test costs<br>Radiology costs<br>Laboratory costs<br>Total healthcare costs | <u>Type of Costs:</u> unadjusted<br><u>Classification:</u> disease state specific<br><u>Currency Year:</u> EUR, 2009<br><u>Cost of Nonadherence:</u><br>EDC:€40.83 (\$57.91),<br>PC:€771.50 (\$1094.27),<br>POC:€106.29 (\$150.76),<br>HC:€101.61 (\$144.12)<br>PCC:€123.84 (\$175.65),<br>IntC:€321.44 (\$455.92),<br>MTC:€36.66 (\$51.99),<br>RC:€24.24 (\$34.38),<br>LC:€17.35 (\$24.61) | <u>Quality:</u> medium<br><u>Classification:</u> cost description |
| 9  | 2013                          |                                                                                                                                                                                        |                                                                                                                                            |                                                                                                                                                                               |                                                                                                                                                                                                                                   |                                                                                                                                                                                                                                                                                                                                                                                             |                                                                   |
| 10 | Spain                         |                                                                                                                                                                                        |                                                                                                                                            |                                                                                                                                                                               |                                                                                                                                                                                                                                   |                                                                                                                                                                                                                                                                                                                                                                                             |                                                                   |
| 11 |                               |                                                                                                                                                                                        |                                                                                                                                            |                                                                                                                                                                               |                                                                                                                                                                                                                                   |                                                                                                                                                                                                                                                                                                                                                                                             |                                                                   |
| 12 |                               |                                                                                                                                                                                        |                                                                                                                                            |                                                                                                                                                                               |                                                                                                                                                                                                                                   |                                                                                                                                                                                                                                                                                                                                                                                             |                                                                   |
| 13 |                               |                                                                                                                                                                                        |                                                                                                                                            |                                                                                                                                                                               |                                                                                                                                                                                                                                   |                                                                                                                                                                                                                                                                                                                                                                                             |                                                                   |
| 14 |                               |                                                                                                                                                                                        |                                                                                                                                            |                                                                                                                                                                               |                                                                                                                                                                                                                                   |                                                                                                                                                                                                                                                                                                                                                                                             |                                                                   |
| 15 |                               |                                                                                                                                                                                        |                                                                                                                                            |                                                                                                                                                                               |                                                                                                                                                                                                                                   |                                                                                                                                                                                                                                                                                                                                                                                             |                                                                   |
| 16 |                               |                                                                                                                                                                                        |                                                                                                                                            |                                                                                                                                                                               |                                                                                                                                                                                                                                   |                                                                                                                                                                                                                                                                                                                                                                                             |                                                                   |
| 17 |                               |                                                                                                                                                                                        |                                                                                                                                            |                                                                                                                                                                               |                                                                                                                                                                                                                                   |                                                                                                                                                                                                                                                                                                                                                                                             |                                                                   |
| 18 |                               |                                                                                                                                                                                        |                                                                                                                                            |                                                                                                                                                                               |                                                                                                                                                                                                                                   |                                                                                                                                                                                                                                                                                                                                                                                             |                                                                   |
| 19 |                               |                                                                                                                                                                                        |                                                                                                                                            |                                                                                                                                                                               |                                                                                                                                                                                                                                   |                                                                                                                                                                                                                                                                                                                                                                                             |                                                                   |
| 20 |                               |                                                                                                                                                                                        |                                                                                                                                            |                                                                                                                                                                               |                                                                                                                                                                                                                                   |                                                                                                                                                                                                                                                                                                                                                                                             |                                                                   |
| 21 |                               |                                                                                                                                                                                        |                                                                                                                                            |                                                                                                                                                                               |                                                                                                                                                                                                                                   |                                                                                                                                                                                                                                                                                                                                                                                             |                                                                   |
| 22 |                               |                                                                                                                                                                                        |                                                                                                                                            |                                                                                                                                                                               |                                                                                                                                                                                                                                   |                                                                                                                                                                                                                                                                                                                                                                                             |                                                                   |
| 23 |                               |                                                                                                                                                                                        |                                                                                                                                            |                                                                                                                                                                               |                                                                                                                                                                                                                                   |                                                                                                                                                                                                                                                                                                                                                                                             |                                                                   |
| 24 |                               |                                                                                                                                                                                        |                                                                                                                                            |                                                                                                                                                                               |                                                                                                                                                                                                                                   |                                                                                                                                                                                                                                                                                                                                                                                             |                                                                   |
| 25 |                               |                                                                                                                                                                                        |                                                                                                                                            |                                                                                                                                                                               |                                                                                                                                                                                                                                   |                                                                                                                                                                                                                                                                                                                                                                                             |                                                                   |
| 26 |                               |                                                                                                                                                                                        |                                                                                                                                            |                                                                                                                                                                               |                                                                                                                                                                                                                                   |                                                                                                                                                                                                                                                                                                                                                                                             |                                                                   |
| 27 |                               |                                                                                                                                                                                        |                                                                                                                                            |                                                                                                                                                                               |                                                                                                                                                                                                                                   |                                                                                                                                                                                                                                                                                                                                                                                             |                                                                   |
| 28 | <i>Quittner et al</i> [54]    | To evaluate associations of adherence to pulmonary medications, age, healthcare use and cost among cystic fibrosis patients.                                                           | <u>Design:</u> retrospective, cohort study<br><u>Follow Up:</u> 2 years<br><u>Sample Size:</u> 3287 (>80%: 663, 50-80%: 949, <50%: 1675)   | <u>Measure:</u> MPR<br><u>Classification:</u> (≥80% = high adherence, 50-80% = moderate adherence, <50% = low adherence)<br><u>Method of Assessment:</u> pharmacy claims data | Total healthcare costs                                                                                                                                                                                                            | <u>Type of Costs:</u> unadjusted<br><u>Classification:</u> all cause and disease state specific<br><u>Currency Year:</u> USD, 2011<br><u>Cost of Nonadherence*:</u><br>All cause:<br>THC(≥80):\$35749.50 (\$38244.05),<br>THC(50-80):\$45031.50 (\$48173.73),<br>THC(<50):\$50284.50 (\$53793.28)<br>Disease state specific:<br>THC(≥80):\$23764 (\$25422.22),                              | <u>Quality:</u> medium<br><u>Classification:</u> cost description |
| 29 | 2014                          |                                                                                                                                                                                        |                                                                                                                                            |                                                                                                                                                                               |                                                                                                                                                                                                                                   |                                                                                                                                                                                                                                                                                                                                                                                             |                                                                   |
| 30 | US                            |                                                                                                                                                                                        |                                                                                                                                            |                                                                                                                                                                               |                                                                                                                                                                                                                                   |                                                                                                                                                                                                                                                                                                                                                                                             |                                                                   |
| 31 |                               |                                                                                                                                                                                        |                                                                                                                                            |                                                                                                                                                                               |                                                                                                                                                                                                                                   |                                                                                                                                                                                                                                                                                                                                                                                             |                                                                   |
| 32 |                               |                                                                                                                                                                                        |                                                                                                                                            |                                                                                                                                                                               |                                                                                                                                                                                                                                   |                                                                                                                                                                                                                                                                                                                                                                                             |                                                                   |
| 33 |                               |                                                                                                                                                                                        |                                                                                                                                            |                                                                                                                                                                               |                                                                                                                                                                                                                                   |                                                                                                                                                                                                                                                                                                                                                                                             |                                                                   |
| 34 |                               |                                                                                                                                                                                        |                                                                                                                                            |                                                                                                                                                                               |                                                                                                                                                                                                                                   |                                                                                                                                                                                                                                                                                                                                                                                             |                                                                   |
| 35 |                               |                                                                                                                                                                                        |                                                                                                                                            |                                                                                                                                                                               |                                                                                                                                                                                                                                   |                                                                                                                                                                                                                                                                                                                                                                                             |                                                                   |
| 36 |                               |                                                                                                                                                                                        |                                                                                                                                            |                                                                                                                                                                               |                                                                                                                                                                                                                                   |                                                                                                                                                                                                                                                                                                                                                                                             |                                                                   |
| 37 |                               |                                                                                                                                                                                        |                                                                                                                                            |                                                                                                                                                                               |                                                                                                                                                                                                                                   |                                                                                                                                                                                                                                                                                                                                                                                             |                                                                   |
| 38 |                               |                                                                                                                                                                                        |                                                                                                                                            |                                                                                                                                                                               |                                                                                                                                                                                                                                   |                                                                                                                                                                                                                                                                                                                                                                                             |                                                                   |
| 39 |                               |                                                                                                                                                                                        |                                                                                                                                            |                                                                                                                                                                               |                                                                                                                                                                                                                                   |                                                                                                                                                                                                                                                                                                                                                                                             |                                                                   |
| 40 |                               |                                                                                                                                                                                        |                                                                                                                                            |                                                                                                                                                                               |                                                                                                                                                                                                                                   |                                                                                                                                                                                                                                                                                                                                                                                             |                                                                   |
| 41 |                               |                                                                                                                                                                                        |                                                                                                                                            |                                                                                                                                                                               |                                                                                                                                                                                                                                   |                                                                                                                                                                                                                                                                                                                                                                                             |                                                                   |
| 42 |                               |                                                                                                                                                                                        |                                                                                                                                            |                                                                                                                                                                               |                                                                                                                                                                                                                                   |                                                                                                                                                                                                                                                                                                                                                                                             |                                                                   |
| 43 |                               |                                                                                                                                                                                        |                                                                                                                                            |                                                                                                                                                                               |                                                                                                                                                                                                                                   |                                                                                                                                                                                                                                                                                                                                                                                             |                                                                   |
| 44 |                               |                                                                                                                                                                                        |                                                                                                                                            |                                                                                                                                                                               |                                                                                                                                                                                                                                   |                                                                                                                                                                                                                                                                                                                                                                                             |                                                                   |
| 45 |                               |                                                                                                                                                                                        |                                                                                                                                            |                                                                                                                                                                               |                                                                                                                                                                                                                                   |                                                                                                                                                                                                                                                                                                                                                                                             |                                                                   |
| 46 |                               |                                                                                                                                                                                        |                                                                                                                                            |                                                                                                                                                                               |                                                                                                                                                                                                                                   |                                                                                                                                                                                                                                                                                                                                                                                             |                                                                   |
| 47 |                               |                                                                                                                                                                                        |                                                                                                                                            |                                                                                                                                                                               |                                                                                                                                                                                                                                   |                                                                                                                                                                                                                                                                                                                                                                                             |                                                                   |

1  
2  
3  
4  
5  
6 **Gastrointestinal**  
7 **Disease**

|                                                   |                                                                                                                                                                                                                             |                                                                                                                                              |                                                                                                                                                                                            |                                                                                          |                                                                                                                                                                                                                                                                       |                                                                           |
|---------------------------------------------------|-----------------------------------------------------------------------------------------------------------------------------------------------------------------------------------------------------------------------------|----------------------------------------------------------------------------------------------------------------------------------------------|--------------------------------------------------------------------------------------------------------------------------------------------------------------------------------------------|------------------------------------------------------------------------------------------|-----------------------------------------------------------------------------------------------------------------------------------------------------------------------------------------------------------------------------------------------------------------------|---------------------------------------------------------------------------|
| 8 <i>Carter et al</i> [55]<br>9 2011<br>10 US     | To further evaluate the impact of adherence to infliximab on CD related utilisation and inpatient costs in the first year of treatment using a different definition of adherence and a larger more diverse claims database. | <u>Design:</u> retrospective, observational cohort claims analysis<br><u>Follow Up:</u> 12 months<br><u>Sample Size:</u> 638 (A:466, NA:172) | <u>Measure:</u> number of infusions in 12 month period<br><u>Classification:</u> (7-9 infusions = adherent, <7 infusions = nonadherent)<br><u>Method of Assessment:</u> health claims data | Hospitalization costs                                                                    | THC(50-80):\$33132.50 (\$35444.44),<br>THC(<50):\$33894 (\$36259.07)<br><br><u>Type of Costs:</u> unadjusted<br><u>Classification:</u> disease state specific<br><u>Currency Year:</u> USD, 2007<br><u>Cost of Nonadherence:</u> HC:\$37783 (\$42854.12)              | <u>Quality:</u> medium<br><u>Classification:</u> cost outcome description |
| 21 <i>Gosselin et al</i> [56]<br>22 2009<br>23 US | To examine the effects of gastroesophageal reflux disease (GERD) patients compliance with PPI therapy on health care resource utilisation and costs.                                                                        | <u>Design:</u> retrospective cohort study<br><u>Follow Up:</u><br><u>Sample Size:</u> 41837 (A:28321, NA:13516)                              | <u>Measure:</u> MPR<br><u>Classification:</u> (≥80% = adherent, <80% = nonadherent)<br><u>Method of Assessment:</u> pharmacy claims data                                                   | Total costs<br>Inpatient costs<br>Outpatient costs<br>Pharmacy costs<br>Medical costs    | <u>Type of Costs:</u> adjusted<br><u>Classification:</u> disease state specific<br><u>Currency Year:</u> USD, 2003<br><u>Cost of Nonadherence:</u> TC:\$9497 (\$12085.43), IC:\$2116 (\$2692.72), OC:\$5458 (\$6945.59), PC:\$1922 (\$2445.85), MC:\$7575 (\$9639.58) | <u>Quality:</u> medium<br><u>Classification:</u> cost description         |
| 31 <i>Kane et al</i> [57]<br>32 2009<br>33 US     | To evaluate adherence to infliximab maintenance therapy and the impact of medication adherence on healthcare utilisation and costs by patients.                                                                             | <u>Design:</u> retrospective cohort analysis<br><u>Follow Up:</u> 12 months<br><u>Sample Size:</u> 571 (A:375, NA:196)                       | <u>Measure:</u> number of infusions in 12 month period<br><u>Classification:</u> (≥8 infusions = adherent, <7 infusions = nonadherent)<br><u>Method of</u>                                 | Outpatient costs<br>ED costs<br>Pharmacy costs<br>Medical costs<br>Hospitalization costs | <u>Type of Costs:</u> unadjusted<br><u>Classification:</u> all cause and disease state specific<br><u>Currency Year:</u> USD, 2004<br><u>Cost of Nonadherence:</u> All cause: OC:\$6679 (\$8272.62), EDC:\$314 (\$388.92), MC:\$16129 (\$19977.40),                   | <u>Quality:</u> medium<br><u>Classification:</u> cost outcome description |

|    |                         |                       |                               |                        |                          |                                              |
|----|-------------------------|-----------------------|-------------------------------|------------------------|--------------------------|----------------------------------------------|
| 1  |                         |                       |                               |                        |                          |                                              |
| 2  |                         |                       |                               |                        |                          |                                              |
| 3  |                         |                       |                               |                        |                          |                                              |
| 4  |                         |                       | <u>Assessment:</u>            |                        | HC:\$6893 (\$8537.68)    |                                              |
| 5  |                         |                       | health claims data            |                        | Disease state specific:  |                                              |
| 6  |                         |                       |                               |                        | OC:\$3931 (\$4868.94),   |                                              |
| 7  |                         |                       |                               |                        | EDC:\$91 (\$112.71),     |                                              |
| 8  |                         |                       |                               |                        | PC:\$18751 (\$23225.01), |                                              |
| 9  |                         |                       |                               |                        | MC:\$10243 (\$12686.99), |                                              |
| 10 |                         |                       |                               |                        | HC:\$4494 (\$5566.27)    |                                              |
| 11 | <i>Mitra et al</i> [58] | To assess the         | <u>Design:</u> retrospective, | <u>Measure:</u> MPR    | Inpatient costs          | <u>Type of Costs:</u> adjusted               |
| 12 | 2012                    | association between   | observational cohort          | <u>Classification:</u> | Outpatient               | <u>Classification:</u> all cause and disease |
| 13 | US                      | adherence to oral 5-  | study                         | (≥80% = adherent,      | costs                    | state specific                               |
| 14 |                         | aminosalicylates (5-  | <u>Follow Up:</u> 12 months   | <80% =                 | ED costs                 | <u>Currency Year:</u> USD, 2010              |
| 15 |                         | ASAs) and all cause   | <u>Sample Size:</u> 1693      | nonadherent)           | Pharmacy                 | <u>Cost of Nonadherence:</u>                 |
| 16 |                         | costs and health care | (A:476, NA:1216)              | <u>Method of</u>       | costs                    | All cause:                                   |
| 17 |                         | utilisation among     |                               | <u>Assessment:</u>     | Ancillary costs          | PC:\$1541.60 (\$1681.55)                     |
| 18 |                         | patients with active  |                               | pharmacy claims        | Non-pharmacy             | Disease state specific:                      |
| 19 |                         | ulcerative colitis.   |                               | data                   | costs                    | IC:\$28726.65 (\$31334.47),                  |
| 20 |                         |                       |                               |                        |                          | OC:\$1145.67 (\$1249.67),                    |
| 21 |                         |                       |                               |                        |                          | EDC:\$635.95 (\$693.68),                     |
| 22 |                         |                       |                               |                        |                          | AC:\$4923.29 (\$5370.23),                    |
| 23 |                         |                       |                               |                        |                          | NPC:\$14226.32 (\$15517.79)                  |
| 24 |                         |                       |                               |                        |                          |                                              |
| 25 |                         |                       |                               |                        |                          |                                              |
| 26 | <i>Wan et al</i> [59]   | To examine the effect | <u>Design:</u> retrospective  | <u>Measure:</u> MPR    | Total costs              | <u>Type of Costs:</u> adjusted               |
| 27 | 2014                    | of adherence versus   | cohort analysis               | <u>Classification:</u> | Total                    | <u>Classification:</u> all cause and disease |
| 28 | US                      | non-adherence on      | <u>Follow Up:</u> 360 days    | (≥80% = adherent,      | healthcare               | state specific                               |
| 29 |                         | healthcare costs in   | <u>Sample Size:</u> 1646      | <80% =                 | costs                    | <u>Currency Year:</u> USD, 2009              |
| 30 |                         | patients with         | (A:674, NA:972)               | nonadherent)           | Inpatient costs          | <u>Cost of Nonadherence:</u>                 |
| 31 |                         | inflammatory bowel    |                               | <u>Method of</u>       | Outpatient               | All cause:                                   |
| 32 |                         | disease.              |                               | <u>Assessment:</u>     | costs                    | TC:\$47411 (\$52341.27),                     |
| 33 |                         |                       |                               | pharmacy claims        | ED costs                 | THC:\$32522 (\$35903.96),                    |
| 34 |                         |                       |                               | data                   | Pharmacy                 | IC:\$17634 (\$19467.76),                     |
| 35 |                         |                       |                               |                        | costs                    | OC:\$10909 (\$12043.43),                     |
| 36 |                         |                       |                               |                        |                          | EDC:\$458 (\$505.63),                        |
| 37 |                         |                       |                               |                        |                          | PC:\$18410 (\$20324.46)                      |
| 38 |                         |                       |                               |                        |                          | Disease state specific:                      |
| 39 |                         |                       |                               |                        |                          |                                              |
| 40 |                         |                       |                               |                        |                          |                                              |
| 41 |                         |                       |                               |                        |                          |                                              |
| 42 |                         |                       |                               |                        |                          |                                              |
| 43 |                         |                       |                               |                        |                          |                                              |
| 44 |                         |                       |                               |                        |                          |                                              |
| 45 |                         |                       |                               |                        |                          |                                              |
| 46 |                         |                       |                               |                        |                          |                                              |
| 47 |                         |                       |                               |                        |                          |                                              |



|    |                            |                         |                              |                        |                           |                                               |
|----|----------------------------|-------------------------|------------------------------|------------------------|---------------------------|-----------------------------------------------|
| 1  |                            |                         |                              |                        |                           |                                               |
| 2  |                            |                         |                              |                        |                           |                                               |
| 3  |                            |                         |                              |                        |                           |                                               |
| 4  |                            |                         |                              |                        | TC:\$33652 (\$37151.47),  |                                               |
| 5  |                            |                         |                              |                        | THC:\$18764 (\$20715.27), |                                               |
| 6  |                            |                         |                              |                        | IC:\$12564 (\$13870.53),  |                                               |
| 7  |                            |                         |                              |                        | OC:\$5890 (\$6502.50),    |                                               |
| 8  |                            |                         |                              |                        | EDC:\$48 (\$52.99),       |                                               |
| 9  |                            |                         |                              |                        | PC:\$15150 (\$16725.45)   |                                               |
| 10 | <b>Epilepsy</b>            |                         |                              |                        |                           |                                               |
| 11 | <i>Davis et al</i> [60]    | To assess the extent of | <u>Design:</u> retrospective | <u>Measure:</u> MPR    | Total costs               | <u>Type of Costs:</u> unadjusted              |
| 12 | 2008                       | refill non-adherence    | claims analysis              | <u>Classification:</u> | Inpatient costs           | <u>Classification:</u> disease state specific |
| 13 | US                         | with antiepileptic      | <u>Follow Up:</u> 12 months  | (≥80% = adherent,      | ED costs                  | <u>Currency Year:</u> USD, 2003               |
| 14 |                            | drugs (AEDs) and the    | <u>Sample Size:</u> 10892    | <80% =                 | Pharmacy                  | <u>Cost of Nonadherence</u> <sup>###</sup> :  |
| 15 |                            | potential association   | (A:6644, NA:4248)            | nonadherent)           | costs                     | TC:\$1466 (\$1865.56),                        |
| 16 |                            | between AED non-        |                              | <u>Method of</u>       | Other                     | IC:\$1799 (\$2289.32),                        |
| 17 |                            | adherence and           |                              | <u>Assessment:</u>     | pharmacy                  | EDC:\$260 (\$330.86),                         |
| 18 |                            | healthcare costs in an  |                              | pharmacy claims        | costs                     | PC:-\$71 (-\$90.35),                          |
| 19 |                            | adult managed care      |                              | data                   |                           | OtPC:-\$358 (-\$455.57)                       |
| 20 |                            | population.             |                              |                        |                           |                                               |
| 21 |                            |                         |                              |                        |                           |                                               |
| 22 |                            |                         |                              |                        |                           |                                               |
| 23 | <i>Ettinger et al</i> [61] | To assess the extent to | <u>Design:</u> retrospective | <u>Measure:</u> MPR    | Total costs               | <u>Type of Costs:</u> unadjusted              |
| 24 | 2009                       | which elderly patients  | claims analysis              | <u>Classification:</u> | Inpatient costs           | <u>Classification:</u> disease state specific |
| 25 | US                         | diagnosed with          | <u>Follow Up:</u> 12 months  | (≥80% = adherent,      | ED costs                  | <u>Currency Year:</u> USD, 2003               |
| 26 |                            | epilepsy are non-       | <u>Sample Size:</u> 1278     | <80% =                 | Pharmacy                  | <u>Cost of Nonadherence:</u>                  |
| 27 |                            | adherent to             | (A:758, NA:520)              | nonadherent)           | costs                     | TC:\$17817 (\$22673.06),                      |
| 28 |                            | antiepileptic drugs     |                              | <u>Method of</u>       | Physician                 | IC:\$2714 (\$3453.71),                        |
| 29 |                            | (AEDs) and the          |                              | <u>Assessment:</u>     | Office visit              | EDC:\$526 (\$669.36),                         |
| 30 |                            | potential association   |                              | pharmacy claims        | costs                     | PC:\$347 (\$441.58),                          |
| 31 |                            | between AED non-        |                              | data                   | Ancillary costs           | POC:\$3063 (\$3897.83),                       |
| 32 |                            | adherence and seizure   |                              |                        | Other                     | AC:\$8344 (\$10618.18),                       |
| 33 |                            | recurrence, resource    |                              |                        | pharmacy                  | OtPC:\$2822 (\$3591.14)                       |
| 34 |                            | utilisation and annual  |                              |                        | costs                     |                                               |
| 35 |                            | direct medical costs.   |                              |                        |                           |                                               |
| 36 |                            |                         |                              |                        |                           |                                               |
| 37 |                            |                         |                              |                        |                           |                                               |
| 38 | <i>Faught et al</i> [62]   | To study the impact of  | <u>Design:</u> retrospective | <u>Measure:</u> MPR    | Total costs               | <u>Type of Costs:</u> unadjusted              |
| 39 | 2009                       | non-adherence to        | observational open           | <u>Classification:</u> | Inpatient costs           | <u>Classification:</u> disease state specific |
| 40 | US                         | antiepileptic drugs     | cohort design                | (≥80% = adherent,      | Outpatient                | <u>Currency Year:</u> USD, 2002               |
| 41 |                            |                         |                              |                        |                           | <u>Quality:</u> medium                        |
| 42 |                            |                         |                              |                        |                           | <u>Classification:</u> cost                   |
| 43 |                            |                         |                              |                        |                           | description                                   |
| 44 |                            |                         |                              |                        |                           |                                               |
| 45 |                            |                         |                              |                        |                           |                                               |
| 46 |                            |                         |                              |                        |                           |                                               |
| 47 |                            |                         |                              |                        |                           |                                               |

|    |                           |                        |                              |                        |                 |                                                |
|----|---------------------------|------------------------|------------------------------|------------------------|-----------------|------------------------------------------------|
| 1  |                           |                        |                              |                        |                 |                                                |
| 2  |                           |                        |                              |                        |                 |                                                |
| 3  |                           | (AEDs) on healthcare   | <u>Follow Up:</u> 4.65 years | <80% =                 | costs           | <u>Cost of Nonadherence</u> * :                |
| 4  |                           | utilisation and direct | <u>Sample Size:</u> 33658    | nonadherent)           | ED costs        | TC:\$14417.64 (\$18713.91),                    |
| 5  |                           | medical costs in a     | (A:24907, NA:8751)           | <u>Method of</u>       | Pharmacy        | IC:\$6682.28 (\$6873.51),                      |
| 6  |                           | Medicaid population.   |                              | <u>Assessment:</u>     | costs           | OC:\$2172.40 (\$2819.75),                      |
| 7  |                           |                        |                              | pharmacy claims        | Other           | EDC:\$405.96 (\$526.93),                       |
| 8  |                           |                        |                              | data                   | pharmacy        | PC:\$822.40 (\$1067.46),                       |
| 9  |                           |                        |                              |                        | costs           | OtPC:\$4334.60 (\$5626.26)                     |
| 10 |                           |                        |                              |                        |                 |                                                |
| 11 | <b>HIV/AIDS</b>           |                        |                              |                        |                 |                                                |
| 12 | <i>Barnett et al</i> [63] | To characterise the    | <u>Design:</u> retrospective | <u>Measure:</u>        | Total costs     | <u>Type of Costs:</u> unadjusted               |
| 13 | 2011                      | cost of HIV care       | observational cohort         | antiretroviral         |                 | <u>Classification:</u> disease state specific; |
| 14 | US                        | including combination  | study                        | taking behaviour       |                 | viral load count                               |
| 15 |                           | antiretroviral         | <u>Follow Up:</u> 1 year     | <u>Classification:</u> |                 | <u>Currency Year:</u> USD, 2006                |
| 16 |                           | treatment.             | <u>Sample Size:</u> 1896     | (85% adherence         |                 | <u>Cost of Nonadherence</u> ** :               |
| 17 |                           |                        | (not specified)              | with 3                 |                 | High viral load:                               |
| 18 |                           |                        |                              | antiretroviral         |                 | TC:\$25824 (\$30067.54)                        |
| 19 |                           |                        |                              | therapy regimen =      |                 | Low viral load:                                |
| 20 |                           |                        |                              | adherent, all other    |                 | TC:\$20509.67 (\$23879.92)                     |
| 21 |                           |                        |                              | use =                  |                 |                                                |
| 22 |                           |                        |                              | nonadherent)           |                 |                                                |
| 23 |                           |                        |                              | <u>Method of</u>       |                 |                                                |
| 24 |                           |                        |                              | <u>Assessment:</u>     |                 |                                                |
| 25 |                           |                        |                              | pharmacy claims        |                 |                                                |
| 26 |                           |                        |                              | data                   |                 |                                                |
| 27 |                           |                        |                              |                        |                 |                                                |
| 28 |                           |                        |                              |                        |                 |                                                |
| 29 |                           |                        |                              |                        |                 |                                                |
| 30 | <i>Cooke et al</i> [64]   | To measure adherence   | <u>Design:</u> retrospective | <u>Measure:</u> MPR    | Total           | <u>Type of Costs:</u> unadjusted               |
| 31 | 2014                      | to antiretroviral      | claims analysis              | <u>Classification:</u> | healthcare      | <u>Classification:</u> disease state specific  |
| 32 | US                        | therapy regimens in    | <u>Follow Up:</u> 1 year     | (≥90% = adherent,      | costs           | <u>Currency Year:</u> USD, 2011                |
| 33 |                           | commercially insured   | <u>Sample Size:</u> 3528     | <90% =                 | Inpatient costs | <u>Cost of Nonadherence:</u>                   |
| 34 |                           | patients with HIV      | (A:1737, NA:640)             | nonadherent)           | Outpatient      | THC:\$18868 (\$20184.58),                      |
| 35 |                           | infection and analyse  |                              | <u>Method of</u>       | costs           | IC:\$2700 (\$2888.40),                         |
| 36 |                           | the clinical and       |                              | <u>Assessment:</u>     | Pharmacy        | OC:\$915 (\$978.85),                           |
| 37 |                           | demographic factors    |                              | pharmacy claims        | costs           | PC:\$15253 (\$16317.33)                        |
| 38 |                           | associated with ≥90%   |                              | data                   |                 |                                                |
| 39 |                           | adherence.             |                              |                        |                 |                                                |
| 40 |                           |                        |                              |                        |                 |                                                |
| 41 |                           |                        |                              |                        |                 |                                                |
| 42 |                           |                        |                              |                        |                 |                                                |
| 43 |                           |                        |                              |                        |                 |                                                |
| 44 |                           |                        |                              |                        |                 |                                                |
| 45 |                           |                        |                              |                        |                 |                                                |
| 46 |                           |                        |                              |                        |                 |                                                |
| 47 |                           |                        |                              |                        |                 |                                                |

|                                                                                                                               |                                                                     |                                                                                                                                                                                                                   |                                                                                                                                       |                                                                                                                                          |                                                                                                                                    |                                                                                                                                                                                                                                                                                                                                                                                                                                                                                                        |                                                                           |
|-------------------------------------------------------------------------------------------------------------------------------|---------------------------------------------------------------------|-------------------------------------------------------------------------------------------------------------------------------------------------------------------------------------------------------------------|---------------------------------------------------------------------------------------------------------------------------------------|------------------------------------------------------------------------------------------------------------------------------------------|------------------------------------------------------------------------------------------------------------------------------------|--------------------------------------------------------------------------------------------------------------------------------------------------------------------------------------------------------------------------------------------------------------------------------------------------------------------------------------------------------------------------------------------------------------------------------------------------------------------------------------------------------|---------------------------------------------------------------------------|
| 1<br>2<br>3<br>4<br>5<br>6<br>7<br>8<br>9<br>10<br>11<br>12<br>13<br>14<br>15<br>16<br>17<br>18<br>19<br>20<br>21<br>22<br>23 | <i>Pruitt et al</i> [65]<br>2015<br>US                              | To examine Medicaid insured HIV positive and AIDS diagnosed patient groups separately to determine association of ART adherence to mean monthly total healthcare expenditures in the 24 month measurement period. | <u>Design:</u> retrospective cohort study<br><u>Follow Up:</u> 2 years<br><u>Sample Size:</u> 502 (A:56, NA:176)                      | <u>Measure:</u> MPR<br><u>Classification:</u> (≥90% = adherent, <90% = nonadherent)<br><u>Method of Assessment:</u> pharmacy claims data | Total costs<br>Inpatient costs<br>Outpatient costs<br>Pharmacy costs<br>Other pharmacy costs<br>Behavioural health inpatient costs | <u>Type of Costs:</u> unadjusted<br><u>Classification:</u> disease state specific<br><u>Currency Year:</u> USD, 2009<br><u>Cost of Nonadherence*:</u><br>HIV:<br>TC:\$15360 (\$16957.32),<br>IC:\$3864 (\$4265.76),<br>OC:\$3948 (\$4358.52),<br>PC:\$4956 (\$5471.40),<br>OtPC:\$1764 (\$1947.48),<br>BHIC:\$840 (\$927.36)<br>AIDS:<br>TC:\$27648 (\$30523.08),<br>IC:\$13008 (\$14360.76),<br>OC:\$5880 (\$6491.52),<br>PC:\$5640 (\$6226.56),<br>OtPC:\$2580 (\$2848.32),<br>BHIC:\$528 (\$582.96) | <u>Quality:</u> medium<br><u>Classification:</u> cost description         |
| 24<br>25<br>26<br>27<br>28<br>29<br>30<br>31<br>32<br>33<br>34<br>35<br>36<br>37                                              | <b>Parkinson's Disease</b><br><i>Davis et al</i> [66]<br>2010<br>US | To assess the extent to which patients diagnosed with Parkinson's disease are non-adherent with antiparkinson therapy and the potential association between non-adherence and all cause medical costs.            | <u>Design:</u> retrospective administrative claims study<br><u>Follow Up:</u> 12 months<br><u>Sample Size:</u> 3119 (A:1211, NA:1908) | <u>Measure:</u> MPR<br><u>Classification:</u> (≥80% = adherent, <80% = nonadherent)<br><u>Method of Assessment:</u> pharmacy claims data | Total costs<br>Pharmacy costs<br>Medical costs                                                                                     | <u>Type of Costs:</u> unadjusted<br><u>Classification:</u> disease state specific<br><u>Currency Year:</u> USD, 2001<br><u>Cost of Nonadherence:</u><br>TC:\$18511 (\$24262.36),<br>PC:\$2684 (\$3537.36),<br>MC:\$15827 (\$20859.12)                                                                                                                                                                                                                                                                  | <u>Quality:</u> medium<br><u>Classification:</u> cost outcome description |
| 38<br>39<br>40<br>41<br>42<br>43<br>44<br>45<br>46<br>47                                                                      | <i>Delea et al</i> [67]<br>2011<br>US                               | To assess the associations between adherence to                                                                                                                                                                   | <u>Design:</u> retrospective historical cohort study<br><u>Follow Up:</u> 12 months                                                   | <u>Measure:</u> PDC<br><u>Classification:</u> (≥80% =                                                                                    | Total costs<br>Inpatient costs<br>Pharmacy                                                                                         | <u>Type of Costs:</u> adjusted and unadjusted<br><u>Classification:</u> all cause and disease state specific                                                                                                                                                                                                                                                                                                                                                                                           | <u>Quality:</u> high<br><u>Classification:</u> cost description           |

1  
2  
3  
4  
5  
6  
7  
8  
9  
10  
11  
12  
13  
14  
15  
16  
17  
18  
19  
20  
21  
22  
23  
24  
25  
26  
27  
28  
29  
30  
31  
32  
33  
34  
35  
36  
37  
38  
39  
40  
41  
42  
43  
44  
45  
46  
47

levodopa/carbidopa/e  
ntacapone therapy and  
healthcare utilisation  
and costs.

Sample Size: 1215  
(A:617, NA:598)

satisfactory, <80%  
= unsatisfactory)  
Method of  
Assessment:  
pharmacy claims  
data

costs  
Other costs

Currency Year: USD, 2005

Cost of Nonadherence:

Adjusted all cause:

TC:\$19686 (\$23625.30),

IC:\$5954 (\$7145.43),

PC:\$6391 (\$7669.88),

OtC:\$8795 (\$10554.94)

Adjusted disease state specific:

TC:\$8574 (\$10289.71),

IC:\$3705 (\$4446.39),

PC:\$3850 (\$4620.41),

OtC:\$1884 (\$2261)

Unadjusted all cause:

TC:\$19362 (\$23236.46),

IC:\$5463 (\$6556.18),

PC:\$6158 (\$7390.26),

OtC:\$7740 (\$9288.82)

Unadjusted disease state specific:

TC:\$9156 (\$10988.18),

IC:\$3238 (\$3885.94),

PC:\$3789 (\$4547.20),

OtC:\$2129 (\$2555.03)

*Wei et al*[68]  
2014  
US

To examine the  
associations of  
adherence to  
antiparkinson drugs  
with healthcare  
utilisation and  
economic outcomes.

Design: retrospective  
cross-sectional study  
Follow Up: 19 months  
Sample Size: 7583 (90-  
100%:3948, 80-  
89%:1456, ≤79%:2179)

Measure: MPR  
Classification:  
(>90<100% = high,  
>80<89% =  
moderate, ≤79% =  
low)  
Method of  
Assessment:  
pharmacy claims  
data

Total costs  
Inpatient costs  
Outpatient  
costs  
Pharmacy  
costs

Type of Costs: unadjusted

Classification: disease state specific

Currency Year: USD, 2007

Cost of Nonadherence:

TC(90-100):\$36407 (\$41293.43),

TC(80-89):\$43417 (\$49244.29),

TC(≤79):\$45867 (\$52023.13),

IC(90-100):\$15294 (\$17346.71),

IC(80-89):\$21603 (\$24502.49),

IC(≤79):\$24727 (\$28045.78),

OC(90-100):\$10155 (\$11517.97),

Quality: medium

Classification: cost  
description

|    |                           |                         |                              |                        |                                  |                                                 |
|----|---------------------------|-------------------------|------------------------------|------------------------|----------------------------------|-------------------------------------------------|
| 1  |                           |                         |                              |                        |                                  |                                                 |
| 2  |                           |                         |                              |                        |                                  |                                                 |
| 3  |                           |                         |                              |                        |                                  |                                                 |
| 4  |                           |                         |                              |                        | OC(80-89):\$11838 (\$13426.86),  |                                                 |
| 5  |                           |                         |                              |                        | OC(≤79):\$12889 (\$14618.92),    |                                                 |
| 6  |                           |                         |                              |                        | PC(90-100):\$10957 (\$12427.61), |                                                 |
| 7  |                           |                         |                              |                        | PC(80-89):\$9976 (\$11314.95),   |                                                 |
| 8  |                           |                         |                              |                        | PC(≤79):\$8251 (\$9358.42)       |                                                 |
| 9  | <b>Musculoskeletal</b>    |                         |                              |                        |                                  |                                                 |
| 10 | <i>Ivanova et al</i> [69] | To compare the rates    | <u>Design:</u> retrospective | <u>Measure:</u> MPR    | Total costs                      | <u>Type of Costs:</u> unadjusted                |
| 11 | 2012                      | of severe relapse and   | cohort study                 | <u>Classification:</u> | Total                            | <u>Classification:</u> all cause, disease state |
| 12 | US                        | total direct and        | <u>Follow Up:</u> 2 years    | (≥80% = adherent,      | healthcare                       | specific and indirect                           |
| 13 |                           | indirect costs over a 2 | <u>Sample Size:</u> 648      | <80% =                 | costs                            | <u>Currency Year:</u> USD, 2007                 |
| 14 |                           | year period between     | (A:448, NA:200)              | nonadherent)           | Inpatient costs                  | <u>Cost of Nonadherence</u> *:                  |
| 15 |                           | US based employees      |                              | <u>Method of</u>       | Outpatient                       | All cause:                                      |
| 16 |                           | with MS who were        |                              | <u>Assessment:</u>     | costs                            | TC:\$8079 (\$9276.76),                          |
| 17 |                           | adherent and non-       |                              | pharmacy claims        | ED costs                         | THC:\$6022 (\$6830.25),                         |
| 18 |                           | adherent to disease     |                              | data                   | Pharmacy                         | IC:\$1030.50 (\$1168.81),                       |
| 19 |                           | modifying drugs.        |                              |                        | costs                            | OC:\$3231 (\$3664.65),                          |
| 20 |                           |                         |                              |                        | Medical costs                    | EDC:\$143.50 (\$162.76),                        |
| 21 |                           |                         |                              |                        | Short term                       | PC:\$1617 (\$1834.03),                          |
| 22 |                           |                         |                              |                        | disability costs                 | MC:\$4405.50 (\$4996.79)                        |
| 23 |                           |                         |                              |                        | Absenteeism                      | Disease state specific:                         |
| 24 |                           |                         |                              |                        | cost                             | TC:\$3005 (\$3408.32),                          |
| 25 |                           |                         |                              |                        |                                  | IC:\$505 (\$572.78),                            |
| 26 |                           |                         |                              |                        |                                  | OC:\$1710 (\$1939.51),                          |
| 27 |                           |                         |                              |                        |                                  | EDC:\$37 (\$41.97),                             |
| 28 |                           |                         |                              |                        |                                  | PC:\$753 (\$854.07),                            |
| 29 |                           |                         |                              |                        |                                  | MC:\$2252 (\$2554.26)                           |
| 30 |                           |                         |                              |                        |                                  | Indirect:                                       |
| 31 |                           |                         |                              |                        |                                  | STDC:\$1231 (\$1396.22),                        |
| 32 |                           |                         |                              |                        |                                  | AbC:\$826 (\$936.86)                            |
| 33 |                           |                         |                              |                        |                                  |                                                 |
| 34 |                           |                         |                              |                        |                                  |                                                 |
| 35 |                           |                         |                              |                        |                                  |                                                 |
| 36 |                           |                         |                              |                        |                                  |                                                 |
| 37 | <i>Tan et al</i> [70]     | To assess the impact of | <u>Design:</u> retrospective | <u>Measure:</u> MPR    | Medical costs                    | <u>Type of Costs:</u> adjusted and unadjusted   |
| 38 | 2011                      | treatment adherence     | cohort study                 | <u>Classification:</u> |                                  | <u>Classification:</u> disease state specific   |
| 39 | US                        | on MS related           | <u>Follow Up:</u> 12 months  | (≥80% = adherent,      |                                  | <u>Currency Year:</u> USD, 2007                 |
| 40 |                           | hospitalizations        | <u>Sample Size:</u> 2446     | <80% =                 |                                  | <u>Cost of Nonadherence:</u>                    |
| 41 |                           |                         |                              |                        |                                  |                                                 |
| 42 |                           |                         |                              |                        |                                  |                                                 |
| 43 |                           |                         |                              |                        |                                  |                                                 |
| 44 |                           |                         |                              |                        |                                  |                                                 |
| 45 |                           |                         |                              |                        |                                  |                                                 |
| 46 |                           |                         |                              |                        |                                  |                                                 |
| 47 |                           |                         |                              |                        |                                  |                                                 |

|    |                         |                          |                              |                        |                       |                                               |
|----|-------------------------|--------------------------|------------------------------|------------------------|-----------------------|-----------------------------------------------|
| 1  |                         |                          |                              |                        |                       |                                               |
| 2  |                         |                          |                              |                        |                       |                                               |
| 3  |                         | (inpatient), ER visits,  | (A:1459, NA:987)             | nonadherent)           | Adjusted:             |                                               |
| 4  |                         | MS relapses and          |                              | <u>Method of</u>       | MC:\$4348 (\$5062.49) |                                               |
| 5  |                         | medical costs.           |                              | <u>Assessment:</u>     | Unadjusted:           |                                               |
| 6  |                         |                          |                              | pharmacy claims        | MC:\$5179 (\$6030.04) |                                               |
| 7  |                         |                          |                              | data                   |                       |                                               |
| 8  |                         |                          |                              |                        |                       |                                               |
| 9  | <b>Zhao et al[71]</b>   | To examine predictors    | <u>Design:</u> retrospective | <u>Measure:</u> MPR    | Total costs           | <u>Type of Costs:</u> adjusted                |
| 10 | 2011                    | associated with          | cohort analysis              | <u>Classification:</u> | Inpatient costs       | <u>Classification:</u> disease state specific |
| 11 | US                      | duloxetine adherence     | <u>Follow Up:</u> 12 months  | (≥80% = adherent,      | Outpatient            | <u>Currency Year:</u> USD, 2008               |
| 12 |                         | and its association with | <u>Sample Size:</u> 5435     | <80% =                 | costs                 | <u>Cost of Nonadherence:</u> commercial:      |
| 13 |                         | healthcare costs         | (A:1744, NA:3691)            | nonadherent)           | Pharmacy              | TC:\$20323 (\$22609.12),                      |
| 14 |                         | among fibromyalgia       |                              | <u>Method of</u>       | costs                 | IC:\$4808 (\$5348.85),                        |
| 15 |                         | patients.                |                              | <u>Assessment:</u>     |                       | OC:\$9822 (\$10926.87),                       |
| 16 |                         |                          |                              | pharmacy claims        |                       | PC:\$5693 (\$6333.40)                         |
| 17 |                         |                          |                              | data                   |                       | <u>Medicare:</u>                              |
| 18 |                         |                          |                              |                        |                       | TC:\$25282 (\$28125.96),                      |
| 19 |                         |                          |                              |                        |                       | IC:\$8604 (\$9571.86),                        |
| 20 |                         |                          |                              |                        |                       | OC:\$10068 (\$11200.54),                      |
| 21 |                         |                          |                              |                        |                       | PC:\$6611 (\$7354.67)                         |
| 22 |                         |                          |                              |                        |                       |                                               |
| 23 |                         |                          |                              |                        |                       |                                               |
| 24 | <b>Cancer</b>           |                          |                              |                        |                       |                                               |
| 25 | <b>Darkow et al[72]</b> | Estimate the             | <u>Design:</u> retrospective | <u>Measure:</u> MPR    | Total                 | <u>Type of Costs:</u> unadjusted              |
| 26 | 2007                    | association between      | observational cohort         | <u>Classification:</u> | healthcare            | <u>Classification:</u> disease state specific |
| 27 | US                      | treatment                | analysis                     | (≥95% = very high,     | costs                 | <u>Currency Year:</u> USD, 2004               |
| 28 |                         | interruptions and non-   | <u>Follow Up:</u> 12 months  | >90<95% = high,        | Inpatient costs       | <u>Cost of Nonadherence:</u>                  |
| 29 |                         | adherence with           | <u>Sample Size:</u> 267      | >50<90% =              | Outpatient            | THC(≥95):\$42250 (\$52330.90),                |
| 30 |                         | imatinib and             | (≥95%:120, 90-95%:25,        | intermediate,          | costs                 | THC(90-95):\$39236 (\$48597.76),              |
| 31 |                         | healthcare costs for US  | 50-90%:69, <50%:53)          | <50% = low)            | ED costs              | THC(50-90):\$54770 (\$67838.19),              |
| 32 |                         | managed care patients.   |                              | <u>Method of</u>       | Pharmacy              | THC(<50):\$131357 (\$162698.93),              |
| 33 |                         |                          |                              | <u>Assessment:</u>     | costs                 | IC(≥95):\$1156 (\$1431.82),                   |
| 34 |                         |                          |                              | pharmacy claims        | Medical costs         | IC(90-95):\$1362 (\$1686.97),                 |
| 35 |                         |                          |                              | data                   | Other                 | IC(50-90):\$19096 (\$23652.33),               |
| 36 |                         |                          |                              |                        | pharmacy              | IC(<50):\$81572 (\$101035.18),                |
| 37 |                         |                          |                              |                        | costs                 | OC(≥95):\$9299 (\$11517.75),                  |
| 38 |                         |                          |                              |                        | Other costs           | OC(90-95):\$11148 (\$13807.93),               |
| 39 |                         |                          |                              |                        |                       |                                               |
| 40 |                         |                          |                              |                        |                       |                                               |
| 41 |                         |                          |                              |                        |                       |                                               |
| 42 |                         |                          |                              |                        |                       |                                               |
| 43 |                         |                          |                              |                        |                       |                                               |
| 44 |                         |                          |                              |                        |                       |                                               |
| 45 |                         |                          |                              |                        |                       |                                               |
| 46 |                         |                          |                              |                        |                       |                                               |
| 47 |                         |                          |                              |                        |                       |                                               |

For peer review

OC(50-90):\$14631 (\$18121.97),  
 OC(<50):\$33956 (\$42057.94),  
 EDC(≥95):\$36 (\$44.59),  
 EDC(90-95):\$568 (\$703.53),  
 EDC(50-90):\$104 (\$128.81),  
 EDC(<50):\$183 (\$226.66),  
 PC(≥95):\$29056 (\$35988.80),  
 PC(90-95):\$23693 (\$29346.18),  
 PC(50-90):\$18330 (\$22703.56),  
 PC(<50):\$8733 (\$10816.70),  
 MC(≥95):\$10731 (\$13291.43),  
 MC(90-95):\$13452 (\$16661.66),  
 MC(50-90):\$34202 (\$42362.64),  
 MC(<50):\$116892  
 (\$144782.57),OtPC(≥95):\$2462  
 (\$3049.44),  
 OtPC(90-95):\$2091 (\$2589.92),  
 OtPC(50-90):\$2238 (\$2771.99),  
 OtPC(<50):\$5732 (\$7099.66),  
 OtC(≥95):\$241 (\$298.50),  
 OtC(90-95):\$374 (\$463.24),  
 OtC(50-90):\$371 (\$459.52),  
 OtC(<50):\$1181 (\$1462.79)

30 *Wu et al*[73]  
 31 2010  
 32 US

To examine the  
 association between  
 adherence with  
 imatinib and direct  
 healthcare costs and  
 resource utilisation

Design: retrospective  
 observational cohort  
 analysis  
Follow Up: 12 months  
Sample Size: 592  
 (A:350, NA:242)

Measure: MPR  
Classification:  
 (≥85% = high  
 adherence, <85%  
 = low adherence )  
Method of  
Assessment:  
 pharmacy claims  
 data

Total costs  
 Inpatient costs  
 Outpatient  
 costs  
 ED costs  
 Pharmacy  
 costs  
 Other  
 pharmacy  
 costs

Type of Costs: unadjusted  
Classification: disease state specific  
Currency Year: USD, 2008  
Cost of Nonadherence:  
 TC:\$107341 (\$119415.73),  
 IC:\$44498 (\$49503.55),  
 OC:\$34097 (\$37932.55),  
 EDC:\$248 (\$275.90),  
 PC:\$22846 (\$25415.93),  
 OtPC:\$5652 (\$6287.79)

Quality: medium  
Classification: cost  
 description

## Addiction

|    |                          |                        |                                 |                        |                 |                                               |
|----|--------------------------|------------------------|---------------------------------|------------------------|-----------------|-----------------------------------------------|
| 1  |                          |                        |                                 |                        |                 |                                               |
| 2  |                          |                        |                                 |                        |                 |                                               |
| 3  |                          |                        |                                 |                        |                 |                                               |
| 4  | <b>Leider et al[74]</b>  | To assess the economic | <u>Design:</u> retrospective    | <u>Measure:</u> urine  | Total           | <u>Type of Costs:</u> unadjusted              |
| 5  | 2011                     | burden of chronic      | claims based analysis           | testing                | healthcare      | <u>Classification:</u> disease state specific |
| 6  | US                       | opioid users and to    | <u>Follow Up:</u> 12 months     | <u>Classification:</u> | costs           | <u>Currency Year:</u> USD, 2008               |
| 7  |                          | determine whether      | <u>Sample Size:</u> 2100        | (positive test =       | Inpatient costs | <u>Cost of Nonadherence:</u>                  |
| 8  |                          | opioid regimen non-    | (A:442, NA:1658)                | nonadherent,           | Outpatient      | THC:\$26433 (\$29406.43),                     |
| 9  |                          | adherence contributes  |                                 | negative test =        | costs           | IC:\$6361 (\$7076.55),                        |
| 10 |                          | to increased           |                                 | adherent )             | ED costs        | OC:\$9734 (\$10828.97),                       |
| 11 |                          | healthcare costs.      |                                 | <u>Method of</u>       | Pharmacy        | EDC:\$421 (\$468.36),                         |
| 12 |                          |                        |                                 | <u>Assessment:</u>     | costs           | PC:\$7960 (\$8855.42),                        |
| 13 |                          |                        |                                 | health claims data     | Medical costs   | MC:\$1957 (\$2177.14)                         |
| 14 |                          |                        |                                 | <u>Measure:</u> MPR    | Total           | <u>Type of Costs:</u> unadjusted              |
| 15 |                          |                        |                                 | <u>Classification:</u> | healthcare      | <u>Classification:</u> disease state specific |
| 16 | <b>Ruetsch et al[75]</b> | To examine patient     | <u>Design:</u> cross sectional, | (≥80% = adherent,      | costs           | <u>Currency Year:</u> USD, 2013               |
| 17 | 2017                     | characteristics and    | retrospective analysis          | <80% =                 | Inpatient costs | <u>Cost of Nonadherence:</u>                  |
| 18 | US                       | outcomes associated    | health claims data              | nonadherent)           | Outpatient      | THC:\$16555 (\$16995.62),                     |
| 19 |                          | with nonadherence to   | <u>Follow Up:</u> 12 months     | <u>Method of</u>       | costs           | IC:\$5657 (\$5807.57),                        |
| 20 |                          | buprenorphine and to   | <u>Sample Size:</u> 477         | <u>Assessment:</u>     | ED costs        | OC:\$5594 (\$5742.89),                        |
| 21 |                          | identify specific      | (A:172, NA:305)                 | health claims data     | Pharmacy        | EDC:\$1147 (\$1177.53),                       |
| 22 |                          | patterns of            |                                 |                        | costs           | PC:\$2365 (\$2427.95),                        |
| 23 |                          | nonadherent            |                                 |                        | Physician       | POC:\$1765 (\$1811.98),                       |
| 24 |                          | behaviour.             |                                 |                        | office visit    | MC:\$14190 (\$14567.68)                       |
| 25 |                          |                        |                                 |                        | costs           |                                               |
| 26 |                          |                        |                                 |                        | Medical costs   |                                               |
| 27 |                          |                        |                                 |                        | Total           | <u>Type of Costs:</u> adjusted and unadjusted |
| 28 |                          |                        |                                 |                        | healthcare      | <u>Classification:</u> disease state specific |
| 29 |                          |                        |                                 |                        | costs           | <u>Currency Year:</u> USD, 2010               |
| 30 |                          |                        |                                 |                        | Inpatient costs | <u>Cost of Nonadherence:</u>                  |
| 31 | <b>Tkacz et al[76]</b>   | To estimate the        | <u>Design:</u> retrospective    | <u>Measure:</u> MPR    | Total           | <u>Type of Costs:</u> adjusted and unadjusted |
| 32 | 2014                     | healthcare service     | cohort analysis                 | <u>Classification:</u> | healthcare      | <u>Classification:</u> disease state specific |
| 33 | US                       | utilisation and costs  | <u>Follow Up:</u> 12 months     | (≥80% = adherent,      | costs           | <u>Currency Year:</u> USD, 2010               |
| 34 |                          | associated with        | <u>Sample Size:</u> 455         | <80% =                 | Inpatient costs | <u>Cost of Nonadherence:</u>                  |
| 35 |                          | buprenorphine          | (A:146, NA:309)                 | nonadherent)           | Outpatient      | Adjusted:                                     |
| 36 |                          | medication assisted    |                                 | <u>Method of</u>       | costs           | THC:\$49051 (\$53503.88),                     |
| 37 |                          | therapy adherence      |                                 | <u>Assessment:</u>     | ED costs        | IC:\$26470 (\$28872.96),                      |
| 38 |                          | among a sample of      |                                 | pharmacy claims        | Pharmacy        | OC:\$14570 (\$15892.67),                      |
| 39 |                          | opioid dependent       |                                 | data                   | costs           | EDC:\$4439 (\$4841.98),                       |
| 40 |                          |                        |                                 |                        |                 |                                               |
| 41 |                          |                        |                                 |                        |                 |                                               |
| 42 |                          |                        |                                 |                        |                 |                                               |
| 43 |                          |                        |                                 |                        |                 |                                               |
| 44 |                          |                        |                                 |                        |                 |                                               |
| 45 |                          |                        |                                 |                        |                 |                                               |
| 46 |                          |                        |                                 |                        |                 |                                               |
| 47 |                          |                        |                                 |                        |                 |                                               |



members.

PC:\$3581 (\$3906.09)  
 Unadjusted:  
 THC:\$47868 (\$52213.49),  
 IC:\$26043 (\$28407.20),  
 OC:\$14173 (\$15459.63),  
 EDC:\$4058 (\$4426.39),  
 PC:\$3557 (\$3879.91)

**Metabolic conditions other than diabetes mellitus**

*Lee et al*[77]  
 2011  
 US

To assess the relationship between medication adherence and healthcare costs among US patients on dialysis given cinacalcet to manage secondary hypoparathyroidism.

Design: retrospective cohort study  
Follow Up: 12 months  
Sample Size: 4923 (A:1372, NA:1304)

Measure: MPR  
Classification: (≥80% = high adherent, <80% = low adherent)  
Method of Assessment: pharmacy claims data

Total costs  
 Inpatient costs  
 Outpatient costs  
 ED costs  
 Pharmacy costs  
 Other pharmacy costs

Type of Costs: unadjusted  
Classification: all cause and disease state specific  
Currency Year: USD, 2010  
Cost of Nonadherence:  
 All cause:  
 PC:\$5556 (\$6060.38)  
 Disease state specific:  
 TC:\$126996 (\$138524.78),  
 IC:\$14844 (\$16191.55),  
 OC:\$101854 (\$111100.37),  
 EDC:\$734 (\$800.63),  
 PC:\$3244 (\$3538.49),  
 OtPC:\$9564 (\$10432.23)

Quality: medium  
Classification: cost description

**Blood**

*Candrilli et al*[78]  
 2011  
 US

To investigate the relationships among hydroxyurea adherence, healthcare utilisation and healthcare costs.

Design: retrospective longitudinal study  
Follow Up: 12 months  
Sample Size: 312 (A:110, NA:202)

Measure: MPR  
Classification: (≥80% = adherent, <80% = nonadherent)  
Method of Assessment:

Total costs  
 Inpatient costs  
 ED costs  
 Pharmacy costs  
 Physician office visit

Type of Costs: adjusted  
Classification: all cause and disease state specific  
Currency Year: USD, 2008  
Cost of Nonadherence:  
 All cause:  
 TC:\$ 20436 (\$22734.83),

Quality: medium  
Classification: cost description

1  
2  
3  
4  
5  
6  
7  
8  
9  
10  
11  
12  
13  
14  
15  
16  
17  
18  
19  
20  
21  
22  
23  
24  
25  
26  
27  
28  
29  
30  
31  
32  
33  
34  
35  
36  
37  
38  
39  
40  
41  
42  
43  
44  
45  
46  
47

For peer review only

|                      |                 |                                                                                                                                                                                    |
|----------------------|-----------------|------------------------------------------------------------------------------------------------------------------------------------------------------------------------------------|
| pharmacy claims data | costs           | IC:\$9780 (\$10880.15),<br>EDC:\$837 (\$931.15),<br>PC:\$2579 (\$2869.11),<br>POC:\$3483 (\$3874.80),<br>AC:\$3911 (\$4350.95)                                                     |
|                      | Ancillary costs | Disease state specific:<br>TC:\$12097 (\$13457.78),<br>IC:\$7315 (\$8137.86),<br>EDC:\$552 (\$614.09),<br>PC:\$158 (\$175.77),<br>POC:\$1865 (\$2074.79),<br>AC:\$2466 (\$2743.40) |

|                                             |                                                                                                                                                                   |                                                                                                                         |                                                                                                                                                                    |                       |                                                                                                                                                                                                   |                                                                        |
|---------------------------------------------|-------------------------------------------------------------------------------------------------------------------------------------------------------------------|-------------------------------------------------------------------------------------------------------------------------|--------------------------------------------------------------------------------------------------------------------------------------------------------------------|-----------------------|---------------------------------------------------------------------------------------------------------------------------------------------------------------------------------------------------|------------------------------------------------------------------------|
| <b>All</b>                                  |                                                                                                                                                                   |                                                                                                                         |                                                                                                                                                                    |                       |                                                                                                                                                                                                   |                                                                        |
| <i>Alvarez Payero et al</i> <sup>[79]</sup> | To determine the profile of patients who are admitted to hospital as a result of non-adherence and to obtain an estimate of the economic impact for the hospital. | <u>Design:</u> retrospective observational study<br><u>Follow Up:</u> 1527 days<br><u>Sample Size:</u> 87 (A:21, NA:66) | <u>Measure:</u> pharmacy records<br><u>Classification:</u> (>75% = adherent, ≤75% = nonadherent)<br><u>Method of Assessment:</u> pharmacy and hospital claims data | Hospitalization costs | <u>Type of Costs:</u> unadjusted<br><u>Classification:</u> all cause<br><u>Currency Year:</u> EUR, 2012<br><u>Cost of Nonadherence</u> <sup>####</sup> :<br>All cause:<br>HC:€6275.80 (\$8893.94) | <u>Quality:</u> low<br><u>Classification:</u> cost outcome description |

A: adherent, NA: nonadherent, MA: moderate adherence, LA: low adherence, NC: noncompliance, NP: nonpersistent, P: persistent, T: turbulent, NE: no exposure, CHF: chronic heart failure, THC: total healthcare costs, TC: total costs, IC: inpatient costs, OC: outpatient costs, EDC: emergency department visit costs, PC: pharmacy costs, MC: medical costs, HC: hospitalization costs, POC: physician office visit costs, NPC: non-pharmacy costs, AC: ancillary costs, OtPC: other pharmacy costs, PAC: psychiatric assessment costs, TCMC: targeted case management costs, ArC: arrest costs, InC: incarceration costs, RC: radiology costs, SC: services costs, InstC: institutional costs, ESC: external services costs, MSC: medical services costs, PCC: primary care costs, MTC: medical test costs, FC: fracture costs, LC: laboratory costs, IntC: interdisciplinary costs, BHIC: behavioural health inpatient costs, STDC: short term disability costs, WCC: workers compensation costs, PTOC: paid time off costs, TPC: total productivity costs, AbC: absenteeism costs, PrC: presenteeism costs, ACC: acute care

1  
2  
3 costs, OtC: other costs, com: commercial patients, med: Medicare supplemental patients, USD: United States dollar, GBP: Great British Pound, EUR: Euro,  
4 DKK: Danish krone, CAD: Canadian dollar, KRW: South Korean won  
5

6  
7 \*: extrapolated annual cost; \*\*: subgroups averaged; \*\*\*: national estimate of cost; \*\*\*\*: negative value as costs modelled against lowest adherence group;  
8 #: extrapolated annual cost and subgroups averaged; ##: cost represents losses in workplace productivity; ###: negative value as costs modelled against  
9 adherent group; ####: cost per episode of nonadherence  
10  
11  
12  
13  
14  
15  
16  
17  
18  
19  
20  
21  
22  
23  
24  
25  
26  
27  
28  
29  
30  
31  
32  
33  
34  
35  
36  
37  
38  
39  
40  
41  
42  
43  
44  
45  
46  
47

1. Aubert RE, Yao J, Xia F, et al. Is there a relationship between early statin compliance and a reduction in healthcare utilization? *The American journal of managed care* 2010;**16**:459-66
2. Casciano JP, Dotiwala ZJ, Martin BC, et al. The costs of warfarin underuse and nonadherence in patients with atrial fibrillation: a commercial insurer perspective. *Journal of managed care pharmacy : JMCP* 2013;**19**:302-16
3. Dilokthornsakul P, Chaiyakunapruk N, Nimpitakpong P, et al. The Effects of Medication Supply on Hospitalizations and Health-Care Costs in Patients with Chronic Heart Failure. *Value in Health* 2012;**15**:S9-S14 doi: 10.1016/j.jval.2011.11.019[published Online First: Epub Date]].
4. Dragomir A, Côté R, Roy L, et al. Impact of adherence to antihypertensive agents on clinical outcomes and hospitalization costs. *Medical care* 2010;**48**:418-25 doi: 10.1097/MLR.0b013e3181d567bd[published Online First: Epub Date]].
5. Dragomir A, Cote R, White M, et al. Relationship between adherence level to statins, clinical issues and health-care costs in real-life clinical setting. *Value in health : the journal of the International Society for Pharmacoeconomics and Outcomes Research* 2010;**13**(1):87-94 doi: 10.1111/j.1524-4733.2009.00583.x[published Online First: Epub Date]].
6. Pittman DG, Chen W, Bowlin SJ, et al. Adherence to statins, subsequent healthcare costs, and cardiovascular hospitalizations. *The American journal of cardiology* 2011;**107**:1662-6 doi: 10.1016/j.amjcard.2011.01.052[published Online First: Epub Date]].
7. Pittman DG, Tao Z, Chen W, et al. Antihypertensive medication adherence and subsequent healthcare utilization and costs. *The American journal of managed care* 2010;**16**:568-76
8. Rizzo JAS, W. R. Variations in compliance among hypertensive patients by drug class: implications for health care costs. *Clinical therapeutics* 1997;**19**(6):1446-57; discussion 24-5
9. Sokol MC, McGuigan KA, Verbrugge RR, et al. Impact of medication adherence on hospitalization risk and healthcare cost. *Medical care* 2005;**43**:521-30
10. Stroupe KT, Teal EY, Tu W, et al. Association of Refill Adherence and Health Care Use Among Adults with Hypertension in an Urban Health Care System. *Pharmacotherapy* 2006;**26**:779-89 doi: 10.1592/phco.26.6.779[published Online First: Epub Date]].
11. Wu J, Seiber E, Lacombe VA, et al. Medical utilization and costs associated with statin adherence in Medicaid enrollees with type 2 diabetes. *The Annals of pharmacotherapy* 2011;**45**:342-9 doi: 10.1345/aph.1P539[published Online First: Epub Date]].
12. Zhao Y, Zabriski S, Bertram C. Associations between statin adherence level, health care costs, and utilization. *Journal of managed care & specialty pharmacy* 2014;**20**:703-13
13. Bagalman E, Yu-Isenberg KS, Durden E, et al. Indirect costs associated with nonadherence to treatment for bipolar disorder. *Journal of occupational and environmental medicine / American College of Occupational and Environmental Medicine* 2010;**52**:478-85 doi: 10.1097/JOM.0b013e3181db811d[published Online First: Epub Date]].
14. Becker MA, Young MS, Ochshorn E, et al. The relationship of antipsychotic medication class and adherence with treatment outcomes and costs for Florida Medicaid beneficiaries with schizophrenia. *Administration and policy in mental health* 2007;**34**:307-14 doi: 10.1007/s10488-006-0108-5[published Online First: Epub Date]].
15. Eaddy M, Grogg A, Locklear J. Assessment of compliance with antipsychotic treatment and resource utilization in a Medicaid population. *Clinical therapeutics* 2005;**27**:263-72 doi: 10.1016/j.clinthera.2005.02.003[published Online First: Epub Date]].

16. Gilmer TP, Dolder CR, Lacro JP, et al. Adherence to treatment with antipsychotic medication and health care costs among Medicaid beneficiaries with schizophrenia. *The American journal of psychiatry* 2004;**161**:692-9
17. Hong J, Reed C, Novick D, et al. Clinical and economic consequences of medication non-adherence in the treatment of patients with a manic/mixed episode of bipolar disorder: results from the European Mania in Bipolar Longitudinal Evaluation of Medication (EMBLEM) study. *Psychiatry research* 2011;**190**:110-4 doi: 10.1016/j.psychres.2011.04.016[published Online First: Epub Date] |.
18. Jiang Y, Ni W. Estimating the Impact of Adherence to and Persistence with Atypical Antipsychotic Therapy on Health Care Costs and Risk of Hospitalization. *Pharmacotherapy* 2015;**35**(9):813-22 doi: 10.1002/phar.1634[published Online First: Epub Date] |.
19. Joe S, Lee JS. Association between non-compliance with psychiatric treatment and non-psychiatric service utilization and costs in patients with schizophrenia and related disorders. *BMC psychiatry* 2016;**16**(1):444 doi: 10.1186/s12888-016-1156-3[published Online First: Epub Date] |.
20. Knapp M, King D, Pugner K, et al. Non-adherence to antipsychotic medication regimens: associations with resource use and costs. *The British journal of psychiatry : the journal of mental science* 2004;**184**:509-16
21. Offord S, Lin J, Mirski D, et al. Impact of early nonadherence to oral antipsychotics on clinical and economic outcomes among patients with schizophrenia. *Advances in therapy* 2013;**30**:286-97 doi: 10.1007/s12325-013-0016-5[published Online First: Epub Date] |.
22. Offord S, Lin J, Wong B, et al. Impact of oral antipsychotic medication adherence on healthcare resource utilization among schizophrenia patients with Medicare coverage. *Community mental health journal* 2013;**49**:625-9 doi: 10.1007/s10597-013-9638-y[published Online First: Epub Date] |.
23. Robertson AG, Swanson JW, Van Dorn RA, et al. Treatment participation and medication adherence: effects on criminal justice costs of persons with mental illness. *Psychiatric services (Washington, DC)* 2014;**65**(10):1189-91 doi: 10.1176/appi.ps.201400247[published Online First: Epub Date] |.
24. Robinson RL, Long SR, Chang S, et al. Higher costs and therapeutic factors associated with adherence to NCQA HEDIS antidepressant medication management measures: analysis of administrative claims. *Journal of managed care pharmacy : JMCP* 2006;**12**:43-54
25. Svarstad BL, Shireman TI, Sweeney JK. Using drug claims data to assess the relationship of medication adherence with hospitalization and costs. *Psychiatric services (Washington, DC)* 2001;**52**:805-11
26. White TJV, Ann; Ory, Caron; Dezii, Christopher M.; Chang, Eunice. Economic Impact of Patient Adherence with Antidepressant Therapy Within a Managed Care Organization. *Disease Management & Health Outcomes* 2003;**11**(12):817-22 doi: 10.2165/00115677-200311120-00006[published Online First: Epub Date] |.
27. An S-Y, Kim HJ, Chun KH, et al. Clinical and economic outcomes in medication-adherent and -nonadherent patients with type 2 diabetes mellitus in the Republic of Korea. *Clinical therapeutics* 2014;**36**:245-54 doi: 10.1016/j.clinthera.2013.12.012[published Online First: Epub Date] |.
28. Buysman EK, Anderson A, Bacchus S, et al. Retrospective Study on the Impact of Adherence in Achieving Glycemic Goals in Type 2 Diabetes Mellitus Patients Receiving Canagliflozin. *Adv Ther* 2017;**34**(4):937-53 doi: 10.1007/s12325-017-0500-4[published Online First: Epub Date] |.
29. Curtis SE, Boye KS, Lage MJ, et al. Medication adherence and improved outcomes among patients with type 2 diabetes. *The American journal of managed care* 2017;**23**(7):e208-e14
30. Egede LE, Gebregziabher M, Dismuke CE, et al. Medication Nonadherence in Diabetes: Longitudinal effects on costs and potential cost savings from improvement. *Diabetes care* 2012;**35**:2533-39 doi: 10.2337/dc12-0572[published Online First: Epub Date] |.

- 1
- 2
- 3
- 4 31. Gentil L, Vasiliadis HM, Preville M, et al. Adherence to Oral Antihyperglycemic Agents Among Older Adults With Mental Disorders and Its Effect on
- 5 Health Care Costs, Quebec, Canada, 2005-2008. *Preventing chronic disease* 2015;**12**:E230 doi: 10.5888/pcd12.150412[published Online First: Epub
- 6 Date]].
- 7 32. Hagen SE, Wright DW, Finch R, et al. Impact of compliance to oral hypoglycemic agents on short-term disability costs in an employer population.
- 8 *Population health management* 2014;**17**:35-41 doi: 10.1089/pop.2013.0009[published Online First: Epub Date]].
- 9 33. Hansen RA, Farley JF, Droege M, et al. A retrospective cohort study of economic outcomes and adherence to monotherapy with metformin,
- 10 pioglitazone, or a sulfonylurea among patients with type 2 diabetes mellitus in the United States from 2003 to 2005. *Clinical therapeutics*
- 11 2010;**32**:1308-19 doi: 10.1016/j.clinthera.2010.07.011[published Online First: Epub Date]].
- 12 34. Hong JS, Kang HC. Relationship between oral antihyperglycemic medication adherence and hospitalization, mortality, and healthcare costs in adult
- 13 ambulatory care patients with type 2 diabetes in South Korea. *Medical care* 2011;**49**:378-84 doi: 10.1097/MLR.0b013e31820292d1[published
- 14 Online First: Epub Date]].
- 15 35. Jha AK, Aubert RE, Yao J, et al. Greater adherence to diabetes drugs is linked to less hospital use and could save nearly \$5 billion annually. *Health affairs*
- 16 (Project Hope) 2012;**31**:1836-46 doi: 10.1377/hlthaff.2011.1198[published Online First: Epub Date]].
- 17 36. White TJV, Ann; Chang, Eunice; Dezii, Christopher M.; Abrams, Geoffrey D. The Costs of Non-Adherence to Oral Antihyperglycemic Medication in
- 18 Individuals with Diabetes Mellitus and Concomitant Diabetes Mellitus and Cardiovascular Disease in a Managed Care Environment. *Disease*
- 19 *Management & Health Outcomes* 2004;**12**(3):181-88 doi: 10.2165/00115677-200412030-00004[published Online First: Epub Date]].
- 20 37. Wu N, Chen S, Boulanger L, et al. Duloxetine compliance and its association with healthcare costs among patients with diabetic peripheral neuropathic
- 21 pain. *Journal of medical economics* 2009;**12**:192-202 doi: 10.3111/13696990903240559[published Online First: Epub Date]].
- 22 38. Briesacher BA, Andrade SE, Yood RA, et al. Consequences of poor compliance with bisphosphonates. *Bone* 2007;**41**:882-7 doi:
- 23 10.1016/j.bone.2007.07.009[published Online First: Epub Date]].
- 24 39. Eisenberg DF, Placzek H, Gu T, et al. Cost and consequences of noncompliance to oral bisphosphonate treatment. *Journal of managed care & specialty*
- 25 *pharmacy* 2015;**21**(1):56-65 doi: 10.18553/jmcp.2015.21.1.56[published Online First: Epub Date]].
- 26 40. Halpern R, Becker L, Iqbal SU, et al. The association of adherence to osteoporosis therapies with fracture, all-cause medical costs, and all-cause
- 27 hospitalizations: a retrospective claims analysis of female health plan enrollees with osteoporosis. *Journal of managed care pharmacy : JMCP*
- 28 2011;**17**:25-39
- 29 41. Hazel-Fernandez L, Louder AM, Foster SA, et al. Association of teriparatide adherence and persistence with clinical and economic outcomes in Medicare
- 30 Part D recipients: a retrospective cohort study. *BMC musculoskeletal disorders* 2013;**14**:4 doi: 10.1186/1471-2474-14-4[published Online First: Epub
- 31 Date]].
- 32 42. Huybrechts KF, Ishak KJ, Caro JJ. Assessment of compliance with osteoporosis treatment and its consequences in a managed care population. *Bone*
- 33 2006;**38**:922-8 doi: 10.1016/j.bone.2005.10.022[published Online First: Epub Date]].
- 34 43. Kjellberg J, Jorgensen AD, Vestergaard P, et al. Cost and health care resource use associated with noncompliance with oral bisphosphonate therapy: an
- 35 analysis using Danish health registries. *Osteoporosis International* 2016;**27**(12):3535-41 doi: 10.1007/s00198-016-3683-7[published Online First:
- 36 Epub Date]].
- 37
- 38
- 39
- 40
- 41
- 42
- 43
- 44
- 45
- 46
- 47

- 1
- 2
- 3
- 4 44. Modi A, Siris ES, Tang J, et al. Cost and consequences of noncompliance with osteoporosis treatment among women initiating therapy. *Current medical*
- 5 *research and opinion* 2015;**31**(4):757-65 doi: 10.1185/03007995.2015.1016605[published Online First: Epub Date]].
- 6 45. Olsen KR, Hansen C, Abrahamsen B. Association between refill compliance to oral bisphosphonate treatment, incident fractures, and health care costs--
- 7 an analysis using national health databases. *Osteoporosis international : a journal established as result of cooperation between the European*
- 8 *Foundation for Osteoporosis and the National Osteoporosis Foundation of the USA* 2013;**24**:2639-47 doi: 10.1007/s00198-013-2365-y[published
- 9 *Online First: Epub Date]].*
- 10 46. Sunycz JA, Mucha L, Baser O, et al. Impact of compliance and persistence with bisphosphonate therapy on health care costs and utilization.
- 11 *Osteoporosis international : a journal established as result of cooperation between the European Foundation for Osteoporosis and the National*
- 12 *Osteoporosis Foundation of the USA* 2008;**19**:1421-9 doi: 10.1007/s00198-008-0586-2[published Online First: Epub Date]].
- 13 47. Zhao Y, Johnston SS, Smith DM, et al. Association between teriparatide adherence and healthcare utilization and costs among hip fracture patients in
- 14 the United States. *Bone* 2014;**60**:221-6 doi: 10.1016/j.bone.2013.12.016[published Online First: Epub Date]].
- 15 48. Zhao Y, Johnston SS, Smith DM, et al. Association between teriparatide adherence and healthcare utilization and costs in real-world US
- 16 kyphoplasty/vertebroplasty patients. *Osteoporosis International* 2013;**24**:2525-33 doi: 10.1007/s00198-013-2324-7[published Online First: Epub
- 17 *Date]].*
- 18 49. Davis JR, Wu B, Kern DM, et al. Impact of Nonadherence to Inhaled Corticosteroid/LABA Therapy on COPD Exacerbation Rates and Healthcare Costs in a
- 19 Commercially Insured US Population. *American health & drug benefits* 2017;**10**(2):92-102
- 20 50. Delea TE, Stanford RH, Hagiwara M, et al. Association between adherence with fixed dose combination fluticasone propionate/salmeterol on asthma
- 21 outcomes and costs\*. *Current medical research and opinion* 2008;**24**:3435-42 doi: 10.1185/03007990802557344[published Online First: Epub
- 22 *Date]].*
- 23 51. Diehl JL, Daw JR, Coley KC, et al. Medical utilization associated with palivizumab compliance in a commercial and managed medicaid health plan. *Journal*
- 24 *of managed care pharmacy : JMCP* 2010;**16**:23-31
- 25 52. Joshi AV, Madhavan SS, Ambegaonkar A, et al. Association of medication adherence with workplace productivity and health-related quality of life in
- 26 patients with asthma. *The Journal of asthma : official journal of the Association for the Care of Asthma* 2006;**43**:521-6 doi:
- 27 10.1080/02770900600857010[published Online First: Epub Date]].
- 28 53. Miravittles M, Sicras A, Crespo C, et al. Costs of chronic obstructive pulmonary disease in relation to compliance with guidelines: a study in the primary
- 29 care setting. *Therapeutic advances in respiratory disease* 2013;**7**:139-50 doi: 10.1177/1753465813484080[published Online First: Epub Date]].
- 30 54. Quittner AL, Zhang J, Marynchenko M, et al. Pulmonary medication adherence and health-care use in cystic fibrosis. *Chest* 2014;**146**:142-51 doi:
- 31 10.1378/chest.13-1926[published Online First: Epub Date]].
- 32 55. Carter CT, Waters HC, Smith DB. Impact of infliximab adherence on Crohn's disease-related healthcare utilization and inpatient costs. *Advances in*
- 33 *therapy* 2011;**28**:671-83 doi: 10.1007/s12325-011-0048-7[published Online First: Epub Date]].
- 34 56. Gosselin A, Luo R, Lohoues H, et al. The impact of proton pump inhibitor compliance on health-care resource utilization and costs in patients with
- 35 gastroesophageal reflux disease. *Value in health : the journal of the International Society for Pharmacoeconomics and Outcomes Research*
- 36 2009;**12**:34-9 doi: 10.1111/j.1524-4733.2008.00399.x[published Online First: Epub Date]].
- 37
- 38
- 39
- 40
- 41
- 42
- 43
- 44
- 45
- 46
- 47

- 1
- 2
- 3
- 4 57. Kane SV, Chao J, Mulani PM. Adherence to infliximab maintenance therapy and health care utilization and costs by Crohn's disease patients. *Advances in*
- 5 *therapy* 2009;**26**:936-46 doi: 10.1007/s12325-009-0069-7[published Online First: Epub Date] |.
- 6 58. Mitra D, Hodgkins P, Yen L, et al. Association between oral 5-ASA adherence and health care utilization and costs among patients with active ulcerative
- 7 *colitis*. *BMC gastroenterology* 2012;**12**:132 doi: 10.1186/1471-230X-12-132[published Online First: Epub Date] |.
- 8 59. Wan GJ, Kozma CM, Slaton TL, et al. Inflammatory bowel disease: healthcare costs for patients who are adherent or non-adherent with infliximab
- 9 *therapy*. *Journal of medical economics* 2014;**17**:384-93 doi: 10.3111/13696998.2014.909436[published Online First: Epub Date] |.
- 10 60. Davis KLC, S. D.; Edin, H. M. Prevalence and cost of nonadherence with antiepileptic drugs in an adult managed care population. *Epilepsia*
- 11 2008;**49**(3):446-54 doi: 10.1111/j.1528-1167.2007.01414.x[published Online First: Epub Date] |.
- 12 61. Ettinger AB, Manjunath R, Candrilli SD, et al. Prevalence and cost of nonadherence to antiepileptic drugs in elderly patients with epilepsy. *Epilepsy &*
- 13 *behavior : E&B* 2009;**14**:324-9 doi: 10.1016/j.yebeh.2008.10.021[published Online First: Epub Date] |.
- 14 62. Faught RE, Weiner JR, Guérin A, et al. Impact of nonadherence to antiepileptic drugs on health care utilization and costs: findings from the RANSOM
- 15 *study*. *Epilepsia* 2009;**50**:501-9 doi: 10.1111/j.1528-1167.2008.01794.x[published Online First: Epub Date] |.
- 16 63. Barnett PG, Chow A, Joyce VR, et al. Determinants of the Cost of Health Services Used by Veterans With HIV. *Medical care* 2011;**49**:848-56 doi:
- 17 10.1097/MLR.0b013e31821b34c0[published Online First: Epub Date] |.
- 18 64. Cooke CE, Lee HY, Xing S. Adherence to antiretroviral therapy in managed care members in the United States: a retrospective claims analysis. *Journal of*
- 19 *managed care pharmacy : JMCP* 2014;**20**:86-92
- 20 65. Pruitt Z, Robst J, Langland-Orban B, et al. Healthcare costs associated with antiretroviral adherence among medicaid patients. *Applied health economics*
- 21 *and health policy* 2015;**13**:69-80 doi: 10.1007/s40258-014-0138-1[published Online First: Epub Date] |.
- 22 66. Davis KL, Edin HM, Allen JK. Prevalence and cost of medication nonadherence in Parkinson's disease: evidence from administrative claims data.
- 23 *Movement disorders : official journal of the Movement Disorder Society* 2010;**25**(4):474-80 doi: 10.1002/mds.22999[published Online First: Epub
- 24 *Date*] |.
- 25 67. Delea TE, Thomas SK, Hagiwara M. The association between adherence to levodopa/carbidopa/entacapone therapy and healthcare utilization and costs
- 26 *among patients with Parkinson's disease: a retrospective claims-based analysis*. *CNS drugs* 2011;**25**:53-66 doi: 10.2165/11538970-000000000-
- 27 00000[published Online First: Epub Date] |.
- 28 68. Wei Y-J, Palumbo FB, Simoni-Wastila L, et al. Antiparkinson drug adherence and its association with health care utilization and economic outcomes in a
- 29 *Medicare Part D population*. *Value in health : the journal of the International Society for Pharmacoeconomics and Outcomes Research* 2014;**17**:196-
- 30 204 doi: 10.1016/j.jval.2013.12.003[published Online First: Epub Date] |.
- 31 69. Ivanova JI, Bergman RE, Birnbaum HG, et al. Impact of medication adherence to disease-modifying drugs on severe relapse, and direct and indirect costs
- 32 *among employees with multiple sclerosis in the US*. *Journal of medical economics* 2012;**15**:601-9 doi: 10.3111/13696998.2012.667027[published
- 33 *Online First: Epub Date*] |.
- 34 70. Tan H, Cai Q, Agarwal S, et al. Impact of adherence to disease-modifying therapies on clinical and economic outcomes among patients with multiple
- 35 *sclerosis*. *Advances in therapy* 2011;**28**:51-61 doi: 10.1007/s12325-010-0093-7[published Online First: Epub Date] |.
- 36
- 37
- 38
- 39
- 40
- 41
- 42
- 43
- 44
- 45
- 46
- 47



- 1  
2  
3  
4  
5  
6  
7  
8  
9  
10  
11  
12  
13  
14  
15  
16  
17  
18  
19  
20  
21  
22  
23  
24  
25  
26  
27  
28  
29  
30  
31  
32  
33  
34  
35  
36  
37  
38  
39  
40  
41  
42  
43  
44  
45  
46  
47
71. Zhao Y, Chen S-Y, Wu N, et al. Medication Adherence and Healthcare Costs among Fibromyalgia Patients Treated with Duloxetine. *Pain Practice* 2011;**11**:381-91 doi: 10.1111/j.1533-2500.2010.00431.x[published Online First: Epub Date]].
72. Darkow T, Henk HJ, Thomas SK, et al. Treatment interruptions and non-adherence with imatinib and associated healthcare costs: a retrospective analysis among managed care patients with chronic myelogenous leukaemia. *PharmacoEconomics* 2007;**25**:481-96
73. Wu EQ, Johnson S, Beaulieu N, et al. Healthcare resource utilization and costs associated with non-adherence to imatinib treatment in chronic myeloid leukemia patients. *Current medical research and opinion* 2010;**26**:61-69 doi: 10.1185/03007990903396469[published Online First: Epub Date]].
74. Leider HL, Dhaliwal J, Davis EJ, et al. Healthcare costs and nonadherence among chronic opioid users. *The American journal of managed care* 2011;**17**:32-40
75. Ruetsch C, Tkacz J, Nadipelli VR, et al. Heterogeneity of nonadherent buprenorphine patients: subgroup characteristics and outcomes. *The American journal of managed care* 2017;**23**(6):e172-e79
76. Tkacz J, Volpicelli J, Un H, et al. Relationship between buprenorphine adherence and health service utilization and costs among opioid dependent patients. *Journal of substance abuse treatment* 2014;**46**:456-62 doi: 10.1016/j.jsat.2013.10.014[published Online First: Epub Date]].
77. Lee A, Song X, Khan I, et al. Association of cinacalcet adherence and costs in patients on dialysis. *Journal of medical economics* 2011;**14**:798-804 doi: 10.3111/13696998.2011.627404[published Online First: Epub Date]].
78. Candrilli SD, O'Brien SH, Ware RE, et al. Hydroxyurea adherence and associated outcomes among Medicaid enrollees with sickle cell disease. *American journal of hematology* 2011;**86**:273-7 doi: 10.1002/ajh.21968[published Online First: Epub Date]].
79. Alvarez Payero M, Martinez Lopez de Castro N, Ucha Samartin M, et al. Medication non-adherence as a cause of hospital admissions. *Farmacia hospitalaria : organo oficial de expresion cientifica de la Sociedad Espanola de Farmacia Hospitalaria* 2014;**38**(4):328-33 doi: 10.7399/fh.2014.38.4.7660[published Online First: Epub Date]].

eTable 3: Total cost or total healthcare cost comparison across disease groups

| Disease State                                     | Min adj cost per annum per person | Max adj cost per annum per person | Median adj cost per annum per person | Mean adj cost per annum per person | No. adj studies | Min unadj cost per annum per person | Max unadj cost per annum per person | Median unadj cost per annum per person | Mean unadj cost per annum per person | No. unadj studies | Total studies <sup>1</sup> |
|---------------------------------------------------|-----------------------------------|-----------------------------------|--------------------------------------|------------------------------------|-----------------|-------------------------------------|-------------------------------------|----------------------------------------|--------------------------------------|-------------------|----------------------------|
| Cardiovascular Disease                            | 3347                              | 19472                             | 8080                                 | 9204                               | 6               | 1433                                | 8377.05                             | 5951                                   | 4701                                 | 7                 | 12                         |
| Mental Health                                     | 3253                              | 19363                             | 11262                                | 11052                              | 6               | 2512                                | 25920                               | 17211                                  | 16486                                | 7                 | 14                         |
| Diabetes Mellitus                                 | 2741                              | 9819                              | 6907                                 | 6310                               | 7               | 1142                                | 7950                                | 5534                                   | 4934                                 | 8                 | 11                         |
| Osteoporosis                                      | 949                               | 44190                             | 41402                                | 32866                              | 4               | 669                                 | 43404                               | 9921                                   | 18190                                | 10                | 11                         |
| Respiratory Disease                               | 5701                              | 7124                              | 6689                                 | 6505                               | 1               | 804                                 | 36259                               | 11546                                  | 16124                                | 5                 | 6                          |
| Gastrointestinal Disease                          | 12085                             | 37151                             | 20715                                | 23317                              | 3               |                                     |                                     |                                        |                                      | 2                 | 5                          |
| Epilepsy                                          |                                   |                                   |                                      |                                    | 0               | 1866                                | 22673                               | 18714                                  | 14418                                | 3                 | 3                          |
| HIV/AIDS                                          |                                   |                                   |                                      |                                    | 0               | 16957                               | 30523                               | 23880                                  | 24322                                | 3                 | 3                          |
| Parkinson's Disease                               |                                   |                                   |                                      | 10290*                             | 1               | 10988                               | 52023                               | 36753                                  | 34129                                | 3                 | 3                          |
| Musculoskeletal conditions                        |                                   |                                   |                                      | 25368*                             | 2               |                                     |                                     |                                        | 3408.32*                             | 2                 | 3                          |
| Cancer                                            |                                   |                                   |                                      |                                    | 0               | 48598                               | 162699                              | 93627                                  | 99638                                | 2                 | 2                          |
| Addiction                                         |                                   |                                   |                                      | 53504*                             | 1               | 16996                               | 52213                               | 29406                                  | 32872                                | 3                 | 3                          |
| Metabolic conditions other than diabetes mellitus |                                   |                                   |                                      |                                    | 0               |                                     |                                     |                                        | 138525*                              | 1                 | 1                          |
| Blood conditions                                  |                                   |                                   |                                      | 13458*                             | 1               |                                     |                                     |                                        |                                      | 0                 | 1                          |
| All causes                                        | 5271                              | 52341                             | 17132                                | 21257                              | 14              | 1037                                | 53793                               | 16308                                  | 19352                                | 10                | 30**                       |

Costs reported in \$US2015 dollars

<sup>1</sup>Some studies included both adjusted and unadjusted costs

\*Single total cost/total healthcare cost reported

\*\* In addition to disease-specific studies of the economic impact of medication nonadherence, studies reported the all-causes costs, encompassing cost drivers such as comorbidities. Alvarez Payero et al reported all cause costs only.

Do not report total cost/total healthcare cost

Single total cost/total healthcare cost reported



# PRISMA 2009 Checklist

| Section/topic                      | #  | Checklist item                                                                                                                                                                                                                                                                                              | Reported on page # |
|------------------------------------|----|-------------------------------------------------------------------------------------------------------------------------------------------------------------------------------------------------------------------------------------------------------------------------------------------------------------|--------------------|
| <b>TITLE</b>                       |    |                                                                                                                                                                                                                                                                                                             |                    |
| Title                              | 1  | Identify the report as a systematic review, meta-analysis, or both.                                                                                                                                                                                                                                         |                    |
| <b>ABSTRACT</b>                    |    |                                                                                                                                                                                                                                                                                                             |                    |
| Structured summary                 | 2  | Provide a structured summary including, as applicable: background; objectives; data sources; study eligibility criteria, participants, and interventions; study appraisal and synthesis methods; results; limitations; conclusions and implications of key findings; systematic review registration number. |                    |
| <b>INTRODUCTION</b>                |    |                                                                                                                                                                                                                                                                                                             |                    |
| Rationale                          | 3  | Describe the rationale for the review in the context of what is already known.                                                                                                                                                                                                                              |                    |
| Objectives                         | 4  | Provide an explicit statement of questions being addressed with reference to participants, interventions, comparisons, outcomes, and study design (PICOS).                                                                                                                                                  |                    |
| <b>METHODS</b>                     |    |                                                                                                                                                                                                                                                                                                             |                    |
| Protocol and registration          | 5  | Indicate if a review protocol exists, if and where it can be accessed (e.g., Web address), and, if available, provide registration information including registration number.                                                                                                                               |                    |
| Eligibility criteria               | 6  | Specify study characteristics (e.g., PICOS, length of follow-up) and report characteristics (e.g., years considered, language, publication status) used as criteria for eligibility, giving rationale.                                                                                                      |                    |
| Information sources                | 7  | Describe all information sources (e.g., databases with dates of coverage, contact with study authors to identify additional studies) in the search and date last searched.                                                                                                                                  |                    |
| Search                             | 8  | Present full electronic search strategy for at least one database, including any limits used, such that it could be repeated.                                                                                                                                                                               |                    |
| Study selection                    | 9  | State the process for selecting studies (i.e., screening, eligibility, included in systematic review, and, if applicable, included in the meta-analysis).                                                                                                                                                   |                    |
| Data collection process            | 10 | Describe method of data extraction from reports (e.g., piloted forms, independently, in duplicate) and any processes for obtaining and confirming data from investigators.                                                                                                                                  |                    |
| Data items                         | 11 | List and define all variables for which data were sought (e.g., PICOS, funding sources) and any assumptions and simplifications made.                                                                                                                                                                       |                    |
| Risk of bias in individual studies | 12 | Describe methods used for assessing risk of bias of individual studies (including specification of whether this was done at the study or outcome level), and how this information is to be used in any data synthesis.                                                                                      |                    |
| Summary measures                   | 13 | State the principal summary measures (e.g., risk ratio, difference in means).                                                                                                                                                                                                                               |                    |
| Synthesis of results               | 14 | Describe the methods of handling data and combining results of studies, if done, including measures of consistency (e.g., $I^2$ ) for each meta-analysis.                                                                                                                                                   |                    |

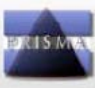

# PRISMA 2009 Checklist

1  
2  
3  
4  
5  
6  
7  
8  
9  
10  
11  
12  
13  
14  
15  
16  
17  
18  
19  
20  
21  
22  
23  
24  
25  
26  
27  
28  
29  
30  
31  
32  
33  
34  
35  
36  
37  
38  
39  
40  
41  
42  
43  
44  
45  
46  
47  
48  
49

| Section/topic                 | #  | Checklist item                                                                                                                                                                                           | Reported on page # |
|-------------------------------|----|----------------------------------------------------------------------------------------------------------------------------------------------------------------------------------------------------------|--------------------|
| Risk of bias across studies   | 15 | Specify any assessment of risk of bias that may affect the cumulative evidence (e.g., publication bias, selective reporting within studies).                                                             |                    |
| Additional analyses           | 16 | Describe methods of additional analyses (e.g., sensitivity or subgroup analyses, meta-regression), if done, indicating which were pre-specified.                                                         |                    |
| <b>RESULTS</b>                |    |                                                                                                                                                                                                          |                    |
| Study selection               | 17 | Give numbers of studies screened, assessed for eligibility, and included in the review, with reasons for exclusions at each stage, ideally with a flow diagram.                                          |                    |
| Study characteristics         | 18 | For each study, present characteristics for which data were extracted (e.g., study size, PICOS, follow-up period) and provide the citations.                                                             |                    |
| Risk of bias within studies   | 19 | Present data on risk of bias of each study and, if available, any outcome level assessment (see item 12).                                                                                                |                    |
| Results of individual studies | 20 | For all outcomes considered (benefits or harms), present, for each study: (a) simple summary data for each intervention group (b) effect estimates and confidence intervals, ideally with a forest plot. |                    |
| Synthesis of results          | 21 | Present results of each meta-analysis done, including confidence intervals and measures of consistency.                                                                                                  |                    |
| Risk of bias across studies   | 22 | Present results of any assessment of risk of bias across studies (see Item 15).                                                                                                                          |                    |
| Additional analysis           | 23 | Give results of additional analyses, if done (e.g., sensitivity or subgroup analyses, meta-regression [see Item 16]).                                                                                    |                    |
| <b>DISCUSSION</b>             |    |                                                                                                                                                                                                          |                    |
| Summary of evidence           | 24 | Summarize the main findings including the strength of evidence for each main outcome; consider their relevance to key groups (e.g., healthcare providers, users, and policy makers).                     |                    |
| Limitations                   | 25 | Discuss limitations at study and outcome level (e.g., risk of bias), and at review-level (e.g., incomplete retrieval of identified research, reporting bias).                                            |                    |
| Conclusions                   | 26 | Provide a general interpretation of the results in the context of other evidence, and implications for future research.                                                                                  |                    |
| <b>FUNDING</b>                |    |                                                                                                                                                                                                          |                    |
| Funding                       | 27 | Describe sources of funding for the systematic review and other support (e.g., supply of data); role of funders for the systematic review.                                                               |                    |

From: Moher D, Liberati A, Tetzlaff J, Altman DG, The PRISMA Group (2009). Preferred Reporting Items for Systematic Reviews and Meta-Analyses: The PRISMA Statement. PLoS Med 6(7): e1000097. doi:10.1371/journal.pmed1000097

For more information, visit: [www.prisma-statement.org](http://www.prisma-statement.org).
