# Supplementary material for: Economic impact of medication non-adherence by disease groups: a systematic review
Source: PubMed Central journal article supplement — BMJ Open. 2018 Jan 21;8(1):e016982. doi: 10.1136/bmjopen-2017-016982 (PMC5780689; doi:10.1136/bmjopen-2017-016982), 2018-01-21
Supplement: bmjopen-2017-016982supp001.pdf [file bmjopen-2017-016982supp001.pdf]

**eTable 1 Search Strategy<sup>1</sup>**

| <b>Database</b> | <b>Search Strategy</b>                                                                                                                                                                              |
|-----------------|-----------------------------------------------------------------------------------------------------------------------------------------------------------------------------------------------------|
| PubMed          | ((costs[TIAB] OR "Costs and Cost Analysis"[MH] OR burden[TIAB]) AND (nonadherence[TIAB] OR ("Patient Compliance"[MH] AND ("Drug Therapy"[MH] OR medication[TIAB]))) OR "Medication adherence"[MH])) |
| Scopus          | ( TITLE-ABS-KEY ( medication AND compliance OR patient AND compliance ) ) AND ( TITLE-ABS-KEY ( statistical AND model ) ) AND ( TITLE-ABS-KEY ( health AND care AND cost ) )                        |

---

<sup>1</sup> In accordance with the Cochrane Handbook for Systematic Reviews no date restriction filters were used.
