# Supplementary material for: Economic impact of medication non-adherence by disease groups: a systematic review
Source: PubMed Central journal article supplement — BMJ Open. 2018 Jan 21;8(1):e016982. doi: 10.1136/bmjopen-2017-016982 (PMC5780689; doi:10.1136/bmjopen-2017-016982), 2018-01-21
Supplement: bmjopen-2017-016982supp002.pdf [file bmjopen-2017-016982supp002.pdf]

eTable 2: Studies identified with costs reported by adherence level and disease group

| Author, Year, Country                                | Objective                                                                                                                                                                             | Study Characteristics                                                                                                                                       | Adherence (as reported in paper)                                                                                                                      | Outcomes/ Indicators                                                                  | Results (USD, 2015)                                                                                                                                                                                                                                                              | Quality                                                           |
|------------------------------------------------------|---------------------------------------------------------------------------------------------------------------------------------------------------------------------------------------|-------------------------------------------------------------------------------------------------------------------------------------------------------------|-------------------------------------------------------------------------------------------------------------------------------------------------------|---------------------------------------------------------------------------------------|----------------------------------------------------------------------------------------------------------------------------------------------------------------------------------------------------------------------------------------------------------------------------------|-------------------------------------------------------------------|
| <b>Cardiovascular Disease</b>                        |                                                                                                                                                                                       |                                                                                                                                                             |                                                                                                                                                       |                                                                                       |                                                                                                                                                                                                                                                                                  |                                                                   |
| <i>Aubert et al</i> [1]<br>2010<br>US                | To investigate whether compliance during the first 2 years of statin therapy is associated with reduced hospitalization rates and direct medical costs during year 3.                 | <u>Design:</u> Retrospective cohort study<br><u>Follow Up:</u> 3 years<br><u>Sample Size:</u> 10227 (A:3512, NA:6715)                                       | <u>Measure:</u> MPR<br><u>Classification:</u> MPR < 80 = non-compliant<br><u>Method of Assessment:</u> pharmacy claims data                           | Total Healthcare costs<br>Medical Costs                                               | <u>Type of Costs:</u> adjusted<br><u>Classification:</u> disease state specific<br><u>Currency Year:</u> USD, 2002<br><u>Cost of Nonadherence:</u> THC:\$5289.61 (\$6865.90), MC:\$4908.09 (\$6370.60)                                                                           | <u>Quality:</u> medium<br><u>Classification:</u> cost description |
| <i>Casciano et al</i> [2]<br>2013<br>US              | To assess the economic burden of underuse and nonadherence of warfarin therapy among patients with non-valvular atrial fibrillation in a commercially insured population.             | <u>Design:</u> Retrospective, observational, quasi-experimental study<br><u>Follow Up:</u> 18months<br><u>Sample Size:</u> 13289 (A:2852, NA:4184, NE:6253) | <u>Measure:</u> PDC<br><u>Classification:</u> PDC <80 = low adherence , 0 = no warfarin exposure<br><u>Method of Assessment:</u> pharmacy claims data | Total Costs<br>Inpatient Costs<br>Outpatient Costs<br>Pharmacy Costs<br>Medical Costs | <u>Type of Costs:</u> adjusted<br><u>Classification:</u> all cause<br><u>Currency Year:</u> USD, 2005<br><u>Cost of Nonadherence</u> * :<br>TC:\$16612.44(\$19936.70), IC:\$9382.56 (\$11260.10), OC:\$8605.92 (\$10328),<br>PC:\$2388.24 (\$2866.20),<br>MC:\$15235.80(\$18285) | <u>Quality:</u> medium<br><u>Classification:</u> cost description |
| <i>Dilokthornsakul et al</i> [3]<br>2012<br>Thailand | To determine the effects of medication supplies on healthcare costs and hospitalizations in patients with chronic heart failure receiving angiotensin converting enzyme inhibitors or | <u>Design:</u> Retrospective cohort study<br><u>Follow Up:</u> 1 year<br><u>Sample Size:</u> 393 (A:168, NA:219, OA:6)                                      | <u>Measure:</u> MPR<br><u>Classification:</u> MPR < 80 = undersupply, MPR >120 = oversupply<br><u>Method of Assessment:</u> pharmacy claims data      | Total Healthcare Costs<br>Inpatient Costs<br>Outpatient Costs                         | <u>Type of Costs:</u> unadjusted<br><u>Classification:</u> disease state specific<br><u>Currency Year:</u> USD, 2004<br><u>Cost of Nonadherence:</u><br>THC:\$1157 (\$1433.06),<br>IC:\$1019 (\$1262.13),<br>OC:\$138 (\$170.93)                                                 | <u>Quality:</u> high<br><u>Classification:</u> cost description   |

|                                                     |                                                                                                                                                                    |                                                                                                                                  |                                                                                                                                                          |                                                                                              |                                                                                                                                                                                                                                                                                                                                                                                                                                                                                                                                                                                                          |                                                                           |
|-----------------------------------------------------|--------------------------------------------------------------------------------------------------------------------------------------------------------------------|----------------------------------------------------------------------------------------------------------------------------------|----------------------------------------------------------------------------------------------------------------------------------------------------------|----------------------------------------------------------------------------------------------|----------------------------------------------------------------------------------------------------------------------------------------------------------------------------------------------------------------------------------------------------------------------------------------------------------------------------------------------------------------------------------------------------------------------------------------------------------------------------------------------------------------------------------------------------------------------------------------------------------|---------------------------------------------------------------------------|
| <p><i>Dragomir et al</i>[4]<br/>2010<br/>Canada</p> | <p>angiotensin receptor blockers.<br/>To evaluate the impact of low adherence to antihypertensive agents on cardiovascular outcomes and hospitalization costs.</p> | <p><u>Design:</u> Retrospective cohort study<br/><u>Follow Up:</u> 3 years<br/><u>Sample Size:</u> 56896 (A:38217, NA:18679)</p> | <p><u>Measure:</u> MPR<br/><u>Classification:</u> MPR≥80 = adherent, MPR &lt; 80 = nonadherent<br/><u>Method of Assessment:</u> pharmacy claims data</p> | <p>Total Healthcare Costs<br/>Pharmacy Costs<br/>Medical Costs<br/>Hospitalization Costs</p> | <p><u>Type of Costs:</u> unadjusted and predicted<br/><u>Classification:</u> disease state specific and hospitalized patients<br/><u>Currency Year:</u> CAD, 2006<br/><u>Cost of Nonadherence:</u> Unadjusted Disease state specific: THC:\$7165 (\$6900.87), PC: \$1800 (\$1733.64), MC: \$1370 (\$1319.50), HC: \$3995 (\$3847.73)<br/>Unadjusted Hospitalized patients: THC: \$17397 (\$16755.67), PC:\$2685 (\$2586.02), MC:\$2608 (\$2511.86), HC: \$12104 (\$11657.79)<br/>Predicted disease state specific: HC:\$3877 (\$3734.08)<br/>Predicted hospitalized patient: HC:\$11715 (\$11283.13)</p> | <p><u>Quality:</u> medium<br/><u>Classification:</u> cost description</p> |
| <p><i>Dragomir et al</i>[5]<br/>2010<br/>Canada</p> | <p>To evaluate the impact of low adherence to statins on clinical issues and direct healthcare costs.</p>                                                          | <p><u>Design:</u> Retrospective cohort study<br/><u>Follow Up:</u> 3 years<br/><u>Sample Size:</u> 55134 (A:28549, NA:26585)</p> | <p><u>Measure:</u> MPR<br/><u>Classification:</u> MPR≥80 = adherent, MPR &lt; 80 = nonadherent<br/><u>Method of Assessment:</u> pharmacy claims data</p> | <p>Total Healthcare Costs<br/>Pharmacy Costs<br/>Medical Costs<br/>Hospitalization Costs</p> | <p><u>Type of Costs:</u> unadjusted and predicted<br/><u>Classification:</u> disease state specific and hospitalized patients<br/><u>Currency Year:</u> CAD, 2005<br/><u>Cost of Nonadherence:</u> Unadjusted Disease state specific: THC:\$6243 (\$6175.76), PC:\$2506 (\$2479.01), MC:\$1241 (\$1227.63), HC:\$2496 (\$2469.12)<br/>Unadjusted Hospitalized patients: THC:\$14725 (\$14566.40), PC:\$3374 (\$3337.66), MC:\$2475 (\$2448.34), HC:\$8876 (\$8780.40)<br/>Predicted disease state specific:</p>                                                                                          | <p><u>Quality:</u> medium<br/><u>Classification:</u> cost description</p> |

|                                                |                                                                                                                                                        |                                                                                                                                                |                                                                                                                                                                                                            |                                                                                                        |                                                                                                                                                                                                                                                                                                                                                                                                                                                                                                                                                                                                                                                                                                                                                                                                                                                                                    |                                                                           |
|------------------------------------------------|--------------------------------------------------------------------------------------------------------------------------------------------------------|------------------------------------------------------------------------------------------------------------------------------------------------|------------------------------------------------------------------------------------------------------------------------------------------------------------------------------------------------------------|--------------------------------------------------------------------------------------------------------|------------------------------------------------------------------------------------------------------------------------------------------------------------------------------------------------------------------------------------------------------------------------------------------------------------------------------------------------------------------------------------------------------------------------------------------------------------------------------------------------------------------------------------------------------------------------------------------------------------------------------------------------------------------------------------------------------------------------------------------------------------------------------------------------------------------------------------------------------------------------------------|---------------------------------------------------------------------------|
| <p><i>Pittman et al</i>[6]<br/>2011<br/>US</p> | <p>To examine the relation among statin adherence, subsequent hospitalizations and healthcare costs.</p>                                               | <p><u>Design:</u> Retrospective cohort study<br/><u>Follow Up:</u> 18 months<br/><u>Sample Size:</u> 381422 (A:258013, MA:65795, LA:57614)</p> | <p><u>Measure:</u> MPR<br/><u>Classification:</u><br/>MPR ≥ 80 = adherent, MPR &gt;60&lt;79% = moderate adherence, MPR &lt;59 =low adherence<br/><u>Method of Assessment:</u><br/>pharmacy claims data</p> | <p>Total Healthcare Costs<br/>Pharmacy Costs<br/>Medical Costs</p>                                     | <p>HC:\$2669 (\$2640.25)<br/>Predicted hospitalized patient: HC\$9214 (\$9114.76)<br/><u>Type of Costs:</u> adjusted<br/><u>Classification:</u> all cause and disease state specific<br/><u>Currency Year:</u> USD, 2009<br/><u>Cost of Nonadherence*:</u> all cause:<br/>THC(&gt;80):\$6798.67 (\$7505.66),<br/>THC(60-79):\$7072.67 (\$7808.16),<br/>THC(&lt;59):\$7401.33 (\$8170.99),<br/>PC(&gt;80):\$1767.33 (\$1951.11),<br/>PC(60-79):\$1789.33 (\$1975.40),<br/>PC(&lt;59):\$1937.33 (\$2138.79),<br/>MC(&gt;80):\$4472.67 (\$4937.78),<br/>MC(60-79):\$4840.67 (\$5344.05),<br/>MC(&lt;59):\$5138.67 (\$5673.04)<br/>Disease state specific:<br/>PC(&gt;80):\$558.67 (\$616.77),<br/>PC(60-79):\$442.67 (\$488.70),<br/>PC(&lt;59):\$325.33 (\$359.16),<br/>MC(&gt;80):\$1596.67 (\$1762.71),<br/>MC(60-79):\$1722 (\$1901.07),<br/>MC(&lt;59):\$1792.67 (\$1979.09)</p> | <p><u>Quality:</u> medium<br/><u>Classification:</u> cost description</p> |
| <p><i>Pittman et al</i>[7]<br/>2010<br/>US</p> | <p>To evaluate the relationship between adherence to antihypertensive medications and subsequent hospitalizations, emergency department visits and</p> | <p><u>Design:</u> Retrospective cohort study<br/><u>Follow Up:</u> 2 years<br/><u>Sample Size:</u> 625620(A:467006, MA:96226, LA:62388)</p>    | <p><u>Measure:</u> MPR<br/><u>Classification:</u><br/>MPR ≥ 80 = adherent, MPR &gt;60&lt;79% = moderate adherence, MPR &lt;59 =low adherence</p>                                                           | <p>Total Healthcare Costs<br/>Outpatient Costs<br/>ED Costs<br/>Pharmacy Costs<br/>Hospitalization</p> | <p><u>Type of Costs:</u> adjusted and unadjusted<br/><u>Classification:</u> disease state specific<br/><u>Currency Year:</u> USD, 2008<br/><u>Cost of Nonadherence:</u> Adjusted:<br/>THC(&gt;80):\$7261 (\$8077.79),<br/>THC(60-79):\$7530 (\$8377.05),<br/>THC(&lt;59):\$7370 (\$8199.05),<br/>OC(&gt;80):\$3390 (\$3771.34),<br/>OC(60-79):\$3705 (\$4121.77),</p>                                                                                                                                                                                                                                                                                                                                                                                                                                                                                                              | <p><u>Quality:</u> medium<br/><u>Classification:</u> cost description</p> |

|                              |                                                                                                                     |                                                                                                                                      |                                                                                                                                       |                        |                                                                                                                                                                                                                                                                                                                                                                                                                                                                                                                                                                                                                                                                                                                                                                                                                               |                                                                |
|------------------------------|---------------------------------------------------------------------------------------------------------------------|--------------------------------------------------------------------------------------------------------------------------------------|---------------------------------------------------------------------------------------------------------------------------------------|------------------------|-------------------------------------------------------------------------------------------------------------------------------------------------------------------------------------------------------------------------------------------------------------------------------------------------------------------------------------------------------------------------------------------------------------------------------------------------------------------------------------------------------------------------------------------------------------------------------------------------------------------------------------------------------------------------------------------------------------------------------------------------------------------------------------------------------------------------------|----------------------------------------------------------------|
|                              | costs of care.                                                                                                      |                                                                                                                                      | <u>Method of Assessment:</u><br>pharmacy claims data                                                                                  | Costs                  | OC(<59):\$3776 (\$4200.76),<br>EDC(>80):\$101 (\$112.36),<br>EDC(60-79):\$134 (\$149.07),<br>EDC(<59):\$172 (\$191.35),<br>PC(>80):\$2383 (\$2651.06),<br>PC(60-79):\$1932 (\$2149.33),<br>PC(<59):\$1509 (\$1678.75),<br>HC(>80):\$1386 (\$1541.91),<br>HC(60-79):\$1759 (\$1956.87),<br>HC(<59):\$1913 (\$2128.19)<br>Unadjusted:<br>THC(>80):\$7182 (\$7989.90),<br>THC(60-79):\$7560 (\$8410.42),<br>THC(<59):\$7995 (\$8894.35),<br>OC(>80):\$3396 (\$3778.01),<br>OC(60-79):\$3635 (\$4043.90),<br>OC(<59):\$3887 (\$4324.25),<br>EDC(>80):\$102 (\$113.47),<br>EDC(60-79):\$131 (\$145.74),<br>EDC(<59):\$172 (\$191.35),<br>PC(>80):\$2317 (\$2577.64),<br>PC(60-79):\$2034 (\$2262.80),<br>PC(<59):\$1880 (\$2091.48),<br>HC(>80):\$1366 (\$1519.66),<br>HC(60-79):\$1759 (\$1956.87),<br>HC(<59):\$2057 (\$2288.39) |                                                                |
| Rizzo et al[8]<br>1997<br>US | To investigate variations in compliance with four classes of antihypertensive agents- diuretics, ACEIs, CCBs and β- | <u>Design:</u> Retrospective cohort study<br><u>Follow Up:</u> 12 months<br><u>Sample Size:</u> 7211(P:2668, NC:3101, NP:649, T:793) | <u>Measure:</u> ordinary least square regression analysis<br><u>Classification:</u> >80% = persistent, ≥30<80% = non-compliance, <30% | Total Healthcare Costs | <u>Type of Costs:</u> unadjusted<br><u>Classification:</u> all cause and disease state specific<br><u>Currency Year:</u> USD, 1994<br><u>Cost of Nonadherence:</u> All cause:<br>THC(>80):\$341 (\$509.66),<br>THC(30-80):\$694 (\$1037.26),                                                                                                                                                                                                                                                                                                                                                                                                                                                                                                                                                                                  | <u>Quality:</u> low<br><u>Classification:</u> cost description |

blockers and the health care costs associated with various degrees of compliance.

= non-persistence  
Method of Assessment:  
 pharmacy claims data

THC(<30):\$735 (\$1098.53)  
 Disease state specific:  
 Renal:  
 THC(>80):\$2135 (\$3190.98),  
 THC(30-80):\$2488 (\$3718.58),  
 THC(<30):\$2529 (\$3779.86),  
 Acute MI:  
 THC(>80):\$1358 (\$2029.67),  
 THC(30-80):\$1711 (\$2557.27),  
 THC(<30):\$1752 (\$2618.55), Diabetes:  
 THC(>80):\$770 (\$1150.85),  
 THC(30-80):\$1123 (\$1678.44),  
 THC(<30):\$1164 (\$1739.72),  
 CHF:  
 THC(>80):\$698 (\$1043.23),  
 THC(30-80):\$1051 (\$1570.83),  
 THC(<30):\$1092 (\$1632.11),  
 Angina:  
 THC(>80):\$702 (\$1049.21),  
 THC(30-80):\$1055 (\$1576.81),  
 THC(<30):\$1096 (\$1638.09)

Sokol et al[9]  
 2005  
 US

To evaluate the impact of medication adherence on healthcare utilisation and cost for 4 chronic conditions that are major drivers of drug spending: diabetes, hypertension, hypercholesterolemia, and congestive heart failure.

Design: Retrospective cohort observational study  
Follow Up: 12 months  
Sample Size: 137277  
 Diabetes:(≥80: 1801, 60-79: 599, 40-59: 419, 20-39: 259, <19: 182)  
 Hypertension:(≥80: 5804, 60-79: 921, 40-59: 562, 20-39: 344, <19: 350)

Measure:  
 medication supply  
Classification: 1-19%, 20-39%, 40-59%, 60-79%, 80-100%  
Method of Assessment:  
 pharmacy claims data

Total Costs  
 Pharmacy Costs  
 Medical Costs

Type of Costs: adjusted  
Classification: all cause and disease state specific  
Currency Year: USD, 1998  
Cost of Nonadherence: All cause:  
 Diabetes:  
 TC(1-19):\$16498 (\$23071.58),  
 TC(20-39):\$13077 (\$18287.49),  
 TC(40-59):\$12978 (\$18149.05),  
 TC(60-79):\$11484 (\$16059.77),  
 TC(80-100):\$8886 (\$12426.60),  
 PC(1-19):\$1312 (\$1834.76),

Quality: medium  
Classification: cost description

Hypercholesterolemia:  
(≥80: 1754, 60-79: 520,  
40-59: 324, 20-39: 216,  
<19: 167)  
CHF: (≥80: 518, 60-79:  
107, 40-59: 82, 20-39:  
70, <19: 86)

PC(20-39):\$1877 (\$2624.89),  
PC(40-59):\$1970 (\$2754.94),  
PC(60-79):\$2121 (\$2966.11),  
PC(80-100):\$2510 (\$3510.10),  
MC(1-19):\$15186 (\$21236.82),  
MC(20-39):\$11200 (\$15662.61),  
MC(40-59):\$11008 (\$15394.10),  
MC(60-79):\$9363 (\$13093.66),  
MC(80-100):\$6377 (\$8917.90),  
Hypertension:  
TC(1-19):\$9747 (\$13630.66),  
TC(20-39):\$11238 (\$15715.75),  
TC(40-59):\$9491 (\$13272.66),  
TC(60-79):\$8929 (\$12486.73),  
TC(80-100):\$8386 (\$11272.38),  
PC(1-19):\$916 (\$1280.98),  
PC(20-39):\$952 (\$1331.32),  
PC(40-59):\$1123 (\$1570.46),  
PC(60-79):\$1271 (\$1777.43),  
PC(80-100):\$1817 (\$2540.98),  
MC(1-19):\$8831 (\$12349.69),  
MC(20-39):\$10286 (\$14384.43),  
MC(40-59):\$8368 (\$11702.20),  
MC(60-79):\$7658 (\$10709.31),  
MC(80-100):\$6570 (\$9187.80),  
Hypercholesterolemia:  
TC(1-19):\$10916 (\$15265.45),  
TC(20-39):\$7982 (\$11162.40),  
TC(40-59):\$6756 (\$9447.91),  
TC(60-79):\$8412 (\$11763.74),  
TC(80-100):\$6752 (\$9442.31),  
PC(1-19):\$1067 (\$1492.14),  
PC(20-39):\$1152 (\$1611.01),

PC(40-59):\$1247 (\$1743.86),  
PC(60-79):\$1736 (\$2427.70),  
PC(80-100):\$1972 (\$2757.74),  
MC(1-19):\$9849(\$13773.30),  
MC(20-39):\$6830 (\$9551.39),  
MC(40-59):\$5509 (\$7704.04),  
MC(60-79):\$6676 (\$9336.03),  
MC(80-100):\$4780 (\$6684.58),  
CHF:  
TC(1-19):\$23964 (\$33512.38),  
TC(20-39):\$19188 (\$26833.40),  
TC(40-59):\$26311 (\$36794.54),  
TC(60-79):\$29785 (\$41652.74),  
TC(80-100):\$22164 (\$30995.18),  
PC(1-19):\$1961 (\$2742.35),  
PC(20-39):\$2055 (\$2873.81),  
PC(40-59):\$2208 (\$3087.77),  
PC(60-79):\$3412 (\$4771.50),  
PC(80-100):\$3107 (\$4344.97),  
MC(1-19):\$22003 (\$30770.03),  
MC(20-39):\$17133 (\$23959.59),  
MC(40-59):\$24103 (\$33706.77),  
MC(60-79):\$26373 (\$36881.24),  
MC(80-100):\$19056 (\$26648.81)  
Disease state specific: Diabetes:  
TC(1-19):\$8867 (\$12400.03),  
TC(20-39):\$7124 (\$9916.90),  
TC(40-59):\$6522 (\$9120.67),  
TC(60-79):\$6291 (\$8797.63),  
TC(80-100):\$4570 (\$6390.90),  
PC(1-19):\$55 (\$76.91),  
PC(20-39):\$165 (\$230.74),  
PC(40-59):\$285 (\$398.56),

PC(60-79):\$404 (\$564.97),  
PC(80-100):\$763 (\$1067.02),  
MC(1-19):\$8812 (\$12323.11),  
MC(20-39):\$6959 (\$9731.79),  
MC(40-59):\$6237 (\$8722.11),  
MC(60-79):\$5887 (\$8232.66),  
MC(80-100):\$3808 (\$5325.29),  
Hypertension:  
TC(1-19):\$4878 (\$6821.62),  
TC(20-39):\$6062 (\$8477.39),  
TC(40-59):\$5297 (\$7407.57),  
TC(60-79):\$5262 (\$7358.63),  
TC(80-100):\$4871 (\$6811.84),  
PC(1-19):\$31 (\$43.35),  
PC(20-39):\$89(\$124.46),  
PC(40-59):\$184 (\$257.31),  
PC(60-79):\$285 (\$398.56),  
PC(80-100):\$489 (\$683.84),  
MC(1-19):\$4847 (\$6778.27),  
MC(20-39):\$5973 (\$8352.92),  
MC(40-59):\$5113 (\$7150.26),  
MC(60-79):\$4977 (\$6960.07),  
MC(80-100):\$4383 (\$6129.39),  
Hypercholesterolemia:  
TC(1-19):\$6888 (\$9632.50),  
TC(20-39):\$4999 (\$6990.84),  
TC(40-59):\$3825 (\$5349.06),  
TC(60-79):\$5541 (\$7748.79),  
TC(80-100):\$3924(\$5487.51),  
PC(1-19):\$78 (\$109.08),  
PC(20-39):\$213 (\$297.87),  
PC(40-59):\$373 (\$521.62),  
PC(60-79):\$603 (\$843.26),



Stroupe et al[10]  
2006  
US

To determine the rates of undersupply, appropriate supply, and oversupply of antihypertensive drugs as measured by refill adherence, among patient with complicated and uncomplicated hypertension and to

Design: Retrospective cohort study  
Follow Up: 3.3 years  
Sample Size: 15206 (not specified)

Measure: MPR  
Classification:  
MPR<80 = undersupply, MPR >120 = oversupply  
Method of Assessment:  
pharmacy claims data

Total Healthcare Costs  
Inpatient Costs  
Outpatient Costs  
Pharmacy Costs

PC(80-100):\$801 (\$1120.16),  
MC(1-19):\$6810 (\$9523.42),  
MC(20-39):\$4786 (\$6692.97),  
MC(40-59):\$3452 (\$4827.44),  
MC(60-79):\$4938 (\$6905.53),  
MC(80-100):\$3124 (\$4368.75),  
CHF:  
TC(1-19):\$9841 (\$13762.12),  
TC(20-39):\$7733 (\$10814.19),  
TC(40-59):\$11378 (\$15911.53),  
TC(60-79):\$13924 (\$19471.98),  
TC(80-100):\$12698 (\$17787.48),  
PC(1-19):\$15 (\$20.98),  
PC(20-39):\$90 (\$125.86),  
PC(40-59):\$134 (\$187.39),  
PC(60-79):\$158 (\$220.95),  
PC(80-100):\$437 (\$611.12),  
MC(1-19):\$9826 (\$13741.14),  
MC(20-39):\$7643 (\$10688.33),  
MC(40-59):\$11244 (\$15724.14),  
MC(60-79):\$13766 (\$19251.02),  
MC(80-100):\$12261 (\$17146.36)  
Type of Costs: unadjusted  
Classification: disease state specific  
Currency Year: USD, 2002  
Cost of Nonadherence \*\*: THC:\$6032.5 (\$7830.11), IC:\$2067 (\$2682.94), OC:\$3965 (\$5146.52), PC:\$130 (\$168.74)

Quality: medium  
Classification: cost description

|                                              |                                                                                                                                                                                                                                                                                        |                                                                                                                                                                                                                   |                                                                                                                                                                                           |                                                                    |                                                                                                                                                                                                                                                                                                                                                                                                                                                                                                                                                                                                     |                                                                           |
|----------------------------------------------|----------------------------------------------------------------------------------------------------------------------------------------------------------------------------------------------------------------------------------------------------------------------------------------|-------------------------------------------------------------------------------------------------------------------------------------------------------------------------------------------------------------------|-------------------------------------------------------------------------------------------------------------------------------------------------------------------------------------------|--------------------------------------------------------------------|-----------------------------------------------------------------------------------------------------------------------------------------------------------------------------------------------------------------------------------------------------------------------------------------------------------------------------------------------------------------------------------------------------------------------------------------------------------------------------------------------------------------------------------------------------------------------------------------------------|---------------------------------------------------------------------------|
| <p><i>Wu et al</i>[11]<br/>2011<br/>US</p>   | <p>examine the association of refill adherence with hospitalization and healthcare costs among these patients.<br/>To study statin adherence and assess associated medical utilisation and healthcare costs in patients with type 2 diabetes, based on national Medicaid database.</p> | <p><u>Design:</u> Retrospective cohort study<br/><u>Follow Up:</u> 1 year<br/><u>Sample Size:</u> 1705 (A:624, NA:1081)</p>                                                                                       | <p><u>Measure:</u> MPR<br/><u>Classification:</u> MPR≥80 = adherent, MPR &lt;80 = nonadherent<br/><u>Method of Assessment:</u> pharmacy claims data</p>                                   | <p>Total Healthcare Costs<br/>Pharmacy Costs<br/>Medical Costs</p> | <p><u>Type of Costs:</u> adjusted<br/><u>Classification:</u> all cause and disease state specific<br/><u>Currency Year:</u> USD, 2005<br/><u>Cost of Nonadherence:</u> all cause: THC:\$17807 (\$21370.30), PC:\$4915 (\$5898.52) MC:\$12892 (\$15471.77)<br/>Disease state specific: THC:\$2789 (\$3347.10), PC:\$489(\$586.85) MC:\$2300 (\$2760.25)</p>                                                                                                                                                                                                                                          | <p><u>Quality:</u> medium<br/><u>Classification:</u> cost description</p> |
| <p><i>Zhao et al</i>[12]<br/>2014<br/>US</p> | <p>To evaluate the associations between statin adherence level, healthcare costs, hospital admissions and emergency room visits after statin therapy is taken for 1 year.</p>                                                                                                          | <p><u>Design:</u> Retrospective cohort study<br/><u>Follow Up:</u> 1 year<br/><u>Sample Size:</u> 10312 (96-100: 2453, 90-95: 1496, 85-89: 584, 80-84: 768, 70-79: 960, 60-69: 777, 40-59: 1687, &lt;40:1587)</p> | <p><u>Measure:</u> MPR<br/><u>Classification:</u> &lt;40%, 40-59%, 60-69%, 70-79%, 80-84%, 85-89%, 90-95%, 96-100%<br/><u>Method of Assessment:</u> pharmacy claims data, census data</p> | <p>Total Healthcare Costs<br/>Pharmacy Costs<br/>Medical Costs</p> | <p><u>Type of Costs:</u> unadjusted<br/><u>Classification:</u> all cause and disease state specific<br/><u>Currency Year:</u> USD, 2010<br/><u>Cost of Nonadherence:</u> all cause: PC(96-100):\$2976.80 (\$3247.04), PC(90-95):\$2826.99 (\$3083.63), PC(85-89):\$2795.39 (\$3049.16), PC(80-84):\$2690.89 (\$2935.17), PC(70-79):\$2192.83 (\$2391.90), PC(60-69):\$2323.27 (\$2534.18), PC(40-59):\$2153.93 (\$2349.47), PC(&lt;40):\$1749.18 (\$1907.97)<br/>Disease state specific: THC(96-100):\$6536.05 (\$7129.40), THC(90-95):\$6493.80 (\$7083.31), THC(85-89):\$6459.40 (\$7045.79),</p> | <p><u>Quality:</u> medium<br/><u>Classification:</u> cost description</p> |

THC(80-84):\$6227.47 (\$6792.80),  
 THC(70-79):\$5713.47 (\$6232.14),  
 THC(60-69):\$5875.26 (\$6408.62),  
 THC(40-59):\$5817.58 (\$6345.70),  
 THC(<40):\$5249.12 (\$5725.64),  
 PC(96-100):\$449.86 (\$490.70), PC(90-95):\$439.74 (\$479.66),  
 PC(85-89):\$458.83 (\$500.48),  
 PC(80-84):\$423.15 (\$461.56),  
 PC(70-79):\$356.74 (\$389.13),  
 PC(60-69):\$371.30 (\$405.01),  
 PC(40-59):\$279.21 (\$304.56),  
 PC(<40):\$133.92 (\$146.08),  
 MC(96-100):\$3559.25 (\$3882.36),  
 MC(90-95):\$3666.81 (\$3999.69),  
 MC(85-89):\$3664 (\$3996.62), MC(80-84):\$3586.58 (\$3912.17), MC(70-79):\$3520.64 (\$3840.25), MC(60-69):\$3551.99 (\$3874.44), MC(40-59):\$3663.65 (\$3996.24),  
 MC(<40):\$3499.95 (\$3817.68)

**Mental Health**

|                                                  |                                                                                                                                                                        |                                                                                                                            |                                                                                                                                                         |                                                                                                        |                                                                                                                                                                                                                                                            |                                                                           |
|--------------------------------------------------|------------------------------------------------------------------------------------------------------------------------------------------------------------------------|----------------------------------------------------------------------------------------------------------------------------|---------------------------------------------------------------------------------------------------------------------------------------------------------|--------------------------------------------------------------------------------------------------------|------------------------------------------------------------------------------------------------------------------------------------------------------------------------------------------------------------------------------------------------------------|---------------------------------------------------------------------------|
| <p><i>Bagalman et al</i>[13]<br/>2010<br/>US</p> | <p>To examine the association between treatment adherence and indirect productivity costs within a cohort of commercially insured employees with bipolar disorder.</p> | <p><u>Design:</u> Retrospective cohort study<br/><u>Follow Up:</u> 1 year<br/><u>Sample Size:</u> 1258 (A:444, NA:814)</p> | <p><u>Measure:</u> MPR<br/><u>Classification:</u> MPR≥80 = adherent, MPR &lt;80 = nonadherent<br/><u>Method of Assessment:</u> pharmacy claims data</p> | <p>Total Costs<br/>Short term disability cost<br/>Workers compensation cost<br/>Paid time off cost</p> | <p><u>Type of Costs:</u> adjusted<br/><u>Classification:</u> disease state specific<br/><u>Currency Year:</u> USD, 2005<br/><u>Cost of Nonadherence:</u> TC:\$6894 (\$8273.53), STDC:\$2134 (\$2561.03), WCC:\$762 (\$914.48), PTOC:\$3998 (\$4798.03)</p> | <p><u>Quality:</u> medium<br/><u>Classification:</u> cost description</p> |
| <p><i>Becker et al</i>[14]</p>                   | <p>Examine treatment</p>                                                                                                                                               | <p><u>Design:</u> Retrospective</p>                                                                                        | <p><u>Measure:</u></p>                                                                                                                                  | <p>Total Costs</p>                                                                                     | <p><u>Type of Costs:</u> unadjusted</p>                                                                                                                                                                                                                    | <p><u>Quality:</u> low</p>                                                |

|                                        |                                                                                                                                                                                    |                                                                                                                                             |                                                                                                                                                                                                                                      |                                                                                                                                                                                                                                                             |                                                                                                                                                                                                                                                                                                             |                                                                   |
|----------------------------------------|------------------------------------------------------------------------------------------------------------------------------------------------------------------------------------|---------------------------------------------------------------------------------------------------------------------------------------------|--------------------------------------------------------------------------------------------------------------------------------------------------------------------------------------------------------------------------------------|-------------------------------------------------------------------------------------------------------------------------------------------------------------------------------------------------------------------------------------------------------------|-------------------------------------------------------------------------------------------------------------------------------------------------------------------------------------------------------------------------------------------------------------------------------------------------------------|-------------------------------------------------------------------|
| 2007<br>US                             | outcomes and costs associated with adherence rates by antipsychotic medication class for Medicaid beneficiaries.                                                                   | cohort study<br><u>Follow Up:</u> 2 years<br><u>Sample Size:</u> 10330 (>75%:6609, 50-74%:1276, 25-49%:1940, <25%:505)                      | prescription refill rate<br><u>Classification:</u> 75-100% = maximal adherence, 50-74.9% = moderate adherence, 25-49.9% = minimal adherence, <25% = negligible adherence<br><u>Method of Assessment:</u><br>pharmacy claims data     | <u>Classification:</u> disease state specific<br><u>Currency Year:</u> USD, 2006<br><u>Cost of Nonadherence*:</u><br>TC(75-100):\$13564 (\$15792.91),<br>TC(50-74):\$13772 (\$16035.09),<br>TC(25-49):\$15792 (\$18387.03),<br>TC(<25):\$16156 (\$18810.84) | <u>Classification:</u> cost description                                                                                                                                                                                                                                                                     |                                                                   |
| <i>Eddy et al</i> [15]<br>2005<br>US   | To evaluate the effect of partial compliance of patients with prescribed oral atypical and conventional antipsychotic agents and the corresponding impact on resource utilisation. | <u>Design:</u> Retrospective database analysis<br><u>Follow Up:</u> 1 year<br><u>Sample Size:</u> 7864 (<80%:2655, 80-125%:5065, >125%:144) | <u>Measure:</u><br>continuous multiple interval medications available<br><u>Classification:</u><br><80% = partially compliant, 80-125% = compliant, >125% = overly compliant<br><u>Method of Assessment:</u><br>pharmacy claims data | Inpatient costs<br>Outpatient costs<br>Pharmacy costs<br>Medical costs<br>Physician office visit costs<br>Other costs                                                                                                                                       | <u>Type of Costs:</u> unadjusted<br><u>Classification:</u> disease state specific<br><u>Currency Year:</u> USD, 2002<br><u>Cost of Nonadherence*:</u><br>IC:\$3780 (\$4906.39),<br>OC:\$504 (\$654.19),<br>PC:\$1872 (\$2429.83),<br>MC:\$6228 (\$8083.86),<br>POC:\$1944 (\$2523.29)<br>OtC:\$12 (\$15.58) | <u>Quality:</u> medium<br><u>Classification:</u> cost description |
| <i>Gilmer et al</i> [16]<br>2004<br>US | To evaluate the relationship between adherence to                                                                                                                                  | <u>Design:</u> Retrospective database analysis<br><u>Follow Up:</u> 1 year                                                                  | <u>Measure:</u><br>cumulative possession ratio                                                                                                                                                                                       | Total costs<br>Outpatient costs                                                                                                                                                                                                                             | <u>Type of Costs:</u> adjusted<br><u>Classification:</u> disease state specific<br><u>Currency Year:</u> USD, 1999                                                                                                                                                                                          | <u>Quality:</u> medium<br><u>Classification:</u> cost description |

treatment with antipsychotic medication and health expenditures. Secondary objective was to identify risk factors predictive of non-adherence.

Sample Size: 1619 (<49%:388, 50-79%:259, 80-100%:664, >110%:308)

Classification: <49% = nonadherent, 50-79% = partially adherent, 80-100% = adherent, >110% = excess medication fillers  
Method of Assessment: pharmacy claims data

Pharmacy costs  
Hospitalization costs

Cost of Nonadherence:  
TC:\$8168 (\$11261.74),  
OC:\$3464 (\$4776.04),  
PC:\$1542 (\$2126.05),  
HC:\$3413 (\$4705.72)

*Hong et al*[17]  
2011  
UK

To investigate clinical and economic consequences of medication non-adherence in the treatment of bipolar disorder following a manic or mixed episode.

Design: Prospective observational study  
Follow Up: 21 months  
Sample Size: 1341(A:1024, NA:317)

Measure: assessed by treating psychiatrist  
Classification: adherent vs. nonadherent  
Method of Assessment: observational assessment

Total costs  
Inpatient costs  
Outpatient costs  
Pharmacy costs  
Hospitalization costs

Type of Costs: unadjusted  
Classification: all cause and disease state specific  
Currency Year: GBP, 2008  
Cost of Nonadherence \*: all cause:  
PC:£55.43 (\$94.47)  
Disease state specific:  
TC:£5846.29 (\$9964.10)  
IC:£2740.57 (\$4670.88),  
OC:£1082.86 (\$1845.57),  
PC:£1630.29 (\$2778.58),  
HC:£337.14 (\$574.60)

Quality: medium  
Classification: cost description

*Jiang et al*[18]  
2015  
US

To estimate the impact of adherence to and persistence with atypical antipsychotics on healthcare costs and risk of hospitalization by controlling potential sources of endogeneity

Design: Retrospective cohort study  
Follow Up: 2 years  
Sample Size: 32374 (A:11642, NA:20732)

Measure: PDC  
Classification: (PDC≥80% = adherent, PDC<80% = nonadherent)  
Method of Assessment: medical and

Total costs  
Pharmacy costs  
Medical services costs

Type of Costs: unadjusted  
Classification: disease state specific  
Currency Year: USD, 2011  
Cost of Nonadherence:  
Disease state specific:  
TC:\$14141 (\$14517.37)  
PC:\$3971 (\$4076.69),  
MSC:\$10170 (\$10440.68)

Quality: low  
Classification: cost description

|                                                      |                                                                                                                                                        |                                                                                                                                               |                                                                                                                                                                                                                                                                                                                   |                                                                    |                                                                                                                                                                                                                                                               |                                                                                   |
|------------------------------------------------------|--------------------------------------------------------------------------------------------------------------------------------------------------------|-----------------------------------------------------------------------------------------------------------------------------------------------|-------------------------------------------------------------------------------------------------------------------------------------------------------------------------------------------------------------------------------------------------------------------------------------------------------------------|--------------------------------------------------------------------|---------------------------------------------------------------------------------------------------------------------------------------------------------------------------------------------------------------------------------------------------------------|-----------------------------------------------------------------------------------|
| <p><i>Joe et al[19]</i><br/>2016<br/>South Korea</p> | <p>To investigate the association between psychiatric medication non-compliance and psychiatric and non-psychiatric service utilisation and costs.</p> | <p><u>Design:</u> Retrospective cohort study<br/><u>Follow Up:</u> 1 year<br/><u>Sample Size:</u> 7848 (A:2774, NA:2774, P:1956, NP:1956)</p> | <p>pharmacy claims data<br/><u>Measure:</u> percentage of days of psychiatric prescription (PDP)<br/><u>Classification:</u> PDP≥80% = adherent, PDP&lt;80% = nonadherent; persistent = continued medication without interruption ≥ 56 day, non-persistent = at least one medication interruption &gt; 56 days</p> | <p>Total costs</p>                                                 | <p><u>Type of Costs:</u> adjusted<br/><u>Classification:</u> all cause and disease state specific<br/><u>Currency Year:</u> USD, 2011<br/><u>Cost of Nonadherence:</u> all cause: TC:\$4961 (\$5271.40)<br/>Disease state specific: TC:\$3061 (\$3252.50)</p> | <p><u>Quality:</u> medium<br/><u>Classification:</u> cost outcome description</p> |
| <p><i>Knapp et al[20]</i><br/>2004<br/>UK</p>        | <p>To assess the relative impact of non-adherence and other factors associated with resource use and costs incurred by people with schizophrenia.</p>  | <p><u>Design:</u> Retrospective cohort study<br/><u>Follow Up:</u> 1 year<br/><u>Sample Size:</u> 658 (A:549, NA:109)</p>                     | <p><u>Method of Assessment:</u> health insurance data<br/><u>Measure:</u> self-report<br/><u>Classification:</u> adherent vs. nonadherent<br/><u>Method of Assessment:</u></p>                                                                                                                                    | <p>Total costs<br/>Inpatient costs<br/>External services costs</p> | <p><u>Type of Costs:</u> predicted<br/><u>Classification:</u> disease state specific<br/><u>Currency Year:</u> GBP, 2001<br/><u>Cost of Nonadherence:</u> TC:£57580 (\$116434.12)<br/>IC:£6714 (\$13576.57),<br/>ESC:£1603 (\$3241.47)</p>                    | <p><u>Quality:</u> medium<br/><u>Classification:</u> cost analysis</p>            |

|                                                   |                                                                                                                                                                                           |                                                                                                                                                         |                                                                                                                                                                     |                                                                                                         |                                                                                                                                                                                                                                                                                                                                                                                                                                       |                                                                           |
|---------------------------------------------------|-------------------------------------------------------------------------------------------------------------------------------------------------------------------------------------------|---------------------------------------------------------------------------------------------------------------------------------------------------------|---------------------------------------------------------------------------------------------------------------------------------------------------------------------|---------------------------------------------------------------------------------------------------------|---------------------------------------------------------------------------------------------------------------------------------------------------------------------------------------------------------------------------------------------------------------------------------------------------------------------------------------------------------------------------------------------------------------------------------------|---------------------------------------------------------------------------|
| <p><i>Offord et al[21]</i><br/>2013<br/>US</p>    | <p>To quantify early nonadherence to antipsychotic medications in patients with schizophrenia and its impact on short-term antipsychotic adherence, healthcare utilisation and costs.</p> | <p><u>Design:</u> Retrospective cohort study<br/><u>Follow Up:</u> 1 year<br/><u>Sample Size:</u> 1462 (A:589, NA:873)</p>                              | <p>survey<br/><u>Measure:</u> time to discontinuation<br/><u>Classification:</u> adherent vs. nonadherent<br/><u>Method of Assessment:</u> pharmacy claims data</p> | <p>Total costs<br/>Outpatient costs<br/>Pharmacy costs<br/>Hospitalization costs</p>                    | <p><u>Type of Costs:</u> adjusted<br/><u>Classification:</u> all cause and disease state specific<br/><u>Currency Year:</u> USD, 2008<br/><u>Cost of Nonadherence:</u> all cause:<br/>TC:\$15400 (\$17132.34)<br/>OC:\$5773 (\$6422.40),<br/>PC:\$3777 (\$4201.87),<br/>HC:\$5850 (\$6508.06)<br/>Disease state specific:<br/>TC:\$5358 (\$5960.72)<br/>OC:\$858 (\$954.52),<br/>PC:\$1549 (\$1723.25),<br/>HC:\$2952 (\$3284.07)</p> | <p><u>Quality:</u> medium<br/><u>Classification:</u> cost description</p> |
| <p><i>Offord et al[22]</i><br/>2013<br/>US</p>    | <p>To examine the impact of medication adherence on healthcare utilisation among Medicare insured schizophrenia patients.</p>                                                             | <p><u>Design:</u> Retrospective cohort study<br/><u>Follow Up:</u> 1 year<br/><u>Sample Size:</u> 354 (A:126, NA:228)</p>                               | <p><u>Measure:</u> MPR<br/><u>Classification:</u> MPR ≥ 70= high adherence, MPR &lt; 70 = low adherence<br/><u>Method of Assessment:</u> pharmacy claims data</p>   | <p>Inpatient costs<br/>Pharmacy costs</p>                                                               | <p><u>Type of Costs:</u> adjusted<br/><u>Classification:</u> all cause and disease state specific<br/><u>Currency Year:</u> USD, 2008<br/><u>Cost of Nonadherence:</u> all cause:<br/>IC:\$9053 (\$10071.37),<br/>PC:\$4267 (\$4746.99),<br/>Disease state specific:<br/>IC:\$2468 (\$2745.62),<br/>PC:\$1085 (\$1207.05)</p>                                                                                                         | <p><u>Quality:</u> low<br/><u>Classification:</u> cost description</p>    |
| <p><i>Robertson et al[23]</i><br/>2014<br/>US</p> | <p>To examine the impact of the combination of treatment utilization and medication possession on arrest and incarceration outcomes and on costs.</p>                                     | <p><u>Design:</u> Retrospective cohort study<br/><u>Follow Up:</u> 90 days<br/><u>Sample Size:</u> 1376 (90/90:637, 60/90:240, 30/90:174, 0/90:316)</p> | <p><u>Measure:</u> MPR<br/><u>Classification:</u> MPR ≥80% = adherent<br/><u>Method of Assessment:</u> Medicaid claims data</p>                                     | <p>Total costs<br/>Inpatient costs<br/>Outpatient costs<br/>Emergency department costs<br/>Pharmacy</p> | <p><u>Type of Costs:</u> unadjusted<br/><u>Classification:</u> disease state specific<br/><u>Currency Year:</u> USD, 2005<br/><u>Cost of Nonadherence*:</u><br/>TC(90/90):\$28068 (\$33495.65),<br/>TC(60/90):\$21720 (\$25920.11),<br/>TC(30/90):\$21084 (\$25161.12),<br/>TC(0/90):\$12516 (\$14936.28),</p>                                                                                                                        | <p><u>Quality:</u> medium<br/><u>Classification:</u> cost description</p> |

costs IC(90/90):\$12168 (\$14520.99),  
 Target case IC(60/90):\$10068 (\$12014.90),  
 management IC(30/90):\$11376 (\$13575.84),  
 costs IC(0/90):\$5592 (\$6673.35),  
 Psychiatric OC(90/90):\$6468 (\$7718.75),  
 assessment OC(60/90):\$4152 (\$4954.89),  
 costs OC(30/90):\$2916 (\$3479.88),  
 Arrest costs OC(0/90):\$2136 (\$2549.05),  
 Incarceration EDC(90/90):\$96 (\$114.56),  
 costs EDC(60/90):\$108 (\$128.88),  
 EDC(30/90):\$144 (\$171.85),  
 EDC(0/90):\$84 (\$100.24),  
 PC(90/90):\$5316 (\$6343.98),  
 PC(60/90):\$3468 (\$4138.63),  
 PC(30/90):\$2232 (\$2663.61),  
 PC(0/90):\$984 (\$1174.28),  
 TCMC(90/90):\$2100 (\$2506.09),  
 TCMC(60/90):\$1404 (\$1675.50),  
 TCMC(30/90):\$1596 (\$1904.63),  
 TCMC(0/90):\$516 (\$615.78),  
 PAC(90/90):\$240 (\$286.41),  
 PAC(60/90):\$228 (\$272.09),  
 PAC(30/90):\$204 (\$243.45),  
 PAC(0/90):\$156 (\$186.17),  
 ArC(90/90):\$780 (\$930.83),  
 ArC(60/90):\$1032 (\$1231.56),  
 ArC(30/90):\$1140 (\$1360.45),  
 ArC(0/90):\$1200 (\$1432.05),  
 InC(90/90):\$888 (\$1059.72),  
 InC(60/90):\$1272 (\$1517.97),  
 InC(30/90):\$1476 (\$1761.42),  
 InC(0/90):\$1860 (\$2219.68)

Robinson et al[24]

To determine if the

Design: Retrospective

Measure:

Total costs

Type of Costs: unadjusted

Quality: medium



|                                          |                                                                                                                              |                                                                                                                       |                                                                                                                                                                                                                                         |                                                                                                         |                                                                                                                                                                                                                                                                                                                                                                                                                                                                                 |                                                                   |
|------------------------------------------|------------------------------------------------------------------------------------------------------------------------------|-----------------------------------------------------------------------------------------------------------------------|-----------------------------------------------------------------------------------------------------------------------------------------------------------------------------------------------------------------------------------------|---------------------------------------------------------------------------------------------------------|---------------------------------------------------------------------------------------------------------------------------------------------------------------------------------------------------------------------------------------------------------------------------------------------------------------------------------------------------------------------------------------------------------------------------------------------------------------------------------|-------------------------------------------------------------------|
| 2006<br>US                               | type of antidepressant drug is related to adherence and assess the 6 month health care costs among newly diagnosed patients. | claims analysis<br><u>Follow Up:</u> 6 months<br><u>Sample Size:</u> 60386 (A:11526, NA:8860)                         | Antidepressant medication management measures<br><u>Classification:</u> meeting less than <3 medication management measures = nonadherent<br><u>Method of Assessment:</u> pharmacy claims data, Medicaid data, observational assessment | Inpatient costs<br>Outpatient costs<br>ED visit costs<br>Pharmacy costs<br>Physician office visit costs | <u>Classification:</u> all cause and disease state specific<br><u>Currency Year:</u> USD, 2004<br><u>Cost of Nonadherence*:</u> all cause:<br>TC:\$12658 (\$15678.21)<br>IC:\$3006 (\$3723.24),<br>OC:\$6118 (\$7577.76),<br>EDC:\$334 (\$413.69)<br>PC:\$3200 (\$3963.52),<br>POC:\$178 (\$220.47)<br>Disease state specific:<br>TC:\$2028 (\$2511.88)<br>IC:\$102 (\$126.34),<br>OC:\$734 (\$909.13),<br>EDC:\$18 (\$22.29)<br>PC:\$1174 (\$1454.12),<br>POC:\$120 (\$148.63) | <u>Classification:</u> cost description                           |
| <i>Svarstad et al</i> [25]<br>2001<br>US | To examine the relationship of medication non-adherence to hospital use and costs among severely mentally ill clients.       | <u>Design:</u> Retrospective database analysis<br><u>Follow Up:</u> 1 year<br><u>Sample Size:</u> 619 (A:413, NA:206) | <u>Measure:</u> quarter pharmacy claims<br><u>Classification:</u> one or more quarters without a claim = nonadherent<br><u>Method of Assessment:</u> pharmacy claims data, previous study data                                          | Hospitalization costs                                                                                   | <u>Type of Costs:</u> unadjusted<br><u>Classification:</u> all cause and disease state specific<br><u>Currency Year:</u> USD, 1990<br><u>Cost of Nonadherence:</u> all cause:<br>HC:\$3992 (\$6593.06)<br>Disease state specific:<br>Schizophrenia/schizoaffective disorder:<br>HC:\$3421 (\$5650.01)<br>Bipolar disorder:<br>HC:\$9701 (\$16021.85),<br>Other severe mental illness:<br>HCD:\$3024 (\$4994.34)                                                                 | <u>Quality:</u> medium<br><u>Classification:</u> cost description |
| <i>White et al</i> [26]<br>2003<br>US    | To evaluate the economic impact of antidepressant                                                                            | <u>Design:</u> Retrospective database analysis<br><u>Follow Up:</u> 6 months                                          | <u>Measure:</u> MPR<br><u>Classification:</u> MPR≥70% =                                                                                                                                                                                 | Total costs<br>Pharmacy costs                                                                           | <u>Type of Costs:</u> adjusted<br><u>Classification:</u> disease state specific<br><u>Currency Year:</u> USD, 1999                                                                                                                                                                                                                                                                                                                                                              | <u>Quality:</u> medium<br><u>Classification:</u> cost description |

|                                        |                                                                                                                                                                                          |                                                                                                                             |                                                                                                                                                                     |                                                          |                                                                                                                                                                                                                                                              |                                                                   |
|----------------------------------------|------------------------------------------------------------------------------------------------------------------------------------------------------------------------------------------|-----------------------------------------------------------------------------------------------------------------------------|---------------------------------------------------------------------------------------------------------------------------------------------------------------------|----------------------------------------------------------|--------------------------------------------------------------------------------------------------------------------------------------------------------------------------------------------------------------------------------------------------------------|-------------------------------------------------------------------|
|                                        | treatment adherence among patients treated for depression                                                                                                                                | <u>Sample Size:</u> 14190 (A:5638, NA:8552)                                                                                 | adherent, MPR<70% = nonadherent<br><u>Method of Assessment:</u> pharmacy claims data                                                                                | Medical costs                                            | <u>Cost of Nonadherence:</u><br>TC:\$11815 (\$16290.09)<br>PC:\$1123 (\$1548.35),<br>MC:\$10692 (\$14741.74)                                                                                                                                                 |                                                                   |
| <b>Diabetes</b>                        |                                                                                                                                                                                          |                                                                                                                             |                                                                                                                                                                     |                                                          |                                                                                                                                                                                                                                                              |                                                                   |
| <i>An et al[27]</i><br>2014<br>Korea   | This study evaluated the association between medication adherence and clinical/economic outcomes in patients with type II diabetes mellitus in the republic of Korea over 3 year period. | <u>Design:</u> Prospective cohort study<br><u>Follow Up:</u> 3 years<br><u>Sample Size:</u> 608 (A:472, NA:136)             | <u>Measure:</u> MPR<br><u>Classification:</u> MPR≥90% = adherent, MPR<90% = nonadherent<br><u>Method of Assessment:</u> pharmacy claims data                        | Total costs<br>Outpatient costs<br>Hospitalization costs | <u>Type of Costs:</u> unadjusted<br><u>Classification:</u> disease state specific<br><u>Currency Year:</u> USD, 2007<br><u>Cost of Nonadherence*:</u><br>TC:\$1657.11 (\$1884.14)<br>OC: \$1413.99 (\$1608.20),<br>HC: \$243.11 (\$276.12)                   | <u>Quality:</u> medium<br><u>Classification:</u> cost description |
| <i>Buysman et al[28]</i><br>2017<br>US | To examine the impact of real world adherence on glycaemic control in type 2 diabetes patients treated with canagliflozin.                                                               | <u>Design:</u> Retrospective database analysis<br><u>Follow Up:</u> 12 months<br><u>Sample Size:</u> 2261 (A:1215, NA:1046) | <u>Measure:</u> PDC<br><u>Classification:</u> PDC≥80% = highly adherent, PDC<80% = less than highly adherent<br><u>Method of Assessment:</u> healthcare claims data | Pharmacy costs                                           | <u>Type of Costs:</u> unadjusted<br><u>Classification:</u> all cause and disease state specific<br><u>Currency Year:</u> USD, 2014<br><u>Cost of Nonadherence:</u> all cause:<br>PC: \$7225 (\$7297.39)<br>Disease state specific:<br>PC: \$4660 (\$4706.69) | <u>Quality:</u> low<br><u>Classification:</u> cost description    |
| <i>Curtis et al[29]</i><br>2017<br>US  | Examine the association between adherence to glucose lowering agents and                                                                                                                 | <u>Design:</u> Retrospective analysis<br><u>Follow Up:</u> 3 years<br><u>Sample Size:</u> 228074                            | <u>Measure:</u> PDC<br><u>Classification:</u> PDC≥80% = adherent,                                                                                                   | Total costs<br>Outpatient costs<br>Pharmacy              | <u>Type of Costs:</u> adjusted<br><u>Classification:</u> all cause<br><u>Currency Year:</u> USD, 2014<br><u>Cost of Nonadherence:</u>                                                                                                                        | <u>Quality:</u> medium<br><u>Classification:</u> cost description |

|                                    |                                                                                                                                                                                                                         |                                                                                                                                   |                                                                                                                                              |                                                                                                      |                                                                                                                                                                                                                                                                                                                                                                                                                                     |                                                                         |
|------------------------------------|-------------------------------------------------------------------------------------------------------------------------------------------------------------------------------------------------------------------------|-----------------------------------------------------------------------------------------------------------------------------------|----------------------------------------------------------------------------------------------------------------------------------------------|------------------------------------------------------------------------------------------------------|-------------------------------------------------------------------------------------------------------------------------------------------------------------------------------------------------------------------------------------------------------------------------------------------------------------------------------------------------------------------------------------------------------------------------------------|-------------------------------------------------------------------------|
|                                    | patient outcomes in an adult type 2 diabetes population                                                                                                                                                                 | (A:117864, NA:110210)                                                                                                             | PDC<80% = nonadherent<br><u>Method of Assessment:</u> healthcare claims data                                                                 | costs<br>Acute care costs                                                                            | TC:\$38633 (\$39020.09)<br>OC: \$16964 (\$17134),<br>PC: \$9390 (\$9484.08),<br>ACC:\$12153 (\$12274.77)                                                                                                                                                                                                                                                                                                                            |                                                                         |
| Egede et al[30]<br>2012<br>US      | To examine the longitudinal effects of medication nonadherence on key costs and estimate potential savings from increased adherence using novel methodology that accounts for shared correlation among cost categories. | <u>Design:</u> Retrospective cohort study<br><u>Follow Up:</u> 5 years<br><u>Sample Size:</u> 740195 (A:427390, NA:312805)        | <u>Measure:</u> MPR<br><u>Classification:</u> MPR≥80% = adherent, MPR<80% = nonadherent<br><u>Method of Assessment:</u> pharmacy claims data | Inpatient costs<br>Outpatient costs<br>Pharmacy costs                                                | <u>Type of Costs:</u> unadjusted<br><u>Classification:</u> disease state specific<br><u>Currency Year:</u> USD, 2006<br><u>Cost of Nonadherence*:</u> IC:\$14515.24 (\$17886.40)<br>OC: \$3599.27 (\$4434.16),<br>PC: \$1073.12 (\$1322.42)                                                                                                                                                                                         | <u>Quality:</u> high<br><u>Classification:</u> cost outcome description |
| Gentil et al[31]<br>2015<br>Canada | To examine healthcare costs associated with adherence to oral antihyperglycemic agents and the effects of depression and anxiety disorders on these in older adults with type 2 diabetes                                | <u>Design:</u> Retrospective, observational cohort analysis<br><u>Follow Up:</u> 1 year<br><u>Sample Size:</u> 301 (A:224, NA:77) | <u>Measure:</u> MPR<br><u>Classification:</u> MPR≥80% = adherent, MPR<80% = nonadherent<br><u>Method of Assessment:</u> pharmacy claims data | Total costs<br>Inpatient costs<br>Outpatient costs<br>Pharmacy costs<br>Physician office visit costs | <u>Type of Costs:</u> adjusted and unadjusted<br><u>Classification:</u> all cause and disease state specific<br><u>Currency Year:</u> CAD, 2010<br><u>Cost of Nonadherence:</u> Adjusted all cause: TC:\$11124 (\$9818.67), IC:\$7419 (\$6548.43)<br>OC: \$2687 (\$2371.70), PC: \$504 (\$444.86), POC:\$513 (\$452.80)<br>Adjusted disease state specific: TC:\$4477 (\$3951.65), IC:\$2836 (\$2503.21)<br>OC: \$1518 (\$1339.87), | <u>Quality:</u> medium<br><u>Classification:</u> cost description       |

|                                        |                                                                                                                                   |                                                                                                                                                |                                                                                                                                                            |                                                                                              |                                                                                                                                                                                                                                                                                                                                                                                                                                                                                                                                                                                                                                                                                                                                                                                                                                                                                                                                                                                                     |                                                                           |
|----------------------------------------|-----------------------------------------------------------------------------------------------------------------------------------|------------------------------------------------------------------------------------------------------------------------------------------------|------------------------------------------------------------------------------------------------------------------------------------------------------------|----------------------------------------------------------------------------------------------|-----------------------------------------------------------------------------------------------------------------------------------------------------------------------------------------------------------------------------------------------------------------------------------------------------------------------------------------------------------------------------------------------------------------------------------------------------------------------------------------------------------------------------------------------------------------------------------------------------------------------------------------------------------------------------------------------------------------------------------------------------------------------------------------------------------------------------------------------------------------------------------------------------------------------------------------------------------------------------------------------------|---------------------------------------------------------------------------|
| <p>Hagen et al[32]<br/>2014<br/>US</p> | <p>To evaluate the relationships between compliance with oral hypoglycemic agents and healthcare/ short term disability costs</p> | <p><u>Design:</u> Retrospective, observational cohort analysis<br/><u>Follow Up:</u> 1 year<br/><u>Sample Size:</u> 4978 (A:2820, NA:2158)</p> | <p><u>Measure:</u> PDC<br/><u>Classification:</u> PDC≥80% = compliant, PDC&lt;80% = noncompliant<br/><u>Method of Assessment:</u> pharmacy claims data</p> | <p>Healthcare costs<br/>Pharmacy costs<br/>Medical costs<br/>Short term disability costs</p> | <p>PC<sup>###</sup>: \$-444 (\$-391.90),<br/>POC:\$568 (\$517.24)<br/>Unadjusted all cause:<br/>TC:\$14979 (\$13221.30),<br/>IC:\$6351 (\$5605.75)<br/>OC: \$4058 (\$3581.82),<br/>PC: \$3503 (\$3091.94),<br/>POC:\$1066 (\$940.91)<br/>Unadjusted disease state specific:<br/>TC:\$9008 (\$7950.97),<br/>IC:\$2854 (\$2519.10)<br/>OC: \$2654 (\$2342.57),<br/>PC: \$2498 (\$2204.87),<br/>POC:\$1002 (\$884.42)<br/><u>Type of Costs:</u> adjusted and unadjusted<br/><u>Classification:</u> all cause and disease state specific<br/><u>Currency Year:</u> USD, 2003<br/><u>Cost of Nonadherence:</u> Adjusted all cause:<br/>PC: \$1668 (\$2065.99),<br/>Adjusted disease state specific:<br/>HC:\$7642 (\$9465.39), PC:\$614 (\$760.50), MC:\$5974 (\$7399.40),<br/>STDC:\$1840 (\$2279.03)<br/>Unadjusted all cause:<br/>PC:\$1727 (\$2139.06)<br/>Unadjusted disease state specific:<br/>HC:\$6919 (\$8569.88), PC:\$785 (\$972.30), MC:\$5192 (\$6430.82),<br/>STDC:\$1717 (\$2126.68)</p> | <p><u>Quality:</u> medium<br/><u>Classification:</u> cost description</p> |
| <p>Hansen et al[33]<br/>2010</p>       | <p>To compare all cause total health care costs</p>                                                                               | <p><u>Design:</u> Retrospective, cohort study</p>                                                                                              | <p><u>Measure:</u> MPR<br/><u>Classification:</u></p>                                                                                                      | <p>Total Healthcare</p>                                                                      | <p><u>Type of Costs:</u> adjusted and unadjusted<br/><u>Classification:</u> all cause and disease</p>                                                                                                                                                                                                                                                                                                                                                                                                                                                                                                                                                                                                                                                                                                                                                                                                                                                                                               | <p><u>Quality:</u> medium<br/><u>Classification:</u> cost</p>             |

|                                               |                                                                                                                                                                                                                                                                      |                                                                                                                                            |                                                                                                                                                                    |                                                                |                                                                                                                                                                                                                                                                                                                                                                                                                                                                                |                                                                         |
|-----------------------------------------------|----------------------------------------------------------------------------------------------------------------------------------------------------------------------------------------------------------------------------------------------------------------------|--------------------------------------------------------------------------------------------------------------------------------------------|--------------------------------------------------------------------------------------------------------------------------------------------------------------------|----------------------------------------------------------------|--------------------------------------------------------------------------------------------------------------------------------------------------------------------------------------------------------------------------------------------------------------------------------------------------------------------------------------------------------------------------------------------------------------------------------------------------------------------------------|-------------------------------------------------------------------------|
| US                                            | and diabetes mellitus specific health care costs between patients who were adherent or non-adherent to monotherapy with metformin, pioglitazone or a sulfonylurea and to examine whether cost differences varied among patients using these oral antidiabetic drugs. | <u>Follow Up:</u> 2 years<br><u>Sample Size:</u> 108592 (A:63830, NA:44762)                                                                | <u>MPR</u> ≥80% = adherent,<br><u>MPR</u> <80% = nonadherent<br><u>Method of Assessment:</u> pharmacy claims data                                                  | costs<br>Inpatient costs<br>Outpatient costs<br>Pharmacy costs | state specific<br><u>Currency Year:</u> USD, 2005<br><u>Cost of Nonadherence#:</u> Adjusted all cause:<br>THC:\$13258 (\$15911.01)<br>Adjusted disease state specific:<br>THC:\$2284 (\$2741.04)<br>Unadjusted all cause:<br>THC:\$15448.50 (\$18539.90),<br>IC:\$4242.33 (\$5091.25),<br>OC:\$ 7377.83, PC:\$3828 (\$4594.01)<br>Unadjusted disease state specific:<br>THC:\$3232.33 (\$3879.15), IC:\$873.50 (\$1048.29), OC:\$1545.67(\$1854.96),<br>PC:\$812.67 (\$975.29) | description                                                             |
| <i>Hong et al</i> [34]<br>2011<br>South Korea | To assess the relationship between initial adherence to oral antihyperglycemic medications and subsequent health outcomes.                                                                                                                                           | <u>Design:</u> Retrospective, cohort study<br><u>Follow Up:</u> 3 years<br><u>Sample Size:</u> 40082 (A:11800, NA:28282)                   | <u>Measure:</u> MPR<br><u>Classification:</u><br><u>MPR</u> ≥80% = adherent,<br><u>MPR</u> <80% = nonadherent<br><u>Method of Assessment:</u> pharmacy claims data | Total costs<br>Hospitalization costs                           | <u>Type of Costs:</u> unadjusted<br><u>Classification:</u> disease state specific<br><u>Currency Year:</u> KRW, 2007<br><u>Cost of Nonadherence:</u><br>TC:₩765453 (\$1142.31),<br>HC:₩397549 (\$593.28)                                                                                                                                                                                                                                                                       | <u>Quality:</u> medium<br><u>Classification:</u> cost description       |
| <i>Jha et al</i> [35]<br>2012<br>US           | How often do previously non-adherent patients become adherent and vice versa?<br>Are changes in adherence associated with increased or                                                                                                                               | <u>Design:</u> Retrospective, observational claims analysis<br><u>Follow Up:</u> unclear<br><u>Sample Size:</u> 135639 (A:99976, NA:36553) | <u>Measure:</u> MPR<br><u>Classification:</u><br><u>MPR</u> ≥80% = adherent,<br><u>MPR</u> <80% = nonadherent<br><u>Method of Assessment:</u>                      | Total costs<br>ED costs<br>Hospitalization costs               | <u>Type of Costs:</u> adjusted<br><u>Classification:</u> disease state specific<br><u>Currency Year:</u> USD, 2011<br><u>Cost of Nonadherence***:</u><br>TC:\$4680000000 (\$5006563305.49),<br>EDC:\$735000000 (\$786287185.80),<br>HC:\$3950000000 (\$4225625012.11)                                                                                                                                                                                                          | <u>Quality:</u> high<br><u>Classification:</u> cost outcome description |

decreased hospitalizations or emergency department visits? Are there certain subgroups of populations that seem to benefit more than others when they adhere to their medication? What are the financial implications of changes in adherence for the nation at large and for Medicare?

pharmacy claims data

White et al[36]  
2004  
US

To assess the relationship between diabetic medication adherence, total healthcare costs and utilisation with patients with type 2 diabetes mellitus and concomitant diabetes and cardiovascular disease.

Design: Retrospective, database analysis  
Follow Up: 1 year  
Sample Size: 67029 (>95:20170, 75-95:14074, <75:16713)

Measure: MPR  
Classification: MPR≥95%, MPR>75%<95%, MPR<75%  
Method of Assessment: pharmacy claims data

Total costs  
Pharmacy costs  
Non-pharmacy costs

Type of Costs: adjusted and unadjusted  
Classification: disease state specific  
Currency Year: USD, 2000  
Cost of Nonadherence: adjusted:  
TC(≥95):\$4835 (\$6518.17),  
TC(75-95):\$5314 (\$7163.92),  
TC(<75):\$5706 (\$7692.38),  
PC(≥95):\$1429 (\$1926.47),  
PC(75-95):\$1157 (\$1559.78),  
PC(<75):\$762 (\$1027.27),  
NPC(≥95):\$3406 (\$4591.70),  
NPC(75-95):\$4157 (\$5604.14),  
NPC(<75):\$4944 (\$6665.11)  
Unadjusted:  
TC(≥95):\$4809 (\$6483.12),  
TC(75-95):\$5333 (\$7189.53),  
TC(<75):\$5605 (\$7556.22),

Quality: low  
Classification: cost analysis

Wu et al[37]  
2009  
US

To examine the predictors of duloxetine compliance and its association with healthcare costs among diabetic peripheral neuropathic pain (DPNP) patients.

Design: Retrospective, cohort study  
Follow Up: 1 year  
Sample Size: 2354 (A:830, NA:1524)

Measure: MPR  
Classification: MPR $\geq$ 80%= high compliance, MPR<80% = low compliance  
Subgroup  
Analysis: commercial and Medicare supplemental  
Method of Assessment: pharmacy claims data

Total healthcare costs  
Inpatient costs  
Outpatient costs  
Pharmacy costs

PC( $\geq$ 95):\$1402 (\$1890.07),  
PC(75-95):\$1153 (\$1554.38),  
PC(<75):\$766 (\$1032.66),  
NPC( $\geq$ 95):\$3407 (\$4593.05),  
NPC(75-95):\$4180 (\$5635.15),  
NPC(<75):\$4839 (\$6523.56)

Type of Costs: adjusted  
Classification: all cause and disease state specific

Currency Year: USD, 2006

Cost of Nonadherence: adjusted all cause:

THC(com):\$32407 (\$37732.29),  
THC(med):\$24622 (\$28668.02),  
IC(com):\$ 12851(\$14692.74),  
IC(med):\$ 6754 (\$7863.85),  
OC(com):\$11888 (\$13841.50),  
OC(med):\$10598 (\$12339.52),  
PC(com):\$7667 (\$8926.88),  
PC(med):\$7270 (\$8464.65)

Adjusted disease state specific:

Diabetes:

THC(com):\$10024 (\$11671.20),  
THC(med):\$5015 (\$5839.09),  
IC(com):\$2232 (\$2598.77),  
IC(med):\$2606 (\$3034.23),  
OC(com):\$1989 (\$2315.84),  
OC(med):\$1231 (\$1433.28),  
PC(com):\$1451 (\$1689.44),  
PC(med):\$1179 (\$1372.74)

DPNP:

THC(com):\$3565 (\$4150.82),  
THC(med):\$2384 (\$2775.75),

Quality: medium  
Classification: cost description

## Osteoporosis

Briesacher et al[38]  
2007  
US

To assess rates of osteoporotic fractures and health care utilisation as a function of bisphosphonate compliance in usual clinical practice.

Design: Retrospective, cohort study  
Follow Up: 3 years  
Sample Size: 17988 (not specified)

Measure: MPR  
Classification: 80-100% = adherent, 60-79% = moderate adherence, 40-59% = moderate adherence, 20-39% = nonadherent, 0-19% = nonadherent  
Method of Assessment: pharmacy claims data

Total costs  
Inpatient costs  
Outpatient costs  
Pharmacy costs

IC(com):\$1739 (\$2024.76),  
IC(med):\$1048 (\$1220.21),  
OC(com):\$362 (\$421.49),  
OC(med):\$181 (\$210.74),  
PC(com):\$1464 (\$1704.57)  
PC(med):\$1155 (\$1344.80)

Type of Costs: adjusted and unadjusted  
Classification: disease state specific  
Currency Year: USD, 2004  
Cost of Nonadherence\*\*\*\*: adjusted:  
TC(80-100):-\$859 (-\$1063.96),  
TC(60-79):-\$474 (-\$587.10),  
TC(40-59):-\$366 (-\$453.33),  
TC(20-39):\$151 (\$187.03),  
IC(80-100):-\$3233 (-\$4004.40),  
IC(60-79):-\$856(-\$1060.24),  
IC(40-59):-\$6221 (-\$7705.34),  
IC(20-39):-\$585 (-\$724.58),  
OC(80-100):-\$445 (-\$551.18),  
OC(60-79):-\$538 (-\$666.37),  
OC(40-59):-\$236 (-\$292.31),  
OC(20-39):\$60 (\$74.32),  
PC(80-100):\$997 (\$1234.89),  
PC(60-79):\$923 (\$1143.23),  
PC(40-59):\$402 (\$497.92),  
PC(20-39):\$160(\$198.18)  
Unadjusted:  
TC(80-100):-\$1273 (-\$1576.74),  
TC(60-79):-\$294 (-\$364.15),  
TC(40-59):-\$573 (-\$709.72),  
TC(20-39):\$101 (\$125.10),  
IC(80-100):-\$883 (-\$1093.68),

Quality: medium  
Classification: cost description



|                                                   |                                                                                                                                                     |                                                                                                                                  |                                                                                                                                                                                         |                                                                                                                              |                                                                                                                                                                                                                                                                                                                                                                                                                                                                                                                                                                                                                                                                                                                                                                                                                                                                                                                   |                                                                                   |
|---------------------------------------------------|-----------------------------------------------------------------------------------------------------------------------------------------------------|----------------------------------------------------------------------------------------------------------------------------------|-----------------------------------------------------------------------------------------------------------------------------------------------------------------------------------------|------------------------------------------------------------------------------------------------------------------------------|-------------------------------------------------------------------------------------------------------------------------------------------------------------------------------------------------------------------------------------------------------------------------------------------------------------------------------------------------------------------------------------------------------------------------------------------------------------------------------------------------------------------------------------------------------------------------------------------------------------------------------------------------------------------------------------------------------------------------------------------------------------------------------------------------------------------------------------------------------------------------------------------------------------------|-----------------------------------------------------------------------------------|
| <p><i>Eisenberg et al</i>[39]<br/>2015<br/>US</p> | <p>To determine healthcare outcomes associated with compliance and noncompliance to bisphosphonate therapy in women diagnosed with osteoporosis</p> | <p><u>Design:</u> Retrospective claims study<br/><u>Follow Up:</u> 2 years<br/><u>Sample Size:</u> 27905 (A:11368, NA:16537)</p> | <p><u>Measure:</u> MPR<br/><u>Classification:</u> (<math>\geq 70\%</math> = compliant, <math>&lt; 70\%</math> = noncompliant)<br/><u>Method of Assessment:</u> pharmacy claims data</p> | <p>Total costs<br/>Inpatient costs<br/>Outpatient costs<br/>ED costs<br/>Pharmacy costs<br/>Physician office visit costs</p> | <p>IC(60-79):-\$384 (-\$475.62),<br/>IC(40-59):-\$597 (-\$739.44),<br/>IC(20-39):-\$93 (-\$115.19),<br/>OC(80-100):-\$774 (-\$958.68),<br/>OC(60-79):-\$193 (-\$239.05),<br/>OC(40-59):-\$145 (-\$179.60),<br/>OC(20-39):\$148 (\$183.31),<br/>PC(80-100):\$384 (\$475.62),<br/>PC(60-79):\$284 (\$351.76),<br/>PC(40-59):\$170 (\$210.56),<br/>PC(20-39):\$48 (\$59.45)</p> <p><u>Type of Costs:</u> unadjusted<br/><u>Classification:</u> all cause and disease state specific<br/><u>Currency Year:</u> USD, 2012<br/><u>Cost of Nonadherence:</u> all cause:<br/>TC:\$7237 (\$7550.72),<br/>IC:\$1986 (\$2072.09),<br/>OC:\$2057 (\$2146.17),<br/>EDC:\$258 (\$269.18),<br/>PC:\$2197 (\$2292.24),<br/>POC:\$738 (\$769.99)</p> <p>Disease state specific:<br/>TC:\$674 (\$703.22),<br/>IC:\$334 (\$348.48),<br/>OC:\$77 (\$80.34),<br/>EDC:\$5 (\$5.22),<br/>PC:\$213 (\$222.23),<br/>POC:\$44 (\$45.91)</p> | <p><u>Quality:</u> medium<br/><u>Classification:</u> cost description</p>         |
| <p><i>Halpern et al</i>[40]<br/>2011<br/>US</p>   | <p>To examine the associations of adherence to osteoporosis therapies</p>                                                                           | <p><u>Design:</u> Retrospective analysis<br/><u>Follow Up:</u> 540 days<br/><u>Sample Size:</u> 21655</p>                        | <p><u>Measure:</u> MPR<br/><u>Classification:</u> (<math>\geq 80\%</math> = high adherence,</p>                                                                                         | <p>Medical costs</p>                                                                                                         | <p><u>Type of Costs:</u> unadjusted<br/><u>Classification:</u> all cause<br/><u>Currency Year:</u> USD, 2006<br/><u>Cost of Nonadherence:</u> commercial:</p>                                                                                                                                                                                                                                                                                                                                                                                                                                                                                                                                                                                                                                                                                                                                                     | <p><u>Quality:</u> medium<br/><u>Classification:</u> cost outcome description</p> |

|                                                 |                                                                                                                                                                                                          |                                                                                                                                      |                                                                                                                                                                               |                                                                                             |                                                                                                                                                                                                                                                                                                                                                                                                                                                                                                                                                                                                                                                                                                                                                                                                                                  |                                                                           |
|-------------------------------------------------|----------------------------------------------------------------------------------------------------------------------------------------------------------------------------------------------------------|--------------------------------------------------------------------------------------------------------------------------------------|-------------------------------------------------------------------------------------------------------------------------------------------------------------------------------|---------------------------------------------------------------------------------------------|----------------------------------------------------------------------------------------------------------------------------------------------------------------------------------------------------------------------------------------------------------------------------------------------------------------------------------------------------------------------------------------------------------------------------------------------------------------------------------------------------------------------------------------------------------------------------------------------------------------------------------------------------------------------------------------------------------------------------------------------------------------------------------------------------------------------------------|---------------------------------------------------------------------------|
|                                                 | with occurrence of closed fracture, all cause medical costs and all cause hospitalizations.                                                                                                              | (≥80%:8759, ≥50<80%:5237, <50%:7659)                                                                                                 | ≥50<80% = moderate adherence, <50% = low adherence<br><u>Method of Assessment:</u> pharmacy claims data                                                                       |                                                                                             | MC(≥80):\$4295 (\$5000.78), MC(50-80):\$4697 (\$5468.84), MC(<50):\$5596 (\$6515.56)<br>Medicare:<br>MC(≥80):\$4590 (\$5344.25), MC(50-80):\$5536 (\$6445.71), MC(<50):\$5801 (\$6754.25)                                                                                                                                                                                                                                                                                                                                                                                                                                                                                                                                                                                                                                        |                                                                           |
| <i>Hazel-Fernandez et al</i> [41]<br>2013<br>US | To evaluate the healthcare utilisation patterns of medicare part D beneficiaries newly initiating teriparatide and to assess the association of medication adherence and persistence with bone fracture. | <u>Design:</u> Retrospective cohort study<br><u>Follow Up:</u> 12 months<br><u>Sample Size:</u> 761 (≥80%:163, ≥50<80%:57, <50%:541) | <u>Measure:</u> PDC<br><u>Classification:</u> (≥80% = high adherence, ≥50<80% = moderate adherence, <50% = low adherence<br><u>Method of Assessment:</u> pharmacy claims data | Total healthcare costs<br>Inpatient costs<br>Outpatient costs<br>ED costs<br>Pharmacy costs | <u>Type of Costs:</u> unadjusted<br><u>Classification:</u> disease state specific and fracture related<br><u>Currency Year:</u> USD, 2010<br><u>Cost of Nonadherence*:</u><br>Disease state specific:<br>THC(≥80):\$21033 (\$22942.39),<br>THC(50-80):\$25574 (\$27895.62),<br>THC(<50):\$15528 (\$16937.64),<br>IC(≥80):\$2198 (\$2397.54),<br>IC(50-80):\$8448 (\$9214.91),<br>IC(<50):\$4897 (\$5341.55),<br>OC(≥80):\$5151 (\$5618.61),<br>OC(50-80):\$6439 (\$7023.54),<br>OC(<50):\$5806 (\$6333.07),<br>EDC(≥80):\$211 (\$230.15),<br>EDC(50-80):\$330 (\$359.96),<br>EDC(<50):\$465 (\$507.21),<br>PC(≥80):\$13472 (\$14695),<br>PC(50-80):\$10358 (\$11298.31),<br>PC(<50):\$4361 (\$4756.89)<br>Fracture related:<br>THC(≥80):\$12670 (\$13820.19),<br>THC(50-80):\$9292 (\$10135.53),<br>THC(<50):\$4419 (\$4820.16), | <u>Quality:</u> medium<br><u>Classification:</u> cost outcome description |

|                                                      |                                                                                                                                                                          |                                                                                                                                 |                                                                                                                                                                                         |                                                              |                                                                                                                                                                                                                                                                                                                                                                                                                                                                                                                                                                                                                                                                                                                                                                                   |                                                                                 |
|------------------------------------------------------|--------------------------------------------------------------------------------------------------------------------------------------------------------------------------|---------------------------------------------------------------------------------------------------------------------------------|-----------------------------------------------------------------------------------------------------------------------------------------------------------------------------------------|--------------------------------------------------------------|-----------------------------------------------------------------------------------------------------------------------------------------------------------------------------------------------------------------------------------------------------------------------------------------------------------------------------------------------------------------------------------------------------------------------------------------------------------------------------------------------------------------------------------------------------------------------------------------------------------------------------------------------------------------------------------------------------------------------------------------------------------------------------------|---------------------------------------------------------------------------------|
| <p><i>Huybrechts et al</i>[42]<br/>2006<br/>US</p>   | <p>To evaluate non-compliance with osteoporosis medications as well as its implications for health and economic outcomes in actual practice.</p>                         | <p><u>Design:</u> Retrospective cohort study<br/><u>Follow Up:</u> 5 years<br/><u>Sample Size:</u> 38120 (A:9530, NA:28590)</p> | <p><u>Measure:</u> MPR<br/><u>Classification:</u> (<math>\geq 80\%</math> = compliant, <math>&lt; 50\%</math> = noncompliant)<br/><u>Method of Assessment:</u> pharmacy claims data</p> | <p>Total costs<br/>Medical costs<br/>Institutional costs</p> | <p>IC(<math>\geq 80</math>):\$366 (\$399.23),<br/>IC(50-80):\$830 (\$905.35),<br/>IC(<math>&lt; 50</math>):\$1325 (\$1445.28),<br/>OC(<math>\geq 80</math>):\$1048 (\$1143.14),<br/>OC(50-80):\$955 (\$1041.70),<br/>OC(<math>&lt; 50</math>):\$767 (\$836.63),<br/>EDC(<math>\geq 80</math>):\$6 (\$6.54),<br/>EDC(50-80):\$9 (\$9.82),<br/>EDC(<math>&lt; 50</math>):\$44 (\$47.99),<br/>PC(<math>\geq 80</math>):\$10810 (\$11791.34),<br/>PC(50-80):\$7420 (\$8093.59),<br/>PC(<math>&lt; 50</math>):\$2068 (\$2255.73)</p> <p><u>Type of Costs:</u> unadjusted<br/><u>Classification:</u> disease state specific<br/><u>Currency Year:</u> USD, 2000<br/><u>Cost of Nonadherence:</u><br/>TC:\$7200 (\$9706.44),<br/>MC:\$1476 (\$1989.84),<br/>InstC:\$5736 (\$7732.80)</p> | <p><u>Quality:</u> low<br/><u>Classification:</u> cost description</p>          |
| <p><i>Kjellberge al</i>[43]<br/>2016<br/>Denmark</p> | <p>To estimate the rate of oral bisphosphonate compliance among Danish women and to examine the association of noncompliance with health care resource use and cost.</p> | <p><u>Design:</u> Retrospective cohort study<br/><u>Follow Up:</u> 1 year<br/><u>Sample Size:</u> 38234 (A:26806, NA:11428)</p> | <p><u>Measure:</u> MPR<br/><u>Classification:</u> (<math>\geq 70\%</math> = compliant, <math>&lt; 70\%</math> = noncompliant)<br/><u>Method of Assessment:</u> pharmacy claims data</p> | <p>Total costs<br/>Medical costs</p>                         | <p><u>Type of Costs:</u> adjusted<br/><u>Classification:</u> all cause and disease state specific<br/><u>Currency Year:</u> Euro, 2011<br/><u>Cost of Nonadherence:</u> all cause:<br/>TC:€4933 (\$6209.58),<br/>MC:€3471 (\$4369.20),<br/>Disease state specific:<br/>TC:€754 (\$949.12),<br/>MC:€426 (\$536.24),</p>                                                                                                                                                                                                                                                                                                                                                                                                                                                            | <p><u>Quality:</u> high<br/><u>Classification:</u> cost outcome description</p> |
| <p><i>Modi et al</i>[44]<br/>2015</p>                | <p>To evaluate compliance with</p>                                                                                                                                       | <p><u>Design:</u> Retrospective cohort study</p>                                                                                | <p><u>Measure:</u> MPR<br/><u>Classification:</u></p>                                                                                                                                   | <p>Total costs<br/>Inpatient costs</p>                       | <p><u>Type of Costs:</u> unadjusted<br/><u>Classification:</u> all cause and disease</p>                                                                                                                                                                                                                                                                                                                                                                                                                                                                                                                                                                                                                                                                                          | <p><u>Quality:</u> medium<br/><u>Classification:</u> cost</p>                   |

|                                            |                                                                                                    |                                                                                                                            |                                                                                                                                                                                                          |                                                                                |                                                                                                                                                                                                                                                                                                                                                                                                                                                                                                                                      |                                                                |
|--------------------------------------------|----------------------------------------------------------------------------------------------------|----------------------------------------------------------------------------------------------------------------------------|----------------------------------------------------------------------------------------------------------------------------------------------------------------------------------------------------------|--------------------------------------------------------------------------------|--------------------------------------------------------------------------------------------------------------------------------------------------------------------------------------------------------------------------------------------------------------------------------------------------------------------------------------------------------------------------------------------------------------------------------------------------------------------------------------------------------------------------------------|----------------------------------------------------------------|
| US                                         | osteoporosis treatments and determine fracture and healthcare burden associated with noncompliance | <u>Follow Up:</u> 1 year<br><u>Sample Size:</u> 27913 (A:23430, NA:34483)                                                  | ( $\geq 80\%$ = compliant, $< 80\%$ = noncompliant)<br><u>Method of Assessment:</u> healthcare claims data                                                                                               | Outpatient costs<br>ED costs<br>Pharmacy costs<br>Medical costs<br>Other costs | state specific<br><u>Currency Year:</u> USD, 2011<br><u>Cost of Nonadherence:</u> all cause:<br>TC:\$11749 (\$12484.12),<br>IC:\$8768 (\$9316.60),<br>OC:\$3945 (\$4191.83),<br>EDC:\$104 (\$110.51),<br>PC:\$2981 (\$3167.52),<br>MC:\$8768 (\$9316.60),<br>OtC:\$997 (\$1059.38)<br>Disease state specific:<br>TC:\$630 (\$669.42),<br>IC:\$443 (\$470.72),<br>OC:\$158 (\$167.89),<br>EDC:\$3 (\$3.19),<br>PC:\$325 (\$345.33),<br>OtC:\$26 (\$27.63)                                                                             | outcome description                                            |
| <i>Olsen et al</i> [45]<br>2013<br>Denmark | To assess the association between refill compliance and all cause health care costs.               | <u>Design:</u> Retrospective observational study<br><u>Follow Up:</u> 2 years<br><u>Sample Size:</u> 47176 (not specified) | <u>Measure:</u> MPR<br><u>Classification:</u> ( $\geq 80\%$ = optimal compliance, $> 50 < 80\%$ = suboptimal compliance, $< 50\%$ = low compliance)<br><u>Method of Assessment:</u> pharmacy claims data | Fracture costs                                                                 | <u>Type of Costs:</u> unadjusted<br><u>Classification:</u> fracture site specific<br><u>Currency Year:</u> DKK, 2010<br><u>Cost of Nonadherence:</u><br>Hip fracture:<br>FC(50-80):kr817575.50 (\$74531.41),<br>FC(<50):kr4454954 (\$549987.04)<br>Spine fracture:<br>FC(50-80):kr174700 (\$21568.12),<br>FC(<50):kr226472 (\$27959.14)<br>Humerus fracture:<br>FC(50-80):kr117776.50 (\$14540.12),<br>FC(<50):kr795217.50 (\$98173.70)<br>Forearm fracture:<br>FC(50-80):-kr463024 (-\$57162.70),<br>FC(<50):kr45072.50 (\$8665.81) | <u>Quality:</u> medium<br><u>Classification:</u> cost analysis |

|                                         |                                                                                                                                                                                                                                  |                                                                                                                                                                                 |                                                                                                                                                                                            |                                                                                                                            |                                                                                                                                                                                                                                                                                                                                                                                                                                                                                                                                                                                                                                                                  |                                                                           |
|-----------------------------------------|----------------------------------------------------------------------------------------------------------------------------------------------------------------------------------------------------------------------------------|---------------------------------------------------------------------------------------------------------------------------------------------------------------------------------|--------------------------------------------------------------------------------------------------------------------------------------------------------------------------------------------|----------------------------------------------------------------------------------------------------------------------------|------------------------------------------------------------------------------------------------------------------------------------------------------------------------------------------------------------------------------------------------------------------------------------------------------------------------------------------------------------------------------------------------------------------------------------------------------------------------------------------------------------------------------------------------------------------------------------------------------------------------------------------------------------------|---------------------------------------------------------------------------|
| <p>Sunycz et al[46]<br/>2008<br/>US</p> | <p>To examine the relationship between persistence and compliance with bisphosphonate therapy and total and osteoporosis related costs and healthcare resource utilisation in a cohort of female bisphosphonate naïve users.</p> | <p><u>Design:</u> Retrospective observational study<br/><u>Follow Up:</u> 3 years<br/><u>Sample Size:</u> 32944 (A:12186, NA:20758)</p>                                         | <p><u>Measure:</u> MPR<br/><u>Classification:</u> (<math>\geq 80\%</math> = compliant, <math>&lt; 80\%</math> = noncompliant)<br/><u>Method of Assessment:</u> pharmacy claims data</p>    | <p>Total healthcare costs<br/>Inpatient costs<br/>Outpatient costs<br/>ED costs<br/>Pharmacy costs<br/>Radiology costs</p> | <p>Other fracture:<br/>FC(50-80):-kr19261.50 (-\$2377.93),<br/>FC(&lt;50):kr684067.50 (\$84451.66)<br/><u>Type of Costs:</u> unadjusted<br/><u>Classification:</u> all cause and disease state specific<br/><u>Currency Year:</u> USD, 2005<br/><u>Cost of Nonadherence:</u><br/>All cause:<br/>THC:\$23660 (\$28394.52),<br/>IC:\$18839 (\$22608.81),<br/>OC:\$10061 (\$12074.27),<br/>EDC:\$832 (\$988.49),<br/>PC:\$6941 (\$8329.94),<br/>RC:\$1079 (\$1294.91)<br/>Disease state specific:<br/>THC:\$1602 (\$1922.57),<br/>IC:\$14074 (\$16890.30),<br/>OC:\$501 (\$601.25),<br/>EDC:\$452 (\$542.45),<br/>PC:\$918 (\$1101.70),<br/>RC:\$184 (\$220.82)</p> | <p><u>Quality:</u> low<br/><u>Classification:</u> cost description</p>    |
| <p>Zhao et al[47]<br/>2014<br/>US</p>   | <p>To examine the association between teriparatide adherence and healthcare utilisation and costs among hip fracture patients.</p>                                                                                               | <p><u>Design:</u> Retrospective cohort study<br/><u>Follow Up:</u> 36 months<br/><u>Sample Size:</u> 824 (<math>\geq 80</math>:362, 50-80%:219, <math>&lt; 50</math>:%:243)</p> | <p><u>Measure:</u> PDC<br/><u>Classification:</u> (<math>\geq 80\%</math> = high, 50-80% = medium, <math>&lt; 50\%</math> = low)<br/><u>Method of Assessment:</u> pharmacy claims data</p> | <p>Total healthcare costs<br/>Inpatient costs<br/>Outpatient costs<br/>Pharmacy costs</p>                                  | <p><u>Type of Costs:</u> adjusted and unadjusted<br/><u>Classification:</u> disease state specific<br/><u>Currency Year:</u> USD, 2010<br/><u>Cost of Nonadherence</u> *:<br/>Adjusted:<br/>THC(<math>\geq 80</math>):\$34428 (\$37553.4),<br/>THC(50-80):\$37956 (\$41401.68),<br/>THC(&lt;50):\$31188 (\$34019.28),<br/>IC(<math>\geq 80</math>):\$7548 (\$8233.20),<br/>IC(50-80):\$11520 (\$1256.80),<br/>IC(&lt;50):\$11556 (\$12605.04),</p>                                                                                                                                                                                                               | <p><u>Quality:</u> medium<br/><u>Classification:</u> cost description</p> |

Zhao et al[48]  
2013  
US

To examine the association between teriparatide (TPTD) adherence and healthcare utilisation and costs in real world US kyphoplasty/vertebroplasty (KV) patients.

Design: Retrospective observational cohort study  
Follow Up: 36 months  
Sample Size: 1568 (>80: 783, 50-80%: 382, <50%: 403)

Measure: PDC  
Classification: (>80% = high, 50-80% = medium, <50% = low)  
Method of Assessment: pharmacy claims data

Total healthcare costs  
Inpatient costs  
Outpatient costs  
Pharmacy costs

OC(>80):\$9312 (\$10157.40),  
OC(50-80):\$12816 (\$13979.40),  
OC(<50):\$13044 (\$14228.16),  
PC(>80):\$18864 (\$20576.52),  
PC(50-80):\$13116 (\$14306.64),  
PC(<50):\$7452 (\$8128.44)

Unadjusted:

THC(>80):\$37464 (\$40865.04),  
THC(50-80):\$35076 (\$38260.20),  
THC(<50):\$29484 (\$32160.60),  
IC(>80):\$7092 (\$7735.80),  
IC(50-80):\$11100 (\$12107.64),  
IC(<50):\$10632 (\$11597.16),  
OC(>80):\$9900 (\$10798.68),  
OC(50-80):\$11352 (\$12382.56),  
OC(<50):\$11988 (\$13076.28),  
PC(>80):\$20484 (\$22343.52),  
PC(50-80):\$12624 (\$13770),  
PC(<50):\$6864 (\$7487.16)

Type of Costs: adjusted and unadjusted  
Classification: disease state specific  
Currency Year: USD, 2010  
Cost of Nonadherence\*:

Adjusted:  
THC(>80):\$40212 (\$43862.52),  
THC(50-80):\$40512 (\$44189.76),  
THC(<50):\$40128 (\$43770.84),  
IC(>80):\$8136 (\$8874.60),  
IC(50-80):\$12060 (\$13154.76),  
IC(<50):\$15444 (\$43404.36),  
OC(>80):\$12924 (\$14097.24),  
OC(50-80):\$14928 (\$16283.16),  
OC(<50):\$17568 (\$19162.80),

Quality: medium  
Classification: cost description

**Respiratory Disease**

*Davis et al*[49]  
2017  
US

To assess the association between adherence levels to different inhaled corticosteroid/long acting  $\beta_2$ -adrenergic agonist and COPD exacerbation rates and costs in commercially insured population

Design: Observational cohort study  
Follow Up: 12 months  
Sample Size: 13657 ( $\geq 80\%$ : 1898,  $\geq 50 < 80\%$ : 1971,  $\geq 30 < 50\%$ : 2443,  $< 30\%$  :7345)

Measure: PDC  
Classification: ( $\geq 80$  = adherent,  $\geq 50 < 80\%$  = mildly nonadherent,  $\geq 30 < 50\%$  = moderately nonadherent,  $< 30\%$  highly nonadherent)  
Method of Assessment: commercially insured healthcare claims data

Total costs  
Outpatient costs  
Pharmacy costs  
Hospitalization costs

PC( $\geq 80$ ):\$19392 (\$21152.40),  
PC(50-80):\$13908 (\$15170.52),  
PC( $< 50$ ):\$8700 (\$9843.24)  
Unadjusted:  
THC( $\geq 80$ ):\$42768 (\$46650.48),  
THC(50-80):\$36780 (\$40118.88),  
THC( $< 50$ ):\$39792 (\$43404.36),  
IC( $\geq 80$ ):\$7620 (\$8311.80),  
IC(50-80):\$12228 (\$13338.12),  
IC( $< 50$ ):\$15768 (\$17199.48),  
OC( $\geq 80$ ):\$14580 (\$15903.60),  
OC(50-80):\$12108 (\$13207.20),  
OC( $< 50$ ):\$15324 (\$16715.16),  
PC( $\geq 80$ ):\$20568 (\$22435.20),  
PC(50-80):\$12444 (\$13573.68),  
PC( $< 50$ ):\$8700 (\$9489.84)

Type of Costs: adjusted  
Classification: all cause and disease state specific  
Currency Year: USD, 2014  
Cost of Nonadherence\*:  
All cause:  
TC( $\geq 80$ ):\$22546 (\$22772.24),  
TC(50-80):\$25545 (\$25800.95),  
TC(30-50):\$24303 (\$24546.51),  
TC( $< 30$ ):\$25148 (\$25399.98),  
OC( $\geq 80$ ):\$7816 (\$7894.31),  
OC(50-80):\$8225 (\$8307.41),  
OC(30-50):\$8365 (\$8448.81),  
OC( $< 30$ ):\$8857 (\$8945.74),  
PC( $\geq 80$ ):\$7954 (\$8033.70),

Quality: medium  
Classification: cost description

|                                               |                                                                                                                                                                                   |                                                                                                                                                                                    |                                                                                                                                            |                                                                      |                                                                                                                                                                                                                                                                                                                                                                                                                                                                                                                                                                                                                                                                                                                                                                                                                                                                                                                                                                                                                                                                                                                                                                                        |                                                                           |
|-----------------------------------------------|-----------------------------------------------------------------------------------------------------------------------------------------------------------------------------------|------------------------------------------------------------------------------------------------------------------------------------------------------------------------------------|--------------------------------------------------------------------------------------------------------------------------------------------|----------------------------------------------------------------------|----------------------------------------------------------------------------------------------------------------------------------------------------------------------------------------------------------------------------------------------------------------------------------------------------------------------------------------------------------------------------------------------------------------------------------------------------------------------------------------------------------------------------------------------------------------------------------------------------------------------------------------------------------------------------------------------------------------------------------------------------------------------------------------------------------------------------------------------------------------------------------------------------------------------------------------------------------------------------------------------------------------------------------------------------------------------------------------------------------------------------------------------------------------------------------------|---------------------------------------------------------------------------|
| <p><i>Delea et al</i>[50]<br/>2008<br/>US</p> | <p>To assess the association between adherence with fluticasone propionate/salmeterol combination product in a single inhaler and asthma care utilisation and costs in asthma</p> | <p><u>Design:</u> Retrospective longitudinal cohort study<br/><u>Follow Up:</u> 24 months<br/><u>Sample Size:</u> 12907 (≥75: 2612, 50-75%: 3608, 25-50%: 5035, &lt;25%: 1652)</p> | <p><u>Measure:</u> MPR<br/><u>Classification:</u> (≥75, 50-75%, 25-50%, &lt;25%)<br/><u>Method of Assessment:</u> pharmacy claims data</p> | <p>Total costs<br/>Outpatient costs<br/>ED costs<br/>Other costs</p> | <p>PC(50-80):\$6862 (\$6930.76),<br/>PC(30-50):\$5485 (\$5539.96),<br/>PC(&lt;30):\$4395 (\$4439.04),<br/>HC(≥80):\$6106 (\$6167.51),<br/>HC(50-80):\$9391 (\$9485.09),<br/>HC(30-50):\$9171 (\$9262.89),<br/>HC(&lt;30):\$10849 (\$10957.70)<br/>Disease state specific:<br/>TC(≥80):\$8075.33 (\$8156.24),<br/>TC(50-80):\$7053 (\$7123.67),<br/>TC(30-50):\$6623 (\$6689.36),<br/>TC(&lt;30):\$5644 (\$5700.55),<br/>OC(≥80):\$2194.33 (\$2216.32),<br/>OC(50-80):\$1947 (\$1966.51),<br/>OC(30-50):\$1997 (\$2017.01),<br/>OC(&lt;30):\$2152 (\$2173.56),<br/>PC(≥80):\$4464 (\$4508.73),<br/>PC(50-80):\$3345 (\$3378.52),<br/>PC(30-50):\$2307 (\$2330.12),<br/>PC(&lt;30):\$1569 (\$1584.72),<br/>HC(≥80):\$1074.67 (\$1085.44),<br/>HC(50-80):\$1155 (\$1166.57),<br/>HC(30-50):\$1619 (\$1635.22),<br/>HC(&lt;30):\$1405 (\$1419.08)</p> <p><u>Type of Costs:</u> unadjusted<br/><u>Classification:</u> disease state specific<br/><u>Currency Year:</u> USD, 2003<br/><u>Cost of Nonadherence</u> *:<br/>TC(≥75):\$1564 (\$1990.27),<br/>TC(50-75):\$1128 (\$1435.44),<br/>TC(25-50):\$900 (\$1145.30),<br/>TC(&lt;25):\$632 (\$804.25),<br/>OC(≥75):\$1272 (\$1618.69),</p> | <p><u>Quality:</u> medium<br/><u>Classification:</u> cost description</p> |
|-----------------------------------------------|-----------------------------------------------------------------------------------------------------------------------------------------------------------------------------------|------------------------------------------------------------------------------------------------------------------------------------------------------------------------------------|--------------------------------------------------------------------------------------------------------------------------------------------|----------------------------------------------------------------------|----------------------------------------------------------------------------------------------------------------------------------------------------------------------------------------------------------------------------------------------------------------------------------------------------------------------------------------------------------------------------------------------------------------------------------------------------------------------------------------------------------------------------------------------------------------------------------------------------------------------------------------------------------------------------------------------------------------------------------------------------------------------------------------------------------------------------------------------------------------------------------------------------------------------------------------------------------------------------------------------------------------------------------------------------------------------------------------------------------------------------------------------------------------------------------------|---------------------------------------------------------------------------|



patients in typical US clinical practice

OC(50-75):\$852 (\$1084.21),  
 OC(25-50):\$600 (\$763.53),  
 OC(<25):\$388 (\$493.75),  
 EDC(≥75):\$32 (\$40.72),  
 EDC(50-75):\$36 (\$45.81),  
 EDC(25-50):\$60 (\$76.35),  
 EDC(<25):\$48 (\$61.08),  
 OtC(≥75):\$292 (\$371.59),  
 OtC(50-75):\$276 (\$351.22),  
 OtC(25-50):\$300 (\$381.77),  
 OtC(<25):\$240 (\$305.41)

*Diehl et al*[51]  
 2010  
 US

To evaluate respiratory-related medical outcomes and cost for infants who were prescribed and received palivizumab in accordance with the dosing schedule recommended by the American Academy of Paediatrics in 2006 versus those who did not.

Design: Retrospective claims analysis  
Follow Up: 7 months  
Sample Size: 245 (A:73, NA:172)

Measure: 37 day gap in claims  
Classification: (>37 day gap in claims = noncompliant)  
Method of Assessment: pharmacy claims data

Total costs  
 Pharmacy costs  
 Services costs

Type of Costs: unadjusted  
Classification: disease state specific  
Currency Year: USD, 2007  
Cost of Nonadherence:  
 TC:\$19093.46 (\$21656.12),  
 PC:\$7647.40 (\$8673.81),  
 SC<sup>\*\*</sup>:\$11604.03 (\$13161.45)

Quality: medium  
Classification: cost description

*Joshi et al*[52]  
 2006  
 US

Examine the association of medication adherence with workplace productivity and health related quality of life in asthma patients.

Design: quantitative analysis  
Follow Up:  
Sample Size: 385 (high:150, medium:73, low: 162)

Measure: Morisky scale  
Classification: (0= high adherence, 1- 2 = medium adherence, >2 = low adherence)  
Method of Assessment:

Total productivity cost  
 Absenteeism costs  
 Presenteeism costs

Type of Costs: unadjusted  
Classification: disease state specific  
Currency Year: USD, 2002  
Cost of Nonadherence<sup>##</sup>:  
 TPC(0):\$1210.90 (\$1571.73),  
 TPC(1-2):\$1428.50 (\$1854.17),  
 TPC(>2):\$1073.10 (\$1392.87),  
 AbC(0):\$633.70 (\$822.53),  
 AbC(1-2):\$608.90 (\$790.34),

Quality: medium  
Classification: cost outcome description

|                                                        |                                                                                                                                                                                               |                                                                                                                                                         |                                                                                                                                                                                           |                                                                                                                                                                                                                                                   |                                                                                                                                                                                                                                                                                                                                                                                                                                                                                                                                                             |                                                                           |
|--------------------------------------------------------|-----------------------------------------------------------------------------------------------------------------------------------------------------------------------------------------------|---------------------------------------------------------------------------------------------------------------------------------------------------------|-------------------------------------------------------------------------------------------------------------------------------------------------------------------------------------------|---------------------------------------------------------------------------------------------------------------------------------------------------------------------------------------------------------------------------------------------------|-------------------------------------------------------------------------------------------------------------------------------------------------------------------------------------------------------------------------------------------------------------------------------------------------------------------------------------------------------------------------------------------------------------------------------------------------------------------------------------------------------------------------------------------------------------|---------------------------------------------------------------------------|
| <p><i>Miravittles et al</i>[53]<br/>2013<br/>Spain</p> | <p>To analyse the economic impact of non-adherence to the global initiative for obstructive lung disease (GOLD) guidelines in patients with chronic obstructive pulmonary disease (COPD).</p> | <p><u>Design:</u> multicentre, retrospective, observational study<br/><u>Follow Up:</u> 18 months<br/><u>Sample Size:</u> 1365 (A:246, NA:1119)</p>     | <p>questionnaire</p> <p><u>Measure:</u> GOLD 2007 Guidelines<br/><u>Classification:</u> (adherent, nonadherent)<br/><u>Method of Assessment:</u> GOLD guidelines</p>                      | <p>ED costs<br/>Pharmacy costs<br/>Physician office visit costs<br/>Hospitalization costs<br/>Primary care costs<br/>Interdisciplinary visit costs<br/>Medical test costs<br/>Radiology costs<br/>Laboratory costs<br/>Total healthcare costs</p> | <p>AbC(&gt;2):\$474.80 (\$616.28),<br/>PrC(0):\$577.20 (\$749.20),<br/>PrC(1-2):\$819.60 (\$1063.83),<br/>PrC(&gt;2):\$598.30 (\$776.59)</p> <p><u>Type of Costs:</u> unadjusted<br/><u>Classification:</u> disease state specific<br/><u>Currency Year:</u> EUR, 2009<br/><u>Cost of Nonadherence:</u><br/>EDC:€40.83 (\$57.91),<br/>PC:€771.50 (\$1094.27),<br/>POC:€106.29 (\$150.76),<br/>HC:€101.61 (\$144.12)<br/>PCC:€123.84 (\$175.65),<br/>IntC:€321.44 (\$455.92),<br/>MTC:€36.66 (\$51.99),<br/>RC:€24.24 (\$34.38),<br/>LC:€17.35 (\$24.61)</p> | <p><u>Quality:</u> medium<br/><u>Classification:</u> cost description</p> |
| <p><i>Quittner et al</i>[54]<br/>2014<br/>US</p>       | <p>To evaluate associations of adherence to pulmonary medications, age, healthcare use and cost among cystic fibrosis patients.</p>                                                           | <p><u>Design:</u> retrospective, cohort study<br/><u>Follow Up:</u> 2 years<br/><u>Sample Size:</u> 3287 (&gt;80%: 663, 50-80%: 949, &lt;50%: 1675)</p> | <p><u>Measure:</u> MPR<br/><u>Classification:</u> (≥80% = high adherence, 50-80% = moderate adherence, &lt;50% = low adherence)<br/><u>Method of Assessment:</u> pharmacy claims data</p> | <p>Total healthcare costs</p>                                                                                                                                                                                                                     | <p><u>Type of Costs:</u> unadjusted<br/><u>Classification:</u> all cause and disease state specific<br/><u>Currency Year:</u> USD, 2011<br/><u>Cost of Nonadherence*:</u><br/>All cause:<br/>THC(≥80):\$35749.50 (\$38244.05),<br/>THC(50-80):\$45031.50 (\$48173.73),<br/>THC(&lt;50):\$50284.50 (\$53793.28)<br/>Disease state specific:<br/>THC(≥80):\$23764 (\$25422.22),</p>                                                                                                                                                                           | <p><u>Quality:</u> medium<br/><u>Classification:</u> cost description</p> |

**Gastrointestinal Disease**

|                                                  |                                                                                                                                                                                                                                    |                                                                                                                                                       |                                                                                                                                                                                                        |                                                                                                     |                                                                                                                                                                                                                                                                                 |                                                                                   |
|--------------------------------------------------|------------------------------------------------------------------------------------------------------------------------------------------------------------------------------------------------------------------------------------|-------------------------------------------------------------------------------------------------------------------------------------------------------|--------------------------------------------------------------------------------------------------------------------------------------------------------------------------------------------------------|-----------------------------------------------------------------------------------------------------|---------------------------------------------------------------------------------------------------------------------------------------------------------------------------------------------------------------------------------------------------------------------------------|-----------------------------------------------------------------------------------|
| <p><i>Carter et al</i>[55]<br/>2011<br/>US</p>   | <p>To further evaluate the impact of adherence to infliximab on CD related utilisation and inpatient costs in the first year of treatment using a different definition of adherence and a larger more diverse claims database.</p> | <p><u>Design:</u> retrospective, observational cohort claims analysis<br/><u>Follow Up:</u> 12 months<br/><u>Sample Size:</u> 638 (A:466, NA:172)</p> | <p><u>Measure:</u> number of infusions in 12 month period<br/><u>Classification:</u> (7-9 infusions = adherent, &lt;7 infusions = nonadherent)<br/><u>Method of Assessment:</u> health claims data</p> | <p>Hospitalization costs</p>                                                                        | <p>THC(50-80):\$33132.50 (\$35444.44),<br/>THC(&lt;50):\$33894 (\$36259.07)<br/><u>Type of Costs:</u> unadjusted<br/><u>Classification:</u> disease state specific<br/><u>Currency Year:</u> USD, 2007<br/><u>Cost of Nonadherence:</u> HC:\$37783 (\$42854.12)</p>             | <p><u>Quality:</u> medium<br/><u>Classification:</u> cost outcome description</p> |
| <p><i>Gosselin et al</i>[56]<br/>2009<br/>US</p> | <p>To examine the effects of gastroesophageal reflux disease (GERD) patients compliance with PPI therapy on health care resource utilisation and costs.</p>                                                                        | <p><u>Design:</u> retrospective cohort study<br/><u>Follow Up:</u><br/><u>Sample Size:</u> 41837 (A:28321, NA:13516)</p>                              | <p><u>Measure:</u> MPR<br/><u>Classification:</u> (≥80% = adherent, &lt;80% = nonadherent)<br/><u>Method of Assessment:</u> pharmacy claims data</p>                                                   | <p>Total costs<br/>Inpatient costs<br/>Outpatient costs<br/>Pharmacy costs<br/>Medical costs</p>    | <p><u>Type of Costs:</u> adjusted<br/><u>Classification:</u> disease state specific<br/><u>Currency Year:</u> USD, 2003<br/><u>Cost of Nonadherence:</u> TC:\$9497 (\$12085.43), IC:\$2116 (\$2692.72), OC:\$5458 (\$6945.59), PC:\$1922 (\$2445.85), MC:\$7575 (\$9639.58)</p> | <p><u>Quality:</u> medium<br/><u>Classification:</u> cost description</p>         |
| <p><i>Kane et al</i>[57]<br/>2009<br/>US</p>     | <p>To evaluate adherence to infliximab maintenance therapy and the impact of medication adherence on healthcare utilisation and costs by patients.</p>                                                                             | <p><u>Design:</u> retrospective cohort analysis<br/><u>Follow Up:</u> 12 months<br/><u>Sample Size:</u> 571 (A:375, NA:196)</p>                       | <p><u>Measure:</u> number of infusions in 12 month period<br/><u>Classification:</u> (≥8 infusions = adherent, &lt;7 infusions = nonadherent)<br/><u>Method of</u></p>                                 | <p>Outpatient costs<br/>ED costs<br/>Pharmacy costs<br/>Medical costs<br/>Hospitalization costs</p> | <p><u>Type of Costs:</u> unadjusted<br/><u>Classification:</u> all cause and disease state specific<br/><u>Currency Year:</u> USD, 2004<br/><u>Cost of Nonadherence:</u> All cause: OC:\$6679 (\$8272.62), EDC:\$314 (\$388.92), MC:\$16129 (\$19977.40),</p>                   | <p><u>Quality:</u> medium<br/><u>Classification:</u> cost outcome description</p> |

|                                       |                                                                                                                                                                                |                                                                                                                                      |                                                                                                                                          |                                                                                                            |                                                                                                                                                                                                                                                                                                                                                                                           |                                                                 |
|---------------------------------------|--------------------------------------------------------------------------------------------------------------------------------------------------------------------------------|--------------------------------------------------------------------------------------------------------------------------------------|------------------------------------------------------------------------------------------------------------------------------------------|------------------------------------------------------------------------------------------------------------|-------------------------------------------------------------------------------------------------------------------------------------------------------------------------------------------------------------------------------------------------------------------------------------------------------------------------------------------------------------------------------------------|-----------------------------------------------------------------|
|                                       |                                                                                                                                                                                |                                                                                                                                      | <u>Assessment:</u><br>health claims data                                                                                                 |                                                                                                            | HC:\$6893 (\$8537.68)<br>Disease state specific:<br>OC:\$3931 (\$4868.94),<br>EDC:\$91 (\$112.71),<br>PC:\$18751 (\$23225.01),<br>MC:\$10243 (\$12686.99),<br>HC:\$4494 (\$5566.27)                                                                                                                                                                                                       |                                                                 |
| <i>Mitra et al</i> [58]<br>2012<br>US | To assess the association between adherence to oral 5-aminosalicylates (5-ASAs) and all cause costs and health care utilisation among patients with active ulcerative colitis. | <u>Design:</u> retrospective, observational cohort study<br><u>Follow Up:</u> 12 months<br><u>Sample Size:</u> 1693 (A:476, NA:1216) | <u>Measure:</u> MPR<br><u>Classification:</u> (≥80% = adherent, <80% = nonadherent)<br><u>Method of Assessment:</u> pharmacy claims data | Inpatient costs<br>Outpatient costs<br>ED costs<br>Pharmacy costs<br>Ancillary costs<br>Non-pharmacy costs | <u>Type of Costs:</u> adjusted<br><u>Classification:</u> all cause and disease state specific<br><u>Currency Year:</u> USD, 2010<br><u>Cost of Nonadherence:</u><br>All cause:<br>PC:\$1541.60 (\$1681.55)<br>Disease state specific:<br>IC:\$28726.65 (\$31334.47),<br>OC:\$1145.67 (\$1249.67),<br>EDC:\$635.95 (\$693.68),<br>AC:\$4923.29 (\$5370.23),<br>NPC:\$14226.32 (\$15517.79) | <u>Quality:</u> high<br><u>Classification:</u> cost description |
| <i>Wan et al</i> [59]<br>2014<br>US   | To examine the effect of adherence versus non-adherence on healthcare costs in patients with inflammatory bowel disease.                                                       | <u>Design:</u> retrospective cohort analysis<br><u>Follow Up:</u> 360 days<br><u>Sample Size:</u> 1646 (A:674, NA:972)               | <u>Measure:</u> MPR<br><u>Classification:</u> (≥80% = adherent, <80% = nonadherent)<br><u>Method of Assessment:</u> pharmacy claims data | Total costs<br>Total healthcare costs<br>Inpatient costs<br>Outpatient costs<br>ED costs<br>Pharmacy costs | <u>Type of Costs:</u> adjusted<br><u>Classification:</u> all cause and disease state specific<br><u>Currency Year:</u> USD, 2009<br><u>Cost of Nonadherence:</u><br>All cause:<br>TC:\$47411 (\$52341.27),<br>THC:\$32522 (\$35903.96),<br>IC:\$17634 (\$19467.76),<br>OC:\$10909 (\$12043.43),<br>EDC:\$458 (\$505.63),<br>PC:\$18410 (\$20324.46)<br>Disease state specific:            | <u>Quality:</u> high<br><u>Classification:</u> cost description |

|                                          |                                                                                                                                                                                                                                                             |                                                                                                                            |                                                                                                                                          |                                                                                                                                         |                                                                                                                                                                                                                                                                                                                                              |                                                                           |
|------------------------------------------|-------------------------------------------------------------------------------------------------------------------------------------------------------------------------------------------------------------------------------------------------------------|----------------------------------------------------------------------------------------------------------------------------|------------------------------------------------------------------------------------------------------------------------------------------|-----------------------------------------------------------------------------------------------------------------------------------------|----------------------------------------------------------------------------------------------------------------------------------------------------------------------------------------------------------------------------------------------------------------------------------------------------------------------------------------------|---------------------------------------------------------------------------|
|                                          |                                                                                                                                                                                                                                                             |                                                                                                                            |                                                                                                                                          |                                                                                                                                         | TC:\$33652 (\$37151.47),<br>THC:\$18764 (\$20715.27),<br>IC:\$12564 (\$13870.53),<br>OC:\$5890 (\$6502.50),<br>EDC:\$48 (\$52.99),<br>PC:\$15150 (\$16725.45)                                                                                                                                                                                |                                                                           |
| <b>Epilepsy</b>                          |                                                                                                                                                                                                                                                             |                                                                                                                            |                                                                                                                                          |                                                                                                                                         |                                                                                                                                                                                                                                                                                                                                              |                                                                           |
| <i>Davis et al</i> [60]<br>2008<br>US    | To assess the extent of refill non-adherence with antiepileptic drugs (AEDs) and the potential association between AED non-adherence and healthcare costs in an adult managed care population.                                                              | <u>Design:</u> retrospective claims analysis<br><u>Follow Up:</u> 12 months<br><u>Sample Size:</u> 10892 (A:6644, NA:4248) | <u>Measure:</u> MPR<br><u>Classification:</u> (≥80% = adherent, <80% = nonadherent)<br><u>Method of Assessment:</u> pharmacy claims data | Total costs<br>Inpatient costs<br>ED costs<br>Pharmacy costs<br>Other pharmacy costs                                                    | <u>Type of Costs:</u> unadjusted<br><u>Classification:</u> disease state specific<br><u>Currency Year:</u> USD, 2003<br><u>Cost of Nonadherence</u> <sup>###</sup> :<br>TC:\$1466 (\$1865.56),<br>IC:\$1799 (\$2289.32),<br>EDC:\$260 (\$330.86),<br>PC:-\$71 (-\$90.35),<br>OtPC:-\$358 (-\$455.57)                                         | <u>Quality:</u> medium<br><u>Classification:</u> cost description         |
| <i>Ettinger et al</i> [61]<br>2009<br>US | To assess the extent to which elderly patients diagnosed with epilepsy are non-adherent to antiepileptic drugs (AEDs) and the potential association between AED non-adherence and seizure recurrence, resource utilisation and annual direct medical costs. | <u>Design:</u> retrospective claims analysis<br><u>Follow Up:</u> 12 months<br><u>Sample Size:</u> 1278 (A:758, NA:520)    | <u>Measure:</u> MPR<br><u>Classification:</u> (≥80% = adherent, <80% = nonadherent)<br><u>Method of Assessment:</u> pharmacy claims data | Total costs<br>Inpatient costs<br>ED costs<br>Pharmacy costs<br>Physician Office visit costs<br>Ancillary costs<br>Other pharmacy costs | <u>Type of Costs:</u> unadjusted<br><u>Classification:</u> disease state specific<br><u>Currency Year:</u> USD, 2003<br><u>Cost of Nonadherence:</u><br>TC:\$17817 (\$22673.06),<br>IC:\$2714 (\$3453.71),<br>EDC:\$526 (\$669.36),<br>PC:\$347 (\$441.58),<br>POC:\$3063 (\$3897.83),<br>AC:\$8344 (\$10618.18),<br>OtPC:\$2822 (\$3591.14) | <u>Quality:</u> medium<br><u>Classification:</u> cost outcome description |
| <i>Faught et al</i> [62]<br>2009<br>US   | To study the impact of non-adherence to antiepileptic drugs                                                                                                                                                                                                 | <u>Design:</u> retrospective observational open cohort design                                                              | <u>Measure:</u> MPR<br><u>Classification:</u> (≥80% = adherent,                                                                          | Total costs<br>Inpatient costs<br>Outpatient                                                                                            | <u>Type of Costs:</u> unadjusted<br><u>Classification:</u> disease state specific<br><u>Currency Year:</u> USD, 2002                                                                                                                                                                                                                         | <u>Quality:</u> medium<br><u>Classification:</u> cost description         |

(AEDs) on healthcare utilisation and direct medical costs in a Medicaid population.

Follow Up: 4.65 years  
Sample Size: 33658  
(A:24907, NA:8751)

<80% = nonadherent)  
Method of Assessment:  
pharmacy claims data

costs  
ED costs  
Pharmacy costs  
Other pharmacy costs

Cost of Nonadherence \* :  
TC:\$14417.64 (\$18713.91),  
IC:\$6682.28 (\$6873.51),  
OC:\$2172.40 (\$2819.75),  
EDC:\$405.96 (\$526.93),  
PC:\$822.40 (\$1067.46),  
OtPC:\$4334.60 (\$5626.26)

## HIV/AIDS

*Barnett et al*[63]  
2011  
US

To characterise the cost of HIV care including combination antiretroviral treatment.

Design: retrospective observational cohort study  
Follow Up: 1 year  
Sample Size: 1896  
(not specified)

Measure:  
antiretroviral taking behaviour  
Classification:  
(85% adherence with 3 antiretroviral therapy regimen = adherent, all other use = nonadherent)  
Method of Assessment:  
pharmacy claims data

Total costs

Type of Costs: unadjusted  
Classification: disease state specific; viral load count  
Currency Year: USD, 2006  
Cost of Nonadherence \*\* :  
High viral load:  
TC:\$25824 (\$30067.54)  
Low viral load:  
TC:\$20509.67 (\$23879.92)

Quality: medium  
Classification: cost description

*Cooke et al*[64]  
2014  
US

To measure adherence to antiretroviral therapy regimens in commercially insured patients with HIV infection and analyse the clinical and demographic factors associated with  $\geq 90\%$  adherence.

Design: retrospective claims analysis  
Follow Up: 1 year  
Sample Size: 3528  
(A:1737, NA:640)

Measure: MPR  
Classification:  
( $\geq 90\%$  = adherent, <90% = nonadherent)  
Method of Assessment:  
pharmacy claims data

Total healthcare costs  
Inpatient costs  
Outpatient costs  
Pharmacy costs

Type of Costs: unadjusted  
Classification: disease state specific  
Currency Year: USD, 2011  
Cost of Nonadherence:  
THC:\$18868 (\$20184.58),  
IC:\$2700 (\$2888.40),  
OC:\$915 (\$978.85),  
PC:\$15253 (\$16317.33)

Quality: medium  
Classification: cost description

|                                                |                                                                                                                                                                                                                          |                                                                                                                                                |                                                                                                                                                                                       |                                                                                                                                                |                                                                                                                                                                                                                                                                                                                                                                                                                                                                                                                                |                                                                                   |
|------------------------------------------------|--------------------------------------------------------------------------------------------------------------------------------------------------------------------------------------------------------------------------|------------------------------------------------------------------------------------------------------------------------------------------------|---------------------------------------------------------------------------------------------------------------------------------------------------------------------------------------|------------------------------------------------------------------------------------------------------------------------------------------------|--------------------------------------------------------------------------------------------------------------------------------------------------------------------------------------------------------------------------------------------------------------------------------------------------------------------------------------------------------------------------------------------------------------------------------------------------------------------------------------------------------------------------------|-----------------------------------------------------------------------------------|
| <p><i>Pruitt et al</i>[65]<br/>2015<br/>US</p> | <p>To examine Medicaid insured HIV positive and AIDS diagnosed patient groups separately to determine association of ART adherence to mean monthly total healthcare expenditures in the 24 month measurement period.</p> | <p><u>Design:</u> retrospective cohort study<br/><u>Follow Up:</u> 2 years<br/><u>Sample Size:</u> 502 (A:56, NA:176)</p>                      | <p><u>Measure:</u> MPR<br/><u>Classification:</u> (<math>\geq 90\%</math> = adherent, <math>&lt; 90\%</math> = nonadherent)<br/><u>Method of Assessment:</u> pharmacy claims data</p> | <p>Total costs<br/>Inpatient costs<br/>Outpatient costs<br/>Pharmacy costs<br/>Other pharmacy costs<br/>Behavioural health inpatient costs</p> | <p><u>Type of Costs:</u> unadjusted<br/><u>Classification:</u> disease state specific<br/><u>Currency Year:</u> USD, 2009<br/><u>Cost of Nonadherence*:</u><br/>HIV:<br/>TC:\$15360 (\$16957.32),<br/>IC:\$3864 (\$4265.76),<br/>OC:\$3948 (\$4358.52),<br/>PC:\$4956 (\$5471.40),<br/>OtPC:\$1764 (\$1947.48),<br/>BHIC:\$840 (\$927.36)<br/>AIDS:<br/>TC:\$27648 (\$30523.08),<br/>IC:\$13008 (\$14360.76),<br/>OC:\$5880 (\$6491.52),<br/>PC:\$5640 (\$6226.56),<br/>OtPC:\$2580 (\$2848.32),<br/>BHIC:\$528 (\$582.96)</p> | <p><u>Quality:</u> medium<br/><u>Classification:</u> cost description</p>         |
| <p><b>Parkinson's Disease</b></p>              |                                                                                                                                                                                                                          |                                                                                                                                                |                                                                                                                                                                                       |                                                                                                                                                |                                                                                                                                                                                                                                                                                                                                                                                                                                                                                                                                |                                                                                   |
| <p><i>Davis et al</i>[66]<br/>2010<br/>US</p>  | <p>To assess the extent to which patients diagnosed with Parkinson's disease are non-adherent with antiparkinson therapy and the potential association between non-adherence and all cause medical costs.</p>            | <p><u>Design:</u> retrospective administrative claims study<br/><u>Follow Up:</u> 12 months<br/><u>Sample Size:</u> 3119 (A:1211, NA:1908)</p> | <p><u>Measure:</u> MPR<br/><u>Classification:</u> (<math>\geq 80\%</math> = adherent, <math>&lt; 80\%</math> = nonadherent)<br/><u>Method of Assessment:</u> pharmacy claims data</p> | <p>Total costs<br/>Pharmacy costs<br/>Medical costs</p>                                                                                        | <p><u>Type of Costs:</u> unadjusted<br/><u>Classification:</u> disease state specific<br/><u>Currency Year:</u> USD, 2001<br/><u>Cost of Nonadherence:</u><br/>TC:\$18511 (\$24262.36),<br/>PC:\$2684 (\$3537.36),<br/>MC:\$15827 (\$20859.12)</p>                                                                                                                                                                                                                                                                             | <p><u>Quality:</u> medium<br/><u>Classification:</u> cost outcome description</p> |
| <p><i>Delea et al</i>[67]<br/>2011<br/>US</p>  | <p>To assess the associations between adherence to</p>                                                                                                                                                                   | <p><u>Design:</u> retrospective historical cohort study<br/><u>Follow Up:</u> 12 months</p>                                                    | <p><u>Measure:</u> PDC<br/><u>Classification:</u> (<math>\geq 80\%</math> =</p>                                                                                                       | <p>Total costs<br/>Inpatient costs<br/>Pharmacy</p>                                                                                            | <p><u>Type of Costs:</u> adjusted and unadjusted<br/><u>Classification:</u> all cause and disease state specific</p>                                                                                                                                                                                                                                                                                                                                                                                                           | <p><u>Quality:</u> high<br/><u>Classification:</u> cost description</p>           |

levodopa/carbidopa/entacapone therapy and healthcare utilisation and costs.

Sample Size: 1215 (A:617, NA:598)

satisfactory, <80% = unsatisfactory)  
Method of Assessment:  
pharmacy claims data

costs  
Other costs

Currency Year: USD, 2005

Cost of Nonadherence:

Adjusted all cause:

TC:\$19686 (\$23625.30),

IC:\$5954 (\$7145.43),

PC:\$6391 (\$7669.88),

OtC:\$8795 (\$10554.94)

Adjusted disease state specific:

TC:\$8574 (\$10289.71),

IC:\$3705 (\$4446.39),

PC:\$3850 (\$4620.41),

OtC:\$1884 (\$2261)

Unadjusted all cause:

TC:\$19362 (\$23236.46),

IC:\$5463 (\$6556.18),

PC:\$6158 (\$7390.26),

OtC:\$7740 (\$9288.82)

Unadjusted disease state specific:

TC:\$9156 (\$10988.18),

IC:\$3238 (\$3885.94),

PC:\$3789 (\$4547.20),

OtC:\$2129 (\$2555.03)

Type of Costs: unadjusted

Classification: disease state specific

Currency Year: USD, 2007

Cost of Nonadherence:

TC(90-100):\$36407 (\$41293.43),

TC(80-89):\$43417 (\$49244.29),

TC(≤79):\$45867 (\$52023.13),

IC(90-100):\$15294 (\$17346.71),

IC(80-89):\$21603 (\$24502.49),

IC(≤79):\$24727 (\$28045.78),

OC(90-100):\$10155 (\$11517.97),

*Wei et al*[68]  
2014  
US

To examine the associations of adherence to antiparkinson drugs with healthcare utilisation and economic outcomes.

Design: retrospective cross-sectional study  
Follow Up: 19 months  
Sample Size: 7583 (90-100%:3948, 80-89%:1456, ≤79%:2179)

Measure: MPR  
Classification:  
(>90<100% = high, >80<89% = moderate, ≤79% = low)  
Method of Assessment:  
pharmacy claims data

Total costs  
Inpatient costs  
Outpatient costs  
Pharmacy costs

Quality: medium  
Classification: cost description



|                           |                                                                                                                                                                                                   |                                                                                                                   |                                                                                                                                          |                                                                                                                                                                                |                                                                                                                                                                                                                                                                                                                                                                                                                                                                                                                                                                                                                                           |                                                                         |
|---------------------------|---------------------------------------------------------------------------------------------------------------------------------------------------------------------------------------------------|-------------------------------------------------------------------------------------------------------------------|------------------------------------------------------------------------------------------------------------------------------------------|--------------------------------------------------------------------------------------------------------------------------------------------------------------------------------|-------------------------------------------------------------------------------------------------------------------------------------------------------------------------------------------------------------------------------------------------------------------------------------------------------------------------------------------------------------------------------------------------------------------------------------------------------------------------------------------------------------------------------------------------------------------------------------------------------------------------------------------|-------------------------------------------------------------------------|
|                           |                                                                                                                                                                                                   |                                                                                                                   |                                                                                                                                          |                                                                                                                                                                                | OC(80-89):\$11838 (\$13426.86),<br>OC(≤79):\$12889 (\$14618.92),<br>PC(90-100):\$10957 (\$12427.61),<br>PC(80-89):\$9976 (\$11314.95),<br>PC(≤79):\$8251 (\$9358.42)                                                                                                                                                                                                                                                                                                                                                                                                                                                                      |                                                                         |
| <b>Musculoskeletal</b>    |                                                                                                                                                                                                   |                                                                                                                   |                                                                                                                                          |                                                                                                                                                                                |                                                                                                                                                                                                                                                                                                                                                                                                                                                                                                                                                                                                                                           |                                                                         |
| <i>Ivanova et al</i> [69] | To compare the rates of severe relapse and total direct and indirect costs over a 2 year period between US based employees with MS who were adherent and non-adherent to disease modifying drugs. | <u>Design:</u> retrospective cohort study<br><u>Follow Up:</u> 2 years<br><u>Sample Size:</u> 648 (A:448, NA:200) | <u>Measure:</u> MPR<br><u>Classification:</u> (≥80% = adherent, <80% = nonadherent)<br><u>Method of Assessment:</u> pharmacy claims data | Total costs<br>Total healthcare costs<br>Inpatient costs<br>Outpatient costs<br>ED costs<br>Pharmacy costs<br>Medical costs<br>Short term disability costs<br>Absenteeism cost | <u>Type of Costs:</u> unadjusted<br><u>Classification:</u> all cause, disease state specific and indirect<br><u>Currency Year:</u> USD, 2007<br><u>Cost of Nonadherence*:</u><br>All cause:<br>TC:\$8079 (\$9276.76),<br>THC:\$6022 (\$6830.25),<br>IC:\$1030.50 (\$1168.81),<br>OC:\$3231 (\$3664.65),<br>EDC:\$143.50 (\$162.76),<br>PC:\$1617 (\$1834.03),<br>MC:\$4405.50 (\$4996.79)<br>Disease state specific:<br>TC:\$3005 (\$3408.32),<br>IC:\$505 (\$572.78),<br>OC:\$1710 (\$1939.51),<br>EDC:\$37 (\$41.97),<br>PC:\$753 (\$854.07),<br>MC:\$2252 (\$2554.26)<br>Indirect:<br>STDC:\$1231 (\$1396.22),<br>AbC:\$826 (\$936.86) | <u>Quality:</u> high<br><u>Classification:</u> cost outcome description |
| <i>Tan et al</i> [70]     | To assess the impact of treatment adherence on MS related hospitalizations                                                                                                                        | <u>Design:</u> retrospective cohort study<br><u>Follow Up:</u> 12 months<br><u>Sample Size:</u> 2446              | <u>Measure:</u> MPR<br><u>Classification:</u> (≥80% = adherent, <80% =                                                                   | Medical costs                                                                                                                                                                  | <u>Type of Costs:</u> adjusted and unadjusted<br><u>Classification:</u> disease state specific<br><u>Currency Year:</u> USD, 2007<br><u>Cost of Nonadherence:</u>                                                                                                                                                                                                                                                                                                                                                                                                                                                                         | <u>Quality:</u> medium<br><u>Classification:</u> cost description       |

|                                       |                                                                                                                                             |                                                                                                                                                                              |                                                                                                                                                                                                      |                                                                                                                                                     |                                                                                                                                                                                                                                                                                                                                                                                                                                                                                                                                              |                                                                 |
|---------------------------------------|---------------------------------------------------------------------------------------------------------------------------------------------|------------------------------------------------------------------------------------------------------------------------------------------------------------------------------|------------------------------------------------------------------------------------------------------------------------------------------------------------------------------------------------------|-----------------------------------------------------------------------------------------------------------------------------------------------------|----------------------------------------------------------------------------------------------------------------------------------------------------------------------------------------------------------------------------------------------------------------------------------------------------------------------------------------------------------------------------------------------------------------------------------------------------------------------------------------------------------------------------------------------|-----------------------------------------------------------------|
|                                       | (inpatient), ER visits, MS relapses and medical costs.                                                                                      | (A:1459, NA:987)                                                                                                                                                             | nonadherent)<br><u>Method of Assessment:</u><br>pharmacy claims data                                                                                                                                 |                                                                                                                                                     | Adjusted:<br>MC:\$4348 (\$5062.49)<br>Unadjusted:<br>MC:\$5179 (\$6030.04)                                                                                                                                                                                                                                                                                                                                                                                                                                                                   |                                                                 |
| <b>Zhao et al[71]</b><br>2011<br>US   | To examine predictors associated with duloxetine adherence and its association with healthcare costs among fibromyalgia patients.           | <u>Design:</u> retrospective cohort analysis<br><u>Follow Up:</u> 12 months<br><u>Sample Size:</u> 5435 (A:1744, NA:3691)                                                    | <u>Measure:</u> MPR<br><u>Classification:</u> ( $\geq 80\%$ = adherent, $< 80\%$ = nonadherent)<br><u>Method of Assessment:</u><br>pharmacy claims data                                              | Total costs<br>Inpatient costs<br>Outpatient costs<br>Pharmacy costs                                                                                | <u>Type of Costs:</u> adjusted<br><u>Classification:</u> disease state specific<br><u>Currency Year:</u> USD, 2008<br><u>Cost of Nonadherence:</u> commercial:<br>TC:\$20323 (\$22609.12),<br>IC:\$4808 (\$5348.85),<br>OC:\$9822 (\$10926.87),<br>PC:\$5693 (\$6333.40)<br><u>Medicare:</u><br>TC:\$25282 (\$28125.96),<br>IC:\$8604 (\$9571.86),<br>OC:\$10068 (\$11200.54),<br>PC:\$6611 (\$7354.67)                                                                                                                                      | <u>Quality:</u> medium<br><u>Classification:</u> cost analysis  |
| <b>Cancer</b>                         |                                                                                                                                             |                                                                                                                                                                              |                                                                                                                                                                                                      |                                                                                                                                                     |                                                                                                                                                                                                                                                                                                                                                                                                                                                                                                                                              |                                                                 |
| <b>Darkow et al[72]</b><br>2007<br>US | Estimate the association between treatment interruptions and non-adherence with imatinib and healthcare costs for US managed care patients. | <u>Design:</u> retrospective observational cohort analysis<br><u>Follow Up:</u> 12 months<br><u>Sample Size:</u> 267 ( $\geq 95\%$ :120, 90-95%:25, 50-90%:69, $< 50\%$ :53) | <u>Measure:</u> MPR<br><u>Classification:</u> ( $\geq 95\%$ = very high, $> 90 < 95\%$ = high, $> 50 < 90\%$ = intermediate, $< 50\%$ = low)<br><u>Method of Assessment:</u><br>pharmacy claims data | Total healthcare costs<br>Inpatient costs<br>Outpatient costs<br>ED costs<br>Pharmacy costs<br>Medical costs<br>Other pharmacy costs<br>Other costs | <u>Type of Costs:</u> unadjusted<br><u>Classification:</u> disease state specific<br><u>Currency Year:</u> USD, 2004<br><u>Cost of Nonadherence:</u><br>THC( $\geq 95$ ):\$42250 (\$52330.90),<br>THC(90-95):\$39236 (\$48597.76),<br>THC(50-90):\$54770 (\$67838.19),<br>THC( $< 50$ ):\$131357 (\$162698.93),<br>IC( $\geq 95$ ):\$1156 (\$1431.82),<br>IC(90-95):\$1362 (\$1686.97),<br>IC(50-90):\$19096 (\$23652.33),<br>IC( $< 50$ ):\$81572 (\$101035.18),<br>OC( $\geq 95$ ):\$9299 (\$11517.75),<br>OC(90-95):\$11148 (\$13807.93), | <u>Quality:</u> high<br><u>Classification:</u> cost description |

Wu et al[73]  
2010  
US

To examine the association between adherence with imatinib and direct healthcare costs and resource utilisation

Design: retrospective observational cohort analysis  
Follow Up: 12 months  
Sample Size: 592 (A:350, NA:242)

Measure: MPR  
Classification: ( $\geq 85\%$  = high adherence,  $< 85\%$  = low adherence )  
Method of Assessment: pharmacy claims data

Total costs  
Inpatient costs  
Outpatient costs  
ED costs  
Pharmacy costs  
Other pharmacy costs

OC(50-90):\$14631 (\$18121.97),  
OC(<50):\$33956 (\$42057.94),  
EDC( $\geq 95$ ):\$36 (\$44.59),  
EDC(90-95):\$568 (\$703.53),  
EDC(50-90):\$104 (\$128.81),  
EDC(<50):\$183 (\$226.66),  
PC( $\geq 95$ ):\$29056 (\$35988.80),  
PC(90-95):\$23693 (\$29346.18),  
PC(50-90):\$18330 (\$22703.56),  
PC(<50):\$8733 (\$10816.70),  
MC( $\geq 95$ ):\$10731 (\$13291.43),  
MC(90-95):\$13452 (\$16661.66),  
MC(50-90):\$34202 (\$42362.64),  
MC(<50):\$116892 (\$144782.57), OtPC( $\geq 95$ ):\$2462 (\$3049.44),  
OtPC(90-95):\$2091 (\$2589.92),  
OtPC(50-90):\$2238 (\$2771.99),  
OtPC(<50):\$5732 (\$7099.66),  
OtC( $\geq 95$ ):\$241 (\$298.50),  
OtC(90-95):\$374 (\$463.24),  
OtC(50-90):\$371 (\$459.52),  
OtC(<50):\$1181 (\$1462.79)  
Type of Costs: unadjusted  
Classification: disease state specific  
Currency Year: USD, 2008  
Cost of Nonadherence:  
TC:\$107341 (\$119415.73),  
IC:\$44498 (\$49503.55),  
OC:\$34097 (\$37932.55),  
EDC:\$248 (\$275.90),  
PC:\$22846 (\$25415.93),  
OtPC:\$5652 (\$6287.79)

Quality: medium  
Classification: cost description

## Addiction

|                                        |                                                                                                                                                                 |                                                                                                                                                     |                                                                                                                                                                     |                                                                                                                                              |                                                                                                                                                                                                                                                                                                                                                  |                                                                   |
|----------------------------------------|-----------------------------------------------------------------------------------------------------------------------------------------------------------------|-----------------------------------------------------------------------------------------------------------------------------------------------------|---------------------------------------------------------------------------------------------------------------------------------------------------------------------|----------------------------------------------------------------------------------------------------------------------------------------------|--------------------------------------------------------------------------------------------------------------------------------------------------------------------------------------------------------------------------------------------------------------------------------------------------------------------------------------------------|-------------------------------------------------------------------|
| <i>Leider et al</i> [74]<br>2011<br>US | To assess the economic burden of chronic opioid users and to determine whether opioid regimen non-adherence contributes to increased healthcare costs.          | <u>Design:</u> retrospective claims based analysis<br><u>Follow Up:</u> 12 months<br><u>Sample Size:</u> 2100 (A:442, NA:1658)                      | <u>Measure:</u> urine testing<br><u>Classification:</u> (positive test = nonadherent, negative test = adherent )<br><u>Method of Assessment:</u> health claims data | Total healthcare costs<br>Inpatient costs<br>Outpatient costs<br>ED costs<br>Pharmacy costs<br>Medical costs                                 | <u>Type of Costs:</u> unadjusted<br><u>Classification:</u> disease state specific<br><u>Currency Year:</u> USD, 2008<br><u>Cost of Nonadherence:</u><br>THC:\$26433 (\$29406.43),<br>IC:\$6361 (\$7076.55),<br>OC:\$9734 (\$10828.97),<br>EDC:\$421 (\$468.36),<br>PC:\$7960 (\$8855.42),<br>MC:\$1957 (\$2177.14)                               | <u>Quality:</u> medium<br><u>Classification:</u> cost analysis    |
| Ruetsch et al[75]<br>2017<br>US        | To examine patient characteristics and outcomes associated with nonadherence to buprenorphine and to identify specific patterns of nonadherent behaviour.       | <u>Design:</u> cross sectional, retrospective analysis health claims data<br><u>Follow Up:</u> 12 months<br><u>Sample Size:</u> 477 (A:172, NA:305) | <u>Measure:</u> MPR<br><u>Classification:</u> ( $\geq 80\%$ = adherent, $< 80\%$ = nonadherent)<br><u>Method of Assessment:</u> health claims data                  | Total healthcare costs<br>Inpatient costs<br>Outpatient costs<br>ED costs<br>Pharmacy costs<br>Physician office visit costs<br>Medical costs | <u>Type of Costs:</u> unadjusted<br><u>Classification:</u> disease state specific<br><u>Currency Year:</u> USD, 2013<br><u>Cost of Nonadherence:</u><br>THC:\$16555 (\$16995.62),<br>IC:\$5657 (\$5807.57),<br>OC:\$5594 (\$5742.89),<br>EDC:\$1147 (\$1177.53),<br>PC:\$2365 (\$2427.95),<br>POC:\$1765 (\$1811.98),<br>MC:\$14190 (\$14567.68) | <u>Quality:</u> medium<br><u>Classification:</u> cost description |
| <i>Tkacz et al</i> [76]<br>2014<br>US  | To estimate the healthcare service utilisation and costs associated with buprenorphine medication assisted therapy adherence among a sample of opioid dependent | <u>Design:</u> retrospective cohort analysis<br><u>Follow Up:</u> 12 months<br><u>Sample Size:</u> 455 (A:146, NA:309)                              | <u>Measure:</u> MPR<br><u>Classification:</u> ( $\geq 80\%$ = adherent, $< 80\%$ = nonadherent)<br><u>Method of Assessment:</u> pharmacy claims data                | Total healthcare costs<br>Inpatient costs<br>Outpatient costs<br>ED costs<br>Pharmacy costs                                                  | <u>Type of Costs:</u> adjusted and unadjusted<br><u>Classification:</u> disease state specific<br><u>Currency Year:</u> USD, 2010<br><u>Cost of Nonadherence:</u><br>Adjusted:<br>THC:\$49051 (\$53503.88),<br>IC:\$26470 (\$28872.96),<br>OC:\$14570 (\$15892.67),<br>EDC:\$4439 (\$4841.98),                                                   | <u>Quality:</u> medium<br><u>Classification:</u> cost description |

members.

PC:\$3581 (\$3906.09)  
Unadjusted:  
THC:\$47868 (\$52213.49),  
IC:\$26043 (\$28407.20),  
OC:\$14173 (\$15459.63),  
EDC:\$4058 (\$4426.39),  
PC:\$3557 (\$3879.91)

**Metabolic conditions other than diabetes mellitus**

*Lee et al*[77]  
2011  
US

To assess the relationship between medication adherence and healthcare costs among US patients on dialysis given cinacalcet to manage secondary hypoparathyroidism.

Design: retrospective cohort study  
Follow Up: 12 months  
Sample Size: 4923 (A:1372, NA:1304)

Measure: MPR  
Classification: ( $\geq 80\%$  = high adherent,  $< 80\%$  = low adherent)  
Method of Assessment: pharmacy claims data

Total costs  
Inpatient costs  
Outpatient costs  
ED costs  
Pharmacy costs  
Other pharmacy costs

Type of Costs: unadjusted  
Classification: all cause and disease state specific  
Currency Year: USD, 2010  
Cost of Nonadherence:  
All cause:  
PC:\$5556 (\$6060.38)  
Disease state specific:  
TC:\$126996 (\$138524.78),  
IC:\$14844 (\$16191.55),  
OC:\$101854 (\$111100.37),  
EDC:\$734 (\$800.63),  
PC:\$3244 (\$3538.49),  
OtPC:\$9564 (\$10432.23)

Quality: medium  
Classification: cost description

**Blood**

*Candrilli et al*[78]  
2011  
US

To investigate the relationships among hydroxyurea adherence, healthcare utilisation and healthcare costs.

Design: retrospective longitudinal study  
Follow Up: 12 months  
Sample Size: 312 (A:110, NA:202)

Measure: MPR  
Classification: ( $\geq 80\%$  = adherent,  $< 80\%$  = nonadherent)  
Method of Assessment:

Total costs  
Inpatient costs  
ED costs  
Pharmacy costs  
Physician office visit

Type of Costs: adjusted  
Classification: all cause and disease state specific  
Currency Year: USD, 2008  
Cost of Nonadherence:  
All cause:  
TC:\$ 20436 (\$22734.83),

Quality: medium  
Classification: cost description

|                                                                 |                                                                                                                                                                   |                                                                                                                         |                                                                                                                                                                    |                          |                                                                                                                                                                                                                                                                                                                      |                                                                        |
|-----------------------------------------------------------------|-------------------------------------------------------------------------------------------------------------------------------------------------------------------|-------------------------------------------------------------------------------------------------------------------------|--------------------------------------------------------------------------------------------------------------------------------------------------------------------|--------------------------|----------------------------------------------------------------------------------------------------------------------------------------------------------------------------------------------------------------------------------------------------------------------------------------------------------------------|------------------------------------------------------------------------|
|                                                                 |                                                                                                                                                                   |                                                                                                                         | pharmacy claims data                                                                                                                                               | costs<br>Ancillary costs | IC:\$9780 (\$10880.15),<br>EDC:\$837 (\$931.15),<br>PC:\$2579 (\$2869.11),<br>POC:\$3483 (\$3874.80),<br>AC:\$3911 (\$4350.95)<br>Disease state specific:<br>TC:\$12097 (\$13457.78),<br>IC:\$7315 (\$8137.86),<br>EDC:\$552 (\$614.09),<br>PC:\$158 (\$175.77),<br>POC:\$1865 (\$2074.79),<br>AC:\$2466 (\$2743.40) |                                                                        |
| <b>All</b><br><i>Alvarez Payero et al</i> [79]<br>2014<br>Spain | To determine the profile of patients who are admitted to hospital as a result of non-adherence and to obtain an estimate of the economic impact for the hospital. | <u>Design:</u> retrospective observational study<br><u>Follow Up:</u> 1527 days<br><u>Sample Size:</u> 87 (A:21, NA:66) | <u>Measure:</u> pharmacy records<br><u>Classification:</u> (>75% = adherent, ≤75% = nonadherent)<br><u>Method of Assessment:</u> pharmacy and hospital claims data | Hospitalization costs    | <u>Type of Costs:</u> unadjusted<br><u>Classification:</u> all cause<br><u>Currency Year:</u> EUR, 2012<br><u>Cost of Nonadherence</u> ####:<br>All cause:<br>HC:€6275.80 (\$8893.94)                                                                                                                                | <u>Quality:</u> low<br><u>Classification:</u> cost outcome description |

A: adherent, NA: nonadherent, MA: moderate adherence, LA: low adherence, NC: noncompliance, NP: nonpersistent, P: persistent, T: turbulent, NE: no exposure, CHF: chronic heart failure, THC: total healthcare costs, TC: total costs, IC: inpatient costs, OC: outpatient costs, EDC: emergency department visit costs, PC: pharmacy costs, MC: medical costs, HC: hospitalization costs, POC: physician office visit costs, NPC: non-pharmacy costs, AC: ancillary costs, OtPC: other pharmacy costs, PAC: psychiatric assessment costs, TCMC: targeted case management costs, ArC: arrest costs, InC: incarceration costs, RC: radiology costs, SC: services costs, InstC: institutional costs, ESC: external services costs, MSC: medical services costs, PCC: primary care costs, MTC: medical test costs, FC: fracture costs, LC: laboratory costs, IntC: interdisciplinary costs, BHIC: behavioural health inpatient costs, STDC: short term disability costs, WCC: workers compensation costs, PTOC: paid time off costs, TPC: total productivity costs, AbC: absenteeism costs, PrC: presenteeism costs, ACC: acute care

costs, OtC: other costs, com: commercial patients, med: Medicare supplemental patients, USD: United States dollar, GBP: Great British Pound, EUR: Euro, DKK: Danish krone, CAD: Canadian dollar, KRW: South Korean won

\*: extrapolated annual cost; \*\*: subgroups averaged; \*\*\*: national estimate of cost; \*\*\*\*: negative value as costs modelled against lowest adherence group; #: extrapolated annual cost and subgroups averaged; ##: cost represents losses in workplace productivity; ###: negative value as costs modelled against adherent group; ####: cost per episode of nonadherence

1. Aubert RE, Yao J, Xia F, et al. Is there a relationship between early statin compliance and a reduction in healthcare utilization? *The American journal of managed care* 2010;**16**:459-66
2. Casciano JP, Dotiwala ZJ, Martin BC, et al. The costs of warfarin underuse and nonadherence in patients with atrial fibrillation: a commercial insurer perspective. *Journal of managed care pharmacy : JMCP* 2013;**19**:302-16
3. Dilokthornsakul P, Chaikyunapruk N, Nimpitakpong P, et al. The Effects of Medication Supply on Hospitalizations and Health-Care Costs in Patients with Chronic Heart Failure. *Value in Health* 2012;**15**:S9-S14 doi: 10.1016/j.jval.2011.11.019[published Online First: Epub Date]].
4. Dragomir A, Côté R, Roy L, et al. Impact of adherence to antihypertensive agents on clinical outcomes and hospitalization costs. *Medical care* 2010;**48**:418-25 doi: 10.1097/MLR.0b013e3181d567bd[published Online First: Epub Date]].
5. Dragomir A, Cote R, White M, et al. Relationship between adherence level to statins, clinical issues and health-care costs in real-life clinical setting. *Value in health : the journal of the International Society for Pharmacoeconomics and Outcomes Research* 2010;**13**(1):87-94 doi: 10.1111/j.1524-4733.2009.00583.x[published Online First: Epub Date]].
6. Pittman DG, Chen W, Bowlin SJ, et al. Adherence to statins, subsequent healthcare costs, and cardiovascular hospitalizations. *The American journal of cardiology* 2011;**107**:1662-6 doi: 10.1016/j.amjcard.2011.01.052[published Online First: Epub Date]].
7. Pittman DG, Tao Z, Chen W, et al. Antihypertensive medication adherence and subsequent healthcare utilization and costs. *The American journal of managed care* 2010;**16**:568-76
8. Rizzo JAS, W. R. Variations in compliance among hypertensive patients by drug class: implications for health care costs. *Clinical therapeutics* 1997;**19**(6):1446-57; discussion 24-5
9. Sokol MC, McGuigan KA, Verbrugge RR, et al. Impact of medication adherence on hospitalization risk and healthcare cost. *Medical care* 2005;**43**:521-30
10. Stroupe KT, Teal EY, Tu W, et al. Association of Refill Adherence and Health Care Use Among Adults with Hypertension in an Urban Health Care System. *Pharmacotherapy* 2006;**26**:779-89 doi: 10.1592/phco.26.6.779[published Online First: Epub Date]].
11. Wu J, Seiber E, Lacombe VA, et al. Medical utilization and costs associated with statin adherence in Medicaid enrollees with type 2 diabetes. *The Annals of pharmacotherapy* 2011;**45**:342-9 doi: 10.1345/aph.1P539[published Online First: Epub Date]].
12. Zhao Y, Zabriski S, Bertram C. Associations between statin adherence level, health care costs, and utilization. *Journal of managed care & specialty pharmacy* 2014;**20**:703-13
13. Bagalman E, Yu-Isenberg KS, Durden E, et al. Indirect costs associated with nonadherence to treatment for bipolar disorder. *Journal of occupational and environmental medicine / American College of Occupational and Environmental Medicine* 2010;**52**:478-85 doi: 10.1097/JOM.0b013e3181db811d[published Online First: Epub Date]].
14. Becker MA, Young MS, Ochshorn E, et al. The relationship of antipsychotic medication class and adherence with treatment outcomes and costs for Florida Medicaid beneficiaries with schizophrenia. *Administration and policy in mental health* 2007;**34**:307-14 doi: 10.1007/s10488-006-0108-5[published Online First: Epub Date]].
15. Eaddy M, Grogg A, Locklear J. Assessment of compliance with antipsychotic treatment and resource utilization in a Medicaid population. *Clinical therapeutics* 2005;**27**:263-72 doi: 10.1016/j.clinthera.2005.02.003[published Online First: Epub Date]].



16. Gilmer TP, Dolder CR, Lacro JP, et al. Adherence to treatment with antipsychotic medication and health care costs among Medicaid beneficiaries with schizophrenia. *The American journal of psychiatry* 2004;**161**:692-9
17. Hong J, Reed C, Novick D, et al. Clinical and economic consequences of medication non-adherence in the treatment of patients with a manic/mixed episode of bipolar disorder: results from the European Mania in Bipolar Longitudinal Evaluation of Medication (EMBLEM) study. *Psychiatry research* 2011;**190**:110-4 doi: 10.1016/j.psychres.2011.04.016[published Online First: Epub Date]].
18. Jiang Y, Ni W. Estimating the Impact of Adherence to and Persistence with Atypical Antipsychotic Therapy on Health Care Costs and Risk of Hospitalization. *Pharmacotherapy* 2015;**35**(9):813-22 doi: 10.1002/phar.1634[published Online First: Epub Date]].
19. Joe S, Lee JS. Association between non-compliance with psychiatric treatment and non-psychiatric service utilization and costs in patients with schizophrenia and related disorders. *BMC psychiatry* 2016;**16**(1):444 doi: 10.1186/s12888-016-1156-3[published Online First: Epub Date]].
20. Knapp M, King D, Pugner K, et al. Non-adherence to antipsychotic medication regimens: associations with resource use and costs. *The British journal of psychiatry : the journal of mental science* 2004;**184**:509-16
21. Offord S, Lin J, Mirski D, et al. Impact of early nonadherence to oral antipsychotics on clinical and economic outcomes among patients with schizophrenia. *Advances in therapy* 2013;**30**:286-97 doi: 10.1007/s12325-013-0016-5[published Online First: Epub Date]].
22. Offord S, Lin J, Wong B, et al. Impact of oral antipsychotic medication adherence on healthcare resource utilization among schizophrenia patients with Medicare coverage. *Community mental health journal* 2013;**49**:625-9 doi: 10.1007/s10597-013-9638-y[published Online First: Epub Date]].
23. Robertson AG, Swanson JW, Van Dorn RA, et al. Treatment participation and medication adherence: effects on criminal justice costs of persons with mental illness. *Psychiatric services (Washington, DC)* 2014;**65**(10):1189-91 doi: 10.1176/appi.ps.201400247[published Online First: Epub Date]].
24. Robinson RL, Long SR, Chang S, et al. Higher costs and therapeutic factors associated with adherence to NCQA HEDIS antidepressant medication management measures: analysis of administrative claims. *Journal of managed care pharmacy : JMCP* 2006;**12**:43-54
25. Svarstad BL, Shireman TI, Sweeney JK. Using drug claims data to assess the relationship of medication adherence with hospitalization and costs. *Psychiatric services (Washington, DC)* 2001;**52**:805-11
26. White TJV, Ann; Ory, Caron; Dezii, Christopher M.; Chang, Eunice. Economic Impact of Patient Adherence with Antidepressant Therapy Within a Managed Care Organization. *Disease Management & Health Outcomes* 2003;**11**(12):817-22 doi: 10.2165/00115677-200311120-00006[published Online First: Epub Date]].
27. An S-Y, Kim HJ, Chun KH, et al. Clinical and economic outcomes in medication-adherent and -nonadherent patients with type 2 diabetes mellitus in the Republic of Korea. *Clinical therapeutics* 2014;**36**:245-54 doi: 10.1016/j.clinthera.2013.12.012[published Online First: Epub Date]].
28. Buysman EK, Anderson A, Bacchus S, et al. Retrospective Study on the Impact of Adherence in Achieving Glycemic Goals in Type 2 Diabetes Mellitus Patients Receiving Canagliflozin. *Adv Ther* 2017;**34**(4):937-53 doi: 10.1007/s12325-017-0500-4[published Online First: Epub Date]].
29. Curtis SE, Boye KS, Lage MJ, et al. Medication adherence and improved outcomes among patients with type 2 diabetes. *The American journal of managed care* 2017;**23**(7):e208-e14
30. Egede LE, Gebregziabher M, Dismuke CE, et al. Medication Nonadherence in Diabetes: Longitudinal effects on costs and potential cost savings from improvement. *Diabetes care* 2012;**35**:2533-39 doi: 10.2337/dc12-0572[published Online First: Epub Date]].

31. Gentil L, Vasiliadis HM, Preville M, et al. Adherence to Oral Antihyperglycemic Agents Among Older Adults With Mental Disorders and Its Effect on Health Care Costs, Quebec, Canada, 2005-2008. *Preventing chronic disease* 2015;**12**:E230 doi: 10.5888/pcd12.150412[published Online First: Epub Date]].
32. Hagen SE, Wright DW, Finch R, et al. Impact of compliance to oral hypoglycemic agents on short-term disability costs in an employer population. *Population health management* 2014;**17**:35-41 doi: 10.1089/pop.2013.0009[published Online First: Epub Date]].
33. Hansen RA, Farley JF, Droege M, et al. A retrospective cohort study of economic outcomes and adherence to monotherapy with metformin, pioglitazone, or a sulfonylurea among patients with type 2 diabetes mellitus in the United States from 2003 to 2005. *Clinical therapeutics* 2010;**32**:1308-19 doi: 10.1016/j.clinthera.2010.07.011[published Online First: Epub Date]].
34. Hong JS, Kang HC. Relationship between oral antihyperglycemic medication adherence and hospitalization, mortality, and healthcare costs in adult ambulatory care patients with type 2 diabetes in South Korea. *Medical care* 2011;**49**:378-84 doi: 10.1097/MLR.0b013e31820292d1[published Online First: Epub Date]].
35. Jha AK, Aubert RE, Yao J, et al. Greater adherence to diabetes drugs is linked to less hospital use and could save nearly \$5 billion annually. *Health affairs (Project Hope)* 2012;**31**:1836-46 doi: 10.1377/hlthaff.2011.1198[published Online First: Epub Date]].
36. White TJV, Ann; Chang, Eunice; Dezii, Christopher M.; Abrams, Geoffrey D. The Costs of Non-Adherence to Oral Antihyperglycemic Medication in Individuals with Diabetes Mellitus and Concomitant Diabetes Mellitus and Cardiovascular Disease in a Managed Care Environment. *Disease Management & Health Outcomes* 2004;**12**(3):181-88 doi: 10.2165/00115677-200412030-00004[published Online First: Epub Date]].
37. Wu N, Chen S, Boulanger L, et al. Duloxetine compliance and its association with healthcare costs among patients with diabetic peripheral neuropathic pain. *Journal of medical economics* 2009;**12**:192-202 doi: 10.3111/13696990903240559[published Online First: Epub Date]].
38. Briesacher BA, Andrade SE, Yood RA, et al. Consequences of poor compliance with bisphosphonates. *Bone* 2007;**41**:882-7 doi: 10.1016/j.bone.2007.07.009[published Online First: Epub Date]].
39. Eisenberg DF, Placzek H, Gu T, et al. Cost and consequences of noncompliance to oral bisphosphonate treatment. *Journal of managed care & specialty pharmacy* 2015;**21**(1):56-65 doi: 10.18553/jmcp.2015.21.1.56[published Online First: Epub Date]].
40. Halpern R, Becker L, Iqbal SU, et al. The association of adherence to osteoporosis therapies with fracture, all-cause medical costs, and all-cause hospitalizations: a retrospective claims analysis of female health plan enrollees with osteoporosis. *Journal of managed care pharmacy : JMCP* 2011;**17**:25-39
41. Hazel-Fernandez L, Louder AM, Foster SA, et al. Association of teriparatide adherence and persistence with clinical and economic outcomes in Medicare Part D recipients: a retrospective cohort study. *BMC musculoskeletal disorders* 2013;**14**:4 doi: 10.1186/1471-2474-14-4[published Online First: Epub Date]].
42. Huybrechts KF, Ishak KJ, Caro JJ. Assessment of compliance with osteoporosis treatment and its consequences in a managed care population. *Bone* 2006;**38**:922-8 doi: 10.1016/j.bone.2005.10.022[published Online First: Epub Date]].
43. Kjellberg J, Jorgensen AD, Vestergaard P, et al. Cost and health care resource use associated with noncompliance with oral bisphosphonate therapy: an analysis using Danish health registries. *Osteoporosis International* 2016;**27**(12):3535-41 doi: 10.1007/s00198-016-3683-7[published Online First: Epub Date]].

44. Modi A, Siris ES, Tang J, et al. Cost and consequences of noncompliance with osteoporosis treatment among women initiating therapy. *Current medical research and opinion* 2015;**31**(4):757-65 doi: 10.1185/03007995.2015.1016605[published Online First: Epub Date]].
45. Olsen KR, Hansen C, Abrahamsen B. Association between refill compliance to oral bisphosphonate treatment, incident fractures, and health care costs--an analysis using national health databases. *Osteoporosis international : a journal established as result of cooperation between the European Foundation for Osteoporosis and the National Osteoporosis Foundation of the USA* 2013;**24**:2639-47 doi: 10.1007/s00198-013-2365-y[published Online First: Epub Date]].
46. Sunyecz JA, Mucha L, Baser O, et al. Impact of compliance and persistence with bisphosphonate therapy on health care costs and utilization. *Osteoporosis international : a journal established as result of cooperation between the European Foundation for Osteoporosis and the National Osteoporosis Foundation of the USA* 2008;**19**:1421-9 doi: 10.1007/s00198-008-0586-2[published Online First: Epub Date]].
47. Zhao Y, Johnston SS, Smith DM, et al. Association between teriparatide adherence and healthcare utilization and costs among hip fracture patients in the United States. *Bone* 2014;**60**:221-6 doi: 10.1016/j.bone.2013.12.016[published Online First: Epub Date]].
48. Zhao Y, Johnston SS, Smith DM, et al. Association between teriparatide adherence and healthcare utilization and costs in real-world US kyphoplasty/vertebroplasty patients. *Osteoporosis International* 2013;**24**:2525-33 doi: 10.1007/s00198-013-2324-7[published Online First: Epub Date]].
49. Davis JR, Wu B, Kern DM, et al. Impact of Nonadherence to Inhaled Corticosteroid/LABA Therapy on COPD Exacerbation Rates and Healthcare Costs in a Commercially Insured US Population. *American health & drug benefits* 2017;**10**(2):92-102
50. Delea TE, Stanford RH, Hagiwara M, et al. Association between adherence with fixed dose combination fluticasone propionate/salmeterol on asthma outcomes and costs\*. *Current medical research and opinion* 2008;**24**:3435-42 doi: 10.1185/03007990802557344[published Online First: Epub Date]].
51. Diehl JL, Daw JR, Coley KC, et al. Medical utilization associated with palivizumab compliance in a commercial and managed medicaid health plan. *Journal of managed care pharmacy : JMCP* 2010;**16**:23-31
52. Joshi AV, Madhavan SS, Ambegaonkar A, et al. Association of medication adherence with workplace productivity and health-related quality of life in patients with asthma. *The Journal of asthma : official journal of the Association for the Care of Asthma* 2006;**43**:521-6 doi: 10.1080/02770900600857010[published Online First: Epub Date]].
53. Miravittles M, Sicras A, Crespo C, et al. Costs of chronic obstructive pulmonary disease in relation to compliance with guidelines: a study in the primary care setting. *Therapeutic advances in respiratory disease* 2013;**7**:139-50 doi: 10.1177/1753465813484080[published Online First: Epub Date]].
54. Quittner AL, Zhang J, Marynchenko M, et al. Pulmonary medication adherence and health-care use in cystic fibrosis. *Chest* 2014;**146**:142-51 doi: 10.1378/chest.13-1926[published Online First: Epub Date]].
55. Carter CT, Waters HC, Smith DB. Impact of infliximab adherence on Crohn's disease-related healthcare utilization and inpatient costs. *Advances in therapy* 2011;**28**:671-83 doi: 10.1007/s12325-011-0048-7[published Online First: Epub Date]].
56. Gosselin A, Luo R, Lohoues H, et al. The impact of proton pump inhibitor compliance on health-care resource utilization and costs in patients with gastroesophageal reflux disease. *Value in health : the journal of the International Society for Pharmacoeconomics and Outcomes Research* 2009;**12**:34-9 doi: 10.1111/j.1524-4733.2008.00399.x[published Online First: Epub Date]].

57. Kane SV, Chao J, Mulani PM. Adherence to infliximab maintenance therapy and health care utilization and costs by Crohn's disease patients. *Advances in therapy* 2009;**26**:936-46 doi: 10.1007/s12325-009-0069-7[published Online First: Epub Date] | .
58. Mitra D, Hodgkins P, Yen L, et al. Association between oral 5-ASA adherence and health care utilization and costs among patients with active ulcerative colitis. *BMC gastroenterology* 2012;**12**:132 doi: 10.1186/1471-230X-12-132[published Online First: Epub Date] | .
59. Wan GJ, Kozma CM, Slaton TL, et al. Inflammatory bowel disease: healthcare costs for patients who are adherent or non-adherent with infliximab therapy. *Journal of medical economics* 2014;**17**:384-93 doi: 10.3111/13696998.2014.909436[published Online First: Epub Date] | .
60. Davis KLC, S. D.; Edin, H. M. Prevalence and cost of nonadherence with antiepileptic drugs in an adult managed care population. *Epilepsia* 2008;**49**(3):446-54 doi: 10.1111/j.1528-1167.2007.01414.x[published Online First: Epub Date] | .
61. Ettinger AB, Manjunath R, Candrilli SD, et al. Prevalence and cost of nonadherence to antiepileptic drugs in elderly patients with epilepsy. *Epilepsy & behavior : E&B* 2009;**14**:324-9 doi: 10.1016/j.yebeh.2008.10.021[published Online First: Epub Date] | .
62. Faught RE, Weiner JR, Guérin A, et al. Impact of nonadherence to antiepileptic drugs on health care utilization and costs: findings from the RANSOM study. *Epilepsia* 2009;**50**:501-9 doi: 10.1111/j.1528-1167.2008.01794.x[published Online First: Epub Date] | .
63. Barnett PG, Chow A, Joyce VR, et al. Determinants of the Cost of Health Services Used by Veterans With HIV. *Medical care* 2011;**49**:848-56 doi: 10.1097/MLR.0b013e31821b34c0[published Online First: Epub Date] | .
64. Cooke CE, Lee HY, Xing S. Adherence to antiretroviral therapy in managed care members in the United States: a retrospective claims analysis. *Journal of managed care pharmacy : JMCP* 2014;**20**:86-92
65. Pruitt Z, Robst J, Langland-Orban B, et al. Healthcare costs associated with antiretroviral adherence among medicaid patients. *Applied health economics and health policy* 2015;**13**:69-80 doi: 10.1007/s40258-014-0138-1[published Online First: Epub Date] | .
66. Davis KL, Edin HM, Allen JK. Prevalence and cost of medication nonadherence in Parkinson's disease: evidence from administrative claims data. *Movement disorders : official journal of the Movement Disorder Society* 2010;**25**(4):474-80 doi: 10.1002/mds.22999[published Online First: Epub Date] | .
67. Delea TE, Thomas SK, Hagiwara M. The association between adherence to levodopa/carbidopa/entacapone therapy and healthcare utilization and costs among patients with Parkinson's disease: a retrospective claims-based analysis. *CNS drugs* 2011;**25**:53-66 doi: 10.2165/11538970-000000000-00000[published Online First: Epub Date] | .
68. Wei Y-J, Palumbo FB, Simoni-Wastila L, et al. Antiparkinson drug adherence and its association with health care utilization and economic outcomes in a Medicare Part D population. *Value in health : the journal of the International Society for Pharmacoeconomics and Outcomes Research* 2014;**17**:196-204 doi: 10.1016/j.jval.2013.12.003[published Online First: Epub Date] | .
69. Ivanova JI, Bergman RE, Birnbaum HG, et al. Impact of medication adherence to disease-modifying drugs on severe relapse, and direct and indirect costs among employees with multiple sclerosis in the US. *Journal of medical economics* 2012;**15**:601-9 doi: 10.3111/13696998.2012.667027[published Online First: Epub Date] | .
70. Tan H, Cai Q, Agarwal S, et al. Impact of adherence to disease-modifying therapies on clinical and economic outcomes among patients with multiple sclerosis. *Advances in therapy* 2011;**28**:51-61 doi: 10.1007/s12325-010-0093-7[published Online First: Epub Date] | .

71. Zhao Y, Chen S-Y, Wu N, et al. Medication Adherence and Healthcare Costs among Fibromyalgia Patients Treated with Duloxetine. *Pain Practice* 2011;**11**:381-91 doi: 10.1111/j.1533-2500.2010.00431.x[published Online First: Epub Date] | .
72. Darkow T, Henk HJ, Thomas SK, et al. Treatment interruptions and non-adherence with imatinib and associated healthcare costs: a retrospective analysis among managed care patients with chronic myelogenous leukaemia. *PharmacoEconomics* 2007;**25**:481-96
73. Wu EQ, Johnson S, Beaulieu N, et al. Healthcare resource utilization and costs associated with non-adherence to imatinib treatment in chronic myeloid leukemia patients. *Current medical research and opinion* 2010;**26**:61-69 doi: 10.1185/03007990903396469[published Online First: Epub Date] | .
74. Leider HL, Dhaliwal J, Davis EJ, et al. Healthcare costs and nonadherence among chronic opioid users. *The American journal of managed care* 2011;**17**:32-40
75. Ruetsch C, Tkacz J, Nadipelli VR, et al. Heterogeneity of nonadherent buprenorphine patients: subgroup characteristics and outcomes. *The American journal of managed care* 2017;**23**(6):e172-e79
76. Tkacz J, Volpicelli J, Un H, et al. Relationship between buprenorphine adherence and health service utilization and costs among opioid dependent patients. *Journal of substance abuse treatment* 2014;**46**:456-62 doi: 10.1016/j.jsat.2013.10.014[published Online First: Epub Date] | .
77. Lee A, Song X, Khan I, et al. Association of cinacalcet adherence and costs in patients on dialysis. *Journal of medical economics* 2011;**14**:798-804 doi: 10.3111/13696998.2011.627404[published Online First: Epub Date] | .
78. Candrilli SD, O'Brien SH, Ware RE, et al. Hydroxyurea adherence and associated outcomes among Medicaid enrollees with sickle cell disease. *American journal of hematology* 2011;**86**:273-7 doi: 10.1002/ajh.21968[published Online First: Epub Date] | .
79. Alvarez Payero M, Martinez Lopez de Castro N, Ucha Samartin M, et al. Medication non-adherence as a cause of hospital admissions. *Farmacia hospitalaria : organo oficial de expresion cientifica de la Sociedad Espanola de Farmacia Hospitalaria* 2014;**38**(4):328-33 doi: 10.7399/fh.2014.38.4.7660[published Online First: Epub Date] | .
