# Supplementary material for: Economic impact of medication non-adherence by disease groups: a systematic review
Source: PubMed Central journal article supplement — BMJ Open. 2018 Jan 21;8(1):e016982. doi: 10.1136/bmjopen-2017-016982 (PMC5780689; doi:10.1136/bmjopen-2017-016982), 2018-01-21
Supplement: bmjopen-2017-016982supp003.pdf [file bmjopen-2017-016982supp003.pdf]

eTable 3: Total cost or total healthcare cost comparison across disease groups

| Disease State                                     | Min adj cost per annum per person | Max adj cost per annum per person | Median adj cost per annum per person | Mean adj cost per annum per person | No. adj studies | Min unadj cost per annum per person | Max unadj cost per annum per person | Median unadj cost per annum per person | Mean unadj cost per annum per person | No. unadj studies | Total studies <sup>1</sup> |
|---------------------------------------------------|-----------------------------------|-----------------------------------|--------------------------------------|------------------------------------|-----------------|-------------------------------------|-------------------------------------|----------------------------------------|--------------------------------------|-------------------|----------------------------|
| Cardiovascular Disease                            | 3347                              | 19472                             | 8080                                 | 9204                               | 6               | 1433                                | 8377.05                             | 5951                                   | 4701                                 | 7                 | 12                         |
| Mental Health                                     | 3253                              | 19363                             | 11262                                | 11052                              | 6               | 2512                                | 25920                               | 17211                                  | 16486                                | 7                 | 14                         |
| Diabetes Mellitus                                 | 2741                              | 9819                              | 6907                                 | 6310                               | 7               | 1142                                | 7950                                | 5534                                   | 4934                                 | 8                 | 11                         |
| Osteoporosis                                      | 949                               | 44190                             | 41402                                | 32866                              | 4               | 669                                 | 43404                               | 9921                                   | 18190                                | 10                | 11                         |
| Respiratory Disease                               | 5701                              | 7124                              | 6689                                 | 6505                               | 1               | 804                                 | 36259                               | 11546                                  | 16124                                | 5                 | 6                          |
| Gastrointestinal Disease                          | 12085                             | 37151                             | 20715                                | 23317                              | 3               |                                     |                                     |                                        |                                      | 2                 | 5                          |
| Epilepsy                                          |                                   |                                   |                                      |                                    | 0               | 1866                                | 22673                               | 18714                                  | 14418                                | 3                 | 3                          |
| HIV/AIDS                                          |                                   |                                   |                                      |                                    | 0               | 16957                               | 30523                               | 23880                                  | 24322                                | 3                 | 3                          |
| Parkinson's Disease                               |                                   |                                   |                                      | 10290*                             | 1               | 10988                               | 52023                               | 36753                                  | 34129                                | 3                 | 3                          |
| Musculoskeletal conditions                        |                                   |                                   |                                      | 25368*                             | 2               |                                     |                                     |                                        | 3408.32*                             | 2                 | 3                          |
| Cancer                                            |                                   |                                   |                                      |                                    | 0               | 48598                               | 162699                              | 93627                                  | 99638                                | 2                 | 2                          |
| Addiction                                         |                                   |                                   |                                      | 53504*                             | 1               | 16996                               | 52213                               | 29406                                  | 32872                                | 3                 | 3                          |
| Metabolic conditions other than diabetes mellitus |                                   |                                   |                                      |                                    | 0               |                                     |                                     |                                        | 138525*                              | 1                 | 1                          |
| Blood conditions                                  |                                   |                                   |                                      | 13458*                             | 1               |                                     |                                     |                                        |                                      | 0                 | 1                          |
| All causes                                        | 5271                              | 52341                             | 17132                                | 21257                              | 14              | 1037                                | 53793                               | 16308                                  | 19352                                | 10                | 30**                       |

Costs reported in \$US2015 dollars

<sup>1</sup>Some studies included both adjusted and unadjusted costs

\*Single total cost/total healthcare cost reported

\*\* In addition to disease-specific studies of the economic impact of medication nonadherence, studies reported the all-causes costs, encompassing cost drivers such as comorbidities. Alvarez Payero et al reported all cause costs only.

 Do not report total cost/total healthcare cost  
 Single total cost/total healthcare cost reported
